# Supplementary material for: Multifaceted Stoichiometry Control of Bacterial Operons Revealed by Deep Proteome Quantification
Source: Front Genet. 2019 May 24;10:473. doi: 10.3389/fgene.2019.00473 (PMC6544118; doi:10.3389/fgene.2019.00473)
Supplement: FIGURE S1 — Physical and chemical features of quantified and unquantified proteins in E. coli. Panels (A–D) are distributions of protein isoelectric point, instability, protein length, and hydrophobicity. Instability tests a protein for stability, which value above 40 means the protein has a shorter half-life. The Kolmogorov–Smirnov test (KS-test) was used to test the distribution between quantified and unquantified proteins. Significance different were found between quantified and unquantified proteins indicated different physical–chemical characterizations of them. [file Data_Sheet_1.zip]

Archive with 8 entries (8 files):
- Supplementary Figures.pdf
- Supplementary In house python scripts.py
- Supplementary table S1 DIA MSMS isolation windows Table.xlsx
- Supplementary table S2 Spectral Library.xlsx
- Supplementary table S3 Protein abundances and properties used in this work.xlsx
- Supplementary table S4 P-value of Mann-WhiteneyU test between complex and pathway operons.xlsx
- Supplementary table S5 P-value of Gene ontology (GO) overrepresentation of the operons with lower and higher CV than the randomized median.xlsx
- Supplementary. The relationship of submitted raw data.pdf
