# Supplementary material for: Multifaceted Stoichiometry Control of Bacterial Operons Revealed by Deep Proteome Quantification
Source: Front Genet. 2019 May 24;10:473. doi: 10.3389/fgene.2019.00473 (PMC6544118; doi:10.3389/fgene.2019.00473)
Supplement: FIGURE S1 — Physical and chemical features of quantified and unquantified proteins in E. coli. Panels (A–D) are distributions of protein isoelectric point, instability, protein length, and hydrophobicity. Instability tests a protein for stability, which value above 40 means the protein has a shorter half-life. The Kolmogorov–Smirnov test (KS-test) was used to test the distribution between quantified and unquantified proteins. Significance different were found between quantified and unquantified proteins indicated different physical–chemical characterizations of them. [file Data_Sheet_1.zip › Supplementary In house python scripts.py]

# coding: utf-8


import glob,os,math
import pandas as pd
import numpy as np
import matplotlib.pyplot as plt
import seaborn as sns
import scipy.stats
import scipy.stats as stats  
from scipy.stats import ttest_ind   # run mannwhitneyu test and kruskal-test for mean and median in Figure2
import random as rd  # import random module
from scipy.stats import ks_2samp
from matplotlib_venn import venn2, venn2_circles
from sklearn import datasets
from sklearn import linear_model
from regressors import stats
# In[95]:


def fenzu(df,n=1):  #class the genes in the database by distance of adjacent genes
    temp_list=[]
    for k,v in enumerate(df['cds_distance'].values):
        if df.iloc[k]['OperonID']!=df.iloc[k-1]['OperonID'] and n==1:
            temp_list.append('-')
        elif v<=-50:
            temp_list.append('<-50')
        elif -50<v<=-40:
            temp_list.append('-40 ~ -50')
        elif -40<v<=-30:
            temp_list.append('-30 ~ -40')
        elif -30<v<=-20:
            temp_list.append('-20 ~ -30') 
        elif -20<v<=-10:
            temp_list.append('-10 ~ -20') 
        elif -10<v<=0:
            temp_list.append('0 ~ -10')
        elif v<=0:
            temp_list.append('<= 0')
        elif 0<v<=10:
            temp_list.append('0~10')
        elif 10<v<=20:
            temp_list.append('10~20') 
        elif 20<v<=30:
            temp_list.append('20~30') 
        elif 30<v<=40:
            temp_list.append('30~40')  
        elif 40<v<=50:
            temp_list.append('40~50')
        elif 50<v<=60:
            temp_list.append('50~60')
        elif 60<v<=70:
            temp_list.append('60~70')
        elif 70<v<=80:
            temp_list.append('70~80')
        elif 80<v<=90:
            temp_list.append('80~90')
        elif 90<v<=100:
            temp_list.append('90~100')
        elif 100<v<=200:
            temp_list.append('100~200')
        elif 200<v<=300:
            temp_list.append('200~300')
        elif 300<v<=400:
            temp_list.append('300~400')
        elif 400<v<=500:
            temp_list.append('400~500')
        elif 500<v<=600:
            temp_list.append('500~600')
        elif 600<v<=700:
            temp_list.append('600~700') 
        elif 700<v<=800:
            temp_list.append('700~800')
        elif 800<v<=900:
            temp_list.append('800~900')
        elif 900<v<=1000:
            temp_list.append('900~1000')
        else:
            temp_list.append('> 1000') 
    return temp_list


def draw_corrlation():   #draw Fig1.B-F
    sns.set_style('white')
    fig = plt.figure(figsize=(12,8))
    
    ax1=fig.add_subplot(231)
    ax2=fig.add_subplot(234)
    ax3=fig.add_subplot(235) 
    ax4=fig.add_subplot(236)
    ax5=fig.add_subplot(232)    
    fig.subplots_adjust(hspace=0.25)
    fig.subplots_adjust(wspace=0.25)
    fontsize1 = 10
    fontsize2 = 10
    fontsize3 = 10
    #DIA
#     DIA=dia_result4[['Synonym','OperonID','Product','BW25113_1','BW25113_2','datasets']]
    DIA_7.index=DIA_7['Synonym']

    DIA_7['lg1']=pd.DataFrame(DIA_7['BW25113_1_cn'].apply(lambda x:np.log10(x)))
    DIA_7['lg2']=pd.DataFrame(DIA_7['BW25113_2_cn'].apply(lambda x:np.log10(x)))
    DIA_77 = DIA_7[(DIA_7['lg1'].notnull())&(DIA_7['lg2'].notnull())]    
    r = round(DIA_7['lg1'].corr(DIA_7['lg2'],method='pearson'),3)
    print r
    DIA_7_low=DIA_77[DIA_77['lg1']<2]
    r_low = round(DIA_7_low['lg1'].corr(DIA_7_low['lg2'],method='pearson'),2)
    DIA_7_mid=DIA_77[(DIA_77['lg1']>=2)&(DIA_77['lg1']<3.5)]
    r_mid = round(DIA_7_mid['lg1'].corr(DIA_7_mid['lg2'],method='pearson'),2)
    DIA_7_high=DIA_7[DIA_77['lg1']>=3.5]
    r_high = round(DIA_7_high['lg1'].corr(DIA_7_high['lg2'],method='pearson'),2)
    
    r_low_txt =  'r_low = %s\nn = %s'%(r_low,len(DIA_7_low))
    r_mid_txt = 'r_mid = %s\nn = %s'%(r_mid,len(DIA_7_mid))
    r_high_txt = 'r_high = %s\nn = %s'%(r_high,len(DIA_7_high))
    r_txt = 'R = %s'%(r)#,len(DIA))
    
#     r_txt = 'R = %s\\nn = %s'%(r)#,len(DIA))
    sns.regplot(x="lg1", y="lg2", data=DIA_7, marker='.',dropna=True,ax=ax1);
    
    ax1.set_xlim([0.5,5])
    ax1.set_ylim([0.5,5])
    ax1.set_xlabel('DIA_7 replicate1,log scale',fontsize=fontsize3)
    ax1.set_ylabel('DIA_7 replicate2,log scale')
    ax1.annotate(r_txt , xy=(0.5, 2.5), xytext=(0.6, 3.5),size=fontsize1) 
    ax1.annotate(r_low_txt , xy=(0.5, 4.5), xytext=(0.6, 4.6),size = fontsize2) 
    ax1.annotate(r_mid_txt , xy=(2.1, 4.5), xytext=(2.1, 4.6),size = fontsize2) 
    ax1.annotate(r_high_txt , xy=(3, 4.5), xytext=(3.6, 4.6),size = fontsize2)
    DIA_7_n = len(DIA_77)
    print "DIA_7_n",DIA_7_n
    ax1.annotate(DIA_7_n, xy=(3, 4.5), xytext=(0.8, 2.6),size = fontsize1)
    ax1.plot([3.5,3.5],[0, 5], color='gray', linewidth=1, linestyle="--")
    ax1.plot([2,    2],[0, 5], color='gray', linewidth=1, linestyle="--")
    
    #APEX------------------------------------
    APEX=ref_pd[['APEX copies/cell13','APEX copies/cell ']]
    APEX = APEX.dropna()
    APEX['lg1']=pd.DataFrame(APEX['APEX copies/cell13'].apply(lambda x:np.log10(x)))
    APEX['lg2']=pd.DataFrame(APEX['APEX copies/cell '].apply(lambda x:np.log10(x)))
    
    r =  round(APEX['lg1'].corr(APEX['lg2'],method='pearson'),3)
    print 'APEX',r
    APEX_low = APEX[APEX['lg1']<2]
    r_low = round(APEX_low['lg1'].corr(APEX_low['lg2'],method='pearson'),2)
    APEX_mid = APEX[(APEX['lg1']>=2)&(APEX['lg1']<3.5)]
    r_mid = round(APEX_mid['lg1'].corr(APEX_mid['lg2'],method='pearson'),2)
    APEX_high=APEX[APEX['lg1']>=3.5]
    r_high = round(APEX_high['lg1'].corr(APEX_high['lg2'],method='pearson'),2)
    
    r_low_txt =  'r_low = %s\nn = %s'%(r_low,len(APEX_low))
    r_mid_txt = 'r_mid = %s\nn = %s'%(r_mid,len(APEX_mid))
    r_high_txt = 'r_high = %s\nn = %s'%(r_high,len(APEX_high))
    r_txt = 'R = %s'%(r)
    sns.regplot(x="lg1", y="lg2", data=APEX, marker='.', dropna=True,ax=ax2);
    ax2.set_xlim([0.5,5])
    ax2.set_ylim([0.5,5])
    ax2.set_xlabel('APEX replicate1,log scale')
    ax2.set_ylabel('APEX replicate2,log scale')
    ax2.annotate(r_txt , xy=(0.5, 2.5), xytext=(0.6, 3.5),size = fontsize1)
    ax2.annotate(r_low_txt , xy=(0.5, 4.5), xytext=(0.6, 4.6),size = fontsize2) 
    ax2.annotate(r_mid_txt , xy=(2.1, 4.5), xytext=(2.1, 4.6),size = fontsize2) 
    ax2.annotate(r_high_txt , xy=(3, 4.5), xytext=(3.6, 4.6),size = fontsize2)
    APEX_n = len(APEX)
    print "APEX_n",APEX_n
    ax2.annotate(APEX_n, xy=(3, 4.5), xytext=(0.8, 2.6),size = fontsize1)
    ax2.plot([3.5,3.5],[0, 5], color='gray', linewidth=1, linestyle="--")
    ax2.plot([2,    2],[0, 5], color='gray', linewidth=1, linestyle="--")
    
    #iBAQ-----------------------------------
    iBAQ=ref_pd[['iBAQ copies/cell20','iBAQ copies/cell']].dropna()
    iBAQ['lg1']=pd.DataFrame(iBAQ['iBAQ copies/cell20'].apply(lambda x:np.log10(x)))
    iBAQ['lg2']=pd.DataFrame(iBAQ['iBAQ copies/cell'].apply(lambda x:np.log10(x)))
    
    r =  round(iBAQ['lg1'].corr(iBAQ['lg2'],method='pearson'),3)
    print r
    iBAQ_low=iBAQ[iBAQ['lg1']<2]
    r_low=round(iBAQ_low['lg1'].corr(iBAQ_low['lg2'],method='pearson'),2)
    iBAQ_mid=iBAQ[(iBAQ['lg1']>=2)&(iBAQ['lg1']<3.5)]
    r_mid=round(iBAQ_mid['lg1'].corr(iBAQ_mid['lg2'],method='pearson'),2)
    iBAQ_high=iBAQ[iBAQ['lg1']>=3.5]
    r_high=round(iBAQ_high['lg1'].corr(iBAQ_high['lg2'],method='pearson'),2)
    
    r_low_txt =  'r_low = %s\nn = %s'%(r_low,len(iBAQ_low))
    r_mid_txt = 'r_mid = %s\nn = %s'%(r_mid,len(iBAQ_mid))
    r_high_txt = 'r_high = %s\nn = %s'%(r_high,len(iBAQ_high))
    r_txt = 'R = %s'%(r)
    sns.regplot(x="lg1", y="lg2", data=iBAQ, marker='.',dropna=True,ax=ax3);
    ax3.set_xlim([0.5,5])
    ax3.set_ylim([0.5,5])
    ax3.set_xlabel('iBAQ replicate1,log scale')
    ax3.set_ylabel('iBAQ replicate2,log scale')
    ax3.annotate(r_txt , xy=(0.5, 2.5), xytext=(0.6, 3.5),size = fontsize1)
    ax3.annotate(r_low_txt , xy=(0.5, 4.5), xytext=(0.6, 4.6),size = fontsize2) 
    ax3.annotate(r_mid_txt , xy=(2.1, 4.5), xytext=(2.1, 4.6),size = fontsize2) 
    ax3.annotate(r_high_txt , xy=(3, 4.5), xytext=(3.6, 4.6),size = fontsize2)
    iBAQ_n = len(iBAQ)
    print "iBAQ_n",iBAQ_n
    ax3.annotate(iBAQ_n, xy=(3, 4.5), xytext=(0.8, 2.6),size = fontsize1)
    ax3.plot([3.5,3.5],[0, 5], color='gray', linewidth=1, linestyle="--")
    ax3.plot([2,    2],[0, 5], color='gray', linewidth=1, linestyle="--")
    
    #emPAI
    emPAI=ref_pd[['emPAI copies/cell27','emPAI copies/cell']].dropna()
    emPAI['lg1']=pd.DataFrame(emPAI['emPAI copies/cell27'].apply(lambda x:np.log10(x)))
    emPAI['lg2']=pd.DataFrame(emPAI['emPAI copies/cell'].apply(lambda x:np.log10(x)))
    
    r =  round(emPAI['lg1'].corr(emPAI['lg2'],method='pearson'),3)
    print r
    emPAI_low=emPAI[emPAI['lg1']<2]
    r_low=round(emPAI_low['lg1'].corr(emPAI_low['lg2'],method='pearson'),2)
    emPAI_mid=emPAI[(emPAI['lg1']>=2)&(emPAI['lg1']<3.5)]
    r_mid=round(emPAI_mid['lg1'].corr(emPAI_mid['lg2'],method='pearson'),2)
    emPAI_high=emPAI[emPAI['lg1']>=3.5]
    r_high=round(emPAI_high['lg1'].corr(emPAI_high['lg2'],method='pearson'),2)
    
    r_low_txt =  'r_low = %s\nn = %s'%(r_low,len(emPAI_low))
    r_mid_txt = 'r_mid = %s\nn = %s'%(r_mid,len(emPAI_mid))
    r_high_txt = 'r_high = %s\nn = %s'%(r_high,len(emPAI_high))
    r_txt = 'R = %s'%(r)
    sns.regplot(x="lg1", y="lg2", data=emPAI,marker='.',dropna=True,ax=ax4);
    ax4.set_xlim([0.5,5])
    ax4.set_ylim([0.5,5])
    ax4.set_xlabel('emPAI replicate1,log scale')
    ax4.set_ylabel('emPAI replicate2,log scale')
    ax4.annotate(r_txt , xy=(0.5, 2.5), xytext=(0.6, 3.5),size = fontsize1)
    ax4.annotate(r_low_txt , xy=(0.5, 4.5), xytext=(0.6, 4.6),size = fontsize2) 
    ax4.annotate(r_mid_txt , xy=(2.1, 4.5), xytext=(2.1, 4.6),size = fontsize2) 
    ax4.annotate(r_high_txt , xy=(3, 4.5), xytext=(3.6, 4.6),size = fontsize2)
    emPAI_n = len(emPAI)
    print "emPAI_n",emPAI_n
    ax4.annotate(emPAI_n, xy=(3, 4.5), xytext=(0.8, 2.6),size = fontsize1)
    ax4.plot([3.5,3.5],[0, 5], color='gray', linewidth=1, linestyle="--")
    ax4.plot([2,    2],[0, 5], color='gray', linewidth=1, linestyle="--")

#DIA_6
    DIA_6.index=DIA_6['Synonym']
    DIA_6['lg1']=pd.DataFrame(DIA_6['BW25113_1_cn'].apply(lambda x:np.log10(x)))
    DIA_6['lg2']=pd.DataFrame(DIA_6['BW25113_2_cn'].apply(lambda x:np.log10(x)))
    DIA_66 = DIA_6[(DIA_6['lg1'].notnull())&(DIA_6['lg2'].notnull())]    

    r =  round(DIA_66['lg1'].corr(DIA_66['lg2'],method='pearson'),3)
    print r
    DIA_6_low=DIA_66[DIA_66['lg1'] < 2]
    r_low=round(DIA_6_low['lg1'].corr(DIA_6_low['lg2'],method='pearson'),2)
    DIA_6_mid=DIA_66[(DIA_66['lg1']>= 2)&(DIA_66['lg1']<3.5)]
    r_mid=round(DIA_6_mid['lg1'].corr(DIA_6_mid['lg2'],method='pearson'),2)
    DIA_6_high=DIA_66[DIA_66['lg1']>=3.5]
    r_high=round(DIA_6_high['lg1'].corr(DIA_6_high['lg2'],method='pearson'),2)
    
    r_low_txt =  'r_low = %s\nn = %s'%(r_low,len(DIA_6_low))
    r_mid_txt = 'r_mid = %s\nn = %s'%(r_mid,len(DIA_6_mid))
    r_high_txt = 'r_high = %s\nn = %s'%(r_high,len(DIA_6_high)) 
    r_txt = 'R = %s'%(r)
    sns.regplot(x="lg1", y="lg2", data=DIA_6,marker='.',dropna=True,ax=ax5);
    ax5.set_xlim([0.5,5])
    ax5.set_ylim([0.5,5])
    ax5.set_xlabel('DIA_6 replicate1,log scale')
    ax5.set_ylabel('DIA_6 replicate2,log scale')
    ax5.annotate(r_txt , xy=(0.5, 2.5), xytext=(0.6, 3.5),size = fontsize1)
    ax5.annotate(r_low_txt , xy=(0.5, 4.5), xytext=(0.6, 4.6),size = fontsize2) 
    ax5.annotate(r_mid_txt , xy=(2.1, 4.5), xytext=(2.1, 4.6),size = fontsize2) 
    ax5.annotate(r_high_txt , xy=(3, 4.5), xytext=(3.6, 4.6),size = fontsize2)
    DIA_6_n = len(DIA_66)
    print "DIA_6_n",DIA_6_n
    ax5.annotate(DIA_6_n, xy=(3, 4.5), xytext=(0.8, 2.6),size = fontsize1)
    ax5.plot([3.5,3.5],[0, 5], color='gray', linewidth=1, linestyle="--")
    ax5.plot([2,    2],[0, 5], color='gray', linewidth=1, linestyle="--")    


def drawpic1(operon_num):
    ratio_operon_pd1 = ratio_operon_pd[(ratio_operon_pd.operon_all == operon_num) & (ratio_operon_pd.operon_this >= 2)]  
    ratio_operon_pd1['lg_dataset']=ratio_operon_pd1['datasets'].apply(lambda x:np.log2(x))
    sns.set_style('whitegrid')
    sns.boxplot(x='OperonID', y='lg_dataset', data=ratio_operon_pd1,linewidth=0.5)
    sns.stripplot(x='OperonID', y='lg_dataset', data=ratio_operon_pd1,marker="o",edgecolor="gray", size=3,alpha=.85,color='red');
    plt.xticks(rotation=50,size=9)

    plt.yticks()
    plt.ylabel('Protein abundance, log scale') 
    return ratio_operon_pd1


# In[101]:


def drawpic2(ratio_operon_pd1):
    operon_exp_temp=pd.DataFrame(index=set(ratio_operon_pd1['OperonID']))
    operon_exp_temp['mean_abundance'] = ratio_operon_pd1.groupby(by=['OperonID'])['lg_dataset'].mean()
    operon_exp_temp['sd'] = pd.DataFrame(ratio_operon_pd1.groupby(by=['OperonID'])['lg_dataset'].std())
    operon_exp_temp['sd/mean'] = operon_exp_temp['sd']/operon_exp_temp['mean_abundance']
    operon_exp_temp['operon_this'] = ratio_operon_pd1.groupby(by=['OperonID'])['operon_this'].mean()
    operon_exp_temp['operon_all'] = ratio_operon_pd1.groupby(by=['OperonID'])['operon_all'].mean()   
    operon_exp_temp['group']=  ratio_operon_pd1.groupby(by=['OperonID'])['group'].max()  
    sns.set_style('white') 
    sns.swarmplot(x='group',y='sd/mean',data=operon_exp_temp, color="r", alpha=.7,size=2.5,order=[ '<-50', '-30 ~ -40', '-20 ~ -30','-10 ~ -20','0 ~ -10', '0-10', '10-20', '20-30',  '30-40','40-50', '50-60', '60-70', '70-80',  '80-90','90-100','100-200']) 
    plt.ylim([0.02,0.25])
    plt.xticks(rotation=50,size=9)
    plt.ylabel('Protein abundance, sd/mean')
    plt.xlabel('Distance between adjacent genes in one operon, bp')
    return operon_exp_temp


# In[102]:


def covert_newoperon(ratio_operon_pd1):
    newgroup=[]
    i=0
    j=1
    operon_fuck=[]
    ratio_operon_pd1=ratio_operon_pd1.sort_values(by=['Start'])
    ratio_operon_pd3=pd.DataFrame(columns=ratio_operon_pd1.columns)
    for i,v in enumerate(ratio_operon_pd1.index):
        if i<len(ratio_operon_pd1)-1: # i不是最后一个
            if (ratio_operon_pd1.iloc[i]['OperonID']==ratio_operon_pd1.iloc[i+1]['OperonID'])&(ratio_operon_pd1.iloc[i+1]['group_order']-ratio_operon_pd1.iloc[i]['group_order']==1):
                newgroup.append(ratio_operon_pd1.iloc[i+1]['group'])
                newgroup.append(ratio_operon_pd1.iloc[i+1]['group'])
                operon_fuck.append(i)
                operon_fuck.append(i)            
                ratio_operon_pd3=ratio_operon_pd3.append(ratio_operon_pd1.iloc[i])
                ratio_operon_pd3=ratio_operon_pd3.append(ratio_operon_pd1.iloc[i+1])
                j+=1
        else:
            pass
    ratio_operon_pd3['new_group']=pd.DataFrame(newgroup,index=ratio_operon_pd3.index)
    ratio_operon_pd3['new_operon']=pd.DataFrame(operon_fuck,index=ratio_operon_pd3.index)
    ratio_operon_pd1=ratio_operon_pd3[ratio_operon_pd3['new_group']!=1]
    return ratio_operon_pd1

def drawpic1_1(operon_num):
    ratio_operon_pd1 = ratio_operon_pd[(ratio_operon_pd.operon_all >= operon_num) & (ratio_operon_pd.operon_this >= 2)]  
    ratio_operon_pd1['lg_dataset']=ratio_operon_pd1['datasets'].apply(lambda x:np.log2(x))
    sns.set_style('whitegrid')
    sns.boxplot(x='OperonID', y='lg_dataset', data=ratio_operon_pd1,linewidth=0.5)
    sns.stripplot(x='OperonID', y='lg_dataset', data=ratio_operon_pd1,marker="o",edgecolor="gray", size=3,alpha=.85,color='red');
    plt.xticks(rotation=50,size=9)
    plt.yticks()
    plt.ylabel('Protein abundance, log scale') 
    return ratio_operon_pd1

def drawpic1_2(operon_num):  
    ratio_operon_pd1 = ratio_operon_pd[(ratio_operon_pd.operon_all >= operon_num) & (ratio_operon_pd.operon_this >= operon_num-2)]  
    ratio_operon_pd1['lg_dataset']=ratio_operon_pd1['datasets'].apply(lambda x:np.log2(x))

    return ratio_operon_pd1

def drawpic1_3(operon_num, ratio_operon_pd,order=1):  #
    ratio_operon_pd1 = ratio_operon_pd[(ratio_operon_pd.operon_all >= operon_num) & (ratio_operon_pd.operon_this >= 2)]  
    ratio_operon_pd1['lg_dataset']=ratio_operon_pd1['datasets'].apply(lambda x:np.log2(x))
    #
    operon_pd1_mean = ratio_operon_pd1.groupby(by=['OperonID'])['lg_dataset'].mean()
    
    #求-------------
    operon_pd1_mean = ratio_operon_pd1.groupby(by=['OperonID'])['lg_dataset'].mean()
    ratio_operon_pd1['mean_operon'] = [operon_pd1_mean[i] for i in ratio_operon_pd1['OperonID'] ]
    #除-----------
    ratio_operon_pd1['mean_lg_dataset'] = ratio_operon_pd1['lg_dataset'] / ratio_operon_pd1['mean_operon']
    #------------------------------------------------------------------
    sns.set_style('whitegrid')
    plt.figure(figsize=(10,6))
    sns.boxplot(x='OperonID', y='mean_lg_dataset', data=ratio_operon_pd1,linewidth=0.5,order=order)
    sns.stripplot(x='OperonID', y='mean_lg_dataset', data=ratio_operon_pd1,marker="o",edgecolor="gray", size=3,alpha=.85,color='red',order=order);
    sns.stripplot(x='OperonID', y='mean_lg_dataset', data=ratio_operon_pd1,marker="o",edgecolor="gray", size=3,alpha=.85,color='red',order=order);
    plt.xticks(rotation=50,size=9)
    plt.yticks()
    plt.ylabel('Protein abundance, log scale') 
    return ratio_operon_pd1

def statis_operon(ratio_operon_pd1):
    operon_exp_temp=pd.DataFrame(index=set(ratio_operon_pd1['OperonID']))
    operon_exp_temp['mean_abundance'] = ratio_operon_pd1.groupby(by=['OperonID'])['lg_dataset'].mean()
    operon_exp_temp['sd'] = pd.DataFrame(ratio_operon_pd1.groupby(by=['OperonID'])['lg_dataset'].std())
    operon_exp_temp['sd/mean'] = operon_exp_temp['sd']/operon_exp_temp['mean_abundance']
    operon_exp_temp['operon_this'] = ratio_operon_pd1.groupby(by=['OperonID'])['operon_this'].mean()
    operon_exp_temp['operon_all'] = ratio_operon_pd1.groupby(by=['OperonID'])['operon_all'].mean()
    operon_exp_temp['C/P'] = ratio_operon_pd1.groupby(by=['OperonID'])['C/P'].min()
    try:
        operon_exp_temp['rd_mean_abundance'] = ratio_operon_pd1.groupby(by=['OperonID'])['random_lg_dataset'].mean()
        operon_exp_temp['rd_sd'] = pd.DataFrame(ratio_operon_pd1.groupby(by=['OperonID'])['random_lg_dataset'].std())    
        operon_exp_temp['rd_sd/rd_mean'] = operon_exp_temp['rd_sd']/operon_exp_temp['rd_mean_abundance']
    except:
        pass
    return operon_exp_temp

def statis_newoperon(ratio_operon_pd1):
    operon_exp_temp=pd.DataFrame(index=set(ratio_operon_pd1['new_operon']))
    operon_exp_temp['mean_abundance'] = ratio_operon_pd1.groupby(by=['new_operon'])['lg_dataset'].mean()
    operon_exp_temp['sd'] = pd.DataFrame(ratio_operon_pd1.groupby(by=['new_operon'])['lg_dataset'].std())
    operon_exp_temp['sd/mean'] = operon_exp_temp['sd']/operon_exp_temp['mean_abundance']
    operon_exp_temp['operon_this'] = ratio_operon_pd1.groupby(by=['new_operon'])['operon_this'].mean()
    operon_exp_temp['operon_all'] = ratio_operon_pd1.groupby(by=['new_operon'])['operon_all'].mean()   
    return operon_exp_temp

def new_statis_operon(operon_exp_temp,ratio_operon_pd1):    
    operon_exp_temp['new_group']=  ratio_operon_pd1.groupby(by=['new_operon'])['new_group'].max()  
    operon_exp_temp['OperonID']=  ratio_operon_pd1.groupby(by=['new_operon'])['OperonID'].max() 
    operon_exp_temp['cds_distance']=  [ratio_operon_pd1.iloc[k]['cds_distance'] for k in range(len(ratio_operon_pd1) ) if k%2.0!=0]
    operon_exp_temp=pd.DataFrame(index=set(ratio_operon_pd1['OperonID']))
    operon_exp_temp['mean_abundance'] = ratio_operon_pd1.groupby(by=['OperonID'])['lg_dataset'].mean()
    operon_exp_temp['sd'] = pd.DataFrame(ratio_operon_pd1.groupby(by=['OperonID'])['lg_dataset'].std())
    operon_exp_temp['sd/mean'] = operon_exp_temp['sd']/operon_exp_temp['mean_abundance']
    operon_exp_temp['operon_this'] = ratio_operon_pd1.groupby(by=['OperonID'])['operon_this'].mean()
    operon_exp_temp['operon_all'] = ratio_operon_pd1.groupby(by=['OperonID'])['operon_all'].mean() 
    return operon_exp_temp

def drawpic2_2(ratio_operon_pd1):
    operon_exp_temp=pd.DataFrame(index=set(ratio_operon_pd1['new_operon']))
    operon_exp_temp['mean_abundance'] = ratio_operon_pd1.groupby(by=['new_operon'])['lg_dataset'].mean()
    operon_exp_temp['sd'] = pd.DataFrame(ratio_operon_pd1.groupby(by=['new_operon'])['lg_dataset'].std())
    operon_exp_temp['sd/mean'] = operon_exp_temp['sd']/operon_exp_temp['mean_abundance']
    operon_exp_temp['operon_this'] = ratio_operon_pd1.groupby(by=['new_operon'])['operon_this'].mean()
    operon_exp_temp['operon_all'] = ratio_operon_pd1.groupby(by=['new_operon'])['operon_all'].mean()   
    operon_exp_temp['new_group']=  ratio_operon_pd1.groupby(by=['new_operon'])['new_group'].max()  
    operon_exp_temp['OperonID']=  ratio_operon_pd1.groupby(by=['new_operon'])['OperonID'].max() 
    operon_exp_temp['cds_distance']=  [ratio_operon_pd1.iloc[k]['cds_distance'] for k in range(len(ratio_operon_pd1) ) if k%2.0!=0]    
    sns.set_style('white')
    sns.swarmplot(x='cds_distance',y='sd/mean',data=operon_exp_temp, color="r", alpha=.7,size=2.5)
    plt.xticks(rotation=50,size=9)
    plt.ylim([-0.01,0.25])
    plt.ylabel('Protein abundance, sd/mean')
    plt.xlabel('Distance between adjacent genes in one operon, bp')
    return operon_exp_temp


#
def distrubution_draw(operon_exp_temp):
    unique_list=operon_exp_temp['group'].unique()
    for i in unique_list:
        temp_pd=operon_exp_temp[operon_exp_temp['group']==i]
    
        sns.kdeplot(temp_pd['sd/mean'], shade=False,label=i)
    plt.ylabel('Protein Numbers')
    plt.xlabel('sd/mean Values')
    ax = plt.gca() 
    ax.spines['top'].set_visible(False)
    ax.spines['right'].set_visible(False)


def all_distrubution_draw_upanddown(operon_exp_temp):
    sns.set(style="ticks", color_codes=True)
    unique_list=operon_exp_temp['group'].unique()

    fmean = ratio_operon_pd2[['sd/mean','rd_sd/rd_mean']].mean()
    fmedian = ratio_operon_pd2[['sd/mean','rd_sd/rd_mean']].median()
    #--------------------------------------------------------------------------------------
    plt.figure(figsize=(5,6))
    plt.subplot(2, 1, 1)
    temp_pd=operon_exp_temp[operon_exp_temp['group']==unique_list[0]]
    a = temp_pd['sd/mean']
    plt.hist(a,50, facecolor='#0165fc', alpha=0.9,label=unique_list[0])
    plt.xlim(-0.01,0.3)  
    plt.ylim(0,27)
    plt.xticks([])
    plt.plot([fmedian[0],fmedian[0]], [0,27],
            color='red', linewidth=1.5, linestyle="--")
    plt.text(fmedian[0]+0.005, 23, r'Median = %s'%(round(fmedian[0],3)))

    plt.plot([fmean[0],fmean[0]], [0,20],
            color='red', linewidth=1.5, linestyle="--")
    plt.text(fmean[0]+0.005, 18, r'Mean = %s'%(round(fmean[0],3)))
    plt.xlabel('')
    plt.legend()
    plt.grid(False)
    ax = plt.gca() 
    ax.spines['top'].set_visible(False)
    ax.spines['right'].set_visible(False)

    #----------------------------------------------
    plt.subplot(2, 1, 2)    
    temp_pd=operon_exp_temp[operon_exp_temp['group']==unique_list[1]]
    a = temp_pd['sd/mean']
    plt.hist(a,50, facecolor='#b00149', alpha=0.8, label=unique_list[1])

    plt.xlim(-0.01,0.3)  
    plt.ylim(0,27)
    plt.plot([fmedian[1],fmedian[1]], [0,27],
            color='red', linewidth=1.5, linestyle="--")
    plt.text(fmedian[1]+0.005, 23, r'Median = %s'%(round(fmedian[1],3)))

    plt.plot([fmean[1],fmean[1]], [0,20],
            color='red', linewidth=1.5, linestyle="--")
    plt.text(fmean[1]+0.005, 18, r'Mean = %s'%(round(fmean[1],3)))
    plt.xlabel('')
    plt.legend()
    plt.grid(False)
    ax = plt.gca() 
    ax.spines['top'].set_visible(False)  
    ax.spines['right'].set_visible(False) 
    plt.ylabel('Protein Numbers')
    plt.xlabel('sd/mean distrubution')

### Randomized the quantified protein abundance in operon，compare the CV 

sns.plotting_context("talk", rc={"lines.linewidth": 2})
def draw_all_random_sd_mean(ratio_operon_pdx):
    ratio_operon_pdx['random_lg_dataset'] = ratio_operon_pdx['lg_dataset']
    #随机打乱顺序后，其他没变
    rd.shuffle(ratio_operon_pdx['random_lg_dataset'].values)  #key process to make randomized data

    ratio_operon_pd2 =  statis_operon(ratio_operon_pdx)
    ratio_operon_pd2['group1']='Measured data'
    ratio_operon_pd2['group2']='RD'
    print 'Len',len(ratio_operon_pd2)

    new_pd = pd.DataFrame(list(ratio_operon_pd2[['sd/mean','group1']].values)+(list(ratio_operon_pd2[['rd_sd/rd_mean','group2']].values)) ,columns=['sd/mean','group'])
    #sns.stripplot(x='group',y='sd/mean',data=new_pd, color="r", alpha=.7,size=2.5,jitter=True)
    sns.swarmplot(x='group',y='sd/mean',data=new_pd, color="r", alpha=.7,size=2.5)#,jitter=True)    
    sns.boxplot(x='group',y='sd/mean',data=new_pd,width=0.4)
    return new_pd,ratio_operon_pd2


# # Now, Start!!-------------------------------------------------------------------------------------------------------------------------------

 ##bw25113
dia_result_file = 'g:\\SoftDownLoad\\201709_Ecoli\\newarticle\\2018new_BW25113\\conbined_result_pep7_pep6_BW25113_new0328.txt'
operon_file = 'g:\\SoftDownLoad\\201709_Ecoli\\1944.opr'  #operon file download from operonDB.
outputdir = 'g:\\SoftDownLoad\\201709_Ecoli\\newarticle\\2018new_BW25113\\output_new0602'
 #mg1655
dia_result_file = 'g:\\SoftDownLoad\\201709_Ecoli\\newarticle\\2018new_MG1655\\conbined_result_pep7_pep6_MG1655_newpop.txt'
operon_file = 'g:\\SoftDownLoad\\201709_Ecoli\\1944.opr'
outputdir = 'g:\\SoftDownLoad\\201709_Ecoli\\newarticle\\2018new_MG1655\\output_new0602'
try:
    os.makedirs(outputdir)
except:
    pass

dia_result = pd.read_csv(dia_result_file,sep = '\t')
dia_result['GI'] = dia_result['ProteinAccessions']#.str.replace('>gi|','')
dia_result['GI'] = [int(i) for i in dia_result['GI']]
dia_result.index=dia_result['GI'] 
operon_pd = pd.read_table(operon_file) #operon list
operon_pd.index = operon_pd['GI'].apply(lambda x:int(x))   #set GI as index
#sort operon_pd
operon_pd = operon_pd.sort_values(by = ['Start'])  
temp=pd.DataFrame([0]+[operon_pd.iloc[i]['Start']-operon_pd.iloc[i-1]['End'] for i in range(len(operon_pd.index)) if i>0],columns=['distance'],index=operon_pd.index)
operon_pd['cds_distance'] = temp
#class the genes in database
operon_pd['group']=pd.DataFrame(fenzu(operon_pd,n=1),index=operon_pd.index) 

txt=[]
j=1
for i in range(len(operon_pd.index)):
    if operon_pd.iloc[i-1]['OperonID']!=operon_pd.iloc[i]['OperonID']:
        j=1
        txt.append(j)
    elif operon_pd.iloc[i-1]['OperonID']==operon_pd.iloc[i]['OperonID']:
        j+=1
        txt.append(j)        
operon_pd['group_order']=pd.DataFrame(txt,index=operon_pd.index)
temp_result=pd.merge(dia_result,operon_pd,left_index=True, right_index=True)  #main list
dia_result1_pep7 = temp_result[temp_result['in_KU_2014_pep7_1702']>=2]  #peptide number>=2

dia_result1_pep6 = temp_result[temp_result['in_KU_2014_pep6_1']>=1]  #peptide number>=1


# In[447]:


dia_result1_pep7.head()

#copynuber for dia_result1_pep7  
gmean=lambda x,y: int((x*y)**(1./2))  #
dia_result4_pep7=dia_result1_pep7.copy()
list_temp=[]
for x,y in zip(list(dia_result4_pep7['BW25113_1']),list(dia_result4_pep7['BW25113_2'])):
 x = float(x)
 y = float(y)
 if not np.isnan(x) and not np.isnan(y):  
     list_temp.append(gmean(x,y))
 elif not np.isnan(x) or not np.isnan(y): #
     if np.isnan(x):
         list_temp.append(y)
     elif np.isnan(y):
         list_temp.append(x)
 else:
     list_temp.append(0)

dia_result4_pep7['datasets'] =list_temp
dia_result4_pep7 = dia_result4_pep7[dia_result4_pep7['datasets']!=0]
print len(dia_result4_pep7)
r=dia_result4_pep7['BW25113_1'].corr(dia_result4_pep7['BW25113_2'],method='pearson')
r2=r*r
print "dia_result4_pep7 r2=",r2
fname = outputdir+'\\dia_result4_pep7.csv'
dia_result4_pep7.to_csv(fname)

#copynuber for dia_result1_pep6  
gmean=lambda x,y: int((x*y)**(1./2))  #define Geometric mean
dia_result4_pep6 = dia_result1_pep6.copy()
list_temp=[]
for x,y in zip(list(dia_result4_pep6['BW25113_1_6']),list(dia_result4_pep6['BW25113_2_6'])):
 x = float(x)
 y = float(y)
 if not np.isnan(x) and not np.isnan(y):  #if both have value
     list_temp.append(gmean(x,y))
 elif not np.isnan(x) or not np.isnan(y): #if only one sample have value
     if np.isnan(x):
         list_temp.append(y)
     elif np.isnan(y):
         list_temp.append(x)
 else:
     list_temp.append(0)
dia_result4_pep6['datasets'] =list_temp
dia_result4_pep6 = dia_result4_pep6[dia_result4_pep6['datasets']!=0]
# print len(dia_result4_pep6)
print len(dia_result4_pep6)
r=dia_result4_pep6['BW25113_1'].corr(dia_result4_pep6['BW25113_2'],method='pearson')
r2=r*r
print "dia_result4_pep6 r2 = ",r2
fname = outputdir+'\\dia_result4_pep6.csv'
dia_result4_pep6.to_csv(fname)
dia_result4_pep7.head()

#begin to calculate 
ratio_pd7 = dia_result4_pep7
ratio_pd7['OperonID'].count()
import collections
r_pd = collections.Counter(ratio_pd7['OperonID'])
o_pd = collections.Counter(operon_pd['OperonID'])
r_pd = pd.DataFrame(r_pd.values(),index=[int(i) for i in r_pd],columns=['operon_this'])
o_pd = pd.DataFrame(o_pd.values(),index=[int(i) for i in o_pd],columns=['operon_all'])

cc=r_pd[r_pd['operon_this']>=1]
dd=o_pd[o_pd['operon_all']>=1]

ratio_operon_pd = pd.merge(ratio_pd7,r_pd,left_on='OperonID', right_index=True)
ratio_operon_pd = pd.merge(ratio_operon_pd,o_pd,left_on='OperonID', right_index=True)
# ratio_operon_pd1
ratio_operon_pdx = ratio_operon_pd[ratio_operon_pd['operon_this']>1]
ratio_operon_pdx['lg_dataset'] = ratio_operon_pdx['datasets'].apply(lambda x:np.log2(x))
ratio_operon_pdx  = ratio_operon_pdx[ratio_operon_pdx['datasets']>0]

operon_num = 2
ratio_operon_pd1=drawpic1_2(operon_num)  #有>号的
ratio_operon_pd2=covert_newoperon(ratio_operon_pd1)   #
ratio_operon_pd2.head()


#draw Fig.2
plt.figure(figsize=(10,5))
plt.subplot(122)
new_pd,ratio_operon_pd2 = draw_all_random_sd_mean(ratio_operon_pdx) 

fname = outputdir+'\\ratio_operon_pd2.csv'
ratio_operon_pd2.to_csv(fname)
ratio_operon_pd2.head()

all_distrubution_draw_upanddown(new_pd)
#plt.xlim([-0.1,0.5])
a = new_pd[new_pd['group'] == 'Measured data']['sd/mean']
b = new_pd[new_pd['group'] == 'RD']['sd/mean']
ks,p=ks_2samp(a,b)
print ks,p
#ks

fmean = ratio_operon_pd2[['sd/mean','rd_sd/rd_mean']].mean()
fmedian = ratio_operon_pd2[['sd/mean','rd_sd/rd_mean']].median()

print 'ratio ',len(ratio_operon_pd2[ratio_operon_pd2['sd/mean']<fmedian[1]])/float(len(ratio_operon_pd2[ratio_operon_pd2['sd/mean']>0]))
fname=outputdir+'\\fig2.svg'
plt.savefig(fname)
fname=outputdir+'\\fig2.png'
plt.savefig(fname)
print fname
ratio_operon_pd2.head()

unique_list=new_pd['group'].unique()
a=new_pd[new_pd['group']==unique_list[0]]['sd/mean']
b=new_pd[new_pd['group']==unique_list[1]]['sd/mean'] 
ks,p=ks_2samp(a,b)
print ks,p


new_pd1 = ratio_operon_pd2[['sd/mean','rd_sd/rd_mean']]
new_pd1.describe()

A = new_pd1['sd/mean'].dropna().values
B = new_pd1['rd_sd/rd_mean'].dropna().values
print ttest_ind(A,B,equal_var=False)
print scipy.stats.kruskal(A,B)
print scipy.stats.mannwhitneyu(A,B)


##1. The results of HRM-MS compare with other protein quantification methods

ffile='g:\\SoftDownLoad\\201709_Ecoli\\ecoliwenxian1.csv'  #supplemary in Ar
ref_pd=pd.read_csv(ffile,index_col=0)
 
### 1.1 convert to copy number"
 
com_data_pd=pd.merge(ratio_operon_pdx,ref_pd,how='inner',left_on='Synonym',right_on='b-name3',right_index=True)
print len(com_data_pd)

com_data_pd_clean = com_data_pd[['datasets','lg_dataset','Average APEX copies/cell','Average iBAQ copies/cell','Average emPAI copies/cell']]

#mean calculate
com_data_pd_clean['average3']=com_data_pd_clean[['Average APEX copies/cell','Average iBAQ copies/cell','Average emPAI copies/cell']].mean(axis=1,skipna=False)

#gmean
com_data_pd_clean1=com_data_pd_clean.sort_index(by = 'average3',ascending=False)
com_data_pd_clean2= com_data_pd_clean1[com_data_pd_clean1['average3']>0]

len(com_data_pd_clean2)
com_data_pd_clean2.head()

gmean_data_average3 = com_data_pd_clean2['average3']
gmean_data_DIA = com_data_pd_clean2['datasets']
# gmean_data_of HRM-MS


geo_mean_average3 = stats.mstats.gmean(gmean_data_average3.values)
print 'geo_mean_average3 = ',geo_mean_average3

geo_mean_DIA = stats.mstats.gmean(gmean_data_DIA.values)
print 'geo_mean_HRM-MS = ',geo_mean_DIA

k=geo_mean_average3/geo_mean_DIA
print 'k = ',k

com_data_pd_clean1['DIA_cn'] = com_data_pd_clean1['datasets'].apply(lambda x: x*k)

DIA_7 = dia_result4_pep7[['Synonym','OperonID','Product','BW25113_1','BW25113_2','datasets']]
DIA_7['BW25113_1_cn']= DIA_7['BW25113_1'].apply(lambda x: x*k)
DIA_7['BW25113_2_cn']= DIA_7['BW25113_2'].apply(lambda x: x*k)
DIA_7['datasets_cn']= DIA_7['datasets'].apply(lambda x: x*k)
fname = outputdir+'\\DIA_7.csv'
DIA_7.to_csv(fname)

DIA_6 = dia_result4_pep6[['Synonym','OperonID','Product','BW25113_1_6','BW25113_2_6','datasets']]
DIA_6['BW25113_1_cn']= DIA_6['BW25113_1_6'].apply(lambda x: x*k)
DIA_6['BW25113_2_cn']= DIA_6['BW25113_2_6'].apply(lambda x: x*k)
DIA_6['datasets_cn']= DIA_6['datasets'].apply(lambda x: x*k)
fname = outputdir+'\\DIA_6.csv'
DIA_6.to_csv(fname)

print len(DIA_7),len(DIA_6)
draw_corrlation()

#venn pic of Fig1.A 

a = set( list(DIA_6[DIA_6['BW25113_1_cn'].notnull()].index) )
b = set( list(DIA_6[DIA_6['BW25113_2_cn'].notnull()].index) )
venn2(  [a  , b]  )

a = set( list(DIA_7[DIA_7['BW25113_1_cn'].notnull()].index) )
b = set( list(DIA_7[DIA_7['BW25113_2_cn'].notnull()].index) )
venn2(  [a  , b]  )


data_pd = com_data_pd_clean1[['Average APEX copies/cell','Average iBAQ copies/cell','Average emPAI copies/cell','DIA_cn']]
data_pd.columns=['APEX','iBAQ','emPAI','DIA']
data_pd=data_pd[['DIA','APEX','iBAQ','emPAI']]
data_pd=data_pd.dropna()
data_pd1=pd.DataFrame()
for i in data_pd:
    data_pd1[i]=data_pd[i].apply(lambda x :np.log(x))
data_pd1.describe()

### Weaker control accompany with operon  length increase"
operon_exp_temp = ratio_operon_pd2[ratio_operon_pd2['operon_this']>1]
def xx(x):
    if x>=5:
        y='>=5'
    else:
        y=x
    return y
operon_exp_temp['operon_all>=5']=operon_exp_temp['operon_all'].apply(xx)  #蛋白数目>5的统称>=5
print 'operon_exp_temp',len(operon_exp_temp)
operon_exp_temp.head()

#  Draw Fig 3A
def xx(x):
    if x>=5:
        y=5
    else:
        y=x
    return y

new_pd = pd.DataFrame(list(operon_exp_temp[['sd/mean','operon_all>=5']].values)+                      (list(operon_exp_temp[['rd_sd/rd_mean','group2']].values)),columns=['sd/mean','operon_all>=5'])
new_pd.head()

regr = linear_model.LinearRegression()
new_pd_for_lr =  new_pd[new_pd['operon_all>=5']!='RD']
new_pd_for_lr['operon_all>=5'] =new_pd_for_lr['operon_all>=5'].apply(xx) 

y = new_pd_for_lr['sd/mean']
x = new_pd_for_lr['operon_all>=5']

regr.fit(x.reshape(-1, 1), y) 

a, b = regr.coef_, regr.intercept_

print a,b
print stats.coef_pval(regr, x.reshape(-1, 1), y)
sns.set_style("ticks")

plt.figure(figsize=(6,6))
plt.subplot(111)

sns.swarmplot(x='operon_all>=5',y='sd/mean',data=new_pd, color="black", alpha=.7,size=3,order=[2,3,4,'>=5','RD'])
sns.boxplot  (x='operon_all>=5',y='sd/mean',data=new_pd ,color="gray",linewidth=2,width=0.6,order=[2,3,4,'>=5','RD'])  #   inner : {{\"box\", \"quartile\", \"point\", \"stick\", None}},
plt.plot([1,4], [a*(1)+b,a*4+b], color='red', linewidth=2)

plt.xticks(rotation=0,size=15)
plt.ylim([0,0.25])
plt.ylabel('Protein variation, CV')
plt.xlabel('Gene numbers contained in one operon')
text = 'y='+ str(round(a,4))+'*x' + '+' + str(round(b,4))
plt.text(1, .25, text)
ax = plt.gca()
ax.spines['top'].set_visible(False) 
ax.spines['right'].set_visible(False) 
fname = outputdir+'\\all2345.csv'
new_pd_for_lr.to_csv(fname)
fname = outputdir+'\\all2345.svg'
plt.savefig(fname)

new_pd_forreg = pd.DataFrame(list(operon_exp_temp[['sd/mean','operon_all>=5','C/P']].values),columns=['sd/mean','operon_all>=5','C/P'])
def xx(x):
    if x>=5:
        y=5
    else:
        y=x
    return y
new_pd_forreg['operon_all>=5'] = new_pd_forreg['operon_all>=5'].apply(xx)  

#  Draw Fig 3B

# for pathway group
regr = linear_model.LinearRegression()

new_pd_forreg_P = new_pd_forreg[new_pd_forreg['C/P']=='P']
y = new_pd_forreg_P['sd/mean']
x = new_pd_forreg_P['operon_all>=5']

regr.fit(x.reshape(-1, 1), y)
a, b = regr.coef_, regr.intercept_
print a,b
sns.set_style("ticks")
plt.figure(figsize=(5,5))
sns.swarmplot(x='operon_all>=5',y='sd/mean',data=new_pd_forreg_P, color="black", alpha=.7,size=3)
sns.boxplot  (x='operon_all>=5',y='sd/mean',data=new_pd_forreg_P,color="lightgray",linewidth=2,width=0.5) 
plt.plot([1,4], [a*(1)+b,a*4+b], color='red', linewidth=2)
plt.xticks(rotation=0,size=16)
plt.ylim([0,0.25])
plt.ylabel('Protein variation, CV')
plt.xlabel('Gene numbers contained in one operon')
text = 'y='+ str(round(a,4))+'*x' + '+' + str(round(b,4))
plt.text(1, .25, text)

ax = plt.gca() 
ax.spines['top'].set_visible(False)  
ax.spines['right'].set_visible(False) 

fname = outputdir+'\\'+ 'fitline_Pathway.svg'
plt.savefig(fname,dpi =600)
fname =outputdir+'\\'+ 'fitline_Pathway.csv'
new_pd_forreg_P.to_csv(fname)

#------for complex group
regr = linear_model.LinearRegression()

new_pd_forreg_C = new_pd_forreg[new_pd_forreg['C/P']=='C']
y = new_pd_forreg_C['sd/mean']
x = new_pd_forreg_C['operon_all>=5']

regr.fit(x.reshape(-1, 1), y)
a, b = regr.coef_, regr.intercept_
print a,b

sns.set_style("ticks")
plt.figure(figsize=(5,5))
sns.swarmplot(x='operon_all>=5',y='sd/mean',data=new_pd_forreg_C, color="black", alpha=.7,size=3)
sns.boxplot  (x='operon_all>=5',y='sd/mean',data=new_pd_forreg_C,color="lightgray",linewidth=2,width=0.5)
plt.plot([1,4], [a*(1)+b,a*4+b], color='red', linewidth=2)
plt.xticks(rotation=0,size=16)
plt.ylim([0,0.25])
plt.ylabel('Protein variation, CV')
plt.xlabel('Gene numbers contained in one operon')
text = 'y='+ str(round(a,4))+'*x' + '+' + str(round(b,4))
plt.text(1, .25, text)
ax = plt.gca() 
ax.spines['top'].set_visible(False)  
ax.spines['right'].set_visible(False) 

fname = outputdir+'\\'+ 'fitline_Complex.svg'
plt.savefig(fname,dpi =600)
fname =outputdir+'\\'+ 'fitline_Complex.csv'
new_pd_forreg_C.to_csv(fname)


# In[491]:
# p value of comparision among CV distribution in multigene operons 
tp_list=[]
for i in [2,3,4,'>=5','Random \nassortment data']:
    for j in [2,3,4,'>=5','Random \nassortment data']:
        if i!=j:  
            a = new_pd['operon_all>=5'] == i
            b = new_pd['operon_all>=5'] == j
            t,t_p=ttest_ind(a,b) 
            tp_list.append([i,j,round(t,10),t_p/2])   #Divided by 2, that's about the same thing as the one-tailed test
#             ks,ks_p=ks_2samp(a,b)
#             ks,mwu_p = scipy.stats.mannwhitneyu(a,b)
#             tp_list.append([i,j,round(ks,10),mwu_p])
    #         print i,j,t,p
tp_pd=pd.DataFrame(tp_list,columns=['a','b','t','t_p'])
#choose the ones p<0.05
tp_pd_out = tp_pd[tp_pd['t_p']<0.05]
fname = outputdir+'\\'+'tp_pd2345.csv'
tp_pd.to_csv(fname)


# In[492]:
# prepare the data for Figure 3 DE, GO
### 2.1 saprate the abundance of proteins in operon_exp_temp with self mean
  
def xx(x):
    if x>=5:
        y='>=5'
    else:
        y=x
    return y
    
ratio_operon_pdx['operon_all>=5']=ratio_operon_pdx['operon_all'].apply(xx)
ratio_operon_pdx.head()

#data for GO analysis in Fig3DE

for operon_num in [2,3,4,'>=5']:

    operon_exp_temp_selected = operon_exp_temp[ (operon_exp_temp['operon_all>=5'] == operon_num)&(operon_exp_temp['operon_this'] > 1) ]
    self_median = operon_exp_temp_selected['sd/mean'].median()  #
    print self_median
    operon_exp_temp_smaller = operon_exp_temp_selected[ operon_exp_temp_selected['sd/mean'] < self_median ]
    small_operonID = operon_exp_temp_smaller.index
    pd_data_smaller = ratio_operon_pdx[ratio_operon_pdx.OperonID.isin(small_operonID)]
    operon_exp_temp_larger = operon_exp_temp_selected[ operon_exp_temp_selected['sd/mean'] >= self_median ]
    larger_operonID = operon_exp_temp_larger.index
    pd_data_larger = ratio_operon_pdx[ratio_operon_pdx.OperonID.isin(larger_operonID)]

    smaller_gi_list = [str(i)+'\\n' for i in pd_data_smaller.index]
    larger_gi_list  = [str(i)+'\\n' for i in pd_data_larger.index]    
    
    if operon_num =='>=5':   
        operon_num = 'morethan_5'
    fname_smaller = os.path.join(outputdir,'self_smaller_gi_list_'+str(operon_num)+'.txt')
    fname_larger  = os.path.join(outputdir,'self_larger_gi_list_' +str(operon_num)+'.txt')
    with open(fname_smaller,'w') as f:
        f.writelines(smaller_gi_list)
    with open(fname_larger,'w') as f:
        f.writelines(larger_gi_list)
        
    print 'self_pd_data_smaller_selected', operon_num, len(pd_data_smaller)
    print 'self_pd_data_larger_selected', operon_num, len(pd_data_larger)

operon_num = 2   
ratio_operon_pd1=drawpic1_2(operon_num)
ratio_operon_pd1.head()


fname='g:\\SoftDownLoad\\201709_Ecoli\\split_ecoli_operon_1803.csv'
ratio_operon_pd.to_csv(fname)
operon_pda=[]
operon_pda = operon_exp_temp.copy()
operon_pda['OperonID'] = operon_pda.index
# alist
operon_pda.head()
def xx(x):
    if x>=5:
        y='>=5'
    else:
        y=x
    return y
    
operon_pda['operon_all>=5'] = operon_pda['operon_all'].apply(xx)

operon_pda['C/P']=operon_pda['C/P'].str.replace('C','Complex')
operon_pda['C/P']=operon_pda['C/P'].str.replace('P','Pathway')
operon_pd_join_real = operon_pda.copy()
operon_pd_join_rd = operon_pda.copy()

operon_pd_join_rd['C/P'] = operon_pd_join_rd['C/P'].apply(lambda x:'RD_'+str(x))
operon_combine = pd.DataFrame(list(operon_pd_join_real[['OperonID','sd/mean','operon_all>=5','C/P']].values)+(list(operon_pd_join_rd[['OperonID','rd_sd/rd_mean','operon_all>=5','C/P']].values)),columns=['OperonID','sd/mean','group','C/P'])

# supplemary figure S2 
nn = '1'
sns.set_style('white')  

plt.figure(figsize=(8,4))
plt.subplot(111)
sns.swarmplot(x='group',y='sd/mean',hue = 'C/P',data=operon_combine,color="black",  alpha=.7,size=3,order=[2,3,4,'>=5'],hue_order=['Complex','RD_Complex','Pathway','RD_Pathway'], split=True)
sns.boxplot  (x='group',y='sd/mean',hue = 'C/P',data=operon_combine, linewidth=1,width=0.8,order=[2,3,4,'>=5'], palette="Set3",hue_order=['Complex','RD_Complex','Pathway','RD_Pathway'])
plt.xticks(rotation=0,size=14)
plt.ylim([0,0.25])
plt.yticks(size = 14)
plt.ylabel('Protein variation, CV')
plt.xlabel('Gene numbers contained in one operon')
plt.legend('')
ax = plt.gca() 
ax.spines['top'].set_visible(False)  
ax.spines['right'].set_visible(False) 

fname = outputdir+'\\all_random_B'+ nn +'.svg'
plt.savefig(fname)
#  mwu test
mwu_list=[]

for i in ['Complex','Pathway','RD_Complex','RD_Pathway']:
    for j in [2,3,4,'>=5']:
        a = operon_combine[(operon_combine['group'] == j)&(operon_combine['C/P'] == i)]['sd/mean']
        for k in [2,3,4,'>=5']:
            b = operon_combine[(operon_combine['group'] == k)&(operon_combine['C/P'] == i)]['sd/mean']
            mwu,mwu_p = scipy.stats.mannwhitneyu(a,b)
            mwu_list.append([str(j),str(k),str(i),round(mwu,10),mwu_p])  

for i in [2,3,4,'>=5']:
    a = operon_combine[(operon_combine['group'] == i)&(operon_combine['C/P'] == 'Complex')]['sd/mean']
    b = operon_combine[(operon_combine['group'] == i)&(operon_combine['C/P'] == 'Pathway')]['sd/mean']
    mwu,mwu_p = scipy.stats.mannwhitneyu(a,b)
    mwu_list.append([str(i),str(i),'Complex_Pathway',round(mwu,10),mwu_p]) 
    
    a = operon_combine[(operon_combine['group'] == i)&(operon_combine['C/P'] == 'Complex')]['sd/mean']
    b = operon_combine[(operon_combine['group'] == i)&(operon_combine['C/P'] == 'RD_Complex')]['sd/mean']
    mwu,mwu_p = scipy.stats.mannwhitneyu(a,b)
    mwu_list.append([str(i),str(i),'Complex_RD_Complex',round(mwu,10),mwu_p])     
    
    a = operon_combine[(operon_combine['group'] == i)&(operon_combine['C/P'] == 'Pathway')]['sd/mean']
    b = operon_combine[(operon_combine['group'] == i)&(operon_combine['C/P'] == 'RD_Pathway')]['sd/mean']
    mwu,mwu_p = scipy.stats.mannwhitneyu(a,b)
    mwu_list.append([str(i),str(i),'Pathway_RD_Pathway',round(mwu,10),mwu_p])     
    
mwu_pd=pd.DataFrame(mwu_list,columns=['a','b','group','mwu','mwu_p'])       
# tp_pd_out = t_pd[t_pd['t_p']<0.05]
mwu_pd
fname= 'mwu_pd_B'+ nn +'.csv'
mwu_pd.to_csv(outputdir+'\\'+fname)
mwu_pd


heatmaplist=[[0,0,0,0,0],[0,0,0,0,0],[0,0,0,0,0],[0,0,0,0,0],[0,0,0,0,0]]

heatmaplist_cp = mwu_pd[mwu_pd['group'] == 'Complex'].pivot("a", "b", "mwu_p")
heatmaplist_pw = mwu_pd[mwu_pd['group'] == 'Pathway'].pivot("a", "b", "mwu_p")

### data and pic of Fig3C
# ### ttest of complexes and pathways 

t_list=[]
for i in ['Complex','Pathway','RD_Complex','RD_Pathway']:
    for j in [2,3,4,'>=5']:
        a = operon_combine[(operon_combine['group'] == j)&(operon_combine['C/P'] == i)]['sd/mean']
        for k in [2,3,4,'>=5']:
            b = operon_combine[(operon_combine['group'] == k)&(operon_combine['C/P'] == i)]['sd/mean']
            t,t_p=ttest_ind(a,b)
            t_list.append([str(j),str(k),str(i),round(t,10),t_p/2])  

for i in [2,3,4,'>=5','RD']:
    a = operon_combine[(operon_combine['group'] == i)&(operon_combine['C/P'] == 'Complex')]['sd/mean']
    b = operon_combine[(operon_combine['group'] == i)&(operon_combine['C/P'] == 'Pathway')]['sd/mean']
    t,t_p = ttest_ind(a,b)
    t_list.append([str(i),str(i),'Complex_Pathway',round(t,10),t_p/2])
    a = operon_combine[(operon_combine['group'] == i)&(operon_combine['C/P'] == 'Complex')]['sd/mean']
    b = operon_combine[(operon_combine['group'] == i)&(operon_combine['C/P'] == 'RD_Complex')]['sd/mean']
    t,t_p = ttest_ind(a,b)
    t_list.append([str(i),str(i),'Complex_Pathway',round(t,10),t_p/2])
    
    a = operon_combine[(operon_combine['group'] == i)&(operon_combine['C/P'] == 'Pathway')]['sd/mean']
    b = operon_combine[(operon_combine['group'] == i)&(operon_combine['C/P'] == 'RD_Pathway')]['sd/mean']
    t,t_p = ttest_ind(a,b)
    t_list.append([str(i),str(i),'Complex_Pathway',round(t,10),t_p/2])    

t_pd=pd.DataFrame(t_list,columns=['a','b','group','t','t_p'])

t_pd
fname= 'tu_pd.csv'
t_pd.to_csv(outputdir+'\\'+fname)


heatmaplist=[[0,0,0,0,0],[0,0,0,0,0],[0,0,0,0,0],[0,0,0,0,0],[0,0,0,0,0]]

heatmaplist_cp = t_pd[t_pd['group'] == 'Complex'].pivot("a", "b", "t_p")
heatmaplist_pw = t_pd[t_pd['group'] == 'Pathway'].pivot("a", "b", "t_p")

print heatmaplist
print heatmaplist_cp
print heatmaplist_pw

heatmaplist_1=np.array(heatmaplist_cp)
heatmaplist_1[np.triu_indices_from(heatmaplist_cp)] = True
heatmaplist_2=np.array(heatmaplist_pw)
heatmaplist_2[np.tril_indices_from(heatmaplist_pw)] = True

heatmaplist = heatmaplist_1+heatmaplist_2-1
heatmaplist

heatmaplist_log = -np.log10(heatmaplist)
heatmaplist_log

corr = heatmaplist_log
cmap = 'RdBu_r' #sns.cubehelix_palette(as_cmap=True, rot=-.3, light=1)
ax = sns.heatmap(corr, square=True,cmap=cmap, xticklabels=[2,3,4,'>=5'], yticklabels=[2,3,4,'>=5'],                 linewidths=0.5,vmin =-0.8, vmax =3 )
if 'BW' in outputdir:
    figname = 'heatmap_BW25113.svg'
elif 'MG' in outputdir:
    figname = 'heatmap_MG1655.svg'
plt.savefig(outputdir +'\\'+figname)

#formulas in this work

# $$cv = \frac{\sqrt[2]{\frac {\sum_{i=1}^n{(x_i-\bar{x})^2}}{n-1}}}{mean}\times 100\%$$

# $$k=\frac{\sqrt[n]{\prod_{i=0}^n\frac{(Bi+Pi+Ai)}{3}}}{\sqrt[n]{\prod_{i=0}^nDi}}$$ 

# $$Protein\ copy\ number = k\times{Di}$$
