# Supplementary material for: Multifaceted Stoichiometry Control of Bacterial Operons Revealed by Deep Proteome Quantification
Source: Front Genet. 2019 May 24;10:473. doi: 10.3389/fgene.2019.00473 (PMC6544118; doi:10.3389/fgene.2019.00473)
Supplement: FIGURE S1 — Physical and chemical features of quantified and unquantified proteins in E. coli. Panels (A–D) are distributions of protein isoelectric point, instability, protein length, and hydrophobicity. Instability tests a protein for stability, which value above 40 means the protein has a shorter half-life. The Kolmogorov–Smirnov test (KS-test) was used to test the distribution between quantified and unquantified proteins. Significance different were found between quantified and unquantified proteins indicated different physical–chemical characterizations of them. [file Data_Sheet_1.zip › Supplementary table S1 DIA MSMS isolation windows Table.xlsx]

## Sheet: 150MINMass List Table_ZJ
m/z	z	t start (min)	t stop (min)	Name	Isolation Window (m/z)
405.5	3	0	150		11
416.5	3	0	150		11
428	3	0	150		12
439.5	3	0	150		11
450	3	0	150		10
161	3	0	150		12
472.5	3	0	150		11
482.5	3	0	150		9
490.5	3	0	150		7
499.5	3	0	150		11
510	3	0	150		10
520.5	3	0	150		11
531.5	3	0	150		11
542	3	0	150		10
552.5	3	0	150		11
563	3	0	150		10
575	3	0	150		14
588	3	0	150		12
599	3	0	150		10
611	3	0	150		14
624	3	0	150		12
636	3	0	150		12
649.5	3	0	150		15
664	3	0	150		14
678.5	3	0	150		15
692.5	3	0	150		13
707.5	3	0	150		17
724.5	3	0	150		17
742	3	0	150		18
761	3	0	150		20
780.5	3	0	150		19
801	3	0	150		22
826	3	0	150		28
852.5	3	0	150		25
881.5	3	0	150		33
918.5	3	0	150		41
962.5	2	0	150		47
1018.5	2	0	150		65
1095	2	0	150		88
1164.5	2	0	150		71
