# Supplementary material for: Multifaceted Stoichiometry Control of Bacterial Operons Revealed by Deep Proteome Quantification
Source: Front Genet. 2019 May 24;10:473. doi: 10.3389/fgene.2019.00473 (PMC6544118; doi:10.3389/fgene.2019.00473)
Supplement: FIGURE S1 — Physical and chemical features of quantified and unquantified proteins in E. coli. Panels (A–D) are distributions of protein isoelectric point, instability, protein length, and hydrophobicity. Instability tests a protein for stability, which value above 40 means the protein has a shorter half-life. The Kolmogorov–Smirnov test (KS-test) was used to test the distribution between quantified and unquantified proteins. Significance different were found between quantified and unquantified proteins indicated different physical–chemical characterizations of them. [file Data_Sheet_1.zip › Supplementary table S2 Spectral Library.xlsx]

## Sheet: BW25113
PrecursorCharge	IntModifiedPeptide	ModifiedPeptide	StrippedPeptide	iRT	BGSInferenceId	IsProteotypic	LabeledPeptide	PrecursorMz	FragmentLossType	FragmentNumber	FragmentType	FragmentCharge	FragmentMz	RelativeIntensity	ExcludeFromAssay	Database	ProteinGroups	UniProtIds	Protein Name	ProteinDescription	Organisms	Genes	Protein Existence	Sequence Version	FASTAName	FASTAHeader
2	_ILNVSPR_	_ILNVSPR_	ILNVSPR	-4.63198	16128997 GI:16128997	TRUE	_ILNVSPR_	399.745	NH3	3	y	1	342.177	8.05266	FALSE	gi	16128997 GI:16128997	16128997 GI:16128997	ASAP:ABE-0003508|UniProtKB/Swiss-Prot:P75914|EcoGene:EG13870|GeneID:948477|						GCF_000005845.2_ASM584v2_genomic_29-OCT-2014 _iRT	>gi|16128997 GI:16128997|ASAP:ABE-0003508|UniProtKB/Swiss-Prot:P75914|EcoGene:EG13870|GeneID:948477|
2	_ILNVSPR_	_ILNVSPR_	ILNVSPR	-4.63198	16128997 GI:16128997	TRUE	_ILNVSPR_	399.745	noloss	3	y	1	359.204	15.6164	FALSE	gi	16128997 GI:16128997	16128997 GI:16128997	ASAP:ABE-0003508|UniProtKB/Swiss-Prot:P75914|EcoGene:EG13870|GeneID:948477|						GCF_000005845.2_ASM584v2_genomic_29-OCT-2014 _iRT	>gi|16128997 GI:16128997|ASAP:ABE-0003508|UniProtKB/Swiss-Prot:P75914|EcoGene:EG13870|GeneID:948477|
2	_ILNVSPR_	_ILNVSPR_	ILNVSPR	-4.63198	16128997 GI:16128997	TRUE	_ILNVSPR_	399.745	noloss	4	y	1	458.272	17.2659	FALSE	gi	16128997 GI:16128997	16128997 GI:16128997	ASAP:ABE-0003508|UniProtKB/Swiss-Prot:P75914|EcoGene:EG13870|GeneID:948477|						GCF_000005845.2_ASM584v2_genomic_29-OCT-2014 _iRT	>gi|16128997 GI:16128997|ASAP:ABE-0003508|UniProtKB/Swiss-Prot:P75914|EcoGene:EG13870|GeneID:948477|
2	_ILNVSPR_	_ILNVSPR_	ILNVSPR	-4.63198	16128997 GI:16128997	TRUE	_ILNVSPR_	399.745	NH3	5	y	1	555.289	11.6482	FALSE	gi	16128997 GI:16128997	16128997 GI:16128997	ASAP:ABE-0003508|UniProtKB/Swiss-Prot:P75914|EcoGene:EG13870|GeneID:948477|						GCF_000005845.2_ASM584v2_genomic_29-OCT-2014 _iRT	>gi|16128997 GI:16128997|ASAP:ABE-0003508|UniProtKB/Swiss-Prot:P75914|EcoGene:EG13870|GeneID:948477|
2	_ILNVSPR_	_ILNVSPR_	ILNVSPR	-4.63198	16128997 GI:16128997	TRUE	_ILNVSPR_	399.745	noloss	5	y	1	572.315	100	FALSE	gi	16128997 GI:16128997	16128997 GI:16128997	ASAP:ABE-0003508|UniProtKB/Swiss-Prot:P75914|EcoGene:EG13870|GeneID:948477|						GCF_000005845.2_ASM584v2_genomic_29-OCT-2014 _iRT	>gi|16128997 GI:16128997|ASAP:ABE-0003508|UniProtKB/Swiss-Prot:P75914|EcoGene:EG13870|GeneID:948477|
2	_ILNVSPR_	_ILNVSPR_	ILNVSPR	-4.63198	16128997 GI:16128997	TRUE	_ILNVSPR_	399.745	noloss	6	y	1	685.399	34.5113	FALSE	gi	16128997 GI:16128997	16128997 GI:16128997	ASAP:ABE-0003508|UniProtKB/Swiss-Prot:P75914|EcoGene:EG13870|GeneID:948477|						GCF_000005845.2_ASM584v2_genomic_29-OCT-2014 _iRT	>gi|16128997 GI:16128997|ASAP:ABE-0003508|UniProtKB/Swiss-Prot:P75914|EcoGene:EG13870|GeneID:948477|
2	_DNAAIAPK_	_DNAAIAPK_	DNAAIAPK	-36.3688	16131305 GI:16131305	TRUE	_DNAAIAPK_	400.219	noloss	3	b	1	301.114	55.5727	FALSE	gi	16131305 GI:16131305	16131305 GI:16131305	ASAP:ABE-0011206|UniProtKB/Swiss-Prot:P15067|EcoGene:EG10381|GeneID:947941|						GCF_000005845.2_ASM584v2_genomic_29-OCT-2014 _iRT	>gi|16131305 GI:16131305|ASAP:ABE-0011206|UniProtKB/Swiss-Prot:P15067|EcoGene:EG10381|GeneID:947941|
2	_DNAAIAPK_	_DNAAIAPK_	DNAAIAPK	-36.3688	16131305 GI:16131305	TRUE	_DNAAIAPK_	400.219	noloss	3	y	1	315.203	100	FALSE	gi	16131305 GI:16131305	16131305 GI:16131305	ASAP:ABE-0011206|UniProtKB/Swiss-Prot:P15067|EcoGene:EG10381|GeneID:947941|						GCF_000005845.2_ASM584v2_genomic_29-OCT-2014 _iRT	>gi|16131305 GI:16131305|ASAP:ABE-0011206|UniProtKB/Swiss-Prot:P15067|EcoGene:EG10381|GeneID:947941|
2	_DNAAIAPK_	_DNAAIAPK_	DNAAIAPK	-36.3688	16131305 GI:16131305	TRUE	_DNAAIAPK_	400.219	H2O	4	b	1	354.141	7.05376	TRUE	gi	16131305 GI:16131305	16131305 GI:16131305	ASAP:ABE-0011206|UniProtKB/Swiss-Prot:P15067|EcoGene:EG10381|GeneID:947941|						GCF_000005845.2_ASM584v2_genomic_29-OCT-2014 _iRT	>gi|16131305 GI:16131305|ASAP:ABE-0011206|UniProtKB/Swiss-Prot:P15067|EcoGene:EG10381|GeneID:947941|
2	_DNAAIAPK_	_DNAAIAPK_	DNAAIAPK	-36.3688	16131305 GI:16131305	TRUE	_DNAAIAPK_	400.219	NH3	4	b	1	355.125	25.3759	FALSE	gi	16131305 GI:16131305	16131305 GI:16131305	ASAP:ABE-0011206|UniProtKB/Swiss-Prot:P15067|EcoGene:EG10381|GeneID:947941|						GCF_000005845.2_ASM584v2_genomic_29-OCT-2014 _iRT	>gi|16131305 GI:16131305|ASAP:ABE-0011206|UniProtKB/Swiss-Prot:P15067|EcoGene:EG10381|GeneID:947941|
2	_DNAAIAPK_	_DNAAIAPK_	DNAAIAPK	-36.3688	16131305 GI:16131305	TRUE	_DNAAIAPK_	400.219	noloss	4	b	1	372.151	21.1515	TRUE	gi	16131305 GI:16131305	16131305 GI:16131305	ASAP:ABE-0011206|UniProtKB/Swiss-Prot:P15067|EcoGene:EG10381|GeneID:947941|						GCF_000005845.2_ASM584v2_genomic_29-OCT-2014 _iRT	>gi|16131305 GI:16131305|ASAP:ABE-0011206|UniProtKB/Swiss-Prot:P15067|EcoGene:EG10381|GeneID:947941|
2	_DNAAIAPK_	_DNAAIAPK_	DNAAIAPK	-36.3688	16131305 GI:16131305	TRUE	_DNAAIAPK_	400.219	noloss	4	y	1	428.287	45.614	FALSE	gi	16131305 GI:16131305	16131305 GI:16131305	ASAP:ABE-0011206|UniProtKB/Swiss-Prot:P15067|EcoGene:EG10381|GeneID:947941|						GCF_000005845.2_ASM584v2_genomic_29-OCT-2014 _iRT	>gi|16131305 GI:16131305|ASAP:ABE-0011206|UniProtKB/Swiss-Prot:P15067|EcoGene:EG10381|GeneID:947941|
2	_DNAAIAPK_	_DNAAIAPK_	DNAAIAPK	-36.3688	16131305 GI:16131305	TRUE	_DNAAIAPK_	400.219	noloss	5	y	1	499.324	38.4243	FALSE	gi	16131305 GI:16131305	16131305 GI:16131305	ASAP:ABE-0011206|UniProtKB/Swiss-Prot:P15067|EcoGene:EG10381|GeneID:947941|						GCF_000005845.2_ASM584v2_genomic_29-OCT-2014 _iRT	>gi|16131305 GI:16131305|ASAP:ABE-0011206|UniProtKB/Swiss-Prot:P15067|EcoGene:EG10381|GeneID:947941|
2	_DNAAIAPK_	_DNAAIAPK_	DNAAIAPK	-36.3688	16131305 GI:16131305	TRUE	_DNAAIAPK_	400.219	noloss	6	y	1	570.361	35.2608	FALSE	gi	16131305 GI:16131305	16131305 GI:16131305	ASAP:ABE-0011206|UniProtKB/Swiss-Prot:P15067|EcoGene:EG10381|GeneID:947941|						GCF_000005845.2_ASM584v2_genomic_29-OCT-2014 _iRT	>gi|16131305 GI:16131305|ASAP:ABE-0011206|UniProtKB/Swiss-Prot:P15067|EcoGene:EG10381|GeneID:947941|
2	_DNAAIAPK_	_DNAAIAPK_	DNAAIAPK	-36.3688	16131305 GI:16131305	TRUE	_DNAAIAPK_	400.219	NH3	7	b	1	636.299	8.74184	TRUE	gi	16131305 GI:16131305	16131305 GI:16131305	ASAP:ABE-0011206|UniProtKB/Swiss-Prot:P15067|EcoGene:EG10381|GeneID:947941|						GCF_000005845.2_ASM584v2_genomic_29-OCT-2014 _iRT	>gi|16131305 GI:16131305|ASAP:ABE-0011206|UniProtKB/Swiss-Prot:P15067|EcoGene:EG10381|GeneID:947941|
2	_DNAAIAPK_	_DNAAIAPK_	DNAAIAPK	-36.3688	16131305 GI:16131305	TRUE	_DNAAIAPK_	400.219	noloss	7	b	1	653.325	9.93855	TRUE	gi	16131305 GI:16131305	16131305 GI:16131305	ASAP:ABE-0011206|UniProtKB/Swiss-Prot:P15067|EcoGene:EG10381|GeneID:947941|						GCF_000005845.2_ASM584v2_genomic_29-OCT-2014 _iRT	>gi|16131305 GI:16131305|ASAP:ABE-0011206|UniProtKB/Swiss-Prot:P15067|EcoGene:EG10381|GeneID:947941|
2	_DNAAIAPK_	_DNAAIAPK_	DNAAIAPK	-36.3688	16131305 GI:16131305	TRUE	_DNAAIAPK_	400.219	H2O	7	b	1	635.315	6.72608	TRUE	gi	16131305 GI:16131305	16131305 GI:16131305	ASAP:ABE-0011206|UniProtKB/Swiss-Prot:P15067|EcoGene:EG10381|GeneID:947941|						GCF_000005845.2_ASM584v2_genomic_29-OCT-2014 _iRT	>gi|16131305 GI:16131305|ASAP:ABE-0011206|UniProtKB/Swiss-Prot:P15067|EcoGene:EG10381|GeneID:947941|
2	_QLQLIGK_	_QLQLIGK_	QLQLIGK	7.81729	16132056 GI:16132056	TRUE	_QLQLIGK_	400.255	noloss	3	y	1	317.218	78.766	FALSE	gi	16132056 GI:16132056	16132056 GI:16132056	ASAP:ABE-0013850|UniProtKB/Swiss-Prot:P0A8X0|EcoGene:EG11410|GeneID:948751|						GCF_000005845.2_ASM584v2_genomic_29-OCT-2014 _iRT	>gi|16132056 GI:16132056|ASAP:ABE-0013850|UniProtKB/Swiss-Prot:P0A8X0|EcoGene:EG11410|GeneID:948751|
2	_QLQLIGK_	_QLQLIGK_	QLQLIGK	7.81729	16132056 GI:16132056	TRUE	_QLQLIGK_	400.255	noloss	6	b	2	327.203	23.7942	TRUE	gi	16132056 GI:16132056	16132056 GI:16132056	ASAP:ABE-0013850|UniProtKB/Swiss-Prot:P0A8X0|EcoGene:EG11410|GeneID:948751|						GCF_000005845.2_ASM584v2_genomic_29-OCT-2014 _iRT	>gi|16132056 GI:16132056|ASAP:ABE-0013850|UniProtKB/Swiss-Prot:P0A8X0|EcoGene:EG11410|GeneID:948751|
2	_QLQLIGK_	_QLQLIGK_	QLQLIGK	7.81729	16132056 GI:16132056	TRUE	_QLQLIGK_	400.255	H2O	3	b	1	352.198	67.0526	FALSE	gi	16132056 GI:16132056	16132056 GI:16132056	ASAP:ABE-0013850|UniProtKB/Swiss-Prot:P0A8X0|EcoGene:EG11410|GeneID:948751|						GCF_000005845.2_ASM584v2_genomic_29-OCT-2014 _iRT	>gi|16132056 GI:16132056|ASAP:ABE-0013850|UniProtKB/Swiss-Prot:P0A8X0|EcoGene:EG11410|GeneID:948751|
2	_QLQLIGK_	_QLQLIGK_	QLQLIGK	7.81729	16132056 GI:16132056	TRUE	_QLQLIGK_	400.255	NH3	3	b	1	353.182	100	FALSE	gi	16132056 GI:16132056	16132056 GI:16132056	ASAP:ABE-0013850|UniProtKB/Swiss-Prot:P0A8X0|EcoGene:EG11410|GeneID:948751|						GCF_000005845.2_ASM584v2_genomic_29-OCT-2014 _iRT	>gi|16132056 GI:16132056|ASAP:ABE-0013850|UniProtKB/Swiss-Prot:P0A8X0|EcoGene:EG11410|GeneID:948751|
2	_QLQLIGK_	_QLQLIGK_	QLQLIGK	7.81729	16132056 GI:16132056	TRUE	_QLQLIGK_	400.255	noloss	3	b	1	370.208	7.35612	TRUE	gi	16132056 GI:16132056	16132056 GI:16132056	ASAP:ABE-0013850|UniProtKB/Swiss-Prot:P0A8X0|EcoGene:EG11410|GeneID:948751|						GCF_000005845.2_ASM584v2_genomic_29-OCT-2014 _iRT	>gi|16132056 GI:16132056|ASAP:ABE-0013850|UniProtKB/Swiss-Prot:P0A8X0|EcoGene:EG11410|GeneID:948751|
2	_QLQLIGK_	_QLQLIGK_	QLQLIGK	7.81729	16132056 GI:16132056	TRUE	_QLQLIGK_	400.255	noloss	4	y	1	430.302	38.6419	FALSE	gi	16132056 GI:16132056	16132056 GI:16132056	ASAP:ABE-0013850|UniProtKB/Swiss-Prot:P0A8X0|EcoGene:EG11410|GeneID:948751|						GCF_000005845.2_ASM584v2_genomic_29-OCT-2014 _iRT	>gi|16132056 GI:16132056|ASAP:ABE-0013850|UniProtKB/Swiss-Prot:P0A8X0|EcoGene:EG11410|GeneID:948751|
2	_QLQLIGK_	_QLQLIGK_	QLQLIGK	7.81729	16132056 GI:16132056	TRUE	_QLQLIGK_	400.255	H2O	4	b	1	465.282	49.1267	FALSE	gi	16132056 GI:16132056	16132056 GI:16132056	ASAP:ABE-0013850|UniProtKB/Swiss-Prot:P0A8X0|EcoGene:EG11410|GeneID:948751|						GCF_000005845.2_ASM584v2_genomic_29-OCT-2014 _iRT	>gi|16132056 GI:16132056|ASAP:ABE-0013850|UniProtKB/Swiss-Prot:P0A8X0|EcoGene:EG11410|GeneID:948751|
2	_QLQLIGK_	_QLQLIGK_	QLQLIGK	7.81729	16132056 GI:16132056	TRUE	_QLQLIGK_	400.255	NH3	4	b	1	466.266	8.39547	TRUE	gi	16132056 GI:16132056	16132056 GI:16132056	ASAP:ABE-0013850|UniProtKB/Swiss-Prot:P0A8X0|EcoGene:EG11410|GeneID:948751|						GCF_000005845.2_ASM584v2_genomic_29-OCT-2014 _iRT	>gi|16132056 GI:16132056|ASAP:ABE-0013850|UniProtKB/Swiss-Prot:P0A8X0|EcoGene:EG11410|GeneID:948751|
2	_QLQLIGK_	_QLQLIGK_	QLQLIGK	7.81729	16132056 GI:16132056	TRUE	_QLQLIGK_	400.255	H2O	5	y	1	540.35	11.4459	TRUE	gi	16132056 GI:16132056	16132056 GI:16132056	ASAP:ABE-0013850|UniProtKB/Swiss-Prot:P0A8X0|EcoGene:EG11410|GeneID:948751|						GCF_000005845.2_ASM584v2_genomic_29-OCT-2014 _iRT	>gi|16132056 GI:16132056|ASAP:ABE-0013850|UniProtKB/Swiss-Prot:P0A8X0|EcoGene:EG11410|GeneID:948751|
2	_QLQLIGK_	_QLQLIGK_	QLQLIGK	7.81729	16132056 GI:16132056	TRUE	_QLQLIGK_	400.255	NH3	5	y	1	541.334	49.3306	FALSE	gi	16132056 GI:16132056	16132056 GI:16132056	ASAP:ABE-0013850|UniProtKB/Swiss-Prot:P0A8X0|EcoGene:EG11410|GeneID:948751|						GCF_000005845.2_ASM584v2_genomic_29-OCT-2014 _iRT	>gi|16132056 GI:16132056|ASAP:ABE-0013850|UniProtKB/Swiss-Prot:P0A8X0|EcoGene:EG11410|GeneID:948751|
2	_QLQLIGK_	_QLQLIGK_	QLQLIGK	7.81729	16132056 GI:16132056	TRUE	_QLQLIGK_	400.255	noloss	5	y	1	558.361	16.528	TRUE	gi	16132056 GI:16132056	16132056 GI:16132056	ASAP:ABE-0013850|UniProtKB/Swiss-Prot:P0A8X0|EcoGene:EG11410|GeneID:948751|						GCF_000005845.2_ASM584v2_genomic_29-OCT-2014 _iRT	>gi|16132056 GI:16132056|ASAP:ABE-0013850|UniProtKB/Swiss-Prot:P0A8X0|EcoGene:EG11410|GeneID:948751|
2	_QLQLIGK_	_QLQLIGK_	QLQLIGK	7.81729	16132056 GI:16132056	TRUE	_QLQLIGK_	400.255	H2O	5	b	1	578.366	11.9263	TRUE	gi	16132056 GI:16132056	16132056 GI:16132056	ASAP:ABE-0013850|UniProtKB/Swiss-Prot:P0A8X0|EcoGene:EG11410|GeneID:948751|						GCF_000005845.2_ASM584v2_genomic_29-OCT-2014 _iRT	>gi|16132056 GI:16132056|ASAP:ABE-0013850|UniProtKB/Swiss-Prot:P0A8X0|EcoGene:EG11410|GeneID:948751|
2	_QLQLIGK_	_QLQLIGK_	QLQLIGK	7.81729	16132056 GI:16132056	TRUE	_QLQLIGK_	400.255	noloss	6	y	1	671.445	6.66579	TRUE	gi	16132056 GI:16132056	16132056 GI:16132056	ASAP:ABE-0013850|UniProtKB/Swiss-Prot:P0A8X0|EcoGene:EG11410|GeneID:948751|						GCF_000005845.2_ASM584v2_genomic_29-OCT-2014 _iRT	>gi|16132056 GI:16132056|ASAP:ABE-0013850|UniProtKB/Swiss-Prot:P0A8X0|EcoGene:EG11410|GeneID:948751|
2	_IAIEQAR_	_IAIEQAR_	IAIEQAR	-16.8174	16130513 GI:16130513	TRUE	_IAIEQAR_	400.735	H2O	3	y	1	356.204	10.7524	TRUE	gi	16130513 GI:16130513	16130513 GI:16130513	ASAP:ABE-0008527|UniProtKB/Swiss-Prot:P63284|EcoGene:EG10157|GeneID:947077|						GCF_000005845.2_ASM584v2_genomic_29-OCT-2014 _iRT	>gi|16130513 GI:16130513|ASAP:ABE-0008527|UniProtKB/Swiss-Prot:P63284|EcoGene:EG10157|GeneID:947077|
2	_IAIEQAR_	_IAIEQAR_	IAIEQAR	-16.8174	16130513 GI:16130513	TRUE	_IAIEQAR_	400.735	NH3	3	y	1	357.188	13.102	FALSE	gi	16130513 GI:16130513	16130513 GI:16130513	ASAP:ABE-0008527|UniProtKB/Swiss-Prot:P63284|EcoGene:EG10157|GeneID:947077|						GCF_000005845.2_ASM584v2_genomic_29-OCT-2014 _iRT	>gi|16130513 GI:16130513|ASAP:ABE-0008527|UniProtKB/Swiss-Prot:P63284|EcoGene:EG10157|GeneID:947077|
2	_IAIEQAR_	_IAIEQAR_	IAIEQAR	-16.8174	16130513 GI:16130513	TRUE	_IAIEQAR_	400.735	noloss	3	y	1	374.215	31.3846	FALSE	gi	16130513 GI:16130513	16130513 GI:16130513	ASAP:ABE-0008527|UniProtKB/Swiss-Prot:P63284|EcoGene:EG10157|GeneID:947077|						GCF_000005845.2_ASM584v2_genomic_29-OCT-2014 _iRT	>gi|16130513 GI:16130513|ASAP:ABE-0008527|UniProtKB/Swiss-Prot:P63284|EcoGene:EG10157|GeneID:947077|
2	_IAIEQAR_	_IAIEQAR_	IAIEQAR	-16.8174	16130513 GI:16130513	TRUE	_IAIEQAR_	400.735	H2O	4	y	1	485.247	5.66558	TRUE	gi	16130513 GI:16130513	16130513 GI:16130513	ASAP:ABE-0008527|UniProtKB/Swiss-Prot:P63284|EcoGene:EG10157|GeneID:947077|						GCF_000005845.2_ASM584v2_genomic_29-OCT-2014 _iRT	>gi|16130513 GI:16130513|ASAP:ABE-0008527|UniProtKB/Swiss-Prot:P63284|EcoGene:EG10157|GeneID:947077|
2	_IAIEQAR_	_IAIEQAR_	IAIEQAR	-16.8174	16130513 GI:16130513	TRUE	_IAIEQAR_	400.735	NH3	4	y	1	486.231	12.905	FALSE	gi	16130513 GI:16130513	16130513 GI:16130513	ASAP:ABE-0008527|UniProtKB/Swiss-Prot:P63284|EcoGene:EG10157|GeneID:947077|						GCF_000005845.2_ASM584v2_genomic_29-OCT-2014 _iRT	>gi|16130513 GI:16130513|ASAP:ABE-0008527|UniProtKB/Swiss-Prot:P63284|EcoGene:EG10157|GeneID:947077|
2	_IAIEQAR_	_IAIEQAR_	IAIEQAR	-16.8174	16130513 GI:16130513	TRUE	_IAIEQAR_	400.735	noloss	4	y	1	503.257	57.8659	FALSE	gi	16130513 GI:16130513	16130513 GI:16130513	ASAP:ABE-0008527|UniProtKB/Swiss-Prot:P63284|EcoGene:EG10157|GeneID:947077|						GCF_000005845.2_ASM584v2_genomic_29-OCT-2014 _iRT	>gi|16130513 GI:16130513|ASAP:ABE-0008527|UniProtKB/Swiss-Prot:P63284|EcoGene:EG10157|GeneID:947077|
2	_IAIEQAR_	_IAIEQAR_	IAIEQAR	-16.8174	16130513 GI:16130513	TRUE	_IAIEQAR_	400.735	NH3	5	y	1	599.315	5.22665	TRUE	gi	16130513 GI:16130513	16130513 GI:16130513	ASAP:ABE-0008527|UniProtKB/Swiss-Prot:P63284|EcoGene:EG10157|GeneID:947077|						GCF_000005845.2_ASM584v2_genomic_29-OCT-2014 _iRT	>gi|16130513 GI:16130513|ASAP:ABE-0008527|UniProtKB/Swiss-Prot:P63284|EcoGene:EG10157|GeneID:947077|
2	_IAIEQAR_	_IAIEQAR_	IAIEQAR	-16.8174	16130513 GI:16130513	TRUE	_IAIEQAR_	400.735	noloss	5	y	1	616.341	100	FALSE	gi	16130513 GI:16130513	16130513 GI:16130513	ASAP:ABE-0008527|UniProtKB/Swiss-Prot:P63284|EcoGene:EG10157|GeneID:947077|						GCF_000005845.2_ASM584v2_genomic_29-OCT-2014 _iRT	>gi|16130513 GI:16130513|ASAP:ABE-0008527|UniProtKB/Swiss-Prot:P63284|EcoGene:EG10157|GeneID:947077|
2	_IAIEQAR_	_IAIEQAR_	IAIEQAR	-16.8174	16130513 GI:16130513	TRUE	_IAIEQAR_	400.735	noloss	6	y	1	687.378	92.9314	FALSE	gi	16130513 GI:16130513	16130513 GI:16130513	ASAP:ABE-0008527|UniProtKB/Swiss-Prot:P63284|EcoGene:EG10157|GeneID:947077|						GCF_000005845.2_ASM584v2_genomic_29-OCT-2014 _iRT	>gi|16130513 GI:16130513|ASAP:ABE-0008527|UniProtKB/Swiss-Prot:P63284|EcoGene:EG10157|GeneID:947077|
2	_QAVAVANK_	_QAVAVANK_	QAVAVANK	-47.7152	16131330 GI:16131330	FALSE	_QAVAVANK_	400.735	NH3	3	y	1	315.166	15.727	TRUE	gi	16131330 GI:16131330	16131330 GI:16131330	ASAP:ABE-0011292|UniProtKB/Swiss-Prot:P04816|EcoGene:EG10540|GeneID:947964|						GCF_000005845.2_ASM584v2_genomic_29-OCT-2014 _iRT	>gi|16131330 GI:16131330|ASAP:ABE-0011292|UniProtKB/Swiss-Prot:P04816|EcoGene:EG10540|GeneID:947964|
2	_QAVAVANK_	_QAVAVANK_	QAVAVANK	-47.7152	16131330 GI:16131330	FALSE	_QAVAVANK_	400.735	noloss	3	y	1	332.193	100	FALSE	gi	16131330 GI:16131330	16131330 GI:16131330	ASAP:ABE-0011292|UniProtKB/Swiss-Prot:P04816|EcoGene:EG10540|GeneID:947964|						GCF_000005845.2_ASM584v2_genomic_29-OCT-2014 _iRT	>gi|16131330 GI:16131330|ASAP:ABE-0011292|UniProtKB/Swiss-Prot:P04816|EcoGene:EG10540|GeneID:947964|
2	_QAVAVANK_	_QAVAVANK_	QAVAVANK	-47.7152	16131330 GI:16131330	FALSE	_QAVAVANK_	400.735	H2O	4	b	1	352.198	72.8496	FALSE	gi	16131330 GI:16131330	16131330 GI:16131330	ASAP:ABE-0011292|UniProtKB/Swiss-Prot:P04816|EcoGene:EG10540|GeneID:947964|						GCF_000005845.2_ASM584v2_genomic_29-OCT-2014 _iRT	>gi|16131330 GI:16131330|ASAP:ABE-0011292|UniProtKB/Swiss-Prot:P04816|EcoGene:EG10540|GeneID:947964|
2	_QAVAVANK_	_QAVAVANK_	QAVAVANK	-47.7152	16131330 GI:16131330	FALSE	_QAVAVANK_	400.735	noloss	4	y	1	431.261	61.129	FALSE	gi	16131330 GI:16131330	16131330 GI:16131330	ASAP:ABE-0011292|UniProtKB/Swiss-Prot:P04816|EcoGene:EG10540|GeneID:947964|						GCF_000005845.2_ASM584v2_genomic_29-OCT-2014 _iRT	>gi|16131330 GI:16131330|ASAP:ABE-0011292|UniProtKB/Swiss-Prot:P04816|EcoGene:EG10540|GeneID:947964|
2	_QAVAVANK_	_QAVAVANK_	QAVAVANK	-47.7152	16131330 GI:16131330	FALSE	_QAVAVANK_	400.735	H2O	5	b	1	451.266	49.0355	FALSE	gi	16131330 GI:16131330	16131330 GI:16131330	ASAP:ABE-0011292|UniProtKB/Swiss-Prot:P04816|EcoGene:EG10540|GeneID:947964|						GCF_000005845.2_ASM584v2_genomic_29-OCT-2014 _iRT	>gi|16131330 GI:16131330|ASAP:ABE-0011292|UniProtKB/Swiss-Prot:P04816|EcoGene:EG10540|GeneID:947964|
2	_QAVAVANK_	_QAVAVANK_	QAVAVANK	-47.7152	16131330 GI:16131330	FALSE	_QAVAVANK_	400.735	noloss	5	y	1	502.298	97.0891	FALSE	gi	16131330 GI:16131330	16131330 GI:16131330	ASAP:ABE-0011292|UniProtKB/Swiss-Prot:P04816|EcoGene:EG10540|GeneID:947964|						GCF_000005845.2_ASM584v2_genomic_29-OCT-2014 _iRT	>gi|16131330 GI:16131330|ASAP:ABE-0011292|UniProtKB/Swiss-Prot:P04816|EcoGene:EG10540|GeneID:947964|
2	_QAVAVANK_	_QAVAVANK_	QAVAVANK	-47.7152	16131330 GI:16131330	FALSE	_QAVAVANK_	400.735	H2O	6	b	1	522.303	27.8716	TRUE	gi	16131330 GI:16131330	16131330 GI:16131330	ASAP:ABE-0011292|UniProtKB/Swiss-Prot:P04816|EcoGene:EG10540|GeneID:947964|						GCF_000005845.2_ASM584v2_genomic_29-OCT-2014 _iRT	>gi|16131330 GI:16131330|ASAP:ABE-0011292|UniProtKB/Swiss-Prot:P04816|EcoGene:EG10540|GeneID:947964|
2	_QAVAVANK_	_QAVAVANK_	QAVAVANK	-47.7152	16131330 GI:16131330	FALSE	_QAVAVANK_	400.735	NH3	6	b	1	523.287	8.11457	TRUE	gi	16131330 GI:16131330	16131330 GI:16131330	ASAP:ABE-0011292|UniProtKB/Swiss-Prot:P04816|EcoGene:EG10540|GeneID:947964|						GCF_000005845.2_ASM584v2_genomic_29-OCT-2014 _iRT	>gi|16131330 GI:16131330|ASAP:ABE-0011292|UniProtKB/Swiss-Prot:P04816|EcoGene:EG10540|GeneID:947964|
2	_QAVAVANK_	_QAVAVANK_	QAVAVANK	-47.7152	16131330 GI:16131330	FALSE	_QAVAVANK_	400.735	NH3	7	b	1	637.33	11.6278	TRUE	gi	16131330 GI:16131330	16131330 GI:16131330	ASAP:ABE-0011292|UniProtKB/Swiss-Prot:P04816|EcoGene:EG10540|GeneID:947964|						GCF_000005845.2_ASM584v2_genomic_29-OCT-2014 _iRT	>gi|16131330 GI:16131330|ASAP:ABE-0011292|UniProtKB/Swiss-Prot:P04816|EcoGene:EG10540|GeneID:947964|
2	_QAVAVANK_	_QAVAVANK_	QAVAVANK	-47.7152	16131330 GI:16131330	FALSE	_QAVAVANK_	400.735	NH3	4	b	1	353.182	37.8437	TRUE	gi	16131330 GI:16131330	16131330 GI:16131330	ASAP:ABE-0011292|UniProtKB/Swiss-Prot:P04816|EcoGene:EG10540|GeneID:947964|						GCF_000005845.2_ASM584v2_genomic_29-OCT-2014 _iRT	>gi|16131330 GI:16131330|ASAP:ABE-0011292|UniProtKB/Swiss-Prot:P04816|EcoGene:EG10540|GeneID:947964|
2	_QAVAVANK_	_QAVAVANK_	QAVAVANK	-47.7152	16131330 GI:16131330	FALSE	_QAVAVANK_	400.735	NH3	4	y	1	414.235	5.52456	TRUE	gi	16131330 GI:16131330	16131330 GI:16131330	ASAP:ABE-0011292|UniProtKB/Swiss-Prot:P04816|EcoGene:EG10540|GeneID:947964|						GCF_000005845.2_ASM584v2_genomic_29-OCT-2014 _iRT	>gi|16131330 GI:16131330|ASAP:ABE-0011292|UniProtKB/Swiss-Prot:P04816|EcoGene:EG10540|GeneID:947964|
2	_QAVAVANK_	_QAVAVANK_	QAVAVANK	-47.7152	16131330 GI:16131330	FALSE	_QAVAVANK_	400.735	NH3	5	y	1	485.272	8.37072	TRUE	gi	16131330 GI:16131330	16131330 GI:16131330	ASAP:ABE-0011292|UniProtKB/Swiss-Prot:P04816|EcoGene:EG10540|GeneID:947964|						GCF_000005845.2_ASM584v2_genomic_29-OCT-2014 _iRT	>gi|16131330 GI:16131330|ASAP:ABE-0011292|UniProtKB/Swiss-Prot:P04816|EcoGene:EG10540|GeneID:947964|
2	_QAVAVANK_	_QAVAVANK_	QAVAVANK	-47.7152	16131330 GI:16131330	FALSE	_QAVAVANK_	400.735	NH3	6	y	1	584.34	5.07953	TRUE	gi	16131330 GI:16131330	16131330 GI:16131330	ASAP:ABE-0011292|UniProtKB/Swiss-Prot:P04816|EcoGene:EG10540|GeneID:947964|						GCF_000005845.2_ASM584v2_genomic_29-OCT-2014 _iRT	>gi|16131330 GI:16131330|ASAP:ABE-0011292|UniProtKB/Swiss-Prot:P04816|EcoGene:EG10540|GeneID:947964|
2	_QAVAVANK_	_QAVAVANK_	QAVAVANK	-47.7152	16131330 GI:16131330	FALSE	_QAVAVANK_	400.735	noloss	6	y	1	601.367	47.3244	FALSE	gi	16131330 GI:16131330	16131330 GI:16131330	ASAP:ABE-0011292|UniProtKB/Swiss-Prot:P04816|EcoGene:EG10540|GeneID:947964|						GCF_000005845.2_ASM584v2_genomic_29-OCT-2014 _iRT	>gi|16131330 GI:16131330|ASAP:ABE-0011292|UniProtKB/Swiss-Prot:P04816|EcoGene:EG10540|GeneID:947964|
2	_QAVAVANK_	_QAVAVANK_	QAVAVANK	-47.7152	16131330 GI:16131330	FALSE	_QAVAVANK_	400.735	H2O	7	b	1	636.346	11.3689	TRUE	gi	16131330 GI:16131330	16131330 GI:16131330	ASAP:ABE-0011292|UniProtKB/Swiss-Prot:P04816|EcoGene:EG10540|GeneID:947964|						GCF_000005845.2_ASM584v2_genomic_29-OCT-2014 _iRT	>gi|16131330 GI:16131330|ASAP:ABE-0011292|UniProtKB/Swiss-Prot:P04816|EcoGene:EG10540|GeneID:947964|
2	_QAVAVANK_	_QAVAVANK_	QAVAVANK	-47.7152	16131330 GI:16131330	FALSE	_QAVAVANK_	400.735	noloss	7	y	1	672.404	12.7892	TRUE	gi	16131330 GI:16131330	16131330 GI:16131330	ASAP:ABE-0011292|UniProtKB/Swiss-Prot:P04816|EcoGene:EG10540|GeneID:947964|						GCF_000005845.2_ASM584v2_genomic_29-OCT-2014 _iRT	>gi|16131330 GI:16131330|ASAP:ABE-0011292|UniProtKB/Swiss-Prot:P04816|EcoGene:EG10540|GeneID:947964|
2	_VDGLGVLK_	_VDGLGVLK_	VDGLGVLK	21.1481	16129692 GI:16129692	TRUE	_VDGLGVLK_	400.747	noloss	3	y	1	359.265	9.29302	TRUE	gi	16129692 GI:16129692	16129692 GI:16129692	ASAP:ABE-0005797|UniProtKB/Swiss-Prot:P69795|EcoGene:EG10140|GeneID:945339|						GCF_000005845.2_ASM584v2_genomic_29-OCT-2014 _iRT	>gi|16129692 GI:16129692|ASAP:ABE-0005797|UniProtKB/Swiss-Prot:P69795|EcoGene:EG10140|GeneID:945339|
2	_VDGLGVLK_	_VDGLGVLK_	VDGLGVLK	21.1481	16129692 GI:16129692	TRUE	_VDGLGVLK_	400.747	NH3	4	b	1	368.182	28.0234	FALSE	gi	16129692 GI:16129692	16129692 GI:16129692	ASAP:ABE-0005797|UniProtKB/Swiss-Prot:P69795|EcoGene:EG10140|GeneID:945339|						GCF_000005845.2_ASM584v2_genomic_29-OCT-2014 _iRT	>gi|16129692 GI:16129692|ASAP:ABE-0005797|UniProtKB/Swiss-Prot:P69795|EcoGene:EG10140|GeneID:945339|
2	_VDGLGVLK_	_VDGLGVLK_	VDGLGVLK	21.1481	16129692 GI:16129692	TRUE	_VDGLGVLK_	400.747	noloss	4	y	1	416.287	36.6411	FALSE	gi	16129692 GI:16129692	16129692 GI:16129692	ASAP:ABE-0005797|UniProtKB/Swiss-Prot:P69795|EcoGene:EG10140|GeneID:945339|						GCF_000005845.2_ASM584v2_genomic_29-OCT-2014 _iRT	>gi|16129692 GI:16129692|ASAP:ABE-0005797|UniProtKB/Swiss-Prot:P69795|EcoGene:EG10140|GeneID:945339|
2	_VDGLGVLK_	_VDGLGVLK_	VDGLGVLK	21.1481	16129692 GI:16129692	TRUE	_VDGLGVLK_	400.747	H2O	5	b	1	424.219	7.43379	TRUE	gi	16129692 GI:16129692	16129692 GI:16129692	ASAP:ABE-0005797|UniProtKB/Swiss-Prot:P69795|EcoGene:EG10140|GeneID:945339|						GCF_000005845.2_ASM584v2_genomic_29-OCT-2014 _iRT	>gi|16129692 GI:16129692|ASAP:ABE-0005797|UniProtKB/Swiss-Prot:P69795|EcoGene:EG10140|GeneID:945339|
2	_VDGLGVLK_	_VDGLGVLK_	VDGLGVLK	21.1481	16129692 GI:16129692	TRUE	_VDGLGVLK_	400.747	noloss	5	b	1	442.23	25.2687	FALSE	gi	16129692 GI:16129692	16129692 GI:16129692	ASAP:ABE-0005797|UniProtKB/Swiss-Prot:P69795|EcoGene:EG10140|GeneID:945339|						GCF_000005845.2_ASM584v2_genomic_29-OCT-2014 _iRT	>gi|16129692 GI:16129692|ASAP:ABE-0005797|UniProtKB/Swiss-Prot:P69795|EcoGene:EG10140|GeneID:945339|
2	_VDGLGVLK_	_VDGLGVLK_	VDGLGVLK	21.1481	16129692 GI:16129692	TRUE	_VDGLGVLK_	400.747	noloss	6	y	1	586.392	73.9166	FALSE	gi	16129692 GI:16129692	16129692 GI:16129692	ASAP:ABE-0005797|UniProtKB/Swiss-Prot:P69795|EcoGene:EG10140|GeneID:945339|						GCF_000005845.2_ASM584v2_genomic_29-OCT-2014 _iRT	>gi|16129692 GI:16129692|ASAP:ABE-0005797|UniProtKB/Swiss-Prot:P69795|EcoGene:EG10140|GeneID:945339|
2	_VDGLGVLK_	_VDGLGVLK_	VDGLGVLK	21.1481	16129692 GI:16129692	TRUE	_VDGLGVLK_	400.747	H2O	7	y	1	683.409	15.663	FALSE	gi	16129692 GI:16129692	16129692 GI:16129692	ASAP:ABE-0005797|UniProtKB/Swiss-Prot:P69795|EcoGene:EG10140|GeneID:945339|						GCF_000005845.2_ASM584v2_genomic_29-OCT-2014 _iRT	>gi|16129692 GI:16129692|ASAP:ABE-0005797|UniProtKB/Swiss-Prot:P69795|EcoGene:EG10140|GeneID:945339|
2	_VDGLGVLK_	_VDGLGVLK_	VDGLGVLK	21.1481	16129692 GI:16129692	TRUE	_VDGLGVLK_	400.747	NH3	7	y	1	684.393	7.29131	TRUE	gi	16129692 GI:16129692	16129692 GI:16129692	ASAP:ABE-0005797|UniProtKB/Swiss-Prot:P69795|EcoGene:EG10140|GeneID:945339|						GCF_000005845.2_ASM584v2_genomic_29-OCT-2014 _iRT	>gi|16129692 GI:16129692|ASAP:ABE-0005797|UniProtKB/Swiss-Prot:P69795|EcoGene:EG10140|GeneID:945339|
2	_VDGLGVLK_	_VDGLGVLK_	VDGLGVLK	21.1481	16129692 GI:16129692	TRUE	_VDGLGVLK_	400.747	noloss	7	y	1	701.419	100	FALSE	gi	16129692 GI:16129692	16129692 GI:16129692	ASAP:ABE-0005797|UniProtKB/Swiss-Prot:P69795|EcoGene:EG10140|GeneID:945339|						GCF_000005845.2_ASM584v2_genomic_29-OCT-2014 _iRT	>gi|16129692 GI:16129692|ASAP:ABE-0005797|UniProtKB/Swiss-Prot:P69795|EcoGene:EG10140|GeneID:945339|
2	_VDGLGVLK_	_VDGLGVLK_	VDGLGVLK	21.1481	16129692 GI:16129692	TRUE	_VDGLGVLK_	400.747	noloss	5	y	1	529.371	8.98947	TRUE	gi	16129692 GI:16129692	16129692 GI:16129692	ASAP:ABE-0005797|UniProtKB/Swiss-Prot:P69795|EcoGene:EG10140|GeneID:945339|						GCF_000005845.2_ASM584v2_genomic_29-OCT-2014 _iRT	>gi|16129692 GI:16129692|ASAP:ABE-0005797|UniProtKB/Swiss-Prot:P69795|EcoGene:EG10140|GeneID:945339|
3	_QFWAHQVER_	_QFWAHQVER_	QFWAHQVER	6.34485	16130147 GI:16130147	TRUE	_QFWAHQVER_	400.868	noloss	5	y	2	334.677	83.9541	FALSE	gi	16130147 GI:16130147	16130147 GI:16130147	ASAP:ABE-0007300|UniProtKB/Swiss-Prot:P33940|EcoGene:EG12069|GeneID:946702|						GCF_000005845.2_ASM584v2_genomic_29-OCT-2014 _iRT	>gi|16130147 GI:16130147|ASAP:ABE-0007300|UniProtKB/Swiss-Prot:P33940|EcoGene:EG12069|GeneID:946702|
3	_QFWAHQVER_	_QFWAHQVER_	QFWAHQVER	6.34485	16130147 GI:16130147	TRUE	_QFWAHQVER_	400.868	NH3	8	b	3	337.156	7.05811	TRUE	gi	16130147 GI:16130147	16130147 GI:16130147	ASAP:ABE-0007300|UniProtKB/Swiss-Prot:P33940|EcoGene:EG12069|GeneID:946702|						GCF_000005845.2_ASM584v2_genomic_29-OCT-2014 _iRT	>gi|16130147 GI:16130147|ASAP:ABE-0007300|UniProtKB/Swiss-Prot:P33940|EcoGene:EG12069|GeneID:946702|
3	_QFWAHQVER_	_QFWAHQVER_	QFWAHQVER	6.34485	16130147 GI:16130147	TRUE	_QFWAHQVER_	400.868	NH3	6	y	2	361.683	10.4287	TRUE	gi	16130147 GI:16130147	16130147 GI:16130147	ASAP:ABE-0007300|UniProtKB/Swiss-Prot:P33940|EcoGene:EG12069|GeneID:946702|						GCF_000005845.2_ASM584v2_genomic_29-OCT-2014 _iRT	>gi|16130147 GI:16130147|ASAP:ABE-0007300|UniProtKB/Swiss-Prot:P33940|EcoGene:EG12069|GeneID:946702|
3	_QFWAHQVER_	_QFWAHQVER_	QFWAHQVER	6.34485	16130147 GI:16130147	TRUE	_QFWAHQVER_	400.868	noloss	6	y	2	370.196	35.6958	FALSE	gi	16130147 GI:16130147	16130147 GI:16130147	ASAP:ABE-0007300|UniProtKB/Swiss-Prot:P33940|EcoGene:EG12069|GeneID:946702|						GCF_000005845.2_ASM584v2_genomic_29-OCT-2014 _iRT	>gi|16130147 GI:16130147|ASAP:ABE-0007300|UniProtKB/Swiss-Prot:P33940|EcoGene:EG12069|GeneID:946702|
3	_QFWAHQVER_	_QFWAHQVER_	QFWAHQVER	6.34485	16130147 GI:16130147	TRUE	_QFWAHQVER_	400.868	NH3	3	y	1	386.203	5.4822	TRUE	gi	16130147 GI:16130147	16130147 GI:16130147	ASAP:ABE-0007300|UniProtKB/Swiss-Prot:P33940|EcoGene:EG12069|GeneID:946702|						GCF_000005845.2_ASM584v2_genomic_29-OCT-2014 _iRT	>gi|16130147 GI:16130147|ASAP:ABE-0007300|UniProtKB/Swiss-Prot:P33940|EcoGene:EG12069|GeneID:946702|
3	_QFWAHQVER_	_QFWAHQVER_	QFWAHQVER	6.34485	16130147 GI:16130147	TRUE	_QFWAHQVER_	400.868	noloss	3	y	1	403.23	63.9065	FALSE	gi	16130147 GI:16130147	16130147 GI:16130147	ASAP:ABE-0007300|UniProtKB/Swiss-Prot:P33940|EcoGene:EG12069|GeneID:946702|						GCF_000005845.2_ASM584v2_genomic_29-OCT-2014 _iRT	>gi|16130147 GI:16130147|ASAP:ABE-0007300|UniProtKB/Swiss-Prot:P33940|EcoGene:EG12069|GeneID:946702|
3	_QFWAHQVER_	_QFWAHQVER_	QFWAHQVER	6.34485	16130147 GI:16130147	TRUE	_QFWAHQVER_	400.868	H2O	3	b	1	444.203	15.1845	TRUE	gi	16130147 GI:16130147	16130147 GI:16130147	ASAP:ABE-0007300|UniProtKB/Swiss-Prot:P33940|EcoGene:EG12069|GeneID:946702|						GCF_000005845.2_ASM584v2_genomic_29-OCT-2014 _iRT	>gi|16130147 GI:16130147|ASAP:ABE-0007300|UniProtKB/Swiss-Prot:P33940|EcoGene:EG12069|GeneID:946702|
3	_QFWAHQVER_	_QFWAHQVER_	QFWAHQVER	6.34485	16130147 GI:16130147	TRUE	_QFWAHQVER_	400.868	NH3	3	b	1	445.187	8.12091	TRUE	gi	16130147 GI:16130147	16130147 GI:16130147	ASAP:ABE-0007300|UniProtKB/Swiss-Prot:P33940|EcoGene:EG12069|GeneID:946702|						GCF_000005845.2_ASM584v2_genomic_29-OCT-2014 _iRT	>gi|16130147 GI:16130147|ASAP:ABE-0007300|UniProtKB/Swiss-Prot:P33940|EcoGene:EG12069|GeneID:946702|
3	_QFWAHQVER_	_QFWAHQVER_	QFWAHQVER	6.34485	16130147 GI:16130147	TRUE	_QFWAHQVER_	400.868	NH3	7	y	2	454.722	27.3922	TRUE	gi	16130147 GI:16130147	16130147 GI:16130147	ASAP:ABE-0007300|UniProtKB/Swiss-Prot:P33940|EcoGene:EG12069|GeneID:946702|						GCF_000005845.2_ASM584v2_genomic_29-OCT-2014 _iRT	>gi|16130147 GI:16130147|ASAP:ABE-0007300|UniProtKB/Swiss-Prot:P33940|EcoGene:EG12069|GeneID:946702|
3	_QFWAHQVER_	_QFWAHQVER_	QFWAHQVER	6.34485	16130147 GI:16130147	TRUE	_QFWAHQVER_	400.868	noloss	7	y	2	463.236	9.98304	TRUE	gi	16130147 GI:16130147	16130147 GI:16130147	ASAP:ABE-0007300|UniProtKB/Swiss-Prot:P33940|EcoGene:EG12069|GeneID:946702|						GCF_000005845.2_ASM584v2_genomic_29-OCT-2014 _iRT	>gi|16130147 GI:16130147|ASAP:ABE-0007300|UniProtKB/Swiss-Prot:P33940|EcoGene:EG12069|GeneID:946702|
3	_QFWAHQVER_	_QFWAHQVER_	QFWAHQVER	6.34485	16130147 GI:16130147	TRUE	_QFWAHQVER_	400.868	H2O	4	y	1	513.278	20.9345	TRUE	gi	16130147 GI:16130147	16130147 GI:16130147	ASAP:ABE-0007300|UniProtKB/Swiss-Prot:P33940|EcoGene:EG12069|GeneID:946702|						GCF_000005845.2_ASM584v2_genomic_29-OCT-2014 _iRT	>gi|16130147 GI:16130147|ASAP:ABE-0007300|UniProtKB/Swiss-Prot:P33940|EcoGene:EG12069|GeneID:946702|
3	_QFWAHQVER_	_QFWAHQVER_	QFWAHQVER	6.34485	16130147 GI:16130147	TRUE	_QFWAHQVER_	400.868	NH3	4	y	1	514.262	30.8281	TRUE	gi	16130147 GI:16130147	16130147 GI:16130147	ASAP:ABE-0007300|UniProtKB/Swiss-Prot:P33940|EcoGene:EG12069|GeneID:946702|						GCF_000005845.2_ASM584v2_genomic_29-OCT-2014 _iRT	>gi|16130147 GI:16130147|ASAP:ABE-0007300|UniProtKB/Swiss-Prot:P33940|EcoGene:EG12069|GeneID:946702|
3	_QFWAHQVER_	_QFWAHQVER_	QFWAHQVER	6.34485	16130147 GI:16130147	TRUE	_QFWAHQVER_	400.868	H2O	4	b	1	515.24	36.2348	FALSE	gi	16130147 GI:16130147	16130147 GI:16130147	ASAP:ABE-0007300|UniProtKB/Swiss-Prot:P33940|EcoGene:EG12069|GeneID:946702|						GCF_000005845.2_ASM584v2_genomic_29-OCT-2014 _iRT	>gi|16130147 GI:16130147|ASAP:ABE-0007300|UniProtKB/Swiss-Prot:P33940|EcoGene:EG12069|GeneID:946702|
3	_QFWAHQVER_	_QFWAHQVER_	QFWAHQVER	6.34485	16130147 GI:16130147	TRUE	_QFWAHQVER_	400.868	NH3	4	b	1	516.224	10.352	TRUE	gi	16130147 GI:16130147	16130147 GI:16130147	ASAP:ABE-0007300|UniProtKB/Swiss-Prot:P33940|EcoGene:EG12069|GeneID:946702|						GCF_000005845.2_ASM584v2_genomic_29-OCT-2014 _iRT	>gi|16130147 GI:16130147|ASAP:ABE-0007300|UniProtKB/Swiss-Prot:P33940|EcoGene:EG12069|GeneID:946702|
3	_QFWAHQVER_	_QFWAHQVER_	QFWAHQVER	6.34485	16130147 GI:16130147	TRUE	_QFWAHQVER_	400.868	noloss	4	y	1	531.289	100	FALSE	gi	16130147 GI:16130147	16130147 GI:16130147	ASAP:ABE-0007300|UniProtKB/Swiss-Prot:P33940|EcoGene:EG12069|GeneID:946702|						GCF_000005845.2_ASM584v2_genomic_29-OCT-2014 _iRT	>gi|16130147 GI:16130147|ASAP:ABE-0007300|UniProtKB/Swiss-Prot:P33940|EcoGene:EG12069|GeneID:946702|
3	_QFWAHQVER_	_QFWAHQVER_	QFWAHQVER	6.34485	16130147 GI:16130147	TRUE	_QFWAHQVER_	400.868	H2O	5	b	1	652.299	7.68381	TRUE	gi	16130147 GI:16130147	16130147 GI:16130147	ASAP:ABE-0007300|UniProtKB/Swiss-Prot:P33940|EcoGene:EG12069|GeneID:946702|						GCF_000005845.2_ASM584v2_genomic_29-OCT-2014 _iRT	>gi|16130147 GI:16130147|ASAP:ABE-0007300|UniProtKB/Swiss-Prot:P33940|EcoGene:EG12069|GeneID:946702|
3	_QFWAHQVER_	_QFWAHQVER_	QFWAHQVER	6.34485	16130147 GI:16130147	TRUE	_QFWAHQVER_	400.868	noloss	5	y	1	668.347	37.0012	FALSE	gi	16130147 GI:16130147	16130147 GI:16130147	ASAP:ABE-0007300|UniProtKB/Swiss-Prot:P33940|EcoGene:EG12069|GeneID:946702|						GCF_000005845.2_ASM584v2_genomic_29-OCT-2014 _iRT	>gi|16130147 GI:16130147|ASAP:ABE-0007300|UniProtKB/Swiss-Prot:P33940|EcoGene:EG12069|GeneID:946702|
3	_QFWAHQVER_	_QFWAHQVER_	QFWAHQVER	6.34485	16130147 GI:16130147	TRUE	_QFWAHQVER_	400.868	noloss	6	y	1	739.385	31.1994	TRUE	gi	16130147 GI:16130147	16130147 GI:16130147	ASAP:ABE-0007300|UniProtKB/Swiss-Prot:P33940|EcoGene:EG12069|GeneID:946702|						GCF_000005845.2_ASM584v2_genomic_29-OCT-2014 _iRT	>gi|16130147 GI:16130147|ASAP:ABE-0007300|UniProtKB/Swiss-Prot:P33940|EcoGene:EG12069|GeneID:946702|
3	_FIHALDELSR_	_FIHALDELSR_	FIHALDELSR	35.3706	90111352 GI:90111352	TRUE	_FIHALDELSR_	400.884	H2O	3	y	1	357.224	8.95577	TRUE	gi	90111352 GI:90111352	90111352 GI:90111352	ASAP:ABE-0006257|UniProtKB/Swiss-Prot:P52007|EcoGene:EG13405|GeneID:946415|						GCF_000005845.2_ASM584v2_genomic_29-OCT-2014 _iRT	>gi|90111352 GI:90111352|ASAP:ABE-0006257|UniProtKB/Swiss-Prot:P52007|EcoGene:EG13405|GeneID:946415|
3	_FIHALDELSR_	_FIHALDELSR_	FIHALDELSR	35.3706	90111352 GI:90111352	TRUE	_FIHALDELSR_	400.884	NH3	3	y	1	358.208	6.89646	TRUE	gi	90111352 GI:90111352	90111352 GI:90111352	ASAP:ABE-0006257|UniProtKB/Swiss-Prot:P52007|EcoGene:EG13405|GeneID:946415|						GCF_000005845.2_ASM584v2_genomic_29-OCT-2014 _iRT	>gi|90111352 GI:90111352|ASAP:ABE-0006257|UniProtKB/Swiss-Prot:P52007|EcoGene:EG13405|GeneID:946415|
3	_FIHALDELSR_	_FIHALDELSR_	FIHALDELSR	35.3706	90111352 GI:90111352	TRUE	_FIHALDELSR_	400.884	noloss	3	y	1	375.235	99.6576	FALSE	gi	90111352 GI:90111352	90111352 GI:90111352	ASAP:ABE-0006257|UniProtKB/Swiss-Prot:P52007|EcoGene:EG13405|GeneID:946415|						GCF_000005845.2_ASM584v2_genomic_29-OCT-2014 _iRT	>gi|90111352 GI:90111352|ASAP:ABE-0006257|UniProtKB/Swiss-Prot:P52007|EcoGene:EG13405|GeneID:946415|
3	_FIHALDELSR_	_FIHALDELSR_	FIHALDELSR	35.3706	90111352 GI:90111352	TRUE	_FIHALDELSR_	400.884	H2O	3	b	1	380.208	13.4615	TRUE	gi	90111352 GI:90111352	90111352 GI:90111352	ASAP:ABE-0006257|UniProtKB/Swiss-Prot:P52007|EcoGene:EG13405|GeneID:946415|						GCF_000005845.2_ASM584v2_genomic_29-OCT-2014 _iRT	>gi|90111352 GI:90111352|ASAP:ABE-0006257|UniProtKB/Swiss-Prot:P52007|EcoGene:EG13405|GeneID:946415|
3	_FIHALDELSR_	_FIHALDELSR_	FIHALDELSR	35.3706	90111352 GI:90111352	TRUE	_FIHALDELSR_	400.884	noloss	3	b	1	398.219	100	FALSE	gi	90111352 GI:90111352	90111352 GI:90111352	ASAP:ABE-0006257|UniProtKB/Swiss-Prot:P52007|EcoGene:EG13405|GeneID:946415|						GCF_000005845.2_ASM584v2_genomic_29-OCT-2014 _iRT	>gi|90111352 GI:90111352|ASAP:ABE-0006257|UniProtKB/Swiss-Prot:P52007|EcoGene:EG13405|GeneID:946415|
3	_FIHALDELSR_	_FIHALDELSR_	FIHALDELSR	35.3706	90111352 GI:90111352	TRUE	_FIHALDELSR_	400.884	H2O	8	y	2	461.741	6.20349	TRUE	gi	90111352 GI:90111352	90111352 GI:90111352	ASAP:ABE-0006257|UniProtKB/Swiss-Prot:P52007|EcoGene:EG13405|GeneID:946415|						GCF_000005845.2_ASM584v2_genomic_29-OCT-2014 _iRT	>gi|90111352 GI:90111352|ASAP:ABE-0006257|UniProtKB/Swiss-Prot:P52007|EcoGene:EG13405|GeneID:946415|
3	_FIHALDELSR_	_FIHALDELSR_	FIHALDELSR	35.3706	90111352 GI:90111352	TRUE	_FIHALDELSR_	400.884	noloss	4	b	1	469.256	50.2598	FALSE	gi	90111352 GI:90111352	90111352 GI:90111352	ASAP:ABE-0006257|UniProtKB/Swiss-Prot:P52007|EcoGene:EG13405|GeneID:946415|						GCF_000005845.2_ASM584v2_genomic_29-OCT-2014 _iRT	>gi|90111352 GI:90111352|ASAP:ABE-0006257|UniProtKB/Swiss-Prot:P52007|EcoGene:EG13405|GeneID:946415|
3	_FIHALDELSR_	_FIHALDELSR_	FIHALDELSR	35.3706	90111352 GI:90111352	TRUE	_FIHALDELSR_	400.884	noloss	8	b	2	470.25	11.8626	TRUE	gi	90111352 GI:90111352	90111352 GI:90111352	ASAP:ABE-0006257|UniProtKB/Swiss-Prot:P52007|EcoGene:EG13405|GeneID:946415|						GCF_000005845.2_ASM584v2_genomic_29-OCT-2014 _iRT	>gi|90111352 GI:90111352|ASAP:ABE-0006257|UniProtKB/Swiss-Prot:P52007|EcoGene:EG13405|GeneID:946415|
3	_FIHALDELSR_	_FIHALDELSR_	FIHALDELSR	35.3706	90111352 GI:90111352	TRUE	_FIHALDELSR_	400.884	noloss	8	y	2	470.746	13.019	TRUE	gi	90111352 GI:90111352	90111352 GI:90111352	ASAP:ABE-0006257|UniProtKB/Swiss-Prot:P52007|EcoGene:EG13405|GeneID:946415|						GCF_000005845.2_ASM584v2_genomic_29-OCT-2014 _iRT	>gi|90111352 GI:90111352|ASAP:ABE-0006257|UniProtKB/Swiss-Prot:P52007|EcoGene:EG13405|GeneID:946415|
3	_FIHALDELSR_	_FIHALDELSR_	FIHALDELSR	35.3706	90111352 GI:90111352	TRUE	_FIHALDELSR_	400.884	H2O	4	y	1	486.267	42.5366	FALSE	gi	90111352 GI:90111352	90111352 GI:90111352	ASAP:ABE-0006257|UniProtKB/Swiss-Prot:P52007|EcoGene:EG13405|GeneID:946415|						GCF_000005845.2_ASM584v2_genomic_29-OCT-2014 _iRT	>gi|90111352 GI:90111352|ASAP:ABE-0006257|UniProtKB/Swiss-Prot:P52007|EcoGene:EG13405|GeneID:946415|
3	_FIHALDELSR_	_FIHALDELSR_	FIHALDELSR	35.3706	90111352 GI:90111352	TRUE	_FIHALDELSR_	400.884	noloss	4	y	1	504.278	53.9922	FALSE	gi	90111352 GI:90111352	90111352 GI:90111352	ASAP:ABE-0006257|UniProtKB/Swiss-Prot:P52007|EcoGene:EG13405|GeneID:946415|						GCF_000005845.2_ASM584v2_genomic_29-OCT-2014 _iRT	>gi|90111352 GI:90111352|ASAP:ABE-0006257|UniProtKB/Swiss-Prot:P52007|EcoGene:EG13405|GeneID:946415|
3	_FIHALDELSR_	_FIHALDELSR_	FIHALDELSR	35.3706	90111352 GI:90111352	TRUE	_FIHALDELSR_	400.884	noloss	5	b	1	582.34	10.1156	TRUE	gi	90111352 GI:90111352	90111352 GI:90111352	ASAP:ABE-0006257|UniProtKB/Swiss-Prot:P52007|EcoGene:EG13405|GeneID:946415|						GCF_000005845.2_ASM584v2_genomic_29-OCT-2014 _iRT	>gi|90111352 GI:90111352|ASAP:ABE-0006257|UniProtKB/Swiss-Prot:P52007|EcoGene:EG13405|GeneID:946415|
3	_FIHALDELSR_	_FIHALDELSR_	FIHALDELSR	35.3706	90111352 GI:90111352	TRUE	_FIHALDELSR_	400.884	H2O	5	y	1	601.294	5.18367	TRUE	gi	90111352 GI:90111352	90111352 GI:90111352	ASAP:ABE-0006257|UniProtKB/Swiss-Prot:P52007|EcoGene:EG13405|GeneID:946415|						GCF_000005845.2_ASM584v2_genomic_29-OCT-2014 _iRT	>gi|90111352 GI:90111352|ASAP:ABE-0006257|UniProtKB/Swiss-Prot:P52007|EcoGene:EG13405|GeneID:946415|
3	_FIHALDELSR_	_FIHALDELSR_	FIHALDELSR	35.3706	90111352 GI:90111352	TRUE	_FIHALDELSR_	400.884	noloss	5	y	1	619.305	35.5331	FALSE	gi	90111352 GI:90111352	90111352 GI:90111352	ASAP:ABE-0006257|UniProtKB/Swiss-Prot:P52007|EcoGene:EG13405|GeneID:946415|						GCF_000005845.2_ASM584v2_genomic_29-OCT-2014 _iRT	>gi|90111352 GI:90111352|ASAP:ABE-0006257|UniProtKB/Swiss-Prot:P52007|EcoGene:EG13405|GeneID:946415|
3	_FIHALDELSR_	_FIHALDELSR_	FIHALDELSR	35.3706	90111352 GI:90111352	TRUE	_FIHALDELSR_	400.884	noloss	6	b	1	697.367	26.5913	TRUE	gi	90111352 GI:90111352	90111352 GI:90111352	ASAP:ABE-0006257|UniProtKB/Swiss-Prot:P52007|EcoGene:EG13405|GeneID:946415|						GCF_000005845.2_ASM584v2_genomic_29-OCT-2014 _iRT	>gi|90111352 GI:90111352|ASAP:ABE-0006257|UniProtKB/Swiss-Prot:P52007|EcoGene:EG13405|GeneID:946415|
3	_FIHALDELSR_	_FIHALDELSR_	FIHALDELSR	35.3706	90111352 GI:90111352	TRUE	_FIHALDELSR_	400.884	noloss	6	y	1	732.389	9.76302	TRUE	gi	90111352 GI:90111352	90111352 GI:90111352	ASAP:ABE-0006257|UniProtKB/Swiss-Prot:P52007|EcoGene:EG13405|GeneID:946415|						GCF_000005845.2_ASM584v2_genomic_29-OCT-2014 _iRT	>gi|90111352 GI:90111352|ASAP:ABE-0006257|UniProtKB/Swiss-Prot:P52007|EcoGene:EG13405|GeneID:946415|
3	_FIHALDELSR_	_FIHALDELSR_	FIHALDELSR	35.3706	90111352 GI:90111352	TRUE	_FIHALDELSR_	400.884	H2O	7	y	1	785.415	7.00579	TRUE	gi	90111352 GI:90111352	90111352 GI:90111352	ASAP:ABE-0006257|UniProtKB/Swiss-Prot:P52007|EcoGene:EG13405|GeneID:946415|						GCF_000005845.2_ASM584v2_genomic_29-OCT-2014 _iRT	>gi|90111352 GI:90111352|ASAP:ABE-0006257|UniProtKB/Swiss-Prot:P52007|EcoGene:EG13405|GeneID:946415|
3	_FIHALDELSR_	_FIHALDELSR_	FIHALDELSR	35.3706	90111352 GI:90111352	TRUE	_FIHALDELSR_	400.884	noloss	7	y	1	803.426	23.1797	TRUE	gi	90111352 GI:90111352	90111352 GI:90111352	ASAP:ABE-0006257|UniProtKB/Swiss-Prot:P52007|EcoGene:EG13405|GeneID:946415|						GCF_000005845.2_ASM584v2_genomic_29-OCT-2014 _iRT	>gi|90111352 GI:90111352|ASAP:ABE-0006257|UniProtKB/Swiss-Prot:P52007|EcoGene:EG13405|GeneID:946415|
3	_FIHALDELSR_	_FIHALDELSR_	FIHALDELSR	35.3706	90111352 GI:90111352	TRUE	_FIHALDELSR_	400.884	noloss	7	b	1	826.409	7.78106	TRUE	gi	90111352 GI:90111352	90111352 GI:90111352	ASAP:ABE-0006257|UniProtKB/Swiss-Prot:P52007|EcoGene:EG13405|GeneID:946415|						GCF_000005845.2_ASM584v2_genomic_29-OCT-2014 _iRT	>gi|90111352 GI:90111352|ASAP:ABE-0006257|UniProtKB/Swiss-Prot:P52007|EcoGene:EG13405|GeneID:946415|
2	_EDTPAIR_	_EDTPAIR_	EDTPAIR	-23.9158	16131181 GI:16131181	TRUE	_EDTPAIR_	401.209	noloss	3	y	1	359.24	55.0531	FALSE	gi	16131181 GI:16131181	16131181 GI:16131181	ASAP:ABE-0010821|UniProtKB/Swiss-Prot:P0AG51|EcoGene:EG10888|GeneID:947797|						GCF_000005845.2_ASM584v2_genomic_29-OCT-2014 _iRT	>gi|16131181 GI:16131181|ASAP:ABE-0010821|UniProtKB/Swiss-Prot:P0AG51|EcoGene:EG10888|GeneID:947797|
2	_EDTPAIR_	_EDTPAIR_	EDTPAIR	-23.9158	16131181 GI:16131181	TRUE	_EDTPAIR_	401.209	NH3	4	y	1	439.266	10.453	FALSE	gi	16131181 GI:16131181	16131181 GI:16131181	ASAP:ABE-0010821|UniProtKB/Swiss-Prot:P0AG51|EcoGene:EG10888|GeneID:947797|						GCF_000005845.2_ASM584v2_genomic_29-OCT-2014 _iRT	>gi|16131181 GI:16131181|ASAP:ABE-0010821|UniProtKB/Swiss-Prot:P0AG51|EcoGene:EG10888|GeneID:947797|
2	_EDTPAIR_	_EDTPAIR_	EDTPAIR	-23.9158	16131181 GI:16131181	TRUE	_EDTPAIR_	401.209	noloss	4	y	1	456.293	100	FALSE	gi	16131181 GI:16131181	16131181 GI:16131181	ASAP:ABE-0010821|UniProtKB/Swiss-Prot:P0AG51|EcoGene:EG10888|GeneID:947797|						GCF_000005845.2_ASM584v2_genomic_29-OCT-2014 _iRT	>gi|16131181 GI:16131181|ASAP:ABE-0010821|UniProtKB/Swiss-Prot:P0AG51|EcoGene:EG10888|GeneID:947797|
2	_EDTPAIR_	_EDTPAIR_	EDTPAIR	-23.9158	16131181 GI:16131181	TRUE	_EDTPAIR_	401.209	noloss	5	y	1	557.341	16.1677	FALSE	gi	16131181 GI:16131181	16131181 GI:16131181	ASAP:ABE-0010821|UniProtKB/Swiss-Prot:P0AG51|EcoGene:EG10888|GeneID:947797|						GCF_000005845.2_ASM584v2_genomic_29-OCT-2014 _iRT	>gi|16131181 GI:16131181|ASAP:ABE-0010821|UniProtKB/Swiss-Prot:P0AG51|EcoGene:EG10888|GeneID:947797|
2	_EDTPAIR_	_EDTPAIR_	EDTPAIR	-23.9158	16131181 GI:16131181	TRUE	_EDTPAIR_	401.209	noloss	6	y	1	672.368	5.3971	FALSE	gi	16131181 GI:16131181	16131181 GI:16131181	ASAP:ABE-0010821|UniProtKB/Swiss-Prot:P0AG51|EcoGene:EG10888|GeneID:947797|						GCF_000005845.2_ASM584v2_genomic_29-OCT-2014 _iRT	>gi|16131181 GI:16131181|ASAP:ABE-0010821|UniProtKB/Swiss-Prot:P0AG51|EcoGene:EG10888|GeneID:947797|
3	_GMLSHWMVIK_	_GMLSHWMVIK_	GMLSHWMVIK	57.5159	16130894 GI:16130894	TRUE	_GMLSHWMVIK_	401.212	noloss	3	b	1	302.153	26.271	FALSE	gi	16130894 GI:16130894	16130894 GI:16130894	ASAP:ABE-0009828|UniProtKB/Swiss-Prot:P0ACE0|EcoGene:EG11801|GeneID:945182|						GCF_000005845.2_ASM584v2_genomic_29-OCT-2014 _iRT	>gi|16130894 GI:16130894|ASAP:ABE-0009828|UniProtKB/Swiss-Prot:P0ACE0|EcoGene:EG11801|GeneID:945182|
3	_GMLSHWMVIK_	_GMLSHWMVIK_	GMLSHWMVIK	57.5159	16130894 GI:16130894	TRUE	_GMLSHWMVIK_	401.212	NH3	5	y	2	330.183	20.7808	TRUE	gi	16130894 GI:16130894	16130894 GI:16130894	ASAP:ABE-0009828|UniProtKB/Swiss-Prot:P0ACE0|EcoGene:EG11801|GeneID:945182|						GCF_000005845.2_ASM584v2_genomic_29-OCT-2014 _iRT	>gi|16130894 GI:16130894|ASAP:ABE-0009828|UniProtKB/Swiss-Prot:P0ACE0|EcoGene:EG11801|GeneID:945182|
3	_GMLSHWMVIK_	_GMLSHWMVIK_	GMLSHWMVIK	57.5159	16130894 GI:16130894	TRUE	_GMLSHWMVIK_	401.212	noloss	3	y	1	359.265	35.7119	FALSE	gi	16130894 GI:16130894	16130894 GI:16130894	ASAP:ABE-0009828|UniProtKB/Swiss-Prot:P0ACE0|EcoGene:EG11801|GeneID:945182|						GCF_000005845.2_ASM584v2_genomic_29-OCT-2014 _iRT	>gi|16130894 GI:16130894|ASAP:ABE-0009828|UniProtKB/Swiss-Prot:P0ACE0|EcoGene:EG11801|GeneID:945182|
3	_GMLSHWMVIK_	_GMLSHWMVIK_	GMLSHWMVIK	57.5159	16130894 GI:16130894	TRUE	_GMLSHWMVIK_	401.212	noloss	6	y	2	407.226	100	FALSE	gi	16130894 GI:16130894	16130894 GI:16130894	ASAP:ABE-0009828|UniProtKB/Swiss-Prot:P0ACE0|EcoGene:EG11801|GeneID:945182|						GCF_000005845.2_ASM584v2_genomic_29-OCT-2014 _iRT	>gi|16130894 GI:16130894|ASAP:ABE-0009828|UniProtKB/Swiss-Prot:P0ACE0|EcoGene:EG11801|GeneID:945182|
3	_GMLSHWMVIK_	_GMLSHWMVIK_	GMLSHWMVIK	57.5159	16130894 GI:16130894	TRUE	_GMLSHWMVIK_	401.212	H2O	7	y	2	441.736	19.2614	TRUE	gi	16130894 GI:16130894	16130894 GI:16130894	ASAP:ABE-0009828|UniProtKB/Swiss-Prot:P0ACE0|EcoGene:EG11801|GeneID:945182|						GCF_000005845.2_ASM584v2_genomic_29-OCT-2014 _iRT	>gi|16130894 GI:16130894|ASAP:ABE-0009828|UniProtKB/Swiss-Prot:P0ACE0|EcoGene:EG11801|GeneID:945182|
3	_GMLSHWMVIK_	_GMLSHWMVIK_	GMLSHWMVIK	57.5159	16130894 GI:16130894	TRUE	_GMLSHWMVIK_	401.212	noloss	7	y	2	450.742	52.8369	FALSE	gi	16130894 GI:16130894	16130894 GI:16130894	ASAP:ABE-0009828|UniProtKB/Swiss-Prot:P0ACE0|EcoGene:EG11801|GeneID:945182|						GCF_000005845.2_ASM584v2_genomic_29-OCT-2014 _iRT	>gi|16130894 GI:16130894|ASAP:ABE-0009828|UniProtKB/Swiss-Prot:P0ACE0|EcoGene:EG11801|GeneID:945182|
3	_GMLSHWMVIK_	_GMLSHWMVIK_	GMLSHWMVIK	57.5159	16130894 GI:16130894	TRUE	_GMLSHWMVIK_	401.212	noloss	4	y	1	490.306	43.5713	FALSE	gi	16130894 GI:16130894	16130894 GI:16130894	ASAP:ABE-0009828|UniProtKB/Swiss-Prot:P0ACE0|EcoGene:EG11801|GeneID:945182|						GCF_000005845.2_ASM584v2_genomic_29-OCT-2014 _iRT	>gi|16130894 GI:16130894|ASAP:ABE-0009828|UniProtKB/Swiss-Prot:P0ACE0|EcoGene:EG11801|GeneID:945182|
3	_GMLSHWMVIK_	_GMLSHWMVIK_	GMLSHWMVIK	57.5159	16130894 GI:16130894	TRUE	_GMLSHWMVIK_	401.212	noloss	8	y	2	507.284	18.3256	TRUE	gi	16130894 GI:16130894	16130894 GI:16130894	ASAP:ABE-0009828|UniProtKB/Swiss-Prot:P0ACE0|EcoGene:EG11801|GeneID:945182|						GCF_000005845.2_ASM584v2_genomic_29-OCT-2014 _iRT	>gi|16130894 GI:16130894|ASAP:ABE-0009828|UniProtKB/Swiss-Prot:P0ACE0|EcoGene:EG11801|GeneID:945182|
3	_GMLSHWMVIK_	_GMLSHWMVIK_	GMLSHWMVIK	57.5159	16130894 GI:16130894	TRUE	_GMLSHWMVIK_	401.212	noloss	5	y	1	676.385	95.954	FALSE	gi	16130894 GI:16130894	16130894 GI:16130894	ASAP:ABE-0009828|UniProtKB/Swiss-Prot:P0ACE0|EcoGene:EG11801|GeneID:945182|						GCF_000005845.2_ASM584v2_genomic_29-OCT-2014 _iRT	>gi|16130894 GI:16130894|ASAP:ABE-0009828|UniProtKB/Swiss-Prot:P0ACE0|EcoGene:EG11801|GeneID:945182|
3	_GMLSHWMVIK_	_GMLSHWMVIK_	GMLSHWMVIK	57.5159	16130894 GI:16130894	TRUE	_GMLSHWMVIK_	401.212	noloss	6	y	1	813.444	20.9886	TRUE	gi	16130894 GI:16130894	16130894 GI:16130894	ASAP:ABE-0009828|UniProtKB/Swiss-Prot:P0ACE0|EcoGene:EG11801|GeneID:945182|						GCF_000005845.2_ASM584v2_genomic_29-OCT-2014 _iRT	>gi|16130894 GI:16130894|ASAP:ABE-0009828|UniProtKB/Swiss-Prot:P0ACE0|EcoGene:EG11801|GeneID:945182|
3	_GMLSHWMVIK_	_GMLSHWMVIK_	GMLSHWMVIK	57.5159	16130894 GI:16130894	TRUE	_GMLSHWMVIK_	401.212	noloss	7	y	1	900.476	22.8173	TRUE	gi	16130894 GI:16130894	16130894 GI:16130894	ASAP:ABE-0009828|UniProtKB/Swiss-Prot:P0ACE0|EcoGene:EG11801|GeneID:945182|						GCF_000005845.2_ASM584v2_genomic_29-OCT-2014 _iRT	>gi|16130894 GI:16130894|ASAP:ABE-0009828|UniProtKB/Swiss-Prot:P0ACE0|EcoGene:EG11801|GeneID:945182|
3	_GMLSHWMVIK_	_GMLSHWMVIK_	GMLSHWMVIK	57.5159	16130894 GI:16130894	TRUE	_GMLSHWMVIK_	401.212	H2O	4	b	1	371.175	7.97422	TRUE	gi	16130894 GI:16130894	16130894 GI:16130894	ASAP:ABE-0009828|UniProtKB/Swiss-Prot:P0ACE0|EcoGene:EG11801|GeneID:945182|						GCF_000005845.2_ASM584v2_genomic_29-OCT-2014 _iRT	>gi|16130894 GI:16130894|ASAP:ABE-0009828|UniProtKB/Swiss-Prot:P0ACE0|EcoGene:EG11801|GeneID:945182|
3	_GMLSHWMVIK_	_GMLSHWMVIK_	GMLSHWMVIK	57.5159	16130894 GI:16130894	TRUE	_GMLSHWMVIK_	401.212	noloss	5	b	1	526.244	17.129	TRUE	gi	16130894 GI:16130894	16130894 GI:16130894	ASAP:ABE-0009828|UniProtKB/Swiss-Prot:P0ACE0|EcoGene:EG11801|GeneID:945182|						GCF_000005845.2_ASM584v2_genomic_29-OCT-2014 _iRT	>gi|16130894 GI:16130894|ASAP:ABE-0009828|UniProtKB/Swiss-Prot:P0ACE0|EcoGene:EG11801|GeneID:945182|
3	_GMLSHWMVIK_	_GMLSHWMVIK_	GMLSHWMVIK	57.5159	16130894 GI:16130894	TRUE	_GMLSHWMVIK_	401.212	noloss	8	y	1	1013.56	9.13041	TRUE	gi	16130894 GI:16130894	16130894 GI:16130894	ASAP:ABE-0009828|UniProtKB/Swiss-Prot:P0ACE0|EcoGene:EG11801|GeneID:945182|						GCF_000005845.2_ASM584v2_genomic_29-OCT-2014 _iRT	>gi|16130894 GI:16130894|ASAP:ABE-0009828|UniProtKB/Swiss-Prot:P0ACE0|EcoGene:EG11801|GeneID:945182|
2	_GLEELLK_	_GLEELLK_	GLEELLK	43.8792	16128915 GI:16128915	TRUE	_GLEELLK_	401.239	noloss	3	y	1	373.281	25.9718	FALSE	gi	16128915 GI:16128915	16128915 GI:16128915	ASAP:ABE-0003211|UniProtKB/Swiss-Prot:P75864|EcoGene:EG13717|GeneID:945564|						GCF_000005845.2_ASM584v2_genomic_29-OCT-2014 _iRT	>gi|16128915 GI:16128915|ASAP:ABE-0003211|UniProtKB/Swiss-Prot:P75864|EcoGene:EG13717|GeneID:945564|
2	_GLEELLK_	_GLEELLK_	GLEELLK	43.8792	16128915 GI:16128915	TRUE	_GLEELLK_	401.239	H2O	4	y	1	484.313	9.54978	FALSE	gi	16128915 GI:16128915	16128915 GI:16128915	ASAP:ABE-0003211|UniProtKB/Swiss-Prot:P75864|EcoGene:EG13717|GeneID:945564|						GCF_000005845.2_ASM584v2_genomic_29-OCT-2014 _iRT	>gi|16128915 GI:16128915|ASAP:ABE-0003211|UniProtKB/Swiss-Prot:P75864|EcoGene:EG13717|GeneID:945564|
2	_GLEELLK_	_GLEELLK_	GLEELLK	43.8792	16128915 GI:16128915	TRUE	_GLEELLK_	401.239	noloss	4	y	1	502.324	31.0589	FALSE	gi	16128915 GI:16128915	16128915 GI:16128915	ASAP:ABE-0003211|UniProtKB/Swiss-Prot:P75864|EcoGene:EG13717|GeneID:945564|						GCF_000005845.2_ASM584v2_genomic_29-OCT-2014 _iRT	>gi|16128915 GI:16128915|ASAP:ABE-0003211|UniProtKB/Swiss-Prot:P75864|EcoGene:EG13717|GeneID:945564|
2	_GLEELLK_	_GLEELLK_	GLEELLK	43.8792	16128915 GI:16128915	TRUE	_GLEELLK_	401.239	H2O	5	y	1	613.356	28.8757	FALSE	gi	16128915 GI:16128915	16128915 GI:16128915	ASAP:ABE-0003211|UniProtKB/Swiss-Prot:P75864|EcoGene:EG13717|GeneID:945564|						GCF_000005845.2_ASM584v2_genomic_29-OCT-2014 _iRT	>gi|16128915 GI:16128915|ASAP:ABE-0003211|UniProtKB/Swiss-Prot:P75864|EcoGene:EG13717|GeneID:945564|
2	_GLEELLK_	_GLEELLK_	GLEELLK	43.8792	16128915 GI:16128915	TRUE	_GLEELLK_	401.239	NH3	5	y	1	614.34	11.3151	FALSE	gi	16128915 GI:16128915	16128915 GI:16128915	ASAP:ABE-0003211|UniProtKB/Swiss-Prot:P75864|EcoGene:EG13717|GeneID:945564|						GCF_000005845.2_ASM584v2_genomic_29-OCT-2014 _iRT	>gi|16128915 GI:16128915|ASAP:ABE-0003211|UniProtKB/Swiss-Prot:P75864|EcoGene:EG13717|GeneID:945564|
2	_GLEELLK_	_GLEELLK_	GLEELLK	43.8792	16128915 GI:16128915	TRUE	_GLEELLK_	401.239	noloss	5	y	1	631.366	100	FALSE	gi	16128915 GI:16128915	16128915 GI:16128915	ASAP:ABE-0003211|UniProtKB/Swiss-Prot:P75864|EcoGene:EG13717|GeneID:945564|						GCF_000005845.2_ASM584v2_genomic_29-OCT-2014 _iRT	>gi|16128915 GI:16128915|ASAP:ABE-0003211|UniProtKB/Swiss-Prot:P75864|EcoGene:EG13717|GeneID:945564|
2	_TVGAGVVAK_	_TVGAGVVAK_	TVGAGVVAK	-26.9793	16131218 GI:16131218;16131810 GI:16131810	FALSE	_TVGAGVVAK_	401.245	H2O	4	b	1	311.171	10.4837	FALSE	gi	16131218 GI:16131218;16131810 GI:16131810	16131218 GI:16131218;16131810 GI:16131810	ASAP:ABE-0010912|UniProtKB/Swiss-Prot:P0CE47|EcoGene:EG11036|GeneID:947838|;ASAP:ABE-0013020|UniProtKB/Swiss-Prot:P0CE48|EcoGene:EG11037|GeneID:948482|						GCF_000005845.2_ASM584v2_genomic_29-OCT-2014 _iRT	>gi|16131218 GI:16131218|ASAP:ABE-0010912|UniProtKB/Swiss-Prot:P0CE47|EcoGene:EG11036|GeneID:947838|;>gi|16131810 GI:16131810|ASAP:ABE-0013020|UniProtKB/Swiss-Prot:P0CE48|EcoGene:EG11037|GeneID:948482|
2	_TVGAGVVAK_	_TVGAGVVAK_	TVGAGVVAK	-26.9793	16131218 GI:16131218;16131810 GI:16131810	FALSE	_TVGAGVVAK_	401.245	noloss	3	y	1	317.218	53.709	FALSE	gi	16131218 GI:16131218;16131810 GI:16131810	16131218 GI:16131218;16131810 GI:16131810	ASAP:ABE-0010912|UniProtKB/Swiss-Prot:P0CE47|EcoGene:EG11036|GeneID:947838|;ASAP:ABE-0013020|UniProtKB/Swiss-Prot:P0CE48|EcoGene:EG11037|GeneID:948482|						GCF_000005845.2_ASM584v2_genomic_29-OCT-2014 _iRT	>gi|16131218 GI:16131218|ASAP:ABE-0010912|UniProtKB/Swiss-Prot:P0CE47|EcoGene:EG11036|GeneID:947838|;>gi|16131810 GI:16131810|ASAP:ABE-0013020|UniProtKB/Swiss-Prot:P0CE48|EcoGene:EG11037|GeneID:948482|
2	_TVGAGVVAK_	_TVGAGVVAK_	TVGAGVVAK	-26.9793	16131218 GI:16131218;16131810 GI:16131810	FALSE	_TVGAGVVAK_	401.245	noloss	8	b	2	328.192	16.1453	FALSE	gi	16131218 GI:16131218;16131810 GI:16131810	16131218 GI:16131218;16131810 GI:16131810	ASAP:ABE-0010912|UniProtKB/Swiss-Prot:P0CE47|EcoGene:EG11036|GeneID:947838|;ASAP:ABE-0013020|UniProtKB/Swiss-Prot:P0CE48|EcoGene:EG11037|GeneID:948482|						GCF_000005845.2_ASM584v2_genomic_29-OCT-2014 _iRT	>gi|16131218 GI:16131218|ASAP:ABE-0010912|UniProtKB/Swiss-Prot:P0CE47|EcoGene:EG11036|GeneID:947838|;>gi|16131810 GI:16131810|ASAP:ABE-0013020|UniProtKB/Swiss-Prot:P0CE48|EcoGene:EG11037|GeneID:948482|
2	_TVGAGVVAK_	_TVGAGVVAK_	TVGAGVVAK	-26.9793	16131218 GI:16131218;16131810 GI:16131810	FALSE	_TVGAGVVAK_	401.245	noloss	4	y	1	416.287	5.40098	TRUE	gi	16131218 GI:16131218;16131810 GI:16131810	16131218 GI:16131218;16131810 GI:16131810	ASAP:ABE-0010912|UniProtKB/Swiss-Prot:P0CE47|EcoGene:EG11036|GeneID:947838|;ASAP:ABE-0013020|UniProtKB/Swiss-Prot:P0CE48|EcoGene:EG11037|GeneID:948482|						GCF_000005845.2_ASM584v2_genomic_29-OCT-2014 _iRT	>gi|16131218 GI:16131218|ASAP:ABE-0010912|UniProtKB/Swiss-Prot:P0CE47|EcoGene:EG11036|GeneID:947838|;>gi|16131810 GI:16131810|ASAP:ABE-0013020|UniProtKB/Swiss-Prot:P0CE48|EcoGene:EG11037|GeneID:948482|
2	_TVGAGVVAK_	_TVGAGVVAK_	TVGAGVVAK	-26.9793	16131218 GI:16131218;16131810 GI:16131810	FALSE	_TVGAGVVAK_	401.245	noloss	5	y	1	473.308	14.5573	FALSE	gi	16131218 GI:16131218;16131810 GI:16131810	16131218 GI:16131218;16131810 GI:16131810	ASAP:ABE-0010912|UniProtKB/Swiss-Prot:P0CE47|EcoGene:EG11036|GeneID:947838|;ASAP:ABE-0013020|UniProtKB/Swiss-Prot:P0CE48|EcoGene:EG11037|GeneID:948482|						GCF_000005845.2_ASM584v2_genomic_29-OCT-2014 _iRT	>gi|16131218 GI:16131218|ASAP:ABE-0010912|UniProtKB/Swiss-Prot:P0CE47|EcoGene:EG11036|GeneID:947838|;>gi|16131810 GI:16131810|ASAP:ABE-0013020|UniProtKB/Swiss-Prot:P0CE48|EcoGene:EG11037|GeneID:948482|
2	_TVGAGVVAK_	_TVGAGVVAK_	TVGAGVVAK	-26.9793	16131218 GI:16131218;16131810 GI:16131810	FALSE	_TVGAGVVAK_	401.245	noloss	6	y	1	544.345	6.17769	FALSE	gi	16131218 GI:16131218;16131810 GI:16131810	16131218 GI:16131218;16131810 GI:16131810	ASAP:ABE-0010912|UniProtKB/Swiss-Prot:P0CE47|EcoGene:EG11036|GeneID:947838|;ASAP:ABE-0013020|UniProtKB/Swiss-Prot:P0CE48|EcoGene:EG11037|GeneID:948482|						GCF_000005845.2_ASM584v2_genomic_29-OCT-2014 _iRT	>gi|16131218 GI:16131218|ASAP:ABE-0010912|UniProtKB/Swiss-Prot:P0CE47|EcoGene:EG11036|GeneID:947838|;>gi|16131810 GI:16131810|ASAP:ABE-0013020|UniProtKB/Swiss-Prot:P0CE48|EcoGene:EG11037|GeneID:948482|
2	_TVGAGVVAK_	_TVGAGVVAK_	TVGAGVVAK	-26.9793	16131218 GI:16131218;16131810 GI:16131810	FALSE	_TVGAGVVAK_	401.245	noloss	7	y	1	601.367	100	FALSE	gi	16131218 GI:16131218;16131810 GI:16131810	16131218 GI:16131218;16131810 GI:16131810	ASAP:ABE-0010912|UniProtKB/Swiss-Prot:P0CE47|EcoGene:EG11036|GeneID:947838|;ASAP:ABE-0013020|UniProtKB/Swiss-Prot:P0CE48|EcoGene:EG11037|GeneID:948482|						GCF_000005845.2_ASM584v2_genomic_29-OCT-2014 _iRT	>gi|16131218 GI:16131218|ASAP:ABE-0010912|UniProtKB/Swiss-Prot:P0CE47|EcoGene:EG11036|GeneID:947838|;>gi|16131810 GI:16131810|ASAP:ABE-0013020|UniProtKB/Swiss-Prot:P0CE48|EcoGene:EG11037|GeneID:948482|
2	_TLLDIAR_	_TLLDIAR_	TLLDIAR	30.5194	16129077 GI:16129077	TRUE	_TLLDIAR_	401.245	NH3	3	y	1	342.214	7.73116	FALSE	gi	16129077 GI:16129077	16129077 GI:16129077	ASAP:ABE-0003763|UniProtKB/Swiss-Prot:P30958|EcoGene:EG11619|GeneID:945681|						GCF_000005845.2_ASM584v2_genomic_29-OCT-2014 _iRT	>gi|16129077 GI:16129077|ASAP:ABE-0003763|UniProtKB/Swiss-Prot:P30958|EcoGene:EG11619|GeneID:945681|
2	_TLLDIAR_	_TLLDIAR_	TLLDIAR	30.5194	16129077 GI:16129077	TRUE	_TLLDIAR_	401.245	noloss	3	y	1	359.24	54.1894	FALSE	gi	16129077 GI:16129077	16129077 GI:16129077	ASAP:ABE-0003763|UniProtKB/Swiss-Prot:P30958|EcoGene:EG11619|GeneID:945681|						GCF_000005845.2_ASM584v2_genomic_29-OCT-2014 _iRT	>gi|16129077 GI:16129077|ASAP:ABE-0003763|UniProtKB/Swiss-Prot:P30958|EcoGene:EG11619|GeneID:945681|
2	_TLLDIAR_	_TLLDIAR_	TLLDIAR	30.5194	16129077 GI:16129077	TRUE	_TLLDIAR_	401.245	noloss	4	y	1	474.267	40.1702	FALSE	gi	16129077 GI:16129077	16129077 GI:16129077	ASAP:ABE-0003763|UniProtKB/Swiss-Prot:P30958|EcoGene:EG11619|GeneID:945681|						GCF_000005845.2_ASM584v2_genomic_29-OCT-2014 _iRT	>gi|16129077 GI:16129077|ASAP:ABE-0003763|UniProtKB/Swiss-Prot:P30958|EcoGene:EG11619|GeneID:945681|
2	_TLLDIAR_	_TLLDIAR_	TLLDIAR	30.5194	16129077 GI:16129077	TRUE	_TLLDIAR_	401.245	noloss	5	y	1	587.351	100	FALSE	gi	16129077 GI:16129077	16129077 GI:16129077	ASAP:ABE-0003763|UniProtKB/Swiss-Prot:P30958|EcoGene:EG11619|GeneID:945681|						GCF_000005845.2_ASM584v2_genomic_29-OCT-2014 _iRT	>gi|16129077 GI:16129077|ASAP:ABE-0003763|UniProtKB/Swiss-Prot:P30958|EcoGene:EG11619|GeneID:945681|
2	_TLLDIAR_	_TLLDIAR_	TLLDIAR	30.5194	16129077 GI:16129077	TRUE	_TLLDIAR_	401.245	noloss	6	y	1	700.435	6.56154	FALSE	gi	16129077 GI:16129077	16129077 GI:16129077	ASAP:ABE-0003763|UniProtKB/Swiss-Prot:P30958|EcoGene:EG11619|GeneID:945681|						GCF_000005845.2_ASM584v2_genomic_29-OCT-2014 _iRT	>gi|16129077 GI:16129077|ASAP:ABE-0003763|UniProtKB/Swiss-Prot:P30958|EcoGene:EG11619|GeneID:945681|
2	_IAEEGQR_	_IAEEGQR_	IAEEGQR	-51.328	16130343 GI:16130343	TRUE	_IAEEGQR_	401.706	NH3	3	y	1	343.172	7.14554	FALSE	gi	16130343 GI:16130343	16130343 GI:16130343	ASAP:ABE-0007971|UniProtKB/Swiss-Prot:P69783|EcoGene:EG10165|GeneID:946880|						GCF_000005845.2_ASM584v2_genomic_29-OCT-2014 _iRT	>gi|16130343 GI:16130343|ASAP:ABE-0007971|UniProtKB/Swiss-Prot:P69783|EcoGene:EG10165|GeneID:946880|
2	_IAEEGQR_	_IAEEGQR_	IAEEGQR	-51.328	16130343 GI:16130343	TRUE	_IAEEGQR_	401.706	noloss	3	y	1	360.199	34.3357	FALSE	gi	16130343 GI:16130343	16130343 GI:16130343	ASAP:ABE-0007971|UniProtKB/Swiss-Prot:P69783|EcoGene:EG10165|GeneID:946880|						GCF_000005845.2_ASM584v2_genomic_29-OCT-2014 _iRT	>gi|16130343 GI:16130343|ASAP:ABE-0007971|UniProtKB/Swiss-Prot:P69783|EcoGene:EG10165|GeneID:946880|
2	_IAEEGQR_	_IAEEGQR_	IAEEGQR	-51.328	16130343 GI:16130343	TRUE	_IAEEGQR_	401.706	noloss	4	y	1	489.242	33.7832	FALSE	gi	16130343 GI:16130343	16130343 GI:16130343	ASAP:ABE-0007971|UniProtKB/Swiss-Prot:P69783|EcoGene:EG10165|GeneID:946880|						GCF_000005845.2_ASM584v2_genomic_29-OCT-2014 _iRT	>gi|16130343 GI:16130343|ASAP:ABE-0007971|UniProtKB/Swiss-Prot:P69783|EcoGene:EG10165|GeneID:946880|
2	_IAEEGQR_	_IAEEGQR_	IAEEGQR	-51.328	16130343 GI:16130343	TRUE	_IAEEGQR_	401.706	H2O	5	y	1	600.274	12.4272	FALSE	gi	16130343 GI:16130343	16130343 GI:16130343	ASAP:ABE-0007971|UniProtKB/Swiss-Prot:P69783|EcoGene:EG10165|GeneID:946880|						GCF_000005845.2_ASM584v2_genomic_29-OCT-2014 _iRT	>gi|16130343 GI:16130343|ASAP:ABE-0007971|UniProtKB/Swiss-Prot:P69783|EcoGene:EG10165|GeneID:946880|
2	_IAEEGQR_	_IAEEGQR_	IAEEGQR	-51.328	16130343 GI:16130343	TRUE	_IAEEGQR_	401.706	NH3	5	y	1	601.258	6.12189	TRUE	gi	16130343 GI:16130343	16130343 GI:16130343	ASAP:ABE-0007971|UniProtKB/Swiss-Prot:P69783|EcoGene:EG10165|GeneID:946880|						GCF_000005845.2_ASM584v2_genomic_29-OCT-2014 _iRT	>gi|16130343 GI:16130343|ASAP:ABE-0007971|UniProtKB/Swiss-Prot:P69783|EcoGene:EG10165|GeneID:946880|
2	_IAEEGQR_	_IAEEGQR_	IAEEGQR	-51.328	16130343 GI:16130343	TRUE	_IAEEGQR_	401.706	noloss	5	y	1	618.284	75.1568	FALSE	gi	16130343 GI:16130343	16130343 GI:16130343	ASAP:ABE-0007971|UniProtKB/Swiss-Prot:P69783|EcoGene:EG10165|GeneID:946880|						GCF_000005845.2_ASM584v2_genomic_29-OCT-2014 _iRT	>gi|16130343 GI:16130343|ASAP:ABE-0007971|UniProtKB/Swiss-Prot:P69783|EcoGene:EG10165|GeneID:946880|
2	_IAEEGQR_	_IAEEGQR_	IAEEGQR	-51.328	16130343 GI:16130343	TRUE	_IAEEGQR_	401.706	noloss	6	y	1	689.321	100	FALSE	gi	16130343 GI:16130343	16130343 GI:16130343	ASAP:ABE-0007971|UniProtKB/Swiss-Prot:P69783|EcoGene:EG10165|GeneID:946880|						GCF_000005845.2_ASM584v2_genomic_29-OCT-2014 _iRT	>gi|16130343 GI:16130343|ASAP:ABE-0007971|UniProtKB/Swiss-Prot:P69783|EcoGene:EG10165|GeneID:946880|
2	_AEIDQVK_	_AEIDQVK_	AEIDQVK	-27.4951	16130805 GI:16130805	TRUE	_AEIDQVK_	401.719	H2O	3	y	1	356.229	29.2581	FALSE	gi	16130805 GI:16130805	16130805 GI:16130805	ASAP:ABE-0009531|UniProtKB/Swiss-Prot:P33195|EcoGene:EG11810|GeneID:947394|						GCF_000005845.2_ASM584v2_genomic_29-OCT-2014 _iRT	>gi|16130805 GI:16130805|ASAP:ABE-0009531|UniProtKB/Swiss-Prot:P33195|EcoGene:EG11810|GeneID:947394|
2	_AEIDQVK_	_AEIDQVK_	AEIDQVK	-27.4951	16130805 GI:16130805	TRUE	_AEIDQVK_	401.719	NH3	3	y	1	357.213	25.4817	FALSE	gi	16130805 GI:16130805	16130805 GI:16130805	ASAP:ABE-0009531|UniProtKB/Swiss-Prot:P33195|EcoGene:EG11810|GeneID:947394|						GCF_000005845.2_ASM584v2_genomic_29-OCT-2014 _iRT	>gi|16130805 GI:16130805|ASAP:ABE-0009531|UniProtKB/Swiss-Prot:P33195|EcoGene:EG11810|GeneID:947394|
2	_AEIDQVK_	_AEIDQVK_	AEIDQVK	-27.4951	16130805 GI:16130805	TRUE	_AEIDQVK_	401.719	noloss	3	y	1	374.24	15.6247	TRUE	gi	16130805 GI:16130805	16130805 GI:16130805	ASAP:ABE-0009531|UniProtKB/Swiss-Prot:P33195|EcoGene:EG11810|GeneID:947394|						GCF_000005845.2_ASM584v2_genomic_29-OCT-2014 _iRT	>gi|16130805 GI:16130805|ASAP:ABE-0009531|UniProtKB/Swiss-Prot:P33195|EcoGene:EG11810|GeneID:947394|
2	_AEIDQVK_	_AEIDQVK_	AEIDQVK	-27.4951	16130805 GI:16130805	TRUE	_AEIDQVK_	401.719	NH3	4	b	1	412.171	44.6864	FALSE	gi	16130805 GI:16130805	16130805 GI:16130805	ASAP:ABE-0009531|UniProtKB/Swiss-Prot:P33195|EcoGene:EG11810|GeneID:947394|						GCF_000005845.2_ASM584v2_genomic_29-OCT-2014 _iRT	>gi|16130805 GI:16130805|ASAP:ABE-0009531|UniProtKB/Swiss-Prot:P33195|EcoGene:EG11810|GeneID:947394|
2	_AEIDQVK_	_AEIDQVK_	AEIDQVK	-27.4951	16130805 GI:16130805	TRUE	_AEIDQVK_	401.719	NH3	4	y	1	472.24	10.7872	TRUE	gi	16130805 GI:16130805	16130805 GI:16130805	ASAP:ABE-0009531|UniProtKB/Swiss-Prot:P33195|EcoGene:EG11810|GeneID:947394|						GCF_000005845.2_ASM584v2_genomic_29-OCT-2014 _iRT	>gi|16130805 GI:16130805|ASAP:ABE-0009531|UniProtKB/Swiss-Prot:P33195|EcoGene:EG11810|GeneID:947394|
2	_AEIDQVK_	_AEIDQVK_	AEIDQVK	-27.4951	16130805 GI:16130805	TRUE	_AEIDQVK_	401.719	noloss	4	y	1	489.267	87.0636	FALSE	gi	16130805 GI:16130805	16130805 GI:16130805	ASAP:ABE-0009531|UniProtKB/Swiss-Prot:P33195|EcoGene:EG11810|GeneID:947394|						GCF_000005845.2_ASM584v2_genomic_29-OCT-2014 _iRT	>gi|16130805 GI:16130805|ASAP:ABE-0009531|UniProtKB/Swiss-Prot:P33195|EcoGene:EG11810|GeneID:947394|
2	_AEIDQVK_	_AEIDQVK_	AEIDQVK	-27.4951	16130805 GI:16130805	TRUE	_AEIDQVK_	401.719	H2O	5	y	1	584.34	5.04157	TRUE	gi	16130805 GI:16130805	16130805 GI:16130805	ASAP:ABE-0009531|UniProtKB/Swiss-Prot:P33195|EcoGene:EG11810|GeneID:947394|						GCF_000005845.2_ASM584v2_genomic_29-OCT-2014 _iRT	>gi|16130805 GI:16130805|ASAP:ABE-0009531|UniProtKB/Swiss-Prot:P33195|EcoGene:EG11810|GeneID:947394|
2	_AEIDQVK_	_AEIDQVK_	AEIDQVK	-27.4951	16130805 GI:16130805	TRUE	_AEIDQVK_	401.719	noloss	5	y	1	602.351	100	FALSE	gi	16130805 GI:16130805	16130805 GI:16130805	ASAP:ABE-0009531|UniProtKB/Swiss-Prot:P33195|EcoGene:EG11810|GeneID:947394|						GCF_000005845.2_ASM584v2_genomic_29-OCT-2014 _iRT	>gi|16130805 GI:16130805|ASAP:ABE-0009531|UniProtKB/Swiss-Prot:P33195|EcoGene:EG11810|GeneID:947394|
2	_AEIDQVK_	_AEIDQVK_	AEIDQVK	-27.4951	16130805 GI:16130805	TRUE	_AEIDQVK_	401.719	H2O	6	y	1	713.383	14.8725	TRUE	gi	16130805 GI:16130805	16130805 GI:16130805	ASAP:ABE-0009531|UniProtKB/Swiss-Prot:P33195|EcoGene:EG11810|GeneID:947394|						GCF_000005845.2_ASM584v2_genomic_29-OCT-2014 _iRT	>gi|16130805 GI:16130805|ASAP:ABE-0009531|UniProtKB/Swiss-Prot:P33195|EcoGene:EG11810|GeneID:947394|
2	_AEIDQVK_	_AEIDQVK_	AEIDQVK	-27.4951	16130805 GI:16130805	TRUE	_AEIDQVK_	401.719	NH3	6	y	1	714.367	6.54062	TRUE	gi	16130805 GI:16130805	16130805 GI:16130805	ASAP:ABE-0009531|UniProtKB/Swiss-Prot:P33195|EcoGene:EG11810|GeneID:947394|						GCF_000005845.2_ASM584v2_genomic_29-OCT-2014 _iRT	>gi|16130805 GI:16130805|ASAP:ABE-0009531|UniProtKB/Swiss-Prot:P33195|EcoGene:EG11810|GeneID:947394|
2	_AEIDQVK_	_AEIDQVK_	AEIDQVK	-27.4951	16130805 GI:16130805	TRUE	_AEIDQVK_	401.719	noloss	6	y	1	731.393	18.1317	FALSE	gi	16130805 GI:16130805	16130805 GI:16130805	ASAP:ABE-0009531|UniProtKB/Swiss-Prot:P33195|EcoGene:EG11810|GeneID:947394|						GCF_000005845.2_ASM584v2_genomic_29-OCT-2014 _iRT	>gi|16130805 GI:16130805|ASAP:ABE-0009531|UniProtKB/Swiss-Prot:P33195|EcoGene:EG11810|GeneID:947394|
2	_AEIDQVK_	_AEIDQVK_	AEIDQVK	-27.4951	16130805 GI:16130805	TRUE	_AEIDQVK_	401.719	NH3	5	y	1	585.324	11.2261	TRUE	gi	16130805 GI:16130805	16130805 GI:16130805	ASAP:ABE-0009531|UniProtKB/Swiss-Prot:P33195|EcoGene:EG11810|GeneID:947394|						GCF_000005845.2_ASM584v2_genomic_29-OCT-2014 _iRT	>gi|16130805 GI:16130805|ASAP:ABE-0009531|UniProtKB/Swiss-Prot:P33195|EcoGene:EG11810|GeneID:947394|
2	_LSQDLAR_	_LSQDLAR_	LSQDLAR	-22.8498	90111528 GI:90111528	TRUE	_LSQDLAR_	401.725	NH3	3	y	1	342.214	8.42576	TRUE	gi	90111528 GI:90111528	90111528 GI:90111528	ASAP:ABE-0009965|UniProtKB/Swiss-Prot:P02930|EcoGene:EG11009|GeneID:947521|						GCF_000005845.2_ASM584v2_genomic_29-OCT-2014 _iRT	>gi|90111528 GI:90111528|ASAP:ABE-0009965|UniProtKB/Swiss-Prot:P02930|EcoGene:EG11009|GeneID:947521|
2	_LSQDLAR_	_LSQDLAR_	LSQDLAR	-22.8498	90111528 GI:90111528	TRUE	_LSQDLAR_	401.725	noloss	3	y	1	359.24	100	FALSE	gi	90111528 GI:90111528	90111528 GI:90111528	ASAP:ABE-0009965|UniProtKB/Swiss-Prot:P02930|EcoGene:EG11009|GeneID:947521|						GCF_000005845.2_ASM584v2_genomic_29-OCT-2014 _iRT	>gi|90111528 GI:90111528|ASAP:ABE-0009965|UniProtKB/Swiss-Prot:P02930|EcoGene:EG11009|GeneID:947521|
2	_LSQDLAR_	_LSQDLAR_	LSQDLAR	-22.8498	90111528 GI:90111528	TRUE	_LSQDLAR_	401.725	noloss	4	y	1	474.267	38.6158	FALSE	gi	90111528 GI:90111528	90111528 GI:90111528	ASAP:ABE-0009965|UniProtKB/Swiss-Prot:P02930|EcoGene:EG11009|GeneID:947521|						GCF_000005845.2_ASM584v2_genomic_29-OCT-2014 _iRT	>gi|90111528 GI:90111528|ASAP:ABE-0009965|UniProtKB/Swiss-Prot:P02930|EcoGene:EG11009|GeneID:947521|
2	_LSQDLAR_	_LSQDLAR_	LSQDLAR	-22.8498	90111528 GI:90111528	TRUE	_LSQDLAR_	401.725	H2O	5	y	1	584.315	6.20091	TRUE	gi	90111528 GI:90111528	90111528 GI:90111528	ASAP:ABE-0009965|UniProtKB/Swiss-Prot:P02930|EcoGene:EG11009|GeneID:947521|						GCF_000005845.2_ASM584v2_genomic_29-OCT-2014 _iRT	>gi|90111528 GI:90111528|ASAP:ABE-0009965|UniProtKB/Swiss-Prot:P02930|EcoGene:EG11009|GeneID:947521|
2	_LSQDLAR_	_LSQDLAR_	LSQDLAR	-22.8498	90111528 GI:90111528	TRUE	_LSQDLAR_	401.725	NH3	5	y	1	585.299	20.0268	FALSE	gi	90111528 GI:90111528	90111528 GI:90111528	ASAP:ABE-0009965|UniProtKB/Swiss-Prot:P02930|EcoGene:EG11009|GeneID:947521|						GCF_000005845.2_ASM584v2_genomic_29-OCT-2014 _iRT	>gi|90111528 GI:90111528|ASAP:ABE-0009965|UniProtKB/Swiss-Prot:P02930|EcoGene:EG11009|GeneID:947521|
2	_LSQDLAR_	_LSQDLAR_	LSQDLAR	-22.8498	90111528 GI:90111528	TRUE	_LSQDLAR_	401.725	noloss	5	y	1	602.326	42.1721	FALSE	gi	90111528 GI:90111528	90111528 GI:90111528	ASAP:ABE-0009965|UniProtKB/Swiss-Prot:P02930|EcoGene:EG11009|GeneID:947521|						GCF_000005845.2_ASM584v2_genomic_29-OCT-2014 _iRT	>gi|90111528 GI:90111528|ASAP:ABE-0009965|UniProtKB/Swiss-Prot:P02930|EcoGene:EG11009|GeneID:947521|
2	_LSQDLAR_	_LSQDLAR_	LSQDLAR	-22.8498	90111528 GI:90111528	TRUE	_LSQDLAR_	401.725	H2O	6	y	1	671.347	8.90568	TRUE	gi	90111528 GI:90111528	90111528 GI:90111528	ASAP:ABE-0009965|UniProtKB/Swiss-Prot:P02930|EcoGene:EG11009|GeneID:947521|						GCF_000005845.2_ASM584v2_genomic_29-OCT-2014 _iRT	>gi|90111528 GI:90111528|ASAP:ABE-0009965|UniProtKB/Swiss-Prot:P02930|EcoGene:EG11009|GeneID:947521|
2	_LSQDLAR_	_LSQDLAR_	LSQDLAR	-22.8498	90111528 GI:90111528	TRUE	_LSQDLAR_	401.725	NH3	6	y	1	672.331	11.8433	FALSE	gi	90111528 GI:90111528	90111528 GI:90111528	ASAP:ABE-0009965|UniProtKB/Swiss-Prot:P02930|EcoGene:EG11009|GeneID:947521|						GCF_000005845.2_ASM584v2_genomic_29-OCT-2014 _iRT	>gi|90111528 GI:90111528|ASAP:ABE-0009965|UniProtKB/Swiss-Prot:P02930|EcoGene:EG11009|GeneID:947521|
2	_LSQDLAR_	_LSQDLAR_	LSQDLAR	-22.8498	90111528 GI:90111528	TRUE	_LSQDLAR_	401.725	noloss	6	y	1	689.358	90.1252	FALSE	gi	90111528 GI:90111528	90111528 GI:90111528	ASAP:ABE-0009965|UniProtKB/Swiss-Prot:P02930|EcoGene:EG11009|GeneID:947521|						GCF_000005845.2_ASM584v2_genomic_29-OCT-2014 _iRT	>gi|90111528 GI:90111528|ASAP:ABE-0009965|UniProtKB/Swiss-Prot:P02930|EcoGene:EG11009|GeneID:947521|
2	_ALTLQEK_	_ALTLQEK_	ALTLQEK	-15.2359	90111528 GI:90111528	TRUE	_ALTLQEK_	401.737	H2O	6	y	2	357.213	10.7489	FALSE	gi	90111528 GI:90111528	90111528 GI:90111528	ASAP:ABE-0009965|UniProtKB/Swiss-Prot:P02930|EcoGene:EG11009|GeneID:947521|						GCF_000005845.2_ASM584v2_genomic_29-OCT-2014 _iRT	>gi|90111528 GI:90111528|ASAP:ABE-0009965|UniProtKB/Swiss-Prot:P02930|EcoGene:EG11009|GeneID:947521|
2	_ALTLQEK_	_ALTLQEK_	ALTLQEK	-15.2359	90111528 GI:90111528	TRUE	_ALTLQEK_	401.737	H2O	3	y	1	386.203	44.184	FALSE	gi	90111528 GI:90111528	90111528 GI:90111528	ASAP:ABE-0009965|UniProtKB/Swiss-Prot:P02930|EcoGene:EG11009|GeneID:947521|						GCF_000005845.2_ASM584v2_genomic_29-OCT-2014 _iRT	>gi|90111528 GI:90111528|ASAP:ABE-0009965|UniProtKB/Swiss-Prot:P02930|EcoGene:EG11009|GeneID:947521|
2	_ALTLQEK_	_ALTLQEK_	ALTLQEK	-15.2359	90111528 GI:90111528	TRUE	_ALTLQEK_	401.737	NH3	3	y	1	387.187	59.1141	FALSE	gi	90111528 GI:90111528	90111528 GI:90111528	ASAP:ABE-0009965|UniProtKB/Swiss-Prot:P02930|EcoGene:EG11009|GeneID:947521|						GCF_000005845.2_ASM584v2_genomic_29-OCT-2014 _iRT	>gi|90111528 GI:90111528|ASAP:ABE-0009965|UniProtKB/Swiss-Prot:P02930|EcoGene:EG11009|GeneID:947521|
2	_ALTLQEK_	_ALTLQEK_	ALTLQEK	-15.2359	90111528 GI:90111528	TRUE	_ALTLQEK_	401.737	noloss	3	y	1	404.214	30.9156	FALSE	gi	90111528 GI:90111528	90111528 GI:90111528	ASAP:ABE-0009965|UniProtKB/Swiss-Prot:P02930|EcoGene:EG11009|GeneID:947521|						GCF_000005845.2_ASM584v2_genomic_29-OCT-2014 _iRT	>gi|90111528 GI:90111528|ASAP:ABE-0009965|UniProtKB/Swiss-Prot:P02930|EcoGene:EG11009|GeneID:947521|
2	_ALTLQEK_	_ALTLQEK_	ALTLQEK	-15.2359	90111528 GI:90111528	TRUE	_ALTLQEK_	401.737	H2O	4	y	1	499.287	5.48179	TRUE	gi	90111528 GI:90111528	90111528 GI:90111528	ASAP:ABE-0009965|UniProtKB/Swiss-Prot:P02930|EcoGene:EG11009|GeneID:947521|						GCF_000005845.2_ASM584v2_genomic_29-OCT-2014 _iRT	>gi|90111528 GI:90111528|ASAP:ABE-0009965|UniProtKB/Swiss-Prot:P02930|EcoGene:EG11009|GeneID:947521|
2	_ALTLQEK_	_ALTLQEK_	ALTLQEK	-15.2359	90111528 GI:90111528	TRUE	_ALTLQEK_	401.737	NH3	4	y	1	500.271	8.65615	TRUE	gi	90111528 GI:90111528	90111528 GI:90111528	ASAP:ABE-0009965|UniProtKB/Swiss-Prot:P02930|EcoGene:EG11009|GeneID:947521|						GCF_000005845.2_ASM584v2_genomic_29-OCT-2014 _iRT	>gi|90111528 GI:90111528|ASAP:ABE-0009965|UniProtKB/Swiss-Prot:P02930|EcoGene:EG11009|GeneID:947521|
2	_ALTLQEK_	_ALTLQEK_	ALTLQEK	-15.2359	90111528 GI:90111528	TRUE	_ALTLQEK_	401.737	noloss	4	y	1	517.298	40.7874	FALSE	gi	90111528 GI:90111528	90111528 GI:90111528	ASAP:ABE-0009965|UniProtKB/Swiss-Prot:P02930|EcoGene:EG11009|GeneID:947521|						GCF_000005845.2_ASM584v2_genomic_29-OCT-2014 _iRT	>gi|90111528 GI:90111528|ASAP:ABE-0009965|UniProtKB/Swiss-Prot:P02930|EcoGene:EG11009|GeneID:947521|
2	_ALTLQEK_	_ALTLQEK_	ALTLQEK	-15.2359	90111528 GI:90111528	TRUE	_ALTLQEK_	401.737	H2O	5	y	1	600.335	5.28915	TRUE	gi	90111528 GI:90111528	90111528 GI:90111528	ASAP:ABE-0009965|UniProtKB/Swiss-Prot:P02930|EcoGene:EG11009|GeneID:947521|						GCF_000005845.2_ASM584v2_genomic_29-OCT-2014 _iRT	>gi|90111528 GI:90111528|ASAP:ABE-0009965|UniProtKB/Swiss-Prot:P02930|EcoGene:EG11009|GeneID:947521|
2	_ALTLQEK_	_ALTLQEK_	ALTLQEK	-15.2359	90111528 GI:90111528	TRUE	_ALTLQEK_	401.737	noloss	5	y	1	618.346	100	FALSE	gi	90111528 GI:90111528	90111528 GI:90111528	ASAP:ABE-0009965|UniProtKB/Swiss-Prot:P02930|EcoGene:EG11009|GeneID:947521|						GCF_000005845.2_ASM584v2_genomic_29-OCT-2014 _iRT	>gi|90111528 GI:90111528|ASAP:ABE-0009965|UniProtKB/Swiss-Prot:P02930|EcoGene:EG11009|GeneID:947521|
2	_ALTLQEK_	_ALTLQEK_	ALTLQEK	-15.2359	90111528 GI:90111528	TRUE	_ALTLQEK_	401.737	H2O	6	y	1	713.419	5.39347	TRUE	gi	90111528 GI:90111528	90111528 GI:90111528	ASAP:ABE-0009965|UniProtKB/Swiss-Prot:P02930|EcoGene:EG11009|GeneID:947521|						GCF_000005845.2_ASM584v2_genomic_29-OCT-2014 _iRT	>gi|90111528 GI:90111528|ASAP:ABE-0009965|UniProtKB/Swiss-Prot:P02930|EcoGene:EG11009|GeneID:947521|
2	_ALTLQEK_	_ALTLQEK_	ALTLQEK	-15.2359	90111528 GI:90111528	TRUE	_ALTLQEK_	401.737	noloss	6	y	1	731.43	6.8186	TRUE	gi	90111528 GI:90111528	90111528 GI:90111528	ASAP:ABE-0009965|UniProtKB/Swiss-Prot:P02930|EcoGene:EG11009|GeneID:947521|						GCF_000005845.2_ASM584v2_genomic_29-OCT-2014 _iRT	>gi|90111528 GI:90111528|ASAP:ABE-0009965|UniProtKB/Swiss-Prot:P02930|EcoGene:EG11009|GeneID:947521|
2	_GAITIATR_	_GAITIATR_	GAITIATR	-5.94717	16128107 GI:16128107	TRUE	_GAITIATR_	401.743	H2O	4	b	1	325.187	7.62172	FALSE	gi	16128107 GI:16128107	16128107 GI:16128107	ASAP:ABE-0000397|UniProtKB/Swiss-Prot:P0AFG8|EcoGene:EG10024|GeneID:944834|						GCF_000005845.2_ASM584v2_genomic_29-OCT-2014 _iRT	>gi|16128107 GI:16128107|ASAP:ABE-0000397|UniProtKB/Swiss-Prot:P0AFG8|EcoGene:EG10024|GeneID:944834|
2	_GAITIATR_	_GAITIATR_	GAITIATR	-5.94717	16128107 GI:16128107	TRUE	_GAITIATR_	401.743	NH3	3	y	1	330.177	10.5	FALSE	gi	16128107 GI:16128107	16128107 GI:16128107	ASAP:ABE-0000397|UniProtKB/Swiss-Prot:P0AFG8|EcoGene:EG10024|GeneID:944834|						GCF_000005845.2_ASM584v2_genomic_29-OCT-2014 _iRT	>gi|16128107 GI:16128107|ASAP:ABE-0000397|UniProtKB/Swiss-Prot:P0AFG8|EcoGene:EG10024|GeneID:944834|
2	_GAITIATR_	_GAITIATR_	GAITIATR	-5.94717	16128107 GI:16128107	TRUE	_GAITIATR_	401.743	noloss	4	b	1	343.198	5.06987	TRUE	gi	16128107 GI:16128107	16128107 GI:16128107	ASAP:ABE-0000397|UniProtKB/Swiss-Prot:P0AFG8|EcoGene:EG10024|GeneID:944834|						GCF_000005845.2_ASM584v2_genomic_29-OCT-2014 _iRT	>gi|16128107 GI:16128107|ASAP:ABE-0000397|UniProtKB/Swiss-Prot:P0AFG8|EcoGene:EG10024|GeneID:944834|
2	_GAITIATR_	_GAITIATR_	GAITIATR	-5.94717	16128107 GI:16128107	TRUE	_GAITIATR_	401.743	noloss	3	y	1	347.204	34.9357	FALSE	gi	16128107 GI:16128107	16128107 GI:16128107	ASAP:ABE-0000397|UniProtKB/Swiss-Prot:P0AFG8|EcoGene:EG10024|GeneID:944834|						GCF_000005845.2_ASM584v2_genomic_29-OCT-2014 _iRT	>gi|16128107 GI:16128107|ASAP:ABE-0000397|UniProtKB/Swiss-Prot:P0AFG8|EcoGene:EG10024|GeneID:944834|
2	_GAITIATR_	_GAITIATR_	GAITIATR	-5.94717	16128107 GI:16128107	TRUE	_GAITIATR_	401.743	noloss	4	y	1	460.288	45.1821	FALSE	gi	16128107 GI:16128107	16128107 GI:16128107	ASAP:ABE-0000397|UniProtKB/Swiss-Prot:P0AFG8|EcoGene:EG10024|GeneID:944834|						GCF_000005845.2_ASM584v2_genomic_29-OCT-2014 _iRT	>gi|16128107 GI:16128107|ASAP:ABE-0000397|UniProtKB/Swiss-Prot:P0AFG8|EcoGene:EG10024|GeneID:944834|
2	_GAITIATR_	_GAITIATR_	GAITIATR	-5.94717	16128107 GI:16128107	TRUE	_GAITIATR_	401.743	noloss	5	y	1	561.335	100	FALSE	gi	16128107 GI:16128107	16128107 GI:16128107	ASAP:ABE-0000397|UniProtKB/Swiss-Prot:P0AFG8|EcoGene:EG10024|GeneID:944834|						GCF_000005845.2_ASM584v2_genomic_29-OCT-2014 _iRT	>gi|16128107 GI:16128107|ASAP:ABE-0000397|UniProtKB/Swiss-Prot:P0AFG8|EcoGene:EG10024|GeneID:944834|
2	_GAITIATR_	_GAITIATR_	GAITIATR	-5.94717	16128107 GI:16128107	TRUE	_GAITIATR_	401.743	noloss	6	y	1	674.42	13.9612	FALSE	gi	16128107 GI:16128107	16128107 GI:16128107	ASAP:ABE-0000397|UniProtKB/Swiss-Prot:P0AFG8|EcoGene:EG10024|GeneID:944834|						GCF_000005845.2_ASM584v2_genomic_29-OCT-2014 _iRT	>gi|16128107 GI:16128107|ASAP:ABE-0000397|UniProtKB/Swiss-Prot:P0AFG8|EcoGene:EG10024|GeneID:944834|
2	_QLIMLGK_	_QLIMLGK_	QLIMLGK	23.9429	16130718 GI:16130718	TRUE	_QLIMLGK_	401.746	noloss	3	y	1	317.218	100	FALSE	gi	16130718 GI:16130718	16130718 GI:16130718	ASAP:ABE-0009220|UniProtKB/Swiss-Prot:P0AGF2|EcoGene:EG13083|GeneID:947274|						GCF_000005845.2_ASM584v2_genomic_29-OCT-2014 _iRT	>gi|16130718 GI:16130718|ASAP:ABE-0009220|UniProtKB/Swiss-Prot:P0AGF2|EcoGene:EG13083|GeneID:947274|
2	_QLIMLGK_	_QLIMLGK_	QLIMLGK	23.9429	16130718 GI:16130718	TRUE	_QLIMLGK_	401.746	H2O	3	b	1	337.223	57.969	FALSE	gi	16130718 GI:16130718	16130718 GI:16130718	ASAP:ABE-0009220|UniProtKB/Swiss-Prot:P0AGF2|EcoGene:EG13083|GeneID:947274|						GCF_000005845.2_ASM584v2_genomic_29-OCT-2014 _iRT	>gi|16130718 GI:16130718|ASAP:ABE-0009220|UniProtKB/Swiss-Prot:P0AGF2|EcoGene:EG13083|GeneID:947274|
2	_QLIMLGK_	_QLIMLGK_	QLIMLGK	23.9429	16130718 GI:16130718	TRUE	_QLIMLGK_	401.746	NH3	3	b	1	338.207	20.8774	FALSE	gi	16130718 GI:16130718	16130718 GI:16130718	ASAP:ABE-0009220|UniProtKB/Swiss-Prot:P0AGF2|EcoGene:EG13083|GeneID:947274|						GCF_000005845.2_ASM584v2_genomic_29-OCT-2014 _iRT	>gi|16130718 GI:16130718|ASAP:ABE-0009220|UniProtKB/Swiss-Prot:P0AGF2|EcoGene:EG13083|GeneID:947274|
2	_QLIMLGK_	_QLIMLGK_	QLIMLGK	23.9429	16130718 GI:16130718	TRUE	_QLIMLGK_	401.746	H2O	4	y	1	430.248	8.74609	TRUE	gi	16130718 GI:16130718	16130718 GI:16130718	ASAP:ABE-0009220|UniProtKB/Swiss-Prot:P0AGF2|EcoGene:EG13083|GeneID:947274|						GCF_000005845.2_ASM584v2_genomic_29-OCT-2014 _iRT	>gi|16130718 GI:16130718|ASAP:ABE-0009220|UniProtKB/Swiss-Prot:P0AGF2|EcoGene:EG13083|GeneID:947274|
2	_QLIMLGK_	_QLIMLGK_	QLIMLGK	23.9429	16130718 GI:16130718	TRUE	_QLIMLGK_	401.746	noloss	4	y	1	448.259	88.7915	FALSE	gi	16130718 GI:16130718	16130718 GI:16130718	ASAP:ABE-0009220|UniProtKB/Swiss-Prot:P0AGF2|EcoGene:EG13083|GeneID:947274|						GCF_000005845.2_ASM584v2_genomic_29-OCT-2014 _iRT	>gi|16130718 GI:16130718|ASAP:ABE-0009220|UniProtKB/Swiss-Prot:P0AGF2|EcoGene:EG13083|GeneID:947274|
2	_QLIMLGK_	_QLIMLGK_	QLIMLGK	23.9429	16130718 GI:16130718	TRUE	_QLIMLGK_	401.746	H2O	4	b	1	468.264	47.7261	FALSE	gi	16130718 GI:16130718	16130718 GI:16130718	ASAP:ABE-0009220|UniProtKB/Swiss-Prot:P0AGF2|EcoGene:EG13083|GeneID:947274|						GCF_000005845.2_ASM584v2_genomic_29-OCT-2014 _iRT	>gi|16130718 GI:16130718|ASAP:ABE-0009220|UniProtKB/Swiss-Prot:P0AGF2|EcoGene:EG13083|GeneID:947274|
2	_QLIMLGK_	_QLIMLGK_	QLIMLGK	23.9429	16130718 GI:16130718	TRUE	_QLIMLGK_	401.746	noloss	5	y	1	561.343	50.8875	FALSE	gi	16130718 GI:16130718	16130718 GI:16130718	ASAP:ABE-0009220|UniProtKB/Swiss-Prot:P0AGF2|EcoGene:EG13083|GeneID:947274|						GCF_000005845.2_ASM584v2_genomic_29-OCT-2014 _iRT	>gi|16130718 GI:16130718|ASAP:ABE-0009220|UniProtKB/Swiss-Prot:P0AGF2|EcoGene:EG13083|GeneID:947274|
2	_QLIMLGK_	_QLIMLGK_	QLIMLGK	23.9429	16130718 GI:16130718	TRUE	_QLIMLGK_	401.746	H2O	6	b	1	638.369	6.46876	TRUE	gi	16130718 GI:16130718	16130718 GI:16130718	ASAP:ABE-0009220|UniProtKB/Swiss-Prot:P0AGF2|EcoGene:EG13083|GeneID:947274|						GCF_000005845.2_ASM584v2_genomic_29-OCT-2014 _iRT	>gi|16130718 GI:16130718|ASAP:ABE-0009220|UniProtKB/Swiss-Prot:P0AGF2|EcoGene:EG13083|GeneID:947274|
2	_QLIMLGK_	_QLIMLGK_	QLIMLGK	23.9429	16130718 GI:16130718	TRUE	_QLIMLGK_	401.746	noloss	6	b	1	656.38	6.96566	TRUE	gi	16130718 GI:16130718	16130718 GI:16130718	ASAP:ABE-0009220|UniProtKB/Swiss-Prot:P0AGF2|EcoGene:EG13083|GeneID:947274|						GCF_000005845.2_ASM584v2_genomic_29-OCT-2014 _iRT	>gi|16130718 GI:16130718|ASAP:ABE-0009220|UniProtKB/Swiss-Prot:P0AGF2|EcoGene:EG13083|GeneID:947274|
2	_QLIMLGK_	_QLIMLGK_	QLIMLGK	23.9429	16130718 GI:16130718	TRUE	_QLIMLGK_	401.746	noloss	6	y	1	674.427	6.30365	TRUE	gi	16130718 GI:16130718	16130718 GI:16130718	ASAP:ABE-0009220|UniProtKB/Swiss-Prot:P0AGF2|EcoGene:EG13083|GeneID:947274|						GCF_000005845.2_ASM584v2_genomic_29-OCT-2014 _iRT	>gi|16130718 GI:16130718|ASAP:ABE-0009220|UniProtKB/Swiss-Prot:P0AGF2|EcoGene:EG13083|GeneID:947274|
3	_TWESYHLIR_	_TWESYHLIR_	TWESYHLIR	33.3697	16130497 GI:16130497	TRUE	_TWESYHLIR_	402.208	noloss	5	y	2	351.208	17.5552	TRUE	gi	16130497 GI:16130497	16130497 GI:16130497	ASAP:ABE-0008462|UniProtKB/Swiss-Prot:P0AFX7|EcoGene:EG12341|GeneID:947053|						GCF_000005845.2_ASM584v2_genomic_29-OCT-2014 _iRT	>gi|16130497 GI:16130497|ASAP:ABE-0008462|UniProtKB/Swiss-Prot:P0AFX7|EcoGene:EG12341|GeneID:947053|
3	_TWESYHLIR_	_TWESYHLIR_	TWESYHLIR	33.3697	16130497 GI:16130497	TRUE	_TWESYHLIR_	402.208	NH3	8	y	3	362.85	6.94648	TRUE	gi	16130497 GI:16130497	16130497 GI:16130497	ASAP:ABE-0008462|UniProtKB/Swiss-Prot:P0AFX7|EcoGene:EG12341|GeneID:947053|						GCF_000005845.2_ASM584v2_genomic_29-OCT-2014 _iRT	>gi|16130497 GI:16130497|ASAP:ABE-0008462|UniProtKB/Swiss-Prot:P0AFX7|EcoGene:EG12341|GeneID:947053|
3	_TWESYHLIR_	_TWESYHLIR_	TWESYHLIR	33.3697	16130497 GI:16130497	TRUE	_TWESYHLIR_	402.208	noloss	6	y	2	394.724	22.1482	TRUE	gi	16130497 GI:16130497	16130497 GI:16130497	ASAP:ABE-0008462|UniProtKB/Swiss-Prot:P0AFX7|EcoGene:EG12341|GeneID:947053|						GCF_000005845.2_ASM584v2_genomic_29-OCT-2014 _iRT	>gi|16130497 GI:16130497|ASAP:ABE-0008462|UniProtKB/Swiss-Prot:P0AFX7|EcoGene:EG12341|GeneID:947053|
3	_TWESYHLIR_	_TWESYHLIR_	TWESYHLIR	33.3697	16130497 GI:16130497	TRUE	_TWESYHLIR_	402.208	noloss	3	y	1	401.287	100	FALSE	gi	16130497 GI:16130497	16130497 GI:16130497	ASAP:ABE-0008462|UniProtKB/Swiss-Prot:P0AFX7|EcoGene:EG12341|GeneID:947053|						GCF_000005845.2_ASM584v2_genomic_29-OCT-2014 _iRT	>gi|16130497 GI:16130497|ASAP:ABE-0008462|UniProtKB/Swiss-Prot:P0AFX7|EcoGene:EG12341|GeneID:947053|
3	_TWESYHLIR_	_TWESYHLIR_	TWESYHLIR	33.3697	16130497 GI:16130497	TRUE	_TWESYHLIR_	402.208	H2O	7	y	2	450.24	49.2105	FALSE	gi	16130497 GI:16130497	16130497 GI:16130497	ASAP:ABE-0008462|UniProtKB/Swiss-Prot:P0AFX7|EcoGene:EG12341|GeneID:947053|						GCF_000005845.2_ASM584v2_genomic_29-OCT-2014 _iRT	>gi|16130497 GI:16130497|ASAP:ABE-0008462|UniProtKB/Swiss-Prot:P0AFX7|EcoGene:EG12341|GeneID:947053|
3	_TWESYHLIR_	_TWESYHLIR_	TWESYHLIR	33.3697	16130497 GI:16130497	TRUE	_TWESYHLIR_	402.208	NH3	7	y	2	450.732	27.5224	FALSE	gi	16130497 GI:16130497	16130497 GI:16130497	ASAP:ABE-0008462|UniProtKB/Swiss-Prot:P0AFX7|EcoGene:EG12341|GeneID:947053|						GCF_000005845.2_ASM584v2_genomic_29-OCT-2014 _iRT	>gi|16130497 GI:16130497|ASAP:ABE-0008462|UniProtKB/Swiss-Prot:P0AFX7|EcoGene:EG12341|GeneID:947053|
3	_TWESYHLIR_	_TWESYHLIR_	TWESYHLIR	33.3697	16130497 GI:16130497	TRUE	_TWESYHLIR_	402.208	noloss	7	y	2	459.246	12.9103	TRUE	gi	16130497 GI:16130497	16130497 GI:16130497	ASAP:ABE-0008462|UniProtKB/Swiss-Prot:P0AFX7|EcoGene:EG12341|GeneID:947053|						GCF_000005845.2_ASM584v2_genomic_29-OCT-2014 _iRT	>gi|16130497 GI:16130497|ASAP:ABE-0008462|UniProtKB/Swiss-Prot:P0AFX7|EcoGene:EG12341|GeneID:947053|
3	_TWESYHLIR_	_TWESYHLIR_	TWESYHLIR	33.3697	16130497 GI:16130497	TRUE	_TWESYHLIR_	402.208	NH3	4	y	1	521.319	5.53736	TRUE	gi	16130497 GI:16130497	16130497 GI:16130497	ASAP:ABE-0008462|UniProtKB/Swiss-Prot:P0AFX7|EcoGene:EG12341|GeneID:947053|						GCF_000005845.2_ASM584v2_genomic_29-OCT-2014 _iRT	>gi|16130497 GI:16130497|ASAP:ABE-0008462|UniProtKB/Swiss-Prot:P0AFX7|EcoGene:EG12341|GeneID:947053|
3	_TWESYHLIR_	_TWESYHLIR_	TWESYHLIR	33.3697	16130497 GI:16130497	TRUE	_TWESYHLIR_	402.208	noloss	4	y	1	538.346	68.971	FALSE	gi	16130497 GI:16130497	16130497 GI:16130497	ASAP:ABE-0008462|UniProtKB/Swiss-Prot:P0AFX7|EcoGene:EG12341|GeneID:947053|						GCF_000005845.2_ASM584v2_genomic_29-OCT-2014 _iRT	>gi|16130497 GI:16130497|ASAP:ABE-0008462|UniProtKB/Swiss-Prot:P0AFX7|EcoGene:EG12341|GeneID:947053|
3	_TWESYHLIR_	_TWESYHLIR_	TWESYHLIR	33.3697	16130497 GI:16130497	TRUE	_TWESYHLIR_	402.208	NH3	8	y	2	543.772	27.006	FALSE	gi	16130497 GI:16130497	16130497 GI:16130497	ASAP:ABE-0008462|UniProtKB/Swiss-Prot:P0AFX7|EcoGene:EG12341|GeneID:947053|						GCF_000005845.2_ASM584v2_genomic_29-OCT-2014 _iRT	>gi|16130497 GI:16130497|ASAP:ABE-0008462|UniProtKB/Swiss-Prot:P0AFX7|EcoGene:EG12341|GeneID:947053|
3	_TWESYHLIR_	_TWESYHLIR_	TWESYHLIR	33.3697	16130497 GI:16130497	TRUE	_TWESYHLIR_	402.208	noloss	5	y	1	701.409	24.6107	TRUE	gi	16130497 GI:16130497	16130497 GI:16130497	ASAP:ABE-0008462|UniProtKB/Swiss-Prot:P0AFX7|EcoGene:EG12341|GeneID:947053|						GCF_000005845.2_ASM584v2_genomic_29-OCT-2014 _iRT	>gi|16130497 GI:16130497|ASAP:ABE-0008462|UniProtKB/Swiss-Prot:P0AFX7|EcoGene:EG12341|GeneID:947053|
3	_TWESYHLIR_	_TWESYHLIR_	TWESYHLIR	33.3697	16130497 GI:16130497	TRUE	_TWESYHLIR_	402.208	noloss	6	y	1	788.441	42.1448	FALSE	gi	16130497 GI:16130497	16130497 GI:16130497	ASAP:ABE-0008462|UniProtKB/Swiss-Prot:P0AFX7|EcoGene:EG12341|GeneID:947053|						GCF_000005845.2_ASM584v2_genomic_29-OCT-2014 _iRT	>gi|16130497 GI:16130497|ASAP:ABE-0008462|UniProtKB/Swiss-Prot:P0AFX7|EcoGene:EG12341|GeneID:947053|
3	_TWESYHLIR_	_TWESYHLIR_	TWESYHLIR	33.3697	16130497 GI:16130497	TRUE	_TWESYHLIR_	402.208	noloss	7	y	1	917.484	24.2262	TRUE	gi	16130497 GI:16130497	16130497 GI:16130497	ASAP:ABE-0008462|UniProtKB/Swiss-Prot:P0AFX7|EcoGene:EG12341|GeneID:947053|						GCF_000005845.2_ASM584v2_genomic_29-OCT-2014 _iRT	>gi|16130497 GI:16130497|ASAP:ABE-0008462|UniProtKB/Swiss-Prot:P0AFX7|EcoGene:EG12341|GeneID:947053|
2	_VSVADVSK_	_VSVADVSK_	VSVADVSK	-15.3345	16129064 GI:16129064	TRUE	_VSVADVSK_	402.727	noloss	3	y	1	333.213	50.7842	FALSE	gi	16129064 GI:16129064	16129064 GI:16129064	ASAP:ABE-0003722|UniProtKB/Swiss-Prot:P69786|EcoGene:EG10787|GeneID:945651|						GCF_000005845.2_ASM584v2_genomic_29-OCT-2014 _iRT	>gi|16129064 GI:16129064|ASAP:ABE-0003722|UniProtKB/Swiss-Prot:P69786|EcoGene:EG10787|GeneID:945651|
2	_VSVADVSK_	_VSVADVSK_	VSVADVSK	-15.3345	16129064 GI:16129064	TRUE	_VSVADVSK_	402.727	noloss	4	b	1	357.213	12.8203	TRUE	gi	16129064 GI:16129064	16129064 GI:16129064	ASAP:ABE-0003722|UniProtKB/Swiss-Prot:P69786|EcoGene:EG10787|GeneID:945651|						GCF_000005845.2_ASM584v2_genomic_29-OCT-2014 _iRT	>gi|16129064 GI:16129064|ASAP:ABE-0003722|UniProtKB/Swiss-Prot:P69786|EcoGene:EG10787|GeneID:945651|
2	_VSVADVSK_	_VSVADVSK_	VSVADVSK	-15.3345	16129064 GI:16129064	TRUE	_VSVADVSK_	402.727	noloss	4	y	1	448.24	35.9766	FALSE	gi	16129064 GI:16129064	16129064 GI:16129064	ASAP:ABE-0003722|UniProtKB/Swiss-Prot:P69786|EcoGene:EG10787|GeneID:945651|						GCF_000005845.2_ASM584v2_genomic_29-OCT-2014 _iRT	>gi|16129064 GI:16129064|ASAP:ABE-0003722|UniProtKB/Swiss-Prot:P69786|EcoGene:EG10787|GeneID:945651|
2	_VSVADVSK_	_VSVADVSK_	VSVADVSK	-15.3345	16129064 GI:16129064	TRUE	_VSVADVSK_	402.727	H2O	5	b	1	454.23	10.6288	TRUE	gi	16129064 GI:16129064	16129064 GI:16129064	ASAP:ABE-0003722|UniProtKB/Swiss-Prot:P69786|EcoGene:EG10787|GeneID:945651|						GCF_000005845.2_ASM584v2_genomic_29-OCT-2014 _iRT	>gi|16129064 GI:16129064|ASAP:ABE-0003722|UniProtKB/Swiss-Prot:P69786|EcoGene:EG10787|GeneID:945651|
2	_VSVADVSK_	_VSVADVSK_	VSVADVSK	-15.3345	16129064 GI:16129064	TRUE	_VSVADVSK_	402.727	noloss	5	b	1	472.24	14.145	FALSE	gi	16129064 GI:16129064	16129064 GI:16129064	ASAP:ABE-0003722|UniProtKB/Swiss-Prot:P69786|EcoGene:EG10787|GeneID:945651|						GCF_000005845.2_ASM584v2_genomic_29-OCT-2014 _iRT	>gi|16129064 GI:16129064|ASAP:ABE-0003722|UniProtKB/Swiss-Prot:P69786|EcoGene:EG10787|GeneID:945651|
2	_VSVADVSK_	_VSVADVSK_	VSVADVSK	-15.3345	16129064 GI:16129064	TRUE	_VSVADVSK_	402.727	noloss	5	y	1	519.277	83.823	FALSE	gi	16129064 GI:16129064	16129064 GI:16129064	ASAP:ABE-0003722|UniProtKB/Swiss-Prot:P69786|EcoGene:EG10787|GeneID:945651|						GCF_000005845.2_ASM584v2_genomic_29-OCT-2014 _iRT	>gi|16129064 GI:16129064|ASAP:ABE-0003722|UniProtKB/Swiss-Prot:P69786|EcoGene:EG10787|GeneID:945651|
2	_VSVADVSK_	_VSVADVSK_	VSVADVSK	-15.3345	16129064 GI:16129064	TRUE	_VSVADVSK_	402.727	noloss	6	y	1	618.346	62.5514	FALSE	gi	16129064 GI:16129064	16129064 GI:16129064	ASAP:ABE-0003722|UniProtKB/Swiss-Prot:P69786|EcoGene:EG10787|GeneID:945651|						GCF_000005845.2_ASM584v2_genomic_29-OCT-2014 _iRT	>gi|16129064 GI:16129064|ASAP:ABE-0003722|UniProtKB/Swiss-Prot:P69786|EcoGene:EG10787|GeneID:945651|
2	_VSVADVSK_	_VSVADVSK_	VSVADVSK	-15.3345	16129064 GI:16129064	TRUE	_VSVADVSK_	402.727	H2O	7	y	1	687.367	8.71072	TRUE	gi	16129064 GI:16129064	16129064 GI:16129064	ASAP:ABE-0003722|UniProtKB/Swiss-Prot:P69786|EcoGene:EG10787|GeneID:945651|						GCF_000005845.2_ASM584v2_genomic_29-OCT-2014 _iRT	>gi|16129064 GI:16129064|ASAP:ABE-0003722|UniProtKB/Swiss-Prot:P69786|EcoGene:EG10787|GeneID:945651|
2	_VSVADVSK_	_VSVADVSK_	VSVADVSK	-15.3345	16129064 GI:16129064	TRUE	_VSVADVSK_	402.727	noloss	7	y	1	705.378	100	FALSE	gi	16129064 GI:16129064	16129064 GI:16129064	ASAP:ABE-0003722|UniProtKB/Swiss-Prot:P69786|EcoGene:EG10787|GeneID:945651|						GCF_000005845.2_ASM584v2_genomic_29-OCT-2014 _iRT	>gi|16129064 GI:16129064|ASAP:ABE-0003722|UniProtKB/Swiss-Prot:P69786|EcoGene:EG10787|GeneID:945651|
2	_NFLALAR_	_NFLALAR_	NFLALAR	35.6914	16128854 GI:16128854	TRUE	_NFLALAR_	402.74	NH3	3	y	1	342.214	6.9323	FALSE	gi	16128854 GI:16128854	16128854 GI:16128854	ASAP:ABE-0003015|UniProtKB/Swiss-Prot:P29018|EcoGene:EG11405|GeneID:949052|						GCF_000005845.2_ASM584v2_genomic_29-OCT-2014 _iRT	>gi|16128854 GI:16128854|ASAP:ABE-0003015|UniProtKB/Swiss-Prot:P29018|EcoGene:EG11405|GeneID:949052|
2	_NFLALAR_	_NFLALAR_	NFLALAR	35.6914	16128854 GI:16128854	TRUE	_NFLALAR_	402.74	noloss	3	y	1	359.24	22.5866	FALSE	gi	16128854 GI:16128854	16128854 GI:16128854	ASAP:ABE-0003015|UniProtKB/Swiss-Prot:P29018|EcoGene:EG11405|GeneID:949052|						GCF_000005845.2_ASM584v2_genomic_29-OCT-2014 _iRT	>gi|16128854 GI:16128854|ASAP:ABE-0003015|UniProtKB/Swiss-Prot:P29018|EcoGene:EG11405|GeneID:949052|
2	_NFLALAR_	_NFLALAR_	NFLALAR	35.6914	16128854 GI:16128854	TRUE	_NFLALAR_	402.74	noloss	3	b	1	375.203	9.15429	FALSE	gi	16128854 GI:16128854	16128854 GI:16128854	ASAP:ABE-0003015|UniProtKB/Swiss-Prot:P29018|EcoGene:EG11405|GeneID:949052|						GCF_000005845.2_ASM584v2_genomic_29-OCT-2014 _iRT	>gi|16128854 GI:16128854|ASAP:ABE-0003015|UniProtKB/Swiss-Prot:P29018|EcoGene:EG11405|GeneID:949052|
2	_NFLALAR_	_NFLALAR_	NFLALAR	35.6914	16128854 GI:16128854	TRUE	_NFLALAR_	402.74	noloss	4	y	1	430.277	92.2904	FALSE	gi	16128854 GI:16128854	16128854 GI:16128854	ASAP:ABE-0003015|UniProtKB/Swiss-Prot:P29018|EcoGene:EG11405|GeneID:949052|						GCF_000005845.2_ASM584v2_genomic_29-OCT-2014 _iRT	>gi|16128854 GI:16128854|ASAP:ABE-0003015|UniProtKB/Swiss-Prot:P29018|EcoGene:EG11405|GeneID:949052|
2	_NFLALAR_	_NFLALAR_	NFLALAR	35.6914	16128854 GI:16128854	TRUE	_NFLALAR_	402.74	noloss	5	y	1	543.361	100	FALSE	gi	16128854 GI:16128854	16128854 GI:16128854	ASAP:ABE-0003015|UniProtKB/Swiss-Prot:P29018|EcoGene:EG11405|GeneID:949052|						GCF_000005845.2_ASM584v2_genomic_29-OCT-2014 _iRT	>gi|16128854 GI:16128854|ASAP:ABE-0003015|UniProtKB/Swiss-Prot:P29018|EcoGene:EG11405|GeneID:949052|
2	_NFLALAR_	_NFLALAR_	NFLALAR	35.6914	16128854 GI:16128854	TRUE	_NFLALAR_	402.74	noloss	6	y	1	690.43	6.86812	FALSE	gi	16128854 GI:16128854	16128854 GI:16128854	ASAP:ABE-0003015|UniProtKB/Swiss-Prot:P29018|EcoGene:EG11405|GeneID:949052|						GCF_000005845.2_ASM584v2_genomic_29-OCT-2014 _iRT	>gi|16128854 GI:16128854|ASAP:ABE-0003015|UniProtKB/Swiss-Prot:P29018|EcoGene:EG11405|GeneID:949052|
2	_LDEASDR_	_LDEASDR_	LDEASDR	-47.1993	16129077 GI:16129077	TRUE	_LDEASDR_	403.188	H2O	3	y	1	359.167	7.79782	TRUE	gi	16129077 GI:16129077	16129077 GI:16129077	ASAP:ABE-0003763|UniProtKB/Swiss-Prot:P30958|EcoGene:EG11619|GeneID:945681|						GCF_000005845.2_ASM584v2_genomic_29-OCT-2014 _iRT	>gi|16129077 GI:16129077|ASAP:ABE-0003763|UniProtKB/Swiss-Prot:P30958|EcoGene:EG11619|GeneID:945681|
2	_LDEASDR_	_LDEASDR_	LDEASDR	-47.1993	16129077 GI:16129077	TRUE	_LDEASDR_	403.188	NH3	3	y	1	360.151	8.75834	TRUE	gi	16129077 GI:16129077	16129077 GI:16129077	ASAP:ABE-0003763|UniProtKB/Swiss-Prot:P30958|EcoGene:EG11619|GeneID:945681|						GCF_000005845.2_ASM584v2_genomic_29-OCT-2014 _iRT	>gi|16129077 GI:16129077|ASAP:ABE-0003763|UniProtKB/Swiss-Prot:P30958|EcoGene:EG11619|GeneID:945681|
2	_LDEASDR_	_LDEASDR_	LDEASDR	-47.1993	16129077 GI:16129077	TRUE	_LDEASDR_	403.188	noloss	3	y	1	377.178	22.7947	FALSE	gi	16129077 GI:16129077	16129077 GI:16129077	ASAP:ABE-0003763|UniProtKB/Swiss-Prot:P30958|EcoGene:EG11619|GeneID:945681|						GCF_000005845.2_ASM584v2_genomic_29-OCT-2014 _iRT	>gi|16129077 GI:16129077|ASAP:ABE-0003763|UniProtKB/Swiss-Prot:P30958|EcoGene:EG11619|GeneID:945681|
2	_LDEASDR_	_LDEASDR_	LDEASDR	-47.1993	16129077 GI:16129077	TRUE	_LDEASDR_	403.188	H2O	4	y	1	430.204	5.37048	TRUE	gi	16129077 GI:16129077	16129077 GI:16129077	ASAP:ABE-0003763|UniProtKB/Swiss-Prot:P30958|EcoGene:EG11619|GeneID:945681|						GCF_000005845.2_ASM584v2_genomic_29-OCT-2014 _iRT	>gi|16129077 GI:16129077|ASAP:ABE-0003763|UniProtKB/Swiss-Prot:P30958|EcoGene:EG11619|GeneID:945681|
2	_LDEASDR_	_LDEASDR_	LDEASDR	-47.1993	16129077 GI:16129077	TRUE	_LDEASDR_	403.188	noloss	4	y	1	448.215	60.9321	FALSE	gi	16129077 GI:16129077	16129077 GI:16129077	ASAP:ABE-0003763|UniProtKB/Swiss-Prot:P30958|EcoGene:EG11619|GeneID:945681|						GCF_000005845.2_ASM584v2_genomic_29-OCT-2014 _iRT	>gi|16129077 GI:16129077|ASAP:ABE-0003763|UniProtKB/Swiss-Prot:P30958|EcoGene:EG11619|GeneID:945681|
2	_LDEASDR_	_LDEASDR_	LDEASDR	-47.1993	16129077 GI:16129077	TRUE	_LDEASDR_	403.188	H2O	5	y	1	559.247	20.1635	FALSE	gi	16129077 GI:16129077	16129077 GI:16129077	ASAP:ABE-0003763|UniProtKB/Swiss-Prot:P30958|EcoGene:EG11619|GeneID:945681|						GCF_000005845.2_ASM584v2_genomic_29-OCT-2014 _iRT	>gi|16129077 GI:16129077|ASAP:ABE-0003763|UniProtKB/Swiss-Prot:P30958|EcoGene:EG11619|GeneID:945681|
2	_LDEASDR_	_LDEASDR_	LDEASDR	-47.1993	16129077 GI:16129077	TRUE	_LDEASDR_	403.188	NH3	5	y	1	560.231	11.3977	FALSE	gi	16129077 GI:16129077	16129077 GI:16129077	ASAP:ABE-0003763|UniProtKB/Swiss-Prot:P30958|EcoGene:EG11619|GeneID:945681|						GCF_000005845.2_ASM584v2_genomic_29-OCT-2014 _iRT	>gi|16129077 GI:16129077|ASAP:ABE-0003763|UniProtKB/Swiss-Prot:P30958|EcoGene:EG11619|GeneID:945681|
2	_LDEASDR_	_LDEASDR_	LDEASDR	-47.1993	16129077 GI:16129077	TRUE	_LDEASDR_	403.188	noloss	5	y	1	577.258	88.9052	FALSE	gi	16129077 GI:16129077	16129077 GI:16129077	ASAP:ABE-0003763|UniProtKB/Swiss-Prot:P30958|EcoGene:EG11619|GeneID:945681|						GCF_000005845.2_ASM584v2_genomic_29-OCT-2014 _iRT	>gi|16129077 GI:16129077|ASAP:ABE-0003763|UniProtKB/Swiss-Prot:P30958|EcoGene:EG11619|GeneID:945681|
2	_LDEASDR_	_LDEASDR_	LDEASDR	-47.1993	16129077 GI:16129077	TRUE	_LDEASDR_	403.188	H2O	6	y	1	674.274	11.0988	TRUE	gi	16129077 GI:16129077	16129077 GI:16129077	ASAP:ABE-0003763|UniProtKB/Swiss-Prot:P30958|EcoGene:EG11619|GeneID:945681|						GCF_000005845.2_ASM584v2_genomic_29-OCT-2014 _iRT	>gi|16129077 GI:16129077|ASAP:ABE-0003763|UniProtKB/Swiss-Prot:P30958|EcoGene:EG11619|GeneID:945681|
2	_LDEASDR_	_LDEASDR_	LDEASDR	-47.1993	16129077 GI:16129077	TRUE	_LDEASDR_	403.188	noloss	6	y	1	692.285	100	FALSE	gi	16129077 GI:16129077	16129077 GI:16129077	ASAP:ABE-0003763|UniProtKB/Swiss-Prot:P30958|EcoGene:EG11619|GeneID:945681|						GCF_000005845.2_ASM584v2_genomic_29-OCT-2014 _iRT	>gi|16129077 GI:16129077|ASAP:ABE-0003763|UniProtKB/Swiss-Prot:P30958|EcoGene:EG11619|GeneID:945681|
2	_LDEASDR_	_LDEASDR_	LDEASDR	-47.1993	16129077 GI:16129077	TRUE	_LDEASDR_	403.188	NH3	4	y	1	431.188	5.31542	TRUE	gi	16129077 GI:16129077	16129077 GI:16129077	ASAP:ABE-0003763|UniProtKB/Swiss-Prot:P30958|EcoGene:EG11619|GeneID:945681|						GCF_000005845.2_ASM584v2_genomic_29-OCT-2014 _iRT	>gi|16129077 GI:16129077|ASAP:ABE-0003763|UniProtKB/Swiss-Prot:P30958|EcoGene:EG11619|GeneID:945681|
2	_LDEASDR_	_LDEASDR_	LDEASDR	-47.1993	16129077 GI:16129077	TRUE	_LDEASDR_	403.188	H2O	5	b	1	498.219	7.16944	TRUE	gi	16129077 GI:16129077	16129077 GI:16129077	ASAP:ABE-0003763|UniProtKB/Swiss-Prot:P30958|EcoGene:EG11619|GeneID:945681|						GCF_000005845.2_ASM584v2_genomic_29-OCT-2014 _iRT	>gi|16129077 GI:16129077|ASAP:ABE-0003763|UniProtKB/Swiss-Prot:P30958|EcoGene:EG11619|GeneID:945681|
3	_HYFGINWDR_	_HYFGINWDR_	HYFGINWDR	42.4611	16128187 GI:16128187	TRUE	_HYFGINWDR_	403.193	NH3	5	b	2	301.142	100	FALSE	gi	16128187 GI:16128187	16128187 GI:16128187	ASAP:ABE-0000657|UniProtKB/Swiss-Prot:P16659|EcoGene:EG10770|GeneID:949116|						GCF_000005845.2_ASM584v2_genomic_29-OCT-2014 _iRT	>gi|16128187 GI:16128187|ASAP:ABE-0000657|UniProtKB/Swiss-Prot:P16659|EcoGene:EG10770|GeneID:949116|
3	_HYFGINWDR_	_HYFGINWDR_	HYFGINWDR	42.4611	16128187 GI:16128187	TRUE	_HYFGINWDR_	403.193	H2O	3	b	1	430.187	50.7101	FALSE	gi	16128187 GI:16128187	16128187 GI:16128187	ASAP:ABE-0000657|UniProtKB/Swiss-Prot:P16659|EcoGene:EG10770|GeneID:949116|						GCF_000005845.2_ASM584v2_genomic_29-OCT-2014 _iRT	>gi|16128187 GI:16128187|ASAP:ABE-0000657|UniProtKB/Swiss-Prot:P16659|EcoGene:EG10770|GeneID:949116|
3	_HYFGINWDR_	_HYFGINWDR_	HYFGINWDR	42.4611	16128187 GI:16128187	TRUE	_HYFGINWDR_	403.193	noloss	3	b	1	448.198	20.87	TRUE	gi	16128187 GI:16128187	16128187 GI:16128187	ASAP:ABE-0000657|UniProtKB/Swiss-Prot:P16659|EcoGene:EG10770|GeneID:949116|						GCF_000005845.2_ASM584v2_genomic_29-OCT-2014 _iRT	>gi|16128187 GI:16128187|ASAP:ABE-0000657|UniProtKB/Swiss-Prot:P16659|EcoGene:EG10770|GeneID:949116|
3	_HYFGINWDR_	_HYFGINWDR_	HYFGINWDR	42.4611	16128187 GI:16128187	TRUE	_HYFGINWDR_	403.193	NH3	3	y	1	459.199	8.1932	TRUE	gi	16128187 GI:16128187	16128187 GI:16128187	ASAP:ABE-0000657|UniProtKB/Swiss-Prot:P16659|EcoGene:EG10770|GeneID:949116|						GCF_000005845.2_ASM584v2_genomic_29-OCT-2014 _iRT	>gi|16128187 GI:16128187|ASAP:ABE-0000657|UniProtKB/Swiss-Prot:P16659|EcoGene:EG10770|GeneID:949116|
3	_HYFGINWDR_	_HYFGINWDR_	HYFGINWDR	42.4611	16128187 GI:16128187	TRUE	_HYFGINWDR_	403.193	noloss	3	y	1	476.225	68.2002	FALSE	gi	16128187 GI:16128187	16128187 GI:16128187	ASAP:ABE-0000657|UniProtKB/Swiss-Prot:P16659|EcoGene:EG10770|GeneID:949116|						GCF_000005845.2_ASM584v2_genomic_29-OCT-2014 _iRT	>gi|16128187 GI:16128187|ASAP:ABE-0000657|UniProtKB/Swiss-Prot:P16659|EcoGene:EG10770|GeneID:949116|
3	_HYFGINWDR_	_HYFGINWDR_	HYFGINWDR	42.4611	16128187 GI:16128187	TRUE	_HYFGINWDR_	403.193	H2O	4	b	1	487.209	6.59661	TRUE	gi	16128187 GI:16128187	16128187 GI:16128187	ASAP:ABE-0000657|UniProtKB/Swiss-Prot:P16659|EcoGene:EG10770|GeneID:949116|						GCF_000005845.2_ASM584v2_genomic_29-OCT-2014 _iRT	>gi|16128187 GI:16128187|ASAP:ABE-0000657|UniProtKB/Swiss-Prot:P16659|EcoGene:EG10770|GeneID:949116|
3	_HYFGINWDR_	_HYFGINWDR_	HYFGINWDR	42.4611	16128187 GI:16128187	TRUE	_HYFGINWDR_	403.193	noloss	4	b	1	505.219	94.0903	FALSE	gi	16128187 GI:16128187	16128187 GI:16128187	ASAP:ABE-0000657|UniProtKB/Swiss-Prot:P16659|EcoGene:EG10770|GeneID:949116|						GCF_000005845.2_ASM584v2_genomic_29-OCT-2014 _iRT	>gi|16128187 GI:16128187|ASAP:ABE-0000657|UniProtKB/Swiss-Prot:P16659|EcoGene:EG10770|GeneID:949116|
3	_HYFGINWDR_	_HYFGINWDR_	HYFGINWDR	42.4611	16128187 GI:16128187	TRUE	_HYFGINWDR_	403.193	NH3	4	y	1	573.242	78.8717	FALSE	gi	16128187 GI:16128187	16128187 GI:16128187	ASAP:ABE-0000657|UniProtKB/Swiss-Prot:P16659|EcoGene:EG10770|GeneID:949116|						GCF_000005845.2_ASM584v2_genomic_29-OCT-2014 _iRT	>gi|16128187 GI:16128187|ASAP:ABE-0000657|UniProtKB/Swiss-Prot:P16659|EcoGene:EG10770|GeneID:949116|
3	_HYFGINWDR_	_HYFGINWDR_	HYFGINWDR	42.4611	16128187 GI:16128187	TRUE	_HYFGINWDR_	403.193	noloss	4	y	1	590.268	85.6574	FALSE	gi	16128187 GI:16128187	16128187 GI:16128187	ASAP:ABE-0000657|UniProtKB/Swiss-Prot:P16659|EcoGene:EG10770|GeneID:949116|						GCF_000005845.2_ASM584v2_genomic_29-OCT-2014 _iRT	>gi|16128187 GI:16128187|ASAP:ABE-0000657|UniProtKB/Swiss-Prot:P16659|EcoGene:EG10770|GeneID:949116|
3	_HYFGINWDR_	_HYFGINWDR_	HYFGINWDR	42.4611	16128187 GI:16128187	TRUE	_HYFGINWDR_	403.193	noloss	5	b	1	618.303	11.4109	TRUE	gi	16128187 GI:16128187	16128187 GI:16128187	ASAP:ABE-0000657|UniProtKB/Swiss-Prot:P16659|EcoGene:EG10770|GeneID:949116|						GCF_000005845.2_ASM584v2_genomic_29-OCT-2014 _iRT	>gi|16128187 GI:16128187|ASAP:ABE-0000657|UniProtKB/Swiss-Prot:P16659|EcoGene:EG10770|GeneID:949116|
3	_MKVDEMVTVR_	_MKVDEMVTVR_	MKVDEMVTVR	18.149	16130091 GI:16130091	TRUE	_MKVDEMVTVR_	403.211	noloss	3	y	1	375.235	100	FALSE	gi	16130091 GI:16130091	16130091 GI:16130091	ASAP:ABE-0007117|UniProtKB/Swiss-Prot:P0A6T5|EcoGene:EG11375|GeneID:949040|						GCF_000005845.2_ASM584v2_genomic_29-OCT-2014 _iRT	>gi|16130091 GI:16130091|ASAP:ABE-0007117|UniProtKB/Swiss-Prot:P0A6T5|EcoGene:EG11375|GeneID:949040|
3	_MKVDEMVTVR_	_MKVDEMVTVR_	MKVDEMVTVR	18.149	16130091 GI:16130091	TRUE	_MKVDEMVTVR_	403.211	noloss	4	b	1	474.238	5.63699	FALSE	gi	16130091 GI:16130091	16130091 GI:16130091	ASAP:ABE-0007117|UniProtKB/Swiss-Prot:P0A6T5|EcoGene:EG11375|GeneID:949040|						GCF_000005845.2_ASM584v2_genomic_29-OCT-2014 _iRT	>gi|16130091 GI:16130091|ASAP:ABE-0007117|UniProtKB/Swiss-Prot:P0A6T5|EcoGene:EG11375|GeneID:949040|
3	_MKVDEMVTVR_	_MKVDEMVTVR_	MKVDEMVTVR	18.149	16130091 GI:16130091	TRUE	_MKVDEMVTVR_	403.211	noloss	4	y	1	474.303	55.7384	FALSE	gi	16130091 GI:16130091	16130091 GI:16130091	ASAP:ABE-0007117|UniProtKB/Swiss-Prot:P0A6T5|EcoGene:EG11375|GeneID:949040|						GCF_000005845.2_ASM584v2_genomic_29-OCT-2014 _iRT	>gi|16130091 GI:16130091|ASAP:ABE-0007117|UniProtKB/Swiss-Prot:P0A6T5|EcoGene:EG11375|GeneID:949040|
3	_MKVDEMVTVR_	_MKVDEMVTVR_	MKVDEMVTVR	18.149	16130091 GI:16130091	TRUE	_MKVDEMVTVR_	403.211	noloss	5	b	1	603.281	12.9154	FALSE	gi	16130091 GI:16130091	16130091 GI:16130091	ASAP:ABE-0007117|UniProtKB/Swiss-Prot:P0A6T5|EcoGene:EG11375|GeneID:949040|						GCF_000005845.2_ASM584v2_genomic_29-OCT-2014 _iRT	>gi|16130091 GI:16130091|ASAP:ABE-0007117|UniProtKB/Swiss-Prot:P0A6T5|EcoGene:EG11375|GeneID:949040|
3	_MKVDEMVTVR_	_MKVDEMVTVR_	MKVDEMVTVR	18.149	16130091 GI:16130091	TRUE	_MKVDEMVTVR_	403.211	noloss	5	y	1	605.344	6.43572	FALSE	gi	16130091 GI:16130091	16130091 GI:16130091	ASAP:ABE-0007117|UniProtKB/Swiss-Prot:P0A6T5|EcoGene:EG11375|GeneID:949040|						GCF_000005845.2_ASM584v2_genomic_29-OCT-2014 _iRT	>gi|16130091 GI:16130091|ASAP:ABE-0007117|UniProtKB/Swiss-Prot:P0A6T5|EcoGene:EG11375|GeneID:949040|
3	_MKVDEMVTVR_	_MKVDEMVTVR_	MKVDEMVTVR	18.149	16130091 GI:16130091	TRUE	_MKVDEMVTVR_	403.211	noloss	6	b	1	734.321	8.28337	FALSE	gi	16130091 GI:16130091	16130091 GI:16130091	ASAP:ABE-0007117|UniProtKB/Swiss-Prot:P0A6T5|EcoGene:EG11375|GeneID:949040|						GCF_000005845.2_ASM584v2_genomic_29-OCT-2014 _iRT	>gi|16130091 GI:16130091|ASAP:ABE-0007117|UniProtKB/Swiss-Prot:P0A6T5|EcoGene:EG11375|GeneID:949040|
2	_GEPLSFR_	_GEPLSFR_	GEPLSFR	9.83907	16131226 GI:16131226	TRUE	_GEPLSFR_	403.214	noloss	5	y	2	310.182	50.0886	FALSE	gi	16131226 GI:16131226	16131226 GI:16131226	ASAP:ABE-0010938|UniProtKB/Swiss-Prot:P45523|EcoGene:EG12900|GeneID:947850|						GCF_000005845.2_ASM584v2_genomic_29-OCT-2014 _iRT	>gi|16131226 GI:16131226|ASAP:ABE-0010938|UniProtKB/Swiss-Prot:P45523|EcoGene:EG12900|GeneID:947850|
2	_GEPLSFR_	_GEPLSFR_	GEPLSFR	9.83907	16131226 GI:16131226	TRUE	_GEPLSFR_	403.214	NH3	3	y	1	392.193	8.06455	FALSE	gi	16131226 GI:16131226	16131226 GI:16131226	ASAP:ABE-0010938|UniProtKB/Swiss-Prot:P45523|EcoGene:EG12900|GeneID:947850|						GCF_000005845.2_ASM584v2_genomic_29-OCT-2014 _iRT	>gi|16131226 GI:16131226|ASAP:ABE-0010938|UniProtKB/Swiss-Prot:P45523|EcoGene:EG12900|GeneID:947850|
2	_GEPLSFR_	_GEPLSFR_	GEPLSFR	9.83907	16131226 GI:16131226	TRUE	_GEPLSFR_	403.214	noloss	3	y	1	409.219	90.8443	FALSE	gi	16131226 GI:16131226	16131226 GI:16131226	ASAP:ABE-0010938|UniProtKB/Swiss-Prot:P45523|EcoGene:EG12900|GeneID:947850|						GCF_000005845.2_ASM584v2_genomic_29-OCT-2014 _iRT	>gi|16131226 GI:16131226|ASAP:ABE-0010938|UniProtKB/Swiss-Prot:P45523|EcoGene:EG12900|GeneID:947850|
2	_GEPLSFR_	_GEPLSFR_	GEPLSFR	9.83907	16131226 GI:16131226	TRUE	_GEPLSFR_	403.214	noloss	4	y	1	522.303	89.0538	FALSE	gi	16131226 GI:16131226	16131226 GI:16131226	ASAP:ABE-0010938|UniProtKB/Swiss-Prot:P45523|EcoGene:EG12900|GeneID:947850|						GCF_000005845.2_ASM584v2_genomic_29-OCT-2014 _iRT	>gi|16131226 GI:16131226|ASAP:ABE-0010938|UniProtKB/Swiss-Prot:P45523|EcoGene:EG12900|GeneID:947850|
2	_GEPLSFR_	_GEPLSFR_	GEPLSFR	9.83907	16131226 GI:16131226	TRUE	_GEPLSFR_	403.214	NH3	5	y	1	602.33	8.301	FALSE	gi	16131226 GI:16131226	16131226 GI:16131226	ASAP:ABE-0010938|UniProtKB/Swiss-Prot:P45523|EcoGene:EG12900|GeneID:947850|						GCF_000005845.2_ASM584v2_genomic_29-OCT-2014 _iRT	>gi|16131226 GI:16131226|ASAP:ABE-0010938|UniProtKB/Swiss-Prot:P45523|EcoGene:EG12900|GeneID:947850|
2	_GEPLSFR_	_GEPLSFR_	GEPLSFR	9.83907	16131226 GI:16131226	TRUE	_GEPLSFR_	403.214	noloss	5	y	1	619.356	100	FALSE	gi	16131226 GI:16131226	16131226 GI:16131226	ASAP:ABE-0010938|UniProtKB/Swiss-Prot:P45523|EcoGene:EG12900|GeneID:947850|						GCF_000005845.2_ASM584v2_genomic_29-OCT-2014 _iRT	>gi|16131226 GI:16131226|ASAP:ABE-0010938|UniProtKB/Swiss-Prot:P45523|EcoGene:EG12900|GeneID:947850|
2	_AAAEGEMK_	_AAAEGEMK_	AAAEGEMK	-50.8328	16129733 GI:16129733	TRUE	_AAAEGEMK_	403.689	H2O	7	y	2	359.165	7.78938	TRUE	gi	16129733 GI:16129733	16129733 GI:16129733	ASAP:ABE-0005920|UniProtKB/Swiss-Prot:P0A9B2|EcoGene:EG10367|GeneID:947679|						GCF_000005845.2_ASM584v2_genomic_29-OCT-2014 _iRT	>gi|16129733 GI:16129733|ASAP:ABE-0005920|UniProtKB/Swiss-Prot:P0A9B2|EcoGene:EG10367|GeneID:947679|
2	_AAAEGEMK_	_AAAEGEMK_	AAAEGEMK	-50.8328	16129733 GI:16129733	TRUE	_AAAEGEMK_	403.689	H2O	3	y	1	389.185	8.81372	FALSE	gi	16129733 GI:16129733	16129733 GI:16129733	ASAP:ABE-0005920|UniProtKB/Swiss-Prot:P0A9B2|EcoGene:EG10367|GeneID:947679|						GCF_000005845.2_ASM584v2_genomic_29-OCT-2014 _iRT	>gi|16129733 GI:16129733|ASAP:ABE-0005920|UniProtKB/Swiss-Prot:P0A9B2|EcoGene:EG10367|GeneID:947679|
2	_AAAEGEMK_	_AAAEGEMK_	AAAEGEMK	-50.8328	16129733 GI:16129733	TRUE	_AAAEGEMK_	403.689	noloss	3	y	1	407.196	5.48508	TRUE	gi	16129733 GI:16129733	16129733 GI:16129733	ASAP:ABE-0005920|UniProtKB/Swiss-Prot:P0A9B2|EcoGene:EG10367|GeneID:947679|						GCF_000005845.2_ASM584v2_genomic_29-OCT-2014 _iRT	>gi|16129733 GI:16129733|ASAP:ABE-0005920|UniProtKB/Swiss-Prot:P0A9B2|EcoGene:EG10367|GeneID:947679|
2	_AAAEGEMK_	_AAAEGEMK_	AAAEGEMK	-50.8328	16129733 GI:16129733	TRUE	_AAAEGEMK_	403.689	noloss	4	y	1	464.217	64.7134	FALSE	gi	16129733 GI:16129733	16129733 GI:16129733	ASAP:ABE-0005920|UniProtKB/Swiss-Prot:P0A9B2|EcoGene:EG10367|GeneID:947679|						GCF_000005845.2_ASM584v2_genomic_29-OCT-2014 _iRT	>gi|16129733 GI:16129733|ASAP:ABE-0005920|UniProtKB/Swiss-Prot:P0A9B2|EcoGene:EG10367|GeneID:947679|
2	_AAAEGEMK_	_AAAEGEMK_	AAAEGEMK	-50.8328	16129733 GI:16129733	TRUE	_AAAEGEMK_	403.689	H2O	5	y	1	575.249	19.6159	FALSE	gi	16129733 GI:16129733	16129733 GI:16129733	ASAP:ABE-0005920|UniProtKB/Swiss-Prot:P0A9B2|EcoGene:EG10367|GeneID:947679|						GCF_000005845.2_ASM584v2_genomic_29-OCT-2014 _iRT	>gi|16129733 GI:16129733|ASAP:ABE-0005920|UniProtKB/Swiss-Prot:P0A9B2|EcoGene:EG10367|GeneID:947679|
2	_AAAEGEMK_	_AAAEGEMK_	AAAEGEMK	-50.8328	16129733 GI:16129733	TRUE	_AAAEGEMK_	403.689	NH3	5	y	1	576.233	6.42917	TRUE	gi	16129733 GI:16129733	16129733 GI:16129733	ASAP:ABE-0005920|UniProtKB/Swiss-Prot:P0A9B2|EcoGene:EG10367|GeneID:947679|						GCF_000005845.2_ASM584v2_genomic_29-OCT-2014 _iRT	>gi|16129733 GI:16129733|ASAP:ABE-0005920|UniProtKB/Swiss-Prot:P0A9B2|EcoGene:EG10367|GeneID:947679|
2	_AAAEGEMK_	_AAAEGEMK_	AAAEGEMK	-50.8328	16129733 GI:16129733	TRUE	_AAAEGEMK_	403.689	noloss	5	y	1	593.26	47.3939	FALSE	gi	16129733 GI:16129733	16129733 GI:16129733	ASAP:ABE-0005920|UniProtKB/Swiss-Prot:P0A9B2|EcoGene:EG10367|GeneID:947679|						GCF_000005845.2_ASM584v2_genomic_29-OCT-2014 _iRT	>gi|16129733 GI:16129733|ASAP:ABE-0005920|UniProtKB/Swiss-Prot:P0A9B2|EcoGene:EG10367|GeneID:947679|
2	_AAAEGEMK_	_AAAEGEMK_	AAAEGEMK	-50.8328	16129733 GI:16129733	TRUE	_AAAEGEMK_	403.689	noloss	6	y	1	664.297	100	FALSE	gi	16129733 GI:16129733	16129733 GI:16129733	ASAP:ABE-0005920|UniProtKB/Swiss-Prot:P0A9B2|EcoGene:EG10367|GeneID:947679|						GCF_000005845.2_ASM584v2_genomic_29-OCT-2014 _iRT	>gi|16129733 GI:16129733|ASAP:ABE-0005920|UniProtKB/Swiss-Prot:P0A9B2|EcoGene:EG10367|GeneID:947679|
2	_AAAEGEMK_	_AAAEGEMK_	AAAEGEMK	-50.8328	16129733 GI:16129733	TRUE	_AAAEGEMK_	403.689	noloss	7	y	1	735.334	28.6202	FALSE	gi	16129733 GI:16129733	16129733 GI:16129733	ASAP:ABE-0005920|UniProtKB/Swiss-Prot:P0A9B2|EcoGene:EG10367|GeneID:947679|						GCF_000005845.2_ASM584v2_genomic_29-OCT-2014 _iRT	>gi|16129733 GI:16129733|ASAP:ABE-0005920|UniProtKB/Swiss-Prot:P0A9B2|EcoGene:EG10367|GeneID:947679|
4	_MVTFHTNHGDIVIK_	_MVTFHTNHGDIVIK_	MVTFHTNHGDIVIK	33.5686	16128509 GI:16128509	TRUE	_MVTFHTNHGDIVIK_	403.713	noloss	11	b	4	314.149	12.7904	TRUE	gi	16128509 GI:16128509	16128509 GI:16128509	ASAP:ABE-0001806|UniProtKB/Swiss-Prot:P23869|EcoGene:EG10758|GeneID:949038|						GCF_000005845.2_ASM584v2_genomic_29-OCT-2014 _iRT	>gi|16128509 GI:16128509|ASAP:ABE-0001806|UniProtKB/Swiss-Prot:P23869|EcoGene:EG10758|GeneID:949038|
4	_MVTFHTNHGDIVIK_	_MVTFHTNHGDIVIK_	MVTFHTNHGDIVIK	33.5686	16128509 GI:16128509	TRUE	_MVTFHTNHGDIVIK_	403.713	noloss	3	y	1	359.265	61.2683	FALSE	gi	16128509 GI:16128509	16128509 GI:16128509	ASAP:ABE-0001806|UniProtKB/Swiss-Prot:P23869|EcoGene:EG10758|GeneID:949038|						GCF_000005845.2_ASM584v2_genomic_29-OCT-2014 _iRT	>gi|16128509 GI:16128509|ASAP:ABE-0001806|UniProtKB/Swiss-Prot:P23869|EcoGene:EG10758|GeneID:949038|
4	_MVTFHTNHGDIVIK_	_MVTFHTNHGDIVIK_	MVTFHTNHGDIVIK	33.5686	16128509 GI:16128509	TRUE	_MVTFHTNHGDIVIK_	403.713	H2O	10	y	3	372.537	13.7075	TRUE	gi	16128509 GI:16128509	16128509 GI:16128509	ASAP:ABE-0001806|UniProtKB/Swiss-Prot:P23869|EcoGene:EG10758|GeneID:949038|						GCF_000005845.2_ASM584v2_genomic_29-OCT-2014 _iRT	>gi|16128509 GI:16128509|ASAP:ABE-0001806|UniProtKB/Swiss-Prot:P23869|EcoGene:EG10758|GeneID:949038|
4	_MVTFHTNHGDIVIK_	_MVTFHTNHGDIVIK_	MVTFHTNHGDIVIK	33.5686	16128509 GI:16128509	TRUE	_MVTFHTNHGDIVIK_	403.713	NH3	10	y	3	372.865	15.3254	TRUE	gi	16128509 GI:16128509	16128509 GI:16128509	ASAP:ABE-0001806|UniProtKB/Swiss-Prot:P23869|EcoGene:EG10758|GeneID:949038|						GCF_000005845.2_ASM584v2_genomic_29-OCT-2014 _iRT	>gi|16128509 GI:16128509|ASAP:ABE-0001806|UniProtKB/Swiss-Prot:P23869|EcoGene:EG10758|GeneID:949038|
4	_MVTFHTNHGDIVIK_	_MVTFHTNHGDIVIK_	MVTFHTNHGDIVIK	33.5686	16128509 GI:16128509	TRUE	_MVTFHTNHGDIVIK_	403.713	noloss	10	y	3	378.54	51.4669	TRUE	gi	16128509 GI:16128509	16128509 GI:16128509	ASAP:ABE-0001806|UniProtKB/Swiss-Prot:P23869|EcoGene:EG10758|GeneID:949038|						GCF_000005845.2_ASM584v2_genomic_29-OCT-2014 _iRT	>gi|16128509 GI:16128509|ASAP:ABE-0001806|UniProtKB/Swiss-Prot:P23869|EcoGene:EG10758|GeneID:949038|
4	_MVTFHTNHGDIVIK_	_MVTFHTNHGDIVIK_	MVTFHTNHGDIVIK	33.5686	16128509 GI:16128509	TRUE	_MVTFHTNHGDIVIK_	403.713	noloss	7	y	2	391.232	37.079	TRUE	gi	16128509 GI:16128509	16128509 GI:16128509	ASAP:ABE-0001806|UniProtKB/Swiss-Prot:P23869|EcoGene:EG10758|GeneID:949038|						GCF_000005845.2_ASM584v2_genomic_29-OCT-2014 _iRT	>gi|16128509 GI:16128509|ASAP:ABE-0001806|UniProtKB/Swiss-Prot:P23869|EcoGene:EG10758|GeneID:949038|
4	_MVTFHTNHGDIVIK_	_MVTFHTNHGDIVIK_	MVTFHTNHGDIVIK	33.5686	16128509 GI:16128509	TRUE	_MVTFHTNHGDIVIK_	403.713	noloss	7	b	2	416.195	16.9696	TRUE	gi	16128509 GI:16128509	16128509 GI:16128509	ASAP:ABE-0001806|UniProtKB/Swiss-Prot:P23869|EcoGene:EG10758|GeneID:949038|						GCF_000005845.2_ASM584v2_genomic_29-OCT-2014 _iRT	>gi|16128509 GI:16128509|ASAP:ABE-0001806|UniProtKB/Swiss-Prot:P23869|EcoGene:EG10758|GeneID:949038|
4	_MVTFHTNHGDIVIK_	_MVTFHTNHGDIVIK_	MVTFHTNHGDIVIK	33.5686	16128509 GI:16128509	TRUE	_MVTFHTNHGDIVIK_	403.713	H2O	11	y	3	421.56	14.2348	TRUE	gi	16128509 GI:16128509	16128509 GI:16128509	ASAP:ABE-0001806|UniProtKB/Swiss-Prot:P23869|EcoGene:EG10758|GeneID:949038|						GCF_000005845.2_ASM584v2_genomic_29-OCT-2014 _iRT	>gi|16128509 GI:16128509|ASAP:ABE-0001806|UniProtKB/Swiss-Prot:P23869|EcoGene:EG10758|GeneID:949038|
4	_MVTFHTNHGDIVIK_	_MVTFHTNHGDIVIK_	MVTFHTNHGDIVIK	33.5686	16128509 GI:16128509	TRUE	_MVTFHTNHGDIVIK_	403.713	NH3	11	y	3	421.888	15.8334	TRUE	gi	16128509 GI:16128509	16128509 GI:16128509	ASAP:ABE-0001806|UniProtKB/Swiss-Prot:P23869|EcoGene:EG10758|GeneID:949038|						GCF_000005845.2_ASM584v2_genomic_29-OCT-2014 _iRT	>gi|16128509 GI:16128509|ASAP:ABE-0001806|UniProtKB/Swiss-Prot:P23869|EcoGene:EG10758|GeneID:949038|
4	_MVTFHTNHGDIVIK_	_MVTFHTNHGDIVIK_	MVTFHTNHGDIVIK	33.5686	16128509 GI:16128509	TRUE	_MVTFHTNHGDIVIK_	403.713	noloss	11	y	3	427.563	17.7043	TRUE	gi	16128509 GI:16128509	16128509 GI:16128509	ASAP:ABE-0001806|UniProtKB/Swiss-Prot:P23869|EcoGene:EG10758|GeneID:949038|						GCF_000005845.2_ASM584v2_genomic_29-OCT-2014 _iRT	>gi|16128509 GI:16128509|ASAP:ABE-0001806|UniProtKB/Swiss-Prot:P23869|EcoGene:EG10758|GeneID:949038|
4	_MVTFHTNHGDIVIK_	_MVTFHTNHGDIVIK_	MVTFHTNHGDIVIK	33.5686	16128509 GI:16128509	TRUE	_MVTFHTNHGDIVIK_	403.713	H2O	12	y	3	455.242	16.8311	TRUE	gi	16128509 GI:16128509	16128509 GI:16128509	ASAP:ABE-0001806|UniProtKB/Swiss-Prot:P23869|EcoGene:EG10758|GeneID:949038|						GCF_000005845.2_ASM584v2_genomic_29-OCT-2014 _iRT	>gi|16128509 GI:16128509|ASAP:ABE-0001806|UniProtKB/Swiss-Prot:P23869|EcoGene:EG10758|GeneID:949038|
4	_MVTFHTNHGDIVIK_	_MVTFHTNHGDIVIK_	MVTFHTNHGDIVIK	33.5686	16128509 GI:16128509	TRUE	_MVTFHTNHGDIVIK_	403.713	NH3	12	y	3	455.57	26.5374	TRUE	gi	16128509 GI:16128509	16128509 GI:16128509	ASAP:ABE-0001806|UniProtKB/Swiss-Prot:P23869|EcoGene:EG10758|GeneID:949038|						GCF_000005845.2_ASM584v2_genomic_29-OCT-2014 _iRT	>gi|16128509 GI:16128509|ASAP:ABE-0001806|UniProtKB/Swiss-Prot:P23869|EcoGene:EG10758|GeneID:949038|
4	_MVTFHTNHGDIVIK_	_MVTFHTNHGDIVIK_	MVTFHTNHGDIVIK	33.5686	16128509 GI:16128509	TRUE	_MVTFHTNHGDIVIK_	403.713	noloss	12	y	3	461.246	25.3738	TRUE	gi	16128509 GI:16128509	16128509 GI:16128509	ASAP:ABE-0001806|UniProtKB/Swiss-Prot:P23869|EcoGene:EG10758|GeneID:949038|						GCF_000005845.2_ASM584v2_genomic_29-OCT-2014 _iRT	>gi|16128509 GI:16128509|ASAP:ABE-0001806|UniProtKB/Swiss-Prot:P23869|EcoGene:EG10758|GeneID:949038|
4	_MVTFHTNHGDIVIK_	_MVTFHTNHGDIVIK_	MVTFHTNHGDIVIK	33.5686	16128509 GI:16128509	TRUE	_MVTFHTNHGDIVIK_	403.713	NH3	4	b	1	462.206	33.2809	TRUE	gi	16128509 GI:16128509	16128509 GI:16128509	ASAP:ABE-0001806|UniProtKB/Swiss-Prot:P23869|EcoGene:EG10758|GeneID:949038|						GCF_000005845.2_ASM584v2_genomic_29-OCT-2014 _iRT	>gi|16128509 GI:16128509|ASAP:ABE-0001806|UniProtKB/Swiss-Prot:P23869|EcoGene:EG10758|GeneID:949038|
4	_MVTFHTNHGDIVIK_	_MVTFHTNHGDIVIK_	MVTFHTNHGDIVIK	33.5686	16128509 GI:16128509	TRUE	_MVTFHTNHGDIVIK_	403.713	noloss	4	y	1	472.349	63.5541	FALSE	gi	16128509 GI:16128509	16128509 GI:16128509	ASAP:ABE-0001806|UniProtKB/Swiss-Prot:P23869|EcoGene:EG10758|GeneID:949038|						GCF_000005845.2_ASM584v2_genomic_29-OCT-2014 _iRT	>gi|16128509 GI:16128509|ASAP:ABE-0001806|UniProtKB/Swiss-Prot:P23869|EcoGene:EG10758|GeneID:949038|
4	_MVTFHTNHGDIVIK_	_MVTFHTNHGDIVIK_	MVTFHTNHGDIVIK	33.5686	16128509 GI:16128509	TRUE	_MVTFHTNHGDIVIK_	403.713	noloss	13	b	3	489.247	28.8234	TRUE	gi	16128509 GI:16128509	16128509 GI:16128509	ASAP:ABE-0001806|UniProtKB/Swiss-Prot:P23869|EcoGene:EG10758|GeneID:949038|						GCF_000005845.2_ASM584v2_genomic_29-OCT-2014 _iRT	>gi|16128509 GI:16128509|ASAP:ABE-0001806|UniProtKB/Swiss-Prot:P23869|EcoGene:EG10758|GeneID:949038|
4	_MVTFHTNHGDIVIK_	_MVTFHTNHGDIVIK_	MVTFHTNHGDIVIK	33.5686	16128509 GI:16128509	TRUE	_MVTFHTNHGDIVIK_	403.713	NH3	9	y	2	490.264	15.5888	TRUE	gi	16128509 GI:16128509	16128509 GI:16128509	ASAP:ABE-0001806|UniProtKB/Swiss-Prot:P23869|EcoGene:EG10758|GeneID:949038|						GCF_000005845.2_ASM584v2_genomic_29-OCT-2014 _iRT	>gi|16128509 GI:16128509|ASAP:ABE-0001806|UniProtKB/Swiss-Prot:P23869|EcoGene:EG10758|GeneID:949038|
4	_MVTFHTNHGDIVIK_	_MVTFHTNHGDIVIK_	MVTFHTNHGDIVIK	33.5686	16128509 GI:16128509	TRUE	_MVTFHTNHGDIVIK_	403.713	H2O	9	b	2	504.229	19.6799	TRUE	gi	16128509 GI:16128509	16128509 GI:16128509	ASAP:ABE-0001806|UniProtKB/Swiss-Prot:P23869|EcoGene:EG10758|GeneID:949038|						GCF_000005845.2_ASM584v2_genomic_29-OCT-2014 _iRT	>gi|16128509 GI:16128509|ASAP:ABE-0001806|UniProtKB/Swiss-Prot:P23869|EcoGene:EG10758|GeneID:949038|
4	_MVTFHTNHGDIVIK_	_MVTFHTNHGDIVIK_	MVTFHTNHGDIVIK	33.5686	16128509 GI:16128509	TRUE	_MVTFHTNHGDIVIK_	403.713	noloss	9	b	2	513.235	26.8497	TRUE	gi	16128509 GI:16128509	16128509 GI:16128509	ASAP:ABE-0001806|UniProtKB/Swiss-Prot:P23869|EcoGene:EG10758|GeneID:949038|						GCF_000005845.2_ASM584v2_genomic_29-OCT-2014 _iRT	>gi|16128509 GI:16128509|ASAP:ABE-0001806|UniProtKB/Swiss-Prot:P23869|EcoGene:EG10758|GeneID:949038|
4	_MVTFHTNHGDIVIK_	_MVTFHTNHGDIVIK_	MVTFHTNHGDIVIK	33.5686	16128509 GI:16128509	TRUE	_MVTFHTNHGDIVIK_	403.713	H2O	10	y	2	558.301	48.234	TRUE	gi	16128509 GI:16128509	16128509 GI:16128509	ASAP:ABE-0001806|UniProtKB/Swiss-Prot:P23869|EcoGene:EG10758|GeneID:949038|						GCF_000005845.2_ASM584v2_genomic_29-OCT-2014 _iRT	>gi|16128509 GI:16128509|ASAP:ABE-0001806|UniProtKB/Swiss-Prot:P23869|EcoGene:EG10758|GeneID:949038|
4	_MVTFHTNHGDIVIK_	_MVTFHTNHGDIVIK_	MVTFHTNHGDIVIK	33.5686	16128509 GI:16128509	TRUE	_MVTFHTNHGDIVIK_	403.713	NH3	10	y	2	558.793	45.2307	TRUE	gi	16128509 GI:16128509	16128509 GI:16128509	ASAP:ABE-0001806|UniProtKB/Swiss-Prot:P23869|EcoGene:EG10758|GeneID:949038|						GCF_000005845.2_ASM584v2_genomic_29-OCT-2014 _iRT	>gi|16128509 GI:16128509|ASAP:ABE-0001806|UniProtKB/Swiss-Prot:P23869|EcoGene:EG10758|GeneID:949038|
4	_MVTFHTNHGDIVIK_	_MVTFHTNHGDIVIK_	MVTFHTNHGDIVIK	33.5686	16128509 GI:16128509	TRUE	_MVTFHTNHGDIVIK_	403.713	noloss	10	y	2	567.307	100	FALSE	gi	16128509 GI:16128509	16128509 GI:16128509	ASAP:ABE-0001806|UniProtKB/Swiss-Prot:P23869|EcoGene:EG10758|GeneID:949038|						GCF_000005845.2_ASM584v2_genomic_29-OCT-2014 _iRT	>gi|16128509 GI:16128509|ASAP:ABE-0001806|UniProtKB/Swiss-Prot:P23869|EcoGene:EG10758|GeneID:949038|
4	_MVTFHTNHGDIVIK_	_MVTFHTNHGDIVIK_	MVTFHTNHGDIVIK	33.5686	16128509 GI:16128509	TRUE	_MVTFHTNHGDIVIK_	403.713	noloss	10	b	2	570.748	66.0165	FALSE	gi	16128509 GI:16128509	16128509 GI:16128509	ASAP:ABE-0001806|UniProtKB/Swiss-Prot:P23869|EcoGene:EG10758|GeneID:949038|						GCF_000005845.2_ASM584v2_genomic_29-OCT-2014 _iRT	>gi|16128509 GI:16128509|ASAP:ABE-0001806|UniProtKB/Swiss-Prot:P23869|EcoGene:EG10758|GeneID:949038|
4	_MVTFHTNHGDIVIK_	_MVTFHTNHGDIVIK_	MVTFHTNHGDIVIK	33.5686	16128509 GI:16128509	TRUE	_MVTFHTNHGDIVIK_	403.713	noloss	5	y	1	587.376	21.2583	TRUE	gi	16128509 GI:16128509	16128509 GI:16128509	ASAP:ABE-0001806|UniProtKB/Swiss-Prot:P23869|EcoGene:EG10758|GeneID:949038|						GCF_000005845.2_ASM584v2_genomic_29-OCT-2014 _iRT	>gi|16128509 GI:16128509|ASAP:ABE-0001806|UniProtKB/Swiss-Prot:P23869|EcoGene:EG10758|GeneID:949038|
4	_MVTFHTNHGDIVIK_	_MVTFHTNHGDIVIK_	MVTFHTNHGDIVIK	33.5686	16128509 GI:16128509	TRUE	_MVTFHTNHGDIVIK_	403.713	H2O	6	y	1	626.387	54.2476	TRUE	gi	16128509 GI:16128509	16128509 GI:16128509	ASAP:ABE-0001806|UniProtKB/Swiss-Prot:P23869|EcoGene:EG10758|GeneID:949038|						GCF_000005845.2_ASM584v2_genomic_29-OCT-2014 _iRT	>gi|16128509 GI:16128509|ASAP:ABE-0001806|UniProtKB/Swiss-Prot:P23869|EcoGene:EG10758|GeneID:949038|
4	_MVTFHTNHGDIVIK_	_MVTFHTNHGDIVIK_	MVTFHTNHGDIVIK	33.5686	16128509 GI:16128509	TRUE	_MVTFHTNHGDIVIK_	403.713	H2O	11	y	2	631.836	23.9725	TRUE	gi	16128509 GI:16128509	16128509 GI:16128509	ASAP:ABE-0001806|UniProtKB/Swiss-Prot:P23869|EcoGene:EG10758|GeneID:949038|						GCF_000005845.2_ASM584v2_genomic_29-OCT-2014 _iRT	>gi|16128509 GI:16128509|ASAP:ABE-0001806|UniProtKB/Swiss-Prot:P23869|EcoGene:EG10758|GeneID:949038|
4	_MVTFHTNHGDIVIK_	_MVTFHTNHGDIVIK_	MVTFHTNHGDIVIK	33.5686	16128509 GI:16128509	TRUE	_MVTFHTNHGDIVIK_	403.713	NH3	11	y	2	632.328	29.275	TRUE	gi	16128509 GI:16128509	16128509 GI:16128509	ASAP:ABE-0001806|UniProtKB/Swiss-Prot:P23869|EcoGene:EG10758|GeneID:949038|						GCF_000005845.2_ASM584v2_genomic_29-OCT-2014 _iRT	>gi|16128509 GI:16128509|ASAP:ABE-0001806|UniProtKB/Swiss-Prot:P23869|EcoGene:EG10758|GeneID:949038|
4	_MVTFHTNHGDIVIK_	_MVTFHTNHGDIVIK_	MVTFHTNHGDIVIK	33.5686	16128509 GI:16128509	TRUE	_MVTFHTNHGDIVIK_	403.713	noloss	11	y	2	640.841	22.5648	TRUE	gi	16128509 GI:16128509	16128509 GI:16128509	ASAP:ABE-0001806|UniProtKB/Swiss-Prot:P23869|EcoGene:EG10758|GeneID:949038|						GCF_000005845.2_ASM584v2_genomic_29-OCT-2014 _iRT	>gi|16128509 GI:16128509|ASAP:ABE-0001806|UniProtKB/Swiss-Prot:P23869|EcoGene:EG10758|GeneID:949038|
4	_MVTFHTNHGDIVIK_	_MVTFHTNHGDIVIK_	MVTFHTNHGDIVIK	33.5686	16128509 GI:16128509	TRUE	_MVTFHTNHGDIVIK_	403.713	noloss	6	y	1	644.398	85.5943	FALSE	gi	16128509 GI:16128509	16128509 GI:16128509	ASAP:ABE-0001806|UniProtKB/Swiss-Prot:P23869|EcoGene:EG10758|GeneID:949038|						GCF_000005845.2_ASM584v2_genomic_29-OCT-2014 _iRT	>gi|16128509 GI:16128509|ASAP:ABE-0001806|UniProtKB/Swiss-Prot:P23869|EcoGene:EG10758|GeneID:949038|
4	_MVTFHTNHGDIVIK_	_MVTFHTNHGDIVIK_	MVTFHTNHGDIVIK	33.5686	16128509 GI:16128509	TRUE	_MVTFHTNHGDIVIK_	403.713	H2O	12	y	2	682.359	34.3152	TRUE	gi	16128509 GI:16128509	16128509 GI:16128509	ASAP:ABE-0001806|UniProtKB/Swiss-Prot:P23869|EcoGene:EG10758|GeneID:949038|						GCF_000005845.2_ASM584v2_genomic_29-OCT-2014 _iRT	>gi|16128509 GI:16128509|ASAP:ABE-0001806|UniProtKB/Swiss-Prot:P23869|EcoGene:EG10758|GeneID:949038|
4	_MVTFHTNHGDIVIK_	_MVTFHTNHGDIVIK_	MVTFHTNHGDIVIK	33.5686	16128509 GI:16128509	TRUE	_MVTFHTNHGDIVIK_	403.713	NH3	12	y	2	682.852	21.3712	TRUE	gi	16128509 GI:16128509	16128509 GI:16128509	ASAP:ABE-0001806|UniProtKB/Swiss-Prot:P23869|EcoGene:EG10758|GeneID:949038|						GCF_000005845.2_ASM584v2_genomic_29-OCT-2014 _iRT	>gi|16128509 GI:16128509|ASAP:ABE-0001806|UniProtKB/Swiss-Prot:P23869|EcoGene:EG10758|GeneID:949038|
4	_MVTFHTNHGDIVIK_	_MVTFHTNHGDIVIK_	MVTFHTNHGDIVIK	33.5686	16128509 GI:16128509	TRUE	_MVTFHTNHGDIVIK_	403.713	noloss	12	y	2	691.365	34.8058	TRUE	gi	16128509 GI:16128509	16128509 GI:16128509	ASAP:ABE-0001806|UniProtKB/Swiss-Prot:P23869|EcoGene:EG10758|GeneID:949038|						GCF_000005845.2_ASM584v2_genomic_29-OCT-2014 _iRT	>gi|16128509 GI:16128509|ASAP:ABE-0001806|UniProtKB/Swiss-Prot:P23869|EcoGene:EG10758|GeneID:949038|
4	_MVTFHTNHGDIVIK_	_MVTFHTNHGDIVIK_	MVTFHTNHGDIVIK	33.5686	16128509 GI:16128509	TRUE	_MVTFHTNHGDIVIK_	403.713	noloss	7	y	1	781.457	33.1394	TRUE	gi	16128509 GI:16128509	16128509 GI:16128509	ASAP:ABE-0001806|UniProtKB/Swiss-Prot:P23869|EcoGene:EG10758|GeneID:949038|						GCF_000005845.2_ASM584v2_genomic_29-OCT-2014 _iRT	>gi|16128509 GI:16128509|ASAP:ABE-0001806|UniProtKB/Swiss-Prot:P23869|EcoGene:EG10758|GeneID:949038|
4	_MVTFHTNHGDIVIK_	_MVTFHTNHGDIVIK_	MVTFHTNHGDIVIK	33.5686	16128509 GI:16128509	TRUE	_MVTFHTNHGDIVIK_	403.713	noloss	8	y	1	895.5	31.0298	TRUE	gi	16128509 GI:16128509	16128509 GI:16128509	ASAP:ABE-0001806|UniProtKB/Swiss-Prot:P23869|EcoGene:EG10758|GeneID:949038|						GCF_000005845.2_ASM584v2_genomic_29-OCT-2014 _iRT	>gi|16128509 GI:16128509|ASAP:ABE-0001806|UniProtKB/Swiss-Prot:P23869|EcoGene:EG10758|GeneID:949038|
4	_MVTFHTNHGDIVIK_	_MVTFHTNHGDIVIK_	MVTFHTNHGDIVIK	33.5686	16128509 GI:16128509	TRUE	_MVTFHTNHGDIVIK_	403.713	H2O	9	y	1	978.537	14.4028	TRUE	gi	16128509 GI:16128509	16128509 GI:16128509	ASAP:ABE-0001806|UniProtKB/Swiss-Prot:P23869|EcoGene:EG10758|GeneID:949038|						GCF_000005845.2_ASM584v2_genomic_29-OCT-2014 _iRT	>gi|16128509 GI:16128509|ASAP:ABE-0001806|UniProtKB/Swiss-Prot:P23869|EcoGene:EG10758|GeneID:949038|
4	_MVTFHTNHGDIVIK_	_MVTFHTNHGDIVIK_	MVTFHTNHGDIVIK	33.5686	16128509 GI:16128509	TRUE	_MVTFHTNHGDIVIK_	403.713	NH3	9	y	1	979.521	14.2419	TRUE	gi	16128509 GI:16128509	16128509 GI:16128509	ASAP:ABE-0001806|UniProtKB/Swiss-Prot:P23869|EcoGene:EG10758|GeneID:949038|						GCF_000005845.2_ASM584v2_genomic_29-OCT-2014 _iRT	>gi|16128509 GI:16128509|ASAP:ABE-0001806|UniProtKB/Swiss-Prot:P23869|EcoGene:EG10758|GeneID:949038|
4	_MVTFHTNHGDIVIK_	_MVTFHTNHGDIVIK_	MVTFHTNHGDIVIK	33.5686	16128509 GI:16128509	TRUE	_MVTFHTNHGDIVIK_	403.713	noloss	9	y	1	996.547	56.5755	TRUE	gi	16128509 GI:16128509	16128509 GI:16128509	ASAP:ABE-0001806|UniProtKB/Swiss-Prot:P23869|EcoGene:EG10758|GeneID:949038|						GCF_000005845.2_ASM584v2_genomic_29-OCT-2014 _iRT	>gi|16128509 GI:16128509|ASAP:ABE-0001806|UniProtKB/Swiss-Prot:P23869|EcoGene:EG10758|GeneID:949038|
4	_MVTFHTNHGDIVIK_	_MVTFHTNHGDIVIK_	MVTFHTNHGDIVIK	33.5686	16128509 GI:16128509	TRUE	_MVTFHTNHGDIVIK_	403.713	noloss	9	b	1	1025.46	25.4432	TRUE	gi	16128509 GI:16128509	16128509 GI:16128509	ASAP:ABE-0001806|UniProtKB/Swiss-Prot:P23869|EcoGene:EG10758|GeneID:949038|						GCF_000005845.2_ASM584v2_genomic_29-OCT-2014 _iRT	>gi|16128509 GI:16128509|ASAP:ABE-0001806|UniProtKB/Swiss-Prot:P23869|EcoGene:EG10758|GeneID:949038|
4	_MVTFHTNHGDIVIK_	_MVTFHTNHGDIVIK_	MVTFHTNHGDIVIK	33.5686	16128509 GI:16128509	TRUE	_MVTFHTNHGDIVIK_	403.713	H2O	10	b	1	1122.48	72.547	FALSE	gi	16128509 GI:16128509	16128509 GI:16128509	ASAP:ABE-0001806|UniProtKB/Swiss-Prot:P23869|EcoGene:EG10758|GeneID:949038|						GCF_000005845.2_ASM584v2_genomic_29-OCT-2014 _iRT	>gi|16128509 GI:16128509|ASAP:ABE-0001806|UniProtKB/Swiss-Prot:P23869|EcoGene:EG10758|GeneID:949038|
4	_MVTFHTNHGDIVIK_	_MVTFHTNHGDIVIK_	MVTFHTNHGDIVIK	33.5686	16128509 GI:16128509	TRUE	_MVTFHTNHGDIVIK_	403.713	noloss	10	y	1	1133.61	19.9136	TRUE	gi	16128509 GI:16128509	16128509 GI:16128509	ASAP:ABE-0001806|UniProtKB/Swiss-Prot:P23869|EcoGene:EG10758|GeneID:949038|						GCF_000005845.2_ASM584v2_genomic_29-OCT-2014 _iRT	>gi|16128509 GI:16128509|ASAP:ABE-0001806|UniProtKB/Swiss-Prot:P23869|EcoGene:EG10758|GeneID:949038|
4	_MVTFHTNHGDIVIK_	_MVTFHTNHGDIVIK_	MVTFHTNHGDIVIK	33.5686	16128509 GI:16128509	TRUE	_MVTFHTNHGDIVIK_	403.713	noloss	10	b	1	1140.49	12.5344	TRUE	gi	16128509 GI:16128509	16128509 GI:16128509	ASAP:ABE-0001806|UniProtKB/Swiss-Prot:P23869|EcoGene:EG10758|GeneID:949038|						GCF_000005845.2_ASM584v2_genomic_29-OCT-2014 _iRT	>gi|16128509 GI:16128509|ASAP:ABE-0001806|UniProtKB/Swiss-Prot:P23869|EcoGene:EG10758|GeneID:949038|
4	_MVTFHTNHGDIVIK_	_MVTFHTNHGDIVIK_	MVTFHTNHGDIVIK	33.5686	16128509 GI:16128509	TRUE	_MVTFHTNHGDIVIK_	403.713	noloss	13	y	3	494.268	11.3136	TRUE	gi	16128509 GI:16128509	16128509 GI:16128509	ASAP:ABE-0001806|UniProtKB/Swiss-Prot:P23869|EcoGene:EG10758|GeneID:949038|						GCF_000005845.2_ASM584v2_genomic_29-OCT-2014 _iRT	>gi|16128509 GI:16128509|ASAP:ABE-0001806|UniProtKB/Swiss-Prot:P23869|EcoGene:EG10758|GeneID:949038|
4	_MVTFHTNHGDIVIK_	_MVTFHTNHGDIVIK_	MVTFHTNHGDIVIK	33.5686	16128509 GI:16128509	TRUE	_MVTFHTNHGDIVIK_	403.713	noloss	9	y	2	498.777	19.1134	TRUE	gi	16128509 GI:16128509	16128509 GI:16128509	ASAP:ABE-0001806|UniProtKB/Swiss-Prot:P23869|EcoGene:EG10758|GeneID:949038|						GCF_000005845.2_ASM584v2_genomic_29-OCT-2014 _iRT	>gi|16128509 GI:16128509|ASAP:ABE-0001806|UniProtKB/Swiss-Prot:P23869|EcoGene:EG10758|GeneID:949038|
4	_MVTFHTNHGDIVIK_	_MVTFHTNHGDIVIK_	MVTFHTNHGDIVIK	33.5686	16128509 GI:16128509	TRUE	_MVTFHTNHGDIVIK_	403.713	NH3	10	b	2	562.235	33.6732	TRUE	gi	16128509 GI:16128509	16128509 GI:16128509	ASAP:ABE-0001806|UniProtKB/Swiss-Prot:P23869|EcoGene:EG10758|GeneID:949038|						GCF_000005845.2_ASM584v2_genomic_29-OCT-2014 _iRT	>gi|16128509 GI:16128509|ASAP:ABE-0001806|UniProtKB/Swiss-Prot:P23869|EcoGene:EG10758|GeneID:949038|
4	_MVTFHTNHGDIVIK_	_MVTFHTNHGDIVIK_	MVTFHTNHGDIVIK	33.5686	16128509 GI:16128509	TRUE	_MVTFHTNHGDIVIK_	403.713	NH3	6	b	1	700.312	9.91198	TRUE	gi	16128509 GI:16128509	16128509 GI:16128509	ASAP:ABE-0001806|UniProtKB/Swiss-Prot:P23869|EcoGene:EG10758|GeneID:949038|						GCF_000005845.2_ASM584v2_genomic_29-OCT-2014 _iRT	>gi|16128509 GI:16128509|ASAP:ABE-0001806|UniProtKB/Swiss-Prot:P23869|EcoGene:EG10758|GeneID:949038|
4	_MVTFHTNHGDIVIK_	_MVTFHTNHGDIVIK_	MVTFHTNHGDIVIK	33.5686	16128509 GI:16128509	TRUE	_MVTFHTNHGDIVIK_	403.713	H2O	13	y	3	488.265	9.98444	TRUE	gi	16128509 GI:16128509	16128509 GI:16128509	ASAP:ABE-0001806|UniProtKB/Swiss-Prot:P23869|EcoGene:EG10758|GeneID:949038|						GCF_000005845.2_ASM584v2_genomic_29-OCT-2014 _iRT	>gi|16128509 GI:16128509|ASAP:ABE-0001806|UniProtKB/Swiss-Prot:P23869|EcoGene:EG10758|GeneID:949038|
2	_HLPVGQR_	_HLPVGQR_	HLPVGQR	-41.8607	16131063 GI:16131063	TRUE	_HLPVGQR_	403.735	noloss	6	y	2	335.206	6.37486	FALSE	gi	16131063 GI:16131063	16131063 GI:16131063	ASAP:ABE-0010428|UniProtKB/Swiss-Prot:P0A6E4|EcoGene:EG10068|GeneID:947590|						GCF_000005845.2_ASM584v2_genomic_29-OCT-2014 _iRT	>gi|16131063 GI:16131063|ASAP:ABE-0010428|UniProtKB/Swiss-Prot:P0A6E4|EcoGene:EG10068|GeneID:947590|
2	_HLPVGQR_	_HLPVGQR_	HLPVGQR	-41.8607	16131063 GI:16131063	TRUE	_HLPVGQR_	403.735	H2O	5	y	1	538.31	5.38752	FALSE	gi	16131063 GI:16131063	16131063 GI:16131063	ASAP:ABE-0010428|UniProtKB/Swiss-Prot:P0A6E4|EcoGene:EG10068|GeneID:947590|						GCF_000005845.2_ASM584v2_genomic_29-OCT-2014 _iRT	>gi|16131063 GI:16131063|ASAP:ABE-0010428|UniProtKB/Swiss-Prot:P0A6E4|EcoGene:EG10068|GeneID:947590|
2	_HLPVGQR_	_HLPVGQR_	HLPVGQR	-41.8607	16131063 GI:16131063	TRUE	_HLPVGQR_	403.735	NH3	5	y	1	539.294	9.5079	FALSE	gi	16131063 GI:16131063	16131063 GI:16131063	ASAP:ABE-0010428|UniProtKB/Swiss-Prot:P0A6E4|EcoGene:EG10068|GeneID:947590|						GCF_000005845.2_ASM584v2_genomic_29-OCT-2014 _iRT	>gi|16131063 GI:16131063|ASAP:ABE-0010428|UniProtKB/Swiss-Prot:P0A6E4|EcoGene:EG10068|GeneID:947590|
2	_HLPVGQR_	_HLPVGQR_	HLPVGQR	-41.8607	16131063 GI:16131063	TRUE	_HLPVGQR_	403.735	noloss	5	y	1	556.32	100	FALSE	gi	16131063 GI:16131063	16131063 GI:16131063	ASAP:ABE-0010428|UniProtKB/Swiss-Prot:P0A6E4|EcoGene:EG10068|GeneID:947590|						GCF_000005845.2_ASM584v2_genomic_29-OCT-2014 _iRT	>gi|16131063 GI:16131063|ASAP:ABE-0010428|UniProtKB/Swiss-Prot:P0A6E4|EcoGene:EG10068|GeneID:947590|
2	_HLPVGQR_	_HLPVGQR_	HLPVGQR	-41.8607	16131063 GI:16131063	TRUE	_HLPVGQR_	403.735	noloss	6	y	1	669.404	10.0103	FALSE	gi	16131063 GI:16131063	16131063 GI:16131063	ASAP:ABE-0010428|UniProtKB/Swiss-Prot:P0A6E4|EcoGene:EG10068|GeneID:947590|						GCF_000005845.2_ASM584v2_genomic_29-OCT-2014 _iRT	>gi|16131063 GI:16131063|ASAP:ABE-0010428|UniProtKB/Swiss-Prot:P0A6E4|EcoGene:EG10068|GeneID:947590|
3	_GEYDFSHEVK_	_GEYDFSHEVK_	GEYDFSHEVK	9.73154	16129643 GI:16129643	TRUE	_GEYDFSHEVK_	404.184	noloss	5	y	2	300.161	23.9737	TRUE	gi	16129643 GI:16129643	16129643 GI:16129643	ASAP:ABE-0005632|UniProtKB/Swiss-Prot:P77748|EcoGene:EG13969|GeneID:946189|						GCF_000005845.2_ASM584v2_genomic_29-OCT-2014 _iRT	>gi|16129643 GI:16129643|ASAP:ABE-0005632|UniProtKB/Swiss-Prot:P77748|EcoGene:EG13969|GeneID:946189|
3	_GEYDFSHEVK_	_GEYDFSHEVK_	GEYDFSHEVK	9.73154	16129643 GI:16129643	TRUE	_GEYDFSHEVK_	404.184	H2O	3	y	1	357.213	31.7791	TRUE	gi	16129643 GI:16129643	16129643 GI:16129643	ASAP:ABE-0005632|UniProtKB/Swiss-Prot:P77748|EcoGene:EG13969|GeneID:946189|						GCF_000005845.2_ASM584v2_genomic_29-OCT-2014 _iRT	>gi|16129643 GI:16129643|ASAP:ABE-0005632|UniProtKB/Swiss-Prot:P77748|EcoGene:EG13969|GeneID:946189|
3	_GEYDFSHEVK_	_GEYDFSHEVK_	GEYDFSHEVK	9.73154	16129643 GI:16129643	TRUE	_GEYDFSHEVK_	404.184	H2O	6	y	2	364.69	5.75655	TRUE	gi	16129643 GI:16129643	16129643 GI:16129643	ASAP:ABE-0005632|UniProtKB/Swiss-Prot:P77748|EcoGene:EG13969|GeneID:946189|						GCF_000005845.2_ASM584v2_genomic_29-OCT-2014 _iRT	>gi|16129643 GI:16129643|ASAP:ABE-0005632|UniProtKB/Swiss-Prot:P77748|EcoGene:EG13969|GeneID:946189|
3	_GEYDFSHEVK_	_GEYDFSHEVK_	GEYDFSHEVK	9.73154	16129643 GI:16129643	TRUE	_GEYDFSHEVK_	404.184	noloss	6	y	2	373.695	42.8671	FALSE	gi	16129643 GI:16129643	16129643 GI:16129643	ASAP:ABE-0005632|UniProtKB/Swiss-Prot:P77748|EcoGene:EG13969|GeneID:946189|						GCF_000005845.2_ASM584v2_genomic_29-OCT-2014 _iRT	>gi|16129643 GI:16129643|ASAP:ABE-0005632|UniProtKB/Swiss-Prot:P77748|EcoGene:EG13969|GeneID:946189|
3	_GEYDFSHEVK_	_GEYDFSHEVK_	GEYDFSHEVK	9.73154	16129643 GI:16129643	TRUE	_GEYDFSHEVK_	404.184	noloss	3	y	1	375.224	21.0843	TRUE	gi	16129643 GI:16129643	16129643 GI:16129643	ASAP:ABE-0005632|UniProtKB/Swiss-Prot:P77748|EcoGene:EG13969|GeneID:946189|						GCF_000005845.2_ASM584v2_genomic_29-OCT-2014 _iRT	>gi|16129643 GI:16129643|ASAP:ABE-0005632|UniProtKB/Swiss-Prot:P77748|EcoGene:EG13969|GeneID:946189|
3	_GEYDFSHEVK_	_GEYDFSHEVK_	GEYDFSHEVK	9.73154	16129643 GI:16129643	TRUE	_GEYDFSHEVK_	404.184	H2O	7	y	2	422.203	12.1094	TRUE	gi	16129643 GI:16129643	16129643 GI:16129643	ASAP:ABE-0005632|UniProtKB/Swiss-Prot:P77748|EcoGene:EG13969|GeneID:946189|						GCF_000005845.2_ASM584v2_genomic_29-OCT-2014 _iRT	>gi|16129643 GI:16129643|ASAP:ABE-0005632|UniProtKB/Swiss-Prot:P77748|EcoGene:EG13969|GeneID:946189|
3	_GEYDFSHEVK_	_GEYDFSHEVK_	GEYDFSHEVK	9.73154	16129643 GI:16129643	TRUE	_GEYDFSHEVK_	404.184	NH3	7	y	2	422.695	8.48757	TRUE	gi	16129643 GI:16129643	16129643 GI:16129643	ASAP:ABE-0005632|UniProtKB/Swiss-Prot:P77748|EcoGene:EG13969|GeneID:946189|						GCF_000005845.2_ASM584v2_genomic_29-OCT-2014 _iRT	>gi|16129643 GI:16129643|ASAP:ABE-0005632|UniProtKB/Swiss-Prot:P77748|EcoGene:EG13969|GeneID:946189|
3	_GEYDFSHEVK_	_GEYDFSHEVK_	GEYDFSHEVK	9.73154	16129643 GI:16129643	TRUE	_GEYDFSHEVK_	404.184	noloss	7	y	2	431.209	32.8931	FALSE	gi	16129643 GI:16129643	16129643 GI:16129643	ASAP:ABE-0005632|UniProtKB/Swiss-Prot:P77748|EcoGene:EG13969|GeneID:946189|						GCF_000005845.2_ASM584v2_genomic_29-OCT-2014 _iRT	>gi|16129643 GI:16129643|ASAP:ABE-0005632|UniProtKB/Swiss-Prot:P77748|EcoGene:EG13969|GeneID:946189|
3	_GEYDFSHEVK_	_GEYDFSHEVK_	GEYDFSHEVK	9.73154	16129643 GI:16129643	TRUE	_GEYDFSHEVK_	404.184	noloss	4	b	1	465.162	7.37982	TRUE	gi	16129643 GI:16129643	16129643 GI:16129643	ASAP:ABE-0005632|UniProtKB/Swiss-Prot:P77748|EcoGene:EG13969|GeneID:946189|						GCF_000005845.2_ASM584v2_genomic_29-OCT-2014 _iRT	>gi|16129643 GI:16129643|ASAP:ABE-0005632|UniProtKB/Swiss-Prot:P77748|EcoGene:EG13969|GeneID:946189|
3	_GEYDFSHEVK_	_GEYDFSHEVK_	GEYDFSHEVK	9.73154	16129643 GI:16129643	TRUE	_GEYDFSHEVK_	404.184	noloss	8	b	2	483.185	8.09578	TRUE	gi	16129643 GI:16129643	16129643 GI:16129643	ASAP:ABE-0005632|UniProtKB/Swiss-Prot:P77748|EcoGene:EG13969|GeneID:946189|						GCF_000005845.2_ASM584v2_genomic_29-OCT-2014 _iRT	>gi|16129643 GI:16129643|ASAP:ABE-0005632|UniProtKB/Swiss-Prot:P77748|EcoGene:EG13969|GeneID:946189|
3	_GEYDFSHEVK_	_GEYDFSHEVK_	GEYDFSHEVK	9.73154	16129643 GI:16129643	TRUE	_GEYDFSHEVK_	404.184	noloss	4	y	1	512.283	61.705	FALSE	gi	16129643 GI:16129643	16129643 GI:16129643	ASAP:ABE-0005632|UniProtKB/Swiss-Prot:P77748|EcoGene:EG13969|GeneID:946189|						GCF_000005845.2_ASM584v2_genomic_29-OCT-2014 _iRT	>gi|16129643 GI:16129643|ASAP:ABE-0005632|UniProtKB/Swiss-Prot:P77748|EcoGene:EG13969|GeneID:946189|
3	_GEYDFSHEVK_	_GEYDFSHEVK_	GEYDFSHEVK	9.73154	16129643 GI:16129643	TRUE	_GEYDFSHEVK_	404.184	noloss	8	y	2	512.74	8.69976	TRUE	gi	16129643 GI:16129643	16129643 GI:16129643	ASAP:ABE-0005632|UniProtKB/Swiss-Prot:P77748|EcoGene:EG13969|GeneID:946189|						GCF_000005845.2_ASM584v2_genomic_29-OCT-2014 _iRT	>gi|16129643 GI:16129643|ASAP:ABE-0005632|UniProtKB/Swiss-Prot:P77748|EcoGene:EG13969|GeneID:946189|
3	_GEYDFSHEVK_	_GEYDFSHEVK_	GEYDFSHEVK	9.73154	16129643 GI:16129643	TRUE	_GEYDFSHEVK_	404.184	H2O	9	y	2	568.256	8.51808	TRUE	gi	16129643 GI:16129643	16129643 GI:16129643	ASAP:ABE-0005632|UniProtKB/Swiss-Prot:P77748|EcoGene:EG13969|GeneID:946189|						GCF_000005845.2_ASM584v2_genomic_29-OCT-2014 _iRT	>gi|16129643 GI:16129643|ASAP:ABE-0005632|UniProtKB/Swiss-Prot:P77748|EcoGene:EG13969|GeneID:946189|
3	_GEYDFSHEVK_	_GEYDFSHEVK_	GEYDFSHEVK	9.73154	16129643 GI:16129643	TRUE	_GEYDFSHEVK_	404.184	H2O	5	y	1	581.304	9.8934	TRUE	gi	16129643 GI:16129643	16129643 GI:16129643	ASAP:ABE-0005632|UniProtKB/Swiss-Prot:P77748|EcoGene:EG13969|GeneID:946189|						GCF_000005845.2_ASM584v2_genomic_29-OCT-2014 _iRT	>gi|16129643 GI:16129643|ASAP:ABE-0005632|UniProtKB/Swiss-Prot:P77748|EcoGene:EG13969|GeneID:946189|
3	_GEYDFSHEVK_	_GEYDFSHEVK_	GEYDFSHEVK	9.73154	16129643 GI:16129643	TRUE	_GEYDFSHEVK_	404.184	NH3	5	y	1	582.288	6.23275	TRUE	gi	16129643 GI:16129643	16129643 GI:16129643	ASAP:ABE-0005632|UniProtKB/Swiss-Prot:P77748|EcoGene:EG13969|GeneID:946189|						GCF_000005845.2_ASM584v2_genomic_29-OCT-2014 _iRT	>gi|16129643 GI:16129643|ASAP:ABE-0005632|UniProtKB/Swiss-Prot:P77748|EcoGene:EG13969|GeneID:946189|
3	_GEYDFSHEVK_	_GEYDFSHEVK_	GEYDFSHEVK	9.73154	16129643 GI:16129643	TRUE	_GEYDFSHEVK_	404.184	noloss	5	y	1	599.315	100	FALSE	gi	16129643 GI:16129643	16129643 GI:16129643	ASAP:ABE-0005632|UniProtKB/Swiss-Prot:P77748|EcoGene:EG13969|GeneID:946189|						GCF_000005845.2_ASM584v2_genomic_29-OCT-2014 _iRT	>gi|16129643 GI:16129643|ASAP:ABE-0005632|UniProtKB/Swiss-Prot:P77748|EcoGene:EG13969|GeneID:946189|
3	_GEYDFSHEVK_	_GEYDFSHEVK_	GEYDFSHEVK	9.73154	16129643 GI:16129643	TRUE	_GEYDFSHEVK_	404.184	H2O	6	y	1	728.373	8.824	TRUE	gi	16129643 GI:16129643	16129643 GI:16129643	ASAP:ABE-0005632|UniProtKB/Swiss-Prot:P77748|EcoGene:EG13969|GeneID:946189|						GCF_000005845.2_ASM584v2_genomic_29-OCT-2014 _iRT	>gi|16129643 GI:16129643|ASAP:ABE-0005632|UniProtKB/Swiss-Prot:P77748|EcoGene:EG13969|GeneID:946189|
3	_GEYDFSHEVK_	_GEYDFSHEVK_	GEYDFSHEVK	9.73154	16129643 GI:16129643	TRUE	_GEYDFSHEVK_	404.184	noloss	6	y	1	746.383	77.447	FALSE	gi	16129643 GI:16129643	16129643 GI:16129643	ASAP:ABE-0005632|UniProtKB/Swiss-Prot:P77748|EcoGene:EG13969|GeneID:946189|						GCF_000005845.2_ASM584v2_genomic_29-OCT-2014 _iRT	>gi|16129643 GI:16129643|ASAP:ABE-0005632|UniProtKB/Swiss-Prot:P77748|EcoGene:EG13969|GeneID:946189|
3	_GEYDFSHEVK_	_GEYDFSHEVK_	GEYDFSHEVK	9.73154	16129643 GI:16129643	TRUE	_GEYDFSHEVK_	404.184	H2O	7	y	1	843.4	7.83392	TRUE	gi	16129643 GI:16129643	16129643 GI:16129643	ASAP:ABE-0005632|UniProtKB/Swiss-Prot:P77748|EcoGene:EG13969|GeneID:946189|						GCF_000005845.2_ASM584v2_genomic_29-OCT-2014 _iRT	>gi|16129643 GI:16129643|ASAP:ABE-0005632|UniProtKB/Swiss-Prot:P77748|EcoGene:EG13969|GeneID:946189|
3	_GEYDFSHEVK_	_GEYDFSHEVK_	GEYDFSHEVK	9.73154	16129643 GI:16129643	TRUE	_GEYDFSHEVK_	404.184	NH3	7	y	1	844.384	9.34383	TRUE	gi	16129643 GI:16129643	16129643 GI:16129643	ASAP:ABE-0005632|UniProtKB/Swiss-Prot:P77748|EcoGene:EG13969|GeneID:946189|						GCF_000005845.2_ASM584v2_genomic_29-OCT-2014 _iRT	>gi|16129643 GI:16129643|ASAP:ABE-0005632|UniProtKB/Swiss-Prot:P77748|EcoGene:EG13969|GeneID:946189|
3	_GEYDFSHEVK_	_GEYDFSHEVK_	GEYDFSHEVK	9.73154	16129643 GI:16129643	TRUE	_GEYDFSHEVK_	404.184	noloss	7	y	1	861.41	77.722	FALSE	gi	16129643 GI:16129643	16129643 GI:16129643	ASAP:ABE-0005632|UniProtKB/Swiss-Prot:P77748|EcoGene:EG13969|GeneID:946189|						GCF_000005845.2_ASM584v2_genomic_29-OCT-2014 _iRT	>gi|16129643 GI:16129643|ASAP:ABE-0005632|UniProtKB/Swiss-Prot:P77748|EcoGene:EG13969|GeneID:946189|
3	_GEYDFSHEVK_	_GEYDFSHEVK_	GEYDFSHEVK	9.73154	16129643 GI:16129643	TRUE	_GEYDFSHEVK_	404.184	NH3	6	y	2	365.182	6.55276	TRUE	gi	16129643 GI:16129643	16129643 GI:16129643	ASAP:ABE-0005632|UniProtKB/Swiss-Prot:P77748|EcoGene:EG13969|GeneID:946189|						GCF_000005845.2_ASM584v2_genomic_29-OCT-2014 _iRT	>gi|16129643 GI:16129643|ASAP:ABE-0005632|UniProtKB/Swiss-Prot:P77748|EcoGene:EG13969|GeneID:946189|
3	_GEYDFSHEVK_	_GEYDFSHEVK_	GEYDFSHEVK	9.73154	16129643 GI:16129643	TRUE	_GEYDFSHEVK_	404.184	H2O	4	y	1	494.272	5.88946	TRUE	gi	16129643 GI:16129643	16129643 GI:16129643	ASAP:ABE-0005632|UniProtKB/Swiss-Prot:P77748|EcoGene:EG13969|GeneID:946189|						GCF_000005845.2_ASM584v2_genomic_29-OCT-2014 _iRT	>gi|16129643 GI:16129643|ASAP:ABE-0005632|UniProtKB/Swiss-Prot:P77748|EcoGene:EG13969|GeneID:946189|
3	_GEYDFSHEVK_	_GEYDFSHEVK_	GEYDFSHEVK	9.73154	16129643 GI:16129643	TRUE	_GEYDFSHEVK_	404.184	NH3	8	y	2	504.227	5.02555	TRUE	gi	16129643 GI:16129643	16129643 GI:16129643	ASAP:ABE-0005632|UniProtKB/Swiss-Prot:P77748|EcoGene:EG13969|GeneID:946189|						GCF_000005845.2_ASM584v2_genomic_29-OCT-2014 _iRT	>gi|16129643 GI:16129643|ASAP:ABE-0005632|UniProtKB/Swiss-Prot:P77748|EcoGene:EG13969|GeneID:946189|
2	_DLSMEGR_	_DLSMEGR_	DLSMEGR	-10.3335	16128066 GI:16128066	TRUE	_DLSMEGR_	404.187	noloss	3	y	1	361.183	18.4812	FALSE	gi	16128066 GI:16128066	16128066 GI:16128066	ASAP:ABE-0000261|UniProtKB/Swiss-Prot:P0A6A6|EcoGene:EG11576|GeneID:945076|						GCF_000005845.2_ASM584v2_genomic_29-OCT-2014 _iRT	>gi|16128066 GI:16128066|ASAP:ABE-0000261|UniProtKB/Swiss-Prot:P0A6A6|EcoGene:EG11576|GeneID:945076|
2	_DLSMEGR_	_DLSMEGR_	DLSMEGR	-10.3335	16128066 GI:16128066	TRUE	_DLSMEGR_	404.187	noloss	4	y	1	492.223	18.2108	FALSE	gi	16128066 GI:16128066	16128066 GI:16128066	ASAP:ABE-0000261|UniProtKB/Swiss-Prot:P0A6A6|EcoGene:EG11576|GeneID:945076|						GCF_000005845.2_ASM584v2_genomic_29-OCT-2014 _iRT	>gi|16128066 GI:16128066|ASAP:ABE-0000261|UniProtKB/Swiss-Prot:P0A6A6|EcoGene:EG11576|GeneID:945076|
2	_DLSMEGR_	_DLSMEGR_	DLSMEGR	-10.3335	16128066 GI:16128066	TRUE	_DLSMEGR_	404.187	H2O	5	y	1	561.245	5.18095	FALSE	gi	16128066 GI:16128066	16128066 GI:16128066	ASAP:ABE-0000261|UniProtKB/Swiss-Prot:P0A6A6|EcoGene:EG11576|GeneID:945076|						GCF_000005845.2_ASM584v2_genomic_29-OCT-2014 _iRT	>gi|16128066 GI:16128066|ASAP:ABE-0000261|UniProtKB/Swiss-Prot:P0A6A6|EcoGene:EG11576|GeneID:945076|
2	_DLSMEGR_	_DLSMEGR_	DLSMEGR	-10.3335	16128066 GI:16128066	TRUE	_DLSMEGR_	404.187	noloss	5	y	1	579.256	100	FALSE	gi	16128066 GI:16128066	16128066 GI:16128066	ASAP:ABE-0000261|UniProtKB/Swiss-Prot:P0A6A6|EcoGene:EG11576|GeneID:945076|						GCF_000005845.2_ASM584v2_genomic_29-OCT-2014 _iRT	>gi|16128066 GI:16128066|ASAP:ABE-0000261|UniProtKB/Swiss-Prot:P0A6A6|EcoGene:EG11576|GeneID:945076|
3	_FGELDYAHMK_	_FGELDYAHMK_	FGELDYAHMK	28.6096	16130513 GI:16130513	TRUE	_FGELDYAHMK_	404.19	noloss	5	y	2	325.16	11.293	TRUE	gi	16130513 GI:16130513	16130513 GI:16130513	ASAP:ABE-0008527|UniProtKB/Swiss-Prot:P63284|EcoGene:EG10157|GeneID:947077|						GCF_000005845.2_ASM584v2_genomic_29-OCT-2014 _iRT	>gi|16130513 GI:16130513|ASAP:ABE-0008527|UniProtKB/Swiss-Prot:P63284|EcoGene:EG10157|GeneID:947077|
3	_FGELDYAHMK_	_FGELDYAHMK_	FGELDYAHMK	28.6096	16130513 GI:16130513	TRUE	_FGELDYAHMK_	404.19	noloss	3	b	1	334.14	18.3911	FALSE	gi	16130513 GI:16130513	16130513 GI:16130513	ASAP:ABE-0008527|UniProtKB/Swiss-Prot:P63284|EcoGene:EG10157|GeneID:947077|						GCF_000005845.2_ASM584v2_genomic_29-OCT-2014 _iRT	>gi|16130513 GI:16130513|ASAP:ABE-0008527|UniProtKB/Swiss-Prot:P63284|EcoGene:EG10157|GeneID:947077|
3	_FGELDYAHMK_	_FGELDYAHMK_	FGELDYAHMK	28.6096	16130513 GI:16130513	TRUE	_FGELDYAHMK_	404.19	noloss	6	y	2	382.673	7.41462	TRUE	gi	16130513 GI:16130513	16130513 GI:16130513	ASAP:ABE-0008527|UniProtKB/Swiss-Prot:P63284|EcoGene:EG10157|GeneID:947077|						GCF_000005845.2_ASM584v2_genomic_29-OCT-2014 _iRT	>gi|16130513 GI:16130513|ASAP:ABE-0008527|UniProtKB/Swiss-Prot:P63284|EcoGene:EG10157|GeneID:947077|
3	_FGELDYAHMK_	_FGELDYAHMK_	FGELDYAHMK	28.6096	16130513 GI:16130513	TRUE	_FGELDYAHMK_	404.19	noloss	3	y	1	415.212	63.1802	FALSE	gi	16130513 GI:16130513	16130513 GI:16130513	ASAP:ABE-0008527|UniProtKB/Swiss-Prot:P63284|EcoGene:EG10157|GeneID:947077|						GCF_000005845.2_ASM584v2_genomic_29-OCT-2014 _iRT	>gi|16130513 GI:16130513|ASAP:ABE-0008527|UniProtKB/Swiss-Prot:P63284|EcoGene:EG10157|GeneID:947077|
3	_FGELDYAHMK_	_FGELDYAHMK_	FGELDYAHMK	28.6096	16130513 GI:16130513	TRUE	_FGELDYAHMK_	404.19	noloss	7	y	2	439.215	7.14616	TRUE	gi	16130513 GI:16130513	16130513 GI:16130513	ASAP:ABE-0008527|UniProtKB/Swiss-Prot:P63284|EcoGene:EG10157|GeneID:947077|						GCF_000005845.2_ASM584v2_genomic_29-OCT-2014 _iRT	>gi|16130513 GI:16130513|ASAP:ABE-0008527|UniProtKB/Swiss-Prot:P63284|EcoGene:EG10157|GeneID:947077|
3	_FGELDYAHMK_	_FGELDYAHMK_	FGELDYAHMK	28.6096	16130513 GI:16130513	TRUE	_FGELDYAHMK_	404.19	noloss	4	y	1	486.249	56.2743	FALSE	gi	16130513 GI:16130513	16130513 GI:16130513	ASAP:ABE-0008527|UniProtKB/Swiss-Prot:P63284|EcoGene:EG10157|GeneID:947077|						GCF_000005845.2_ASM584v2_genomic_29-OCT-2014 _iRT	>gi|16130513 GI:16130513|ASAP:ABE-0008527|UniProtKB/Swiss-Prot:P63284|EcoGene:EG10157|GeneID:947077|
3	_FGELDYAHMK_	_FGELDYAHMK_	FGELDYAHMK	28.6096	16130513 GI:16130513	TRUE	_FGELDYAHMK_	404.19	H2O	8	y	2	494.731	7.6594	TRUE	gi	16130513 GI:16130513	16130513 GI:16130513	ASAP:ABE-0008527|UniProtKB/Swiss-Prot:P63284|EcoGene:EG10157|GeneID:947077|						GCF_000005845.2_ASM584v2_genomic_29-OCT-2014 _iRT	>gi|16130513 GI:16130513|ASAP:ABE-0008527|UniProtKB/Swiss-Prot:P63284|EcoGene:EG10157|GeneID:947077|
3	_FGELDYAHMK_	_FGELDYAHMK_	FGELDYAHMK	28.6096	16130513 GI:16130513	TRUE	_FGELDYAHMK_	404.19	H2O	5	b	1	544.24	6.03374	TRUE	gi	16130513 GI:16130513	16130513 GI:16130513	ASAP:ABE-0008527|UniProtKB/Swiss-Prot:P63284|EcoGene:EG10157|GeneID:947077|						GCF_000005845.2_ASM584v2_genomic_29-OCT-2014 _iRT	>gi|16130513 GI:16130513|ASAP:ABE-0008527|UniProtKB/Swiss-Prot:P63284|EcoGene:EG10157|GeneID:947077|
3	_FGELDYAHMK_	_FGELDYAHMK_	FGELDYAHMK	28.6096	16130513 GI:16130513	TRUE	_FGELDYAHMK_	404.19	noloss	5	b	1	562.251	12.4306	TRUE	gi	16130513 GI:16130513	16130513 GI:16130513	ASAP:ABE-0008527|UniProtKB/Swiss-Prot:P63284|EcoGene:EG10157|GeneID:947077|						GCF_000005845.2_ASM584v2_genomic_29-OCT-2014 _iRT	>gi|16130513 GI:16130513|ASAP:ABE-0008527|UniProtKB/Swiss-Prot:P63284|EcoGene:EG10157|GeneID:947077|
3	_FGELDYAHMK_	_FGELDYAHMK_	FGELDYAHMK	28.6096	16130513 GI:16130513	TRUE	_FGELDYAHMK_	404.19	noloss	5	y	1	649.313	70.2785	FALSE	gi	16130513 GI:16130513	16130513 GI:16130513	ASAP:ABE-0008527|UniProtKB/Swiss-Prot:P63284|EcoGene:EG10157|GeneID:947077|						GCF_000005845.2_ASM584v2_genomic_29-OCT-2014 _iRT	>gi|16130513 GI:16130513|ASAP:ABE-0008527|UniProtKB/Swiss-Prot:P63284|EcoGene:EG10157|GeneID:947077|
3	_FGELDYAHMK_	_FGELDYAHMK_	FGELDYAHMK	28.6096	16130513 GI:16130513	TRUE	_FGELDYAHMK_	404.19	H2O	6	y	1	746.329	7.60276	TRUE	gi	16130513 GI:16130513	16130513 GI:16130513	ASAP:ABE-0008527|UniProtKB/Swiss-Prot:P63284|EcoGene:EG10157|GeneID:947077|						GCF_000005845.2_ASM584v2_genomic_29-OCT-2014 _iRT	>gi|16130513 GI:16130513|ASAP:ABE-0008527|UniProtKB/Swiss-Prot:P63284|EcoGene:EG10157|GeneID:947077|
3	_FGELDYAHMK_	_FGELDYAHMK_	FGELDYAHMK	28.6096	16130513 GI:16130513	TRUE	_FGELDYAHMK_	404.19	noloss	6	y	1	764.34	100	FALSE	gi	16130513 GI:16130513	16130513 GI:16130513	ASAP:ABE-0008527|UniProtKB/Swiss-Prot:P63284|EcoGene:EG10157|GeneID:947077|						GCF_000005845.2_ASM584v2_genomic_29-OCT-2014 _iRT	>gi|16130513 GI:16130513|ASAP:ABE-0008527|UniProtKB/Swiss-Prot:P63284|EcoGene:EG10157|GeneID:947077|
3	_FGELDYAHMK_	_FGELDYAHMK_	FGELDYAHMK	28.6096	16130513 GI:16130513	TRUE	_FGELDYAHMK_	404.19	noloss	7	y	1	877.424	43.2007	FALSE	gi	16130513 GI:16130513	16130513 GI:16130513	ASAP:ABE-0008527|UniProtKB/Swiss-Prot:P63284|EcoGene:EG10157|GeneID:947077|						GCF_000005845.2_ASM584v2_genomic_29-OCT-2014 _iRT	>gi|16130513 GI:16130513|ASAP:ABE-0008527|UniProtKB/Swiss-Prot:P63284|EcoGene:EG10157|GeneID:947077|
2	_M[+16]QNSALK_	_M[Oxidation]QNSALK_	MQNSALK	-54.812	16128701 GI:16128701	TRUE	_M[Oxidation]QNSALK_	404.205	noloss	3	y	1	331.234	44.6345	FALSE	gi	16128701 GI:16128701	16128701 GI:16128701	ASAP:ABE-0002478|UniProtKB/Swiss-Prot:P0AFG3|EcoGene:EG10979|GeneID:945303|						GCF_000005845.2_ASM584v2_genomic_29-OCT-2014 _iRT	>gi|16128701 GI:16128701|ASAP:ABE-0002478|UniProtKB/Swiss-Prot:P0AFG3|EcoGene:EG10979|GeneID:945303|
2	_M[+16]QNSALK_	_M[Oxidation]QNSALK_	MQNSALK	-54.812	16128701 GI:16128701	TRUE	_M[Oxidation]QNSALK_	404.205	noloss	4	y	1	418.266	67.3578	FALSE	gi	16128701 GI:16128701	16128701 GI:16128701	ASAP:ABE-0002478|UniProtKB/Swiss-Prot:P0AFG3|EcoGene:EG10979|GeneID:945303|						GCF_000005845.2_ASM584v2_genomic_29-OCT-2014 _iRT	>gi|16128701 GI:16128701|ASAP:ABE-0002478|UniProtKB/Swiss-Prot:P0AFG3|EcoGene:EG10979|GeneID:945303|
2	_M[+16]QNSALK_	_M[Oxidation]QNSALK_	MQNSALK	-54.812	16128701 GI:16128701	TRUE	_M[Oxidation]QNSALK_	404.205	noloss	5	y	1	532.309	92.7455	FALSE	gi	16128701 GI:16128701	16128701 GI:16128701	ASAP:ABE-0002478|UniProtKB/Swiss-Prot:P0AFG3|EcoGene:EG10979|GeneID:945303|						GCF_000005845.2_ASM584v2_genomic_29-OCT-2014 _iRT	>gi|16128701 GI:16128701|ASAP:ABE-0002478|UniProtKB/Swiss-Prot:P0AFG3|EcoGene:EG10979|GeneID:945303|
2	_M[+16]QNSALK_	_M[Oxidation]QNSALK_	MQNSALK	-54.812	16128701 GI:16128701	TRUE	_M[Oxidation]QNSALK_	404.205	NH3	6	y	1	643.341	100	FALSE	gi	16128701 GI:16128701	16128701 GI:16128701	ASAP:ABE-0002478|UniProtKB/Swiss-Prot:P0AFG3|EcoGene:EG10979|GeneID:945303|						GCF_000005845.2_ASM584v2_genomic_29-OCT-2014 _iRT	>gi|16128701 GI:16128701|ASAP:ABE-0002478|UniProtKB/Swiss-Prot:P0AFG3|EcoGene:EG10979|GeneID:945303|
3	_WILDHVEGSR_	_WILDHVEGSR_	WILDHVEGSR	32.6661	16131764 GI:16131764	TRUE	_WILDHVEGSR_	404.544	NH3	3	y	1	302.146	5.5864	TRUE	gi	16131764 GI:16131764	16131764 GI:16131764	ASAP:ABE-0012825|UniProtKB/Swiss-Prot:P0A6F3|EcoGene:EG10398|GeneID:948423|						GCF_000005845.2_ASM584v2_genomic_29-OCT-2014 _iRT	>gi|16131764 GI:16131764|ASAP:ABE-0012825|UniProtKB/Swiss-Prot:P0A6F3|EcoGene:EG10398|GeneID:948423|
3	_WILDHVEGSR_	_WILDHVEGSR_	WILDHVEGSR	32.6661	16131764 GI:16131764	TRUE	_WILDHVEGSR_	404.544	noloss	3	y	1	319.172	45.0604	FALSE	gi	16131764 GI:16131764	16131764 GI:16131764	ASAP:ABE-0012825|UniProtKB/Swiss-Prot:P0A6F3|EcoGene:EG10398|GeneID:948423|						GCF_000005845.2_ASM584v2_genomic_29-OCT-2014 _iRT	>gi|16131764 GI:16131764|ASAP:ABE-0012825|UniProtKB/Swiss-Prot:P0A6F3|EcoGene:EG10398|GeneID:948423|
3	_WILDHVEGSR_	_WILDHVEGSR_	WILDHVEGSR	32.6661	16131764 GI:16131764	TRUE	_WILDHVEGSR_	404.544	NH3	5	b	2	324.661	7.57698	TRUE	gi	16131764 GI:16131764	16131764 GI:16131764	ASAP:ABE-0012825|UniProtKB/Swiss-Prot:P0A6F3|EcoGene:EG10398|GeneID:948423|						GCF_000005845.2_ASM584v2_genomic_29-OCT-2014 _iRT	>gi|16131764 GI:16131764|ASAP:ABE-0012825|UniProtKB/Swiss-Prot:P0A6F3|EcoGene:EG10398|GeneID:948423|
3	_WILDHVEGSR_	_WILDHVEGSR_	WILDHVEGSR	32.6661	16131764 GI:16131764	TRUE	_WILDHVEGSR_	404.544	noloss	6	y	2	342.675	65.8315	FALSE	gi	16131764 GI:16131764	16131764 GI:16131764	ASAP:ABE-0012825|UniProtKB/Swiss-Prot:P0A6F3|EcoGene:EG10398|GeneID:948423|						GCF_000005845.2_ASM584v2_genomic_29-OCT-2014 _iRT	>gi|16131764 GI:16131764|ASAP:ABE-0012825|UniProtKB/Swiss-Prot:P0A6F3|EcoGene:EG10398|GeneID:948423|
3	_WILDHVEGSR_	_WILDHVEGSR_	WILDHVEGSR	32.6661	16131764 GI:16131764	TRUE	_WILDHVEGSR_	404.544	H2O	7	y	2	391.183	13.2659	TRUE	gi	16131764 GI:16131764	16131764 GI:16131764	ASAP:ABE-0012825|UniProtKB/Swiss-Prot:P0A6F3|EcoGene:EG10398|GeneID:948423|						GCF_000005845.2_ASM584v2_genomic_29-OCT-2014 _iRT	>gi|16131764 GI:16131764|ASAP:ABE-0012825|UniProtKB/Swiss-Prot:P0A6F3|EcoGene:EG10398|GeneID:948423|
3	_WILDHVEGSR_	_WILDHVEGSR_	WILDHVEGSR	32.6661	16131764 GI:16131764	TRUE	_WILDHVEGSR_	404.544	NH3	7	y	2	391.675	5.93151	TRUE	gi	16131764 GI:16131764	16131764 GI:16131764	ASAP:ABE-0012825|UniProtKB/Swiss-Prot:P0A6F3|EcoGene:EG10398|GeneID:948423|						GCF_000005845.2_ASM584v2_genomic_29-OCT-2014 _iRT	>gi|16131764 GI:16131764|ASAP:ABE-0012825|UniProtKB/Swiss-Prot:P0A6F3|EcoGene:EG10398|GeneID:948423|
3	_WILDHVEGSR_	_WILDHVEGSR_	WILDHVEGSR	32.6661	16131764 GI:16131764	TRUE	_WILDHVEGSR_	404.544	noloss	7	y	2	400.188	40.0141	FALSE	gi	16131764 GI:16131764	16131764 GI:16131764	ASAP:ABE-0012825|UniProtKB/Swiss-Prot:P0A6F3|EcoGene:EG10398|GeneID:948423|						GCF_000005845.2_ASM584v2_genomic_29-OCT-2014 _iRT	>gi|16131764 GI:16131764|ASAP:ABE-0012825|UniProtKB/Swiss-Prot:P0A6F3|EcoGene:EG10398|GeneID:948423|
3	_WILDHVEGSR_	_WILDHVEGSR_	WILDHVEGSR	32.6661	16131764 GI:16131764	TRUE	_WILDHVEGSR_	404.544	H2O	4	y	1	430.204	10.4876	TRUE	gi	16131764 GI:16131764	16131764 GI:16131764	ASAP:ABE-0012825|UniProtKB/Swiss-Prot:P0A6F3|EcoGene:EG10398|GeneID:948423|						GCF_000005845.2_ASM584v2_genomic_29-OCT-2014 _iRT	>gi|16131764 GI:16131764|ASAP:ABE-0012825|UniProtKB/Swiss-Prot:P0A6F3|EcoGene:EG10398|GeneID:948423|
3	_WILDHVEGSR_	_WILDHVEGSR_	WILDHVEGSR	32.6661	16131764 GI:16131764	TRUE	_WILDHVEGSR_	404.544	H2O	8	y	2	447.725	13.7322	TRUE	gi	16131764 GI:16131764	16131764 GI:16131764	ASAP:ABE-0012825|UniProtKB/Swiss-Prot:P0A6F3|EcoGene:EG10398|GeneID:948423|						GCF_000005845.2_ASM584v2_genomic_29-OCT-2014 _iRT	>gi|16131764 GI:16131764|ASAP:ABE-0012825|UniProtKB/Swiss-Prot:P0A6F3|EcoGene:EG10398|GeneID:948423|
3	_WILDHVEGSR_	_WILDHVEGSR_	WILDHVEGSR	32.6661	16131764 GI:16131764	TRUE	_WILDHVEGSR_	404.544	noloss	4	y	1	448.215	100	FALSE	gi	16131764 GI:16131764	16131764 GI:16131764	ASAP:ABE-0012825|UniProtKB/Swiss-Prot:P0A6F3|EcoGene:EG10398|GeneID:948423|						GCF_000005845.2_ASM584v2_genomic_29-OCT-2014 _iRT	>gi|16131764 GI:16131764|ASAP:ABE-0012825|UniProtKB/Swiss-Prot:P0A6F3|EcoGene:EG10398|GeneID:948423|
3	_WILDHVEGSR_	_WILDHVEGSR_	WILDHVEGSR	32.6661	16131764 GI:16131764	TRUE	_WILDHVEGSR_	404.544	noloss	8	y	2	456.73	32.2772	TRUE	gi	16131764 GI:16131764	16131764 GI:16131764	ASAP:ABE-0012825|UniProtKB/Swiss-Prot:P0A6F3|EcoGene:EG10398|GeneID:948423|						GCF_000005845.2_ASM584v2_genomic_29-OCT-2014 _iRT	>gi|16131764 GI:16131764|ASAP:ABE-0012825|UniProtKB/Swiss-Prot:P0A6F3|EcoGene:EG10398|GeneID:948423|
3	_WILDHVEGSR_	_WILDHVEGSR_	WILDHVEGSR	32.6661	16131764 GI:16131764	TRUE	_WILDHVEGSR_	404.544	NH3	4	b	1	511.255	9.69984	TRUE	gi	16131764 GI:16131764	16131764 GI:16131764	ASAP:ABE-0012825|UniProtKB/Swiss-Prot:P0A6F3|EcoGene:EG10398|GeneID:948423|						GCF_000005845.2_ASM584v2_genomic_29-OCT-2014 _iRT	>gi|16131764 GI:16131764|ASAP:ABE-0012825|UniProtKB/Swiss-Prot:P0A6F3|EcoGene:EG10398|GeneID:948423|
3	_WILDHVEGSR_	_WILDHVEGSR_	WILDHVEGSR	32.6661	16131764 GI:16131764	TRUE	_WILDHVEGSR_	404.544	noloss	9	y	2	513.272	15.7815	TRUE	gi	16131764 GI:16131764	16131764 GI:16131764	ASAP:ABE-0012825|UniProtKB/Swiss-Prot:P0A6F3|EcoGene:EG10398|GeneID:948423|						GCF_000005845.2_ASM584v2_genomic_29-OCT-2014 _iRT	>gi|16131764 GI:16131764|ASAP:ABE-0012825|UniProtKB/Swiss-Prot:P0A6F3|EcoGene:EG10398|GeneID:948423|
3	_WILDHVEGSR_	_WILDHVEGSR_	WILDHVEGSR	32.6661	16131764 GI:16131764	TRUE	_WILDHVEGSR_	404.544	noloss	5	y	1	547.283	89.4185	FALSE	gi	16131764 GI:16131764	16131764 GI:16131764	ASAP:ABE-0012825|UniProtKB/Swiss-Prot:P0A6F3|EcoGene:EG10398|GeneID:948423|						GCF_000005845.2_ASM584v2_genomic_29-OCT-2014 _iRT	>gi|16131764 GI:16131764|ASAP:ABE-0012825|UniProtKB/Swiss-Prot:P0A6F3|EcoGene:EG10398|GeneID:948423|
3	_WILDHVEGSR_	_WILDHVEGSR_	WILDHVEGSR	32.6661	16131764 GI:16131764	TRUE	_WILDHVEGSR_	404.544	noloss	6	y	1	684.342	36.8047	TRUE	gi	16131764 GI:16131764	16131764 GI:16131764	ASAP:ABE-0012825|UniProtKB/Swiss-Prot:P0A6F3|EcoGene:EG10398|GeneID:948423|						GCF_000005845.2_ASM584v2_genomic_29-OCT-2014 _iRT	>gi|16131764 GI:16131764|ASAP:ABE-0012825|UniProtKB/Swiss-Prot:P0A6F3|EcoGene:EG10398|GeneID:948423|
3	_WILDHVEGSR_	_WILDHVEGSR_	WILDHVEGSR	32.6661	16131764 GI:16131764	TRUE	_WILDHVEGSR_	404.544	noloss	7	y	1	799.369	42.1358	FALSE	gi	16131764 GI:16131764	16131764 GI:16131764	ASAP:ABE-0012825|UniProtKB/Swiss-Prot:P0A6F3|EcoGene:EG10398|GeneID:948423|						GCF_000005845.2_ASM584v2_genomic_29-OCT-2014 _iRT	>gi|16131764 GI:16131764|ASAP:ABE-0012825|UniProtKB/Swiss-Prot:P0A6F3|EcoGene:EG10398|GeneID:948423|
3	_WILDHVEGSR_	_WILDHVEGSR_	WILDHVEGSR	32.6661	16131764 GI:16131764	TRUE	_WILDHVEGSR_	404.544	noloss	8	y	1	912.453	7.99461	TRUE	gi	16131764 GI:16131764	16131764 GI:16131764	ASAP:ABE-0012825|UniProtKB/Swiss-Prot:P0A6F3|EcoGene:EG10398|GeneID:948423|						GCF_000005845.2_ASM584v2_genomic_29-OCT-2014 _iRT	>gi|16131764 GI:16131764|ASAP:ABE-0012825|UniProtKB/Swiss-Prot:P0A6F3|EcoGene:EG10398|GeneID:948423|
3	_LFDYLFTHR_	_LFDYLFTHR_	LFDYLFTHR	65.1737	16129952 GI:16129952	TRUE	_LFDYLFTHR_	404.545	noloss	5	y	2	337.193	7.46199	TRUE	gi	16129952 GI:16129952	16129952 GI:16129952	ASAP:ABE-0006686|UniProtKB/Swiss-Prot:P04995|EcoGene:EG10926|GeneID:946529|						GCF_000005845.2_ASM584v2_genomic_29-OCT-2014 _iRT	>gi|16129952 GI:16129952|ASAP:ABE-0006686|UniProtKB/Swiss-Prot:P04995|EcoGene:EG10926|GeneID:946529|
3	_LFDYLFTHR_	_LFDYLFTHR_	LFDYLFTHR	65.1737	16129952 GI:16129952	TRUE	_LFDYLFTHR_	404.545	noloss	3	b	1	376.187	11.8866	FALSE	gi	16129952 GI:16129952	16129952 GI:16129952	ASAP:ABE-0006686|UniProtKB/Swiss-Prot:P04995|EcoGene:EG10926|GeneID:946529|						GCF_000005845.2_ASM584v2_genomic_29-OCT-2014 _iRT	>gi|16129952 GI:16129952|ASAP:ABE-0006686|UniProtKB/Swiss-Prot:P04995|EcoGene:EG10926|GeneID:946529|
3	_LFDYLFTHR_	_LFDYLFTHR_	LFDYLFTHR	65.1737	16129952 GI:16129952	TRUE	_LFDYLFTHR_	404.545	NH3	3	y	1	396.199	9.54575	TRUE	gi	16129952 GI:16129952	16129952 GI:16129952	ASAP:ABE-0006686|UniProtKB/Swiss-Prot:P04995|EcoGene:EG10926|GeneID:946529|						GCF_000005845.2_ASM584v2_genomic_29-OCT-2014 _iRT	>gi|16129952 GI:16129952|ASAP:ABE-0006686|UniProtKB/Swiss-Prot:P04995|EcoGene:EG10926|GeneID:946529|
3	_LFDYLFTHR_	_LFDYLFTHR_	LFDYLFTHR	65.1737	16129952 GI:16129952	TRUE	_LFDYLFTHR_	404.545	noloss	3	y	1	413.226	48.9003	FALSE	gi	16129952 GI:16129952	16129952 GI:16129952	ASAP:ABE-0006686|UniProtKB/Swiss-Prot:P04995|EcoGene:EG10926|GeneID:946529|						GCF_000005845.2_ASM584v2_genomic_29-OCT-2014 _iRT	>gi|16129952 GI:16129952|ASAP:ABE-0006686|UniProtKB/Swiss-Prot:P04995|EcoGene:EG10926|GeneID:946529|
3	_LFDYLFTHR_	_LFDYLFTHR_	LFDYLFTHR	65.1737	16129952 GI:16129952	TRUE	_LFDYLFTHR_	404.545	noloss	7	y	2	476.238	5.85022	TRUE	gi	16129952 GI:16129952	16129952 GI:16129952	ASAP:ABE-0006686|UniProtKB/Swiss-Prot:P04995|EcoGene:EG10926|GeneID:946529|						GCF_000005845.2_ASM584v2_genomic_29-OCT-2014 _iRT	>gi|16129952 GI:16129952|ASAP:ABE-0006686|UniProtKB/Swiss-Prot:P04995|EcoGene:EG10926|GeneID:946529|
3	_LFDYLFTHR_	_LFDYLFTHR_	LFDYLFTHR	65.1737	16129952 GI:16129952	TRUE	_LFDYLFTHR_	404.545	H2O	8	y	2	540.767	7.40807	TRUE	gi	16129952 GI:16129952	16129952 GI:16129952	ASAP:ABE-0006686|UniProtKB/Swiss-Prot:P04995|EcoGene:EG10926|GeneID:946529|						GCF_000005845.2_ASM584v2_genomic_29-OCT-2014 _iRT	>gi|16129952 GI:16129952|ASAP:ABE-0006686|UniProtKB/Swiss-Prot:P04995|EcoGene:EG10926|GeneID:946529|
3	_LFDYLFTHR_	_LFDYLFTHR_	LFDYLFTHR	65.1737	16129952 GI:16129952	TRUE	_LFDYLFTHR_	404.545	NH3	8	y	2	541.259	8.86104	TRUE	gi	16129952 GI:16129952	16129952 GI:16129952	ASAP:ABE-0006686|UniProtKB/Swiss-Prot:P04995|EcoGene:EG10926|GeneID:946529|						GCF_000005845.2_ASM584v2_genomic_29-OCT-2014 _iRT	>gi|16129952 GI:16129952|ASAP:ABE-0006686|UniProtKB/Swiss-Prot:P04995|EcoGene:EG10926|GeneID:946529|
3	_LFDYLFTHR_	_LFDYLFTHR_	LFDYLFTHR	65.1737	16129952 GI:16129952	TRUE	_LFDYLFTHR_	404.545	H2O	4	y	1	542.283	7.9245	TRUE	gi	16129952 GI:16129952	16129952 GI:16129952	ASAP:ABE-0006686|UniProtKB/Swiss-Prot:P04995|EcoGene:EG10926|GeneID:946529|						GCF_000005845.2_ASM584v2_genomic_29-OCT-2014 _iRT	>gi|16129952 GI:16129952|ASAP:ABE-0006686|UniProtKB/Swiss-Prot:P04995|EcoGene:EG10926|GeneID:946529|
3	_LFDYLFTHR_	_LFDYLFTHR_	LFDYLFTHR	65.1737	16129952 GI:16129952	TRUE	_LFDYLFTHR_	404.545	NH3	4	y	1	543.267	7.29803	TRUE	gi	16129952 GI:16129952	16129952 GI:16129952	ASAP:ABE-0006686|UniProtKB/Swiss-Prot:P04995|EcoGene:EG10926|GeneID:946529|						GCF_000005845.2_ASM584v2_genomic_29-OCT-2014 _iRT	>gi|16129952 GI:16129952|ASAP:ABE-0006686|UniProtKB/Swiss-Prot:P04995|EcoGene:EG10926|GeneID:946529|
3	_LFDYLFTHR_	_LFDYLFTHR_	LFDYLFTHR	65.1737	16129952 GI:16129952	TRUE	_LFDYLFTHR_	404.545	noloss	4	y	1	560.294	100	FALSE	gi	16129952 GI:16129952	16129952 GI:16129952	ASAP:ABE-0006686|UniProtKB/Swiss-Prot:P04995|EcoGene:EG10926|GeneID:946529|						GCF_000005845.2_ASM584v2_genomic_29-OCT-2014 _iRT	>gi|16129952 GI:16129952|ASAP:ABE-0006686|UniProtKB/Swiss-Prot:P04995|EcoGene:EG10926|GeneID:946529|
3	_LFDYLFTHR_	_LFDYLFTHR_	LFDYLFTHR	65.1737	16129952 GI:16129952	TRUE	_LFDYLFTHR_	404.545	NH3	5	y	1	656.351	5.23189	TRUE	gi	16129952 GI:16129952	16129952 GI:16129952	ASAP:ABE-0006686|UniProtKB/Swiss-Prot:P04995|EcoGene:EG10926|GeneID:946529|						GCF_000005845.2_ASM584v2_genomic_29-OCT-2014 _iRT	>gi|16129952 GI:16129952|ASAP:ABE-0006686|UniProtKB/Swiss-Prot:P04995|EcoGene:EG10926|GeneID:946529|
3	_LFDYLFTHR_	_LFDYLFTHR_	LFDYLFTHR	65.1737	16129952 GI:16129952	TRUE	_LFDYLFTHR_	404.545	noloss	5	y	1	673.378	53.6318	FALSE	gi	16129952 GI:16129952	16129952 GI:16129952	ASAP:ABE-0006686|UniProtKB/Swiss-Prot:P04995|EcoGene:EG10926|GeneID:946529|						GCF_000005845.2_ASM584v2_genomic_29-OCT-2014 _iRT	>gi|16129952 GI:16129952|ASAP:ABE-0006686|UniProtKB/Swiss-Prot:P04995|EcoGene:EG10926|GeneID:946529|
3	_LFDYLFTHR_	_LFDYLFTHR_	LFDYLFTHR	65.1737	16129952 GI:16129952	TRUE	_LFDYLFTHR_	404.545	noloss	6	y	1	836.441	22.9411	FALSE	gi	16129952 GI:16129952	16129952 GI:16129952	ASAP:ABE-0006686|UniProtKB/Swiss-Prot:P04995|EcoGene:EG10926|GeneID:946529|						GCF_000005845.2_ASM584v2_genomic_29-OCT-2014 _iRT	>gi|16129952 GI:16129952|ASAP:ABE-0006686|UniProtKB/Swiss-Prot:P04995|EcoGene:EG10926|GeneID:946529|
3	_LFDYLFTHR_	_LFDYLFTHR_	LFDYLFTHR	65.1737	16129952 GI:16129952	TRUE	_LFDYLFTHR_	404.545	noloss	7	y	1	951.468	15.7394	FALSE	gi	16129952 GI:16129952	16129952 GI:16129952	ASAP:ABE-0006686|UniProtKB/Swiss-Prot:P04995|EcoGene:EG10926|GeneID:946529|						GCF_000005845.2_ASM584v2_genomic_29-OCT-2014 _iRT	>gi|16129952 GI:16129952|ASAP:ABE-0006686|UniProtKB/Swiss-Prot:P04995|EcoGene:EG10926|GeneID:946529|
2	_LDNM[+16]ATK_	_LDNM[Oxidation]ATK_	LDNMATK	-57.2576	16129633 GI:16129633	TRUE	_LDNM[Oxidation]ATK_	404.697	H2O	3	y	1	301.187	8.33766	TRUE	gi	16129633 GI:16129633	16129633 GI:16129633	ASAP:ABE-0005603|UniProtKB/Swiss-Prot:P69776|EcoGene:EG10544|GeneID:946175|						GCF_000005845.2_ASM584v2_genomic_29-OCT-2014 _iRT	>gi|16129633 GI:16129633|ASAP:ABE-0005603|UniProtKB/Swiss-Prot:P69776|EcoGene:EG10544|GeneID:946175|
2	_LDNM[+16]ATK_	_LDNM[Oxidation]ATK_	LDNMATK	-57.2576	16129633 GI:16129633	TRUE	_LDNM[Oxidation]ATK_	404.697	noloss	3	y	1	319.198	23.6141	FALSE	gi	16129633 GI:16129633	16129633 GI:16129633	ASAP:ABE-0005603|UniProtKB/Swiss-Prot:P69776|EcoGene:EG10544|GeneID:946175|						GCF_000005845.2_ASM584v2_genomic_29-OCT-2014 _iRT	>gi|16129633 GI:16129633|ASAP:ABE-0005603|UniProtKB/Swiss-Prot:P69776|EcoGene:EG10544|GeneID:946175|
2	_LDNM[+16]ATK_	_LDNM[Oxidation]ATK_	LDNMATK	-57.2576	16129633 GI:16129633	TRUE	_LDNM[Oxidation]ATK_	404.697	1(+C+H4+O+S)	4	y	1	402.235	13.7954	TRUE	gi	16129633 GI:16129633	16129633 GI:16129633	ASAP:ABE-0005603|UniProtKB/Swiss-Prot:P69776|EcoGene:EG10544|GeneID:946175|						GCF_000005845.2_ASM584v2_genomic_29-OCT-2014 _iRT	>gi|16129633 GI:16129633|ASAP:ABE-0005603|UniProtKB/Swiss-Prot:P69776|EcoGene:EG10544|GeneID:946175|
2	_LDNM[+16]ATK_	_LDNM[Oxidation]ATK_	LDNMATK	-57.2576	16129633 GI:16129633	TRUE	_LDNM[Oxidation]ATK_	404.697	noloss	4	y	1	466.233	18.2512	TRUE	gi	16129633 GI:16129633	16129633 GI:16129633	ASAP:ABE-0005603|UniProtKB/Swiss-Prot:P69776|EcoGene:EG10544|GeneID:946175|						GCF_000005845.2_ASM584v2_genomic_29-OCT-2014 _iRT	>gi|16129633 GI:16129633|ASAP:ABE-0005603|UniProtKB/Swiss-Prot:P69776|EcoGene:EG10544|GeneID:946175|
2	_LDNM[+16]ATK_	_LDNM[Oxidation]ATK_	LDNMATK	-57.2576	16129633 GI:16129633	TRUE	_LDNM[Oxidation]ATK_	404.697	1(+C+H4+O+S)	5	y	1	516.278	53.4394	FALSE	gi	16129633 GI:16129633	16129633 GI:16129633	ASAP:ABE-0005603|UniProtKB/Swiss-Prot:P69776|EcoGene:EG10544|GeneID:946175|						GCF_000005845.2_ASM584v2_genomic_29-OCT-2014 _iRT	>gi|16129633 GI:16129633|ASAP:ABE-0005603|UniProtKB/Swiss-Prot:P69776|EcoGene:EG10544|GeneID:946175|
2	_LDNM[+16]ATK_	_LDNM[Oxidation]ATK_	LDNMATK	-57.2576	16129633 GI:16129633	TRUE	_LDNM[Oxidation]ATK_	404.697	NH3	5	y	1	563.249	14.609	TRUE	gi	16129633 GI:16129633	16129633 GI:16129633	ASAP:ABE-0005603|UniProtKB/Swiss-Prot:P69776|EcoGene:EG10544|GeneID:946175|						GCF_000005845.2_ASM584v2_genomic_29-OCT-2014 _iRT	>gi|16129633 GI:16129633|ASAP:ABE-0005603|UniProtKB/Swiss-Prot:P69776|EcoGene:EG10544|GeneID:946175|
2	_LDNM[+16]ATK_	_LDNM[Oxidation]ATK_	LDNMATK	-57.2576	16129633 GI:16129633	TRUE	_LDNM[Oxidation]ATK_	404.697	noloss	5	y	1	580.276	40.2904	FALSE	gi	16129633 GI:16129633	16129633 GI:16129633	ASAP:ABE-0005603|UniProtKB/Swiss-Prot:P69776|EcoGene:EG10544|GeneID:946175|						GCF_000005845.2_ASM584v2_genomic_29-OCT-2014 _iRT	>gi|16129633 GI:16129633|ASAP:ABE-0005603|UniProtKB/Swiss-Prot:P69776|EcoGene:EG10544|GeneID:946175|
2	_LDNM[+16]ATK_	_LDNM[Oxidation]ATK_	LDNMATK	-57.2576	16129633 GI:16129633	TRUE	_LDNM[Oxidation]ATK_	404.697	1(+C+H4+O+S)	6	y	1	631.305	100	FALSE	gi	16129633 GI:16129633	16129633 GI:16129633	ASAP:ABE-0005603|UniProtKB/Swiss-Prot:P69776|EcoGene:EG10544|GeneID:946175|						GCF_000005845.2_ASM584v2_genomic_29-OCT-2014 _iRT	>gi|16129633 GI:16129633|ASAP:ABE-0005603|UniProtKB/Swiss-Prot:P69776|EcoGene:EG10544|GeneID:946175|
2	_LDNM[+16]ATK_	_LDNM[Oxidation]ATK_	LDNMATK	-57.2576	16129633 GI:16129633	TRUE	_LDNM[Oxidation]ATK_	404.697	NH3	6	y	1	678.276	21.5399	FALSE	gi	16129633 GI:16129633	16129633 GI:16129633	ASAP:ABE-0005603|UniProtKB/Swiss-Prot:P69776|EcoGene:EG10544|GeneID:946175|						GCF_000005845.2_ASM584v2_genomic_29-OCT-2014 _iRT	>gi|16129633 GI:16129633|ASAP:ABE-0005603|UniProtKB/Swiss-Prot:P69776|EcoGene:EG10544|GeneID:946175|
2	_LDNM[+16]ATK_	_LDNM[Oxidation]ATK_	LDNMATK	-57.2576	16129633 GI:16129633	TRUE	_LDNM[Oxidation]ATK_	404.697	noloss	6	y	1	695.303	89.558	FALSE	gi	16129633 GI:16129633	16129633 GI:16129633	ASAP:ABE-0005603|UniProtKB/Swiss-Prot:P69776|EcoGene:EG10544|GeneID:946175|						GCF_000005845.2_ASM584v2_genomic_29-OCT-2014 _iRT	>gi|16129633 GI:16129633|ASAP:ABE-0005603|UniProtKB/Swiss-Prot:P69776|EcoGene:EG10544|GeneID:946175|
2	_LDNM[+16]ATK_	_LDNM[Oxidation]ATK_	LDNMATK	-57.2576	16129633 GI:16129633	TRUE	_LDNM[Oxidation]ATK_	404.697	H2O	6	y	1	677.292	8.69963	TRUE	gi	16129633 GI:16129633	16129633 GI:16129633	ASAP:ABE-0005603|UniProtKB/Swiss-Prot:P69776|EcoGene:EG10544|GeneID:946175|						GCF_000005845.2_ASM584v2_genomic_29-OCT-2014 _iRT	>gi|16129633 GI:16129633|ASAP:ABE-0005603|UniProtKB/Swiss-Prot:P69776|EcoGene:EG10544|GeneID:946175|
2	_VHGGILGR_	_VHGGILGR_	VHGGILGR	-25.1834	16131836 GI:16131836	TRUE	_VHGGILGR_	404.743	NH3	3	y	1	328.198	7.16038	FALSE	gi	16131836 GI:16131836	16131836 GI:16131836	ASAP:ABE-0013097|UniProtKB/Swiss-Prot:P15639|EcoGene:EG10795|GeneID:948503|						GCF_000005845.2_ASM584v2_genomic_29-OCT-2014 _iRT	>gi|16131836 GI:16131836|ASAP:ABE-0013097|UniProtKB/Swiss-Prot:P15639|EcoGene:EG10795|GeneID:948503|
2	_VHGGILGR_	_VHGGILGR_	VHGGILGR	-25.1834	16131836 GI:16131836	TRUE	_VHGGILGR_	404.743	noloss	3	y	1	345.224	5.63563	FALSE	gi	16131836 GI:16131836	16131836 GI:16131836	ASAP:ABE-0013097|UniProtKB/Swiss-Prot:P15639|EcoGene:EG10795|GeneID:948503|						GCF_000005845.2_ASM584v2_genomic_29-OCT-2014 _iRT	>gi|16131836 GI:16131836|ASAP:ABE-0013097|UniProtKB/Swiss-Prot:P15639|EcoGene:EG10795|GeneID:948503|
2	_VHGGILGR_	_VHGGILGR_	VHGGILGR	-25.1834	16131836 GI:16131836	TRUE	_VHGGILGR_	404.743	noloss	7	y	2	355.209	54.6395	FALSE	gi	16131836 GI:16131836	16131836 GI:16131836	ASAP:ABE-0013097|UniProtKB/Swiss-Prot:P15639|EcoGene:EG10795|GeneID:948503|						GCF_000005845.2_ASM584v2_genomic_29-OCT-2014 _iRT	>gi|16131836 GI:16131836|ASAP:ABE-0013097|UniProtKB/Swiss-Prot:P15639|EcoGene:EG10795|GeneID:948503|
2	_VHGGILGR_	_VHGGILGR_	VHGGILGR	-25.1834	16131836 GI:16131836	TRUE	_VHGGILGR_	404.743	noloss	5	y	1	515.33	14.5245	FALSE	gi	16131836 GI:16131836	16131836 GI:16131836	ASAP:ABE-0013097|UniProtKB/Swiss-Prot:P15639|EcoGene:EG10795|GeneID:948503|						GCF_000005845.2_ASM584v2_genomic_29-OCT-2014 _iRT	>gi|16131836 GI:16131836|ASAP:ABE-0013097|UniProtKB/Swiss-Prot:P15639|EcoGene:EG10795|GeneID:948503|
2	_VHGGILGR_	_VHGGILGR_	VHGGILGR	-25.1834	16131836 GI:16131836	TRUE	_VHGGILGR_	404.743	noloss	6	y	1	572.351	100	FALSE	gi	16131836 GI:16131836	16131836 GI:16131836	ASAP:ABE-0013097|UniProtKB/Swiss-Prot:P15639|EcoGene:EG10795|GeneID:948503|						GCF_000005845.2_ASM584v2_genomic_29-OCT-2014 _iRT	>gi|16131836 GI:16131836|ASAP:ABE-0013097|UniProtKB/Swiss-Prot:P15639|EcoGene:EG10795|GeneID:948503|
3	_ENLEALLVALK_	_ENLEALLVALK_	ENLEALLVALK	98.2946	16131814 GI:16131814	TRUE	_ENLEALLVALK_	404.911	noloss	3	y	1	331.234	92.3293	FALSE	gi	16131814 GI:16131814	16131814 GI:16131814	ASAP:ABE-0013031|UniProtKB/Swiss-Prot:P0A7L0|EcoGene:EG10864|GeneID:948483|						GCF_000005845.2_ASM584v2_genomic_29-OCT-2014 _iRT	>gi|16131814 GI:16131814|ASAP:ABE-0013031|UniProtKB/Swiss-Prot:P0A7L0|EcoGene:EG10864|GeneID:948483|
3	_ENLEALLVALK_	_ENLEALLVALK_	ENLEALLVALK	98.2946	16131814 GI:16131814	TRUE	_ENLEALLVALK_	404.911	H2O	3	b	1	339.166	40.3327	FALSE	gi	16131814 GI:16131814	16131814 GI:16131814	ASAP:ABE-0013031|UniProtKB/Swiss-Prot:P0A7L0|EcoGene:EG10864|GeneID:948483|						GCF_000005845.2_ASM584v2_genomic_29-OCT-2014 _iRT	>gi|16131814 GI:16131814|ASAP:ABE-0013031|UniProtKB/Swiss-Prot:P0A7L0|EcoGene:EG10864|GeneID:948483|
3	_ENLEALLVALK_	_ENLEALLVALK_	ENLEALLVALK	98.2946	16131814 GI:16131814	TRUE	_ENLEALLVALK_	404.911	noloss	3	b	1	357.177	27.3978	FALSE	gi	16131814 GI:16131814	16131814 GI:16131814	ASAP:ABE-0013031|UniProtKB/Swiss-Prot:P0A7L0|EcoGene:EG10864|GeneID:948483|						GCF_000005845.2_ASM584v2_genomic_29-OCT-2014 _iRT	>gi|16131814 GI:16131814|ASAP:ABE-0013031|UniProtKB/Swiss-Prot:P0A7L0|EcoGene:EG10864|GeneID:948483|
3	_ENLEALLVALK_	_ENLEALLVALK_	ENLEALLVALK	98.2946	16131814 GI:16131814	TRUE	_ENLEALLVALK_	404.911	noloss	4	y	1	430.302	100	FALSE	gi	16131814 GI:16131814	16131814 GI:16131814	ASAP:ABE-0013031|UniProtKB/Swiss-Prot:P0A7L0|EcoGene:EG10864|GeneID:948483|						GCF_000005845.2_ASM584v2_genomic_29-OCT-2014 _iRT	>gi|16131814 GI:16131814|ASAP:ABE-0013031|UniProtKB/Swiss-Prot:P0A7L0|EcoGene:EG10864|GeneID:948483|
3	_ENLEALLVALK_	_ENLEALLVALK_	ENLEALLVALK	98.2946	16131814 GI:16131814	TRUE	_ENLEALLVALK_	404.911	H2O	4	b	1	468.209	21.4045	FALSE	gi	16131814 GI:16131814	16131814 GI:16131814	ASAP:ABE-0013031|UniProtKB/Swiss-Prot:P0A7L0|EcoGene:EG10864|GeneID:948483|						GCF_000005845.2_ASM584v2_genomic_29-OCT-2014 _iRT	>gi|16131814 GI:16131814|ASAP:ABE-0013031|UniProtKB/Swiss-Prot:P0A7L0|EcoGene:EG10864|GeneID:948483|
3	_ENLEALLVALK_	_ENLEALLVALK_	ENLEALLVALK	98.2946	16131814 GI:16131814	TRUE	_ENLEALLVALK_	404.911	H2O	5	b	1	539.246	13.145	TRUE	gi	16131814 GI:16131814	16131814 GI:16131814	ASAP:ABE-0013031|UniProtKB/Swiss-Prot:P0A7L0|EcoGene:EG10864|GeneID:948483|						GCF_000005845.2_ASM584v2_genomic_29-OCT-2014 _iRT	>gi|16131814 GI:16131814|ASAP:ABE-0013031|UniProtKB/Swiss-Prot:P0A7L0|EcoGene:EG10864|GeneID:948483|
3	_ENLEALLVALK_	_ENLEALLVALK_	ENLEALLVALK	98.2946	16131814 GI:16131814	TRUE	_ENLEALLVALK_	404.911	NH3	5	b	1	540.23	11.7767	TRUE	gi	16131814 GI:16131814	16131814 GI:16131814	ASAP:ABE-0013031|UniProtKB/Swiss-Prot:P0A7L0|EcoGene:EG10864|GeneID:948483|						GCF_000005845.2_ASM584v2_genomic_29-OCT-2014 _iRT	>gi|16131814 GI:16131814|ASAP:ABE-0013031|UniProtKB/Swiss-Prot:P0A7L0|EcoGene:EG10864|GeneID:948483|
3	_ENLEALLVALK_	_ENLEALLVALK_	ENLEALLVALK	98.2946	16131814 GI:16131814	TRUE	_ENLEALLVALK_	404.911	noloss	5	y	1	543.386	57.1754	FALSE	gi	16131814 GI:16131814	16131814 GI:16131814	ASAP:ABE-0013031|UniProtKB/Swiss-Prot:P0A7L0|EcoGene:EG10864|GeneID:948483|						GCF_000005845.2_ASM584v2_genomic_29-OCT-2014 _iRT	>gi|16131814 GI:16131814|ASAP:ABE-0013031|UniProtKB/Swiss-Prot:P0A7L0|EcoGene:EG10864|GeneID:948483|
3	_ENLEALLVALK_	_ENLEALLVALK_	ENLEALLVALK	98.2946	16131814 GI:16131814	TRUE	_ENLEALLVALK_	404.911	noloss	5	b	1	557.257	18.3725	TRUE	gi	16131814 GI:16131814	16131814 GI:16131814	ASAP:ABE-0013031|UniProtKB/Swiss-Prot:P0A7L0|EcoGene:EG10864|GeneID:948483|						GCF_000005845.2_ASM584v2_genomic_29-OCT-2014 _iRT	>gi|16131814 GI:16131814|ASAP:ABE-0013031|UniProtKB/Swiss-Prot:P0A7L0|EcoGene:EG10864|GeneID:948483|
3	_VTAERDPANLK_	_VTAERDPANLK_	VTAERDPANLK	-25.2389	16129733 GI:16129733	TRUE	_VTAERDPANLK_	405.223	noloss	3	y	1	374.24	31.1124	FALSE	gi	16129733 GI:16129733	16129733 GI:16129733	ASAP:ABE-0005920|UniProtKB/Swiss-Prot:P0A9B2|EcoGene:EG10367|GeneID:947679|						GCF_000005845.2_ASM584v2_genomic_29-OCT-2014 _iRT	>gi|16129733 GI:16129733|ASAP:ABE-0005920|UniProtKB/Swiss-Prot:P0A9B2|EcoGene:EG10367|GeneID:947679|
3	_VTAERDPANLK_	_VTAERDPANLK_	VTAERDPANLK	-25.2389	16129733 GI:16129733	TRUE	_VTAERDPANLK_	405.223	NH3	4	b	1	384.177	7.42002	TRUE	gi	16129733 GI:16129733	16129733 GI:16129733	ASAP:ABE-0005920|UniProtKB/Swiss-Prot:P0A9B2|EcoGene:EG10367|GeneID:947679|						GCF_000005845.2_ASM584v2_genomic_29-OCT-2014 _iRT	>gi|16129733 GI:16129733|ASAP:ABE-0005920|UniProtKB/Swiss-Prot:P0A9B2|EcoGene:EG10367|GeneID:947679|
3	_VTAERDPANLK_	_VTAERDPANLK_	VTAERDPANLK	-25.2389	16129733 GI:16129733	TRUE	_VTAERDPANLK_	405.223	noloss	7	y	2	407.233	8.97841	TRUE	gi	16129733 GI:16129733	16129733 GI:16129733	ASAP:ABE-0005920|UniProtKB/Swiss-Prot:P0A9B2|EcoGene:EG10367|GeneID:947679|						GCF_000005845.2_ASM584v2_genomic_29-OCT-2014 _iRT	>gi|16129733 GI:16129733|ASAP:ABE-0005920|UniProtKB/Swiss-Prot:P0A9B2|EcoGene:EG10367|GeneID:947679|
3	_VTAERDPANLK_	_VTAERDPANLK_	VTAERDPANLK	-25.2389	16129733 GI:16129733	TRUE	_VTAERDPANLK_	405.223	noloss	4	y	1	445.277	12.5796	TRUE	gi	16129733 GI:16129733	16129733 GI:16129733	ASAP:ABE-0005920|UniProtKB/Swiss-Prot:P0A9B2|EcoGene:EG10367|GeneID:947679|						GCF_000005845.2_ASM584v2_genomic_29-OCT-2014 _iRT	>gi|16129733 GI:16129733|ASAP:ABE-0005920|UniProtKB/Swiss-Prot:P0A9B2|EcoGene:EG10367|GeneID:947679|
3	_VTAERDPANLK_	_VTAERDPANLK_	VTAERDPANLK	-25.2389	16129733 GI:16129733	TRUE	_VTAERDPANLK_	405.223	noloss	8	y	2	471.754	6.61667	TRUE	gi	16129733 GI:16129733	16129733 GI:16129733	ASAP:ABE-0005920|UniProtKB/Swiss-Prot:P0A9B2|EcoGene:EG10367|GeneID:947679|						GCF_000005845.2_ASM584v2_genomic_29-OCT-2014 _iRT	>gi|16129733 GI:16129733|ASAP:ABE-0005920|UniProtKB/Swiss-Prot:P0A9B2|EcoGene:EG10367|GeneID:947679|
3	_VTAERDPANLK_	_VTAERDPANLK_	VTAERDPANLK	-25.2389	16129733 GI:16129733	TRUE	_VTAERDPANLK_	405.223	NH3	9	y	2	498.759	7.25727	TRUE	gi	16129733 GI:16129733	16129733 GI:16129733	ASAP:ABE-0005920|UniProtKB/Swiss-Prot:P0A9B2|EcoGene:EG10367|GeneID:947679|						GCF_000005845.2_ASM584v2_genomic_29-OCT-2014 _iRT	>gi|16129733 GI:16129733|ASAP:ABE-0005920|UniProtKB/Swiss-Prot:P0A9B2|EcoGene:EG10367|GeneID:947679|
3	_VTAERDPANLK_	_VTAERDPANLK_	VTAERDPANLK	-25.2389	16129733 GI:16129733	TRUE	_VTAERDPANLK_	405.223	noloss	9	y	2	507.272	63.8511	FALSE	gi	16129733 GI:16129733	16129733 GI:16129733	ASAP:ABE-0005920|UniProtKB/Swiss-Prot:P0A9B2|EcoGene:EG10367|GeneID:947679|						GCF_000005845.2_ASM584v2_genomic_29-OCT-2014 _iRT	>gi|16129733 GI:16129733|ASAP:ABE-0005920|UniProtKB/Swiss-Prot:P0A9B2|EcoGene:EG10367|GeneID:947679|
3	_VTAERDPANLK_	_VTAERDPANLK_	VTAERDPANLK	-25.2389	16129733 GI:16129733	TRUE	_VTAERDPANLK_	405.223	H2O	5	y	1	524.319	6.2933	TRUE	gi	16129733 GI:16129733	16129733 GI:16129733	ASAP:ABE-0005920|UniProtKB/Swiss-Prot:P0A9B2|EcoGene:EG10367|GeneID:947679|						GCF_000005845.2_ASM584v2_genomic_29-OCT-2014 _iRT	>gi|16129733 GI:16129733|ASAP:ABE-0005920|UniProtKB/Swiss-Prot:P0A9B2|EcoGene:EG10367|GeneID:947679|
3	_VTAERDPANLK_	_VTAERDPANLK_	VTAERDPANLK	-25.2389	16129733 GI:16129733	TRUE	_VTAERDPANLK_	405.223	NH3	5	y	1	525.303	8.85139	TRUE	gi	16129733 GI:16129733	16129733 GI:16129733	ASAP:ABE-0005920|UniProtKB/Swiss-Prot:P0A9B2|EcoGene:EG10367|GeneID:947679|						GCF_000005845.2_ASM584v2_genomic_29-OCT-2014 _iRT	>gi|16129733 GI:16129733|ASAP:ABE-0005920|UniProtKB/Swiss-Prot:P0A9B2|EcoGene:EG10367|GeneID:947679|
3	_VTAERDPANLK_	_VTAERDPANLK_	VTAERDPANLK	-25.2389	16129733 GI:16129733	TRUE	_VTAERDPANLK_	405.223	noloss	5	y	1	542.33	100	FALSE	gi	16129733 GI:16129733	16129733 GI:16129733	ASAP:ABE-0005920|UniProtKB/Swiss-Prot:P0A9B2|EcoGene:EG10367|GeneID:947679|						GCF_000005845.2_ASM584v2_genomic_29-OCT-2014 _iRT	>gi|16129733 GI:16129733|ASAP:ABE-0005920|UniProtKB/Swiss-Prot:P0A9B2|EcoGene:EG10367|GeneID:947679|
3	_VTAERDPANLK_	_VTAERDPANLK_	VTAERDPANLK	-25.2389	16129733 GI:16129733	TRUE	_VTAERDPANLK_	405.223	H2O	10	y	2	548.791	6.66282	TRUE	gi	16129733 GI:16129733	16129733 GI:16129733	ASAP:ABE-0005920|UniProtKB/Swiss-Prot:P0A9B2|EcoGene:EG10367|GeneID:947679|						GCF_000005845.2_ASM584v2_genomic_29-OCT-2014 _iRT	>gi|16129733 GI:16129733|ASAP:ABE-0005920|UniProtKB/Swiss-Prot:P0A9B2|EcoGene:EG10367|GeneID:947679|
3	_VTAERDPANLK_	_VTAERDPANLK_	VTAERDPANLK	-25.2389	16129733 GI:16129733	TRUE	_VTAERDPANLK_	405.223	NH3	10	y	2	549.283	7.44879	TRUE	gi	16129733 GI:16129733	16129733 GI:16129733	ASAP:ABE-0005920|UniProtKB/Swiss-Prot:P0A9B2|EcoGene:EG10367|GeneID:947679|						GCF_000005845.2_ASM584v2_genomic_29-OCT-2014 _iRT	>gi|16129733 GI:16129733|ASAP:ABE-0005920|UniProtKB/Swiss-Prot:P0A9B2|EcoGene:EG10367|GeneID:947679|
3	_VTAERDPANLK_	_VTAERDPANLK_	VTAERDPANLK	-25.2389	16129733 GI:16129733	TRUE	_VTAERDPANLK_	405.223	noloss	10	y	2	557.796	75.8173	FALSE	gi	16129733 GI:16129733	16129733 GI:16129733	ASAP:ABE-0005920|UniProtKB/Swiss-Prot:P0A9B2|EcoGene:EG10367|GeneID:947679|						GCF_000005845.2_ASM584v2_genomic_29-OCT-2014 _iRT	>gi|16129733 GI:16129733|ASAP:ABE-0005920|UniProtKB/Swiss-Prot:P0A9B2|EcoGene:EG10367|GeneID:947679|
3	_VTAERDPANLK_	_VTAERDPANLK_	VTAERDPANLK	-25.2389	16129733 GI:16129733	TRUE	_VTAERDPANLK_	405.223	H2O	6	y	1	639.346	7.43204	TRUE	gi	16129733 GI:16129733	16129733 GI:16129733	ASAP:ABE-0005920|UniProtKB/Swiss-Prot:P0A9B2|EcoGene:EG10367|GeneID:947679|						GCF_000005845.2_ASM584v2_genomic_29-OCT-2014 _iRT	>gi|16129733 GI:16129733|ASAP:ABE-0005920|UniProtKB/Swiss-Prot:P0A9B2|EcoGene:EG10367|GeneID:947679|
3	_VTAERDPANLK_	_VTAERDPANLK_	VTAERDPANLK	-25.2389	16129733 GI:16129733	TRUE	_VTAERDPANLK_	405.223	noloss	6	y	1	657.357	10.0329	TRUE	gi	16129733 GI:16129733	16129733 GI:16129733	ASAP:ABE-0005920|UniProtKB/Swiss-Prot:P0A9B2|EcoGene:EG10367|GeneID:947679|						GCF_000005845.2_ASM584v2_genomic_29-OCT-2014 _iRT	>gi|16129733 GI:16129733|ASAP:ABE-0005920|UniProtKB/Swiss-Prot:P0A9B2|EcoGene:EG10367|GeneID:947679|
3	_VTAERDPANLK_	_VTAERDPANLK_	VTAERDPANLK	-25.2389	16129733 GI:16129733	TRUE	_VTAERDPANLK_	405.223	H2O	7	b	1	751.373	9.38641	TRUE	gi	16129733 GI:16129733	16129733 GI:16129733	ASAP:ABE-0005920|UniProtKB/Swiss-Prot:P0A9B2|EcoGene:EG10367|GeneID:947679|						GCF_000005845.2_ASM584v2_genomic_29-OCT-2014 _iRT	>gi|16129733 GI:16129733|ASAP:ABE-0005920|UniProtKB/Swiss-Prot:P0A9B2|EcoGene:EG10367|GeneID:947679|
3	_VTAERDPANLK_	_VTAERDPANLK_	VTAERDPANLK	-25.2389	16129733 GI:16129733	TRUE	_VTAERDPANLK_	405.223	NH3	7	y	1	796.431	13.5271	TRUE	gi	16129733 GI:16129733	16129733 GI:16129733	ASAP:ABE-0005920|UniProtKB/Swiss-Prot:P0A9B2|EcoGene:EG10367|GeneID:947679|						GCF_000005845.2_ASM584v2_genomic_29-OCT-2014 _iRT	>gi|16129733 GI:16129733|ASAP:ABE-0005920|UniProtKB/Swiss-Prot:P0A9B2|EcoGene:EG10367|GeneID:947679|
3	_VTAERDPANLK_	_VTAERDPANLK_	VTAERDPANLK	-25.2389	16129733 GI:16129733	TRUE	_VTAERDPANLK_	405.223	noloss	7	y	1	813.458	7.50362	TRUE	gi	16129733 GI:16129733	16129733 GI:16129733	ASAP:ABE-0005920|UniProtKB/Swiss-Prot:P0A9B2|EcoGene:EG10367|GeneID:947679|						GCF_000005845.2_ASM584v2_genomic_29-OCT-2014 _iRT	>gi|16129733 GI:16129733|ASAP:ABE-0005920|UniProtKB/Swiss-Prot:P0A9B2|EcoGene:EG10367|GeneID:947679|
3	_VTAERDPANLK_	_VTAERDPANLK_	VTAERDPANLK	-25.2389	16129733 GI:16129733	TRUE	_VTAERDPANLK_	405.223	noloss	8	b	1	840.421	18.8887	FALSE	gi	16129733 GI:16129733	16129733 GI:16129733	ASAP:ABE-0005920|UniProtKB/Swiss-Prot:P0A9B2|EcoGene:EG10367|GeneID:947679|						GCF_000005845.2_ASM584v2_genomic_29-OCT-2014 _iRT	>gi|16129733 GI:16129733|ASAP:ABE-0005920|UniProtKB/Swiss-Prot:P0A9B2|EcoGene:EG10367|GeneID:947679|
3	_VTAERDPANLK_	_VTAERDPANLK_	VTAERDPANLK	-25.2389	16129733 GI:16129733	TRUE	_VTAERDPANLK_	405.223	H2O	8	y	1	924.49	6.04193	TRUE	gi	16129733 GI:16129733	16129733 GI:16129733	ASAP:ABE-0005920|UniProtKB/Swiss-Prot:P0A9B2|EcoGene:EG10367|GeneID:947679|						GCF_000005845.2_ASM584v2_genomic_29-OCT-2014 _iRT	>gi|16129733 GI:16129733|ASAP:ABE-0005920|UniProtKB/Swiss-Prot:P0A9B2|EcoGene:EG10367|GeneID:947679|
3	_VTAERDPANLK_	_VTAERDPANLK_	VTAERDPANLK	-25.2389	16129733 GI:16129733	TRUE	_VTAERDPANLK_	405.223	NH3	8	y	1	925.474	12.3633	TRUE	gi	16129733 GI:16129733	16129733 GI:16129733	ASAP:ABE-0005920|UniProtKB/Swiss-Prot:P0A9B2|EcoGene:EG10367|GeneID:947679|						GCF_000005845.2_ASM584v2_genomic_29-OCT-2014 _iRT	>gi|16129733 GI:16129733|ASAP:ABE-0005920|UniProtKB/Swiss-Prot:P0A9B2|EcoGene:EG10367|GeneID:947679|
3	_VTAERDPANLK_	_VTAERDPANLK_	VTAERDPANLK	-25.2389	16129733 GI:16129733	TRUE	_VTAERDPANLK_	405.223	noloss	8	y	1	942.5	15.6469	TRUE	gi	16129733 GI:16129733	16129733 GI:16129733	ASAP:ABE-0005920|UniProtKB/Swiss-Prot:P0A9B2|EcoGene:EG10367|GeneID:947679|						GCF_000005845.2_ASM584v2_genomic_29-OCT-2014 _iRT	>gi|16129733 GI:16129733|ASAP:ABE-0005920|UniProtKB/Swiss-Prot:P0A9B2|EcoGene:EG10367|GeneID:947679|
3	_VTAERDPANLK_	_VTAERDPANLK_	VTAERDPANLK	-25.2389	16129733 GI:16129733	TRUE	_VTAERDPANLK_	405.223	noloss	9	b	1	954.464	5.26724	TRUE	gi	16129733 GI:16129733	16129733 GI:16129733	ASAP:ABE-0005920|UniProtKB/Swiss-Prot:P0A9B2|EcoGene:EG10367|GeneID:947679|						GCF_000005845.2_ASM584v2_genomic_29-OCT-2014 _iRT	>gi|16129733 GI:16129733|ASAP:ABE-0005920|UniProtKB/Swiss-Prot:P0A9B2|EcoGene:EG10367|GeneID:947679|
3	_VTAERDPANLK_	_VTAERDPANLK_	VTAERDPANLK	-25.2389	16129733 GI:16129733	TRUE	_VTAERDPANLK_	405.223	noloss	9	y	1	1013.54	5.01677	TRUE	gi	16129733 GI:16129733	16129733 GI:16129733	ASAP:ABE-0005920|UniProtKB/Swiss-Prot:P0A9B2|EcoGene:EG10367|GeneID:947679|						GCF_000005845.2_ASM584v2_genomic_29-OCT-2014 _iRT	>gi|16129733 GI:16129733|ASAP:ABE-0005920|UniProtKB/Swiss-Prot:P0A9B2|EcoGene:EG10367|GeneID:947679|
3	_VTAERDPANLK_	_VTAERDPANLK_	VTAERDPANLK	-25.2389	16129733 GI:16129733	TRUE	_VTAERDPANLK_	405.223	H2O	8	y	2	462.749	6.00677	TRUE	gi	16129733 GI:16129733	16129733 GI:16129733	ASAP:ABE-0005920|UniProtKB/Swiss-Prot:P0A9B2|EcoGene:EG10367|GeneID:947679|						GCF_000005845.2_ASM584v2_genomic_29-OCT-2014 _iRT	>gi|16129733 GI:16129733|ASAP:ABE-0005920|UniProtKB/Swiss-Prot:P0A9B2|EcoGene:EG10367|GeneID:947679|
3	_VTAERDPANLK_	_VTAERDPANLK_	VTAERDPANLK	-25.2389	16129733 GI:16129733	TRUE	_VTAERDPANLK_	405.223	NH3	6	y	1	640.33	38.1706	FALSE	gi	16129733 GI:16129733	16129733 GI:16129733	ASAP:ABE-0005920|UniProtKB/Swiss-Prot:P0A9B2|EcoGene:EG10367|GeneID:947679|						GCF_000005845.2_ASM584v2_genomic_29-OCT-2014 _iRT	>gi|16129733 GI:16129733|ASAP:ABE-0005920|UniProtKB/Swiss-Prot:P0A9B2|EcoGene:EG10367|GeneID:947679|
2	_YVADLTK_	_YVADLTK_	YVADLTK	-9.56506	16129225 GI:16129225	TRUE	_YVADLTK_	405.224	H2O	3	y	1	343.234	5.57094	TRUE	gi	16129225 GI:16129225	16129225 GI:16129225	ASAP:ABE-0004244|UniProtKB/Swiss-Prot:P00895|EcoGene:EG11028|GeneID:945846|						GCF_000005845.2_ASM584v2_genomic_29-OCT-2014 _iRT	>gi|16129225 GI:16129225|ASAP:ABE-0004244|UniProtKB/Swiss-Prot:P00895|EcoGene:EG11028|GeneID:945846|
2	_YVADLTK_	_YVADLTK_	YVADLTK	-9.56506	16129225 GI:16129225	TRUE	_YVADLTK_	405.224	noloss	3	y	1	361.245	40.2631	FALSE	gi	16129225 GI:16129225	16129225 GI:16129225	ASAP:ABE-0004244|UniProtKB/Swiss-Prot:P00895|EcoGene:EG11028|GeneID:945846|						GCF_000005845.2_ASM584v2_genomic_29-OCT-2014 _iRT	>gi|16129225 GI:16129225|ASAP:ABE-0004244|UniProtKB/Swiss-Prot:P00895|EcoGene:EG11028|GeneID:945846|
2	_YVADLTK_	_YVADLTK_	YVADLTK	-9.56506	16129225 GI:16129225	TRUE	_YVADLTK_	405.224	H2O	4	y	1	458.261	5.97313	FALSE	gi	16129225 GI:16129225	16129225 GI:16129225	ASAP:ABE-0004244|UniProtKB/Swiss-Prot:P00895|EcoGene:EG11028|GeneID:945846|						GCF_000005845.2_ASM584v2_genomic_29-OCT-2014 _iRT	>gi|16129225 GI:16129225|ASAP:ABE-0004244|UniProtKB/Swiss-Prot:P00895|EcoGene:EG11028|GeneID:945846|
2	_YVADLTK_	_YVADLTK_	YVADLTK	-9.56506	16129225 GI:16129225	TRUE	_YVADLTK_	405.224	H2O	5	y	1	529.298	7.43599	FALSE	gi	16129225 GI:16129225	16129225 GI:16129225	ASAP:ABE-0004244|UniProtKB/Swiss-Prot:P00895|EcoGene:EG11028|GeneID:945846|						GCF_000005845.2_ASM584v2_genomic_29-OCT-2014 _iRT	>gi|16129225 GI:16129225|ASAP:ABE-0004244|UniProtKB/Swiss-Prot:P00895|EcoGene:EG11028|GeneID:945846|
2	_YVADLTK_	_YVADLTK_	YVADLTK	-9.56506	16129225 GI:16129225	TRUE	_YVADLTK_	405.224	noloss	5	y	1	547.309	100	FALSE	gi	16129225 GI:16129225	16129225 GI:16129225	ASAP:ABE-0004244|UniProtKB/Swiss-Prot:P00895|EcoGene:EG11028|GeneID:945846|						GCF_000005845.2_ASM584v2_genomic_29-OCT-2014 _iRT	>gi|16129225 GI:16129225|ASAP:ABE-0004244|UniProtKB/Swiss-Prot:P00895|EcoGene:EG11028|GeneID:945846|
2	_YVADLTK_	_YVADLTK_	YVADLTK	-9.56506	16129225 GI:16129225	TRUE	_YVADLTK_	405.224	noloss	6	y	1	646.377	39.4067	FALSE	gi	16129225 GI:16129225	16129225 GI:16129225	ASAP:ABE-0004244|UniProtKB/Swiss-Prot:P00895|EcoGene:EG11028|GeneID:945846|						GCF_000005845.2_ASM584v2_genomic_29-OCT-2014 _iRT	>gi|16129225 GI:16129225|ASAP:ABE-0004244|UniProtKB/Swiss-Prot:P00895|EcoGene:EG11028|GeneID:945846|
2	_YVADLTK_	_YVADLTK_	YVADLTK	-9.56506	16129225 GI:16129225	TRUE	_YVADLTK_	405.224	noloss	4	y	1	476.271	5.83845	FALSE	gi	16129225 GI:16129225	16129225 GI:16129225	ASAP:ABE-0004244|UniProtKB/Swiss-Prot:P00895|EcoGene:EG11028|GeneID:945846|						GCF_000005845.2_ASM584v2_genomic_29-OCT-2014 _iRT	>gi|16129225 GI:16129225|ASAP:ABE-0004244|UniProtKB/Swiss-Prot:P00895|EcoGene:EG11028|GeneID:945846|
3	_GDVHYVQIGAR_	_GDVHYVQIGAR_	GDVHYVQIGAR	1.81276	90111568 GI:90111568	TRUE	_GDVHYVQIGAR_	405.547	noloss	3	y	1	303.178	100	FALSE	gi	90111568 GI:90111568	90111568 GI:90111568	ASAP:ABE-0010759|UniProtKB/Swiss-Prot:P0A9W9|EcoGene:EG12838|GeneID:947775|						GCF_000005845.2_ASM584v2_genomic_29-OCT-2014 _iRT	>gi|90111568 GI:90111568|ASAP:ABE-0010759|UniProtKB/Swiss-Prot:P0A9W9|EcoGene:EG12838|GeneID:947775|
3	_GDVHYVQIGAR_	_GDVHYVQIGAR_	GDVHYVQIGAR	1.81276	90111568 GI:90111568	TRUE	_GDVHYVQIGAR_	405.547	NH3	4	y	1	399.235	5.40154	TRUE	gi	90111568 GI:90111568	90111568 GI:90111568	ASAP:ABE-0010759|UniProtKB/Swiss-Prot:P0A9W9|EcoGene:EG12838|GeneID:947775|						GCF_000005845.2_ASM584v2_genomic_29-OCT-2014 _iRT	>gi|90111568 GI:90111568|ASAP:ABE-0010759|UniProtKB/Swiss-Prot:P0A9W9|EcoGene:EG12838|GeneID:947775|
3	_GDVHYVQIGAR_	_GDVHYVQIGAR_	GDVHYVQIGAR	1.81276	90111568 GI:90111568	TRUE	_GDVHYVQIGAR_	405.547	noloss	7	b	2	400.19	13.5587	TRUE	gi	90111568 GI:90111568	90111568 GI:90111568	ASAP:ABE-0010759|UniProtKB/Swiss-Prot:P0A9W9|EcoGene:EG12838|GeneID:947775|						GCF_000005845.2_ASM584v2_genomic_29-OCT-2014 _iRT	>gi|90111568 GI:90111568|ASAP:ABE-0010759|UniProtKB/Swiss-Prot:P0A9W9|EcoGene:EG12838|GeneID:947775|
3	_GDVHYVQIGAR_	_GDVHYVQIGAR_	GDVHYVQIGAR	1.81276	90111568 GI:90111568	TRUE	_GDVHYVQIGAR_	405.547	noloss	4	b	1	409.183	23.7416	FALSE	gi	90111568 GI:90111568	90111568 GI:90111568	ASAP:ABE-0010759|UniProtKB/Swiss-Prot:P0A9W9|EcoGene:EG12838|GeneID:947775|						GCF_000005845.2_ASM584v2_genomic_29-OCT-2014 _iRT	>gi|90111568 GI:90111568|ASAP:ABE-0010759|UniProtKB/Swiss-Prot:P0A9W9|EcoGene:EG12838|GeneID:947775|
3	_GDVHYVQIGAR_	_GDVHYVQIGAR_	GDVHYVQIGAR	1.81276	90111568 GI:90111568	TRUE	_GDVHYVQIGAR_	405.547	noloss	4	y	1	416.262	55.036	FALSE	gi	90111568 GI:90111568	90111568 GI:90111568	ASAP:ABE-0010759|UniProtKB/Swiss-Prot:P0A9W9|EcoGene:EG12838|GeneID:947775|						GCF_000005845.2_ASM584v2_genomic_29-OCT-2014 _iRT	>gi|90111568 GI:90111568|ASAP:ABE-0010759|UniProtKB/Swiss-Prot:P0A9W9|EcoGene:EG12838|GeneID:947775|
3	_GDVHYVQIGAR_	_GDVHYVQIGAR_	GDVHYVQIGAR	1.81276	90111568 GI:90111568	TRUE	_GDVHYVQIGAR_	405.547	NH3	8	y	2	463.746	5.77751	TRUE	gi	90111568 GI:90111568	90111568 GI:90111568	ASAP:ABE-0010759|UniProtKB/Swiss-Prot:P0A9W9|EcoGene:EG12838|GeneID:947775|						GCF_000005845.2_ASM584v2_genomic_29-OCT-2014 _iRT	>gi|90111568 GI:90111568|ASAP:ABE-0010759|UniProtKB/Swiss-Prot:P0A9W9|EcoGene:EG12838|GeneID:947775|
3	_GDVHYVQIGAR_	_GDVHYVQIGAR_	GDVHYVQIGAR	1.81276	90111568 GI:90111568	TRUE	_GDVHYVQIGAR_	405.547	H2O	9	b	2	476.238	7.37265	TRUE	gi	90111568 GI:90111568	90111568 GI:90111568	ASAP:ABE-0010759|UniProtKB/Swiss-Prot:P0A9W9|EcoGene:EG12838|GeneID:947775|						GCF_000005845.2_ASM584v2_genomic_29-OCT-2014 _iRT	>gi|90111568 GI:90111568|ASAP:ABE-0010759|UniProtKB/Swiss-Prot:P0A9W9|EcoGene:EG12838|GeneID:947775|
3	_GDVHYVQIGAR_	_GDVHYVQIGAR_	GDVHYVQIGAR	1.81276	90111568 GI:90111568	TRUE	_GDVHYVQIGAR_	405.547	NH3	5	y	1	527.294	33.6783	FALSE	gi	90111568 GI:90111568	90111568 GI:90111568	ASAP:ABE-0010759|UniProtKB/Swiss-Prot:P0A9W9|EcoGene:EG12838|GeneID:947775|						GCF_000005845.2_ASM584v2_genomic_29-OCT-2014 _iRT	>gi|90111568 GI:90111568|ASAP:ABE-0010759|UniProtKB/Swiss-Prot:P0A9W9|EcoGene:EG12838|GeneID:947775|
3	_GDVHYVQIGAR_	_GDVHYVQIGAR_	GDVHYVQIGAR	1.81276	90111568 GI:90111568	TRUE	_GDVHYVQIGAR_	405.547	noloss	5	y	1	544.32	7.50378	TRUE	gi	90111568 GI:90111568	90111568 GI:90111568	ASAP:ABE-0010759|UniProtKB/Swiss-Prot:P0A9W9|EcoGene:EG12838|GeneID:947775|						GCF_000005845.2_ASM584v2_genomic_29-OCT-2014 _iRT	>gi|90111568 GI:90111568|ASAP:ABE-0010759|UniProtKB/Swiss-Prot:P0A9W9|EcoGene:EG12838|GeneID:947775|
3	_GDVHYVQIGAR_	_GDVHYVQIGAR_	GDVHYVQIGAR	1.81276	90111568 GI:90111568	TRUE	_GDVHYVQIGAR_	405.547	noloss	5	b	1	572.246	33.3199	FALSE	gi	90111568 GI:90111568	90111568 GI:90111568	ASAP:ABE-0010759|UniProtKB/Swiss-Prot:P0A9W9|EcoGene:EG12838|GeneID:947775|						GCF_000005845.2_ASM584v2_genomic_29-OCT-2014 _iRT	>gi|90111568 GI:90111568|ASAP:ABE-0010759|UniProtKB/Swiss-Prot:P0A9W9|EcoGene:EG12838|GeneID:947775|
3	_GDVHYVQIGAR_	_GDVHYVQIGAR_	GDVHYVQIGAR	1.81276	90111568 GI:90111568	TRUE	_GDVHYVQIGAR_	405.547	noloss	6	b	1	671.315	18.2372	FALSE	gi	90111568 GI:90111568	90111568 GI:90111568	ASAP:ABE-0010759|UniProtKB/Swiss-Prot:P0A9W9|EcoGene:EG12838|GeneID:947775|						GCF_000005845.2_ASM584v2_genomic_29-OCT-2014 _iRT	>gi|90111568 GI:90111568|ASAP:ABE-0010759|UniProtKB/Swiss-Prot:P0A9W9|EcoGene:EG12838|GeneID:947775|
3	_GDVHYVQIGAR_	_GDVHYVQIGAR_	GDVHYVQIGAR	1.81276	90111568 GI:90111568	TRUE	_GDVHYVQIGAR_	405.547	NH3	7	y	1	789.425	13.516	TRUE	gi	90111568 GI:90111568	90111568 GI:90111568	ASAP:ABE-0010759|UniProtKB/Swiss-Prot:P0A9W9|EcoGene:EG12838|GeneID:947775|						GCF_000005845.2_ASM584v2_genomic_29-OCT-2014 _iRT	>gi|90111568 GI:90111568|ASAP:ABE-0010759|UniProtKB/Swiss-Prot:P0A9W9|EcoGene:EG12838|GeneID:947775|
3	_GDVHYVQIGAR_	_GDVHYVQIGAR_	GDVHYVQIGAR	1.81276	90111568 GI:90111568	TRUE	_GDVHYVQIGAR_	405.547	noloss	7	b	1	799.373	5.47896	TRUE	gi	90111568 GI:90111568	90111568 GI:90111568	ASAP:ABE-0010759|UniProtKB/Swiss-Prot:P0A9W9|EcoGene:EG12838|GeneID:947775|						GCF_000005845.2_ASM584v2_genomic_29-OCT-2014 _iRT	>gi|90111568 GI:90111568|ASAP:ABE-0010759|UniProtKB/Swiss-Prot:P0A9W9|EcoGene:EG12838|GeneID:947775|
3	_GDVHYVQIGAR_	_GDVHYVQIGAR_	GDVHYVQIGAR	1.81276	90111568 GI:90111568	TRUE	_GDVHYVQIGAR_	405.547	noloss	7	y	1	806.452	5.49407	TRUE	gi	90111568 GI:90111568	90111568 GI:90111568	ASAP:ABE-0010759|UniProtKB/Swiss-Prot:P0A9W9|EcoGene:EG12838|GeneID:947775|						GCF_000005845.2_ASM584v2_genomic_29-OCT-2014 _iRT	>gi|90111568 GI:90111568|ASAP:ABE-0010759|UniProtKB/Swiss-Prot:P0A9W9|EcoGene:EG12838|GeneID:947775|
3	_AAHSFNLLDAR_	_AAHSFNLLDAR_	AAHSFNLLDAR	26.2933	16131431 GI:16131431	TRUE	_AAHSFNLLDAR_	405.547	NH3	3	y	1	344.156	7.47374	TRUE	gi	16131431 GI:16131431	16131431 GI:16131431	ASAP:ABE-0011626|UniProtKB/Swiss-Prot:P00960|EcoGene:EG10409|GeneID:948079|						GCF_000005845.2_ASM584v2_genomic_29-OCT-2014 _iRT	>gi|16131431 GI:16131431|ASAP:ABE-0011626|UniProtKB/Swiss-Prot:P00960|EcoGene:EG10409|GeneID:948079|
3	_AAHSFNLLDAR_	_AAHSFNLLDAR_	AAHSFNLLDAR	26.2933	16131431 GI:16131431	TRUE	_AAHSFNLLDAR_	405.547	noloss	3	y	1	361.183	100	FALSE	gi	16131431 GI:16131431	16131431 GI:16131431	ASAP:ABE-0011626|UniProtKB/Swiss-Prot:P00960|EcoGene:EG10409|GeneID:948079|						GCF_000005845.2_ASM584v2_genomic_29-OCT-2014 _iRT	>gi|16131431 GI:16131431|ASAP:ABE-0011626|UniProtKB/Swiss-Prot:P00960|EcoGene:EG10409|GeneID:948079|
3	_AAHSFNLLDAR_	_AAHSFNLLDAR_	AAHSFNLLDAR	26.2933	16131431 GI:16131431	TRUE	_AAHSFNLLDAR_	405.547	H2O	7	b	2	362.182	18.6841	FALSE	gi	16131431 GI:16131431	16131431 GI:16131431	ASAP:ABE-0011626|UniProtKB/Swiss-Prot:P00960|EcoGene:EG10409|GeneID:948079|						GCF_000005845.2_ASM584v2_genomic_29-OCT-2014 _iRT	>gi|16131431 GI:16131431|ASAP:ABE-0011626|UniProtKB/Swiss-Prot:P00960|EcoGene:EG10409|GeneID:948079|
3	_AAHSFNLLDAR_	_AAHSFNLLDAR_	AAHSFNLLDAR	26.2933	16131431 GI:16131431	TRUE	_AAHSFNLLDAR_	405.547	noloss	4	b	1	367.172	14.4486	FALSE	gi	16131431 GI:16131431	16131431 GI:16131431	ASAP:ABE-0011626|UniProtKB/Swiss-Prot:P00960|EcoGene:EG10409|GeneID:948079|						GCF_000005845.2_ASM584v2_genomic_29-OCT-2014 _iRT	>gi|16131431 GI:16131431|ASAP:ABE-0011626|UniProtKB/Swiss-Prot:P00960|EcoGene:EG10409|GeneID:948079|
3	_AAHSFNLLDAR_	_AAHSFNLLDAR_	AAHSFNLLDAR	26.2933	16131431 GI:16131431	TRUE	_AAHSFNLLDAR_	405.547	noloss	4	y	1	474.267	43.2768	FALSE	gi	16131431 GI:16131431	16131431 GI:16131431	ASAP:ABE-0011626|UniProtKB/Swiss-Prot:P00960|EcoGene:EG10409|GeneID:948079|						GCF_000005845.2_ASM584v2_genomic_29-OCT-2014 _iRT	>gi|16131431 GI:16131431|ASAP:ABE-0011626|UniProtKB/Swiss-Prot:P00960|EcoGene:EG10409|GeneID:948079|
3	_AAHSFNLLDAR_	_AAHSFNLLDAR_	AAHSFNLLDAR	26.2933	16131431 GI:16131431	TRUE	_AAHSFNLLDAR_	405.547	H2O	5	b	1	496.23	11.3746	TRUE	gi	16131431 GI:16131431	16131431 GI:16131431	ASAP:ABE-0011626|UniProtKB/Swiss-Prot:P00960|EcoGene:EG10409|GeneID:948079|						GCF_000005845.2_ASM584v2_genomic_29-OCT-2014 _iRT	>gi|16131431 GI:16131431|ASAP:ABE-0011626|UniProtKB/Swiss-Prot:P00960|EcoGene:EG10409|GeneID:948079|
3	_AAHSFNLLDAR_	_AAHSFNLLDAR_	AAHSFNLLDAR	26.2933	16131431 GI:16131431	TRUE	_AAHSFNLLDAR_	405.547	noloss	5	b	1	514.241	9.75081	TRUE	gi	16131431 GI:16131431	16131431 GI:16131431	ASAP:ABE-0011626|UniProtKB/Swiss-Prot:P00960|EcoGene:EG10409|GeneID:948079|						GCF_000005845.2_ASM584v2_genomic_29-OCT-2014 _iRT	>gi|16131431 GI:16131431|ASAP:ABE-0011626|UniProtKB/Swiss-Prot:P00960|EcoGene:EG10409|GeneID:948079|
3	_AAHSFNLLDAR_	_AAHSFNLLDAR_	AAHSFNLLDAR	26.2933	16131431 GI:16131431	TRUE	_AAHSFNLLDAR_	405.547	noloss	5	y	1	587.351	8.4513	TRUE	gi	16131431 GI:16131431	16131431 GI:16131431	ASAP:ABE-0011626|UniProtKB/Swiss-Prot:P00960|EcoGene:EG10409|GeneID:948079|						GCF_000005845.2_ASM584v2_genomic_29-OCT-2014 _iRT	>gi|16131431 GI:16131431|ASAP:ABE-0011626|UniProtKB/Swiss-Prot:P00960|EcoGene:EG10409|GeneID:948079|
3	_AAHSFNLLDAR_	_AAHSFNLLDAR_	AAHSFNLLDAR	26.2933	16131431 GI:16131431	TRUE	_AAHSFNLLDAR_	405.547	H2O	6	b	1	610.273	7.3361	TRUE	gi	16131431 GI:16131431	16131431 GI:16131431	ASAP:ABE-0011626|UniProtKB/Swiss-Prot:P00960|EcoGene:EG10409|GeneID:948079|						GCF_000005845.2_ASM584v2_genomic_29-OCT-2014 _iRT	>gi|16131431 GI:16131431|ASAP:ABE-0011626|UniProtKB/Swiss-Prot:P00960|EcoGene:EG10409|GeneID:948079|
3	_AAHSFNLLDAR_	_AAHSFNLLDAR_	AAHSFNLLDAR	26.2933	16131431 GI:16131431	TRUE	_AAHSFNLLDAR_	405.547	NH3	6	b	1	611.257	7.05702	TRUE	gi	16131431 GI:16131431	16131431 GI:16131431	ASAP:ABE-0011626|UniProtKB/Swiss-Prot:P00960|EcoGene:EG10409|GeneID:948079|						GCF_000005845.2_ASM584v2_genomic_29-OCT-2014 _iRT	>gi|16131431 GI:16131431|ASAP:ABE-0011626|UniProtKB/Swiss-Prot:P00960|EcoGene:EG10409|GeneID:948079|
3	_AAHSFNLLDAR_	_AAHSFNLLDAR_	AAHSFNLLDAR	26.2933	16131431 GI:16131431	TRUE	_AAHSFNLLDAR_	405.547	noloss	6	b	1	628.284	40.9453	FALSE	gi	16131431 GI:16131431	16131431 GI:16131431	ASAP:ABE-0011626|UniProtKB/Swiss-Prot:P00960|EcoGene:EG10409|GeneID:948079|						GCF_000005845.2_ASM584v2_genomic_29-OCT-2014 _iRT	>gi|16131431 GI:16131431|ASAP:ABE-0011626|UniProtKB/Swiss-Prot:P00960|EcoGene:EG10409|GeneID:948079|
3	_AAHSFNLLDAR_	_AAHSFNLLDAR_	AAHSFNLLDAR	26.2933	16131431 GI:16131431	TRUE	_AAHSFNLLDAR_	405.547	noloss	7	b	1	741.368	16.8992	FALSE	gi	16131431 GI:16131431	16131431 GI:16131431	ASAP:ABE-0011626|UniProtKB/Swiss-Prot:P00960|EcoGene:EG10409|GeneID:948079|						GCF_000005845.2_ASM584v2_genomic_29-OCT-2014 _iRT	>gi|16131431 GI:16131431|ASAP:ABE-0011626|UniProtKB/Swiss-Prot:P00960|EcoGene:EG10409|GeneID:948079|
3	_KASIPEGVWTK_	_KASIPEGVWTK_	KASIPEGVWTK	17.2439	16130251 GI:16130251	TRUE	_KASIPEGVWTK_	405.896	H2O	7	b	2	333.184	24.2187	FALSE	gi	16130251 GI:16130251	16130251 GI:16130251	ASAP:ABE-0007648|UniProtKB/Swiss-Prot:P0A9Q5|EcoGene:EG10217|GeneID:946796|						GCF_000005845.2_ASM584v2_genomic_29-OCT-2014 _iRT	>gi|16130251 GI:16130251|ASAP:ABE-0007648|UniProtKB/Swiss-Prot:P0A9Q5|EcoGene:EG10217|GeneID:946796|
3	_KASIPEGVWTK_	_KASIPEGVWTK_	KASIPEGVWTK	17.2439	16130251 GI:16130251	TRUE	_KASIPEGVWTK_	405.896	noloss	6	y	2	360.19	12.8008	TRUE	gi	16130251 GI:16130251	16130251 GI:16130251	ASAP:ABE-0007648|UniProtKB/Swiss-Prot:P0A9Q5|EcoGene:EG10217|GeneID:946796|						GCF_000005845.2_ASM584v2_genomic_29-OCT-2014 _iRT	>gi|16130251 GI:16130251|ASAP:ABE-0007648|UniProtKB/Swiss-Prot:P0A9Q5|EcoGene:EG10217|GeneID:946796|
3	_KASIPEGVWTK_	_KASIPEGVWTK_	KASIPEGVWTK	17.2439	16130251 GI:16130251	TRUE	_KASIPEGVWTK_	405.896	H2O	4	b	1	382.245	16.3014	TRUE	gi	16130251 GI:16130251	16130251 GI:16130251	ASAP:ABE-0007648|UniProtKB/Swiss-Prot:P0A9Q5|EcoGene:EG10217|GeneID:946796|						GCF_000005845.2_ASM584v2_genomic_29-OCT-2014 _iRT	>gi|16130251 GI:16130251|ASAP:ABE-0007648|UniProtKB/Swiss-Prot:P0A9Q5|EcoGene:EG10217|GeneID:946796|
3	_KASIPEGVWTK_	_KASIPEGVWTK_	KASIPEGVWTK	17.2439	16130251 GI:16130251	TRUE	_KASIPEGVWTK_	405.896	H2O	7	y	2	399.711	7.37443	TRUE	gi	16130251 GI:16130251	16130251 GI:16130251	ASAP:ABE-0007648|UniProtKB/Swiss-Prot:P0A9Q5|EcoGene:EG10217|GeneID:946796|						GCF_000005845.2_ASM584v2_genomic_29-OCT-2014 _iRT	>gi|16130251 GI:16130251|ASAP:ABE-0007648|UniProtKB/Swiss-Prot:P0A9Q5|EcoGene:EG10217|GeneID:946796|
3	_KASIPEGVWTK_	_KASIPEGVWTK_	KASIPEGVWTK	17.2439	16130251 GI:16130251	TRUE	_KASIPEGVWTK_	405.896	noloss	4	b	1	400.255	100	FALSE	gi	16130251 GI:16130251	16130251 GI:16130251	ASAP:ABE-0007648|UniProtKB/Swiss-Prot:P0A9Q5|EcoGene:EG10217|GeneID:946796|						GCF_000005845.2_ASM584v2_genomic_29-OCT-2014 _iRT	>gi|16130251 GI:16130251|ASAP:ABE-0007648|UniProtKB/Swiss-Prot:P0A9Q5|EcoGene:EG10217|GeneID:946796|
3	_KASIPEGVWTK_	_KASIPEGVWTK_	KASIPEGVWTK	17.2439	16130251 GI:16130251	TRUE	_KASIPEGVWTK_	405.896	noloss	7	y	2	408.716	12.337	TRUE	gi	16130251 GI:16130251	16130251 GI:16130251	ASAP:ABE-0007648|UniProtKB/Swiss-Prot:P0A9Q5|EcoGene:EG10217|GeneID:946796|						GCF_000005845.2_ASM584v2_genomic_29-OCT-2014 _iRT	>gi|16130251 GI:16130251|ASAP:ABE-0007648|UniProtKB/Swiss-Prot:P0A9Q5|EcoGene:EG10217|GeneID:946796|
3	_KASIPEGVWTK_	_KASIPEGVWTK_	KASIPEGVWTK	17.2439	16130251 GI:16130251	TRUE	_KASIPEGVWTK_	405.896	noloss	3	y	1	434.24	47.5268	FALSE	gi	16130251 GI:16130251	16130251 GI:16130251	ASAP:ABE-0007648|UniProtKB/Swiss-Prot:P0A9Q5|EcoGene:EG10217|GeneID:946796|						GCF_000005845.2_ASM584v2_genomic_29-OCT-2014 _iRT	>gi|16130251 GI:16130251|ASAP:ABE-0007648|UniProtKB/Swiss-Prot:P0A9Q5|EcoGene:EG10217|GeneID:946796|
3	_KASIPEGVWTK_	_KASIPEGVWTK_	KASIPEGVWTK	17.2439	16130251 GI:16130251	TRUE	_KASIPEGVWTK_	405.896	NH3	9	b	2	476.25	14.8046	TRUE	gi	16130251 GI:16130251	16130251 GI:16130251	ASAP:ABE-0007648|UniProtKB/Swiss-Prot:P0A9Q5|EcoGene:EG10217|GeneID:946796|						GCF_000005845.2_ASM584v2_genomic_29-OCT-2014 _iRT	>gi|16130251 GI:16130251|ASAP:ABE-0007648|UniProtKB/Swiss-Prot:P0A9Q5|EcoGene:EG10217|GeneID:946796|
3	_KASIPEGVWTK_	_KASIPEGVWTK_	KASIPEGVWTK	17.2439	16130251 GI:16130251	TRUE	_KASIPEGVWTK_	405.896	noloss	4	y	1	533.308	5.85815	TRUE	gi	16130251 GI:16130251	16130251 GI:16130251	ASAP:ABE-0007648|UniProtKB/Swiss-Prot:P0A9Q5|EcoGene:EG10217|GeneID:946796|						GCF_000005845.2_ASM584v2_genomic_29-OCT-2014 _iRT	>gi|16130251 GI:16130251|ASAP:ABE-0007648|UniProtKB/Swiss-Prot:P0A9Q5|EcoGene:EG10217|GeneID:946796|
3	_KASIPEGVWTK_	_KASIPEGVWTK_	KASIPEGVWTK	17.2439	16130251 GI:16130251	TRUE	_KASIPEGVWTK_	405.896	noloss	5	y	1	590.33	47.7039	FALSE	gi	16130251 GI:16130251	16130251 GI:16130251	ASAP:ABE-0007648|UniProtKB/Swiss-Prot:P0A9Q5|EcoGene:EG10217|GeneID:946796|						GCF_000005845.2_ASM584v2_genomic_29-OCT-2014 _iRT	>gi|16130251 GI:16130251|ASAP:ABE-0007648|UniProtKB/Swiss-Prot:P0A9Q5|EcoGene:EG10217|GeneID:946796|
3	_KASIPEGVWTK_	_KASIPEGVWTK_	KASIPEGVWTK	17.2439	16130251 GI:16130251	TRUE	_KASIPEGVWTK_	405.896	noloss	7	b	1	683.372	6.19107	TRUE	gi	16130251 GI:16130251	16130251 GI:16130251	ASAP:ABE-0007648|UniProtKB/Swiss-Prot:P0A9Q5|EcoGene:EG10217|GeneID:946796|						GCF_000005845.2_ASM584v2_genomic_29-OCT-2014 _iRT	>gi|16130251 GI:16130251|ASAP:ABE-0007648|UniProtKB/Swiss-Prot:P0A9Q5|EcoGene:EG10217|GeneID:946796|
3	_KASIPEGVWTK_	_KASIPEGVWTK_	KASIPEGVWTK	17.2439	16130251 GI:16130251	TRUE	_KASIPEGVWTK_	405.896	H2O	6	y	1	701.362	23.7547	FALSE	gi	16130251 GI:16130251	16130251 GI:16130251	ASAP:ABE-0007648|UniProtKB/Swiss-Prot:P0A9Q5|EcoGene:EG10217|GeneID:946796|						GCF_000005845.2_ASM584v2_genomic_29-OCT-2014 _iRT	>gi|16130251 GI:16130251|ASAP:ABE-0007648|UniProtKB/Swiss-Prot:P0A9Q5|EcoGene:EG10217|GeneID:946796|
3	_KASIPEGVWTK_	_KASIPEGVWTK_	KASIPEGVWTK	17.2439	16130251 GI:16130251	TRUE	_KASIPEGVWTK_	405.896	NH3	6	y	1	702.346	9.67639	TRUE	gi	16130251 GI:16130251	16130251 GI:16130251	ASAP:ABE-0007648|UniProtKB/Swiss-Prot:P0A9Q5|EcoGene:EG10217|GeneID:946796|						GCF_000005845.2_ASM584v2_genomic_29-OCT-2014 _iRT	>gi|16130251 GI:16130251|ASAP:ABE-0007648|UniProtKB/Swiss-Prot:P0A9Q5|EcoGene:EG10217|GeneID:946796|
3	_KASIPEGVWTK_	_KASIPEGVWTK_	KASIPEGVWTK	17.2439	16130251 GI:16130251	TRUE	_KASIPEGVWTK_	405.896	noloss	6	y	1	719.372	21.1463	FALSE	gi	16130251 GI:16130251	16130251 GI:16130251	ASAP:ABE-0007648|UniProtKB/Swiss-Prot:P0A9Q5|EcoGene:EG10217|GeneID:946796|						GCF_000005845.2_ASM584v2_genomic_29-OCT-2014 _iRT	>gi|16130251 GI:16130251|ASAP:ABE-0007648|UniProtKB/Swiss-Prot:P0A9Q5|EcoGene:EG10217|GeneID:946796|
3	_KASIPEGVWTK_	_KASIPEGVWTK_	KASIPEGVWTK	17.2439	16130251 GI:16130251	TRUE	_KASIPEGVWTK_	405.896	noloss	7	y	1	816.425	5.01646	TRUE	gi	16130251 GI:16130251	16130251 GI:16130251	ASAP:ABE-0007648|UniProtKB/Swiss-Prot:P0A9Q5|EcoGene:EG10217|GeneID:946796|						GCF_000005845.2_ASM584v2_genomic_29-OCT-2014 _iRT	>gi|16130251 GI:16130251|ASAP:ABE-0007648|UniProtKB/Swiss-Prot:P0A9Q5|EcoGene:EG10217|GeneID:946796|
3	_KGVIEIVSGASR_	_KGVIEIVSGASR_	KGVIEIVSGASR	17.075	16131869 GI:16131869	TRUE	_KGVIEIVSGASR_	405.907	noloss	3	y	1	333.188	7.65077	TRUE	gi	16131869 GI:16131869	16131869 GI:16131869	ASAP:ABE-0013241|UniProtKB/Swiss-Prot:P0A7C2|EcoGene:EG10533|GeneID:948544|						GCF_000005845.2_ASM584v2_genomic_29-OCT-2014 _iRT	>gi|16131869 GI:16131869|ASAP:ABE-0013241|UniProtKB/Swiss-Prot:P0A7C2|EcoGene:EG10533|GeneID:948544|
3	_KGVIEIVSGASR_	_KGVIEIVSGASR_	KGVIEIVSGASR	17.075	16131869 GI:16131869	TRUE	_KGVIEIVSGASR_	405.907	noloss	4	y	1	390.21	31.3859	FALSE	gi	16131869 GI:16131869	16131869 GI:16131869	ASAP:ABE-0013241|UniProtKB/Swiss-Prot:P0A7C2|EcoGene:EG10533|GeneID:948544|						GCF_000005845.2_ASM584v2_genomic_29-OCT-2014 _iRT	>gi|16131869 GI:16131869|ASAP:ABE-0013241|UniProtKB/Swiss-Prot:P0A7C2|EcoGene:EG10533|GeneID:948544|
3	_KGVIEIVSGASR_	_KGVIEIVSGASR_	KGVIEIVSGASR	17.075	16131869 GI:16131869	TRUE	_KGVIEIVSGASR_	405.907	noloss	4	b	1	398.276	13.4	FALSE	gi	16131869 GI:16131869	16131869 GI:16131869	ASAP:ABE-0013241|UniProtKB/Swiss-Prot:P0A7C2|EcoGene:EG10533|GeneID:948544|						GCF_000005845.2_ASM584v2_genomic_29-OCT-2014 _iRT	>gi|16131869 GI:16131869|ASAP:ABE-0013241|UniProtKB/Swiss-Prot:P0A7C2|EcoGene:EG10533|GeneID:948544|
3	_KGVIEIVSGASR_	_KGVIEIVSGASR_	KGVIEIVSGASR	17.075	16131869 GI:16131869	TRUE	_KGVIEIVSGASR_	405.907	H2O	5	y	1	459.231	5.43555	TRUE	gi	16131869 GI:16131869	16131869 GI:16131869	ASAP:ABE-0013241|UniProtKB/Swiss-Prot:P0A7C2|EcoGene:EG10533|GeneID:948544|						GCF_000005845.2_ASM584v2_genomic_29-OCT-2014 _iRT	>gi|16131869 GI:16131869|ASAP:ABE-0013241|UniProtKB/Swiss-Prot:P0A7C2|EcoGene:EG10533|GeneID:948544|
3	_KGVIEIVSGASR_	_KGVIEIVSGASR_	KGVIEIVSGASR	17.075	16131869 GI:16131869	TRUE	_KGVIEIVSGASR_	405.907	NH3	5	y	1	460.215	5.25733	TRUE	gi	16131869 GI:16131869	16131869 GI:16131869	ASAP:ABE-0013241|UniProtKB/Swiss-Prot:P0A7C2|EcoGene:EG10533|GeneID:948544|						GCF_000005845.2_ASM584v2_genomic_29-OCT-2014 _iRT	>gi|16131869 GI:16131869|ASAP:ABE-0013241|UniProtKB/Swiss-Prot:P0A7C2|EcoGene:EG10533|GeneID:948544|
3	_KGVIEIVSGASR_	_KGVIEIVSGASR_	KGVIEIVSGASR	17.075	16131869 GI:16131869	TRUE	_KGVIEIVSGASR_	405.907	noloss	5	y	1	477.242	100	FALSE	gi	16131869 GI:16131869	16131869 GI:16131869	ASAP:ABE-0013241|UniProtKB/Swiss-Prot:P0A7C2|EcoGene:EG10533|GeneID:948544|						GCF_000005845.2_ASM584v2_genomic_29-OCT-2014 _iRT	>gi|16131869 GI:16131869|ASAP:ABE-0013241|UniProtKB/Swiss-Prot:P0A7C2|EcoGene:EG10533|GeneID:948544|
3	_KGVIEIVSGASR_	_KGVIEIVSGASR_	KGVIEIVSGASR	17.075	16131869 GI:16131869	TRUE	_KGVIEIVSGASR_	405.907	H2O	5	b	1	509.308	9.37358	TRUE	gi	16131869 GI:16131869	16131869 GI:16131869	ASAP:ABE-0013241|UniProtKB/Swiss-Prot:P0A7C2|EcoGene:EG10533|GeneID:948544|						GCF_000005845.2_ASM584v2_genomic_29-OCT-2014 _iRT	>gi|16131869 GI:16131869|ASAP:ABE-0013241|UniProtKB/Swiss-Prot:P0A7C2|EcoGene:EG10533|GeneID:948544|
3	_KGVIEIVSGASR_	_KGVIEIVSGASR_	KGVIEIVSGASR	17.075	16131869 GI:16131869	TRUE	_KGVIEIVSGASR_	405.907	noloss	5	b	1	527.319	35.9009	FALSE	gi	16131869 GI:16131869	16131869 GI:16131869	ASAP:ABE-0013241|UniProtKB/Swiss-Prot:P0A7C2|EcoGene:EG10533|GeneID:948544|						GCF_000005845.2_ASM584v2_genomic_29-OCT-2014 _iRT	>gi|16131869 GI:16131869|ASAP:ABE-0013241|UniProtKB/Swiss-Prot:P0A7C2|EcoGene:EG10533|GeneID:948544|
3	_KGVIEIVSGASR_	_KGVIEIVSGASR_	KGVIEIVSGASR	17.075	16131869 GI:16131869	TRUE	_KGVIEIVSGASR_	405.907	noloss	6	y	1	576.31	17.7722	FALSE	gi	16131869 GI:16131869	16131869 GI:16131869	ASAP:ABE-0013241|UniProtKB/Swiss-Prot:P0A7C2|EcoGene:EG10533|GeneID:948544|						GCF_000005845.2_ASM584v2_genomic_29-OCT-2014 _iRT	>gi|16131869 GI:16131869|ASAP:ABE-0013241|UniProtKB/Swiss-Prot:P0A7C2|EcoGene:EG10533|GeneID:948544|
3	_KGVIEIVSGASR_	_KGVIEIVSGASR_	KGVIEIVSGASR	17.075	16131869 GI:16131869	TRUE	_KGVIEIVSGASR_	405.907	noloss	6	b	1	640.403	34.9303	FALSE	gi	16131869 GI:16131869	16131869 GI:16131869	ASAP:ABE-0013241|UniProtKB/Swiss-Prot:P0A7C2|EcoGene:EG10533|GeneID:948544|						GCF_000005845.2_ASM584v2_genomic_29-OCT-2014 _iRT	>gi|16131869 GI:16131869|ASAP:ABE-0013241|UniProtKB/Swiss-Prot:P0A7C2|EcoGene:EG10533|GeneID:948544|
3	_HSFISTLLGIK_	_HSFISTLLGIK_	HSFISTLLGIK	78.3337	16130658 GI:16130658	TRUE	_HSFISTLLGIK_	405.908	noloss	3	y	1	317.218	88.9947	FALSE	gi	16130658 GI:16130658	16130658 GI:16130658	ASAP:ABE-0009026|UniProtKB/Swiss-Prot:P23845|EcoGene:EG10194|GeneID:947219|						GCF_000005845.2_ASM584v2_genomic_29-OCT-2014 _iRT	>gi|16130658 GI:16130658|ASAP:ABE-0009026|UniProtKB/Swiss-Prot:P23845|EcoGene:EG10194|GeneID:947219|
3	_HSFISTLLGIK_	_HSFISTLLGIK_	HSFISTLLGIK	78.3337	16130658 GI:16130658	TRUE	_HSFISTLLGIK_	405.908	H2O	3	b	1	354.156	25.0479	TRUE	gi	16130658 GI:16130658	16130658 GI:16130658	ASAP:ABE-0009026|UniProtKB/Swiss-Prot:P23845|EcoGene:EG10194|GeneID:947219|						GCF_000005845.2_ASM584v2_genomic_29-OCT-2014 _iRT	>gi|16130658 GI:16130658|ASAP:ABE-0009026|UniProtKB/Swiss-Prot:P23845|EcoGene:EG10194|GeneID:947219|
3	_HSFISTLLGIK_	_HSFISTLLGIK_	HSFISTLLGIK	78.3337	16130658 GI:16130658	TRUE	_HSFISTLLGIK_	405.908	noloss	3	b	1	372.167	100	FALSE	gi	16130658 GI:16130658	16130658 GI:16130658	ASAP:ABE-0009026|UniProtKB/Swiss-Prot:P23845|EcoGene:EG10194|GeneID:947219|						GCF_000005845.2_ASM584v2_genomic_29-OCT-2014 _iRT	>gi|16130658 GI:16130658|ASAP:ABE-0009026|UniProtKB/Swiss-Prot:P23845|EcoGene:EG10194|GeneID:947219|
3	_HSFISTLLGIK_	_HSFISTLLGIK_	HSFISTLLGIK	78.3337	16130658 GI:16130658	TRUE	_HSFISTLLGIK_	405.908	noloss	4	y	1	430.302	92.5678	FALSE	gi	16130658 GI:16130658	16130658 GI:16130658	ASAP:ABE-0009026|UniProtKB/Swiss-Prot:P23845|EcoGene:EG10194|GeneID:947219|						GCF_000005845.2_ASM584v2_genomic_29-OCT-2014 _iRT	>gi|16130658 GI:16130658|ASAP:ABE-0009026|UniProtKB/Swiss-Prot:P23845|EcoGene:EG10194|GeneID:947219|
3	_HSFISTLLGIK_	_HSFISTLLGIK_	HSFISTLLGIK	78.3337	16130658 GI:16130658	TRUE	_HSFISTLLGIK_	405.908	noloss	4	b	1	485.251	48.3	FALSE	gi	16130658 GI:16130658	16130658 GI:16130658	ASAP:ABE-0009026|UniProtKB/Swiss-Prot:P23845|EcoGene:EG10194|GeneID:947219|						GCF_000005845.2_ASM584v2_genomic_29-OCT-2014 _iRT	>gi|16130658 GI:16130658|ASAP:ABE-0009026|UniProtKB/Swiss-Prot:P23845|EcoGene:EG10194|GeneID:947219|
3	_HSFISTLLGIK_	_HSFISTLLGIK_	HSFISTLLGIK	78.3337	16130658 GI:16130658	TRUE	_HSFISTLLGIK_	405.908	noloss	5	y	1	543.386	38.8374	FALSE	gi	16130658 GI:16130658	16130658 GI:16130658	ASAP:ABE-0009026|UniProtKB/Swiss-Prot:P23845|EcoGene:EG10194|GeneID:947219|						GCF_000005845.2_ASM584v2_genomic_29-OCT-2014 _iRT	>gi|16130658 GI:16130658|ASAP:ABE-0009026|UniProtKB/Swiss-Prot:P23845|EcoGene:EG10194|GeneID:947219|
3	_HSFISTLLGIK_	_HSFISTLLGIK_	HSFISTLLGIK	78.3337	16130658 GI:16130658	TRUE	_HSFISTLLGIK_	405.908	H2O	5	b	1	554.272	35.5542	FALSE	gi	16130658 GI:16130658	16130658 GI:16130658	ASAP:ABE-0009026|UniProtKB/Swiss-Prot:P23845|EcoGene:EG10194|GeneID:947219|						GCF_000005845.2_ASM584v2_genomic_29-OCT-2014 _iRT	>gi|16130658 GI:16130658|ASAP:ABE-0009026|UniProtKB/Swiss-Prot:P23845|EcoGene:EG10194|GeneID:947219|
3	_HSFISTLLGIK_	_HSFISTLLGIK_	HSFISTLLGIK	78.3337	16130658 GI:16130658	TRUE	_HSFISTLLGIK_	405.908	noloss	6	y	1	644.434	25.7373	TRUE	gi	16130658 GI:16130658	16130658 GI:16130658	ASAP:ABE-0009026|UniProtKB/Swiss-Prot:P23845|EcoGene:EG10194|GeneID:947219|						GCF_000005845.2_ASM584v2_genomic_29-OCT-2014 _iRT	>gi|16130658 GI:16130658|ASAP:ABE-0009026|UniProtKB/Swiss-Prot:P23845|EcoGene:EG10194|GeneID:947219|
3	_HSFISTLLGIK_	_HSFISTLLGIK_	HSFISTLLGIK	78.3337	16130658 GI:16130658	TRUE	_HSFISTLLGIK_	405.908	H2O	6	b	1	655.32	16.8754	TRUE	gi	16130658 GI:16130658	16130658 GI:16130658	ASAP:ABE-0009026|UniProtKB/Swiss-Prot:P23845|EcoGene:EG10194|GeneID:947219|						GCF_000005845.2_ASM584v2_genomic_29-OCT-2014 _iRT	>gi|16130658 GI:16130658|ASAP:ABE-0009026|UniProtKB/Swiss-Prot:P23845|EcoGene:EG10194|GeneID:947219|
3	_HSFISTLLGIK_	_HSFISTLLGIK_	HSFISTLLGIK	78.3337	16130658 GI:16130658	TRUE	_HSFISTLLGIK_	405.908	noloss	6	b	1	673.33	9.48014	TRUE	gi	16130658 GI:16130658	16130658 GI:16130658	ASAP:ABE-0009026|UniProtKB/Swiss-Prot:P23845|EcoGene:EG10194|GeneID:947219|						GCF_000005845.2_ASM584v2_genomic_29-OCT-2014 _iRT	>gi|16130658 GI:16130658|ASAP:ABE-0009026|UniProtKB/Swiss-Prot:P23845|EcoGene:EG10194|GeneID:947219|
3	_HSFISTLLGIK_	_HSFISTLLGIK_	HSFISTLLGIK	78.3337	16130658 GI:16130658	TRUE	_HSFISTLLGIK_	405.908	noloss	7	y	1	731.466	20.0815	TRUE	gi	16130658 GI:16130658	16130658 GI:16130658	ASAP:ABE-0009026|UniProtKB/Swiss-Prot:P23845|EcoGene:EG10194|GeneID:947219|						GCF_000005845.2_ASM584v2_genomic_29-OCT-2014 _iRT	>gi|16130658 GI:16130658|ASAP:ABE-0009026|UniProtKB/Swiss-Prot:P23845|EcoGene:EG10194|GeneID:947219|
3	_HSFISTLLGIK_	_HSFISTLLGIK_	HSFISTLLGIK	78.3337	16130658 GI:16130658	TRUE	_HSFISTLLGIK_	405.908	H2O	4	b	1	467.24	8.5717	TRUE	gi	16130658 GI:16130658	16130658 GI:16130658	ASAP:ABE-0009026|UniProtKB/Swiss-Prot:P23845|EcoGene:EG10194|GeneID:947219|						GCF_000005845.2_ASM584v2_genomic_29-OCT-2014 _iRT	>gi|16130658 GI:16130658|ASAP:ABE-0009026|UniProtKB/Swiss-Prot:P23845|EcoGene:EG10194|GeneID:947219|
3	_HSFISTLLGIK_	_HSFISTLLGIK_	HSFISTLLGIK	78.3337	16130658 GI:16130658	TRUE	_HSFISTLLGIK_	405.908	NH3	6	b	1	656.304	9.39801	TRUE	gi	16130658 GI:16130658	16130658 GI:16130658	ASAP:ABE-0009026|UniProtKB/Swiss-Prot:P23845|EcoGene:EG10194|GeneID:947219|						GCF_000005845.2_ASM584v2_genomic_29-OCT-2014 _iRT	>gi|16130658 GI:16130658|ASAP:ABE-0009026|UniProtKB/Swiss-Prot:P23845|EcoGene:EG10194|GeneID:947219|
3	_HSFISTLLGIK_	_HSFISTLLGIK_	HSFISTLLGIK	78.3337	16130658 GI:16130658	TRUE	_HSFISTLLGIK_	405.908	H2O	6	b	2	328.164	6.85469	TRUE	gi	16130658 GI:16130658	16130658 GI:16130658	ASAP:ABE-0009026|UniProtKB/Swiss-Prot:P23845|EcoGene:EG10194|GeneID:947219|						GCF_000005845.2_ASM584v2_genomic_29-OCT-2014 _iRT	>gi|16130658 GI:16130658|ASAP:ABE-0009026|UniProtKB/Swiss-Prot:P23845|EcoGene:EG10194|GeneID:947219|
3	_HSFISTLLGIK_	_HSFISTLLGIK_	HSFISTLLGIK	78.3337	16130658 GI:16130658	TRUE	_HSFISTLLGIK_	405.908	H2O	10	y	3	354.218	6.77429	TRUE	gi	16130658 GI:16130658	16130658 GI:16130658	ASAP:ABE-0009026|UniProtKB/Swiss-Prot:P23845|EcoGene:EG10194|GeneID:947219|						GCF_000005845.2_ASM584v2_genomic_29-OCT-2014 _iRT	>gi|16130658 GI:16130658|ASAP:ABE-0009026|UniProtKB/Swiss-Prot:P23845|EcoGene:EG10194|GeneID:947219|
3	_HSFISTLLGIK_	_HSFISTLLGIK_	HSFISTLLGIK	78.3337	16130658 GI:16130658	TRUE	_HSFISTLLGIK_	405.908	NH3	5	b	1	555.256	13.3794	TRUE	gi	16130658 GI:16130658	16130658 GI:16130658	ASAP:ABE-0009026|UniProtKB/Swiss-Prot:P23845|EcoGene:EG10194|GeneID:947219|						GCF_000005845.2_ASM584v2_genomic_29-OCT-2014 _iRT	>gi|16130658 GI:16130658|ASAP:ABE-0009026|UniProtKB/Swiss-Prot:P23845|EcoGene:EG10194|GeneID:947219|
3	_AWHSSSETIAK_	_AWHSSSETIAK_	AWHSSSETIAK	-23.2528	16128588 GI:16128588	TRUE	_AWHSSSETIAK_	406.203	noloss	3	y	1	331.234	65.0195	FALSE	gi	16128588 GI:16128588	16128588 GI:16128588	ASAP:ABE-0002090|UniProtKB/Swiss-Prot:P0AE08|EcoGene:EG11384|GeneID:945225|						GCF_000005845.2_ASM584v2_genomic_29-OCT-2014 _iRT	>gi|16128588 GI:16128588|ASAP:ABE-0002090|UniProtKB/Swiss-Prot:P0AE08|EcoGene:EG11384|GeneID:945225|
3	_AWHSSSETIAK_	_AWHSSSETIAK_	AWHSSSETIAK	-23.2528	16128588 GI:16128588	TRUE	_AWHSSSETIAK_	406.203	H2O	3	b	1	377.172	18.5309	TRUE	gi	16128588 GI:16128588	16128588 GI:16128588	ASAP:ABE-0002090|UniProtKB/Swiss-Prot:P0AE08|EcoGene:EG11384|GeneID:945225|						GCF_000005845.2_ASM584v2_genomic_29-OCT-2014 _iRT	>gi|16128588 GI:16128588|ASAP:ABE-0002090|UniProtKB/Swiss-Prot:P0AE08|EcoGene:EG11384|GeneID:945225|
3	_AWHSSSETIAK_	_AWHSSSETIAK_	AWHSSSETIAK	-23.2528	16128588 GI:16128588	TRUE	_AWHSSSETIAK_	406.203	noloss	7	b	2	393.164	7.09948	TRUE	gi	16128588 GI:16128588	16128588 GI:16128588	ASAP:ABE-0002090|UniProtKB/Swiss-Prot:P0AE08|EcoGene:EG11384|GeneID:945225|						GCF_000005845.2_ASM584v2_genomic_29-OCT-2014 _iRT	>gi|16128588 GI:16128588|ASAP:ABE-0002090|UniProtKB/Swiss-Prot:P0AE08|EcoGene:EG11384|GeneID:945225|
3	_AWHSSSETIAK_	_AWHSSSETIAK_	AWHSSSETIAK	-23.2528	16128588 GI:16128588	TRUE	_AWHSSSETIAK_	406.203	noloss	3	b	1	395.183	83.9286	FALSE	gi	16128588 GI:16128588	16128588 GI:16128588	ASAP:ABE-0002090|UniProtKB/Swiss-Prot:P0AE08|EcoGene:EG11384|GeneID:945225|						GCF_000005845.2_ASM584v2_genomic_29-OCT-2014 _iRT	>gi|16128588 GI:16128588|ASAP:ABE-0002090|UniProtKB/Swiss-Prot:P0AE08|EcoGene:EG11384|GeneID:945225|
3	_AWHSSSETIAK_	_AWHSSSETIAK_	AWHSSSETIAK	-23.2528	16128588 GI:16128588	TRUE	_AWHSSSETIAK_	406.203	noloss	4	y	1	432.282	100	FALSE	gi	16128588 GI:16128588	16128588 GI:16128588	ASAP:ABE-0002090|UniProtKB/Swiss-Prot:P0AE08|EcoGene:EG11384|GeneID:945225|						GCF_000005845.2_ASM584v2_genomic_29-OCT-2014 _iRT	>gi|16128588 GI:16128588|ASAP:ABE-0002090|UniProtKB/Swiss-Prot:P0AE08|EcoGene:EG11384|GeneID:945225|
3	_AWHSSSETIAK_	_AWHSSSETIAK_	AWHSSSETIAK	-23.2528	16128588 GI:16128588	TRUE	_AWHSSSETIAK_	406.203	H2O	4	b	1	464.204	13.0991	TRUE	gi	16128588 GI:16128588	16128588 GI:16128588	ASAP:ABE-0002090|UniProtKB/Swiss-Prot:P0AE08|EcoGene:EG11384|GeneID:945225|						GCF_000005845.2_ASM584v2_genomic_29-OCT-2014 _iRT	>gi|16128588 GI:16128588|ASAP:ABE-0002090|UniProtKB/Swiss-Prot:P0AE08|EcoGene:EG11384|GeneID:945225|
3	_AWHSSSETIAK_	_AWHSSSETIAK_	AWHSSSETIAK	-23.2528	16128588 GI:16128588	TRUE	_AWHSSSETIAK_	406.203	NH3	4	b	1	465.188	8.52366	TRUE	gi	16128588 GI:16128588	16128588 GI:16128588	ASAP:ABE-0002090|UniProtKB/Swiss-Prot:P0AE08|EcoGene:EG11384|GeneID:945225|						GCF_000005845.2_ASM584v2_genomic_29-OCT-2014 _iRT	>gi|16128588 GI:16128588|ASAP:ABE-0002090|UniProtKB/Swiss-Prot:P0AE08|EcoGene:EG11384|GeneID:945225|
3	_AWHSSSETIAK_	_AWHSSSETIAK_	AWHSSSETIAK	-23.2528	16128588 GI:16128588	TRUE	_AWHSSSETIAK_	406.203	H2O	9	y	2	471.238	20.3708	TRUE	gi	16128588 GI:16128588	16128588 GI:16128588	ASAP:ABE-0002090|UniProtKB/Swiss-Prot:P0AE08|EcoGene:EG11384|GeneID:945225|						GCF_000005845.2_ASM584v2_genomic_29-OCT-2014 _iRT	>gi|16128588 GI:16128588|ASAP:ABE-0002090|UniProtKB/Swiss-Prot:P0AE08|EcoGene:EG11384|GeneID:945225|
3	_AWHSSSETIAK_	_AWHSSSETIAK_	AWHSSSETIAK	-23.2528	16128588 GI:16128588	TRUE	_AWHSSSETIAK_	406.203	NH3	9	y	2	471.73	13.2608	TRUE	gi	16128588 GI:16128588	16128588 GI:16128588	ASAP:ABE-0002090|UniProtKB/Swiss-Prot:P0AE08|EcoGene:EG11384|GeneID:945225|						GCF_000005845.2_ASM584v2_genomic_29-OCT-2014 _iRT	>gi|16128588 GI:16128588|ASAP:ABE-0002090|UniProtKB/Swiss-Prot:P0AE08|EcoGene:EG11384|GeneID:945225|
3	_AWHSSSETIAK_	_AWHSSSETIAK_	AWHSSSETIAK	-23.2528	16128588 GI:16128588	TRUE	_AWHSSSETIAK_	406.203	noloss	4	b	1	482.215	33.134	FALSE	gi	16128588 GI:16128588	16128588 GI:16128588	ASAP:ABE-0002090|UniProtKB/Swiss-Prot:P0AE08|EcoGene:EG11384|GeneID:945225|						GCF_000005845.2_ASM584v2_genomic_29-OCT-2014 _iRT	>gi|16128588 GI:16128588|ASAP:ABE-0002090|UniProtKB/Swiss-Prot:P0AE08|EcoGene:EG11384|GeneID:945225|
3	_AWHSSSETIAK_	_AWHSSSETIAK_	AWHSSSETIAK	-23.2528	16128588 GI:16128588	TRUE	_AWHSSSETIAK_	406.203	noloss	9	b	2	500.23	15.4751	TRUE	gi	16128588 GI:16128588	16128588 GI:16128588	ASAP:ABE-0002090|UniProtKB/Swiss-Prot:P0AE08|EcoGene:EG11384|GeneID:945225|						GCF_000005845.2_ASM584v2_genomic_29-OCT-2014 _iRT	>gi|16128588 GI:16128588|ASAP:ABE-0002090|UniProtKB/Swiss-Prot:P0AE08|EcoGene:EG11384|GeneID:945225|
3	_AWHSSSETIAK_	_AWHSSSETIAK_	AWHSSSETIAK	-23.2528	16128588 GI:16128588	TRUE	_AWHSSSETIAK_	406.203	H2O	5	y	1	543.314	28.2431	TRUE	gi	16128588 GI:16128588	16128588 GI:16128588	ASAP:ABE-0002090|UniProtKB/Swiss-Prot:P0AE08|EcoGene:EG11384|GeneID:945225|						GCF_000005845.2_ASM584v2_genomic_29-OCT-2014 _iRT	>gi|16128588 GI:16128588|ASAP:ABE-0002090|UniProtKB/Swiss-Prot:P0AE08|EcoGene:EG11384|GeneID:945225|
3	_AWHSSSETIAK_	_AWHSSSETIAK_	AWHSSSETIAK	-23.2528	16128588 GI:16128588	TRUE	_AWHSSSETIAK_	406.203	NH3	5	y	1	544.298	10.458	TRUE	gi	16128588 GI:16128588	16128588 GI:16128588	ASAP:ABE-0002090|UniProtKB/Swiss-Prot:P0AE08|EcoGene:EG11384|GeneID:945225|						GCF_000005845.2_ASM584v2_genomic_29-OCT-2014 _iRT	>gi|16128588 GI:16128588|ASAP:ABE-0002090|UniProtKB/Swiss-Prot:P0AE08|EcoGene:EG11384|GeneID:945225|
3	_AWHSSSETIAK_	_AWHSSSETIAK_	AWHSSSETIAK	-23.2528	16128588 GI:16128588	TRUE	_AWHSSSETIAK_	406.203	H2O	5	b	1	551.236	29.9745	FALSE	gi	16128588 GI:16128588	16128588 GI:16128588	ASAP:ABE-0002090|UniProtKB/Swiss-Prot:P0AE08|EcoGene:EG11384|GeneID:945225|						GCF_000005845.2_ASM584v2_genomic_29-OCT-2014 _iRT	>gi|16128588 GI:16128588|ASAP:ABE-0002090|UniProtKB/Swiss-Prot:P0AE08|EcoGene:EG11384|GeneID:945225|
3	_AWHSSSETIAK_	_AWHSSSETIAK_	AWHSSSETIAK	-23.2528	16128588 GI:16128588	TRUE	_AWHSSSETIAK_	406.203	NH3	5	b	1	552.22	11.3345	TRUE	gi	16128588 GI:16128588	16128588 GI:16128588	ASAP:ABE-0002090|UniProtKB/Swiss-Prot:P0AE08|EcoGene:EG11384|GeneID:945225|						GCF_000005845.2_ASM584v2_genomic_29-OCT-2014 _iRT	>gi|16128588 GI:16128588|ASAP:ABE-0002090|UniProtKB/Swiss-Prot:P0AE08|EcoGene:EG11384|GeneID:945225|
3	_AWHSSSETIAK_	_AWHSSSETIAK_	AWHSSSETIAK	-23.2528	16128588 GI:16128588	TRUE	_AWHSSSETIAK_	406.203	noloss	5	y	1	561.324	21.9976	TRUE	gi	16128588 GI:16128588	16128588 GI:16128588	ASAP:ABE-0002090|UniProtKB/Swiss-Prot:P0AE08|EcoGene:EG11384|GeneID:945225|						GCF_000005845.2_ASM584v2_genomic_29-OCT-2014 _iRT	>gi|16128588 GI:16128588|ASAP:ABE-0002090|UniProtKB/Swiss-Prot:P0AE08|EcoGene:EG11384|GeneID:945225|
3	_AWHSSSETIAK_	_AWHSSSETIAK_	AWHSSSETIAK	-23.2528	16128588 GI:16128588	TRUE	_AWHSSSETIAK_	406.203	H2O	10	y	2	564.278	6.68814	TRUE	gi	16128588 GI:16128588	16128588 GI:16128588	ASAP:ABE-0002090|UniProtKB/Swiss-Prot:P0AE08|EcoGene:EG11384|GeneID:945225|						GCF_000005845.2_ASM584v2_genomic_29-OCT-2014 _iRT	>gi|16128588 GI:16128588|ASAP:ABE-0002090|UniProtKB/Swiss-Prot:P0AE08|EcoGene:EG11384|GeneID:945225|
3	_AWHSSSETIAK_	_AWHSSSETIAK_	AWHSSSETIAK	-23.2528	16128588 GI:16128588	TRUE	_AWHSSSETIAK_	406.203	NH3	10	y	2	564.77	10.6386	TRUE	gi	16128588 GI:16128588	16128588 GI:16128588	ASAP:ABE-0002090|UniProtKB/Swiss-Prot:P0AE08|EcoGene:EG11384|GeneID:945225|						GCF_000005845.2_ASM584v2_genomic_29-OCT-2014 _iRT	>gi|16128588 GI:16128588|ASAP:ABE-0002090|UniProtKB/Swiss-Prot:P0AE08|EcoGene:EG11384|GeneID:945225|
3	_AWHSSSETIAK_	_AWHSSSETIAK_	AWHSSSETIAK	-23.2528	16128588 GI:16128588	TRUE	_AWHSSSETIAK_	406.203	noloss	5	b	1	569.247	13.2043	TRUE	gi	16128588 GI:16128588	16128588 GI:16128588	ASAP:ABE-0002090|UniProtKB/Swiss-Prot:P0AE08|EcoGene:EG11384|GeneID:945225|						GCF_000005845.2_ASM584v2_genomic_29-OCT-2014 _iRT	>gi|16128588 GI:16128588|ASAP:ABE-0002090|UniProtKB/Swiss-Prot:P0AE08|EcoGene:EG11384|GeneID:945225|
3	_AWHSSSETIAK_	_AWHSSSETIAK_	AWHSSSETIAK	-23.2528	16128588 GI:16128588	TRUE	_AWHSSSETIAK_	406.203	H2O	6	y	1	630.346	7.30912	TRUE	gi	16128588 GI:16128588	16128588 GI:16128588	ASAP:ABE-0002090|UniProtKB/Swiss-Prot:P0AE08|EcoGene:EG11384|GeneID:945225|						GCF_000005845.2_ASM584v2_genomic_29-OCT-2014 _iRT	>gi|16128588 GI:16128588|ASAP:ABE-0002090|UniProtKB/Swiss-Prot:P0AE08|EcoGene:EG11384|GeneID:945225|
3	_AWHSSSETIAK_	_AWHSSSETIAK_	AWHSSSETIAK	-23.2528	16128588 GI:16128588	TRUE	_AWHSSSETIAK_	406.203	H2O	6	b	1	638.268	32.0097	FALSE	gi	16128588 GI:16128588	16128588 GI:16128588	ASAP:ABE-0002090|UniProtKB/Swiss-Prot:P0AE08|EcoGene:EG11384|GeneID:945225|						GCF_000005845.2_ASM584v2_genomic_29-OCT-2014 _iRT	>gi|16128588 GI:16128588|ASAP:ABE-0002090|UniProtKB/Swiss-Prot:P0AE08|EcoGene:EG11384|GeneID:945225|
3	_AWHSSSETIAK_	_AWHSSSETIAK_	AWHSSSETIAK	-23.2528	16128588 GI:16128588	TRUE	_AWHSSSETIAK_	406.203	NH3	6	b	1	639.252	10.0906	TRUE	gi	16128588 GI:16128588	16128588 GI:16128588	ASAP:ABE-0002090|UniProtKB/Swiss-Prot:P0AE08|EcoGene:EG11384|GeneID:945225|						GCF_000005845.2_ASM584v2_genomic_29-OCT-2014 _iRT	>gi|16128588 GI:16128588|ASAP:ABE-0002090|UniProtKB/Swiss-Prot:P0AE08|EcoGene:EG11384|GeneID:945225|
3	_AWHSSSETIAK_	_AWHSSSETIAK_	AWHSSSETIAK	-23.2528	16128588 GI:16128588	TRUE	_AWHSSSETIAK_	406.203	noloss	6	y	1	648.356	13.4197	TRUE	gi	16128588 GI:16128588	16128588 GI:16128588	ASAP:ABE-0002090|UniProtKB/Swiss-Prot:P0AE08|EcoGene:EG11384|GeneID:945225|						GCF_000005845.2_ASM584v2_genomic_29-OCT-2014 _iRT	>gi|16128588 GI:16128588|ASAP:ABE-0002090|UniProtKB/Swiss-Prot:P0AE08|EcoGene:EG11384|GeneID:945225|
3	_AWHSSSETIAK_	_AWHSSSETIAK_	AWHSSSETIAK	-23.2528	16128588 GI:16128588	TRUE	_AWHSSSETIAK_	406.203	noloss	6	b	1	656.279	13.1493	TRUE	gi	16128588 GI:16128588	16128588 GI:16128588	ASAP:ABE-0002090|UniProtKB/Swiss-Prot:P0AE08|EcoGene:EG11384|GeneID:945225|						GCF_000005845.2_ASM584v2_genomic_29-OCT-2014 _iRT	>gi|16128588 GI:16128588|ASAP:ABE-0002090|UniProtKB/Swiss-Prot:P0AE08|EcoGene:EG11384|GeneID:945225|
3	_AWHSSSETIAK_	_AWHSSSETIAK_	AWHSSSETIAK	-23.2528	16128588 GI:16128588	TRUE	_AWHSSSETIAK_	406.203	noloss	7	y	1	735.388	6.48889	TRUE	gi	16128588 GI:16128588	16128588 GI:16128588	ASAP:ABE-0002090|UniProtKB/Swiss-Prot:P0AE08|EcoGene:EG11384|GeneID:945225|						GCF_000005845.2_ASM584v2_genomic_29-OCT-2014 _iRT	>gi|16128588 GI:16128588|ASAP:ABE-0002090|UniProtKB/Swiss-Prot:P0AE08|EcoGene:EG11384|GeneID:945225|
3	_AWHSSSETIAK_	_AWHSSSETIAK_	AWHSSSETIAK	-23.2528	16128588 GI:16128588	TRUE	_AWHSSSETIAK_	406.203	H2O	7	b	1	767.311	12.8105	TRUE	gi	16128588 GI:16128588	16128588 GI:16128588	ASAP:ABE-0002090|UniProtKB/Swiss-Prot:P0AE08|EcoGene:EG11384|GeneID:945225|						GCF_000005845.2_ASM584v2_genomic_29-OCT-2014 _iRT	>gi|16128588 GI:16128588|ASAP:ABE-0002090|UniProtKB/Swiss-Prot:P0AE08|EcoGene:EG11384|GeneID:945225|
3	_AWHSSSETIAK_	_AWHSSSETIAK_	AWHSSSETIAK	-23.2528	16128588 GI:16128588	TRUE	_AWHSSSETIAK_	406.203	noloss	7	b	1	785.321	7.60264	TRUE	gi	16128588 GI:16128588	16128588 GI:16128588	ASAP:ABE-0002090|UniProtKB/Swiss-Prot:P0AE08|EcoGene:EG11384|GeneID:945225|						GCF_000005845.2_ASM584v2_genomic_29-OCT-2014 _iRT	>gi|16128588 GI:16128588|ASAP:ABE-0002090|UniProtKB/Swiss-Prot:P0AE08|EcoGene:EG11384|GeneID:945225|
3	_AWHSSSETIAK_	_AWHSSSETIAK_	AWHSSSETIAK	-23.2528	16128588 GI:16128588	TRUE	_AWHSSSETIAK_	406.203	H2O	8	y	1	804.41	15.5441	TRUE	gi	16128588 GI:16128588	16128588 GI:16128588	ASAP:ABE-0002090|UniProtKB/Swiss-Prot:P0AE08|EcoGene:EG11384|GeneID:945225|						GCF_000005845.2_ASM584v2_genomic_29-OCT-2014 _iRT	>gi|16128588 GI:16128588|ASAP:ABE-0002090|UniProtKB/Swiss-Prot:P0AE08|EcoGene:EG11384|GeneID:945225|
3	_AWHSSSETIAK_	_AWHSSSETIAK_	AWHSSSETIAK	-23.2528	16128588 GI:16128588	TRUE	_AWHSSSETIAK_	406.203	NH3	8	y	1	805.394	5.71189	TRUE	gi	16128588 GI:16128588	16128588 GI:16128588	ASAP:ABE-0002090|UniProtKB/Swiss-Prot:P0AE08|EcoGene:EG11384|GeneID:945225|						GCF_000005845.2_ASM584v2_genomic_29-OCT-2014 _iRT	>gi|16128588 GI:16128588|ASAP:ABE-0002090|UniProtKB/Swiss-Prot:P0AE08|EcoGene:EG11384|GeneID:945225|
3	_AWHSSSETIAK_	_AWHSSSETIAK_	AWHSSSETIAK	-23.2528	16128588 GI:16128588	TRUE	_AWHSSSETIAK_	406.203	noloss	8	y	1	822.42	25.8091	TRUE	gi	16128588 GI:16128588	16128588 GI:16128588	ASAP:ABE-0002090|UniProtKB/Swiss-Prot:P0AE08|EcoGene:EG11384|GeneID:945225|						GCF_000005845.2_ASM584v2_genomic_29-OCT-2014 _iRT	>gi|16128588 GI:16128588|ASAP:ABE-0002090|UniProtKB/Swiss-Prot:P0AE08|EcoGene:EG11384|GeneID:945225|
3	_AWHSSSETIAK_	_AWHSSSETIAK_	AWHSSSETIAK	-23.2528	16128588 GI:16128588	TRUE	_AWHSSSETIAK_	406.203	H2O	8	b	1	868.358	8.10663	TRUE	gi	16128588 GI:16128588	16128588 GI:16128588	ASAP:ABE-0002090|UniProtKB/Swiss-Prot:P0AE08|EcoGene:EG11384|GeneID:945225|						GCF_000005845.2_ASM584v2_genomic_29-OCT-2014 _iRT	>gi|16128588 GI:16128588|ASAP:ABE-0002090|UniProtKB/Swiss-Prot:P0AE08|EcoGene:EG11384|GeneID:945225|
3	_AWHSSSETIAK_	_AWHSSSETIAK_	AWHSSSETIAK	-23.2528	16128588 GI:16128588	TRUE	_AWHSSSETIAK_	406.203	NH3	9	y	1	942.453	5.17852	TRUE	gi	16128588 GI:16128588	16128588 GI:16128588	ASAP:ABE-0002090|UniProtKB/Swiss-Prot:P0AE08|EcoGene:EG11384|GeneID:945225|						GCF_000005845.2_ASM584v2_genomic_29-OCT-2014 _iRT	>gi|16128588 GI:16128588|ASAP:ABE-0002090|UniProtKB/Swiss-Prot:P0AE08|EcoGene:EG11384|GeneID:945225|
3	_AWHSSSETIAK_	_AWHSSSETIAK_	AWHSSSETIAK	-23.2528	16128588 GI:16128588	TRUE	_AWHSSSETIAK_	406.203	noloss	10	y	2	573.283	13.0921	TRUE	gi	16128588 GI:16128588	16128588 GI:16128588	ASAP:ABE-0002090|UniProtKB/Swiss-Prot:P0AE08|EcoGene:EG11384|GeneID:945225|						GCF_000005845.2_ASM584v2_genomic_29-OCT-2014 _iRT	>gi|16128588 GI:16128588|ASAP:ABE-0002090|UniProtKB/Swiss-Prot:P0AE08|EcoGene:EG11384|GeneID:945225|
3	_AWHSSSETIAK_	_AWHSSSETIAK_	AWHSSSETIAK	-23.2528	16128588 GI:16128588	TRUE	_AWHSSSETIAK_	406.203	H2O	9	y	1	941.469	8.09575	TRUE	gi	16128588 GI:16128588	16128588 GI:16128588	ASAP:ABE-0002090|UniProtKB/Swiss-Prot:P0AE08|EcoGene:EG11384|GeneID:945225|						GCF_000005845.2_ASM584v2_genomic_29-OCT-2014 _iRT	>gi|16128588 GI:16128588|ASAP:ABE-0002090|UniProtKB/Swiss-Prot:P0AE08|EcoGene:EG11384|GeneID:945225|
3	_YGGLLWGEHGK_	_YGGLLWGEHGK_	YGGLLWGEHGK	28.2355	16129643 GI:16129643	TRUE	_YGGLLWGEHGK_	406.208	H2O	3	y	1	323.183	9.66034	TRUE	gi	16129643 GI:16129643	16129643 GI:16129643	ASAP:ABE-0005632|UniProtKB/Swiss-Prot:P77748|EcoGene:EG13969|GeneID:946189|						GCF_000005845.2_ASM584v2_genomic_29-OCT-2014 _iRT	>gi|16129643 GI:16129643|ASAP:ABE-0005632|UniProtKB/Swiss-Prot:P77748|EcoGene:EG13969|GeneID:946189|
3	_YGGLLWGEHGK_	_YGGLLWGEHGK_	YGGLLWGEHGK	28.2355	16129643 GI:16129643	TRUE	_YGGLLWGEHGK_	406.208	noloss	3	y	1	341.193	55.7814	FALSE	gi	16129643 GI:16129643	16129643 GI:16129643	ASAP:ABE-0005632|UniProtKB/Swiss-Prot:P77748|EcoGene:EG13969|GeneID:946189|						GCF_000005845.2_ASM584v2_genomic_29-OCT-2014 _iRT	>gi|16129643 GI:16129643|ASAP:ABE-0005632|UniProtKB/Swiss-Prot:P77748|EcoGene:EG13969|GeneID:946189|
3	_YGGLLWGEHGK_	_YGGLLWGEHGK_	YGGLLWGEHGK	28.2355	16129643 GI:16129643	TRUE	_YGGLLWGEHGK_	406.208	NH3	10	y	3	346.179	7.04401	TRUE	gi	16129643 GI:16129643	16129643 GI:16129643	ASAP:ABE-0005632|UniProtKB/Swiss-Prot:P77748|EcoGene:EG13969|GeneID:946189|						GCF_000005845.2_ASM584v2_genomic_29-OCT-2014 _iRT	>gi|16129643 GI:16129643|ASAP:ABE-0005632|UniProtKB/Swiss-Prot:P77748|EcoGene:EG13969|GeneID:946189|
3	_YGGLLWGEHGK_	_YGGLLWGEHGK_	YGGLLWGEHGK	28.2355	16129643 GI:16129643	TRUE	_YGGLLWGEHGK_	406.208	NH3	6	y	2	348.659	14.6034	FALSE	gi	16129643 GI:16129643	16129643 GI:16129643	ASAP:ABE-0005632|UniProtKB/Swiss-Prot:P77748|EcoGene:EG13969|GeneID:946189|						GCF_000005845.2_ASM584v2_genomic_29-OCT-2014 _iRT	>gi|16129643 GI:16129643|ASAP:ABE-0005632|UniProtKB/Swiss-Prot:P77748|EcoGene:EG13969|GeneID:946189|
3	_YGGLLWGEHGK_	_YGGLLWGEHGK_	YGGLLWGEHGK	28.2355	16129643 GI:16129643	TRUE	_YGGLLWGEHGK_	406.208	noloss	4	b	1	391.198	10.5002	TRUE	gi	16129643 GI:16129643	16129643 GI:16129643	ASAP:ABE-0005632|UniProtKB/Swiss-Prot:P77748|EcoGene:EG13969|GeneID:946189|						GCF_000005845.2_ASM584v2_genomic_29-OCT-2014 _iRT	>gi|16129643 GI:16129643|ASAP:ABE-0005632|UniProtKB/Swiss-Prot:P77748|EcoGene:EG13969|GeneID:946189|
3	_YGGLLWGEHGK_	_YGGLLWGEHGK_	YGGLLWGEHGK	28.2355	16129643 GI:16129643	TRUE	_YGGLLWGEHGK_	406.208	noloss	7	y	2	413.714	5.73439	TRUE	gi	16129643 GI:16129643	16129643 GI:16129643	ASAP:ABE-0005632|UniProtKB/Swiss-Prot:P77748|EcoGene:EG13969|GeneID:946189|						GCF_000005845.2_ASM584v2_genomic_29-OCT-2014 _iRT	>gi|16129643 GI:16129643|ASAP:ABE-0005632|UniProtKB/Swiss-Prot:P77748|EcoGene:EG13969|GeneID:946189|
3	_YGGLLWGEHGK_	_YGGLLWGEHGK_	YGGLLWGEHGK	28.2355	16129643 GI:16129643	TRUE	_YGGLLWGEHGK_	406.208	noloss	4	y	1	470.236	10.1686	TRUE	gi	16129643 GI:16129643	16129643 GI:16129643	ASAP:ABE-0005632|UniProtKB/Swiss-Prot:P77748|EcoGene:EG13969|GeneID:946189|						GCF_000005845.2_ASM584v2_genomic_29-OCT-2014 _iRT	>gi|16129643 GI:16129643|ASAP:ABE-0005632|UniProtKB/Swiss-Prot:P77748|EcoGene:EG13969|GeneID:946189|
3	_YGGLLWGEHGK_	_YGGLLWGEHGK_	YGGLLWGEHGK	28.2355	16129643 GI:16129643	TRUE	_YGGLLWGEHGK_	406.208	H2O	5	y	1	509.247	8.3238	TRUE	gi	16129643 GI:16129643	16129643 GI:16129643	ASAP:ABE-0005632|UniProtKB/Swiss-Prot:P77748|EcoGene:EG13969|GeneID:946189|						GCF_000005845.2_ASM584v2_genomic_29-OCT-2014 _iRT	>gi|16129643 GI:16129643|ASAP:ABE-0005632|UniProtKB/Swiss-Prot:P77748|EcoGene:EG13969|GeneID:946189|
3	_YGGLLWGEHGK_	_YGGLLWGEHGK_	YGGLLWGEHGK	28.2355	16129643 GI:16129643	TRUE	_YGGLLWGEHGK_	406.208	noloss	10	y	2	527.277	86.7321	FALSE	gi	16129643 GI:16129643	16129643 GI:16129643	ASAP:ABE-0005632|UniProtKB/Swiss-Prot:P77748|EcoGene:EG13969|GeneID:946189|						GCF_000005845.2_ASM584v2_genomic_29-OCT-2014 _iRT	>gi|16129643 GI:16129643|ASAP:ABE-0005632|UniProtKB/Swiss-Prot:P77748|EcoGene:EG13969|GeneID:946189|
3	_YGGLLWGEHGK_	_YGGLLWGEHGK_	YGGLLWGEHGK	28.2355	16129643 GI:16129643	TRUE	_YGGLLWGEHGK_	406.208	H2O	6	y	1	695.326	11.0229	FALSE	gi	16129643 GI:16129643	16129643 GI:16129643	ASAP:ABE-0005632|UniProtKB/Swiss-Prot:P77748|EcoGene:EG13969|GeneID:946189|						GCF_000005845.2_ASM584v2_genomic_29-OCT-2014 _iRT	>gi|16129643 GI:16129643|ASAP:ABE-0005632|UniProtKB/Swiss-Prot:P77748|EcoGene:EG13969|GeneID:946189|
3	_YGGLLWGEHGK_	_YGGLLWGEHGK_	YGGLLWGEHGK	28.2355	16129643 GI:16129643	TRUE	_YGGLLWGEHGK_	406.208	noloss	6	y	1	713.337	100	FALSE	gi	16129643 GI:16129643	16129643 GI:16129643	ASAP:ABE-0005632|UniProtKB/Swiss-Prot:P77748|EcoGene:EG13969|GeneID:946189|						GCF_000005845.2_ASM584v2_genomic_29-OCT-2014 _iRT	>gi|16129643 GI:16129643|ASAP:ABE-0005632|UniProtKB/Swiss-Prot:P77748|EcoGene:EG13969|GeneID:946189|
3	_YGGLLWGEHGK_	_YGGLLWGEHGK_	YGGLLWGEHGK	28.2355	16129643 GI:16129643	TRUE	_YGGLLWGEHGK_	406.208	noloss	7	y	1	826.421	26.9228	FALSE	gi	16129643 GI:16129643	16129643 GI:16129643	ASAP:ABE-0005632|UniProtKB/Swiss-Prot:P77748|EcoGene:EG13969|GeneID:946189|						GCF_000005845.2_ASM584v2_genomic_29-OCT-2014 _iRT	>gi|16129643 GI:16129643|ASAP:ABE-0005632|UniProtKB/Swiss-Prot:P77748|EcoGene:EG13969|GeneID:946189|
3	_YGGLLWGEHGK_	_YGGLLWGEHGK_	YGGLLWGEHGK	28.2355	16129643 GI:16129643	TRUE	_YGGLLWGEHGK_	406.208	noloss	8	y	2	470.256	8.60216	TRUE	gi	16129643 GI:16129643	16129643 GI:16129643	ASAP:ABE-0005632|UniProtKB/Swiss-Prot:P77748|EcoGene:EG13969|GeneID:946189|						GCF_000005845.2_ASM584v2_genomic_29-OCT-2014 _iRT	>gi|16129643 GI:16129643|ASAP:ABE-0005632|UniProtKB/Swiss-Prot:P77748|EcoGene:EG13969|GeneID:946189|
3	_VDFDKDFFGK_	_VDFDKDFFGK_	VDFDKDFFGK	51.3436	16128897 GI:16128897	TRUE	_VDFDKDFFGK_	406.533	noloss	5	y	2	307.153	5.5979	TRUE	gi	16128897 GI:16128897	16128897 GI:16128897	ASAP:ABE-0003162|UniProtKB/Swiss-Prot:P0A8M0|EcoGene:EG10094|GeneID:945555|						GCF_000005845.2_ASM584v2_genomic_29-OCT-2014 _iRT	>gi|16128897 GI:16128897|ASAP:ABE-0003162|UniProtKB/Swiss-Prot:P0A8M0|EcoGene:EG10094|GeneID:945555|
3	_VDFDKDFFGK_	_VDFDKDFFGK_	VDFDKDFFGK	51.3436	16128897 GI:16128897	TRUE	_VDFDKDFFGK_	406.533	noloss	3	y	1	351.203	88.697	FALSE	gi	16128897 GI:16128897	16128897 GI:16128897	ASAP:ABE-0003162|UniProtKB/Swiss-Prot:P0A8M0|EcoGene:EG10094|GeneID:945555|						GCF_000005845.2_ASM584v2_genomic_29-OCT-2014 _iRT	>gi|16128897 GI:16128897|ASAP:ABE-0003162|UniProtKB/Swiss-Prot:P0A8M0|EcoGene:EG10094|GeneID:945555|
3	_VDFDKDFFGK_	_VDFDKDFFGK_	VDFDKDFFGK	51.3436	16128897 GI:16128897	TRUE	_VDFDKDFFGK_	406.533	NH3	6	y	2	362.687	15.8677	TRUE	gi	16128897 GI:16128897	16128897 GI:16128897	ASAP:ABE-0003162|UniProtKB/Swiss-Prot:P0A8M0|EcoGene:EG10094|GeneID:945555|						GCF_000005845.2_ASM584v2_genomic_29-OCT-2014 _iRT	>gi|16128897 GI:16128897|ASAP:ABE-0003162|UniProtKB/Swiss-Prot:P0A8M0|EcoGene:EG10094|GeneID:945555|
3	_VDFDKDFFGK_	_VDFDKDFFGK_	VDFDKDFFGK	51.3436	16128897 GI:16128897	TRUE	_VDFDKDFFGK_	406.533	noloss	6	y	2	371.2	18.3986	TRUE	gi	16128897 GI:16128897	16128897 GI:16128897	ASAP:ABE-0003162|UniProtKB/Swiss-Prot:P0A8M0|EcoGene:EG10094|GeneID:945555|						GCF_000005845.2_ASM584v2_genomic_29-OCT-2014 _iRT	>gi|16128897 GI:16128897|ASAP:ABE-0003162|UniProtKB/Swiss-Prot:P0A8M0|EcoGene:EG10094|GeneID:945555|
3	_VDFDKDFFGK_	_VDFDKDFFGK_	VDFDKDFFGK	51.3436	16128897 GI:16128897	TRUE	_VDFDKDFFGK_	406.533	H2O	7	y	2	419.708	7.94527	TRUE	gi	16128897 GI:16128897	16128897 GI:16128897	ASAP:ABE-0003162|UniProtKB/Swiss-Prot:P0A8M0|EcoGene:EG10094|GeneID:945555|						GCF_000005845.2_ASM584v2_genomic_29-OCT-2014 _iRT	>gi|16128897 GI:16128897|ASAP:ABE-0003162|UniProtKB/Swiss-Prot:P0A8M0|EcoGene:EG10094|GeneID:945555|
3	_VDFDKDFFGK_	_VDFDKDFFGK_	VDFDKDFFGK	51.3436	16128897 GI:16128897	TRUE	_VDFDKDFFGK_	406.533	NH3	7	y	2	420.2	8.00253	TRUE	gi	16128897 GI:16128897	16128897 GI:16128897	ASAP:ABE-0003162|UniProtKB/Swiss-Prot:P0A8M0|EcoGene:EG10094|GeneID:945555|						GCF_000005845.2_ASM584v2_genomic_29-OCT-2014 _iRT	>gi|16128897 GI:16128897|ASAP:ABE-0003162|UniProtKB/Swiss-Prot:P0A8M0|EcoGene:EG10094|GeneID:945555|
3	_VDFDKDFFGK_	_VDFDKDFFGK_	VDFDKDFFGK	51.3436	16128897 GI:16128897	TRUE	_VDFDKDFFGK_	406.533	noloss	7	y	2	428.714	30.9398	TRUE	gi	16128897 GI:16128897	16128897 GI:16128897	ASAP:ABE-0003162|UniProtKB/Swiss-Prot:P0A8M0|EcoGene:EG10094|GeneID:945555|						GCF_000005845.2_ASM584v2_genomic_29-OCT-2014 _iRT	>gi|16128897 GI:16128897|ASAP:ABE-0003162|UniProtKB/Swiss-Prot:P0A8M0|EcoGene:EG10094|GeneID:945555|
3	_VDFDKDFFGK_	_VDFDKDFFGK_	VDFDKDFFGK	51.3436	16128897 GI:16128897	TRUE	_VDFDKDFFGK_	406.533	H2O	8	y	2	493.243	11.5406	TRUE	gi	16128897 GI:16128897	16128897 GI:16128897	ASAP:ABE-0003162|UniProtKB/Swiss-Prot:P0A8M0|EcoGene:EG10094|GeneID:945555|						GCF_000005845.2_ASM584v2_genomic_29-OCT-2014 _iRT	>gi|16128897 GI:16128897|ASAP:ABE-0003162|UniProtKB/Swiss-Prot:P0A8M0|EcoGene:EG10094|GeneID:945555|
3	_VDFDKDFFGK_	_VDFDKDFFGK_	VDFDKDFFGK	51.3436	16128897 GI:16128897	TRUE	_VDFDKDFFGK_	406.533	noloss	4	y	1	498.271	66.5142	FALSE	gi	16128897 GI:16128897	16128897 GI:16128897	ASAP:ABE-0003162|UniProtKB/Swiss-Prot:P0A8M0|EcoGene:EG10094|GeneID:945555|						GCF_000005845.2_ASM584v2_genomic_29-OCT-2014 _iRT	>gi|16128897 GI:16128897|ASAP:ABE-0003162|UniProtKB/Swiss-Prot:P0A8M0|EcoGene:EG10094|GeneID:945555|
3	_VDFDKDFFGK_	_VDFDKDFFGK_	VDFDKDFFGK	51.3436	16128897 GI:16128897	TRUE	_VDFDKDFFGK_	406.533	noloss	8	y	2	502.248	42.7104	FALSE	gi	16128897 GI:16128897	16128897 GI:16128897	ASAP:ABE-0003162|UniProtKB/Swiss-Prot:P0A8M0|EcoGene:EG10094|GeneID:945555|						GCF_000005845.2_ASM584v2_genomic_29-OCT-2014 _iRT	>gi|16128897 GI:16128897|ASAP:ABE-0003162|UniProtKB/Swiss-Prot:P0A8M0|EcoGene:EG10094|GeneID:945555|
3	_VDFDKDFFGK_	_VDFDKDFFGK_	VDFDKDFFGK	51.3436	16128897 GI:16128897	TRUE	_VDFDKDFFGK_	406.533	H2O	9	y	2	550.756	8.69462	TRUE	gi	16128897 GI:16128897	16128897 GI:16128897	ASAP:ABE-0003162|UniProtKB/Swiss-Prot:P0A8M0|EcoGene:EG10094|GeneID:945555|						GCF_000005845.2_ASM584v2_genomic_29-OCT-2014 _iRT	>gi|16128897 GI:16128897|ASAP:ABE-0003162|UniProtKB/Swiss-Prot:P0A8M0|EcoGene:EG10094|GeneID:945555|
3	_VDFDKDFFGK_	_VDFDKDFFGK_	VDFDKDFFGK	51.3436	16128897 GI:16128897	TRUE	_VDFDKDFFGK_	406.533	NH3	9	y	2	551.248	13.9382	TRUE	gi	16128897 GI:16128897	16128897 GI:16128897	ASAP:ABE-0003162|UniProtKB/Swiss-Prot:P0A8M0|EcoGene:EG10094|GeneID:945555|						GCF_000005845.2_ASM584v2_genomic_29-OCT-2014 _iRT	>gi|16128897 GI:16128897|ASAP:ABE-0003162|UniProtKB/Swiss-Prot:P0A8M0|EcoGene:EG10094|GeneID:945555|
3	_VDFDKDFFGK_	_VDFDKDFFGK_	VDFDKDFFGK	51.3436	16128897 GI:16128897	TRUE	_VDFDKDFFGK_	406.533	noloss	9	y	2	559.761	29.0026	TRUE	gi	16128897 GI:16128897	16128897 GI:16128897	ASAP:ABE-0003162|UniProtKB/Swiss-Prot:P0A8M0|EcoGene:EG10094|GeneID:945555|						GCF_000005845.2_ASM584v2_genomic_29-OCT-2014 _iRT	>gi|16128897 GI:16128897|ASAP:ABE-0003162|UniProtKB/Swiss-Prot:P0A8M0|EcoGene:EG10094|GeneID:945555|
3	_VDFDKDFFGK_	_VDFDKDFFGK_	VDFDKDFFGK	51.3436	16128897 GI:16128897	TRUE	_VDFDKDFFGK_	406.533	H2O	5	y	1	595.287	10.9185	TRUE	gi	16128897 GI:16128897	16128897 GI:16128897	ASAP:ABE-0003162|UniProtKB/Swiss-Prot:P0A8M0|EcoGene:EG10094|GeneID:945555|						GCF_000005845.2_ASM584v2_genomic_29-OCT-2014 _iRT	>gi|16128897 GI:16128897|ASAP:ABE-0003162|UniProtKB/Swiss-Prot:P0A8M0|EcoGene:EG10094|GeneID:945555|
3	_VDFDKDFFGK_	_VDFDKDFFGK_	VDFDKDFFGK	51.3436	16128897 GI:16128897	TRUE	_VDFDKDFFGK_	406.533	NH3	5	y	1	596.271	5.27367	TRUE	gi	16128897 GI:16128897	16128897 GI:16128897	ASAP:ABE-0003162|UniProtKB/Swiss-Prot:P0A8M0|EcoGene:EG10094|GeneID:945555|						GCF_000005845.2_ASM584v2_genomic_29-OCT-2014 _iRT	>gi|16128897 GI:16128897|ASAP:ABE-0003162|UniProtKB/Swiss-Prot:P0A8M0|EcoGene:EG10094|GeneID:945555|
3	_VDFDKDFFGK_	_VDFDKDFFGK_	VDFDKDFFGK	51.3436	16128897 GI:16128897	TRUE	_VDFDKDFFGK_	406.533	noloss	5	y	1	613.298	93.5353	FALSE	gi	16128897 GI:16128897	16128897 GI:16128897	ASAP:ABE-0003162|UniProtKB/Swiss-Prot:P0A8M0|EcoGene:EG10094|GeneID:945555|						GCF_000005845.2_ASM584v2_genomic_29-OCT-2014 _iRT	>gi|16128897 GI:16128897|ASAP:ABE-0003162|UniProtKB/Swiss-Prot:P0A8M0|EcoGene:EG10094|GeneID:945555|
3	_VDFDKDFFGK_	_VDFDKDFFGK_	VDFDKDFFGK	51.3436	16128897 GI:16128897	TRUE	_VDFDKDFFGK_	406.533	noloss	6	y	1	741.393	72.5753	FALSE	gi	16128897 GI:16128897	16128897 GI:16128897	ASAP:ABE-0003162|UniProtKB/Swiss-Prot:P0A8M0|EcoGene:EG10094|GeneID:945555|						GCF_000005845.2_ASM584v2_genomic_29-OCT-2014 _iRT	>gi|16128897 GI:16128897|ASAP:ABE-0003162|UniProtKB/Swiss-Prot:P0A8M0|EcoGene:EG10094|GeneID:945555|
3	_VDFDKDFFGK_	_VDFDKDFFGK_	VDFDKDFFGK	51.3436	16128897 GI:16128897	TRUE	_VDFDKDFFGK_	406.533	H2O	7	y	1	838.409	13.875	TRUE	gi	16128897 GI:16128897	16128897 GI:16128897	ASAP:ABE-0003162|UniProtKB/Swiss-Prot:P0A8M0|EcoGene:EG10094|GeneID:945555|						GCF_000005845.2_ASM584v2_genomic_29-OCT-2014 _iRT	>gi|16128897 GI:16128897|ASAP:ABE-0003162|UniProtKB/Swiss-Prot:P0A8M0|EcoGene:EG10094|GeneID:945555|
3	_VDFDKDFFGK_	_VDFDKDFFGK_	VDFDKDFFGK	51.3436	16128897 GI:16128897	TRUE	_VDFDKDFFGK_	406.533	NH3	7	y	1	839.393	10.4301	TRUE	gi	16128897 GI:16128897	16128897 GI:16128897	ASAP:ABE-0003162|UniProtKB/Swiss-Prot:P0A8M0|EcoGene:EG10094|GeneID:945555|						GCF_000005845.2_ASM584v2_genomic_29-OCT-2014 _iRT	>gi|16128897 GI:16128897|ASAP:ABE-0003162|UniProtKB/Swiss-Prot:P0A8M0|EcoGene:EG10094|GeneID:945555|
3	_VDFDKDFFGK_	_VDFDKDFFGK_	VDFDKDFFGK	51.3436	16128897 GI:16128897	TRUE	_VDFDKDFFGK_	406.533	noloss	7	y	1	856.42	100	FALSE	gi	16128897 GI:16128897	16128897 GI:16128897	ASAP:ABE-0003162|UniProtKB/Swiss-Prot:P0A8M0|EcoGene:EG10094|GeneID:945555|						GCF_000005845.2_ASM584v2_genomic_29-OCT-2014 _iRT	>gi|16128897 GI:16128897|ASAP:ABE-0003162|UniProtKB/Swiss-Prot:P0A8M0|EcoGene:EG10094|GeneID:945555|
2	_EVVIAGPK_	_EVVIAGPK_	EVVIAGPK	-10.5584	90111520 GI:90111520	TRUE	_EVVIAGPK_	406.747	noloss	3	y	1	301.187	56.2069	FALSE	gi	90111520 GI:90111520	90111520 GI:90111520	ASAP:ABE-0009725|UniProtKB/Swiss-Prot:P0C066|EcoGene:EG12986|GeneID:945428|						GCF_000005845.2_ASM584v2_genomic_29-OCT-2014 _iRT	>gi|90111520 GI:90111520|ASAP:ABE-0009725|UniProtKB/Swiss-Prot:P0C066|EcoGene:EG12986|GeneID:945428|
2	_EVVIAGPK_	_EVVIAGPK_	EVVIAGPK	-10.5584	90111520 GI:90111520	TRUE	_EVVIAGPK_	406.747	H2O	3	b	1	310.176	18.5122	FALSE	gi	90111520 GI:90111520	90111520 GI:90111520	ASAP:ABE-0009725|UniProtKB/Swiss-Prot:P0C066|EcoGene:EG12986|GeneID:945428|						GCF_000005845.2_ASM584v2_genomic_29-OCT-2014 _iRT	>gi|90111520 GI:90111520|ASAP:ABE-0009725|UniProtKB/Swiss-Prot:P0C066|EcoGene:EG12986|GeneID:945428|
2	_EVVIAGPK_	_EVVIAGPK_	EVVIAGPK	-10.5584	90111520 GI:90111520	TRUE	_EVVIAGPK_	406.747	noloss	4	y	1	372.224	100	FALSE	gi	90111520 GI:90111520	90111520 GI:90111520	ASAP:ABE-0009725|UniProtKB/Swiss-Prot:P0C066|EcoGene:EG12986|GeneID:945428|						GCF_000005845.2_ASM584v2_genomic_29-OCT-2014 _iRT	>gi|90111520 GI:90111520|ASAP:ABE-0009725|UniProtKB/Swiss-Prot:P0C066|EcoGene:EG12986|GeneID:945428|
2	_EVVIAGPK_	_EVVIAGPK_	EVVIAGPK	-10.5584	90111520 GI:90111520	TRUE	_EVVIAGPK_	406.747	noloss	5	y	1	485.308	65.0796	FALSE	gi	90111520 GI:90111520	90111520 GI:90111520	ASAP:ABE-0009725|UniProtKB/Swiss-Prot:P0C066|EcoGene:EG12986|GeneID:945428|						GCF_000005845.2_ASM584v2_genomic_29-OCT-2014 _iRT	>gi|90111520 GI:90111520|ASAP:ABE-0009725|UniProtKB/Swiss-Prot:P0C066|EcoGene:EG12986|GeneID:945428|
2	_EVVIAGPK_	_EVVIAGPK_	EVVIAGPK	-10.5584	90111520 GI:90111520	TRUE	_EVVIAGPK_	406.747	noloss	6	y	1	584.377	61.6141	FALSE	gi	90111520 GI:90111520	90111520 GI:90111520	ASAP:ABE-0009725|UniProtKB/Swiss-Prot:P0C066|EcoGene:EG12986|GeneID:945428|						GCF_000005845.2_ASM584v2_genomic_29-OCT-2014 _iRT	>gi|90111520 GI:90111520|ASAP:ABE-0009725|UniProtKB/Swiss-Prot:P0C066|EcoGene:EG12986|GeneID:945428|
2	_GGLDPLLK_	_GGLDPLLK_	GGLDPLLK	29.4333	16131481 GI:16131481	TRUE	_GGLDPLLK_	406.747	noloss	3	y	1	373.281	9.90602	FALSE	gi	16131481 GI:16131481	16131481 GI:16131481	ASAP:ABE-0011801|UniProtKB/Swiss-Prot:P0AC62|EcoGene:EG12294|GeneID:948132|						GCF_000005845.2_ASM584v2_genomic_29-OCT-2014 _iRT	>gi|16131481 GI:16131481|ASAP:ABE-0011801|UniProtKB/Swiss-Prot:P0AC62|EcoGene:EG12294|GeneID:948132|
2	_GGLDPLLK_	_GGLDPLLK_	GGLDPLLK	29.4333	16131481 GI:16131481	TRUE	_GGLDPLLK_	406.747	noloss	4	y	1	470.334	100	FALSE	gi	16131481 GI:16131481	16131481 GI:16131481	ASAP:ABE-0011801|UniProtKB/Swiss-Prot:P0AC62|EcoGene:EG12294|GeneID:948132|						GCF_000005845.2_ASM584v2_genomic_29-OCT-2014 _iRT	>gi|16131481 GI:16131481|ASAP:ABE-0011801|UniProtKB/Swiss-Prot:P0AC62|EcoGene:EG12294|GeneID:948132|
2	_GGLDPLLK_	_GGLDPLLK_	GGLDPLLK	29.4333	16131481 GI:16131481	TRUE	_GGLDPLLK_	406.747	noloss	5	y	1	585.361	36.5987	FALSE	gi	16131481 GI:16131481	16131481 GI:16131481	ASAP:ABE-0011801|UniProtKB/Swiss-Prot:P0AC62|EcoGene:EG12294|GeneID:948132|						GCF_000005845.2_ASM584v2_genomic_29-OCT-2014 _iRT	>gi|16131481 GI:16131481|ASAP:ABE-0011801|UniProtKB/Swiss-Prot:P0AC62|EcoGene:EG12294|GeneID:948132|
2	_GGLDPLLK_	_GGLDPLLK_	GGLDPLLK	29.4333	16131481 GI:16131481	TRUE	_GGLDPLLK_	406.747	noloss	6	y	1	698.445	6.52064	FALSE	gi	16131481 GI:16131481	16131481 GI:16131481	ASAP:ABE-0011801|UniProtKB/Swiss-Prot:P0AC62|EcoGene:EG12294|GeneID:948132|						GCF_000005845.2_ASM584v2_genomic_29-OCT-2014 _iRT	>gi|16131481 GI:16131481|ASAP:ABE-0011801|UniProtKB/Swiss-Prot:P0AC62|EcoGene:EG12294|GeneID:948132|
3	_EKDGAVEAEDR_	_EKDGAVEAEDR_	EKDGAVEAEDR	-45.6942	16128421 GI:16128421	TRUE	_EKDGAVEAEDR_	406.858	H2O	3	b	1	355.161	15.8245	TRUE	gi	16128421 GI:16128421	16128421 GI:16128421	ASAP:ABE-0001511|UniProtKB/Swiss-Prot:P0A850|EcoGene:EG11003|GeneID:945081|						GCF_000005845.2_ASM584v2_genomic_29-OCT-2014 _iRT	>gi|16128421 GI:16128421|ASAP:ABE-0001511|UniProtKB/Swiss-Prot:P0A850|EcoGene:EG11003|GeneID:945081|
3	_EKDGAVEAEDR_	_EKDGAVEAEDR_	EKDGAVEAEDR	-45.6942	16128421 GI:16128421	TRUE	_EKDGAVEAEDR_	406.858	H2O	7	b	2	356.169	5.57081	TRUE	gi	16128421 GI:16128421	16128421 GI:16128421	ASAP:ABE-0001511|UniProtKB/Swiss-Prot:P0A850|EcoGene:EG11003|GeneID:945081|						GCF_000005845.2_ASM584v2_genomic_29-OCT-2014 _iRT	>gi|16128421 GI:16128421|ASAP:ABE-0001511|UniProtKB/Swiss-Prot:P0A850|EcoGene:EG11003|GeneID:945081|
3	_EKDGAVEAEDR_	_EKDGAVEAEDR_	EKDGAVEAEDR	-45.6942	16128421 GI:16128421	TRUE	_EKDGAVEAEDR_	406.858	H2O	3	y	1	401.178	22.6117	FALSE	gi	16128421 GI:16128421	16128421 GI:16128421	ASAP:ABE-0001511|UniProtKB/Swiss-Prot:P0A850|EcoGene:EG11003|GeneID:945081|						GCF_000005845.2_ASM584v2_genomic_29-OCT-2014 _iRT	>gi|16128421 GI:16128421|ASAP:ABE-0001511|UniProtKB/Swiss-Prot:P0A850|EcoGene:EG11003|GeneID:945081|
3	_EKDGAVEAEDR_	_EKDGAVEAEDR_	EKDGAVEAEDR	-45.6942	16128421 GI:16128421	TRUE	_EKDGAVEAEDR_	406.858	NH3	3	y	1	402.162	6.5122	TRUE	gi	16128421 GI:16128421	16128421 GI:16128421	ASAP:ABE-0001511|UniProtKB/Swiss-Prot:P0A850|EcoGene:EG11003|GeneID:945081|						GCF_000005845.2_ASM584v2_genomic_29-OCT-2014 _iRT	>gi|16128421 GI:16128421|ASAP:ABE-0001511|UniProtKB/Swiss-Prot:P0A850|EcoGene:EG11003|GeneID:945081|
3	_EKDGAVEAEDR_	_EKDGAVEAEDR_	EKDGAVEAEDR	-45.6942	16128421 GI:16128421	TRUE	_EKDGAVEAEDR_	406.858	H2O	4	b	1	412.183	9.30734	TRUE	gi	16128421 GI:16128421	16128421 GI:16128421	ASAP:ABE-0001511|UniProtKB/Swiss-Prot:P0A850|EcoGene:EG11003|GeneID:945081|						GCF_000005845.2_ASM584v2_genomic_29-OCT-2014 _iRT	>gi|16128421 GI:16128421|ASAP:ABE-0001511|UniProtKB/Swiss-Prot:P0A850|EcoGene:EG11003|GeneID:945081|
3	_EKDGAVEAEDR_	_EKDGAVEAEDR_	EKDGAVEAEDR	-45.6942	16128421 GI:16128421	TRUE	_EKDGAVEAEDR_	406.858	noloss	3	y	1	419.188	45.7479	FALSE	gi	16128421 GI:16128421	16128421 GI:16128421	ASAP:ABE-0001511|UniProtKB/Swiss-Prot:P0A850|EcoGene:EG11003|GeneID:945081|						GCF_000005845.2_ASM584v2_genomic_29-OCT-2014 _iRT	>gi|16128421 GI:16128421|ASAP:ABE-0001511|UniProtKB/Swiss-Prot:P0A850|EcoGene:EG11003|GeneID:945081|
3	_EKDGAVEAEDR_	_EKDGAVEAEDR_	EKDGAVEAEDR	-45.6942	16128421 GI:16128421	TRUE	_EKDGAVEAEDR_	406.858	noloss	9	b	2	465.214	9.09282	TRUE	gi	16128421 GI:16128421	16128421 GI:16128421	ASAP:ABE-0001511|UniProtKB/Swiss-Prot:P0A850|EcoGene:EG11003|GeneID:945081|						GCF_000005845.2_ASM584v2_genomic_29-OCT-2014 _iRT	>gi|16128421 GI:16128421|ASAP:ABE-0001511|UniProtKB/Swiss-Prot:P0A850|EcoGene:EG11003|GeneID:945081|
3	_EKDGAVEAEDR_	_EKDGAVEAEDR_	EKDGAVEAEDR	-45.6942	16128421 GI:16128421	TRUE	_EKDGAVEAEDR_	406.858	H2O	5	b	1	483.22	33.7432	FALSE	gi	16128421 GI:16128421	16128421 GI:16128421	ASAP:ABE-0001511|UniProtKB/Swiss-Prot:P0A850|EcoGene:EG11003|GeneID:945081|						GCF_000005845.2_ASM584v2_genomic_29-OCT-2014 _iRT	>gi|16128421 GI:16128421|ASAP:ABE-0001511|UniProtKB/Swiss-Prot:P0A850|EcoGene:EG11003|GeneID:945081|
3	_EKDGAVEAEDR_	_EKDGAVEAEDR_	EKDGAVEAEDR	-45.6942	16128421 GI:16128421	TRUE	_EKDGAVEAEDR_	406.858	noloss	4	y	1	490.226	100	FALSE	gi	16128421 GI:16128421	16128421 GI:16128421	ASAP:ABE-0001511|UniProtKB/Swiss-Prot:P0A850|EcoGene:EG11003|GeneID:945081|						GCF_000005845.2_ASM584v2_genomic_29-OCT-2014 _iRT	>gi|16128421 GI:16128421|ASAP:ABE-0001511|UniProtKB/Swiss-Prot:P0A850|EcoGene:EG11003|GeneID:945081|
3	_EKDGAVEAEDR_	_EKDGAVEAEDR_	EKDGAVEAEDR	-45.6942	16128421 GI:16128421	TRUE	_EKDGAVEAEDR_	406.858	noloss	5	b	1	501.23	11.1873	TRUE	gi	16128421 GI:16128421	16128421 GI:16128421	ASAP:ABE-0001511|UniProtKB/Swiss-Prot:P0A850|EcoGene:EG11003|GeneID:945081|						GCF_000005845.2_ASM584v2_genomic_29-OCT-2014 _iRT	>gi|16128421 GI:16128421|ASAP:ABE-0001511|UniProtKB/Swiss-Prot:P0A850|EcoGene:EG11003|GeneID:945081|
3	_EKDGAVEAEDR_	_EKDGAVEAEDR_	EKDGAVEAEDR	-45.6942	16128421 GI:16128421	TRUE	_EKDGAVEAEDR_	406.858	H2O	6	b	1	582.288	9.43256	TRUE	gi	16128421 GI:16128421	16128421 GI:16128421	ASAP:ABE-0001511|UniProtKB/Swiss-Prot:P0A850|EcoGene:EG11003|GeneID:945081|						GCF_000005845.2_ASM584v2_genomic_29-OCT-2014 _iRT	>gi|16128421 GI:16128421|ASAP:ABE-0001511|UniProtKB/Swiss-Prot:P0A850|EcoGene:EG11003|GeneID:945081|
3	_EKDGAVEAEDR_	_EKDGAVEAEDR_	EKDGAVEAEDR	-45.6942	16128421 GI:16128421	TRUE	_EKDGAVEAEDR_	406.858	noloss	6	b	1	600.299	7.44966	TRUE	gi	16128421 GI:16128421	16128421 GI:16128421	ASAP:ABE-0001511|UniProtKB/Swiss-Prot:P0A850|EcoGene:EG11003|GeneID:945081|						GCF_000005845.2_ASM584v2_genomic_29-OCT-2014 _iRT	>gi|16128421 GI:16128421|ASAP:ABE-0001511|UniProtKB/Swiss-Prot:P0A850|EcoGene:EG11003|GeneID:945081|
3	_EKDGAVEAEDR_	_EKDGAVEAEDR_	EKDGAVEAEDR	-45.6942	16128421 GI:16128421	TRUE	_EKDGAVEAEDR_	406.858	H2O	5	y	1	601.258	43.6857	FALSE	gi	16128421 GI:16128421	16128421 GI:16128421	ASAP:ABE-0001511|UniProtKB/Swiss-Prot:P0A850|EcoGene:EG11003|GeneID:945081|						GCF_000005845.2_ASM584v2_genomic_29-OCT-2014 _iRT	>gi|16128421 GI:16128421|ASAP:ABE-0001511|UniProtKB/Swiss-Prot:P0A850|EcoGene:EG11003|GeneID:945081|
3	_EKDGAVEAEDR_	_EKDGAVEAEDR_	EKDGAVEAEDR	-45.6942	16128421 GI:16128421	TRUE	_EKDGAVEAEDR_	406.858	NH3	5	y	1	602.242	14.1319	TRUE	gi	16128421 GI:16128421	16128421 GI:16128421	ASAP:ABE-0001511|UniProtKB/Swiss-Prot:P0A850|EcoGene:EG11003|GeneID:945081|						GCF_000005845.2_ASM584v2_genomic_29-OCT-2014 _iRT	>gi|16128421 GI:16128421|ASAP:ABE-0001511|UniProtKB/Swiss-Prot:P0A850|EcoGene:EG11003|GeneID:945081|
3	_EKDGAVEAEDR_	_EKDGAVEAEDR_	EKDGAVEAEDR	-45.6942	16128421 GI:16128421	TRUE	_EKDGAVEAEDR_	406.858	noloss	5	y	1	619.268	71.1774	FALSE	gi	16128421 GI:16128421	16128421 GI:16128421	ASAP:ABE-0001511|UniProtKB/Swiss-Prot:P0A850|EcoGene:EG11003|GeneID:945081|						GCF_000005845.2_ASM584v2_genomic_29-OCT-2014 _iRT	>gi|16128421 GI:16128421|ASAP:ABE-0001511|UniProtKB/Swiss-Prot:P0A850|EcoGene:EG11003|GeneID:945081|
3	_EHLAAMDYLR_	_EHLAAMDYLR_	EHLAAMDYLR	36.2946	16128091 GI:16128091	TRUE	_EHLAAMDYLR_	406.869	H2O	3	b	1	362.182	24.4655	TRUE	gi	16128091 GI:16128091	16128091 GI:16128091	ASAP:ABE-0000343|UniProtKB/Swiss-Prot:P10408|EcoGene:EG10936|GeneID:944821|						GCF_000005845.2_ASM584v2_genomic_29-OCT-2014 _iRT	>gi|16128091 GI:16128091|ASAP:ABE-0000343|UniProtKB/Swiss-Prot:P10408|EcoGene:EG10936|GeneID:944821|
3	_EHLAAMDYLR_	_EHLAAMDYLR_	EHLAAMDYLR	36.2946	16128091 GI:16128091	TRUE	_EHLAAMDYLR_	406.869	NH3	3	b	1	363.166	41.3594	FALSE	gi	16128091 GI:16128091	16128091 GI:16128091	ASAP:ABE-0000343|UniProtKB/Swiss-Prot:P10408|EcoGene:EG10936|GeneID:944821|						GCF_000005845.2_ASM584v2_genomic_29-OCT-2014 _iRT	>gi|16128091 GI:16128091|ASAP:ABE-0000343|UniProtKB/Swiss-Prot:P10408|EcoGene:EG10936|GeneID:944821|
3	_EHLAAMDYLR_	_EHLAAMDYLR_	EHLAAMDYLR	36.2946	16128091 GI:16128091	TRUE	_EHLAAMDYLR_	406.869	noloss	3	b	1	380.193	52.1072	FALSE	gi	16128091 GI:16128091	16128091 GI:16128091	ASAP:ABE-0000343|UniProtKB/Swiss-Prot:P10408|EcoGene:EG10936|GeneID:944821|						GCF_000005845.2_ASM584v2_genomic_29-OCT-2014 _iRT	>gi|16128091 GI:16128091|ASAP:ABE-0000343|UniProtKB/Swiss-Prot:P10408|EcoGene:EG10936|GeneID:944821|
3	_EHLAAMDYLR_	_EHLAAMDYLR_	EHLAAMDYLR	36.2946	16128091 GI:16128091	TRUE	_EHLAAMDYLR_	406.869	H2O	4	b	1	433.219	24.6569	FALSE	gi	16128091 GI:16128091	16128091 GI:16128091	ASAP:ABE-0000343|UniProtKB/Swiss-Prot:P10408|EcoGene:EG10936|GeneID:944821|						GCF_000005845.2_ASM584v2_genomic_29-OCT-2014 _iRT	>gi|16128091 GI:16128091|ASAP:ABE-0000343|UniProtKB/Swiss-Prot:P10408|EcoGene:EG10936|GeneID:944821|
3	_EHLAAMDYLR_	_EHLAAMDYLR_	EHLAAMDYLR	36.2946	16128091 GI:16128091	TRUE	_EHLAAMDYLR_	406.869	NH3	3	y	1	434.24	8.26421	TRUE	gi	16128091 GI:16128091	16128091 GI:16128091	ASAP:ABE-0000343|UniProtKB/Swiss-Prot:P10408|EcoGene:EG10936|GeneID:944821|						GCF_000005845.2_ASM584v2_genomic_29-OCT-2014 _iRT	>gi|16128091 GI:16128091|ASAP:ABE-0000343|UniProtKB/Swiss-Prot:P10408|EcoGene:EG10936|GeneID:944821|
3	_EHLAAMDYLR_	_EHLAAMDYLR_	EHLAAMDYLR	36.2946	16128091 GI:16128091	TRUE	_EHLAAMDYLR_	406.869	noloss	3	y	1	451.266	59.859	FALSE	gi	16128091 GI:16128091	16128091 GI:16128091	ASAP:ABE-0000343|UniProtKB/Swiss-Prot:P10408|EcoGene:EG10936|GeneID:944821|						GCF_000005845.2_ASM584v2_genomic_29-OCT-2014 _iRT	>gi|16128091 GI:16128091|ASAP:ABE-0000343|UniProtKB/Swiss-Prot:P10408|EcoGene:EG10936|GeneID:944821|
3	_EHLAAMDYLR_	_EHLAAMDYLR_	EHLAAMDYLR	36.2946	16128091 GI:16128091	TRUE	_EHLAAMDYLR_	406.869	H2O	5	b	1	504.257	9.92666	TRUE	gi	16128091 GI:16128091	16128091 GI:16128091	ASAP:ABE-0000343|UniProtKB/Swiss-Prot:P10408|EcoGene:EG10936|GeneID:944821|						GCF_000005845.2_ASM584v2_genomic_29-OCT-2014 _iRT	>gi|16128091 GI:16128091|ASAP:ABE-0000343|UniProtKB/Swiss-Prot:P10408|EcoGene:EG10936|GeneID:944821|
3	_EHLAAMDYLR_	_EHLAAMDYLR_	EHLAAMDYLR	36.2946	16128091 GI:16128091	TRUE	_EHLAAMDYLR_	406.869	noloss	5	b	1	522.267	49.7848	FALSE	gi	16128091 GI:16128091	16128091 GI:16128091	ASAP:ABE-0000343|UniProtKB/Swiss-Prot:P10408|EcoGene:EG10936|GeneID:944821|						GCF_000005845.2_ASM584v2_genomic_29-OCT-2014 _iRT	>gi|16128091 GI:16128091|ASAP:ABE-0000343|UniProtKB/Swiss-Prot:P10408|EcoGene:EG10936|GeneID:944821|
3	_EHLAAMDYLR_	_EHLAAMDYLR_	EHLAAMDYLR	36.2946	16128091 GI:16128091	TRUE	_EHLAAMDYLR_	406.869	H2O	4	y	1	548.283	11.1939	TRUE	gi	16128091 GI:16128091	16128091 GI:16128091	ASAP:ABE-0000343|UniProtKB/Swiss-Prot:P10408|EcoGene:EG10936|GeneID:944821|						GCF_000005845.2_ASM584v2_genomic_29-OCT-2014 _iRT	>gi|16128091 GI:16128091|ASAP:ABE-0000343|UniProtKB/Swiss-Prot:P10408|EcoGene:EG10936|GeneID:944821|
3	_EHLAAMDYLR_	_EHLAAMDYLR_	EHLAAMDYLR	36.2946	16128091 GI:16128091	TRUE	_EHLAAMDYLR_	406.869	NH3	4	y	1	549.267	7.4364	TRUE	gi	16128091 GI:16128091	16128091 GI:16128091	ASAP:ABE-0000343|UniProtKB/Swiss-Prot:P10408|EcoGene:EG10936|GeneID:944821|						GCF_000005845.2_ASM584v2_genomic_29-OCT-2014 _iRT	>gi|16128091 GI:16128091|ASAP:ABE-0000343|UniProtKB/Swiss-Prot:P10408|EcoGene:EG10936|GeneID:944821|
3	_EHLAAMDYLR_	_EHLAAMDYLR_	EHLAAMDYLR	36.2946	16128091 GI:16128091	TRUE	_EHLAAMDYLR_	406.869	noloss	4	y	1	566.293	100	FALSE	gi	16128091 GI:16128091	16128091 GI:16128091	ASAP:ABE-0000343|UniProtKB/Swiss-Prot:P10408|EcoGene:EG10936|GeneID:944821|						GCF_000005845.2_ASM584v2_genomic_29-OCT-2014 _iRT	>gi|16128091 GI:16128091|ASAP:ABE-0000343|UniProtKB/Swiss-Prot:P10408|EcoGene:EG10936|GeneID:944821|
3	_EHLAAMDYLR_	_EHLAAMDYLR_	EHLAAMDYLR	36.2946	16128091 GI:16128091	TRUE	_EHLAAMDYLR_	406.869	noloss	5	y	1	697.334	9.91952	TRUE	gi	16128091 GI:16128091	16128091 GI:16128091	ASAP:ABE-0000343|UniProtKB/Swiss-Prot:P10408|EcoGene:EG10936|GeneID:944821|						GCF_000005845.2_ASM584v2_genomic_29-OCT-2014 _iRT	>gi|16128091 GI:16128091|ASAP:ABE-0000343|UniProtKB/Swiss-Prot:P10408|EcoGene:EG10936|GeneID:944821|
2	_DIPLLSR_	_DIPLLSR_	DIPLLSR	39.0541	16129094 GI:16129094	TRUE	_DIPLLSR_	407.245	noloss	3	y	1	375.235	65.5877	FALSE	gi	16129094 GI:16129094	16129094 GI:16129094	ASAP:ABE-0003810|UniProtKB/Swiss-Prot:P0AB89|EcoGene:EG11314|GeneID:945695|						GCF_000005845.2_ASM584v2_genomic_29-OCT-2014 _iRT	>gi|16129094 GI:16129094|ASAP:ABE-0003810|UniProtKB/Swiss-Prot:P0AB89|EcoGene:EG11314|GeneID:945695|
2	_DIPLLSR_	_DIPLLSR_	DIPLLSR	39.0541	16129094 GI:16129094	TRUE	_DIPLLSR_	407.245	noloss	4	y	1	488.319	63.2871	FALSE	gi	16129094 GI:16129094	16129094 GI:16129094	ASAP:ABE-0003810|UniProtKB/Swiss-Prot:P0AB89|EcoGene:EG11314|GeneID:945695|						GCF_000005845.2_ASM584v2_genomic_29-OCT-2014 _iRT	>gi|16129094 GI:16129094|ASAP:ABE-0003810|UniProtKB/Swiss-Prot:P0AB89|EcoGene:EG11314|GeneID:945695|
2	_DIPLLSR_	_DIPLLSR_	DIPLLSR	39.0541	16129094 GI:16129094	TRUE	_DIPLLSR_	407.245	NH3	5	y	1	568.345	5.88892	FALSE	gi	16129094 GI:16129094	16129094 GI:16129094	ASAP:ABE-0003810|UniProtKB/Swiss-Prot:P0AB89|EcoGene:EG11314|GeneID:945695|						GCF_000005845.2_ASM584v2_genomic_29-OCT-2014 _iRT	>gi|16129094 GI:16129094|ASAP:ABE-0003810|UniProtKB/Swiss-Prot:P0AB89|EcoGene:EG11314|GeneID:945695|
2	_DIPLLSR_	_DIPLLSR_	DIPLLSR	39.0541	16129094 GI:16129094	TRUE	_DIPLLSR_	407.245	noloss	5	y	1	585.372	100	FALSE	gi	16129094 GI:16129094	16129094 GI:16129094	ASAP:ABE-0003810|UniProtKB/Swiss-Prot:P0AB89|EcoGene:EG11314|GeneID:945695|						GCF_000005845.2_ASM584v2_genomic_29-OCT-2014 _iRT	>gi|16129094 GI:16129094|ASAP:ABE-0003810|UniProtKB/Swiss-Prot:P0AB89|EcoGene:EG11314|GeneID:945695|
2	_IVQDPSR_	_IVQDPSR_	IVQDPSR	-39.6406	16128616 GI:16128616	TRUE	_IVQDPSR_	407.725	H2O	3	y	1	341.193	5.35741	TRUE	gi	16128616 GI:16128616	16128616 GI:16128616	ASAP:ABE-0002171|UniProtKB/Swiss-Prot:P10100|EcoGene:EG10854|GeneID:945241|						GCF_000005845.2_ASM584v2_genomic_29-OCT-2014 _iRT	>gi|16128616 GI:16128616|ASAP:ABE-0002171|UniProtKB/Swiss-Prot:P10100|EcoGene:EG10854|GeneID:945241|
2	_IVQDPSR_	_IVQDPSR_	IVQDPSR	-39.6406	16128616 GI:16128616	TRUE	_IVQDPSR_	407.725	NH3	3	y	1	342.177	12.2194	FALSE	gi	16128616 GI:16128616	16128616 GI:16128616	ASAP:ABE-0002171|UniProtKB/Swiss-Prot:P10100|EcoGene:EG10854|GeneID:945241|						GCF_000005845.2_ASM584v2_genomic_29-OCT-2014 _iRT	>gi|16128616 GI:16128616|ASAP:ABE-0002171|UniProtKB/Swiss-Prot:P10100|EcoGene:EG10854|GeneID:945241|
2	_IVQDPSR_	_IVQDPSR_	IVQDPSR	-39.6406	16128616 GI:16128616	TRUE	_IVQDPSR_	407.725	noloss	6	y	2	351.182	5.02646	TRUE	gi	16128616 GI:16128616	16128616 GI:16128616	ASAP:ABE-0002171|UniProtKB/Swiss-Prot:P10100|EcoGene:EG10854|GeneID:945241|						GCF_000005845.2_ASM584v2_genomic_29-OCT-2014 _iRT	>gi|16128616 GI:16128616|ASAP:ABE-0002171|UniProtKB/Swiss-Prot:P10100|EcoGene:EG10854|GeneID:945241|
2	_IVQDPSR_	_IVQDPSR_	IVQDPSR	-39.6406	16128616 GI:16128616	TRUE	_IVQDPSR_	407.725	noloss	3	y	1	359.204	100	FALSE	gi	16128616 GI:16128616	16128616 GI:16128616	ASAP:ABE-0002171|UniProtKB/Swiss-Prot:P10100|EcoGene:EG10854|GeneID:945241|						GCF_000005845.2_ASM584v2_genomic_29-OCT-2014 _iRT	>gi|16128616 GI:16128616|ASAP:ABE-0002171|UniProtKB/Swiss-Prot:P10100|EcoGene:EG10854|GeneID:945241|
2	_IVQDPSR_	_IVQDPSR_	IVQDPSR	-39.6406	16128616 GI:16128616	TRUE	_IVQDPSR_	407.725	noloss	4	y	1	474.231	8.22366	FALSE	gi	16128616 GI:16128616	16128616 GI:16128616	ASAP:ABE-0002171|UniProtKB/Swiss-Prot:P10100|EcoGene:EG10854|GeneID:945241|						GCF_000005845.2_ASM584v2_genomic_29-OCT-2014 _iRT	>gi|16128616 GI:16128616|ASAP:ABE-0002171|UniProtKB/Swiss-Prot:P10100|EcoGene:EG10854|GeneID:945241|
2	_IVQDPSR_	_IVQDPSR_	IVQDPSR	-39.6406	16128616 GI:16128616	TRUE	_IVQDPSR_	407.725	NH3	5	y	1	585.263	7.1613	FALSE	gi	16128616 GI:16128616	16128616 GI:16128616	ASAP:ABE-0002171|UniProtKB/Swiss-Prot:P10100|EcoGene:EG10854|GeneID:945241|						GCF_000005845.2_ASM584v2_genomic_29-OCT-2014 _iRT	>gi|16128616 GI:16128616|ASAP:ABE-0002171|UniProtKB/Swiss-Prot:P10100|EcoGene:EG10854|GeneID:945241|
2	_IVQDPSR_	_IVQDPSR_	IVQDPSR	-39.6406	16128616 GI:16128616	TRUE	_IVQDPSR_	407.725	noloss	5	y	1	602.289	31.6098	FALSE	gi	16128616 GI:16128616	16128616 GI:16128616	ASAP:ABE-0002171|UniProtKB/Swiss-Prot:P10100|EcoGene:EG10854|GeneID:945241|						GCF_000005845.2_ASM584v2_genomic_29-OCT-2014 _iRT	>gi|16128616 GI:16128616|ASAP:ABE-0002171|UniProtKB/Swiss-Prot:P10100|EcoGene:EG10854|GeneID:945241|
2	_IVQDPSR_	_IVQDPSR_	IVQDPSR	-39.6406	16128616 GI:16128616	TRUE	_IVQDPSR_	407.725	noloss	6	y	1	701.358	14.265	FALSE	gi	16128616 GI:16128616	16128616 GI:16128616	ASAP:ABE-0002171|UniProtKB/Swiss-Prot:P10100|EcoGene:EG10854|GeneID:945241|						GCF_000005845.2_ASM584v2_genomic_29-OCT-2014 _iRT	>gi|16128616 GI:16128616|ASAP:ABE-0002171|UniProtKB/Swiss-Prot:P10100|EcoGene:EG10854|GeneID:945241|
2	_LPPGFQR_	_LPPGFQR_	LPPGFQR	2.07274	16130251 GI:16130251	TRUE	_LPPGFQR_	407.732	noloss	5	y	2	302.664	22.6955	FALSE	gi	16130251 GI:16130251	16130251 GI:16130251	ASAP:ABE-0007648|UniProtKB/Swiss-Prot:P0A9Q5|EcoGene:EG10217|GeneID:946796|						GCF_000005845.2_ASM584v2_genomic_29-OCT-2014 _iRT	>gi|16130251 GI:16130251|ASAP:ABE-0007648|UniProtKB/Swiss-Prot:P0A9Q5|EcoGene:EG10217|GeneID:946796|
2	_LPPGFQR_	_LPPGFQR_	LPPGFQR	2.07274	16130251 GI:16130251	TRUE	_LPPGFQR_	407.732	noloss	6	y	2	351.19	28.0024	FALSE	gi	16130251 GI:16130251	16130251 GI:16130251	ASAP:ABE-0007648|UniProtKB/Swiss-Prot:P0A9Q5|EcoGene:EG10217|GeneID:946796|						GCF_000005845.2_ASM584v2_genomic_29-OCT-2014 _iRT	>gi|16130251 GI:16130251|ASAP:ABE-0007648|UniProtKB/Swiss-Prot:P0A9Q5|EcoGene:EG10217|GeneID:946796|
2	_LPPGFQR_	_LPPGFQR_	LPPGFQR	2.07274	16130251 GI:16130251	TRUE	_LPPGFQR_	407.732	noloss	4	y	1	507.267	12.1677	FALSE	gi	16130251 GI:16130251	16130251 GI:16130251	ASAP:ABE-0007648|UniProtKB/Swiss-Prot:P0A9Q5|EcoGene:EG10217|GeneID:946796|						GCF_000005845.2_ASM584v2_genomic_29-OCT-2014 _iRT	>gi|16130251 GI:16130251|ASAP:ABE-0007648|UniProtKB/Swiss-Prot:P0A9Q5|EcoGene:EG10217|GeneID:946796|
2	_LPPGFQR_	_LPPGFQR_	LPPGFQR	2.07274	16130251 GI:16130251	TRUE	_LPPGFQR_	407.732	noloss	5	y	1	604.32	100	FALSE	gi	16130251 GI:16130251	16130251 GI:16130251	ASAP:ABE-0007648|UniProtKB/Swiss-Prot:P0A9Q5|EcoGene:EG10217|GeneID:946796|						GCF_000005845.2_ASM584v2_genomic_29-OCT-2014 _iRT	>gi|16130251 GI:16130251|ASAP:ABE-0007648|UniProtKB/Swiss-Prot:P0A9Q5|EcoGene:EG10217|GeneID:946796|
2	_LPPGFQR_	_LPPGFQR_	LPPGFQR	2.07274	16130251 GI:16130251	TRUE	_LPPGFQR_	407.732	noloss	6	y	1	701.373	11.8371	FALSE	gi	16130251 GI:16130251	16130251 GI:16130251	ASAP:ABE-0007648|UniProtKB/Swiss-Prot:P0A9Q5|EcoGene:EG10217|GeneID:946796|						GCF_000005845.2_ASM584v2_genomic_29-OCT-2014 _iRT	>gi|16130251 GI:16130251|ASAP:ABE-0007648|UniProtKB/Swiss-Prot:P0A9Q5|EcoGene:EG10217|GeneID:946796|
4	_IAIAPDDIAITLHHK_	_IAIAPDDIAITLHHK_	IAIAPDDIAITLHHK	43.7109	16130190 GI:16130190	TRUE	_IAIAPDDIAITLHHK_	407.735	H2O	11	y	4	311.171	5.10733	TRUE	gi	16130190 GI:16130190	16130190 GI:16130190	ASAP:ABE-0007460|UniProtKB/Swiss-Prot:P77398|EcoGene:EG14091|GeneID:947683|						GCF_000005845.2_ASM584v2_genomic_29-OCT-2014 _iRT	>gi|16130190 GI:16130190|ASAP:ABE-0007460|UniProtKB/Swiss-Prot:P77398|EcoGene:EG14091|GeneID:947683|
4	_IAIAPDDIAITLHHK_	_IAIAPDDIAITLHHK_	IAIAPDDIAITLHHK	43.7109	16130190 GI:16130190	TRUE	_IAIAPDDIAITLHHK_	407.735	noloss	5	y	2	318.185	19.231	TRUE	gi	16130190 GI:16130190	16130190 GI:16130190	ASAP:ABE-0007460|UniProtKB/Swiss-Prot:P77398|EcoGene:EG14091|GeneID:947683|						GCF_000005845.2_ASM584v2_genomic_29-OCT-2014 _iRT	>gi|16130190 GI:16130190|ASAP:ABE-0007460|UniProtKB/Swiss-Prot:P77398|EcoGene:EG14091|GeneID:947683|
4	_IAIAPDDIAITLHHK_	_IAIAPDDIAITLHHK_	IAIAPDDIAITLHHK	43.7109	16130190 GI:16130190	TRUE	_IAIAPDDIAITLHHK_	407.735	noloss	4	b	1	369.25	58.2849	FALSE	gi	16130190 GI:16130190	16130190 GI:16130190	ASAP:ABE-0007460|UniProtKB/Swiss-Prot:P77398|EcoGene:EG14091|GeneID:947683|						GCF_000005845.2_ASM584v2_genomic_29-OCT-2014 _iRT	>gi|16130190 GI:16130190|ASAP:ABE-0007460|UniProtKB/Swiss-Prot:P77398|EcoGene:EG14091|GeneID:947683|
4	_IAIAPDDIAITLHHK_	_IAIAPDDIAITLHHK_	IAIAPDDIAITLHHK	43.7109	16130190 GI:16130190	TRUE	_IAIAPDDIAITLHHK_	407.735	noloss	6	y	2	374.727	19.8342	TRUE	gi	16130190 GI:16130190	16130190 GI:16130190	ASAP:ABE-0007460|UniProtKB/Swiss-Prot:P77398|EcoGene:EG14091|GeneID:947683|						GCF_000005845.2_ASM584v2_genomic_29-OCT-2014 _iRT	>gi|16130190 GI:16130190|ASAP:ABE-0007460|UniProtKB/Swiss-Prot:P77398|EcoGene:EG14091|GeneID:947683|
4	_IAIAPDDIAITLHHK_	_IAIAPDDIAITLHHK_	IAIAPDDIAITLHHK	43.7109	16130190 GI:16130190	TRUE	_IAIAPDDIAITLHHK_	407.735	noloss	10	y	3	388.212	7.42822	TRUE	gi	16130190 GI:16130190	16130190 GI:16130190	ASAP:ABE-0007460|UniProtKB/Swiss-Prot:P77398|EcoGene:EG14091|GeneID:947683|						GCF_000005845.2_ASM584v2_genomic_29-OCT-2014 _iRT	>gi|16130190 GI:16130190|ASAP:ABE-0007460|UniProtKB/Swiss-Prot:P77398|EcoGene:EG14091|GeneID:947683|
4	_IAIAPDDIAITLHHK_	_IAIAPDDIAITLHHK_	IAIAPDDIAITLHHK	43.7109	16130190 GI:16130190	TRUE	_IAIAPDDIAITLHHK_	407.735	noloss	12	b	3	403.236	11.1785	TRUE	gi	16130190 GI:16130190	16130190 GI:16130190	ASAP:ABE-0007460|UniProtKB/Swiss-Prot:P77398|EcoGene:EG14091|GeneID:947683|						GCF_000005845.2_ASM584v2_genomic_29-OCT-2014 _iRT	>gi|16130190 GI:16130190|ASAP:ABE-0007460|UniProtKB/Swiss-Prot:P77398|EcoGene:EG14091|GeneID:947683|
4	_IAIAPDDIAITLHHK_	_IAIAPDDIAITLHHK_	IAIAPDDIAITLHHK	43.7109	16130190 GI:16130190	TRUE	_IAIAPDDIAITLHHK_	407.735	noloss	7	y	2	410.245	29.0048	FALSE	gi	16130190 GI:16130190	16130190 GI:16130190	ASAP:ABE-0007460|UniProtKB/Swiss-Prot:P77398|EcoGene:EG14091|GeneID:947683|						GCF_000005845.2_ASM584v2_genomic_29-OCT-2014 _iRT	>gi|16130190 GI:16130190|ASAP:ABE-0007460|UniProtKB/Swiss-Prot:P77398|EcoGene:EG14091|GeneID:947683|
4	_IAIAPDDIAITLHHK_	_IAIAPDDIAITLHHK_	IAIAPDDIAITLHHK	43.7109	16130190 GI:16130190	TRUE	_IAIAPDDIAITLHHK_	407.735	noloss	3	y	1	421.231	42.9705	FALSE	gi	16130190 GI:16130190	16130190 GI:16130190	ASAP:ABE-0007460|UniProtKB/Swiss-Prot:P77398|EcoGene:EG14091|GeneID:947683|						GCF_000005845.2_ASM584v2_genomic_29-OCT-2014 _iRT	>gi|16130190 GI:16130190|ASAP:ABE-0007460|UniProtKB/Swiss-Prot:P77398|EcoGene:EG14091|GeneID:947683|
4	_IAIAPDDIAITLHHK_	_IAIAPDDIAITLHHK_	IAIAPDDIAITLHHK	43.7109	16130190 GI:16130190	TRUE	_IAIAPDDIAITLHHK_	407.735	H2O	9	y	2	515.296	6.77554	TRUE	gi	16130190 GI:16130190	16130190 GI:16130190	ASAP:ABE-0007460|UniProtKB/Swiss-Prot:P77398|EcoGene:EG14091|GeneID:947683|						GCF_000005845.2_ASM584v2_genomic_29-OCT-2014 _iRT	>gi|16130190 GI:16130190|ASAP:ABE-0007460|UniProtKB/Swiss-Prot:P77398|EcoGene:EG14091|GeneID:947683|
4	_IAIAPDDIAITLHHK_	_IAIAPDDIAITLHHK_	IAIAPDDIAITLHHK	43.7109	16130190 GI:16130190	TRUE	_IAIAPDDIAITLHHK_	407.735	noloss	4	y	1	534.315	21.821	TRUE	gi	16130190 GI:16130190	16130190 GI:16130190	ASAP:ABE-0007460|UniProtKB/Swiss-Prot:P77398|EcoGene:EG14091|GeneID:947683|						GCF_000005845.2_ASM584v2_genomic_29-OCT-2014 _iRT	>gi|16130190 GI:16130190|ASAP:ABE-0007460|UniProtKB/Swiss-Prot:P77398|EcoGene:EG14091|GeneID:947683|
4	_IAIAPDDIAITLHHK_	_IAIAPDDIAITLHHK_	IAIAPDDIAITLHHK	43.7109	16130190 GI:16130190	TRUE	_IAIAPDDIAITLHHK_	407.735	H2O	5	y	1	617.352	14.5536	TRUE	gi	16130190 GI:16130190	16130190 GI:16130190	ASAP:ABE-0007460|UniProtKB/Swiss-Prot:P77398|EcoGene:EG14091|GeneID:947683|						GCF_000005845.2_ASM584v2_genomic_29-OCT-2014 _iRT	>gi|16130190 GI:16130190|ASAP:ABE-0007460|UniProtKB/Swiss-Prot:P77398|EcoGene:EG14091|GeneID:947683|
4	_IAIAPDDIAITLHHK_	_IAIAPDDIAITLHHK_	IAIAPDDIAITLHHK	43.7109	16130190 GI:16130190	TRUE	_IAIAPDDIAITLHHK_	407.735	NH3	5	y	1	618.336	15.6122	TRUE	gi	16130190 GI:16130190	16130190 GI:16130190	ASAP:ABE-0007460|UniProtKB/Swiss-Prot:P77398|EcoGene:EG14091|GeneID:947683|						GCF_000005845.2_ASM584v2_genomic_29-OCT-2014 _iRT	>gi|16130190 GI:16130190|ASAP:ABE-0007460|UniProtKB/Swiss-Prot:P77398|EcoGene:EG14091|GeneID:947683|
4	_IAIAPDDIAITLHHK_	_IAIAPDDIAITLHHK_	IAIAPDDIAITLHHK	43.7109	16130190 GI:16130190	TRUE	_IAIAPDDIAITLHHK_	407.735	noloss	11	y	2	630.341	5.81875	TRUE	gi	16130190 GI:16130190	16130190 GI:16130190	ASAP:ABE-0007460|UniProtKB/Swiss-Prot:P77398|EcoGene:EG14091|GeneID:947683|						GCF_000005845.2_ASM584v2_genomic_29-OCT-2014 _iRT	>gi|16130190 GI:16130190|ASAP:ABE-0007460|UniProtKB/Swiss-Prot:P77398|EcoGene:EG14091|GeneID:947683|
4	_IAIAPDDIAITLHHK_	_IAIAPDDIAITLHHK_	IAIAPDDIAITLHHK	43.7109	16130190 GI:16130190	TRUE	_IAIAPDDIAITLHHK_	407.735	noloss	5	y	1	635.362	100	FALSE	gi	16130190 GI:16130190	16130190 GI:16130190	ASAP:ABE-0007460|UniProtKB/Swiss-Prot:P77398|EcoGene:EG14091|GeneID:947683|						GCF_000005845.2_ASM584v2_genomic_29-OCT-2014 _iRT	>gi|16130190 GI:16130190|ASAP:ABE-0007460|UniProtKB/Swiss-Prot:P77398|EcoGene:EG14091|GeneID:947683|
4	_IAIAPDDIAITLHHK_	_IAIAPDDIAITLHHK_	IAIAPDDIAITLHHK	43.7109	16130190 GI:16130190	TRUE	_IAIAPDDIAITLHHK_	407.735	noloss	7	b	1	696.356	8.29727	TRUE	gi	16130190 GI:16130190	16130190 GI:16130190	ASAP:ABE-0007460|UniProtKB/Swiss-Prot:P77398|EcoGene:EG14091|GeneID:947683|						GCF_000005845.2_ASM584v2_genomic_29-OCT-2014 _iRT	>gi|16130190 GI:16130190|ASAP:ABE-0007460|UniProtKB/Swiss-Prot:P77398|EcoGene:EG14091|GeneID:947683|
4	_IAIAPDDIAITLHHK_	_IAIAPDDIAITLHHK_	IAIAPDDIAITLHHK	43.7109	16130190 GI:16130190	TRUE	_IAIAPDDIAITLHHK_	407.735	noloss	6	y	1	748.446	25.6674	FALSE	gi	16130190 GI:16130190	16130190 GI:16130190	ASAP:ABE-0007460|UniProtKB/Swiss-Prot:P77398|EcoGene:EG14091|GeneID:947683|						GCF_000005845.2_ASM584v2_genomic_29-OCT-2014 _iRT	>gi|16130190 GI:16130190|ASAP:ABE-0007460|UniProtKB/Swiss-Prot:P77398|EcoGene:EG14091|GeneID:947683|
4	_IAIAPDDIAITLHHK_	_IAIAPDDIAITLHHK_	IAIAPDDIAITLHHK	43.7109	16130190 GI:16130190	TRUE	_IAIAPDDIAITLHHK_	407.735	noloss	7	y	1	819.484	27.9091	FALSE	gi	16130190 GI:16130190	16130190 GI:16130190	ASAP:ABE-0007460|UniProtKB/Swiss-Prot:P77398|EcoGene:EG14091|GeneID:947683|						GCF_000005845.2_ASM584v2_genomic_29-OCT-2014 _iRT	>gi|16130190 GI:16130190|ASAP:ABE-0007460|UniProtKB/Swiss-Prot:P77398|EcoGene:EG14091|GeneID:947683|
4	_IAIAPDDIAITLHHK_	_IAIAPDDIAITLHHK_	IAIAPDDIAITLHHK	43.7109	16130190 GI:16130190	TRUE	_IAIAPDDIAITLHHK_	407.735	H2O	5	y	2	309.18	5.73312	TRUE	gi	16130190 GI:16130190	16130190 GI:16130190	ASAP:ABE-0007460|UniProtKB/Swiss-Prot:P77398|EcoGene:EG14091|GeneID:947683|						GCF_000005845.2_ASM584v2_genomic_29-OCT-2014 _iRT	>gi|16130190 GI:16130190|ASAP:ABE-0007460|UniProtKB/Swiss-Prot:P77398|EcoGene:EG14091|GeneID:947683|
4	_IAIAPDDIAITLHHK_	_IAIAPDDIAITLHHK_	IAIAPDDIAITLHHK	43.7109	16130190 GI:16130190	TRUE	_IAIAPDDIAITLHHK_	407.735	NH3	9	y	3	344.194	5.12172	TRUE	gi	16130190 GI:16130190	16130190 GI:16130190	ASAP:ABE-0007460|UniProtKB/Swiss-Prot:P77398|EcoGene:EG14091|GeneID:947683|						GCF_000005845.2_ASM584v2_genomic_29-OCT-2014 _iRT	>gi|16130190 GI:16130190|ASAP:ABE-0007460|UniProtKB/Swiss-Prot:P77398|EcoGene:EG14091|GeneID:947683|
4	_IAIAPDDIAITLHHK_	_IAIAPDDIAITLHHK_	IAIAPDDIAITLHHK	43.7109	16130190 GI:16130190	TRUE	_IAIAPDDIAITLHHK_	407.735	H2O	3	y	1	403.22	7.93296	TRUE	gi	16130190 GI:16130190	16130190 GI:16130190	ASAP:ABE-0007460|UniProtKB/Swiss-Prot:P77398|EcoGene:EG14091|GeneID:947683|						GCF_000005845.2_ASM584v2_genomic_29-OCT-2014 _iRT	>gi|16130190 GI:16130190|ASAP:ABE-0007460|UniProtKB/Swiss-Prot:P77398|EcoGene:EG14091|GeneID:947683|
2	_ISPLQEK_	_ISPLQEK_	ISPLQEK	-16.3627	16127998 GI:16127998	TRUE	_ISPLQEK_	407.737	noloss	5	y	2	307.679	93.6709	FALSE	gi	16127998 GI:16127998	16127998 GI:16127998	ASAP:ABE-0000012|UniProtKB/Swiss-Prot:P00934|EcoGene:EG11000|GeneID:945198|						GCF_000005845.2_ASM584v2_genomic_29-OCT-2014 _iRT	>gi|16127998 GI:16127998|ASAP:ABE-0000012|UniProtKB/Swiss-Prot:P00934|EcoGene:EG11000|GeneID:945198|
2	_ISPLQEK_	_ISPLQEK_	ISPLQEK	-16.3627	16127998 GI:16127998	TRUE	_ISPLQEK_	407.737	H2O	3	y	1	386.203	33.2531	TRUE	gi	16127998 GI:16127998	16127998 GI:16127998	ASAP:ABE-0000012|UniProtKB/Swiss-Prot:P00934|EcoGene:EG11000|GeneID:945198|						GCF_000005845.2_ASM584v2_genomic_29-OCT-2014 _iRT	>gi|16127998 GI:16127998|ASAP:ABE-0000012|UniProtKB/Swiss-Prot:P00934|EcoGene:EG11000|GeneID:945198|
2	_ISPLQEK_	_ISPLQEK_	ISPLQEK	-16.3627	16127998 GI:16127998	TRUE	_ISPLQEK_	407.737	NH3	3	y	1	387.187	51.3755	FALSE	gi	16127998 GI:16127998	16127998 GI:16127998	ASAP:ABE-0000012|UniProtKB/Swiss-Prot:P00934|EcoGene:EG11000|GeneID:945198|						GCF_000005845.2_ASM584v2_genomic_29-OCT-2014 _iRT	>gi|16127998 GI:16127998|ASAP:ABE-0000012|UniProtKB/Swiss-Prot:P00934|EcoGene:EG11000|GeneID:945198|
2	_ISPLQEK_	_ISPLQEK_	ISPLQEK	-16.3627	16127998 GI:16127998	TRUE	_ISPLQEK_	407.737	noloss	3	y	1	404.214	37.2606	FALSE	gi	16127998 GI:16127998	16127998 GI:16127998	ASAP:ABE-0000012|UniProtKB/Swiss-Prot:P00934|EcoGene:EG11000|GeneID:945198|						GCF_000005845.2_ASM584v2_genomic_29-OCT-2014 _iRT	>gi|16127998 GI:16127998|ASAP:ABE-0000012|UniProtKB/Swiss-Prot:P00934|EcoGene:EG11000|GeneID:945198|
2	_ISPLQEK_	_ISPLQEK_	ISPLQEK	-16.3627	16127998 GI:16127998	TRUE	_ISPLQEK_	407.737	H2O	4	y	1	499.287	7.22101	TRUE	gi	16127998 GI:16127998	16127998 GI:16127998	ASAP:ABE-0000012|UniProtKB/Swiss-Prot:P00934|EcoGene:EG11000|GeneID:945198|						GCF_000005845.2_ASM584v2_genomic_29-OCT-2014 _iRT	>gi|16127998 GI:16127998|ASAP:ABE-0000012|UniProtKB/Swiss-Prot:P00934|EcoGene:EG11000|GeneID:945198|
2	_ISPLQEK_	_ISPLQEK_	ISPLQEK	-16.3627	16127998 GI:16127998	TRUE	_ISPLQEK_	407.737	noloss	4	y	1	517.298	75.9044	FALSE	gi	16127998 GI:16127998	16127998 GI:16127998	ASAP:ABE-0000012|UniProtKB/Swiss-Prot:P00934|EcoGene:EG11000|GeneID:945198|						GCF_000005845.2_ASM584v2_genomic_29-OCT-2014 _iRT	>gi|16127998 GI:16127998|ASAP:ABE-0000012|UniProtKB/Swiss-Prot:P00934|EcoGene:EG11000|GeneID:945198|
2	_ISPLQEK_	_ISPLQEK_	ISPLQEK	-16.3627	16127998 GI:16127998	TRUE	_ISPLQEK_	407.737	H2O	5	y	1	596.34	5.14031	TRUE	gi	16127998 GI:16127998	16127998 GI:16127998	ASAP:ABE-0000012|UniProtKB/Swiss-Prot:P00934|EcoGene:EG11000|GeneID:945198|						GCF_000005845.2_ASM584v2_genomic_29-OCT-2014 _iRT	>gi|16127998 GI:16127998|ASAP:ABE-0000012|UniProtKB/Swiss-Prot:P00934|EcoGene:EG11000|GeneID:945198|
2	_ISPLQEK_	_ISPLQEK_	ISPLQEK	-16.3627	16127998 GI:16127998	TRUE	_ISPLQEK_	407.737	noloss	5	y	1	614.351	100	FALSE	gi	16127998 GI:16127998	16127998 GI:16127998	ASAP:ABE-0000012|UniProtKB/Swiss-Prot:P00934|EcoGene:EG11000|GeneID:945198|						GCF_000005845.2_ASM584v2_genomic_29-OCT-2014 _iRT	>gi|16127998 GI:16127998|ASAP:ABE-0000012|UniProtKB/Swiss-Prot:P00934|EcoGene:EG11000|GeneID:945198|
2	_ISPLQEK_	_ISPLQEK_	ISPLQEK	-16.3627	16127998 GI:16127998	TRUE	_ISPLQEK_	407.737	noloss	6	y	1	701.383	48.105	FALSE	gi	16127998 GI:16127998	16127998 GI:16127998	ASAP:ABE-0000012|UniProtKB/Swiss-Prot:P00934|EcoGene:EG11000|GeneID:945198|						GCF_000005845.2_ASM584v2_genomic_29-OCT-2014 _iRT	>gi|16127998 GI:16127998|ASAP:ABE-0000012|UniProtKB/Swiss-Prot:P00934|EcoGene:EG11000|GeneID:945198|
2	_AGVLAEVR_	_AGVLAEVR_	AGVLAEVR	0.322905	16130961 GI:16130961	TRUE	_AGVLAEVR_	407.743	noloss	3	y	1	403.23	34.483	FALSE	gi	16130961 GI:16130961	16130961 GI:16130961	ASAP:ABE-0010063|UniProtKB/Swiss-Prot:P68679|EcoGene:EG10920|GeneID:947577|						GCF_000005845.2_ASM584v2_genomic_29-OCT-2014 _iRT	>gi|16130961 GI:16130961|ASAP:ABE-0010063|UniProtKB/Swiss-Prot:P68679|EcoGene:EG10920|GeneID:947577|
2	_AGVLAEVR_	_AGVLAEVR_	AGVLAEVR	0.322905	16130961 GI:16130961	TRUE	_AGVLAEVR_	407.743	noloss	4	y	1	474.267	84.08	FALSE	gi	16130961 GI:16130961	16130961 GI:16130961	ASAP:ABE-0010063|UniProtKB/Swiss-Prot:P68679|EcoGene:EG10920|GeneID:947577|						GCF_000005845.2_ASM584v2_genomic_29-OCT-2014 _iRT	>gi|16130961 GI:16130961|ASAP:ABE-0010063|UniProtKB/Swiss-Prot:P68679|EcoGene:EG10920|GeneID:947577|
2	_AGVLAEVR_	_AGVLAEVR_	AGVLAEVR	0.322905	16130961 GI:16130961	TRUE	_AGVLAEVR_	407.743	noloss	5	y	1	587.351	100	FALSE	gi	16130961 GI:16130961	16130961 GI:16130961	ASAP:ABE-0010063|UniProtKB/Swiss-Prot:P68679|EcoGene:EG10920|GeneID:947577|						GCF_000005845.2_ASM584v2_genomic_29-OCT-2014 _iRT	>gi|16130961 GI:16130961|ASAP:ABE-0010063|UniProtKB/Swiss-Prot:P68679|EcoGene:EG10920|GeneID:947577|
2	_AGVLAEVR_	_AGVLAEVR_	AGVLAEVR	0.322905	16130961 GI:16130961	TRUE	_AGVLAEVR_	407.743	noloss	6	y	1	686.42	9.13633	FALSE	gi	16130961 GI:16130961	16130961 GI:16130961	ASAP:ABE-0010063|UniProtKB/Swiss-Prot:P68679|EcoGene:EG10920|GeneID:947577|						GCF_000005845.2_ASM584v2_genomic_29-OCT-2014 _iRT	>gi|16130961 GI:16130961|ASAP:ABE-0010063|UniProtKB/Swiss-Prot:P68679|EcoGene:EG10920|GeneID:947577|
2	_AGVLAEVR_	_AGVLAEVR_	AGVLAEVR	0.322905	16130961 GI:16130961	TRUE	_AGVLAEVR_	407.743	noloss	7	y	1	743.441	14.8514	FALSE	gi	16130961 GI:16130961	16130961 GI:16130961	ASAP:ABE-0010063|UniProtKB/Swiss-Prot:P68679|EcoGene:EG10920|GeneID:947577|						GCF_000005845.2_ASM584v2_genomic_29-OCT-2014 _iRT	>gi|16130961 GI:16130961|ASAP:ABE-0010063|UniProtKB/Swiss-Prot:P68679|EcoGene:EG10920|GeneID:947577|
2	_ELIIGDR_	_ELIIGDR_	ELIIGDR	8.52722	16131602 GI:16131602	TRUE	_ELIIGDR_	408.235	NH3	3	y	1	330.141	11.6909	FALSE	gi	16131602 GI:16131602	16131602 GI:16131602	ASAP:ABE-0012213|UniProtKB/Swiss-Prot:P0ABB0|EcoGene:EG10098|GeneID:948242|						GCF_000005845.2_ASM584v2_genomic_29-OCT-2014 _iRT	>gi|16131602 GI:16131602|ASAP:ABE-0012213|UniProtKB/Swiss-Prot:P0ABB0|EcoGene:EG10098|GeneID:948242|
2	_ELIIGDR_	_ELIIGDR_	ELIIGDR	8.52722	16131602 GI:16131602	TRUE	_ELIIGDR_	408.235	noloss	3	y	1	347.167	80.999	FALSE	gi	16131602 GI:16131602	16131602 GI:16131602	ASAP:ABE-0012213|UniProtKB/Swiss-Prot:P0ABB0|EcoGene:EG10098|GeneID:948242|						GCF_000005845.2_ASM584v2_genomic_29-OCT-2014 _iRT	>gi|16131602 GI:16131602|ASAP:ABE-0012213|UniProtKB/Swiss-Prot:P0ABB0|EcoGene:EG10098|GeneID:948242|
2	_ELIIGDR_	_ELIIGDR_	ELIIGDR	8.52722	16131602 GI:16131602	TRUE	_ELIIGDR_	408.235	NH3	4	y	1	443.225	6.86533	FALSE	gi	16131602 GI:16131602	16131602 GI:16131602	ASAP:ABE-0012213|UniProtKB/Swiss-Prot:P0ABB0|EcoGene:EG10098|GeneID:948242|						GCF_000005845.2_ASM584v2_genomic_29-OCT-2014 _iRT	>gi|16131602 GI:16131602|ASAP:ABE-0012213|UniProtKB/Swiss-Prot:P0ABB0|EcoGene:EG10098|GeneID:948242|
2	_ELIIGDR_	_ELIIGDR_	ELIIGDR	8.52722	16131602 GI:16131602	TRUE	_ELIIGDR_	408.235	noloss	4	y	1	460.251	100	FALSE	gi	16131602 GI:16131602	16131602 GI:16131602	ASAP:ABE-0012213|UniProtKB/Swiss-Prot:P0ABB0|EcoGene:EG10098|GeneID:948242|						GCF_000005845.2_ASM584v2_genomic_29-OCT-2014 _iRT	>gi|16131602 GI:16131602|ASAP:ABE-0012213|UniProtKB/Swiss-Prot:P0ABB0|EcoGene:EG10098|GeneID:948242|
2	_ELIIGDR_	_ELIIGDR_	ELIIGDR	8.52722	16131602 GI:16131602	TRUE	_ELIIGDR_	408.235	noloss	5	y	1	573.335	55.4354	FALSE	gi	16131602 GI:16131602	16131602 GI:16131602	ASAP:ABE-0012213|UniProtKB/Swiss-Prot:P0ABB0|EcoGene:EG10098|GeneID:948242|						GCF_000005845.2_ASM584v2_genomic_29-OCT-2014 _iRT	>gi|16131602 GI:16131602|ASAP:ABE-0012213|UniProtKB/Swiss-Prot:P0ABB0|EcoGene:EG10098|GeneID:948242|
2	_ISAGQAIR_	_ISAGQAIR_	ISAGQAIR	-19.338	16129835 GI:16129835	TRUE	_ISAGQAIR_	408.24	H2O	7	b	2	312.179	9.2425	TRUE	gi	16129835 GI:16129835	16129835 GI:16129835	ASAP:ABE-0006284|UniProtKB/Swiss-Prot:P07330|EcoGene:EG10147|GeneID:946394|						GCF_000005845.2_ASM584v2_genomic_29-OCT-2014 _iRT	>gi|16129835 GI:16129835|ASAP:ABE-0006284|UniProtKB/Swiss-Prot:P07330|EcoGene:EG10147|GeneID:946394|
2	_ISAGQAIR_	_ISAGQAIR_	ISAGQAIR	-19.338	16129835 GI:16129835	TRUE	_ISAGQAIR_	408.24	NH3	3	y	1	342.214	11.4604	FALSE	gi	16129835 GI:16129835	16129835 GI:16129835	ASAP:ABE-0006284|UniProtKB/Swiss-Prot:P07330|EcoGene:EG10147|GeneID:946394|						GCF_000005845.2_ASM584v2_genomic_29-OCT-2014 _iRT	>gi|16129835 GI:16129835|ASAP:ABE-0006284|UniProtKB/Swiss-Prot:P07330|EcoGene:EG10147|GeneID:946394|
2	_ISAGQAIR_	_ISAGQAIR_	ISAGQAIR	-19.338	16129835 GI:16129835	TRUE	_ISAGQAIR_	408.24	noloss	3	y	1	359.24	58.095	FALSE	gi	16129835 GI:16129835	16129835 GI:16129835	ASAP:ABE-0006284|UniProtKB/Swiss-Prot:P07330|EcoGene:EG10147|GeneID:946394|						GCF_000005845.2_ASM584v2_genomic_29-OCT-2014 _iRT	>gi|16129835 GI:16129835|ASAP:ABE-0006284|UniProtKB/Swiss-Prot:P07330|EcoGene:EG10147|GeneID:946394|
2	_ISAGQAIR_	_ISAGQAIR_	ISAGQAIR	-19.338	16129835 GI:16129835	TRUE	_ISAGQAIR_	408.24	NH3	4	y	1	470.272	11.0944	FALSE	gi	16129835 GI:16129835	16129835 GI:16129835	ASAP:ABE-0006284|UniProtKB/Swiss-Prot:P07330|EcoGene:EG10147|GeneID:946394|						GCF_000005845.2_ASM584v2_genomic_29-OCT-2014 _iRT	>gi|16129835 GI:16129835|ASAP:ABE-0006284|UniProtKB/Swiss-Prot:P07330|EcoGene:EG10147|GeneID:946394|
2	_ISAGQAIR_	_ISAGQAIR_	ISAGQAIR	-19.338	16129835 GI:16129835	TRUE	_ISAGQAIR_	408.24	NH3	5	y	1	527.294	7.73729	TRUE	gi	16129835 GI:16129835	16129835 GI:16129835	ASAP:ABE-0006284|UniProtKB/Swiss-Prot:P07330|EcoGene:EG10147|GeneID:946394|						GCF_000005845.2_ASM584v2_genomic_29-OCT-2014 _iRT	>gi|16129835 GI:16129835|ASAP:ABE-0006284|UniProtKB/Swiss-Prot:P07330|EcoGene:EG10147|GeneID:946394|
2	_ISAGQAIR_	_ISAGQAIR_	ISAGQAIR	-19.338	16129835 GI:16129835	TRUE	_ISAGQAIR_	408.24	noloss	5	y	1	544.32	25.4738	FALSE	gi	16129835 GI:16129835	16129835 GI:16129835	ASAP:ABE-0006284|UniProtKB/Swiss-Prot:P07330|EcoGene:EG10147|GeneID:946394|						GCF_000005845.2_ASM584v2_genomic_29-OCT-2014 _iRT	>gi|16129835 GI:16129835|ASAP:ABE-0006284|UniProtKB/Swiss-Prot:P07330|EcoGene:EG10147|GeneID:946394|
2	_ISAGQAIR_	_ISAGQAIR_	ISAGQAIR	-19.338	16129835 GI:16129835	TRUE	_ISAGQAIR_	408.24	noloss	6	y	1	615.357	54.871	FALSE	gi	16129835 GI:16129835	16129835 GI:16129835	ASAP:ABE-0006284|UniProtKB/Swiss-Prot:P07330|EcoGene:EG10147|GeneID:946394|						GCF_000005845.2_ASM584v2_genomic_29-OCT-2014 _iRT	>gi|16129835 GI:16129835|ASAP:ABE-0006284|UniProtKB/Swiss-Prot:P07330|EcoGene:EG10147|GeneID:946394|
2	_ISAGQAIR_	_ISAGQAIR_	ISAGQAIR	-19.338	16129835 GI:16129835	TRUE	_ISAGQAIR_	408.24	H2O	7	y	1	684.379	7.73545	TRUE	gi	16129835 GI:16129835	16129835 GI:16129835	ASAP:ABE-0006284|UniProtKB/Swiss-Prot:P07330|EcoGene:EG10147|GeneID:946394|						GCF_000005845.2_ASM584v2_genomic_29-OCT-2014 _iRT	>gi|16129835 GI:16129835|ASAP:ABE-0006284|UniProtKB/Swiss-Prot:P07330|EcoGene:EG10147|GeneID:946394|
2	_ISAGQAIR_	_ISAGQAIR_	ISAGQAIR	-19.338	16129835 GI:16129835	TRUE	_ISAGQAIR_	408.24	NH3	7	y	1	685.363	9.67675	TRUE	gi	16129835 GI:16129835	16129835 GI:16129835	ASAP:ABE-0006284|UniProtKB/Swiss-Prot:P07330|EcoGene:EG10147|GeneID:946394|						GCF_000005845.2_ASM584v2_genomic_29-OCT-2014 _iRT	>gi|16129835 GI:16129835|ASAP:ABE-0006284|UniProtKB/Swiss-Prot:P07330|EcoGene:EG10147|GeneID:946394|
2	_ISAGQAIR_	_ISAGQAIR_	ISAGQAIR	-19.338	16129835 GI:16129835	TRUE	_ISAGQAIR_	408.24	noloss	7	y	1	702.389	100	FALSE	gi	16129835 GI:16129835	16129835 GI:16129835	ASAP:ABE-0006284|UniProtKB/Swiss-Prot:P07330|EcoGene:EG10147|GeneID:946394|						GCF_000005845.2_ASM584v2_genomic_29-OCT-2014 _iRT	>gi|16129835 GI:16129835|ASAP:ABE-0006284|UniProtKB/Swiss-Prot:P07330|EcoGene:EG10147|GeneID:946394|
2	_LIDDIVK_	_LIDDIVK_	LIDDIVK	19.7779	16130597 GI:16130597	TRUE	_LIDDIVK_	408.247	noloss	3	y	1	359.265	16.8836	FALSE	gi	16130597 GI:16130597	16130597 GI:16130597	ASAP:ABE-0008838|UniProtKB/Swiss-Prot:P27303|EcoGene:EG11354|GeneID:947166|						GCF_000005845.2_ASM584v2_genomic_29-OCT-2014 _iRT	>gi|16130597 GI:16130597|ASAP:ABE-0008838|UniProtKB/Swiss-Prot:P27303|EcoGene:EG11354|GeneID:947166|
2	_LIDDIVK_	_LIDDIVK_	LIDDIVK	19.7779	16130597 GI:16130597	TRUE	_LIDDIVK_	408.247	noloss	4	b	1	457.229	17.8602	FALSE	gi	16130597 GI:16130597	16130597 GI:16130597	ASAP:ABE-0008838|UniProtKB/Swiss-Prot:P27303|EcoGene:EG11354|GeneID:947166|						GCF_000005845.2_ASM584v2_genomic_29-OCT-2014 _iRT	>gi|16130597 GI:16130597|ASAP:ABE-0008838|UniProtKB/Swiss-Prot:P27303|EcoGene:EG11354|GeneID:947166|
2	_LIDDIVK_	_LIDDIVK_	LIDDIVK	19.7779	16130597 GI:16130597	TRUE	_LIDDIVK_	408.247	noloss	4	y	1	474.292	18.8655	FALSE	gi	16130597 GI:16130597	16130597 GI:16130597	ASAP:ABE-0008838|UniProtKB/Swiss-Prot:P27303|EcoGene:EG11354|GeneID:947166|						GCF_000005845.2_ASM584v2_genomic_29-OCT-2014 _iRT	>gi|16130597 GI:16130597|ASAP:ABE-0008838|UniProtKB/Swiss-Prot:P27303|EcoGene:EG11354|GeneID:947166|
2	_LIDDIVK_	_LIDDIVK_	LIDDIVK	19.7779	16130597 GI:16130597	TRUE	_LIDDIVK_	408.247	noloss	5	y	1	589.319	100	FALSE	gi	16130597 GI:16130597	16130597 GI:16130597	ASAP:ABE-0008838|UniProtKB/Swiss-Prot:P27303|EcoGene:EG11354|GeneID:947166|						GCF_000005845.2_ASM584v2_genomic_29-OCT-2014 _iRT	>gi|16130597 GI:16130597|ASAP:ABE-0008838|UniProtKB/Swiss-Prot:P27303|EcoGene:EG11354|GeneID:947166|
2	_LIDDIVK_	_LIDDIVK_	LIDDIVK	19.7779	16130597 GI:16130597	TRUE	_LIDDIVK_	408.247	noloss	6	y	1	702.403	57.2856	FALSE	gi	16130597 GI:16130597	16130597 GI:16130597	ASAP:ABE-0008838|UniProtKB/Swiss-Prot:P27303|EcoGene:EG11354|GeneID:947166|						GCF_000005845.2_ASM584v2_genomic_29-OCT-2014 _iRT	>gi|16130597 GI:16130597|ASAP:ABE-0008838|UniProtKB/Swiss-Prot:P27303|EcoGene:EG11354|GeneID:947166|
2	_VDPTNDR_	_VDPTNDR_	VDPTNDR	-47.7631	16131817 GI:16131817	TRUE	_VDPTNDR_	408.696	noloss	5	y	2	301.648	72.8296	FALSE	gi	16131817 GI:16131817	16131817 GI:16131817	ASAP:ABE-0013041|UniProtKB/Swiss-Prot:P0A8V2|EcoGene:EG10894|GeneID:948488|						GCF_000005845.2_ASM584v2_genomic_29-OCT-2014 _iRT	>gi|16131817 GI:16131817|ASAP:ABE-0013041|UniProtKB/Swiss-Prot:P0A8V2|EcoGene:EG10894|GeneID:948488|
2	_VDPTNDR_	_VDPTNDR_	VDPTNDR	-47.7631	16131817 GI:16131817	TRUE	_VDPTNDR_	408.696	noloss	3	y	1	404.189	24.3205	FALSE	gi	16131817 GI:16131817	16131817 GI:16131817	ASAP:ABE-0013041|UniProtKB/Swiss-Prot:P0A8V2|EcoGene:EG10894|GeneID:948488|						GCF_000005845.2_ASM584v2_genomic_29-OCT-2014 _iRT	>gi|16131817 GI:16131817|ASAP:ABE-0013041|UniProtKB/Swiss-Prot:P0A8V2|EcoGene:EG10894|GeneID:948488|
2	_VDPTNDR_	_VDPTNDR_	VDPTNDR	-47.7631	16131817 GI:16131817	TRUE	_VDPTNDR_	408.696	noloss	4	y	1	505.237	73.1387	FALSE	gi	16131817 GI:16131817	16131817 GI:16131817	ASAP:ABE-0013041|UniProtKB/Swiss-Prot:P0A8V2|EcoGene:EG10894|GeneID:948488|						GCF_000005845.2_ASM584v2_genomic_29-OCT-2014 _iRT	>gi|16131817 GI:16131817|ASAP:ABE-0013041|UniProtKB/Swiss-Prot:P0A8V2|EcoGene:EG10894|GeneID:948488|
2	_VDPTNDR_	_VDPTNDR_	VDPTNDR	-47.7631	16131817 GI:16131817	TRUE	_VDPTNDR_	408.696	H2O	5	y	1	584.279	8.33458	FALSE	gi	16131817 GI:16131817	16131817 GI:16131817	ASAP:ABE-0013041|UniProtKB/Swiss-Prot:P0A8V2|EcoGene:EG10894|GeneID:948488|						GCF_000005845.2_ASM584v2_genomic_29-OCT-2014 _iRT	>gi|16131817 GI:16131817|ASAP:ABE-0013041|UniProtKB/Swiss-Prot:P0A8V2|EcoGene:EG10894|GeneID:948488|
2	_VDPTNDR_	_VDPTNDR_	VDPTNDR	-47.7631	16131817 GI:16131817	TRUE	_VDPTNDR_	408.696	NH3	5	y	1	585.263	7.4442	FALSE	gi	16131817 GI:16131817	16131817 GI:16131817	ASAP:ABE-0013041|UniProtKB/Swiss-Prot:P0A8V2|EcoGene:EG10894|GeneID:948488|						GCF_000005845.2_ASM584v2_genomic_29-OCT-2014 _iRT	>gi|16131817 GI:16131817|ASAP:ABE-0013041|UniProtKB/Swiss-Prot:P0A8V2|EcoGene:EG10894|GeneID:948488|
2	_VDPTNDR_	_VDPTNDR_	VDPTNDR	-47.7631	16131817 GI:16131817	TRUE	_VDPTNDR_	408.696	noloss	5	y	1	602.289	100	FALSE	gi	16131817 GI:16131817	16131817 GI:16131817	ASAP:ABE-0013041|UniProtKB/Swiss-Prot:P0A8V2|EcoGene:EG10894|GeneID:948488|						GCF_000005845.2_ASM584v2_genomic_29-OCT-2014 _iRT	>gi|16131817 GI:16131817|ASAP:ABE-0013041|UniProtKB/Swiss-Prot:P0A8V2|EcoGene:EG10894|GeneID:948488|
2	_VDPTNDR_	_VDPTNDR_	VDPTNDR	-47.7631	16131817 GI:16131817	TRUE	_VDPTNDR_	408.696	noloss	6	y	1	717.316	6.59386	TRUE	gi	16131817 GI:16131817	16131817 GI:16131817	ASAP:ABE-0013041|UniProtKB/Swiss-Prot:P0A8V2|EcoGene:EG10894|GeneID:948488|						GCF_000005845.2_ASM584v2_genomic_29-OCT-2014 _iRT	>gi|16131817 GI:16131817|ASAP:ABE-0013041|UniProtKB/Swiss-Prot:P0A8V2|EcoGene:EG10894|GeneID:948488|
2	_QEAEALR_	_QEAEALR_	QEAEALR	-35.7329	16131803 GI:16131803	TRUE	_QEAEALR_	408.714	H2O	3	b	1	311.135	6.25654	TRUE	gi	16131803 GI:16131803	16131803 GI:16131803	ASAP:ABE-0012983|UniProtKB/Swiss-Prot:P23003|EcoGene:EG11022|GeneID:947143|						GCF_000005845.2_ASM584v2_genomic_29-OCT-2014 _iRT	>gi|16131803 GI:16131803|ASAP:ABE-0012983|UniProtKB/Swiss-Prot:P23003|EcoGene:EG11022|GeneID:947143|
2	_QEAEALR_	_QEAEALR_	QEAEALR	-35.7329	16131803 GI:16131803	TRUE	_QEAEALR_	408.714	NH3	3	b	1	312.119	9.6342	TRUE	gi	16131803 GI:16131803	16131803 GI:16131803	ASAP:ABE-0012983|UniProtKB/Swiss-Prot:P23003|EcoGene:EG11022|GeneID:947143|						GCF_000005845.2_ASM584v2_genomic_29-OCT-2014 _iRT	>gi|16131803 GI:16131803|ASAP:ABE-0012983|UniProtKB/Swiss-Prot:P23003|EcoGene:EG11022|GeneID:947143|
2	_QEAEALR_	_QEAEALR_	QEAEALR	-35.7329	16131803 GI:16131803	TRUE	_QEAEALR_	408.714	NH3	3	y	1	342.214	8.51952	TRUE	gi	16131803 GI:16131803	16131803 GI:16131803	ASAP:ABE-0012983|UniProtKB/Swiss-Prot:P23003|EcoGene:EG11022|GeneID:947143|						GCF_000005845.2_ASM584v2_genomic_29-OCT-2014 _iRT	>gi|16131803 GI:16131803|ASAP:ABE-0012983|UniProtKB/Swiss-Prot:P23003|EcoGene:EG11022|GeneID:947143|
2	_QEAEALR_	_QEAEALR_	QEAEALR	-35.7329	16131803 GI:16131803	TRUE	_QEAEALR_	408.714	noloss	3	y	1	359.24	83.3234	FALSE	gi	16131803 GI:16131803	16131803 GI:16131803	ASAP:ABE-0012983|UniProtKB/Swiss-Prot:P23003|EcoGene:EG11022|GeneID:947143|						GCF_000005845.2_ASM584v2_genomic_29-OCT-2014 _iRT	>gi|16131803 GI:16131803|ASAP:ABE-0012983|UniProtKB/Swiss-Prot:P23003|EcoGene:EG11022|GeneID:947143|
2	_QEAEALR_	_QEAEALR_	QEAEALR	-35.7329	16131803 GI:16131803	TRUE	_QEAEALR_	408.714	H2O	4	b	1	440.178	10.4196	TRUE	gi	16131803 GI:16131803	16131803 GI:16131803	ASAP:ABE-0012983|UniProtKB/Swiss-Prot:P23003|EcoGene:EG11022|GeneID:947143|						GCF_000005845.2_ASM584v2_genomic_29-OCT-2014 _iRT	>gi|16131803 GI:16131803|ASAP:ABE-0012983|UniProtKB/Swiss-Prot:P23003|EcoGene:EG11022|GeneID:947143|
2	_QEAEALR_	_QEAEALR_	QEAEALR	-35.7329	16131803 GI:16131803	TRUE	_QEAEALR_	408.714	H2O	4	y	1	470.272	24.865	FALSE	gi	16131803 GI:16131803	16131803 GI:16131803	ASAP:ABE-0012983|UniProtKB/Swiss-Prot:P23003|EcoGene:EG11022|GeneID:947143|						GCF_000005845.2_ASM584v2_genomic_29-OCT-2014 _iRT	>gi|16131803 GI:16131803|ASAP:ABE-0012983|UniProtKB/Swiss-Prot:P23003|EcoGene:EG11022|GeneID:947143|
2	_QEAEALR_	_QEAEALR_	QEAEALR	-35.7329	16131803 GI:16131803	TRUE	_QEAEALR_	408.714	NH3	4	y	1	471.256	6.56389	TRUE	gi	16131803 GI:16131803	16131803 GI:16131803	ASAP:ABE-0012983|UniProtKB/Swiss-Prot:P23003|EcoGene:EG11022|GeneID:947143|						GCF_000005845.2_ASM584v2_genomic_29-OCT-2014 _iRT	>gi|16131803 GI:16131803|ASAP:ABE-0012983|UniProtKB/Swiss-Prot:P23003|EcoGene:EG11022|GeneID:947143|
2	_QEAEALR_	_QEAEALR_	QEAEALR	-35.7329	16131803 GI:16131803	TRUE	_QEAEALR_	408.714	noloss	4	y	1	488.283	47.7119	FALSE	gi	16131803 GI:16131803	16131803 GI:16131803	ASAP:ABE-0012983|UniProtKB/Swiss-Prot:P23003|EcoGene:EG11022|GeneID:947143|						GCF_000005845.2_ASM584v2_genomic_29-OCT-2014 _iRT	>gi|16131803 GI:16131803|ASAP:ABE-0012983|UniProtKB/Swiss-Prot:P23003|EcoGene:EG11022|GeneID:947143|
2	_QEAEALR_	_QEAEALR_	QEAEALR	-35.7329	16131803 GI:16131803	TRUE	_QEAEALR_	408.714	H2O	5	b	1	511.215	16.4393	FALSE	gi	16131803 GI:16131803	16131803 GI:16131803	ASAP:ABE-0012983|UniProtKB/Swiss-Prot:P23003|EcoGene:EG11022|GeneID:947143|						GCF_000005845.2_ASM584v2_genomic_29-OCT-2014 _iRT	>gi|16131803 GI:16131803|ASAP:ABE-0012983|UniProtKB/Swiss-Prot:P23003|EcoGene:EG11022|GeneID:947143|
2	_QEAEALR_	_QEAEALR_	QEAEALR	-35.7329	16131803 GI:16131803	TRUE	_QEAEALR_	408.714	H2O	5	y	1	541.309	6.1741	TRUE	gi	16131803 GI:16131803	16131803 GI:16131803	ASAP:ABE-0012983|UniProtKB/Swiss-Prot:P23003|EcoGene:EG11022|GeneID:947143|						GCF_000005845.2_ASM584v2_genomic_29-OCT-2014 _iRT	>gi|16131803 GI:16131803|ASAP:ABE-0012983|UniProtKB/Swiss-Prot:P23003|EcoGene:EG11022|GeneID:947143|
2	_QEAEALR_	_QEAEALR_	QEAEALR	-35.7329	16131803 GI:16131803	TRUE	_QEAEALR_	408.714	noloss	5	y	1	559.32	100	FALSE	gi	16131803 GI:16131803	16131803 GI:16131803	ASAP:ABE-0012983|UniProtKB/Swiss-Prot:P23003|EcoGene:EG11022|GeneID:947143|						GCF_000005845.2_ASM584v2_genomic_29-OCT-2014 _iRT	>gi|16131803 GI:16131803|ASAP:ABE-0012983|UniProtKB/Swiss-Prot:P23003|EcoGene:EG11022|GeneID:947143|
2	_QEAEALR_	_QEAEALR_	QEAEALR	-35.7329	16131803 GI:16131803	TRUE	_QEAEALR_	408.714	H2O	6	y	1	670.352	6.69391	TRUE	gi	16131803 GI:16131803	16131803 GI:16131803	ASAP:ABE-0012983|UniProtKB/Swiss-Prot:P23003|EcoGene:EG11022|GeneID:947143|						GCF_000005845.2_ASM584v2_genomic_29-OCT-2014 _iRT	>gi|16131803 GI:16131803|ASAP:ABE-0012983|UniProtKB/Swiss-Prot:P23003|EcoGene:EG11022|GeneID:947143|
2	_QEAEALR_	_QEAEALR_	QEAEALR	-35.7329	16131803 GI:16131803	TRUE	_QEAEALR_	408.714	noloss	6	y	1	688.362	22.7156	FALSE	gi	16131803 GI:16131803	16131803 GI:16131803	ASAP:ABE-0012983|UniProtKB/Swiss-Prot:P23003|EcoGene:EG11022|GeneID:947143|						GCF_000005845.2_ASM584v2_genomic_29-OCT-2014 _iRT	>gi|16131803 GI:16131803|ASAP:ABE-0012983|UniProtKB/Swiss-Prot:P23003|EcoGene:EG11022|GeneID:947143|
3	_TEEVRPLQPR_	_TEEVRPLQPR_	TEEVRPLQPR	-16.9137	16129411 GI:16129411	TRUE	_TEEVRPLQPR_	408.895	noloss	5	y	2	305.687	9.21844	TRUE	gi	16129411 GI:16129411	16129411 GI:16129411	ASAP:ABE-0004843|UniProtKB/Swiss-Prot:P76116|EcoGene:EG13775|GeneID:946006|						GCF_000005845.2_ASM584v2_genomic_29-OCT-2014 _iRT	>gi|16129411 GI:16129411|ASAP:ABE-0004843|UniProtKB/Swiss-Prot:P76116|EcoGene:EG13775|GeneID:946006|
3	_TEEVRPLQPR_	_TEEVRPLQPR_	TEEVRPLQPR	-16.9137	16129411 GI:16129411	TRUE	_TEEVRPLQPR_	408.895	NH3	6	y	2	375.224	9.07045	TRUE	gi	16129411 GI:16129411	16129411 GI:16129411	ASAP:ABE-0004843|UniProtKB/Swiss-Prot:P76116|EcoGene:EG13775|GeneID:946006|						GCF_000005845.2_ASM584v2_genomic_29-OCT-2014 _iRT	>gi|16129411 GI:16129411|ASAP:ABE-0004843|UniProtKB/Swiss-Prot:P76116|EcoGene:EG13775|GeneID:946006|
3	_TEEVRPLQPR_	_TEEVRPLQPR_	TEEVRPLQPR	-16.9137	16129411 GI:16129411	TRUE	_TEEVRPLQPR_	408.895	noloss	6	y	2	383.738	10.8436	TRUE	gi	16129411 GI:16129411	16129411 GI:16129411	ASAP:ABE-0004843|UniProtKB/Swiss-Prot:P76116|EcoGene:EG13775|GeneID:946006|						GCF_000005845.2_ASM584v2_genomic_29-OCT-2014 _iRT	>gi|16129411 GI:16129411|ASAP:ABE-0004843|UniProtKB/Swiss-Prot:P76116|EcoGene:EG13775|GeneID:946006|
3	_TEEVRPLQPR_	_TEEVRPLQPR_	TEEVRPLQPR	-16.9137	16129411 GI:16129411	TRUE	_TEEVRPLQPR_	408.895	noloss	3	y	1	400.23	10.3439	TRUE	gi	16129411 GI:16129411	16129411 GI:16129411	ASAP:ABE-0004843|UniProtKB/Swiss-Prot:P76116|EcoGene:EG13775|GeneID:946006|						GCF_000005845.2_ASM584v2_genomic_29-OCT-2014 _iRT	>gi|16129411 GI:16129411|ASAP:ABE-0004843|UniProtKB/Swiss-Prot:P76116|EcoGene:EG13775|GeneID:946006|
3	_TEEVRPLQPR_	_TEEVRPLQPR_	TEEVRPLQPR	-16.9137	16129411 GI:16129411	TRUE	_TEEVRPLQPR_	408.895	noloss	7	y	2	433.272	69.4322	FALSE	gi	16129411 GI:16129411	16129411 GI:16129411	ASAP:ABE-0004843|UniProtKB/Swiss-Prot:P76116|EcoGene:EG13775|GeneID:946006|						GCF_000005845.2_ASM584v2_genomic_29-OCT-2014 _iRT	>gi|16129411 GI:16129411|ASAP:ABE-0004843|UniProtKB/Swiss-Prot:P76116|EcoGene:EG13775|GeneID:946006|
3	_TEEVRPLQPR_	_TEEVRPLQPR_	TEEVRPLQPR	-16.9137	16129411 GI:16129411	TRUE	_TEEVRPLQPR_	408.895	H2O	8	y	2	488.788	23.1724	FALSE	gi	16129411 GI:16129411	16129411 GI:16129411	ASAP:ABE-0004843|UniProtKB/Swiss-Prot:P76116|EcoGene:EG13775|GeneID:946006|						GCF_000005845.2_ASM584v2_genomic_29-OCT-2014 _iRT	>gi|16129411 GI:16129411|ASAP:ABE-0004843|UniProtKB/Swiss-Prot:P76116|EcoGene:EG13775|GeneID:946006|
3	_TEEVRPLQPR_	_TEEVRPLQPR_	TEEVRPLQPR	-16.9137	16129411 GI:16129411	TRUE	_TEEVRPLQPR_	408.895	NH3	8	y	2	489.28	17.4765	FALSE	gi	16129411 GI:16129411	16129411 GI:16129411	ASAP:ABE-0004843|UniProtKB/Swiss-Prot:P76116|EcoGene:EG13775|GeneID:946006|						GCF_000005845.2_ASM584v2_genomic_29-OCT-2014 _iRT	>gi|16129411 GI:16129411|ASAP:ABE-0004843|UniProtKB/Swiss-Prot:P76116|EcoGene:EG13775|GeneID:946006|
3	_TEEVRPLQPR_	_TEEVRPLQPR_	TEEVRPLQPR	-16.9137	16129411 GI:16129411	TRUE	_TEEVRPLQPR_	408.895	noloss	8	y	2	497.793	100	FALSE	gi	16129411 GI:16129411	16129411 GI:16129411	ASAP:ABE-0004843|UniProtKB/Swiss-Prot:P76116|EcoGene:EG13775|GeneID:946006|						GCF_000005845.2_ASM584v2_genomic_29-OCT-2014 _iRT	>gi|16129411 GI:16129411|ASAP:ABE-0004843|UniProtKB/Swiss-Prot:P76116|EcoGene:EG13775|GeneID:946006|
3	_TEEVRPLQPR_	_TEEVRPLQPR_	TEEVRPLQPR	-16.9137	16129411 GI:16129411	TRUE	_TEEVRPLQPR_	408.895	H2O	9	y	2	553.309	17.1323	TRUE	gi	16129411 GI:16129411	16129411 GI:16129411	ASAP:ABE-0004843|UniProtKB/Swiss-Prot:P76116|EcoGene:EG13775|GeneID:946006|						GCF_000005845.2_ASM584v2_genomic_29-OCT-2014 _iRT	>gi|16129411 GI:16129411|ASAP:ABE-0004843|UniProtKB/Swiss-Prot:P76116|EcoGene:EG13775|GeneID:946006|
3	_TEEVRPLQPR_	_TEEVRPLQPR_	TEEVRPLQPR	-16.9137	16129411 GI:16129411	TRUE	_TEEVRPLQPR_	408.895	NH3	9	y	2	553.801	12.7299	TRUE	gi	16129411 GI:16129411	16129411 GI:16129411	ASAP:ABE-0004843|UniProtKB/Swiss-Prot:P76116|EcoGene:EG13775|GeneID:946006|						GCF_000005845.2_ASM584v2_genomic_29-OCT-2014 _iRT	>gi|16129411 GI:16129411|ASAP:ABE-0004843|UniProtKB/Swiss-Prot:P76116|EcoGene:EG13775|GeneID:946006|
3	_TEEVRPLQPR_	_TEEVRPLQPR_	TEEVRPLQPR	-16.9137	16129411 GI:16129411	TRUE	_TEEVRPLQPR_	408.895	noloss	9	y	2	562.315	67.1839	FALSE	gi	16129411 GI:16129411	16129411 GI:16129411	ASAP:ABE-0004843|UniProtKB/Swiss-Prot:P76116|EcoGene:EG13775|GeneID:946006|						GCF_000005845.2_ASM584v2_genomic_29-OCT-2014 _iRT	>gi|16129411 GI:16129411|ASAP:ABE-0004843|UniProtKB/Swiss-Prot:P76116|EcoGene:EG13775|GeneID:946006|
3	_TEEVRPLQPR_	_TEEVRPLQPR_	TEEVRPLQPR	-16.9137	16129411 GI:16129411	TRUE	_TEEVRPLQPR_	408.895	noloss	5	y	1	610.367	56.705	FALSE	gi	16129411 GI:16129411	16129411 GI:16129411	ASAP:ABE-0004843|UniProtKB/Swiss-Prot:P76116|EcoGene:EG13775|GeneID:946006|						GCF_000005845.2_ASM584v2_genomic_29-OCT-2014 _iRT	>gi|16129411 GI:16129411|ASAP:ABE-0004843|UniProtKB/Swiss-Prot:P76116|EcoGene:EG13775|GeneID:946006|
3	_TEEVRPLQPR_	_TEEVRPLQPR_	TEEVRPLQPR	-16.9137	16129411 GI:16129411	TRUE	_TEEVRPLQPR_	408.895	NH3	6	y	1	749.442	9.32789	TRUE	gi	16129411 GI:16129411	16129411 GI:16129411	ASAP:ABE-0004843|UniProtKB/Swiss-Prot:P76116|EcoGene:EG13775|GeneID:946006|						GCF_000005845.2_ASM584v2_genomic_29-OCT-2014 _iRT	>gi|16129411 GI:16129411|ASAP:ABE-0004843|UniProtKB/Swiss-Prot:P76116|EcoGene:EG13775|GeneID:946006|
2	_LMGFGHR_	_LMGFGHR_	LMGFGHR	-4.54534	16128695 GI:16128695	TRUE	_LMGFGHR_	409.211	NH3	3	y	1	352.173	5.16002	FALSE	gi	16128695 GI:16128695	16128695 GI:16128695	ASAP:ABE-0002451|UniProtKB/Swiss-Prot:P0ABH7|EcoGene:EG10402|GeneID:945323|						GCF_000005845.2_ASM584v2_genomic_29-OCT-2014 _iRT	>gi|16128695 GI:16128695|ASAP:ABE-0002451|UniProtKB/Swiss-Prot:P0ABH7|EcoGene:EG10402|GeneID:945323|
2	_LMGFGHR_	_LMGFGHR_	LMGFGHR	-4.54534	16128695 GI:16128695	TRUE	_LMGFGHR_	409.211	noloss	3	y	1	369.199	13.0838	FALSE	gi	16128695 GI:16128695	16128695 GI:16128695	ASAP:ABE-0002451|UniProtKB/Swiss-Prot:P0ABH7|EcoGene:EG10402|GeneID:945323|						GCF_000005845.2_ASM584v2_genomic_29-OCT-2014 _iRT	>gi|16128695 GI:16128695|ASAP:ABE-0002451|UniProtKB/Swiss-Prot:P0ABH7|EcoGene:EG10402|GeneID:945323|
2	_LMGFGHR_	_LMGFGHR_	LMGFGHR	-4.54534	16128695 GI:16128695	TRUE	_LMGFGHR_	409.211	noloss	4	y	1	516.268	9.1711	FALSE	gi	16128695 GI:16128695	16128695 GI:16128695	ASAP:ABE-0002451|UniProtKB/Swiss-Prot:P0ABH7|EcoGene:EG10402|GeneID:945323|						GCF_000005845.2_ASM584v2_genomic_29-OCT-2014 _iRT	>gi|16128695 GI:16128695|ASAP:ABE-0002451|UniProtKB/Swiss-Prot:P0ABH7|EcoGene:EG10402|GeneID:945323|
2	_LMGFGHR_	_LMGFGHR_	LMGFGHR	-4.54534	16128695 GI:16128695	TRUE	_LMGFGHR_	409.211	NH3	5	y	1	556.263	10.7968	FALSE	gi	16128695 GI:16128695	16128695 GI:16128695	ASAP:ABE-0002451|UniProtKB/Swiss-Prot:P0ABH7|EcoGene:EG10402|GeneID:945323|						GCF_000005845.2_ASM584v2_genomic_29-OCT-2014 _iRT	>gi|16128695 GI:16128695|ASAP:ABE-0002451|UniProtKB/Swiss-Prot:P0ABH7|EcoGene:EG10402|GeneID:945323|
2	_LMGFGHR_	_LMGFGHR_	LMGFGHR	-4.54534	16128695 GI:16128695	TRUE	_LMGFGHR_	409.211	noloss	5	y	1	573.289	100	FALSE	gi	16128695 GI:16128695	16128695 GI:16128695	ASAP:ABE-0002451|UniProtKB/Swiss-Prot:P0ABH7|EcoGene:EG10402|GeneID:945323|						GCF_000005845.2_ASM584v2_genomic_29-OCT-2014 _iRT	>gi|16128695 GI:16128695|ASAP:ABE-0002451|UniProtKB/Swiss-Prot:P0ABH7|EcoGene:EG10402|GeneID:945323|
2	_LMGFGHR_	_LMGFGHR_	LMGFGHR	-4.54534	16128695 GI:16128695	TRUE	_LMGFGHR_	409.211	noloss	6	y	1	704.33	37.1553	FALSE	gi	16128695 GI:16128695	16128695 GI:16128695	ASAP:ABE-0002451|UniProtKB/Swiss-Prot:P0ABH7|EcoGene:EG10402|GeneID:945323|						GCF_000005845.2_ASM584v2_genomic_29-OCT-2014 _iRT	>gi|16128695 GI:16128695|ASAP:ABE-0002451|UniProtKB/Swiss-Prot:P0ABH7|EcoGene:EG10402|GeneID:945323|
2	_ISGANLSR_	_ISGANLSR_	ISGANLSR	-22.6473	16128108 GI:16128108	TRUE	_ISGANLSR_	409.23	noloss	5	b	1	443.225	5.56636	FALSE	gi	16128108 GI:16128108	16128108 GI:16128108	ASAP:ABE-0000400|UniProtKB/Swiss-Prot:P06959|EcoGene:EG10025|GeneID:944794|						GCF_000005845.2_ASM584v2_genomic_29-OCT-2014 _iRT	>gi|16128108 GI:16128108|ASAP:ABE-0000400|UniProtKB/Swiss-Prot:P06959|EcoGene:EG10025|GeneID:944794|
2	_ISGANLSR_	_ISGANLSR_	ISGANLSR	-22.6473	16128108 GI:16128108	TRUE	_ISGANLSR_	409.23	NH3	4	y	1	472.251	5.50701	TRUE	gi	16128108 GI:16128108	16128108 GI:16128108	ASAP:ABE-0000400|UniProtKB/Swiss-Prot:P06959|EcoGene:EG10025|GeneID:944794|						GCF_000005845.2_ASM584v2_genomic_29-OCT-2014 _iRT	>gi|16128108 GI:16128108|ASAP:ABE-0000400|UniProtKB/Swiss-Prot:P06959|EcoGene:EG10025|GeneID:944794|
2	_ISGANLSR_	_ISGANLSR_	ISGANLSR	-22.6473	16128108 GI:16128108	TRUE	_ISGANLSR_	409.23	noloss	4	y	1	489.278	11.3933	FALSE	gi	16128108 GI:16128108	16128108 GI:16128108	ASAP:ABE-0000400|UniProtKB/Swiss-Prot:P06959|EcoGene:EG10025|GeneID:944794|						GCF_000005845.2_ASM584v2_genomic_29-OCT-2014 _iRT	>gi|16128108 GI:16128108|ASAP:ABE-0000400|UniProtKB/Swiss-Prot:P06959|EcoGene:EG10025|GeneID:944794|
2	_ISGANLSR_	_ISGANLSR_	ISGANLSR	-22.6473	16128108 GI:16128108	TRUE	_ISGANLSR_	409.23	noloss	5	y	1	560.315	5.75748	FALSE	gi	16128108 GI:16128108	16128108 GI:16128108	ASAP:ABE-0000400|UniProtKB/Swiss-Prot:P06959|EcoGene:EG10025|GeneID:944794|						GCF_000005845.2_ASM584v2_genomic_29-OCT-2014 _iRT	>gi|16128108 GI:16128108|ASAP:ABE-0000400|UniProtKB/Swiss-Prot:P06959|EcoGene:EG10025|GeneID:944794|
2	_ISGANLSR_	_ISGANLSR_	ISGANLSR	-22.6473	16128108 GI:16128108	TRUE	_ISGANLSR_	409.23	noloss	6	y	1	617.337	52.5151	FALSE	gi	16128108 GI:16128108	16128108 GI:16128108	ASAP:ABE-0000400|UniProtKB/Swiss-Prot:P06959|EcoGene:EG10025|GeneID:944794|						GCF_000005845.2_ASM584v2_genomic_29-OCT-2014 _iRT	>gi|16128108 GI:16128108|ASAP:ABE-0000400|UniProtKB/Swiss-Prot:P06959|EcoGene:EG10025|GeneID:944794|
2	_ISGANLSR_	_ISGANLSR_	ISGANLSR	-22.6473	16128108 GI:16128108	TRUE	_ISGANLSR_	409.23	H2O	7	y	1	686.358	7.6139	FALSE	gi	16128108 GI:16128108	16128108 GI:16128108	ASAP:ABE-0000400|UniProtKB/Swiss-Prot:P06959|EcoGene:EG10025|GeneID:944794|						GCF_000005845.2_ASM584v2_genomic_29-OCT-2014 _iRT	>gi|16128108 GI:16128108|ASAP:ABE-0000400|UniProtKB/Swiss-Prot:P06959|EcoGene:EG10025|GeneID:944794|
2	_ISGANLSR_	_ISGANLSR_	ISGANLSR	-22.6473	16128108 GI:16128108	TRUE	_ISGANLSR_	409.23	NH3	7	y	1	687.342	5.33457	TRUE	gi	16128108 GI:16128108	16128108 GI:16128108	ASAP:ABE-0000400|UniProtKB/Swiss-Prot:P06959|EcoGene:EG10025|GeneID:944794|						GCF_000005845.2_ASM584v2_genomic_29-OCT-2014 _iRT	>gi|16128108 GI:16128108|ASAP:ABE-0000400|UniProtKB/Swiss-Prot:P06959|EcoGene:EG10025|GeneID:944794|
2	_ISGANLSR_	_ISGANLSR_	ISGANLSR	-22.6473	16128108 GI:16128108	TRUE	_ISGANLSR_	409.23	noloss	7	y	1	704.369	100	FALSE	gi	16128108 GI:16128108	16128108 GI:16128108	ASAP:ABE-0000400|UniProtKB/Swiss-Prot:P06959|EcoGene:EG10025|GeneID:944794|						GCF_000005845.2_ASM584v2_genomic_29-OCT-2014 _iRT	>gi|16128108 GI:16128108|ASAP:ABE-0000400|UniProtKB/Swiss-Prot:P06959|EcoGene:EG10025|GeneID:944794|
3	_HPAVPVDVVHR_	_HPAVPVDVVHR_	HPAVPVDVVHR	-5.70418	90111705 GI:90111705	TRUE	_HPAVPVDVVHR_	409.232	noloss	3	b	1	306.156	12.3573	TRUE	gi	90111705 GI:90111705	90111705 GI:90111705	ASAP:ABE-0013759|UniProtKB/Swiss-Prot:P0A9L3|EcoGene:EG12503|GeneID:948726|						GCF_000005845.2_ASM584v2_genomic_29-OCT-2014 _iRT	>gi|90111705 GI:90111705|ASAP:ABE-0013759|UniProtKB/Swiss-Prot:P0A9L3|EcoGene:EG12503|GeneID:948726|
3	_HPAVPVDVVHR_	_HPAVPVDVVHR_	HPAVPVDVVHR	-5.70418	90111705 GI:90111705	TRUE	_HPAVPVDVVHR_	409.232	H2O	4	b	1	387.214	22.1086	FALSE	gi	90111705 GI:90111705	90111705 GI:90111705	ASAP:ABE-0013759|UniProtKB/Swiss-Prot:P0A9L3|EcoGene:EG12503|GeneID:948726|						GCF_000005845.2_ASM584v2_genomic_29-OCT-2014 _iRT	>gi|90111705 GI:90111705|ASAP:ABE-0013759|UniProtKB/Swiss-Prot:P0A9L3|EcoGene:EG12503|GeneID:948726|
3	_HPAVPVDVVHR_	_HPAVPVDVVHR_	HPAVPVDVVHR	-5.70418	90111705 GI:90111705	TRUE	_HPAVPVDVVHR_	409.232	noloss	4	b	1	405.224	100	FALSE	gi	90111705 GI:90111705	90111705 GI:90111705	ASAP:ABE-0013759|UniProtKB/Swiss-Prot:P0A9L3|EcoGene:EG12503|GeneID:948726|						GCF_000005845.2_ASM584v2_genomic_29-OCT-2014 _iRT	>gi|90111705 GI:90111705|ASAP:ABE-0013759|UniProtKB/Swiss-Prot:P0A9L3|EcoGene:EG12503|GeneID:948726|
3	_HPAVPVDVVHR_	_HPAVPVDVVHR_	HPAVPVDVVHR	-5.70418	90111705 GI:90111705	TRUE	_HPAVPVDVVHR_	409.232	noloss	3	y	1	411.246	41.3481	FALSE	gi	90111705 GI:90111705	90111705 GI:90111705	ASAP:ABE-0013759|UniProtKB/Swiss-Prot:P0A9L3|EcoGene:EG12503|GeneID:948726|						GCF_000005845.2_ASM584v2_genomic_29-OCT-2014 _iRT	>gi|90111705 GI:90111705|ASAP:ABE-0013759|UniProtKB/Swiss-Prot:P0A9L3|EcoGene:EG12503|GeneID:948726|
3	_HPAVPVDVVHR_	_HPAVPVDVVHR_	HPAVPVDVVHR	-5.70418	90111705 GI:90111705	TRUE	_HPAVPVDVVHR_	409.232	noloss	4	y	1	510.315	28.6343	FALSE	gi	90111705 GI:90111705	90111705 GI:90111705	ASAP:ABE-0013759|UniProtKB/Swiss-Prot:P0A9L3|EcoGene:EG12503|GeneID:948726|						GCF_000005845.2_ASM584v2_genomic_29-OCT-2014 _iRT	>gi|90111705 GI:90111705|ASAP:ABE-0013759|UniProtKB/Swiss-Prot:P0A9L3|EcoGene:EG12503|GeneID:948726|
3	_HPAVPVDVVHR_	_HPAVPVDVVHR_	HPAVPVDVVHR	-5.70418	90111705 GI:90111705	TRUE	_HPAVPVDVVHR_	409.232	NH3	5	y	1	608.315	45.6909	FALSE	gi	90111705 GI:90111705	90111705 GI:90111705	ASAP:ABE-0013759|UniProtKB/Swiss-Prot:P0A9L3|EcoGene:EG12503|GeneID:948726|						GCF_000005845.2_ASM584v2_genomic_29-OCT-2014 _iRT	>gi|90111705 GI:90111705|ASAP:ABE-0013759|UniProtKB/Swiss-Prot:P0A9L3|EcoGene:EG12503|GeneID:948726|
3	_HPAVPVDVVHR_	_HPAVPVDVVHR_	HPAVPVDVVHR	-5.70418	90111705 GI:90111705	TRUE	_HPAVPVDVVHR_	409.232	noloss	5	y	1	625.342	57.3168	FALSE	gi	90111705 GI:90111705	90111705 GI:90111705	ASAP:ABE-0013759|UniProtKB/Swiss-Prot:P0A9L3|EcoGene:EG12503|GeneID:948726|						GCF_000005845.2_ASM584v2_genomic_29-OCT-2014 _iRT	>gi|90111705 GI:90111705|ASAP:ABE-0013759|UniProtKB/Swiss-Prot:P0A9L3|EcoGene:EG12503|GeneID:948726|
3	_HPAVPVDVVHR_	_HPAVPVDVVHR_	HPAVPVDVVHR	-5.70418	90111705 GI:90111705	TRUE	_HPAVPVDVVHR_	409.232	H2O	7	b	1	698.362	13.3242	TRUE	gi	90111705 GI:90111705	90111705 GI:90111705	ASAP:ABE-0013759|UniProtKB/Swiss-Prot:P0A9L3|EcoGene:EG12503|GeneID:948726|						GCF_000005845.2_ASM584v2_genomic_29-OCT-2014 _iRT	>gi|90111705 GI:90111705|ASAP:ABE-0013759|UniProtKB/Swiss-Prot:P0A9L3|EcoGene:EG12503|GeneID:948726|
3	_HPAVPVDVVHR_	_HPAVPVDVVHR_	HPAVPVDVVHR	-5.70418	90111705 GI:90111705	TRUE	_HPAVPVDVVHR_	409.232	NH3	7	b	1	699.346	5.27203	TRUE	gi	90111705 GI:90111705	90111705 GI:90111705	ASAP:ABE-0013759|UniProtKB/Swiss-Prot:P0A9L3|EcoGene:EG12503|GeneID:948726|						GCF_000005845.2_ASM584v2_genomic_29-OCT-2014 _iRT	>gi|90111705 GI:90111705|ASAP:ABE-0013759|UniProtKB/Swiss-Prot:P0A9L3|EcoGene:EG12503|GeneID:948726|
3	_HPAVPVDVVHR_	_HPAVPVDVVHR_	HPAVPVDVVHR	-5.70418	90111705 GI:90111705	TRUE	_HPAVPVDVVHR_	409.232	noloss	7	b	1	716.373	7.68636	TRUE	gi	90111705 GI:90111705	90111705 GI:90111705	ASAP:ABE-0013759|UniProtKB/Swiss-Prot:P0A9L3|EcoGene:EG12503|GeneID:948726|						GCF_000005845.2_ASM584v2_genomic_29-OCT-2014 _iRT	>gi|90111705 GI:90111705|ASAP:ABE-0013759|UniProtKB/Swiss-Prot:P0A9L3|EcoGene:EG12503|GeneID:948726|
3	_HPAVPVDVVHR_	_HPAVPVDVVHR_	HPAVPVDVVHR	-5.70418	90111705 GI:90111705	TRUE	_HPAVPVDVVHR_	409.232	noloss	6	y	1	724.41	9.71703	TRUE	gi	90111705 GI:90111705	90111705 GI:90111705	ASAP:ABE-0013759|UniProtKB/Swiss-Prot:P0A9L3|EcoGene:EG12503|GeneID:948726|						GCF_000005845.2_ASM584v2_genomic_29-OCT-2014 _iRT	>gi|90111705 GI:90111705|ASAP:ABE-0013759|UniProtKB/Swiss-Prot:P0A9L3|EcoGene:EG12503|GeneID:948726|
3	_HPAVPVDVVHR_	_HPAVPVDVVHR_	HPAVPVDVVHR	-5.70418	90111705 GI:90111705	TRUE	_HPAVPVDVVHR_	409.232	noloss	7	y	1	821.463	20.3882	TRUE	gi	90111705 GI:90111705	90111705 GI:90111705	ASAP:ABE-0013759|UniProtKB/Swiss-Prot:P0A9L3|EcoGene:EG12503|GeneID:948726|						GCF_000005845.2_ASM584v2_genomic_29-OCT-2014 _iRT	>gi|90111705 GI:90111705|ASAP:ABE-0013759|UniProtKB/Swiss-Prot:P0A9L3|EcoGene:EG12503|GeneID:948726|
2	_GVIELMR_	_GVIELMR_	GVIELMR	31.3559	16131569 GI:16131569	TRUE	_GVIELMR_	409.234	NH3	3	y	1	402.217	5.6844	FALSE	gi	16131569 GI:16131569	16131569 GI:16131569	ASAP:ABE-0012098|UniProtKB/Swiss-Prot:P0A988|EcoGene:EG10242|GeneID:948218|						GCF_000005845.2_ASM584v2_genomic_29-OCT-2014 _iRT	>gi|16131569 GI:16131569|ASAP:ABE-0012098|UniProtKB/Swiss-Prot:P0A988|EcoGene:EG10242|GeneID:948218|
2	_GVIELMR_	_GVIELMR_	GVIELMR	31.3559	16131569 GI:16131569	TRUE	_GVIELMR_	409.234	noloss	3	y	1	419.244	63.8489	FALSE	gi	16131569 GI:16131569	16131569 GI:16131569	ASAP:ABE-0012098|UniProtKB/Swiss-Prot:P0A988|EcoGene:EG10242|GeneID:948218|						GCF_000005845.2_ASM584v2_genomic_29-OCT-2014 _iRT	>gi|16131569 GI:16131569|ASAP:ABE-0012098|UniProtKB/Swiss-Prot:P0A988|EcoGene:EG10242|GeneID:948218|
2	_GVIELMR_	_GVIELMR_	GVIELMR	31.3559	16131569 GI:16131569	TRUE	_GVIELMR_	409.234	H2O	4	y	1	530.276	13.1543	FALSE	gi	16131569 GI:16131569	16131569 GI:16131569	ASAP:ABE-0012098|UniProtKB/Swiss-Prot:P0A988|EcoGene:EG10242|GeneID:948218|						GCF_000005845.2_ASM584v2_genomic_29-OCT-2014 _iRT	>gi|16131569 GI:16131569|ASAP:ABE-0012098|UniProtKB/Swiss-Prot:P0A988|EcoGene:EG10242|GeneID:948218|
2	_GVIELMR_	_GVIELMR_	GVIELMR	31.3559	16131569 GI:16131569	TRUE	_GVIELMR_	409.234	NH3	4	y	1	531.26	6.29635	FALSE	gi	16131569 GI:16131569	16131569 GI:16131569	ASAP:ABE-0012098|UniProtKB/Swiss-Prot:P0A988|EcoGene:EG10242|GeneID:948218|						GCF_000005845.2_ASM584v2_genomic_29-OCT-2014 _iRT	>gi|16131569 GI:16131569|ASAP:ABE-0012098|UniProtKB/Swiss-Prot:P0A988|EcoGene:EG10242|GeneID:948218|
2	_GVIELMR_	_GVIELMR_	GVIELMR	31.3559	16131569 GI:16131569	TRUE	_GVIELMR_	409.234	noloss	4	y	1	548.286	100	FALSE	gi	16131569 GI:16131569	16131569 GI:16131569	ASAP:ABE-0012098|UniProtKB/Swiss-Prot:P0A988|EcoGene:EG10242|GeneID:948218|						GCF_000005845.2_ASM584v2_genomic_29-OCT-2014 _iRT	>gi|16131569 GI:16131569|ASAP:ABE-0012098|UniProtKB/Swiss-Prot:P0A988|EcoGene:EG10242|GeneID:948218|
2	_GVIELMR_	_GVIELMR_	GVIELMR	31.3559	16131569 GI:16131569	TRUE	_GVIELMR_	409.234	noloss	5	y	1	661.37	97.2364	FALSE	gi	16131569 GI:16131569	16131569 GI:16131569	ASAP:ABE-0012098|UniProtKB/Swiss-Prot:P0A988|EcoGene:EG10242|GeneID:948218|						GCF_000005845.2_ASM584v2_genomic_29-OCT-2014 _iRT	>gi|16131569 GI:16131569|ASAP:ABE-0012098|UniProtKB/Swiss-Prot:P0A988|EcoGene:EG10242|GeneID:948218|
4	_ALIHDVPEEYAIHK_	_ALIHDVPEEYAIHK_	ALIHDVPEEYAIHK	27.6141	16128807 GI:16128807	TRUE	_ALIHDVPEEYAIHK_	409.469	noloss	5	y	2	316.182	25.3212	TRUE	gi	16128807 GI:16128807	16128807 GI:16128807	ASAP:ABE-0002860|UniProtKB/Swiss-Prot:P08506|EcoGene:EG10203|GeneID:945455|						GCF_000005845.2_ASM584v2_genomic_29-OCT-2014 _iRT	>gi|16128807 GI:16128807|ASAP:ABE-0002860|UniProtKB/Swiss-Prot:P08506|EcoGene:EG10203|GeneID:945455|
4	_ALIHDVPEEYAIHK_	_ALIHDVPEEYAIHK_	ALIHDVPEEYAIHK	27.6141	16128807 GI:16128807	TRUE	_ALIHDVPEEYAIHK_	409.469	NH3	6	b	2	316.674	19.8551	TRUE	gi	16128807 GI:16128807	16128807 GI:16128807	ASAP:ABE-0002860|UniProtKB/Swiss-Prot:P08506|EcoGene:EG10203|GeneID:945455|						GCF_000005845.2_ASM584v2_genomic_29-OCT-2014 _iRT	>gi|16128807 GI:16128807|ASAP:ABE-0002860|UniProtKB/Swiss-Prot:P08506|EcoGene:EG10203|GeneID:945455|
4	_ALIHDVPEEYAIHK_	_ALIHDVPEEYAIHK_	ALIHDVPEEYAIHK	27.6141	16128807 GI:16128807	TRUE	_ALIHDVPEEYAIHK_	409.469	noloss	6	b	2	325.187	23.5941	TRUE	gi	16128807 GI:16128807	16128807 GI:16128807	ASAP:ABE-0002860|UniProtKB/Swiss-Prot:P08506|EcoGene:EG10203|GeneID:945455|						GCF_000005845.2_ASM584v2_genomic_29-OCT-2014 _iRT	>gi|16128807 GI:16128807|ASAP:ABE-0002860|UniProtKB/Swiss-Prot:P08506|EcoGene:EG10203|GeneID:945455|
4	_ALIHDVPEEYAIHK_	_ALIHDVPEEYAIHK_	ALIHDVPEEYAIHK	27.6141	16128807 GI:16128807	TRUE	_ALIHDVPEEYAIHK_	409.469	NH3	9	b	3	329.831	15.8855	TRUE	gi	16128807 GI:16128807	16128807 GI:16128807	ASAP:ABE-0002860|UniProtKB/Swiss-Prot:P08506|EcoGene:EG10203|GeneID:945455|						GCF_000005845.2_ASM584v2_genomic_29-OCT-2014 _iRT	>gi|16128807 GI:16128807|ASAP:ABE-0002860|UniProtKB/Swiss-Prot:P08506|EcoGene:EG10203|GeneID:945455|
4	_ALIHDVPEEYAIHK_	_ALIHDVPEEYAIHK_	ALIHDVPEEYAIHK	27.6141	16128807 GI:16128807	TRUE	_ALIHDVPEEYAIHK_	409.469	H2O	6	y	2	371.698	29.8168	TRUE	gi	16128807 GI:16128807	16128807 GI:16128807	ASAP:ABE-0002860|UniProtKB/Swiss-Prot:P08506|EcoGene:EG10203|GeneID:945455|						GCF_000005845.2_ASM584v2_genomic_29-OCT-2014 _iRT	>gi|16128807 GI:16128807|ASAP:ABE-0002860|UniProtKB/Swiss-Prot:P08506|EcoGene:EG10203|GeneID:945455|
4	_ALIHDVPEEYAIHK_	_ALIHDVPEEYAIHK_	ALIHDVPEEYAIHK	27.6141	16128807 GI:16128807	TRUE	_ALIHDVPEEYAIHK_	409.469	NH3	6	y	2	372.19	19.1924	TRUE	gi	16128807 GI:16128807	16128807 GI:16128807	ASAP:ABE-0002860|UniProtKB/Swiss-Prot:P08506|EcoGene:EG10203|GeneID:945455|						GCF_000005845.2_ASM584v2_genomic_29-OCT-2014 _iRT	>gi|16128807 GI:16128807|ASAP:ABE-0002860|UniProtKB/Swiss-Prot:P08506|EcoGene:EG10203|GeneID:945455|
4	_ALIHDVPEEYAIHK_	_ALIHDVPEEYAIHK_	ALIHDVPEEYAIHK	27.6141	16128807 GI:16128807	TRUE	_ALIHDVPEEYAIHK_	409.469	noloss	3	y	1	397.256	63.6744	FALSE	gi	16128807 GI:16128807	16128807 GI:16128807	ASAP:ABE-0002860|UniProtKB/Swiss-Prot:P08506|EcoGene:EG10203|GeneID:945455|						GCF_000005845.2_ASM584v2_genomic_29-OCT-2014 _iRT	>gi|16128807 GI:16128807|ASAP:ABE-0002860|UniProtKB/Swiss-Prot:P08506|EcoGene:EG10203|GeneID:945455|
4	_ALIHDVPEEYAIHK_	_ALIHDVPEEYAIHK_	ALIHDVPEEYAIHK	27.6141	16128807 GI:16128807	TRUE	_ALIHDVPEEYAIHK_	409.469	noloss	4	y	1	468.293	100	FALSE	gi	16128807 GI:16128807	16128807 GI:16128807	ASAP:ABE-0002860|UniProtKB/Swiss-Prot:P08506|EcoGene:EG10203|GeneID:945455|						GCF_000005845.2_ASM584v2_genomic_29-OCT-2014 _iRT	>gi|16128807 GI:16128807|ASAP:ABE-0002860|UniProtKB/Swiss-Prot:P08506|EcoGene:EG10203|GeneID:945455|
4	_ALIHDVPEEYAIHK_	_ALIHDVPEEYAIHK_	ALIHDVPEEYAIHK	27.6141	16128807 GI:16128807	TRUE	_ALIHDVPEEYAIHK_	409.469	NH3	8	y	2	485.237	30.1193	TRUE	gi	16128807 GI:16128807	16128807 GI:16128807	ASAP:ABE-0002860|UniProtKB/Swiss-Prot:P08506|EcoGene:EG10203|GeneID:945455|						GCF_000005845.2_ASM584v2_genomic_29-OCT-2014 _iRT	>gi|16128807 GI:16128807|ASAP:ABE-0002860|UniProtKB/Swiss-Prot:P08506|EcoGene:EG10203|GeneID:945455|
4	_ALIHDVPEEYAIHK_	_ALIHDVPEEYAIHK_	ALIHDVPEEYAIHK	27.6141	16128807 GI:16128807	TRUE	_ALIHDVPEEYAIHK_	409.469	noloss	8	y	2	493.751	38.6029	TRUE	gi	16128807 GI:16128807	16128807 GI:16128807	ASAP:ABE-0002860|UniProtKB/Swiss-Prot:P08506|EcoGene:EG10203|GeneID:945455|						GCF_000005845.2_ASM584v2_genomic_29-OCT-2014 _iRT	>gi|16128807 GI:16128807|ASAP:ABE-0002860|UniProtKB/Swiss-Prot:P08506|EcoGene:EG10203|GeneID:945455|
4	_ALIHDVPEEYAIHK_	_ALIHDVPEEYAIHK_	ALIHDVPEEYAIHK	27.6141	16128807 GI:16128807	TRUE	_ALIHDVPEEYAIHK_	409.469	NH3	9	b	2	494.243	35.5656	TRUE	gi	16128807 GI:16128807	16128807 GI:16128807	ASAP:ABE-0002860|UniProtKB/Swiss-Prot:P08506|EcoGene:EG10203|GeneID:945455|						GCF_000005845.2_ASM584v2_genomic_29-OCT-2014 _iRT	>gi|16128807 GI:16128807|ASAP:ABE-0002860|UniProtKB/Swiss-Prot:P08506|EcoGene:EG10203|GeneID:945455|
4	_ALIHDVPEEYAIHK_	_ALIHDVPEEYAIHK_	ALIHDVPEEYAIHK	27.6141	16128807 GI:16128807	TRUE	_ALIHDVPEEYAIHK_	409.469	noloss	5	b	1	550.298	67.7131	FALSE	gi	16128807 GI:16128807	16128807 GI:16128807	ASAP:ABE-0002860|UniProtKB/Swiss-Prot:P08506|EcoGene:EG10203|GeneID:945455|						GCF_000005845.2_ASM584v2_genomic_29-OCT-2014 _iRT	>gi|16128807 GI:16128807|ASAP:ABE-0002860|UniProtKB/Swiss-Prot:P08506|EcoGene:EG10203|GeneID:945455|
4	_ALIHDVPEEYAIHK_	_ALIHDVPEEYAIHK_	ALIHDVPEEYAIHK	27.6141	16128807 GI:16128807	TRUE	_ALIHDVPEEYAIHK_	409.469	NH3	10	y	2	592.285	17.2565	TRUE	gi	16128807 GI:16128807	16128807 GI:16128807	ASAP:ABE-0002860|UniProtKB/Swiss-Prot:P08506|EcoGene:EG10203|GeneID:945455|						GCF_000005845.2_ASM584v2_genomic_29-OCT-2014 _iRT	>gi|16128807 GI:16128807|ASAP:ABE-0002860|UniProtKB/Swiss-Prot:P08506|EcoGene:EG10203|GeneID:945455|
4	_ALIHDVPEEYAIHK_	_ALIHDVPEEYAIHK_	ALIHDVPEEYAIHK	27.6141	16128807 GI:16128807	TRUE	_ALIHDVPEEYAIHK_	409.469	noloss	5	y	1	631.356	91.811	FALSE	gi	16128807 GI:16128807	16128807 GI:16128807	ASAP:ABE-0002860|UniProtKB/Swiss-Prot:P08506|EcoGene:EG10203|GeneID:945455|						GCF_000005845.2_ASM584v2_genomic_29-OCT-2014 _iRT	>gi|16128807 GI:16128807|ASAP:ABE-0002860|UniProtKB/Swiss-Prot:P08506|EcoGene:EG10203|GeneID:945455|
4	_ALIHDVPEEYAIHK_	_ALIHDVPEEYAIHK_	ALIHDVPEEYAIHK	27.6141	16128807 GI:16128807	TRUE	_ALIHDVPEEYAIHK_	409.469	NH3	6	b	1	632.34	30.655	TRUE	gi	16128807 GI:16128807	16128807 GI:16128807	ASAP:ABE-0002860|UniProtKB/Swiss-Prot:P08506|EcoGene:EG10203|GeneID:945455|						GCF_000005845.2_ASM584v2_genomic_29-OCT-2014 _iRT	>gi|16128807 GI:16128807|ASAP:ABE-0002860|UniProtKB/Swiss-Prot:P08506|EcoGene:EG10203|GeneID:945455|
4	_ALIHDVPEEYAIHK_	_ALIHDVPEEYAIHK_	ALIHDVPEEYAIHK	27.6141	16128807 GI:16128807	TRUE	_ALIHDVPEEYAIHK_	409.469	noloss	6	b	1	649.367	66.8696	FALSE	gi	16128807 GI:16128807	16128807 GI:16128807	ASAP:ABE-0002860|UniProtKB/Swiss-Prot:P08506|EcoGene:EG10203|GeneID:945455|						GCF_000005845.2_ASM584v2_genomic_29-OCT-2014 _iRT	>gi|16128807 GI:16128807|ASAP:ABE-0002860|UniProtKB/Swiss-Prot:P08506|EcoGene:EG10203|GeneID:945455|
4	_ALIHDVPEEYAIHK_	_ALIHDVPEEYAIHK_	ALIHDVPEEYAIHK	27.6141	16128807 GI:16128807	TRUE	_ALIHDVPEEYAIHK_	409.469	H2O	11	y	2	660.323	15.5134	TRUE	gi	16128807 GI:16128807	16128807 GI:16128807	ASAP:ABE-0002860|UniProtKB/Swiss-Prot:P08506|EcoGene:EG10203|GeneID:945455|						GCF_000005845.2_ASM584v2_genomic_29-OCT-2014 _iRT	>gi|16128807 GI:16128807|ASAP:ABE-0002860|UniProtKB/Swiss-Prot:P08506|EcoGene:EG10203|GeneID:945455|
4	_ALIHDVPEEYAIHK_	_ALIHDVPEEYAIHK_	ALIHDVPEEYAIHK	27.6141	16128807 GI:16128807	TRUE	_ALIHDVPEEYAIHK_	409.469	noloss	11	y	2	669.328	29.7418	TRUE	gi	16128807 GI:16128807	16128807 GI:16128807	ASAP:ABE-0002860|UniProtKB/Swiss-Prot:P08506|EcoGene:EG10203|GeneID:945455|						GCF_000005845.2_ASM584v2_genomic_29-OCT-2014 _iRT	>gi|16128807 GI:16128807|ASAP:ABE-0002860|UniProtKB/Swiss-Prot:P08506|EcoGene:EG10203|GeneID:945455|
4	_ALIHDVPEEYAIHK_	_ALIHDVPEEYAIHK_	ALIHDVPEEYAIHK	27.6141	16128807 GI:16128807	TRUE	_ALIHDVPEEYAIHK_	409.469	H2O	6	y	1	742.388	35.2843	TRUE	gi	16128807 GI:16128807	16128807 GI:16128807	ASAP:ABE-0002860|UniProtKB/Swiss-Prot:P08506|EcoGene:EG10203|GeneID:945455|						GCF_000005845.2_ASM584v2_genomic_29-OCT-2014 _iRT	>gi|16128807 GI:16128807|ASAP:ABE-0002860|UniProtKB/Swiss-Prot:P08506|EcoGene:EG10203|GeneID:945455|
4	_ALIHDVPEEYAIHK_	_ALIHDVPEEYAIHK_	ALIHDVPEEYAIHK	27.6141	16128807 GI:16128807	TRUE	_ALIHDVPEEYAIHK_	409.469	noloss	6	y	1	760.399	43.0617	TRUE	gi	16128807 GI:16128807	16128807 GI:16128807	ASAP:ABE-0002860|UniProtKB/Swiss-Prot:P08506|EcoGene:EG10203|GeneID:945455|						GCF_000005845.2_ASM584v2_genomic_29-OCT-2014 _iRT	>gi|16128807 GI:16128807|ASAP:ABE-0002860|UniProtKB/Swiss-Prot:P08506|EcoGene:EG10203|GeneID:945455|
4	_ALIHDVPEEYAIHK_	_ALIHDVPEEYAIHK_	ALIHDVPEEYAIHK	27.6141	16128807 GI:16128807	TRUE	_ALIHDVPEEYAIHK_	409.469	H2O	7	y	1	871.431	16.8443	TRUE	gi	16128807 GI:16128807	16128807 GI:16128807	ASAP:ABE-0002860|UniProtKB/Swiss-Prot:P08506|EcoGene:EG10203|GeneID:945455|						GCF_000005845.2_ASM584v2_genomic_29-OCT-2014 _iRT	>gi|16128807 GI:16128807|ASAP:ABE-0002860|UniProtKB/Swiss-Prot:P08506|EcoGene:EG10203|GeneID:945455|
4	_ALIHDVPEEYAIHK_	_ALIHDVPEEYAIHK_	ALIHDVPEEYAIHK	27.6141	16128807 GI:16128807	TRUE	_ALIHDVPEEYAIHK_	409.469	noloss	8	b	1	875.462	23.4834	TRUE	gi	16128807 GI:16128807	16128807 GI:16128807	ASAP:ABE-0002860|UniProtKB/Swiss-Prot:P08506|EcoGene:EG10203|GeneID:945455|						GCF_000005845.2_ASM584v2_genomic_29-OCT-2014 _iRT	>gi|16128807 GI:16128807|ASAP:ABE-0002860|UniProtKB/Swiss-Prot:P08506|EcoGene:EG10203|GeneID:945455|
4	_ALIHDVPEEYAIHK_	_ALIHDVPEEYAIHK_	ALIHDVPEEYAIHK	27.6141	16128807 GI:16128807	TRUE	_ALIHDVPEEYAIHK_	409.469	noloss	7	y	1	889.441	32.4743	TRUE	gi	16128807 GI:16128807	16128807 GI:16128807	ASAP:ABE-0002860|UniProtKB/Swiss-Prot:P08506|EcoGene:EG10203|GeneID:945455|						GCF_000005845.2_ASM584v2_genomic_29-OCT-2014 _iRT	>gi|16128807 GI:16128807|ASAP:ABE-0002860|UniProtKB/Swiss-Prot:P08506|EcoGene:EG10203|GeneID:945455|
4	_ALIHDVPEEYAIHK_	_ALIHDVPEEYAIHK_	ALIHDVPEEYAIHK	27.6141	16128807 GI:16128807	TRUE	_ALIHDVPEEYAIHK_	409.469	noloss	8	y	1	986.494	26.1449	TRUE	gi	16128807 GI:16128807	16128807 GI:16128807	ASAP:ABE-0002860|UniProtKB/Swiss-Prot:P08506|EcoGene:EG10203|GeneID:945455|						GCF_000005845.2_ASM584v2_genomic_29-OCT-2014 _iRT	>gi|16128807 GI:16128807|ASAP:ABE-0002860|UniProtKB/Swiss-Prot:P08506|EcoGene:EG10203|GeneID:945455|
4	_ALIHDVPEEYAIHK_	_ALIHDVPEEYAIHK_	ALIHDVPEEYAIHK	27.6141	16128807 GI:16128807	TRUE	_ALIHDVPEEYAIHK_	409.469	NH3	9	b	1	987.478	15.0168	TRUE	gi	16128807 GI:16128807	16128807 GI:16128807	ASAP:ABE-0002860|UniProtKB/Swiss-Prot:P08506|EcoGene:EG10203|GeneID:945455|						GCF_000005845.2_ASM584v2_genomic_29-OCT-2014 _iRT	>gi|16128807 GI:16128807|ASAP:ABE-0002860|UniProtKB/Swiss-Prot:P08506|EcoGene:EG10203|GeneID:945455|
4	_ALIHDVPEEYAIHK_	_ALIHDVPEEYAIHK_	ALIHDVPEEYAIHK	27.6141	16128807 GI:16128807	TRUE	_ALIHDVPEEYAIHK_	409.469	NH3	11	b	4	306.15	25.4944	TRUE	gi	16128807 GI:16128807	16128807 GI:16128807	ASAP:ABE-0002860|UniProtKB/Swiss-Prot:P08506|EcoGene:EG10203|GeneID:945455|						GCF_000005845.2_ASM584v2_genomic_29-OCT-2014 _iRT	>gi|16128807 GI:16128807|ASAP:ABE-0002860|UniProtKB/Swiss-Prot:P08506|EcoGene:EG10203|GeneID:945455|
4	_ALIHDVPEEYAIHK_	_ALIHDVPEEYAIHK_	ALIHDVPEEYAIHK	27.6141	16128807 GI:16128807	TRUE	_ALIHDVPEEYAIHK_	409.469	H2O	13	y	4	387.207	53.6684	FALSE	gi	16128807 GI:16128807	16128807 GI:16128807	ASAP:ABE-0002860|UniProtKB/Swiss-Prot:P08506|EcoGene:EG10203|GeneID:945455|						GCF_000005845.2_ASM584v2_genomic_29-OCT-2014 _iRT	>gi|16128807 GI:16128807|ASAP:ABE-0002860|UniProtKB/Swiss-Prot:P08506|EcoGene:EG10203|GeneID:945455|
4	_ALIHDVPEEYAIHK_	_ALIHDVPEEYAIHK_	ALIHDVPEEYAIHK	27.6141	16128807 GI:16128807	TRUE	_ALIHDVPEEYAIHK_	409.469	NH3	4	b	1	418.245	12.3144	TRUE	gi	16128807 GI:16128807	16128807 GI:16128807	ASAP:ABE-0002860|UniProtKB/Swiss-Prot:P08506|EcoGene:EG10203|GeneID:945455|						GCF_000005845.2_ASM584v2_genomic_29-OCT-2014 _iRT	>gi|16128807 GI:16128807|ASAP:ABE-0002860|UniProtKB/Swiss-Prot:P08506|EcoGene:EG10203|GeneID:945455|
4	_ALIHDVPEEYAIHK_	_ALIHDVPEEYAIHK_	ALIHDVPEEYAIHK	27.6141	16128807 GI:16128807	TRUE	_ALIHDVPEEYAIHK_	409.469	noloss	8	b	2	438.235	15.2001	TRUE	gi	16128807 GI:16128807	16128807 GI:16128807	ASAP:ABE-0002860|UniProtKB/Swiss-Prot:P08506|EcoGene:EG10203|GeneID:945455|						GCF_000005845.2_ASM584v2_genomic_29-OCT-2014 _iRT	>gi|16128807 GI:16128807|ASAP:ABE-0002860|UniProtKB/Swiss-Prot:P08506|EcoGene:EG10203|GeneID:945455|
4	_ALIHDVPEEYAIHK_	_ALIHDVPEEYAIHK_	ALIHDVPEEYAIHK	27.6141	16128807 GI:16128807	TRUE	_ALIHDVPEEYAIHK_	409.469	NH3	6	y	1	743.372	12.933	TRUE	gi	16128807 GI:16128807	16128807 GI:16128807	ASAP:ABE-0002860|UniProtKB/Swiss-Prot:P08506|EcoGene:EG10203|GeneID:945455|						GCF_000005845.2_ASM584v2_genomic_29-OCT-2014 _iRT	>gi|16128807 GI:16128807|ASAP:ABE-0002860|UniProtKB/Swiss-Prot:P08506|EcoGene:EG10203|GeneID:945455|
2	_GQETLDR_	_GQETLDR_	GQETLDR	-39.8387	16129638 GI:16129638	TRUE	_GQETLDR_	409.704	H2O	6	y	2	372.188	8.54174	TRUE	gi	16129638 GI:16129638	16129638 GI:16129638	ASAP:ABE-0005619|UniProtKB/Swiss-Prot:P77499|EcoGene:EG13964|GeneID:946128|						GCF_000005845.2_ASM584v2_genomic_29-OCT-2014 _iRT	>gi|16129638 GI:16129638|ASAP:ABE-0005619|UniProtKB/Swiss-Prot:P77499|EcoGene:EG13964|GeneID:946128|
2	_GQETLDR_	_GQETLDR_	GQETLDR	-39.8387	16129638 GI:16129638	TRUE	_GQETLDR_	409.704	NH3	3	y	1	386.203	8.1854	TRUE	gi	16129638 GI:16129638	16129638 GI:16129638	ASAP:ABE-0005619|UniProtKB/Swiss-Prot:P77499|EcoGene:EG13964|GeneID:946128|						GCF_000005845.2_ASM584v2_genomic_29-OCT-2014 _iRT	>gi|16129638 GI:16129638|ASAP:ABE-0005619|UniProtKB/Swiss-Prot:P77499|EcoGene:EG13964|GeneID:946128|
2	_GQETLDR_	_GQETLDR_	GQETLDR	-39.8387	16129638 GI:16129638	TRUE	_GQETLDR_	409.704	noloss	3	y	1	403.23	40.8008	FALSE	gi	16129638 GI:16129638	16129638 GI:16129638	ASAP:ABE-0005619|UniProtKB/Swiss-Prot:P77499|EcoGene:EG13964|GeneID:946128|						GCF_000005845.2_ASM584v2_genomic_29-OCT-2014 _iRT	>gi|16129638 GI:16129638|ASAP:ABE-0005619|UniProtKB/Swiss-Prot:P77499|EcoGene:EG13964|GeneID:946128|
2	_GQETLDR_	_GQETLDR_	GQETLDR	-39.8387	16129638 GI:16129638	TRUE	_GQETLDR_	409.704	noloss	4	y	1	504.278	79.1335	FALSE	gi	16129638 GI:16129638	16129638 GI:16129638	ASAP:ABE-0005619|UniProtKB/Swiss-Prot:P77499|EcoGene:EG13964|GeneID:946128|						GCF_000005845.2_ASM584v2_genomic_29-OCT-2014 _iRT	>gi|16129638 GI:16129638|ASAP:ABE-0005619|UniProtKB/Swiss-Prot:P77499|EcoGene:EG13964|GeneID:946128|
2	_GQETLDR_	_GQETLDR_	GQETLDR	-39.8387	16129638 GI:16129638	TRUE	_GQETLDR_	409.704	H2O	5	y	1	615.31	41.2416	FALSE	gi	16129638 GI:16129638	16129638 GI:16129638	ASAP:ABE-0005619|UniProtKB/Swiss-Prot:P77499|EcoGene:EG13964|GeneID:946128|						GCF_000005845.2_ASM584v2_genomic_29-OCT-2014 _iRT	>gi|16129638 GI:16129638|ASAP:ABE-0005619|UniProtKB/Swiss-Prot:P77499|EcoGene:EG13964|GeneID:946128|
2	_GQETLDR_	_GQETLDR_	GQETLDR	-39.8387	16129638 GI:16129638	TRUE	_GQETLDR_	409.704	NH3	5	y	1	616.294	16.0457	FALSE	gi	16129638 GI:16129638	16129638 GI:16129638	ASAP:ABE-0005619|UniProtKB/Swiss-Prot:P77499|EcoGene:EG13964|GeneID:946128|						GCF_000005845.2_ASM584v2_genomic_29-OCT-2014 _iRT	>gi|16129638 GI:16129638|ASAP:ABE-0005619|UniProtKB/Swiss-Prot:P77499|EcoGene:EG13964|GeneID:946128|
2	_GQETLDR_	_GQETLDR_	GQETLDR	-39.8387	16129638 GI:16129638	TRUE	_GQETLDR_	409.704	noloss	5	y	1	633.32	100	FALSE	gi	16129638 GI:16129638	16129638 GI:16129638	ASAP:ABE-0005619|UniProtKB/Swiss-Prot:P77499|EcoGene:EG13964|GeneID:946128|						GCF_000005845.2_ASM584v2_genomic_29-OCT-2014 _iRT	>gi|16129638 GI:16129638|ASAP:ABE-0005619|UniProtKB/Swiss-Prot:P77499|EcoGene:EG13964|GeneID:946128|
2	_GQETLDR_	_GQETLDR_	GQETLDR	-39.8387	16129638 GI:16129638	TRUE	_GQETLDR_	409.704	NH3	6	y	1	744.352	12.6797	FALSE	gi	16129638 GI:16129638	16129638 GI:16129638	ASAP:ABE-0005619|UniProtKB/Swiss-Prot:P77499|EcoGene:EG13964|GeneID:946128|						GCF_000005845.2_ASM584v2_genomic_29-OCT-2014 _iRT	>gi|16129638 GI:16129638|ASAP:ABE-0005619|UniProtKB/Swiss-Prot:P77499|EcoGene:EG13964|GeneID:946128|
2	_LGGMVWR_	_LGGMVWR_	LGGMVWR	30.2946	16128924 GI:16128924	TRUE	_LGGMVWR_	409.721	H2O	6	y	2	344.173	14.5261	FALSE	gi	16128924 GI:16128924	16128924 GI:16128924	ASAP:ABE-0003240|UniProtKB/Swiss-Prot:P0A910|EcoGene:EG10669|GeneID:945571|						GCF_000005845.2_ASM584v2_genomic_29-OCT-2014 _iRT	>gi|16128924 GI:16128924|ASAP:ABE-0003240|UniProtKB/Swiss-Prot:P0A910|EcoGene:EG10669|GeneID:945571|
2	_LGGMVWR_	_LGGMVWR_	LGGMVWR	30.2946	16128924 GI:16128924	TRUE	_LGGMVWR_	409.721	noloss	3	y	1	460.267	14.3078	FALSE	gi	16128924 GI:16128924	16128924 GI:16128924	ASAP:ABE-0003240|UniProtKB/Swiss-Prot:P0A910|EcoGene:EG10669|GeneID:945571|						GCF_000005845.2_ASM584v2_genomic_29-OCT-2014 _iRT	>gi|16128924 GI:16128924|ASAP:ABE-0003240|UniProtKB/Swiss-Prot:P0A910|EcoGene:EG10669|GeneID:945571|
2	_LGGMVWR_	_LGGMVWR_	LGGMVWR	30.2946	16128924 GI:16128924	TRUE	_LGGMVWR_	409.721	noloss	4	y	1	591.307	5.26311	FALSE	gi	16128924 GI:16128924	16128924 GI:16128924	ASAP:ABE-0003240|UniProtKB/Swiss-Prot:P0A910|EcoGene:EG10669|GeneID:945571|						GCF_000005845.2_ASM584v2_genomic_29-OCT-2014 _iRT	>gi|16128924 GI:16128924|ASAP:ABE-0003240|UniProtKB/Swiss-Prot:P0A910|EcoGene:EG10669|GeneID:945571|
2	_LGGMVWR_	_LGGMVWR_	LGGMVWR	30.2946	16128924 GI:16128924	TRUE	_LGGMVWR_	409.721	noloss	5	y	1	648.329	31.5258	FALSE	gi	16128924 GI:16128924	16128924 GI:16128924	ASAP:ABE-0003240|UniProtKB/Swiss-Prot:P0A910|EcoGene:EG10669|GeneID:945571|						GCF_000005845.2_ASM584v2_genomic_29-OCT-2014 _iRT	>gi|16128924 GI:16128924|ASAP:ABE-0003240|UniProtKB/Swiss-Prot:P0A910|EcoGene:EG10669|GeneID:945571|
2	_LGGMVWR_	_LGGMVWR_	LGGMVWR	30.2946	16128924 GI:16128924	TRUE	_LGGMVWR_	409.721	noloss	6	y	1	705.35	100	FALSE	gi	16128924 GI:16128924	16128924 GI:16128924	ASAP:ABE-0003240|UniProtKB/Swiss-Prot:P0A910|EcoGene:EG10669|GeneID:945571|						GCF_000005845.2_ASM584v2_genomic_29-OCT-2014 _iRT	>gi|16128924 GI:16128924|ASAP:ABE-0003240|UniProtKB/Swiss-Prot:P0A910|EcoGene:EG10669|GeneID:945571|
2	_DSVIGLSK_	_DSVIGLSK_	DSVIGLSK	3.01356	16130091 GI:16130091	TRUE	_DSVIGLSK_	409.735	noloss	3	b	1	302.135	6.89334	FALSE	gi	16130091 GI:16130091	16130091 GI:16130091	ASAP:ABE-0007117|UniProtKB/Swiss-Prot:P0A6T5|EcoGene:EG11375|GeneID:949040|						GCF_000005845.2_ASM584v2_genomic_29-OCT-2014 _iRT	>gi|16130091 GI:16130091|ASAP:ABE-0007117|UniProtKB/Swiss-Prot:P0A6T5|EcoGene:EG11375|GeneID:949040|
2	_DSVIGLSK_	_DSVIGLSK_	DSVIGLSK	3.01356	16130091 GI:16130091	TRUE	_DSVIGLSK_	409.735	noloss	3	y	1	347.229	15.4123	FALSE	gi	16130091 GI:16130091	16130091 GI:16130091	ASAP:ABE-0007117|UniProtKB/Swiss-Prot:P0A6T5|EcoGene:EG11375|GeneID:949040|						GCF_000005845.2_ASM584v2_genomic_29-OCT-2014 _iRT	>gi|16130091 GI:16130091|ASAP:ABE-0007117|UniProtKB/Swiss-Prot:P0A6T5|EcoGene:EG11375|GeneID:949040|
2	_DSVIGLSK_	_DSVIGLSK_	DSVIGLSK	3.01356	16130091 GI:16130091	TRUE	_DSVIGLSK_	409.735	noloss	4	y	1	404.25	94.6971	FALSE	gi	16130091 GI:16130091	16130091 GI:16130091	ASAP:ABE-0007117|UniProtKB/Swiss-Prot:P0A6T5|EcoGene:EG11375|GeneID:949040|						GCF_000005845.2_ASM584v2_genomic_29-OCT-2014 _iRT	>gi|16130091 GI:16130091|ASAP:ABE-0007117|UniProtKB/Swiss-Prot:P0A6T5|EcoGene:EG11375|GeneID:949040|
2	_DSVIGLSK_	_DSVIGLSK_	DSVIGLSK	3.01356	16130091 GI:16130091	TRUE	_DSVIGLSK_	409.735	H2O	5	y	1	499.324	6.82933	FALSE	gi	16130091 GI:16130091	16130091 GI:16130091	ASAP:ABE-0007117|UniProtKB/Swiss-Prot:P0A6T5|EcoGene:EG11375|GeneID:949040|						GCF_000005845.2_ASM584v2_genomic_29-OCT-2014 _iRT	>gi|16130091 GI:16130091|ASAP:ABE-0007117|UniProtKB/Swiss-Prot:P0A6T5|EcoGene:EG11375|GeneID:949040|
2	_DSVIGLSK_	_DSVIGLSK_	DSVIGLSK	3.01356	16130091 GI:16130091	TRUE	_DSVIGLSK_	409.735	noloss	5	y	1	517.334	100	FALSE	gi	16130091 GI:16130091	16130091 GI:16130091	ASAP:ABE-0007117|UniProtKB/Swiss-Prot:P0A6T5|EcoGene:EG11375|GeneID:949040|						GCF_000005845.2_ASM584v2_genomic_29-OCT-2014 _iRT	>gi|16130091 GI:16130091|ASAP:ABE-0007117|UniProtKB/Swiss-Prot:P0A6T5|EcoGene:EG11375|GeneID:949040|
2	_DSVIGLSK_	_DSVIGLSK_	DSVIGLSK	3.01356	16130091 GI:16130091	TRUE	_DSVIGLSK_	409.735	noloss	6	y	1	616.403	31.9018	FALSE	gi	16130091 GI:16130091	16130091 GI:16130091	ASAP:ABE-0007117|UniProtKB/Swiss-Prot:P0A6T5|EcoGene:EG11375|GeneID:949040|						GCF_000005845.2_ASM584v2_genomic_29-OCT-2014 _iRT	>gi|16130091 GI:16130091|ASAP:ABE-0007117|UniProtKB/Swiss-Prot:P0A6T5|EcoGene:EG11375|GeneID:949040|
2	_AFALAGLR_	_AFALAGLR_	AFALAGLR	40.1662	16129962 GI:16129962	TRUE	_AFALAGLR_	409.748	NH3	3	y	1	328.198	7.10985	FALSE	gi	16129962 GI:16129962	16129962 GI:16129962	ASAP:ABE-0006717|UniProtKB/Swiss-Prot:P06986|EcoGene:EG10446|GeneID:946551|						GCF_000005845.2_ASM584v2_genomic_29-OCT-2014 _iRT	>gi|16129962 GI:16129962|ASAP:ABE-0006717|UniProtKB/Swiss-Prot:P06986|EcoGene:EG10446|GeneID:946551|
2	_AFALAGLR_	_AFALAGLR_	AFALAGLR	40.1662	16129962 GI:16129962	TRUE	_AFALAGLR_	409.748	noloss	3	y	1	345.224	15.7842	FALSE	gi	16129962 GI:16129962	16129962 GI:16129962	ASAP:ABE-0006717|UniProtKB/Swiss-Prot:P06986|EcoGene:EG10446|GeneID:946551|						GCF_000005845.2_ASM584v2_genomic_29-OCT-2014 _iRT	>gi|16129962 GI:16129962|ASAP:ABE-0006717|UniProtKB/Swiss-Prot:P06986|EcoGene:EG10446|GeneID:946551|
2	_AFALAGLR_	_AFALAGLR_	AFALAGLR	40.1662	16129962 GI:16129962	TRUE	_AFALAGLR_	409.748	NH3	4	y	1	399.235	7.75962	FALSE	gi	16129962 GI:16129962	16129962 GI:16129962	ASAP:ABE-0006717|UniProtKB/Swiss-Prot:P06986|EcoGene:EG10446|GeneID:946551|						GCF_000005845.2_ASM584v2_genomic_29-OCT-2014 _iRT	>gi|16129962 GI:16129962|ASAP:ABE-0006717|UniProtKB/Swiss-Prot:P06986|EcoGene:EG10446|GeneID:946551|
2	_AFALAGLR_	_AFALAGLR_	AFALAGLR	40.1662	16129962 GI:16129962	TRUE	_AFALAGLR_	409.748	noloss	4	y	1	416.262	46.5196	FALSE	gi	16129962 GI:16129962	16129962 GI:16129962	ASAP:ABE-0006717|UniProtKB/Swiss-Prot:P06986|EcoGene:EG10446|GeneID:946551|						GCF_000005845.2_ASM584v2_genomic_29-OCT-2014 _iRT	>gi|16129962 GI:16129962|ASAP:ABE-0006717|UniProtKB/Swiss-Prot:P06986|EcoGene:EG10446|GeneID:946551|
2	_AFALAGLR_	_AFALAGLR_	AFALAGLR	40.1662	16129962 GI:16129962	TRUE	_AFALAGLR_	409.748	noloss	5	y	1	529.346	44.7503	FALSE	gi	16129962 GI:16129962	16129962 GI:16129962	ASAP:ABE-0006717|UniProtKB/Swiss-Prot:P06986|EcoGene:EG10446|GeneID:946551|						GCF_000005845.2_ASM584v2_genomic_29-OCT-2014 _iRT	>gi|16129962 GI:16129962|ASAP:ABE-0006717|UniProtKB/Swiss-Prot:P06986|EcoGene:EG10446|GeneID:946551|
2	_AFALAGLR_	_AFALAGLR_	AFALAGLR	40.1662	16129962 GI:16129962	TRUE	_AFALAGLR_	409.748	noloss	6	y	1	600.383	100	FALSE	gi	16129962 GI:16129962	16129962 GI:16129962	ASAP:ABE-0006717|UniProtKB/Swiss-Prot:P06986|EcoGene:EG10446|GeneID:946551|						GCF_000005845.2_ASM584v2_genomic_29-OCT-2014 _iRT	>gi|16129962 GI:16129962|ASAP:ABE-0006717|UniProtKB/Swiss-Prot:P06986|EcoGene:EG10446|GeneID:946551|
2	_KVTTLTR_	_KVTTLTR_	KVTTLTR	-47.5386	16131307 GI:16131307	TRUE	_KVTTLTR_	409.758	noloss	4	y	1	490.298	13.4194	FALSE	gi	16131307 GI:16131307	16131307 GI:16131307	ASAP:ABE-0011211|UniProtKB/Swiss-Prot:P0A9Q9|EcoGene:EG10088|GeneID:947939|						GCF_000005845.2_ASM584v2_genomic_29-OCT-2014 _iRT	>gi|16131307 GI:16131307|ASAP:ABE-0011211|UniProtKB/Swiss-Prot:P0A9Q9|EcoGene:EG10088|GeneID:947939|
2	_KVTTLTR_	_KVTTLTR_	KVTTLTR	-47.5386	16131307 GI:16131307	TRUE	_KVTTLTR_	409.758	noloss	5	y	1	591.346	100	FALSE	gi	16131307 GI:16131307	16131307 GI:16131307	ASAP:ABE-0011211|UniProtKB/Swiss-Prot:P0A9Q9|EcoGene:EG10088|GeneID:947939|						GCF_000005845.2_ASM584v2_genomic_29-OCT-2014 _iRT	>gi|16131307 GI:16131307|ASAP:ABE-0011211|UniProtKB/Swiss-Prot:P0A9Q9|EcoGene:EG10088|GeneID:947939|
2	_KVTTLTR_	_KVTTLTR_	KVTTLTR	-47.5386	16131307 GI:16131307	TRUE	_KVTTLTR_	409.758	noloss	6	y	1	690.414	52.1521	FALSE	gi	16131307 GI:16131307	16131307 GI:16131307	ASAP:ABE-0011211|UniProtKB/Swiss-Prot:P0A9Q9|EcoGene:EG10088|GeneID:947939|						GCF_000005845.2_ASM584v2_genomic_29-OCT-2014 _iRT	>gi|16131307 GI:16131307|ASAP:ABE-0011211|UniProtKB/Swiss-Prot:P0A9Q9|EcoGene:EG10088|GeneID:947939|
2	_VMDAIDR_	_VMDAIDR_	VMDAIDR	-10.1782	16131000 GI:16131000	TRUE	_VMDAIDR_	410.205	NH3	3	y	1	386.203	5.67551	FALSE	gi	16131000 GI:16131000	16131000 GI:16131000	ASAP:ABE-0010213|UniProtKB/Swiss-Prot:P67660|EcoGene:EG12749|GeneID:947621|						GCF_000005845.2_ASM584v2_genomic_29-OCT-2014 _iRT	>gi|16131000 GI:16131000|ASAP:ABE-0010213|UniProtKB/Swiss-Prot:P67660|EcoGene:EG12749|GeneID:947621|
2	_VMDAIDR_	_VMDAIDR_	VMDAIDR	-10.1782	16131000 GI:16131000	TRUE	_VMDAIDR_	410.205	noloss	3	y	1	403.23	8.78512	FALSE	gi	16131000 GI:16131000	16131000 GI:16131000	ASAP:ABE-0010213|UniProtKB/Swiss-Prot:P67660|EcoGene:EG12749|GeneID:947621|						GCF_000005845.2_ASM584v2_genomic_29-OCT-2014 _iRT	>gi|16131000 GI:16131000|ASAP:ABE-0010213|UniProtKB/Swiss-Prot:P67660|EcoGene:EG12749|GeneID:947621|
2	_VMDAIDR_	_VMDAIDR_	VMDAIDR	-10.1782	16131000 GI:16131000	TRUE	_VMDAIDR_	410.205	noloss	4	y	1	474.267	56.5244	FALSE	gi	16131000 GI:16131000	16131000 GI:16131000	ASAP:ABE-0010213|UniProtKB/Swiss-Prot:P67660|EcoGene:EG12749|GeneID:947621|						GCF_000005845.2_ASM584v2_genomic_29-OCT-2014 _iRT	>gi|16131000 GI:16131000|ASAP:ABE-0010213|UniProtKB/Swiss-Prot:P67660|EcoGene:EG12749|GeneID:947621|
2	_VMDAIDR_	_VMDAIDR_	VMDAIDR	-10.1782	16131000 GI:16131000	TRUE	_VMDAIDR_	410.205	NH3	5	y	1	572.267	6.02155	FALSE	gi	16131000 GI:16131000	16131000 GI:16131000	ASAP:ABE-0010213|UniProtKB/Swiss-Prot:P67660|EcoGene:EG12749|GeneID:947621|						GCF_000005845.2_ASM584v2_genomic_29-OCT-2014 _iRT	>gi|16131000 GI:16131000|ASAP:ABE-0010213|UniProtKB/Swiss-Prot:P67660|EcoGene:EG12749|GeneID:947621|
2	_VMDAIDR_	_VMDAIDR_	VMDAIDR	-10.1782	16131000 GI:16131000	TRUE	_VMDAIDR_	410.205	noloss	5	y	1	589.294	100	FALSE	gi	16131000 GI:16131000	16131000 GI:16131000	ASAP:ABE-0010213|UniProtKB/Swiss-Prot:P67660|EcoGene:EG12749|GeneID:947621|						GCF_000005845.2_ASM584v2_genomic_29-OCT-2014 _iRT	>gi|16131000 GI:16131000|ASAP:ABE-0010213|UniProtKB/Swiss-Prot:P67660|EcoGene:EG12749|GeneID:947621|
2	_VMDAIDR_	_VMDAIDR_	VMDAIDR	-10.1782	16131000 GI:16131000	TRUE	_VMDAIDR_	410.205	noloss	6	y	1	720.335	59.1913	FALSE	gi	16131000 GI:16131000	16131000 GI:16131000	ASAP:ABE-0010213|UniProtKB/Swiss-Prot:P67660|EcoGene:EG12749|GeneID:947621|						GCF_000005845.2_ASM584v2_genomic_29-OCT-2014 _iRT	>gi|16131000 GI:16131000|ASAP:ABE-0010213|UniProtKB/Swiss-Prot:P67660|EcoGene:EG12749|GeneID:947621|
2	_VGINGFGR_	_VGINGFGR_	VGINGFGR	14.3948	16129733 GI:16129733	TRUE	_VGINGFGR_	410.227	noloss	3	y	1	379.209	7.55998	TRUE	gi	16129733 GI:16129733	16129733 GI:16129733	ASAP:ABE-0005920|UniProtKB/Swiss-Prot:P0A9B2|EcoGene:EG10367|GeneID:947679|						GCF_000005845.2_ASM584v2_genomic_29-OCT-2014 _iRT	>gi|16129733 GI:16129733|ASAP:ABE-0005920|UniProtKB/Swiss-Prot:P0A9B2|EcoGene:EG10367|GeneID:947679|
2	_VGINGFGR_	_VGINGFGR_	VGINGFGR	14.3948	16129733 GI:16129733	TRUE	_VGINGFGR_	410.227	H2O	5	b	1	423.235	5.87386	TRUE	gi	16129733 GI:16129733	16129733 GI:16129733	ASAP:ABE-0005920|UniProtKB/Swiss-Prot:P0A9B2|EcoGene:EG10367|GeneID:947679|						GCF_000005845.2_ASM584v2_genomic_29-OCT-2014 _iRT	>gi|16129733 GI:16129733|ASAP:ABE-0005920|UniProtKB/Swiss-Prot:P0A9B2|EcoGene:EG10367|GeneID:947679|
2	_VGINGFGR_	_VGINGFGR_	VGINGFGR	14.3948	16129733 GI:16129733	TRUE	_VGINGFGR_	410.227	noloss	4	y	1	436.23	39.2316	FALSE	gi	16129733 GI:16129733	16129733 GI:16129733	ASAP:ABE-0005920|UniProtKB/Swiss-Prot:P0A9B2|EcoGene:EG10367|GeneID:947679|						GCF_000005845.2_ASM584v2_genomic_29-OCT-2014 _iRT	>gi|16129733 GI:16129733|ASAP:ABE-0005920|UniProtKB/Swiss-Prot:P0A9B2|EcoGene:EG10367|GeneID:947679|
2	_VGINGFGR_	_VGINGFGR_	VGINGFGR	14.3948	16129733 GI:16129733	TRUE	_VGINGFGR_	410.227	NH3	5	y	1	533.247	27.6642	FALSE	gi	16129733 GI:16129733	16129733 GI:16129733	ASAP:ABE-0005920|UniProtKB/Swiss-Prot:P0A9B2|EcoGene:EG10367|GeneID:947679|						GCF_000005845.2_ASM584v2_genomic_29-OCT-2014 _iRT	>gi|16129733 GI:16129733|ASAP:ABE-0005920|UniProtKB/Swiss-Prot:P0A9B2|EcoGene:EG10367|GeneID:947679|
2	_VGINGFGR_	_VGINGFGR_	VGINGFGR	14.3948	16129733 GI:16129733	TRUE	_VGINGFGR_	410.227	noloss	5	y	1	550.273	100	FALSE	gi	16129733 GI:16129733	16129733 GI:16129733	ASAP:ABE-0005920|UniProtKB/Swiss-Prot:P0A9B2|EcoGene:EG10367|GeneID:947679|						GCF_000005845.2_ASM584v2_genomic_29-OCT-2014 _iRT	>gi|16129733 GI:16129733|ASAP:ABE-0005920|UniProtKB/Swiss-Prot:P0A9B2|EcoGene:EG10367|GeneID:947679|
2	_VGINGFGR_	_VGINGFGR_	VGINGFGR	14.3948	16129733 GI:16129733	TRUE	_VGINGFGR_	410.227	noloss	6	y	1	663.357	18.7244	FALSE	gi	16129733 GI:16129733	16129733 GI:16129733	ASAP:ABE-0005920|UniProtKB/Swiss-Prot:P0A9B2|EcoGene:EG10367|GeneID:947679|						GCF_000005845.2_ASM584v2_genomic_29-OCT-2014 _iRT	>gi|16129733 GI:16129733|ASAP:ABE-0005920|UniProtKB/Swiss-Prot:P0A9B2|EcoGene:EG10367|GeneID:947679|
2	_VGINGFGR_	_VGINGFGR_	VGINGFGR	14.3948	16129733 GI:16129733	TRUE	_VGINGFGR_	410.227	NH3	7	y	1	703.352	10.4293	FALSE	gi	16129733 GI:16129733	16129733 GI:16129733	ASAP:ABE-0005920|UniProtKB/Swiss-Prot:P0A9B2|EcoGene:EG10367|GeneID:947679|						GCF_000005845.2_ASM584v2_genomic_29-OCT-2014 _iRT	>gi|16129733 GI:16129733|ASAP:ABE-0005920|UniProtKB/Swiss-Prot:P0A9B2|EcoGene:EG10367|GeneID:947679|
2	_VGINGFGR_	_VGINGFGR_	VGINGFGR	14.3948	16129733 GI:16129733	TRUE	_VGINGFGR_	410.227	noloss	7	y	1	720.379	88.068	FALSE	gi	16129733 GI:16129733	16129733 GI:16129733	ASAP:ABE-0005920|UniProtKB/Swiss-Prot:P0A9B2|EcoGene:EG10367|GeneID:947679|						GCF_000005845.2_ASM584v2_genomic_29-OCT-2014 _iRT	>gi|16129733 GI:16129733|ASAP:ABE-0005920|UniProtKB/Swiss-Prot:P0A9B2|EcoGene:EG10367|GeneID:947679|
2	_YLGPTIR_	_YLGPTIR_	YLGPTIR	10.0563	16130913 GI:16130913	TRUE	_YLGPTIR_	410.24	noloss	4	y	1	486.303	10.3244	FALSE	gi	16130913 GI:16130913	16130913 GI:16130913	ASAP:ABE-0009905|UniProtKB/Swiss-Prot:P26648|EcoGene:EG11376|GeneID:944982|						GCF_000005845.2_ASM584v2_genomic_29-OCT-2014 _iRT	>gi|16130913 GI:16130913|ASAP:ABE-0009905|UniProtKB/Swiss-Prot:P26648|EcoGene:EG11376|GeneID:944982|
2	_YLGPTIR_	_YLGPTIR_	YLGPTIR	10.0563	16130913 GI:16130913	TRUE	_YLGPTIR_	410.24	NH3	5	y	1	526.298	8.89232	FALSE	gi	16130913 GI:16130913	16130913 GI:16130913	ASAP:ABE-0009905|UniProtKB/Swiss-Prot:P26648|EcoGene:EG11376|GeneID:944982|						GCF_000005845.2_ASM584v2_genomic_29-OCT-2014 _iRT	>gi|16130913 GI:16130913|ASAP:ABE-0009905|UniProtKB/Swiss-Prot:P26648|EcoGene:EG11376|GeneID:944982|
2	_YLGPTIR_	_YLGPTIR_	YLGPTIR	10.0563	16130913 GI:16130913	TRUE	_YLGPTIR_	410.24	noloss	5	y	1	543.325	100	FALSE	gi	16130913 GI:16130913	16130913 GI:16130913	ASAP:ABE-0009905|UniProtKB/Swiss-Prot:P26648|EcoGene:EG11376|GeneID:944982|						GCF_000005845.2_ASM584v2_genomic_29-OCT-2014 _iRT	>gi|16130913 GI:16130913|ASAP:ABE-0009905|UniProtKB/Swiss-Prot:P26648|EcoGene:EG11376|GeneID:944982|
2	_YLGPTIR_	_YLGPTIR_	YLGPTIR	10.0563	16130913 GI:16130913	TRUE	_YLGPTIR_	410.24	noloss	6	y	1	656.409	21.1204	FALSE	gi	16130913 GI:16130913	16130913 GI:16130913	ASAP:ABE-0009905|UniProtKB/Swiss-Prot:P26648|EcoGene:EG11376|GeneID:944982|						GCF_000005845.2_ASM584v2_genomic_29-OCT-2014 _iRT	>gi|16130913 GI:16130913|ASAP:ABE-0009905|UniProtKB/Swiss-Prot:P26648|EcoGene:EG11376|GeneID:944982|
2	_IC[+57]TLGEK_	_IC[Carbamidomethyl]TLGEK_	ICTLGEK	-23.3251	49176395 GI:49176395	TRUE	_IC[Carbamidomethyl]TLGEK_	410.715	noloss	3	y	1	333.177	64.8344	FALSE	gi	49176395 GI:49176395	49176395 GI:49176395	ASAP:ABE-0012093|UniProtKB/Swiss-Prot:P0AES6|EcoGene:EG10424|GeneID:948211|						GCF_000005845.2_ASM584v2_genomic_29-OCT-2014 _iRT	>gi|49176395 GI:49176395|ASAP:ABE-0012093|UniProtKB/Swiss-Prot:P0AES6|EcoGene:EG10424|GeneID:948211|
2	_IC[+57]TLGEK_	_IC[Carbamidomethyl]TLGEK_	ICTLGEK	-23.3251	49176395 GI:49176395	TRUE	_IC[Carbamidomethyl]TLGEK_	410.715	H2O	3	b	1	357.159	12.3813	FALSE	gi	49176395 GI:49176395	49176395 GI:49176395	ASAP:ABE-0012093|UniProtKB/Swiss-Prot:P0AES6|EcoGene:EG10424|GeneID:948211|						GCF_000005845.2_ASM584v2_genomic_29-OCT-2014 _iRT	>gi|49176395 GI:49176395|ASAP:ABE-0012093|UniProtKB/Swiss-Prot:P0AES6|EcoGene:EG10424|GeneID:948211|
2	_IC[+57]TLGEK_	_IC[Carbamidomethyl]TLGEK_	ICTLGEK	-23.3251	49176395 GI:49176395	TRUE	_IC[Carbamidomethyl]TLGEK_	410.715	noloss	3	b	1	375.17	8.47001	TRUE	gi	49176395 GI:49176395	49176395 GI:49176395	ASAP:ABE-0012093|UniProtKB/Swiss-Prot:P0AES6|EcoGene:EG10424|GeneID:948211|						GCF_000005845.2_ASM584v2_genomic_29-OCT-2014 _iRT	>gi|49176395 GI:49176395|ASAP:ABE-0012093|UniProtKB/Swiss-Prot:P0AES6|EcoGene:EG10424|GeneID:948211|
2	_IC[+57]TLGEK_	_IC[Carbamidomethyl]TLGEK_	ICTLGEK	-23.3251	49176395 GI:49176395	TRUE	_IC[Carbamidomethyl]TLGEK_	410.715	noloss	4	y	1	446.261	33.3237	FALSE	gi	49176395 GI:49176395	49176395 GI:49176395	ASAP:ABE-0012093|UniProtKB/Swiss-Prot:P0AES6|EcoGene:EG10424|GeneID:948211|						GCF_000005845.2_ASM584v2_genomic_29-OCT-2014 _iRT	>gi|49176395 GI:49176395|ASAP:ABE-0012093|UniProtKB/Swiss-Prot:P0AES6|EcoGene:EG10424|GeneID:948211|
2	_IC[+57]TLGEK_	_IC[Carbamidomethyl]TLGEK_	ICTLGEK	-23.3251	49176395 GI:49176395	TRUE	_IC[Carbamidomethyl]TLGEK_	410.715	noloss	5	y	1	547.309	57.2449	FALSE	gi	49176395 GI:49176395	49176395 GI:49176395	ASAP:ABE-0012093|UniProtKB/Swiss-Prot:P0AES6|EcoGene:EG10424|GeneID:948211|						GCF_000005845.2_ASM584v2_genomic_29-OCT-2014 _iRT	>gi|49176395 GI:49176395|ASAP:ABE-0012093|UniProtKB/Swiss-Prot:P0AES6|EcoGene:EG10424|GeneID:948211|
2	_IC[+57]TLGEK_	_IC[Carbamidomethyl]TLGEK_	ICTLGEK	-23.3251	49176395 GI:49176395	TRUE	_IC[Carbamidomethyl]TLGEK_	410.715	H2O	6	y	1	689.329	10.3009	FALSE	gi	49176395 GI:49176395	49176395 GI:49176395	ASAP:ABE-0012093|UniProtKB/Swiss-Prot:P0AES6|EcoGene:EG10424|GeneID:948211|						GCF_000005845.2_ASM584v2_genomic_29-OCT-2014 _iRT	>gi|49176395 GI:49176395|ASAP:ABE-0012093|UniProtKB/Swiss-Prot:P0AES6|EcoGene:EG10424|GeneID:948211|
2	_IC[+57]TLGEK_	_IC[Carbamidomethyl]TLGEK_	ICTLGEK	-23.3251	49176395 GI:49176395	TRUE	_IC[Carbamidomethyl]TLGEK_	410.715	NH3	6	y	1	690.313	9.62581	TRUE	gi	49176395 GI:49176395	49176395 GI:49176395	ASAP:ABE-0012093|UniProtKB/Swiss-Prot:P0AES6|EcoGene:EG10424|GeneID:948211|						GCF_000005845.2_ASM584v2_genomic_29-OCT-2014 _iRT	>gi|49176395 GI:49176395|ASAP:ABE-0012093|UniProtKB/Swiss-Prot:P0AES6|EcoGene:EG10424|GeneID:948211|
2	_IC[+57]TLGEK_	_IC[Carbamidomethyl]TLGEK_	ICTLGEK	-23.3251	49176395 GI:49176395	TRUE	_IC[Carbamidomethyl]TLGEK_	410.715	noloss	6	y	1	707.339	100	FALSE	gi	49176395 GI:49176395	49176395 GI:49176395	ASAP:ABE-0012093|UniProtKB/Swiss-Prot:P0AES6|EcoGene:EG10424|GeneID:948211|						GCF_000005845.2_ASM584v2_genomic_29-OCT-2014 _iRT	>gi|49176395 GI:49176395|ASAP:ABE-0012093|UniProtKB/Swiss-Prot:P0AES6|EcoGene:EG10424|GeneID:948211|
3	_AAFNQMVQGHK_	_AAFNQMVQGHK_	AAFNQMVQGHK	-4.34261	16128206 GI:16128206	TRUE	_AAFNQMVQGHK_	410.873	H2O	6	b	2	323.144	21.1833	TRUE	gi	16128206 GI:16128206	16128206 GI:16128206	ASAP:ABE-0000740|UniProtKB/Swiss-Prot:P0AD59|EcoGene:EG13547|GeneID:946530|						GCF_000005845.2_ASM584v2_genomic_29-OCT-2014 _iRT	>gi|16128206 GI:16128206|ASAP:ABE-0000740|UniProtKB/Swiss-Prot:P0AD59|EcoGene:EG13547|GeneID:946530|
3	_AAFNQMVQGHK_	_AAFNQMVQGHK_	AAFNQMVQGHK	-4.34261	16128206 GI:16128206	TRUE	_AAFNQMVQGHK_	410.873	H2O	3	y	1	323.183	9.17026	TRUE	gi	16128206 GI:16128206	16128206 GI:16128206	ASAP:ABE-0000740|UniProtKB/Swiss-Prot:P0AD59|EcoGene:EG13547|GeneID:946530|						GCF_000005845.2_ASM584v2_genomic_29-OCT-2014 _iRT	>gi|16128206 GI:16128206|ASAP:ABE-0000740|UniProtKB/Swiss-Prot:P0AD59|EcoGene:EG13547|GeneID:946530|
3	_AAFNQMVQGHK_	_AAFNQMVQGHK_	AAFNQMVQGHK	-4.34261	16128206 GI:16128206	TRUE	_AAFNQMVQGHK_	410.873	noloss	3	y	1	341.193	65.8057	FALSE	gi	16128206 GI:16128206	16128206 GI:16128206	ASAP:ABE-0000740|UniProtKB/Swiss-Prot:P0AD59|EcoGene:EG13547|GeneID:946530|						GCF_000005845.2_ASM584v2_genomic_29-OCT-2014 _iRT	>gi|16128206 GI:16128206|ASAP:ABE-0000740|UniProtKB/Swiss-Prot:P0AD59|EcoGene:EG13547|GeneID:946530|
3	_AAFNQMVQGHK_	_AAFNQMVQGHK_	AAFNQMVQGHK	-4.34261	16128206 GI:16128206	TRUE	_AAFNQMVQGHK_	410.873	noloss	10	b	3	362.171	5.73623	TRUE	gi	16128206 GI:16128206	16128206 GI:16128206	ASAP:ABE-0000740|UniProtKB/Swiss-Prot:P0AD59|EcoGene:EG13547|GeneID:946530|						GCF_000005845.2_ASM584v2_genomic_29-OCT-2014 _iRT	>gi|16128206 GI:16128206|ASAP:ABE-0000740|UniProtKB/Swiss-Prot:P0AD59|EcoGene:EG13547|GeneID:946530|
3	_AAFNQMVQGHK_	_AAFNQMVQGHK_	AAFNQMVQGHK	-4.34261	16128206 GI:16128206	TRUE	_AAFNQMVQGHK_	410.873	noloss	4	b	1	404.193	8.55335	TRUE	gi	16128206 GI:16128206	16128206 GI:16128206	ASAP:ABE-0000740|UniProtKB/Swiss-Prot:P0AD59|EcoGene:EG13547|GeneID:946530|						GCF_000005845.2_ASM584v2_genomic_29-OCT-2014 _iRT	>gi|16128206 GI:16128206|ASAP:ABE-0000740|UniProtKB/Swiss-Prot:P0AD59|EcoGene:EG13547|GeneID:946530|
3	_AAFNQMVQGHK_	_AAFNQMVQGHK_	AAFNQMVQGHK	-4.34261	16128206 GI:16128206	TRUE	_AAFNQMVQGHK_	410.873	H2O	7	y	2	405.208	24.1732	TRUE	gi	16128206 GI:16128206	16128206 GI:16128206	ASAP:ABE-0000740|UniProtKB/Swiss-Prot:P0AD59|EcoGene:EG13547|GeneID:946530|						GCF_000005845.2_ASM584v2_genomic_29-OCT-2014 _iRT	>gi|16128206 GI:16128206|ASAP:ABE-0000740|UniProtKB/Swiss-Prot:P0AD59|EcoGene:EG13547|GeneID:946530|
3	_AAFNQMVQGHK_	_AAFNQMVQGHK_	AAFNQMVQGHK	-4.34261	16128206 GI:16128206	TRUE	_AAFNQMVQGHK_	410.873	NH3	7	y	2	405.7	23.0812	TRUE	gi	16128206 GI:16128206	16128206 GI:16128206	ASAP:ABE-0000740|UniProtKB/Swiss-Prot:P0AD59|EcoGene:EG13547|GeneID:946530|						GCF_000005845.2_ASM584v2_genomic_29-OCT-2014 _iRT	>gi|16128206 GI:16128206|ASAP:ABE-0000740|UniProtKB/Swiss-Prot:P0AD59|EcoGene:EG13547|GeneID:946530|
3	_AAFNQMVQGHK_	_AAFNQMVQGHK_	AAFNQMVQGHK	-4.34261	16128206 GI:16128206	TRUE	_AAFNQMVQGHK_	410.873	noloss	7	y	2	414.213	6.45682	TRUE	gi	16128206 GI:16128206	16128206 GI:16128206	ASAP:ABE-0000740|UniProtKB/Swiss-Prot:P0AD59|EcoGene:EG13547|GeneID:946530|						GCF_000005845.2_ASM584v2_genomic_29-OCT-2014 _iRT	>gi|16128206 GI:16128206|ASAP:ABE-0000740|UniProtKB/Swiss-Prot:P0AD59|EcoGene:EG13547|GeneID:946530|
3	_AAFNQMVQGHK_	_AAFNQMVQGHK_	AAFNQMVQGHK	-4.34261	16128206 GI:16128206	TRUE	_AAFNQMVQGHK_	410.873	noloss	8	b	2	445.713	6.70615	TRUE	gi	16128206 GI:16128206	16128206 GI:16128206	ASAP:ABE-0000740|UniProtKB/Swiss-Prot:P0AD59|EcoGene:EG13547|GeneID:946530|						GCF_000005845.2_ASM584v2_genomic_29-OCT-2014 _iRT	>gi|16128206 GI:16128206|ASAP:ABE-0000740|UniProtKB/Swiss-Prot:P0AD59|EcoGene:EG13547|GeneID:946530|
3	_AAFNQMVQGHK_	_AAFNQMVQGHK_	AAFNQMVQGHK	-4.34261	16128206 GI:16128206	TRUE	_AAFNQMVQGHK_	410.873	H2O	4	y	1	451.241	36.1546	TRUE	gi	16128206 GI:16128206	16128206 GI:16128206	ASAP:ABE-0000740|UniProtKB/Swiss-Prot:P0AD59|EcoGene:EG13547|GeneID:946530|						GCF_000005845.2_ASM584v2_genomic_29-OCT-2014 _iRT	>gi|16128206 GI:16128206|ASAP:ABE-0000740|UniProtKB/Swiss-Prot:P0AD59|EcoGene:EG13547|GeneID:946530|
3	_AAFNQMVQGHK_	_AAFNQMVQGHK_	AAFNQMVQGHK	-4.34261	16128206 GI:16128206	TRUE	_AAFNQMVQGHK_	410.873	NH3	4	y	1	452.225	74.5496	FALSE	gi	16128206 GI:16128206	16128206 GI:16128206	ASAP:ABE-0000740|UniProtKB/Swiss-Prot:P0AD59|EcoGene:EG13547|GeneID:946530|						GCF_000005845.2_ASM584v2_genomic_29-OCT-2014 _iRT	>gi|16128206 GI:16128206|ASAP:ABE-0000740|UniProtKB/Swiss-Prot:P0AD59|EcoGene:EG13547|GeneID:946530|
3	_AAFNQMVQGHK_	_AAFNQMVQGHK_	AAFNQMVQGHK	-4.34261	16128206 GI:16128206	TRUE	_AAFNQMVQGHK_	410.873	NH3	8	y	2	462.721	10.1536	TRUE	gi	16128206 GI:16128206	16128206 GI:16128206	ASAP:ABE-0000740|UniProtKB/Swiss-Prot:P0AD59|EcoGene:EG13547|GeneID:946530|						GCF_000005845.2_ASM584v2_genomic_29-OCT-2014 _iRT	>gi|16128206 GI:16128206|ASAP:ABE-0000740|UniProtKB/Swiss-Prot:P0AD59|EcoGene:EG13547|GeneID:946530|
3	_AAFNQMVQGHK_	_AAFNQMVQGHK_	AAFNQMVQGHK	-4.34261	16128206 GI:16128206	TRUE	_AAFNQMVQGHK_	410.873	noloss	4	y	1	469.252	67.6474	FALSE	gi	16128206 GI:16128206	16128206 GI:16128206	ASAP:ABE-0000740|UniProtKB/Swiss-Prot:P0AD59|EcoGene:EG13547|GeneID:946530|						GCF_000005845.2_ASM584v2_genomic_29-OCT-2014 _iRT	>gi|16128206 GI:16128206|ASAP:ABE-0000740|UniProtKB/Swiss-Prot:P0AD59|EcoGene:EG13547|GeneID:946530|
3	_AAFNQMVQGHK_	_AAFNQMVQGHK_	AAFNQMVQGHK	-4.34261	16128206 GI:16128206	TRUE	_AAFNQMVQGHK_	410.873	noloss	8	y	2	471.235	15.1267	TRUE	gi	16128206 GI:16128206	16128206 GI:16128206	ASAP:ABE-0000740|UniProtKB/Swiss-Prot:P0AD59|EcoGene:EG13547|GeneID:946530|						GCF_000005845.2_ASM584v2_genomic_29-OCT-2014 _iRT	>gi|16128206 GI:16128206|ASAP:ABE-0000740|UniProtKB/Swiss-Prot:P0AD59|EcoGene:EG13547|GeneID:946530|
3	_AAFNQMVQGHK_	_AAFNQMVQGHK_	AAFNQMVQGHK	-4.34261	16128206 GI:16128206	TRUE	_AAFNQMVQGHK_	410.873	noloss	9	b	2	474.224	5.11695	TRUE	gi	16128206 GI:16128206	16128206 GI:16128206	ASAP:ABE-0000740|UniProtKB/Swiss-Prot:P0AD59|EcoGene:EG13547|GeneID:946530|						GCF_000005845.2_ASM584v2_genomic_29-OCT-2014 _iRT	>gi|16128206 GI:16128206|ASAP:ABE-0000740|UniProtKB/Swiss-Prot:P0AD59|EcoGene:EG13547|GeneID:946530|
3	_AAFNQMVQGHK_	_AAFNQMVQGHK_	AAFNQMVQGHK	-4.34261	16128206 GI:16128206	TRUE	_AAFNQMVQGHK_	410.873	noloss	5	b	1	532.251	27.3162	TRUE	gi	16128206 GI:16128206	16128206 GI:16128206	ASAP:ABE-0000740|UniProtKB/Swiss-Prot:P0AD59|EcoGene:EG13547|GeneID:946530|						GCF_000005845.2_ASM584v2_genomic_29-OCT-2014 _iRT	>gi|16128206 GI:16128206|ASAP:ABE-0000740|UniProtKB/Swiss-Prot:P0AD59|EcoGene:EG13547|GeneID:946530|
3	_AAFNQMVQGHK_	_AAFNQMVQGHK_	AAFNQMVQGHK	-4.34261	16128206 GI:16128206	TRUE	_AAFNQMVQGHK_	410.873	noloss	9	y	2	544.769	6.00814	TRUE	gi	16128206 GI:16128206	16128206 GI:16128206	ASAP:ABE-0000740|UniProtKB/Swiss-Prot:P0AD59|EcoGene:EG13547|GeneID:946530|						GCF_000005845.2_ASM584v2_genomic_29-OCT-2014 _iRT	>gi|16128206 GI:16128206|ASAP:ABE-0000740|UniProtKB/Swiss-Prot:P0AD59|EcoGene:EG13547|GeneID:946530|
3	_AAFNQMVQGHK_	_AAFNQMVQGHK_	AAFNQMVQGHK	-4.34261	16128206 GI:16128206	TRUE	_AAFNQMVQGHK_	410.873	H2O	5	y	1	550.31	12.9265	TRUE	gi	16128206 GI:16128206	16128206 GI:16128206	ASAP:ABE-0000740|UniProtKB/Swiss-Prot:P0AD59|EcoGene:EG13547|GeneID:946530|						GCF_000005845.2_ASM584v2_genomic_29-OCT-2014 _iRT	>gi|16128206 GI:16128206|ASAP:ABE-0000740|UniProtKB/Swiss-Prot:P0AD59|EcoGene:EG13547|GeneID:946530|
3	_AAFNQMVQGHK_	_AAFNQMVQGHK_	AAFNQMVQGHK	-4.34261	16128206 GI:16128206	TRUE	_AAFNQMVQGHK_	410.873	NH3	5	y	1	551.294	86.2452	FALSE	gi	16128206 GI:16128206	16128206 GI:16128206	ASAP:ABE-0000740|UniProtKB/Swiss-Prot:P0AD59|EcoGene:EG13547|GeneID:946530|						GCF_000005845.2_ASM584v2_genomic_29-OCT-2014 _iRT	>gi|16128206 GI:16128206|ASAP:ABE-0000740|UniProtKB/Swiss-Prot:P0AD59|EcoGene:EG13547|GeneID:946530|
3	_AAFNQMVQGHK_	_AAFNQMVQGHK_	AAFNQMVQGHK	-4.34261	16128206 GI:16128206	TRUE	_AAFNQMVQGHK_	410.873	noloss	5	y	1	568.32	99.2289	FALSE	gi	16128206 GI:16128206	16128206 GI:16128206	ASAP:ABE-0000740|UniProtKB/Swiss-Prot:P0AD59|EcoGene:EG13547|GeneID:946530|						GCF_000005845.2_ASM584v2_genomic_29-OCT-2014 _iRT	>gi|16128206 GI:16128206|ASAP:ABE-0000740|UniProtKB/Swiss-Prot:P0AD59|EcoGene:EG13547|GeneID:946530|
3	_AAFNQMVQGHK_	_AAFNQMVQGHK_	AAFNQMVQGHK	-4.34261	16128206 GI:16128206	TRUE	_AAFNQMVQGHK_	410.873	H2O	10	y	2	571.282	7.14307	TRUE	gi	16128206 GI:16128206	16128206 GI:16128206	ASAP:ABE-0000740|UniProtKB/Swiss-Prot:P0AD59|EcoGene:EG13547|GeneID:946530|						GCF_000005845.2_ASM584v2_genomic_29-OCT-2014 _iRT	>gi|16128206 GI:16128206|ASAP:ABE-0000740|UniProtKB/Swiss-Prot:P0AD59|EcoGene:EG13547|GeneID:946530|
3	_AAFNQMVQGHK_	_AAFNQMVQGHK_	AAFNQMVQGHK	-4.34261	16128206 GI:16128206	TRUE	_AAFNQMVQGHK_	410.873	noloss	10	y	2	580.287	9.20504	TRUE	gi	16128206 GI:16128206	16128206 GI:16128206	ASAP:ABE-0000740|UniProtKB/Swiss-Prot:P0AD59|EcoGene:EG13547|GeneID:946530|						GCF_000005845.2_ASM584v2_genomic_29-OCT-2014 _iRT	>gi|16128206 GI:16128206|ASAP:ABE-0000740|UniProtKB/Swiss-Prot:P0AD59|EcoGene:EG13547|GeneID:946530|
3	_AAFNQMVQGHK_	_AAFNQMVQGHK_	AAFNQMVQGHK	-4.34261	16128206 GI:16128206	TRUE	_AAFNQMVQGHK_	410.873	noloss	6	b	1	663.292	7.52931	TRUE	gi	16128206 GI:16128206	16128206 GI:16128206	ASAP:ABE-0000740|UniProtKB/Swiss-Prot:P0AD59|EcoGene:EG13547|GeneID:946530|						GCF_000005845.2_ASM584v2_genomic_29-OCT-2014 _iRT	>gi|16128206 GI:16128206|ASAP:ABE-0000740|UniProtKB/Swiss-Prot:P0AD59|EcoGene:EG13547|GeneID:946530|
3	_AAFNQMVQGHK_	_AAFNQMVQGHK_	AAFNQMVQGHK	-4.34261	16128206 GI:16128206	TRUE	_AAFNQMVQGHK_	410.873	H2O	6	y	1	681.35	11.3711	TRUE	gi	16128206 GI:16128206	16128206 GI:16128206	ASAP:ABE-0000740|UniProtKB/Swiss-Prot:P0AD59|EcoGene:EG13547|GeneID:946530|						GCF_000005845.2_ASM584v2_genomic_29-OCT-2014 _iRT	>gi|16128206 GI:16128206|ASAP:ABE-0000740|UniProtKB/Swiss-Prot:P0AD59|EcoGene:EG13547|GeneID:946530|
3	_AAFNQMVQGHK_	_AAFNQMVQGHK_	AAFNQMVQGHK	-4.34261	16128206 GI:16128206	TRUE	_AAFNQMVQGHK_	410.873	NH3	6	y	1	682.334	11.1419	TRUE	gi	16128206 GI:16128206	16128206 GI:16128206	ASAP:ABE-0000740|UniProtKB/Swiss-Prot:P0AD59|EcoGene:EG13547|GeneID:946530|						GCF_000005845.2_ASM584v2_genomic_29-OCT-2014 _iRT	>gi|16128206 GI:16128206|ASAP:ABE-0000740|UniProtKB/Swiss-Prot:P0AD59|EcoGene:EG13547|GeneID:946530|
3	_AAFNQMVQGHK_	_AAFNQMVQGHK_	AAFNQMVQGHK	-4.34261	16128206 GI:16128206	TRUE	_AAFNQMVQGHK_	410.873	noloss	6	y	1	699.361	100	FALSE	gi	16128206 GI:16128206	16128206 GI:16128206	ASAP:ABE-0000740|UniProtKB/Swiss-Prot:P0AD59|EcoGene:EG13547|GeneID:946530|						GCF_000005845.2_ASM584v2_genomic_29-OCT-2014 _iRT	>gi|16128206 GI:16128206|ASAP:ABE-0000740|UniProtKB/Swiss-Prot:P0AD59|EcoGene:EG13547|GeneID:946530|
3	_AAFNQMVQGHK_	_AAFNQMVQGHK_	AAFNQMVQGHK	-4.34261	16128206 GI:16128206	TRUE	_AAFNQMVQGHK_	410.873	H2O	7	y	1	809.409	13.8397	TRUE	gi	16128206 GI:16128206	16128206 GI:16128206	ASAP:ABE-0000740|UniProtKB/Swiss-Prot:P0AD59|EcoGene:EG13547|GeneID:946530|						GCF_000005845.2_ASM584v2_genomic_29-OCT-2014 _iRT	>gi|16128206 GI:16128206|ASAP:ABE-0000740|UniProtKB/Swiss-Prot:P0AD59|EcoGene:EG13547|GeneID:946530|
3	_AAFNQMVQGHK_	_AAFNQMVQGHK_	AAFNQMVQGHK	-4.34261	16128206 GI:16128206	TRUE	_AAFNQMVQGHK_	410.873	NH3	7	y	1	810.393	41.5747	TRUE	gi	16128206 GI:16128206	16128206 GI:16128206	ASAP:ABE-0000740|UniProtKB/Swiss-Prot:P0AD59|EcoGene:EG13547|GeneID:946530|						GCF_000005845.2_ASM584v2_genomic_29-OCT-2014 _iRT	>gi|16128206 GI:16128206|ASAP:ABE-0000740|UniProtKB/Swiss-Prot:P0AD59|EcoGene:EG13547|GeneID:946530|
3	_AAFNQMVQGHK_	_AAFNQMVQGHK_	AAFNQMVQGHK	-4.34261	16128206 GI:16128206	TRUE	_AAFNQMVQGHK_	410.873	noloss	7	y	1	827.419	31.1815	TRUE	gi	16128206 GI:16128206	16128206 GI:16128206	ASAP:ABE-0000740|UniProtKB/Swiss-Prot:P0AD59|EcoGene:EG13547|GeneID:946530|						GCF_000005845.2_ASM584v2_genomic_29-OCT-2014 _iRT	>gi|16128206 GI:16128206|ASAP:ABE-0000740|UniProtKB/Swiss-Prot:P0AD59|EcoGene:EG13547|GeneID:946530|
3	_AAFNQMVQGHK_	_AAFNQMVQGHK_	AAFNQMVQGHK	-4.34261	16128206 GI:16128206	TRUE	_AAFNQMVQGHK_	410.873	NH3	8	y	1	924.436	12.4483	TRUE	gi	16128206 GI:16128206	16128206 GI:16128206	ASAP:ABE-0000740|UniProtKB/Swiss-Prot:P0AD59|EcoGene:EG13547|GeneID:946530|						GCF_000005845.2_ASM584v2_genomic_29-OCT-2014 _iRT	>gi|16128206 GI:16128206|ASAP:ABE-0000740|UniProtKB/Swiss-Prot:P0AD59|EcoGene:EG13547|GeneID:946530|
3	_AAFNQMVQGHK_	_AAFNQMVQGHK_	AAFNQMVQGHK	-4.34261	16128206 GI:16128206	TRUE	_AAFNQMVQGHK_	410.873	noloss	8	y	1	941.462	32.5092	TRUE	gi	16128206 GI:16128206	16128206 GI:16128206	ASAP:ABE-0000740|UniProtKB/Swiss-Prot:P0AD59|EcoGene:EG13547|GeneID:946530|						GCF_000005845.2_ASM584v2_genomic_29-OCT-2014 _iRT	>gi|16128206 GI:16128206|ASAP:ABE-0000740|UniProtKB/Swiss-Prot:P0AD59|EcoGene:EG13547|GeneID:946530|
3	_AAFNQMVQGHK_	_AAFNQMVQGHK_	AAFNQMVQGHK	-4.34261	16128206 GI:16128206	TRUE	_AAFNQMVQGHK_	410.873	H2O	4	b	1	386.182	9.44218	TRUE	gi	16128206 GI:16128206	16128206 GI:16128206	ASAP:ABE-0000740|UniProtKB/Swiss-Prot:P0AD59|EcoGene:EG13547|GeneID:946530|						GCF_000005845.2_ASM584v2_genomic_29-OCT-2014 _iRT	>gi|16128206 GI:16128206|ASAP:ABE-0000740|UniProtKB/Swiss-Prot:P0AD59|EcoGene:EG13547|GeneID:946530|
3	_AAFNQMVQGHK_	_AAFNQMVQGHK_	AAFNQMVQGHK	-4.34261	16128206 GI:16128206	TRUE	_AAFNQMVQGHK_	410.873	H2O	7	b	1	744.35	5.34743	TRUE	gi	16128206 GI:16128206	16128206 GI:16128206	ASAP:ABE-0000740|UniProtKB/Swiss-Prot:P0AD59|EcoGene:EG13547|GeneID:946530|						GCF_000005845.2_ASM584v2_genomic_29-OCT-2014 _iRT	>gi|16128206 GI:16128206|ASAP:ABE-0000740|UniProtKB/Swiss-Prot:P0AD59|EcoGene:EG13547|GeneID:946530|
3	_YNEDVGELHR_	_YNEDVGELHR_	YNEDVGELHR	-1.48547	16129389 GI:16129389	TRUE	_YNEDVGELHR_	411.195	noloss	5	y	2	306.167	15.3295	FALSE	gi	16129389 GI:16129389	16129389 GI:16129389	ASAP:ABE-0004772|UniProtKB/Swiss-Prot:P25397|EcoGene:EG11884|GeneID:945979|						GCF_000005845.2_ASM584v2_genomic_29-OCT-2014 _iRT	>gi|16129389 GI:16129389|ASAP:ABE-0004772|UniProtKB/Swiss-Prot:P25397|EcoGene:EG11884|GeneID:945979|
3	_YNEDVGELHR_	_YNEDVGELHR_	YNEDVGELHR	-1.48547	16129389 GI:16129389	TRUE	_YNEDVGELHR_	411.195	noloss	6	y	2	355.701	8.77699	TRUE	gi	16129389 GI:16129389	16129389 GI:16129389	ASAP:ABE-0004772|UniProtKB/Swiss-Prot:P25397|EcoGene:EG11884|GeneID:945979|						GCF_000005845.2_ASM584v2_genomic_29-OCT-2014 _iRT	>gi|16129389 GI:16129389|ASAP:ABE-0004772|UniProtKB/Swiss-Prot:P25397|EcoGene:EG11884|GeneID:945979|
3	_YNEDVGELHR_	_YNEDVGELHR_	YNEDVGELHR	-1.48547	16129389 GI:16129389	TRUE	_YNEDVGELHR_	411.195	noloss	3	y	1	425.262	39.9007	FALSE	gi	16129389 GI:16129389	16129389 GI:16129389	ASAP:ABE-0004772|UniProtKB/Swiss-Prot:P25397|EcoGene:EG11884|GeneID:945979|						GCF_000005845.2_ASM584v2_genomic_29-OCT-2014 _iRT	>gi|16129389 GI:16129389|ASAP:ABE-0004772|UniProtKB/Swiss-Prot:P25397|EcoGene:EG11884|GeneID:945979|
3	_YNEDVGELHR_	_YNEDVGELHR_	YNEDVGELHR	-1.48547	16129389 GI:16129389	TRUE	_YNEDVGELHR_	411.195	NH3	9	y	2	526.244	7.75181	TRUE	gi	16129389 GI:16129389	16129389 GI:16129389	ASAP:ABE-0004772|UniProtKB/Swiss-Prot:P25397|EcoGene:EG11884|GeneID:945979|						GCF_000005845.2_ASM584v2_genomic_29-OCT-2014 _iRT	>gi|16129389 GI:16129389|ASAP:ABE-0004772|UniProtKB/Swiss-Prot:P25397|EcoGene:EG11884|GeneID:945979|
3	_YNEDVGELHR_	_YNEDVGELHR_	YNEDVGELHR	-1.48547	16129389 GI:16129389	TRUE	_YNEDVGELHR_	411.195	noloss	4	y	1	554.305	15.6984	FALSE	gi	16129389 GI:16129389	16129389 GI:16129389	ASAP:ABE-0004772|UniProtKB/Swiss-Prot:P25397|EcoGene:EG11884|GeneID:945979|						GCF_000005845.2_ASM584v2_genomic_29-OCT-2014 _iRT	>gi|16129389 GI:16129389|ASAP:ABE-0004772|UniProtKB/Swiss-Prot:P25397|EcoGene:EG11884|GeneID:945979|
3	_YNEDVGELHR_	_YNEDVGELHR_	YNEDVGELHR	-1.48547	16129389 GI:16129389	TRUE	_YNEDVGELHR_	411.195	H2O	5	y	1	593.315	5.74254	TRUE	gi	16129389 GI:16129389	16129389 GI:16129389	ASAP:ABE-0004772|UniProtKB/Swiss-Prot:P25397|EcoGene:EG11884|GeneID:945979|						GCF_000005845.2_ASM584v2_genomic_29-OCT-2014 _iRT	>gi|16129389 GI:16129389|ASAP:ABE-0004772|UniProtKB/Swiss-Prot:P25397|EcoGene:EG11884|GeneID:945979|
3	_YNEDVGELHR_	_YNEDVGELHR_	YNEDVGELHR	-1.48547	16129389 GI:16129389	TRUE	_YNEDVGELHR_	411.195	noloss	5	y	1	611.326	100	FALSE	gi	16129389 GI:16129389	16129389 GI:16129389	ASAP:ABE-0004772|UniProtKB/Swiss-Prot:P25397|EcoGene:EG11884|GeneID:945979|						GCF_000005845.2_ASM584v2_genomic_29-OCT-2014 _iRT	>gi|16129389 GI:16129389|ASAP:ABE-0004772|UniProtKB/Swiss-Prot:P25397|EcoGene:EG11884|GeneID:945979|
3	_YNEDVGELHR_	_YNEDVGELHR_	YNEDVGELHR	-1.48547	16129389 GI:16129389	TRUE	_YNEDVGELHR_	411.195	noloss	6	y	1	710.394	24.999	FALSE	gi	16129389 GI:16129389	16129389 GI:16129389	ASAP:ABE-0004772|UniProtKB/Swiss-Prot:P25397|EcoGene:EG11884|GeneID:945979|						GCF_000005845.2_ASM584v2_genomic_29-OCT-2014 _iRT	>gi|16129389 GI:16129389|ASAP:ABE-0004772|UniProtKB/Swiss-Prot:P25397|EcoGene:EG11884|GeneID:945979|
3	_YNEDVGELHR_	_YNEDVGELHR_	YNEDVGELHR	-1.48547	16129389 GI:16129389	TRUE	_YNEDVGELHR_	411.195	noloss	7	y	1	825.421	23.6175	FALSE	gi	16129389 GI:16129389	16129389 GI:16129389	ASAP:ABE-0004772|UniProtKB/Swiss-Prot:P25397|EcoGene:EG11884|GeneID:945979|						GCF_000005845.2_ASM584v2_genomic_29-OCT-2014 _iRT	>gi|16129389 GI:16129389|ASAP:ABE-0004772|UniProtKB/Swiss-Prot:P25397|EcoGene:EG11884|GeneID:945979|
2	_TMVDDLK_	_TMVDDLK_	TMVDDLK	1.60239	16130604 GI:16130604	TRUE	_TMVDDLK_	411.207	noloss	3	y	1	375.224	29.4477	FALSE	gi	16130604 GI:16130604	16130604 GI:16130604	ASAP:ABE-0008869|UniProtKB/Swiss-Prot:P00957|EcoGene:EG10034|GeneID:947175|						GCF_000005845.2_ASM584v2_genomic_29-OCT-2014 _iRT	>gi|16130604 GI:16130604|ASAP:ABE-0008869|UniProtKB/Swiss-Prot:P00957|EcoGene:EG10034|GeneID:947175|
2	_TMVDDLK_	_TMVDDLK_	TMVDDLK	1.60239	16130604 GI:16130604	TRUE	_TMVDDLK_	411.207	noloss	4	y	1	490.251	34.8913	FALSE	gi	16130604 GI:16130604	16130604 GI:16130604	ASAP:ABE-0008869|UniProtKB/Swiss-Prot:P00957|EcoGene:EG10034|GeneID:947175|						GCF_000005845.2_ASM584v2_genomic_29-OCT-2014 _iRT	>gi|16130604 GI:16130604|ASAP:ABE-0008869|UniProtKB/Swiss-Prot:P00957|EcoGene:EG10034|GeneID:947175|
2	_TMVDDLK_	_TMVDDLK_	TMVDDLK	1.60239	16130604 GI:16130604	TRUE	_TMVDDLK_	411.207	noloss	5	y	1	589.319	100	FALSE	gi	16130604 GI:16130604	16130604 GI:16130604	ASAP:ABE-0008869|UniProtKB/Swiss-Prot:P00957|EcoGene:EG10034|GeneID:947175|						GCF_000005845.2_ASM584v2_genomic_29-OCT-2014 _iRT	>gi|16130604 GI:16130604|ASAP:ABE-0008869|UniProtKB/Swiss-Prot:P00957|EcoGene:EG10034|GeneID:947175|
2	_TMVDDLK_	_TMVDDLK_	TMVDDLK	1.60239	16130604 GI:16130604	TRUE	_TMVDDLK_	411.207	noloss	6	y	1	720.36	20.7347	FALSE	gi	16130604 GI:16130604	16130604 GI:16130604	ASAP:ABE-0008869|UniProtKB/Swiss-Prot:P00957|EcoGene:EG10034|GeneID:947175|						GCF_000005845.2_ASM584v2_genomic_29-OCT-2014 _iRT	>gi|16130604 GI:16130604|ASAP:ABE-0008869|UniProtKB/Swiss-Prot:P00957|EcoGene:EG10034|GeneID:947175|
2	_LLLPIPR_	_LLLPIPR_	LLLPIPR	50.4228	16131654 GI:16131654	TRUE	_LLLPIPR_	411.284	noloss	3	y	1	385.256	6.10008	FALSE	gi	16131654 GI:16131654	16131654 GI:16131654	ASAP:ABE-0012417|UniProtKB/Swiss-Prot:P0ACB7|EcoGene:EG10434|GeneID:948311|						GCF_000005845.2_ASM584v2_genomic_29-OCT-2014 _iRT	>gi|16131654 GI:16131654|ASAP:ABE-0012417|UniProtKB/Swiss-Prot:P0ACB7|EcoGene:EG10434|GeneID:948311|
2	_LLLPIPR_	_LLLPIPR_	LLLPIPR	50.4228	16131654 GI:16131654	TRUE	_LLLPIPR_	411.284	noloss	4	y	1	482.309	100	FALSE	gi	16131654 GI:16131654	16131654 GI:16131654	ASAP:ABE-0012417|UniProtKB/Swiss-Prot:P0ACB7|EcoGene:EG10434|GeneID:948311|						GCF_000005845.2_ASM584v2_genomic_29-OCT-2014 _iRT	>gi|16131654 GI:16131654|ASAP:ABE-0012417|UniProtKB/Swiss-Prot:P0ACB7|EcoGene:EG10434|GeneID:948311|
2	_LLLPIPR_	_LLLPIPR_	LLLPIPR	50.4228	16131654 GI:16131654	TRUE	_LLLPIPR_	411.284	noloss	5	y	1	595.393	39.6902	FALSE	gi	16131654 GI:16131654	16131654 GI:16131654	ASAP:ABE-0012417|UniProtKB/Swiss-Prot:P0ACB7|EcoGene:EG10434|GeneID:948311|						GCF_000005845.2_ASM584v2_genomic_29-OCT-2014 _iRT	>gi|16131654 GI:16131654|ASAP:ABE-0012417|UniProtKB/Swiss-Prot:P0ACB7|EcoGene:EG10434|GeneID:948311|
2	_LLLPIPR_	_LLLPIPR_	LLLPIPR	50.4228	16131654 GI:16131654	TRUE	_LLLPIPR_	411.284	noloss	6	y	1	708.477	7.15479	FALSE	gi	16131654 GI:16131654	16131654 GI:16131654	ASAP:ABE-0012417|UniProtKB/Swiss-Prot:P0ACB7|EcoGene:EG10434|GeneID:948311|						GCF_000005845.2_ASM584v2_genomic_29-OCT-2014 _iRT	>gi|16131654 GI:16131654|ASAP:ABE-0012417|UniProtKB/Swiss-Prot:P0ACB7|EcoGene:EG10434|GeneID:948311|
3	_NDC[+57]VQC[+57]HATK_	_NDC[Carbamidomethyl]VQC[Carbamidomethyl]HATK_	NDCVQCHATK	-54.198	16130587 GI:16130587	TRUE	_NDC[Carbamidomethyl]VQC[Carbamidomethyl]HATK_	411.51	H2O	3	y	1	301.187	5.06853	TRUE	gi	16130587 GI:16130587	16130587 GI:16130587	ASAP:ABE-0008802|UniProtKB/Swiss-Prot:P0AC65|EcoGene:EG13286|GeneID:947161|						GCF_000005845.2_ASM584v2_genomic_29-OCT-2014 _iRT	>gi|16130587 GI:16130587|ASAP:ABE-0008802|UniProtKB/Swiss-Prot:P0AC65|EcoGene:EG13286|GeneID:947161|
3	_NDC[+57]VQC[+57]HATK_	_NDC[Carbamidomethyl]VQC[Carbamidomethyl]HATK_	NDCVQCHATK	-54.198	16130587 GI:16130587	TRUE	_NDC[Carbamidomethyl]VQC[Carbamidomethyl]HATK_	411.51	noloss	5	y	2	308.647	18.518	TRUE	gi	16130587 GI:16130587	16130587 GI:16130587	ASAP:ABE-0008802|UniProtKB/Swiss-Prot:P0AC65|EcoGene:EG13286|GeneID:947161|						GCF_000005845.2_ASM584v2_genomic_29-OCT-2014 _iRT	>gi|16130587 GI:16130587|ASAP:ABE-0008802|UniProtKB/Swiss-Prot:P0AC65|EcoGene:EG13286|GeneID:947161|
3	_NDC[+57]VQC[+57]HATK_	_NDC[Carbamidomethyl]VQC[Carbamidomethyl]HATK_	NDCVQCHATK	-54.198	16130587 GI:16130587	TRUE	_NDC[Carbamidomethyl]VQC[Carbamidomethyl]HATK_	411.51	noloss	3	y	1	319.198	28.6012	TRUE	gi	16130587 GI:16130587	16130587 GI:16130587	ASAP:ABE-0008802|UniProtKB/Swiss-Prot:P0AC65|EcoGene:EG13286|GeneID:947161|						GCF_000005845.2_ASM584v2_genomic_29-OCT-2014 _iRT	>gi|16130587 GI:16130587|ASAP:ABE-0008802|UniProtKB/Swiss-Prot:P0AC65|EcoGene:EG13286|GeneID:947161|
3	_NDC[+57]VQC[+57]HATK_	_NDC[Carbamidomethyl]VQC[Carbamidomethyl]HATK_	NDCVQCHATK	-54.198	16130587 GI:16130587	TRUE	_NDC[Carbamidomethyl]VQC[Carbamidomethyl]HATK_	411.51	NH3	8	y	3	329.478	8.21946	TRUE	gi	16130587 GI:16130587	16130587 GI:16130587	ASAP:ABE-0008802|UniProtKB/Swiss-Prot:P0AC65|EcoGene:EG13286|GeneID:947161|						GCF_000005845.2_ASM584v2_genomic_29-OCT-2014 _iRT	>gi|16130587 GI:16130587|ASAP:ABE-0008802|UniProtKB/Swiss-Prot:P0AC65|EcoGene:EG13286|GeneID:947161|
3	_NDC[+57]VQC[+57]HATK_	_NDC[Carbamidomethyl]VQC[Carbamidomethyl]HATK_	NDCVQCHATK	-54.198	16130587 GI:16130587	TRUE	_NDC[Carbamidomethyl]VQC[Carbamidomethyl]HATK_	411.51	noloss	8	y	3	335.153	87.9835	FALSE	gi	16130587 GI:16130587	16130587 GI:16130587	ASAP:ABE-0008802|UniProtKB/Swiss-Prot:P0AC65|EcoGene:EG13286|GeneID:947161|						GCF_000005845.2_ASM584v2_genomic_29-OCT-2014 _iRT	>gi|16130587 GI:16130587|ASAP:ABE-0008802|UniProtKB/Swiss-Prot:P0AC65|EcoGene:EG13286|GeneID:947161|
3	_NDC[+57]VQC[+57]HATK_	_NDC[Carbamidomethyl]VQC[Carbamidomethyl]HATK_	NDCVQCHATK	-54.198	16130587 GI:16130587	TRUE	_NDC[Carbamidomethyl]VQC[Carbamidomethyl]HATK_	411.51	NH3	9	b	3	357.132	5.86081	TRUE	gi	16130587 GI:16130587	16130587 GI:16130587	ASAP:ABE-0008802|UniProtKB/Swiss-Prot:P0AC65|EcoGene:EG13286|GeneID:947161|						GCF_000005845.2_ASM584v2_genomic_29-OCT-2014 _iRT	>gi|16130587 GI:16130587|ASAP:ABE-0008802|UniProtKB/Swiss-Prot:P0AC65|EcoGene:EG13286|GeneID:947161|
3	_NDC[+57]VQC[+57]HATK_	_NDC[Carbamidomethyl]VQC[Carbamidomethyl]HATK_	NDCVQCHATK	-54.198	16130587 GI:16130587	TRUE	_NDC[Carbamidomethyl]VQC[Carbamidomethyl]HATK_	411.51	H2O	6	y	2	363.671	36.2678	FALSE	gi	16130587 GI:16130587	16130587 GI:16130587	ASAP:ABE-0008802|UniProtKB/Swiss-Prot:P0AC65|EcoGene:EG13286|GeneID:947161|						GCF_000005845.2_ASM584v2_genomic_29-OCT-2014 _iRT	>gi|16130587 GI:16130587|ASAP:ABE-0008802|UniProtKB/Swiss-Prot:P0AC65|EcoGene:EG13286|GeneID:947161|
3	_NDC[+57]VQC[+57]HATK_	_NDC[Carbamidomethyl]VQC[Carbamidomethyl]HATK_	NDCVQCHATK	-54.198	16130587 GI:16130587	TRUE	_NDC[Carbamidomethyl]VQC[Carbamidomethyl]HATK_	411.51	NH3	6	y	2	364.163	100	FALSE	gi	16130587 GI:16130587	16130587 GI:16130587	ASAP:ABE-0008802|UniProtKB/Swiss-Prot:P0AC65|EcoGene:EG13286|GeneID:947161|						GCF_000005845.2_ASM584v2_genomic_29-OCT-2014 _iRT	>gi|16130587 GI:16130587|ASAP:ABE-0008802|UniProtKB/Swiss-Prot:P0AC65|EcoGene:EG13286|GeneID:947161|
3	_NDC[+57]VQC[+57]HATK_	_NDC[Carbamidomethyl]VQC[Carbamidomethyl]HATK_	NDCVQCHATK	-54.198	16130587 GI:16130587	TRUE	_NDC[Carbamidomethyl]VQC[Carbamidomethyl]HATK_	411.51	noloss	6	y	2	372.677	21.2584	TRUE	gi	16130587 GI:16130587	16130587 GI:16130587	ASAP:ABE-0008802|UniProtKB/Swiss-Prot:P0AC65|EcoGene:EG13286|GeneID:947161|						GCF_000005845.2_ASM584v2_genomic_29-OCT-2014 _iRT	>gi|16130587 GI:16130587|ASAP:ABE-0008802|UniProtKB/Swiss-Prot:P0AC65|EcoGene:EG13286|GeneID:947161|
3	_NDC[+57]VQC[+57]HATK_	_NDC[Carbamidomethyl]VQC[Carbamidomethyl]HATK_	NDCVQCHATK	-54.198	16130587 GI:16130587	TRUE	_NDC[Carbamidomethyl]VQC[Carbamidomethyl]HATK_	411.51	noloss	7	y	2	422.211	28.6416	TRUE	gi	16130587 GI:16130587	16130587 GI:16130587	ASAP:ABE-0008802|UniProtKB/Swiss-Prot:P0AC65|EcoGene:EG13286|GeneID:947161|						GCF_000005845.2_ASM584v2_genomic_29-OCT-2014 _iRT	>gi|16130587 GI:16130587|ASAP:ABE-0008802|UniProtKB/Swiss-Prot:P0AC65|EcoGene:EG13286|GeneID:947161|
3	_NDC[+57]VQC[+57]HATK_	_NDC[Carbamidomethyl]VQC[Carbamidomethyl]HATK_	NDCVQCHATK	-54.198	16130587 GI:16130587	TRUE	_NDC[Carbamidomethyl]VQC[Carbamidomethyl]HATK_	411.51	H2O	4	y	1	438.246	6.83003	TRUE	gi	16130587 GI:16130587	16130587 GI:16130587	ASAP:ABE-0008802|UniProtKB/Swiss-Prot:P0AC65|EcoGene:EG13286|GeneID:947161|						GCF_000005845.2_ASM584v2_genomic_29-OCT-2014 _iRT	>gi|16130587 GI:16130587|ASAP:ABE-0008802|UniProtKB/Swiss-Prot:P0AC65|EcoGene:EG13286|GeneID:947161|
3	_NDC[+57]VQC[+57]HATK_	_NDC[Carbamidomethyl]VQC[Carbamidomethyl]HATK_	NDCVQCHATK	-54.198	16130587 GI:16130587	TRUE	_NDC[Carbamidomethyl]VQC[Carbamidomethyl]HATK_	411.51	noloss	4	y	1	456.257	26.5613	TRUE	gi	16130587 GI:16130587	16130587 GI:16130587	ASAP:ABE-0008802|UniProtKB/Swiss-Prot:P0AC65|EcoGene:EG13286|GeneID:947161|						GCF_000005845.2_ASM584v2_genomic_29-OCT-2014 _iRT	>gi|16130587 GI:16130587|ASAP:ABE-0008802|UniProtKB/Swiss-Prot:P0AC65|EcoGene:EG13286|GeneID:947161|
3	_NDC[+57]VQC[+57]HATK_	_NDC[Carbamidomethyl]VQC[Carbamidomethyl]HATK_	NDCVQCHATK	-54.198	16130587 GI:16130587	TRUE	_NDC[Carbamidomethyl]VQC[Carbamidomethyl]HATK_	411.51	H2O	8	y	2	493.221	5.99731	TRUE	gi	16130587 GI:16130587	16130587 GI:16130587	ASAP:ABE-0008802|UniProtKB/Swiss-Prot:P0AC65|EcoGene:EG13286|GeneID:947161|						GCF_000005845.2_ASM584v2_genomic_29-OCT-2014 _iRT	>gi|16130587 GI:16130587|ASAP:ABE-0008802|UniProtKB/Swiss-Prot:P0AC65|EcoGene:EG13286|GeneID:947161|
3	_NDC[+57]VQC[+57]HATK_	_NDC[Carbamidomethyl]VQC[Carbamidomethyl]HATK_	NDCVQCHATK	-54.198	16130587 GI:16130587	TRUE	_NDC[Carbamidomethyl]VQC[Carbamidomethyl]HATK_	411.51	NH3	8	y	2	493.713	10.6915	TRUE	gi	16130587 GI:16130587	16130587 GI:16130587	ASAP:ABE-0008802|UniProtKB/Swiss-Prot:P0AC65|EcoGene:EG13286|GeneID:947161|						GCF_000005845.2_ASM584v2_genomic_29-OCT-2014 _iRT	>gi|16130587 GI:16130587|ASAP:ABE-0008802|UniProtKB/Swiss-Prot:P0AC65|EcoGene:EG13286|GeneID:947161|
3	_NDC[+57]VQC[+57]HATK_	_NDC[Carbamidomethyl]VQC[Carbamidomethyl]HATK_	NDCVQCHATK	-54.198	16130587 GI:16130587	TRUE	_NDC[Carbamidomethyl]VQC[Carbamidomethyl]HATK_	411.51	noloss	9	y	2	559.74	12.1124	TRUE	gi	16130587 GI:16130587	16130587 GI:16130587	ASAP:ABE-0008802|UniProtKB/Swiss-Prot:P0AC65|EcoGene:EG13286|GeneID:947161|						GCF_000005845.2_ASM584v2_genomic_29-OCT-2014 _iRT	>gi|16130587 GI:16130587|ASAP:ABE-0008802|UniProtKB/Swiss-Prot:P0AC65|EcoGene:EG13286|GeneID:947161|
3	_NDC[+57]VQC[+57]HATK_	_NDC[Carbamidomethyl]VQC[Carbamidomethyl]HATK_	NDCVQCHATK	-54.198	16130587 GI:16130587	TRUE	_NDC[Carbamidomethyl]VQC[Carbamidomethyl]HATK_	411.51	H2O	5	y	1	598.277	9.96093	TRUE	gi	16130587 GI:16130587	16130587 GI:16130587	ASAP:ABE-0008802|UniProtKB/Swiss-Prot:P0AC65|EcoGene:EG13286|GeneID:947161|						GCF_000005845.2_ASM584v2_genomic_29-OCT-2014 _iRT	>gi|16130587 GI:16130587|ASAP:ABE-0008802|UniProtKB/Swiss-Prot:P0AC65|EcoGene:EG13286|GeneID:947161|
3	_NDC[+57]VQC[+57]HATK_	_NDC[Carbamidomethyl]VQC[Carbamidomethyl]HATK_	NDCVQCHATK	-54.198	16130587 GI:16130587	TRUE	_NDC[Carbamidomethyl]VQC[Carbamidomethyl]HATK_	411.51	NH3	5	y	1	599.261	8.38166	TRUE	gi	16130587 GI:16130587	16130587 GI:16130587	ASAP:ABE-0008802|UniProtKB/Swiss-Prot:P0AC65|EcoGene:EG13286|GeneID:947161|						GCF_000005845.2_ASM584v2_genomic_29-OCT-2014 _iRT	>gi|16130587 GI:16130587|ASAP:ABE-0008802|UniProtKB/Swiss-Prot:P0AC65|EcoGene:EG13286|GeneID:947161|
3	_NDC[+57]VQC[+57]HATK_	_NDC[Carbamidomethyl]VQC[Carbamidomethyl]HATK_	NDCVQCHATK	-54.198	16130587 GI:16130587	TRUE	_NDC[Carbamidomethyl]VQC[Carbamidomethyl]HATK_	411.51	noloss	5	y	1	616.287	54.0525	FALSE	gi	16130587 GI:16130587	16130587 GI:16130587	ASAP:ABE-0008802|UniProtKB/Swiss-Prot:P0AC65|EcoGene:EG13286|GeneID:947161|						GCF_000005845.2_ASM584v2_genomic_29-OCT-2014 _iRT	>gi|16130587 GI:16130587|ASAP:ABE-0008802|UniProtKB/Swiss-Prot:P0AC65|EcoGene:EG13286|GeneID:947161|
3	_NDC[+57]VQC[+57]HATK_	_NDC[Carbamidomethyl]VQC[Carbamidomethyl]HATK_	NDCVQCHATK	-54.198	16130587 GI:16130587	TRUE	_NDC[Carbamidomethyl]VQC[Carbamidomethyl]HATK_	411.51	H2O	6	y	1	726.335	16.1276	TRUE	gi	16130587 GI:16130587	16130587 GI:16130587	ASAP:ABE-0008802|UniProtKB/Swiss-Prot:P0AC65|EcoGene:EG13286|GeneID:947161|						GCF_000005845.2_ASM584v2_genomic_29-OCT-2014 _iRT	>gi|16130587 GI:16130587|ASAP:ABE-0008802|UniProtKB/Swiss-Prot:P0AC65|EcoGene:EG13286|GeneID:947161|
3	_NDC[+57]VQC[+57]HATK_	_NDC[Carbamidomethyl]VQC[Carbamidomethyl]HATK_	NDCVQCHATK	-54.198	16130587 GI:16130587	TRUE	_NDC[Carbamidomethyl]VQC[Carbamidomethyl]HATK_	411.51	NH3	6	y	1	727.319	34.8199	FALSE	gi	16130587 GI:16130587	16130587 GI:16130587	ASAP:ABE-0008802|UniProtKB/Swiss-Prot:P0AC65|EcoGene:EG13286|GeneID:947161|						GCF_000005845.2_ASM584v2_genomic_29-OCT-2014 _iRT	>gi|16130587 GI:16130587|ASAP:ABE-0008802|UniProtKB/Swiss-Prot:P0AC65|EcoGene:EG13286|GeneID:947161|
3	_NDC[+57]VQC[+57]HATK_	_NDC[Carbamidomethyl]VQC[Carbamidomethyl]HATK_	NDCVQCHATK	-54.198	16130587 GI:16130587	TRUE	_NDC[Carbamidomethyl]VQC[Carbamidomethyl]HATK_	411.51	noloss	6	y	1	744.346	41.3959	FALSE	gi	16130587 GI:16130587	16130587 GI:16130587	ASAP:ABE-0008802|UniProtKB/Swiss-Prot:P0AC65|EcoGene:EG13286|GeneID:947161|						GCF_000005845.2_ASM584v2_genomic_29-OCT-2014 _iRT	>gi|16130587 GI:16130587|ASAP:ABE-0008802|UniProtKB/Swiss-Prot:P0AC65|EcoGene:EG13286|GeneID:947161|
3	_NDC[+57]VQC[+57]HATK_	_NDC[Carbamidomethyl]VQC[Carbamidomethyl]HATK_	NDCVQCHATK	-54.198	16130587 GI:16130587	TRUE	_NDC[Carbamidomethyl]VQC[Carbamidomethyl]HATK_	411.51	noloss	7	y	1	843.414	12.8855	TRUE	gi	16130587 GI:16130587	16130587 GI:16130587	ASAP:ABE-0008802|UniProtKB/Swiss-Prot:P0AC65|EcoGene:EG13286|GeneID:947161|						GCF_000005845.2_ASM584v2_genomic_29-OCT-2014 _iRT	>gi|16130587 GI:16130587|ASAP:ABE-0008802|UniProtKB/Swiss-Prot:P0AC65|EcoGene:EG13286|GeneID:947161|
3	_NDC[+57]VQC[+57]HATK_	_NDC[Carbamidomethyl]VQC[Carbamidomethyl]HATK_	NDCVQCHATK	-54.198	16130587 GI:16130587	TRUE	_NDC[Carbamidomethyl]VQC[Carbamidomethyl]HATK_	411.51	noloss	8	y	2	502.226	7.51518	TRUE	gi	16130587 GI:16130587	16130587 GI:16130587	ASAP:ABE-0008802|UniProtKB/Swiss-Prot:P0AC65|EcoGene:EG13286|GeneID:947161|						GCF_000005845.2_ASM584v2_genomic_29-OCT-2014 _iRT	>gi|16130587 GI:16130587|ASAP:ABE-0008802|UniProtKB/Swiss-Prot:P0AC65|EcoGene:EG13286|GeneID:947161|
3	_NDC[+57]VQC[+57]HATK_	_NDC[Carbamidomethyl]VQC[Carbamidomethyl]HATK_	NDCVQCHATK	-54.198	16130587 GI:16130587	TRUE	_NDC[Carbamidomethyl]VQC[Carbamidomethyl]HATK_	411.51	H2O	9	y	2	550.734	7.34429	TRUE	gi	16130587 GI:16130587	16130587 GI:16130587	ASAP:ABE-0008802|UniProtKB/Swiss-Prot:P0AC65|EcoGene:EG13286|GeneID:947161|						GCF_000005845.2_ASM584v2_genomic_29-OCT-2014 _iRT	>gi|16130587 GI:16130587|ASAP:ABE-0008802|UniProtKB/Swiss-Prot:P0AC65|EcoGene:EG13286|GeneID:947161|
2	_LYGNLDK_	_LYGNLDK_	LYGNLDK	-7.60381	16128567 GI:16128567	TRUE	_LYGNLDK_	411.721	noloss	3	y	1	375.224	27.2635	FALSE	gi	16128567 GI:16128567	16128567 GI:16128567	ASAP:ABE-0002014|UniProtKB/Swiss-Prot:P05825|EcoGene:EG10293|GeneID:945193|						GCF_000005845.2_ASM584v2_genomic_29-OCT-2014 _iRT	>gi|16128567 GI:16128567|ASAP:ABE-0002014|UniProtKB/Swiss-Prot:P05825|EcoGene:EG10293|GeneID:945193|
2	_LYGNLDK_	_LYGNLDK_	LYGNLDK	-7.60381	16128567 GI:16128567	TRUE	_LYGNLDK_	411.721	noloss	4	b	1	448.219	6.15665	FALSE	gi	16128567 GI:16128567	16128567 GI:16128567	ASAP:ABE-0002014|UniProtKB/Swiss-Prot:P05825|EcoGene:EG10293|GeneID:945193|						GCF_000005845.2_ASM584v2_genomic_29-OCT-2014 _iRT	>gi|16128567 GI:16128567|ASAP:ABE-0002014|UniProtKB/Swiss-Prot:P05825|EcoGene:EG10293|GeneID:945193|
2	_LYGNLDK_	_LYGNLDK_	LYGNLDK	-7.60381	16128567 GI:16128567	TRUE	_LYGNLDK_	411.721	noloss	4	y	1	489.267	9.87065	FALSE	gi	16128567 GI:16128567	16128567 GI:16128567	ASAP:ABE-0002014|UniProtKB/Swiss-Prot:P05825|EcoGene:EG10293|GeneID:945193|						GCF_000005845.2_ASM584v2_genomic_29-OCT-2014 _iRT	>gi|16128567 GI:16128567|ASAP:ABE-0002014|UniProtKB/Swiss-Prot:P05825|EcoGene:EG10293|GeneID:945193|
2	_LYGNLDK_	_LYGNLDK_	LYGNLDK	-7.60381	16128567 GI:16128567	TRUE	_LYGNLDK_	411.721	NH3	5	y	1	529.262	5.55057	FALSE	gi	16128567 GI:16128567	16128567 GI:16128567	ASAP:ABE-0002014|UniProtKB/Swiss-Prot:P05825|EcoGene:EG10293|GeneID:945193|						GCF_000005845.2_ASM584v2_genomic_29-OCT-2014 _iRT	>gi|16128567 GI:16128567|ASAP:ABE-0002014|UniProtKB/Swiss-Prot:P05825|EcoGene:EG10293|GeneID:945193|
2	_LYGNLDK_	_LYGNLDK_	LYGNLDK	-7.60381	16128567 GI:16128567	TRUE	_LYGNLDK_	411.721	noloss	5	y	1	546.288	100	FALSE	gi	16128567 GI:16128567	16128567 GI:16128567	ASAP:ABE-0002014|UniProtKB/Swiss-Prot:P05825|EcoGene:EG10293|GeneID:945193|						GCF_000005845.2_ASM584v2_genomic_29-OCT-2014 _iRT	>gi|16128567 GI:16128567|ASAP:ABE-0002014|UniProtKB/Swiss-Prot:P05825|EcoGene:EG10293|GeneID:945193|
2	_LYGNLDK_	_LYGNLDK_	LYGNLDK	-7.60381	16128567 GI:16128567	TRUE	_LYGNLDK_	411.721	NH3	6	y	1	692.325	5.1011	TRUE	gi	16128567 GI:16128567	16128567 GI:16128567	ASAP:ABE-0002014|UniProtKB/Swiss-Prot:P05825|EcoGene:EG10293|GeneID:945193|						GCF_000005845.2_ASM584v2_genomic_29-OCT-2014 _iRT	>gi|16128567 GI:16128567|ASAP:ABE-0002014|UniProtKB/Swiss-Prot:P05825|EcoGene:EG10293|GeneID:945193|
2	_LYGNLDK_	_LYGNLDK_	LYGNLDK	-7.60381	16128567 GI:16128567	TRUE	_LYGNLDK_	411.721	noloss	6	y	1	709.352	71.2276	FALSE	gi	16128567 GI:16128567	16128567 GI:16128567	ASAP:ABE-0002014|UniProtKB/Swiss-Prot:P05825|EcoGene:EG10293|GeneID:945193|						GCF_000005845.2_ASM584v2_genomic_29-OCT-2014 _iRT	>gi|16128567 GI:16128567|ASAP:ABE-0002014|UniProtKB/Swiss-Prot:P05825|EcoGene:EG10293|GeneID:945193|
3	_KVLGFITDAGGR_	_KVLGFITDAGGR_	KVLGFITDAGGR	30.2881	16130342 GI:16130342	TRUE	_KVLGFITDAGGR_	411.903	NH3	4	y	1	343.172	6.46744	TRUE	gi	16130342 GI:16130342	16130342 GI:16130342	ASAP:ABE-0007967|UniProtKB/Swiss-Prot:P08839|EcoGene:EG10789|GeneID:946879|						GCF_000005845.2_ASM584v2_genomic_29-OCT-2014 _iRT	>gi|16130342 GI:16130342|ASAP:ABE-0007967|UniProtKB/Swiss-Prot:P08839|EcoGene:EG10789|GeneID:946879|
3	_KVLGFITDAGGR_	_KVLGFITDAGGR_	KVLGFITDAGGR	30.2881	16130342 GI:16130342	TRUE	_KVLGFITDAGGR_	411.903	noloss	7	y	2	345.182	5.9157	TRUE	gi	16130342 GI:16130342	16130342 GI:16130342	ASAP:ABE-0007967|UniProtKB/Swiss-Prot:P08839|EcoGene:EG10789|GeneID:946879|						GCF_000005845.2_ASM584v2_genomic_29-OCT-2014 _iRT	>gi|16130342 GI:16130342|ASAP:ABE-0007967|UniProtKB/Swiss-Prot:P08839|EcoGene:EG10789|GeneID:946879|
3	_KVLGFITDAGGR_	_KVLGFITDAGGR_	KVLGFITDAGGR	30.2881	16130342 GI:16130342	TRUE	_KVLGFITDAGGR_	411.903	noloss	4	y	1	360.199	100	FALSE	gi	16130342 GI:16130342	16130342 GI:16130342	ASAP:ABE-0007967|UniProtKB/Swiss-Prot:P08839|EcoGene:EG10789|GeneID:946879|						GCF_000005845.2_ASM584v2_genomic_29-OCT-2014 _iRT	>gi|16130342 GI:16130342|ASAP:ABE-0007967|UniProtKB/Swiss-Prot:P08839|EcoGene:EG10789|GeneID:946879|
3	_KVLGFITDAGGR_	_KVLGFITDAGGR_	KVLGFITDAGGR	30.2881	16130342 GI:16130342	TRUE	_KVLGFITDAGGR_	411.903	noloss	4	b	1	398.276	6.58885	TRUE	gi	16130342 GI:16130342	16130342 GI:16130342	ASAP:ABE-0007967|UniProtKB/Swiss-Prot:P08839|EcoGene:EG10789|GeneID:946879|						GCF_000005845.2_ASM584v2_genomic_29-OCT-2014 _iRT	>gi|16130342 GI:16130342|ASAP:ABE-0007967|UniProtKB/Swiss-Prot:P08839|EcoGene:EG10789|GeneID:946879|
3	_KVLGFITDAGGR_	_KVLGFITDAGGR_	KVLGFITDAGGR	30.2881	16130342 GI:16130342	TRUE	_KVLGFITDAGGR_	411.903	H2O	5	y	1	457.215	5.9013	TRUE	gi	16130342 GI:16130342	16130342 GI:16130342	ASAP:ABE-0007967|UniProtKB/Swiss-Prot:P08839|EcoGene:EG10789|GeneID:946879|						GCF_000005845.2_ASM584v2_genomic_29-OCT-2014 _iRT	>gi|16130342 GI:16130342|ASAP:ABE-0007967|UniProtKB/Swiss-Prot:P08839|EcoGene:EG10789|GeneID:946879|
3	_KVLGFITDAGGR_	_KVLGFITDAGGR_	KVLGFITDAGGR	30.2881	16130342 GI:16130342	TRUE	_KVLGFITDAGGR_	411.903	NH3	5	y	1	458.199	5.26146	TRUE	gi	16130342 GI:16130342	16130342 GI:16130342	ASAP:ABE-0007967|UniProtKB/Swiss-Prot:P08839|EcoGene:EG10789|GeneID:946879|						GCF_000005845.2_ASM584v2_genomic_29-OCT-2014 _iRT	>gi|16130342 GI:16130342|ASAP:ABE-0007967|UniProtKB/Swiss-Prot:P08839|EcoGene:EG10789|GeneID:946879|
3	_KVLGFITDAGGR_	_KVLGFITDAGGR_	KVLGFITDAGGR	30.2881	16130342 GI:16130342	TRUE	_KVLGFITDAGGR_	411.903	noloss	5	y	1	475.226	67.7461	FALSE	gi	16130342 GI:16130342	16130342 GI:16130342	ASAP:ABE-0007967|UniProtKB/Swiss-Prot:P08839|EcoGene:EG10789|GeneID:946879|						GCF_000005845.2_ASM584v2_genomic_29-OCT-2014 _iRT	>gi|16130342 GI:16130342|ASAP:ABE-0007967|UniProtKB/Swiss-Prot:P08839|EcoGene:EG10789|GeneID:946879|
3	_KVLGFITDAGGR_	_KVLGFITDAGGR_	KVLGFITDAGGR	30.2881	16130342 GI:16130342	TRUE	_KVLGFITDAGGR_	411.903	noloss	5	b	1	545.345	54.0447	FALSE	gi	16130342 GI:16130342	16130342 GI:16130342	ASAP:ABE-0007967|UniProtKB/Swiss-Prot:P08839|EcoGene:EG10789|GeneID:946879|						GCF_000005845.2_ASM584v2_genomic_29-OCT-2014 _iRT	>gi|16130342 GI:16130342|ASAP:ABE-0007967|UniProtKB/Swiss-Prot:P08839|EcoGene:EG10789|GeneID:946879|
3	_KVLGFITDAGGR_	_KVLGFITDAGGR_	KVLGFITDAGGR	30.2881	16130342 GI:16130342	TRUE	_KVLGFITDAGGR_	411.903	H2O	6	y	1	558.263	7.51016	FALSE	gi	16130342 GI:16130342	16130342 GI:16130342	ASAP:ABE-0007967|UniProtKB/Swiss-Prot:P08839|EcoGene:EG10789|GeneID:946879|						GCF_000005845.2_ASM584v2_genomic_29-OCT-2014 _iRT	>gi|16130342 GI:16130342|ASAP:ABE-0007967|UniProtKB/Swiss-Prot:P08839|EcoGene:EG10789|GeneID:946879|
3	_KVLGFITDAGGR_	_KVLGFITDAGGR_	KVLGFITDAGGR	30.2881	16130342 GI:16130342	TRUE	_KVLGFITDAGGR_	411.903	noloss	6	y	1	576.274	55.0351	FALSE	gi	16130342 GI:16130342	16130342 GI:16130342	ASAP:ABE-0007967|UniProtKB/Swiss-Prot:P08839|EcoGene:EG10789|GeneID:946879|						GCF_000005845.2_ASM584v2_genomic_29-OCT-2014 _iRT	>gi|16130342 GI:16130342|ASAP:ABE-0007967|UniProtKB/Swiss-Prot:P08839|EcoGene:EG10789|GeneID:946879|
3	_KVLGFITDAGGR_	_KVLGFITDAGGR_	KVLGFITDAGGR	30.2881	16130342 GI:16130342	TRUE	_KVLGFITDAGGR_	411.903	noloss	6	b	1	658.429	13.2383	FALSE	gi	16130342 GI:16130342	16130342 GI:16130342	ASAP:ABE-0007967|UniProtKB/Swiss-Prot:P08839|EcoGene:EG10789|GeneID:946879|						GCF_000005845.2_ASM584v2_genomic_29-OCT-2014 _iRT	>gi|16130342 GI:16130342|ASAP:ABE-0007967|UniProtKB/Swiss-Prot:P08839|EcoGene:EG10789|GeneID:946879|
2	_LFMDAVK_	_LFMDAVK_	LFMDAVK	26.4646	16128166 GI:16128166	TRUE	_LFMDAVK_	412.223	noloss	3	y	1	317.218	40.9164	FALSE	gi	16128166 GI:16128166	16128166 GI:16128166	ASAP:ABE-0000592|UniProtKB/Swiss-Prot:P45568|EcoGene:EG12715|GeneID:945019|						GCF_000005845.2_ASM584v2_genomic_29-OCT-2014 _iRT	>gi|16128166 GI:16128166|ASAP:ABE-0000592|UniProtKB/Swiss-Prot:P45568|EcoGene:EG12715|GeneID:945019|
2	_LFMDAVK_	_LFMDAVK_	LFMDAVK	26.4646	16128166 GI:16128166	TRUE	_LFMDAVK_	412.223	noloss	4	y	1	432.245	33.2497	FALSE	gi	16128166 GI:16128166	16128166 GI:16128166	ASAP:ABE-0000592|UniProtKB/Swiss-Prot:P45568|EcoGene:EG12715|GeneID:945019|						GCF_000005845.2_ASM584v2_genomic_29-OCT-2014 _iRT	>gi|16128166 GI:16128166|ASAP:ABE-0000592|UniProtKB/Swiss-Prot:P45568|EcoGene:EG12715|GeneID:945019|
2	_LFMDAVK_	_LFMDAVK_	LFMDAVK	26.4646	16128166 GI:16128166	TRUE	_LFMDAVK_	412.223	noloss	5	y	1	563.286	100	FALSE	gi	16128166 GI:16128166	16128166 GI:16128166	ASAP:ABE-0000592|UniProtKB/Swiss-Prot:P45568|EcoGene:EG12715|GeneID:945019|						GCF_000005845.2_ASM584v2_genomic_29-OCT-2014 _iRT	>gi|16128166 GI:16128166|ASAP:ABE-0000592|UniProtKB/Swiss-Prot:P45568|EcoGene:EG12715|GeneID:945019|
2	_LFMDAVK_	_LFMDAVK_	LFMDAVK	26.4646	16128166 GI:16128166	TRUE	_LFMDAVK_	412.223	noloss	6	y	1	710.354	78.7121	FALSE	gi	16128166 GI:16128166	16128166 GI:16128166	ASAP:ABE-0000592|UniProtKB/Swiss-Prot:P45568|EcoGene:EG12715|GeneID:945019|						GCF_000005845.2_ASM584v2_genomic_29-OCT-2014 _iRT	>gi|16128166 GI:16128166|ASAP:ABE-0000592|UniProtKB/Swiss-Prot:P45568|EcoGene:EG12715|GeneID:945019|
2	_VIADHIR_	_VIADHIR_	VIADHIR	-29.3132	16130604 GI:16130604	TRUE	_VIADHIR_	412.243	noloss	5	y	2	306.167	9.3521	TRUE	gi	16130604 GI:16130604	16130604 GI:16130604	ASAP:ABE-0008869|UniProtKB/Swiss-Prot:P00957|EcoGene:EG10034|GeneID:947175|						GCF_000005845.2_ASM584v2_genomic_29-OCT-2014 _iRT	>gi|16130604 GI:16130604|ASAP:ABE-0008869|UniProtKB/Swiss-Prot:P00957|EcoGene:EG10034|GeneID:947175|
2	_VIADHIR_	_VIADHIR_	VIADHIR	-29.3132	16130604 GI:16130604	TRUE	_VIADHIR_	412.243	noloss	6	y	2	362.709	7.638	TRUE	gi	16130604 GI:16130604	16130604 GI:16130604	ASAP:ABE-0008869|UniProtKB/Swiss-Prot:P00957|EcoGene:EG10034|GeneID:947175|						GCF_000005845.2_ASM584v2_genomic_29-OCT-2014 _iRT	>gi|16130604 GI:16130604|ASAP:ABE-0008869|UniProtKB/Swiss-Prot:P00957|EcoGene:EG10034|GeneID:947175|
2	_VIADHIR_	_VIADHIR_	VIADHIR	-29.3132	16130604 GI:16130604	TRUE	_VIADHIR_	412.243	NH3	3	y	1	408.235	7.39627	TRUE	gi	16130604 GI:16130604	16130604 GI:16130604	ASAP:ABE-0008869|UniProtKB/Swiss-Prot:P00957|EcoGene:EG10034|GeneID:947175|						GCF_000005845.2_ASM584v2_genomic_29-OCT-2014 _iRT	>gi|16130604 GI:16130604|ASAP:ABE-0008869|UniProtKB/Swiss-Prot:P00957|EcoGene:EG10034|GeneID:947175|
2	_VIADHIR_	_VIADHIR_	VIADHIR	-29.3132	16130604 GI:16130604	TRUE	_VIADHIR_	412.243	noloss	3	y	1	425.262	71.4159	FALSE	gi	16130604 GI:16130604	16130604 GI:16130604	ASAP:ABE-0008869|UniProtKB/Swiss-Prot:P00957|EcoGene:EG10034|GeneID:947175|						GCF_000005845.2_ASM584v2_genomic_29-OCT-2014 _iRT	>gi|16130604 GI:16130604|ASAP:ABE-0008869|UniProtKB/Swiss-Prot:P00957|EcoGene:EG10034|GeneID:947175|
2	_VIADHIR_	_VIADHIR_	VIADHIR	-29.3132	16130604 GI:16130604	TRUE	_VIADHIR_	412.243	noloss	4	y	1	540.289	16.1334	FALSE	gi	16130604 GI:16130604	16130604 GI:16130604	ASAP:ABE-0008869|UniProtKB/Swiss-Prot:P00957|EcoGene:EG10034|GeneID:947175|						GCF_000005845.2_ASM584v2_genomic_29-OCT-2014 _iRT	>gi|16130604 GI:16130604|ASAP:ABE-0008869|UniProtKB/Swiss-Prot:P00957|EcoGene:EG10034|GeneID:947175|
2	_VIADHIR_	_VIADHIR_	VIADHIR	-29.3132	16130604 GI:16130604	TRUE	_VIADHIR_	412.243	H2O	5	y	1	593.315	20.7243	FALSE	gi	16130604 GI:16130604	16130604 GI:16130604	ASAP:ABE-0008869|UniProtKB/Swiss-Prot:P00957|EcoGene:EG10034|GeneID:947175|						GCF_000005845.2_ASM584v2_genomic_29-OCT-2014 _iRT	>gi|16130604 GI:16130604|ASAP:ABE-0008869|UniProtKB/Swiss-Prot:P00957|EcoGene:EG10034|GeneID:947175|
2	_VIADHIR_	_VIADHIR_	VIADHIR	-29.3132	16130604 GI:16130604	TRUE	_VIADHIR_	412.243	NH3	5	y	1	594.299	14.2732	FALSE	gi	16130604 GI:16130604	16130604 GI:16130604	ASAP:ABE-0008869|UniProtKB/Swiss-Prot:P00957|EcoGene:EG10034|GeneID:947175|						GCF_000005845.2_ASM584v2_genomic_29-OCT-2014 _iRT	>gi|16130604 GI:16130604|ASAP:ABE-0008869|UniProtKB/Swiss-Prot:P00957|EcoGene:EG10034|GeneID:947175|
2	_VIADHIR_	_VIADHIR_	VIADHIR	-29.3132	16130604 GI:16130604	TRUE	_VIADHIR_	412.243	noloss	5	y	1	611.326	100	FALSE	gi	16130604 GI:16130604	16130604 GI:16130604	ASAP:ABE-0008869|UniProtKB/Swiss-Prot:P00957|EcoGene:EG10034|GeneID:947175|						GCF_000005845.2_ASM584v2_genomic_29-OCT-2014 _iRT	>gi|16130604 GI:16130604|ASAP:ABE-0008869|UniProtKB/Swiss-Prot:P00957|EcoGene:EG10034|GeneID:947175|
2	_VIADHIR_	_VIADHIR_	VIADHIR	-29.3132	16130604 GI:16130604	TRUE	_VIADHIR_	412.243	noloss	6	y	1	724.41	10.4063	FALSE	gi	16130604 GI:16130604	16130604 GI:16130604	ASAP:ABE-0008869|UniProtKB/Swiss-Prot:P00957|EcoGene:EG10034|GeneID:947175|						GCF_000005845.2_ASM584v2_genomic_29-OCT-2014 _iRT	>gi|16130604 GI:16130604|ASAP:ABE-0008869|UniProtKB/Swiss-Prot:P00957|EcoGene:EG10034|GeneID:947175|
2	_LGAFFIR_	_LGAFFIR_	LGAFFIR	51.1635	90111678 GI:90111678	TRUE	_LGAFFIR_	412.245	NH3	3	y	1	418.245	6.4676	FALSE	gi	90111678 GI:90111678	90111678 GI:90111678	ASAP:ABE-0013232|UniProtKB/Swiss-Prot:P0A7A7|EcoGene:EG10740|GeneID:948541|						GCF_000005845.2_ASM584v2_genomic_29-OCT-2014 _iRT	>gi|90111678 GI:90111678|ASAP:ABE-0013232|UniProtKB/Swiss-Prot:P0A7A7|EcoGene:EG10740|GeneID:948541|
2	_LGAFFIR_	_LGAFFIR_	LGAFFIR	51.1635	90111678 GI:90111678	TRUE	_LGAFFIR_	412.245	noloss	3	y	1	435.271	23.2281	FALSE	gi	90111678 GI:90111678	90111678 GI:90111678	ASAP:ABE-0013232|UniProtKB/Swiss-Prot:P0A7A7|EcoGene:EG10740|GeneID:948541|						GCF_000005845.2_ASM584v2_genomic_29-OCT-2014 _iRT	>gi|90111678 GI:90111678|ASAP:ABE-0013232|UniProtKB/Swiss-Prot:P0A7A7|EcoGene:EG10740|GeneID:948541|
2	_LGAFFIR_	_LGAFFIR_	LGAFFIR	51.1635	90111678 GI:90111678	TRUE	_LGAFFIR_	412.245	noloss	4	y	1	582.34	25.9628	FALSE	gi	90111678 GI:90111678	90111678 GI:90111678	ASAP:ABE-0013232|UniProtKB/Swiss-Prot:P0A7A7|EcoGene:EG10740|GeneID:948541|						GCF_000005845.2_ASM584v2_genomic_29-OCT-2014 _iRT	>gi|90111678 GI:90111678|ASAP:ABE-0013232|UniProtKB/Swiss-Prot:P0A7A7|EcoGene:EG10740|GeneID:948541|
2	_LGAFFIR_	_LGAFFIR_	LGAFFIR	51.1635	90111678 GI:90111678	TRUE	_LGAFFIR_	412.245	noloss	5	y	1	653.377	26.5022	FALSE	gi	90111678 GI:90111678	90111678 GI:90111678	ASAP:ABE-0013232|UniProtKB/Swiss-Prot:P0A7A7|EcoGene:EG10740|GeneID:948541|						GCF_000005845.2_ASM584v2_genomic_29-OCT-2014 _iRT	>gi|90111678 GI:90111678|ASAP:ABE-0013232|UniProtKB/Swiss-Prot:P0A7A7|EcoGene:EG10740|GeneID:948541|
2	_LGAFFIR_	_LGAFFIR_	LGAFFIR	51.1635	90111678 GI:90111678	TRUE	_LGAFFIR_	412.245	noloss	6	y	1	710.398	100	FALSE	gi	90111678 GI:90111678	90111678 GI:90111678	ASAP:ABE-0013232|UniProtKB/Swiss-Prot:P0A7A7|EcoGene:EG10740|GeneID:948541|						GCF_000005845.2_ASM584v2_genomic_29-OCT-2014 _iRT	>gi|90111678 GI:90111678|ASAP:ABE-0013232|UniProtKB/Swiss-Prot:P0A7A7|EcoGene:EG10740|GeneID:948541|
3	_FIDGMHEAGMK_	_FIDGMHEAGMK_	FIDGMHEAGMK	11.7992	16129070 GI:16129070	TRUE	_FIDGMHEAGMK_	412.523	noloss	8	b	3	301.134	11.354	TRUE	gi	16129070 GI:16129070	16129070 GI:16129070	ASAP:ABE-0003737|UniProtKB/Swiss-Prot:P75949|EcoGene:EG13433|GeneID:945671|						GCF_000005845.2_ASM584v2_genomic_29-OCT-2014 _iRT	>gi|16129070 GI:16129070|ASAP:ABE-0003737|UniProtKB/Swiss-Prot:P75949|EcoGene:EG13433|GeneID:945671|
3	_FIDGMHEAGMK_	_FIDGMHEAGMK_	FIDGMHEAGMK	11.7992	16129070 GI:16129070	TRUE	_FIDGMHEAGMK_	412.523	H2O	9	b	3	314.138	26.476	TRUE	gi	16129070 GI:16129070	16129070 GI:16129070	ASAP:ABE-0003737|UniProtKB/Swiss-Prot:P75949|EcoGene:EG13433|GeneID:945671|						GCF_000005845.2_ASM584v2_genomic_29-OCT-2014 _iRT	>gi|16129070 GI:16129070|ASAP:ABE-0003737|UniProtKB/Swiss-Prot:P75949|EcoGene:EG13433|GeneID:945671|
3	_FIDGMHEAGMK_	_FIDGMHEAGMK_	FIDGMHEAGMK	11.7992	16129070 GI:16129070	TRUE	_FIDGMHEAGMK_	412.523	noloss	9	b	3	320.141	13.0378	TRUE	gi	16129070 GI:16129070	16129070 GI:16129070	ASAP:ABE-0003737|UniProtKB/Swiss-Prot:P75949|EcoGene:EG13433|GeneID:945671|						GCF_000005845.2_ASM584v2_genomic_29-OCT-2014 _iRT	>gi|16129070 GI:16129070|ASAP:ABE-0003737|UniProtKB/Swiss-Prot:P75949|EcoGene:EG13433|GeneID:945671|
3	_FIDGMHEAGMK_	_FIDGMHEAGMK_	FIDGMHEAGMK	11.7992	16129070 GI:16129070	TRUE	_FIDGMHEAGMK_	412.523	noloss	3	y	1	335.175	25.1678	TRUE	gi	16129070 GI:16129070	16129070 GI:16129070	ASAP:ABE-0003737|UniProtKB/Swiss-Prot:P75949|EcoGene:EG13433|GeneID:945671|						GCF_000005845.2_ASM584v2_genomic_29-OCT-2014 _iRT	>gi|16129070 GI:16129070|ASAP:ABE-0003737|UniProtKB/Swiss-Prot:P75949|EcoGene:EG13433|GeneID:945671|
3	_FIDGMHEAGMK_	_FIDGMHEAGMK_	FIDGMHEAGMK	11.7992	16129070 GI:16129070	TRUE	_FIDGMHEAGMK_	412.523	noloss	6	y	2	336.66	95.45	FALSE	gi	16129070 GI:16129070	16129070 GI:16129070	ASAP:ABE-0003737|UniProtKB/Swiss-Prot:P75949|EcoGene:EG13433|GeneID:945671|						GCF_000005845.2_ASM584v2_genomic_29-OCT-2014 _iRT	>gi|16129070 GI:16129070|ASAP:ABE-0003737|UniProtKB/Swiss-Prot:P75949|EcoGene:EG13433|GeneID:945671|
3	_FIDGMHEAGMK_	_FIDGMHEAGMK_	FIDGMHEAGMK	11.7992	16129070 GI:16129070	TRUE	_FIDGMHEAGMK_	412.523	noloss	7	y	2	402.181	17.4825	TRUE	gi	16129070 GI:16129070	16129070 GI:16129070	ASAP:ABE-0003737|UniProtKB/Swiss-Prot:P75949|EcoGene:EG13433|GeneID:945671|						GCF_000005845.2_ASM584v2_genomic_29-OCT-2014 _iRT	>gi|16129070 GI:16129070|ASAP:ABE-0003737|UniProtKB/Swiss-Prot:P75949|EcoGene:EG13433|GeneID:945671|
3	_FIDGMHEAGMK_	_FIDGMHEAGMK_	FIDGMHEAGMK	11.7992	16129070 GI:16129070	TRUE	_FIDGMHEAGMK_	412.523	noloss	4	y	1	406.212	75.0312	FALSE	gi	16129070 GI:16129070	16129070 GI:16129070	ASAP:ABE-0003737|UniProtKB/Swiss-Prot:P75949|EcoGene:EG13433|GeneID:945671|						GCF_000005845.2_ASM584v2_genomic_29-OCT-2014 _iRT	>gi|16129070 GI:16129070|ASAP:ABE-0003737|UniProtKB/Swiss-Prot:P75949|EcoGene:EG13433|GeneID:945671|
3	_FIDGMHEAGMK_	_FIDGMHEAGMK_	FIDGMHEAGMK	11.7992	16129070 GI:16129070	TRUE	_FIDGMHEAGMK_	412.523	H2O	8	y	2	421.686	6.19304	TRUE	gi	16129070 GI:16129070	16129070 GI:16129070	ASAP:ABE-0003737|UniProtKB/Swiss-Prot:P75949|EcoGene:EG13433|GeneID:945671|						GCF_000005845.2_ASM584v2_genomic_29-OCT-2014 _iRT	>gi|16129070 GI:16129070|ASAP:ABE-0003737|UniProtKB/Swiss-Prot:P75949|EcoGene:EG13433|GeneID:945671|
3	_FIDGMHEAGMK_	_FIDGMHEAGMK_	FIDGMHEAGMK	11.7992	16129070 GI:16129070	TRUE	_FIDGMHEAGMK_	412.523	noloss	8	y	2	430.691	58.813	FALSE	gi	16129070 GI:16129070	16129070 GI:16129070	ASAP:ABE-0003737|UniProtKB/Swiss-Prot:P75949|EcoGene:EG13433|GeneID:945671|						GCF_000005845.2_ASM584v2_genomic_29-OCT-2014 _iRT	>gi|16129070 GI:16129070|ASAP:ABE-0003737|UniProtKB/Swiss-Prot:P75949|EcoGene:EG13433|GeneID:945671|
3	_FIDGMHEAGMK_	_FIDGMHEAGMK_	FIDGMHEAGMK	11.7992	16129070 GI:16129070	TRUE	_FIDGMHEAGMK_	412.523	NH3	9	b	2	471.195	5.1596	TRUE	gi	16129070 GI:16129070	16129070 GI:16129070	ASAP:ABE-0003737|UniProtKB/Swiss-Prot:P75949|EcoGene:EG13433|GeneID:945671|						GCF_000005845.2_ASM584v2_genomic_29-OCT-2014 _iRT	>gi|16129070 GI:16129070|ASAP:ABE-0003737|UniProtKB/Swiss-Prot:P75949|EcoGene:EG13433|GeneID:945671|
3	_FIDGMHEAGMK_	_FIDGMHEAGMK_	FIDGMHEAGMK	11.7992	16129070 GI:16129070	TRUE	_FIDGMHEAGMK_	412.523	H2O	9	y	2	479.199	11.3155	TRUE	gi	16129070 GI:16129070	16129070 GI:16129070	ASAP:ABE-0003737|UniProtKB/Swiss-Prot:P75949|EcoGene:EG13433|GeneID:945671|						GCF_000005845.2_ASM584v2_genomic_29-OCT-2014 _iRT	>gi|16129070 GI:16129070|ASAP:ABE-0003737|UniProtKB/Swiss-Prot:P75949|EcoGene:EG13433|GeneID:945671|
3	_FIDGMHEAGMK_	_FIDGMHEAGMK_	FIDGMHEAGMK	11.7992	16129070 GI:16129070	TRUE	_FIDGMHEAGMK_	412.523	noloss	9	b	2	479.708	10.2939	TRUE	gi	16129070 GI:16129070	16129070 GI:16129070	ASAP:ABE-0003737|UniProtKB/Swiss-Prot:P75949|EcoGene:EG13433|GeneID:945671|						GCF_000005845.2_ASM584v2_genomic_29-OCT-2014 _iRT	>gi|16129070 GI:16129070|ASAP:ABE-0003737|UniProtKB/Swiss-Prot:P75949|EcoGene:EG13433|GeneID:945671|
3	_FIDGMHEAGMK_	_FIDGMHEAGMK_	FIDGMHEAGMK	11.7992	16129070 GI:16129070	TRUE	_FIDGMHEAGMK_	412.523	noloss	9	y	2	488.205	64.9511	FALSE	gi	16129070 GI:16129070	16129070 GI:16129070	ASAP:ABE-0003737|UniProtKB/Swiss-Prot:P75949|EcoGene:EG13433|GeneID:945671|						GCF_000005845.2_ASM584v2_genomic_29-OCT-2014 _iRT	>gi|16129070 GI:16129070|ASAP:ABE-0003737|UniProtKB/Swiss-Prot:P75949|EcoGene:EG13433|GeneID:945671|
3	_FIDGMHEAGMK_	_FIDGMHEAGMK_	FIDGMHEAGMK	11.7992	16129070 GI:16129070	TRUE	_FIDGMHEAGMK_	412.523	H2O	5	y	1	517.244	23.3368	TRUE	gi	16129070 GI:16129070	16129070 GI:16129070	ASAP:ABE-0003737|UniProtKB/Swiss-Prot:P75949|EcoGene:EG13433|GeneID:945671|						GCF_000005845.2_ASM584v2_genomic_29-OCT-2014 _iRT	>gi|16129070 GI:16129070|ASAP:ABE-0003737|UniProtKB/Swiss-Prot:P75949|EcoGene:EG13433|GeneID:945671|
3	_FIDGMHEAGMK_	_FIDGMHEAGMK_	FIDGMHEAGMK	11.7992	16129070 GI:16129070	TRUE	_FIDGMHEAGMK_	412.523	NH3	5	y	1	518.228	10.4301	TRUE	gi	16129070 GI:16129070	16129070 GI:16129070	ASAP:ABE-0003737|UniProtKB/Swiss-Prot:P75949|EcoGene:EG13433|GeneID:945671|						GCF_000005845.2_ASM584v2_genomic_29-OCT-2014 _iRT	>gi|16129070 GI:16129070|ASAP:ABE-0003737|UniProtKB/Swiss-Prot:P75949|EcoGene:EG13433|GeneID:945671|
3	_FIDGMHEAGMK_	_FIDGMHEAGMK_	FIDGMHEAGMK	11.7992	16129070 GI:16129070	TRUE	_FIDGMHEAGMK_	412.523	noloss	5	y	1	535.254	68.5212	FALSE	gi	16129070 GI:16129070	16129070 GI:16129070	ASAP:ABE-0003737|UniProtKB/Swiss-Prot:P75949|EcoGene:EG13433|GeneID:945671|						GCF_000005845.2_ASM584v2_genomic_29-OCT-2014 _iRT	>gi|16129070 GI:16129070|ASAP:ABE-0003737|UniProtKB/Swiss-Prot:P75949|EcoGene:EG13433|GeneID:945671|
3	_FIDGMHEAGMK_	_FIDGMHEAGMK_	FIDGMHEAGMK	11.7992	16129070 GI:16129070	TRUE	_FIDGMHEAGMK_	412.523	noloss	10	y	2	544.747	10.1549	TRUE	gi	16129070 GI:16129070	16129070 GI:16129070	ASAP:ABE-0003737|UniProtKB/Swiss-Prot:P75949|EcoGene:EG13433|GeneID:945671|						GCF_000005845.2_ASM584v2_genomic_29-OCT-2014 _iRT	>gi|16129070 GI:16129070|ASAP:ABE-0003737|UniProtKB/Swiss-Prot:P75949|EcoGene:EG13433|GeneID:945671|
3	_FIDGMHEAGMK_	_FIDGMHEAGMK_	FIDGMHEAGMK	11.7992	16129070 GI:16129070	TRUE	_FIDGMHEAGMK_	412.523	noloss	10	b	2	545.228	10.5898	TRUE	gi	16129070 GI:16129070	16129070 GI:16129070	ASAP:ABE-0003737|UniProtKB/Swiss-Prot:P75949|EcoGene:EG13433|GeneID:945671|						GCF_000005845.2_ASM584v2_genomic_29-OCT-2014 _iRT	>gi|16129070 GI:16129070|ASAP:ABE-0003737|UniProtKB/Swiss-Prot:P75949|EcoGene:EG13433|GeneID:945671|
3	_FIDGMHEAGMK_	_FIDGMHEAGMK_	FIDGMHEAGMK	11.7992	16129070 GI:16129070	TRUE	_FIDGMHEAGMK_	412.523	H2O	6	y	1	654.303	11.795	TRUE	gi	16129070 GI:16129070	16129070 GI:16129070	ASAP:ABE-0003737|UniProtKB/Swiss-Prot:P75949|EcoGene:EG13433|GeneID:945671|						GCF_000005845.2_ASM584v2_genomic_29-OCT-2014 _iRT	>gi|16129070 GI:16129070|ASAP:ABE-0003737|UniProtKB/Swiss-Prot:P75949|EcoGene:EG13433|GeneID:945671|
3	_FIDGMHEAGMK_	_FIDGMHEAGMK_	FIDGMHEAGMK	11.7992	16129070 GI:16129070	TRUE	_FIDGMHEAGMK_	412.523	noloss	6	y	1	672.313	100	FALSE	gi	16129070 GI:16129070	16129070 GI:16129070	ASAP:ABE-0003737|UniProtKB/Swiss-Prot:P75949|EcoGene:EG13433|GeneID:945671|						GCF_000005845.2_ASM584v2_genomic_29-OCT-2014 _iRT	>gi|16129070 GI:16129070|ASAP:ABE-0003737|UniProtKB/Swiss-Prot:P75949|EcoGene:EG13433|GeneID:945671|
3	_FIDGMHEAGMK_	_FIDGMHEAGMK_	FIDGMHEAGMK	11.7992	16129070 GI:16129070	TRUE	_FIDGMHEAGMK_	412.523	H2O	6	b	1	683.297	7.62815	TRUE	gi	16129070 GI:16129070	16129070 GI:16129070	ASAP:ABE-0003737|UniProtKB/Swiss-Prot:P75949|EcoGene:EG13433|GeneID:945671|						GCF_000005845.2_ASM584v2_genomic_29-OCT-2014 _iRT	>gi|16129070 GI:16129070|ASAP:ABE-0003737|UniProtKB/Swiss-Prot:P75949|EcoGene:EG13433|GeneID:945671|
3	_FIDGMHEAGMK_	_FIDGMHEAGMK_	FIDGMHEAGMK	11.7992	16129070 GI:16129070	TRUE	_FIDGMHEAGMK_	412.523	noloss	7	y	1	803.354	6.95448	TRUE	gi	16129070 GI:16129070	16129070 GI:16129070	ASAP:ABE-0003737|UniProtKB/Swiss-Prot:P75949|EcoGene:EG13433|GeneID:945671|						GCF_000005845.2_ASM584v2_genomic_29-OCT-2014 _iRT	>gi|16129070 GI:16129070|ASAP:ABE-0003737|UniProtKB/Swiss-Prot:P75949|EcoGene:EG13433|GeneID:945671|
[truncated: 394,005+ more rows]

## Sheet: MG1655
PrecursorCharge	IntModifiedPeptide	ModifiedPeptide	StrippedPeptide	iRT	BGSInferenceId	IsProteotypic	LabeledPeptide	PrecursorMz	FragmentLossType	FragmentNumber	FragmentType	FragmentCharge	FragmentMz	RelativeIntensity	ExcludeFromAssay	Database	ProteinGroups	UniProtIds	Protein Name	ProteinDescription	Organisms	Genes	Protein Existence	Sequence Version	FASTAName	FASTAHeader
[truncated: 178,779 more rows]
