# Supplementary material for: Multifaceted Stoichiometry Control of Bacterial Operons Revealed by Deep Proteome Quantification
Source: Front Genet. 2019 May 24;10:473. doi: 10.3389/fgene.2019.00473 (PMC6544118; doi:10.3389/fgene.2019.00473)
Supplement: FIGURE S1 — Physical and chemical features of quantified and unquantified proteins in E. coli. Panels (A–D) are distributions of protein isoelectric point, instability, protein length, and hydrophobicity. Instability tests a protein for stability, which value above 40 means the protein has a shorter half-life. The Kolmogorov–Smirnov test (KS-test) was used to test the distribution between quantified and unquantified proteins. Significance different were found between quantified and unquantified proteins indicated different physical–chemical characterizations of them. [file Data_Sheet_1.zip › Supplementary table S3 Protein abundances and properties used in this work.xlsx]

## Sheet: BW25113
Symbols	GI	OperonID	Synonym	Start	End	Strand	Length	COG_number	Complex/Pathway	Product	peptides number identified with relex criteria	peptides number identified with stringent criteria	BW25113_1 abundance with relex criteria	BW25113_2 abundance with relex criteria	BW25113_1 protein abundance with stringent criteria	BW25113_2 protein abundance with stringent criteria	BW25113_1 protein copy number with stringent criteria	BW25113_2 protein copy number with stringent criteria	Average protein copy number per cell
mhpR	145698223	3072	b0346	366811	367644	-	277	COG1414K	P	DNA-binding transcriptional activator, 3HPP-binding	4	4	616279	707484	550059	555866	63.3519	64.0206	63.6863
ybeZ	145698230	3133	b0660	691561	692601	-	346	COG1702T	P	predicted protein with nucleoside triphosphate hydrolase domain	10	10	9229322	8539002	5997808	5.56487e+06	690.784	640.921	665.853
gsiA	145698235	3167	b0829	866743	868614	+	623	COG1123R	P	glutathione transporter ATP-binding protein, ABC superfamily	3	3	143053	224388	1.08769e+06	1092287	125.272	125.802	125.537
lolA	145698236	3180	b0891	936595	937206	+	203	COG2834M	P	chaperone for lipoproteins	7	7	1.35159e+06	1.49517e+06	1.21346e+06	1.32232e+06	139.757	152.296	146.027
pqiC	145698237	3191	b0952	1014119	1014682	+	187	COG3009S	P	conserved protein	5	5	565501	491870	625475	426216	72.0377	49.0885	60.5631
rlmI	145698239	3194	b0967	1028002	1029192	-	396	COG1092R	P	23S rRNA m(5)C1962 methyltransferase, SAM-dependent	11	11	3036544	3.22969e+06	3.33994e+06	3381971	384.671	389.511	387.091
hrpA	145698255	1382493	b1413	1481085	1484987	+	1300	COG1643L	P	predicted ATP-dependent helicase	19	19	1.71745e+06	1.74385e+06	2585260	1.4668e+06	297.752	168.935	233.343
opgD	145698256	1382494	b1424	1494880	1496535	+	551	COG3131P	P	osmoregulated periplasmic glucan (OPG) biosynthesis periplasmic protein	12	12	2.50276e+06	2744207	1655482	1.66193e+06	190.667	191.409	191.038
dosC	145698262	3280	b1490	1563782	1565164	-	460	COG2199T	C	diguanylate cyclase; cold- and stationary phase-induced oxygen-dependent biofilm regulator; positively regulates csgBAC and pgaABCD	2	2	735404	297359	252999	249437	29.1386	28.7283	28.9335
rstA	145698268	3303	b1608	1680183	1680902	+	239	COG0745TK	P	multicopy supressor of yjeE, yeaZ or ygjD deletion lethality, predicted response regulator of two-component regulatory system with sensor protein RstB	6	6	1.45263e+06	1.44425e+06	2.24543e+06	2772264	258.612	319.289	288.951
cedA	145698276	1382501	b1731	1811445	1811687	-	80	-	P	cell division modulator	1	1	375149	442379
yebF	145698278	3346	b1847	1928058	1928414	-	118	-	P	secreted protein	2	2	1.12456e+06	1.0963e+06	1.19258e+06	1.09646e+06	137.353	126.283	131.818
yeeX	145698283	1382503	b2007	2077056	2077385	-	109	COG2926S	P	conserved protein, UPF0265 family	3	3	12711370	11032562	12692312	11380355	1461.81	1310.71	1386.26
rcsC	145698285	1382505	b2218	2315049	2317898	-	949	COG0642T	P	hybrid sensory kinase in two-component regulatory system with RcsB and YojN	5	5	560611	570846	483135	572219	55.644	65.9041	60.7741
arnB	145698288	3424	b2253	2363950	2365089	+	379	COG0399M	P	uridine 5'-(beta-1-threo-pentapyranosyl-4-ulose diphosphate) aminotransferase, PLP-dependent	10	10	132049	139407	316492	1.04493e+06	36.4513	120.347	78.3993
nuoN	145698289	3427	b2276	2388070	2389527	-	485	COG1007C	C	NADH:ubiquinone oxidoreductase, membrane subunit N	2	2	5.47711e+06	4.34785e+06	5.47547e+06	4369760	630.626	503.278	566.952
nuoG	145698290	3428	b2283	2395461	2398187	-	908	COG1034C	C	NADH:ubiquinone oxidoreductase, chain G	27	27	8497063	6.99212e+06	6458224	5.74108e+06	743.812	661.216	702.514
nuoC	145698291	3428	b2286	2400077	2401867	-	596	COG0649C	C	NADH:ubiquinone oxidoreductase, fused CD subunit	25	25	7.65821e+06	6893143	7.81353e+06	6.77664e+06	899.906	780.485	840.196
fadL	145698292	1382506	b2344	2459328	2460668	+	446	COG2067I	P	long-chain fatty acid outer membrane transporter	5	5	1.78333e+06	1.26527e+06	1.97457e+06	1.39743e+06	227.417	160.946	194.181
yffS	145698298	1382508	b2450	2562545	2563354	+	269	-	P	CPZ-55 prophage; predicted protein	3	3	1.23912e+06	544450	915721	962198	105.466	110.819	108.143
ypjD	145698303	3500	b2611	2745984	2746775	+	263	COG4137R	P	predicted inner membrane protein	1	1	1.77582e+06	1447933
yfjD	145698304	3500	b4461	2746796	2748082	+	428	COG4536P	P	inner membrane protein, UPF0053 family	1	1	591090	503210
ygiB	145698308	3586	b3037	3177766	3178437	+	223	COG5463S	P	conserved protein, UPF0441 family	4	4	1.63857e+06	1.89704e+06	1.84936e+06	1.98157e+06	212.997	228.223	220.61
patA	145698310	1382511	b3073	3217516	3218895	+	459	COG4992E	P	putrescine:2-oxoglutaric acid aminotransferase, PLP-dependent	3	3	1.02609e+06	1.19688e+06	1.43477e+06	1.62666e+06	165.247	187.347	176.297
ygjR	145698311	3596	b3087	3235333	3236319	+	328	COG0673R	P	predicted NAD(P)-binding dehydrogenase	2	2	465889	455317	1286187	1.2947e+06	148.134	149.115	148.624
garR	145698315	3603	b3125	3269889	3270773	-	294	COG2084I	P	tartronate semialdehyde reductase	2	2	89194.5	1344.86
PNP	145698316	1382512	b3164	3307055	3309190	-	711	COG1185J	C	polynucleotide phosphorylase/polyadenylase	29	29	36576912	43039216	31133838	31816050	3585.77	3664.34	3625.06
bisC	145698325	1382515	b3551	3712084	3714417	-	777	COG0243C	P	biotin sulfoxide reductase	4	4	864277	868219	1221476	1.25161e+06	140.681	144.152	142.416
wecD	145698332	3736	b3790	3972490	3973164	+	224	-	P	TDP-fucosamine acetyltransferase	1	1	224566	136137
yihA	145698334	1382519	b3865	4048156	4048788	-	210	COG0218R	P	GTP-binding protein required for normal cell division	8	8	4420637	2.85401e+06	4.06063e+06	3.70032e+06	467.675	426.176	446.926
argB	145698337	3767	b3959	4154036	4154812	+	258	COG0548E	P	acetylglutamate kinase	11	11	13137182	14058958	10725293	11336083	1235.26	1305.61	1270.44
fabR	145698338	3768	b3963	4159147	4159794	+	215	COG1309K	P	DNA-binding transcriptional repressor	3	3	316921	124477	348558	116573	40.1444	13.4261	26.7852
THRA	16127996	2996	b0002	337	2799	+	820	COG0527E	P	fused aspartokinase I and homoserine dehydrogenase I	38	38	65289312	63286608	54046976	51000652	6224.74	5873.89	6049.32
THRB	16127997	2996	b0003	2801	3733	+	310	COG0083E	P	homoserine kinase	7	7	20449772	25032078	19858866	24075634	2287.2	2772.86	2530.03
thrC	16127998	2996	b0004	3734	5020	+	428	COG0498E	P	threonine synthase	19	18	37324932	39857304	50349072	52554992	5798.84	6052.91	5925.88
yaaA	16128000	2997	b0006	5683	6459	-	258	COG3022S	P	Peroxide resistance protein, lowers intracellular iron	7	7	1.07206e+06	1.06901e+06	1.00032e+06	1.18157e+06	115.21	136.084	125.647
talB	16128002	2998	b0008	8238	9191	+	317	COG0176G	P	transaldolase B	21	20	59765688	56007160	63685308	61061180	7334.82	7032.59	7183.7
MOG	16128003	2998	b0009	9306	9893	+	195	COG0521H	P	molybdochelatase incorporating molybdenum into molybdopterin	1	1	143958	112578
dnaK	16128008	3000	b0014	12163	14079	+	638	COG0443O	C	chaperone Hsp70, co-chaperone with DnaJ	45	45	79795600	55898812	65617792	42788600	7557.39	4928.08	6242.73
DNAJ	16128009	3000	b0015	14168	15298	+	376	COG0484O	C	chaperone Hsp40, co-chaperone with DnaK	10	10	7839583	6883543	7.26846e+06	6.20511e+06	837.129	714.66	775.895
rpsT	16128017	1382532	b0023	20815	21078	-	87	COG0268J	P	30S ribosomal subunit protein S20	4	4	155795936	95212344	98535568	92233800	11348.6	10622.8	10985.7
RIBF	16128019	3004	b0025	21407	22348	+	313	COG0196H	P	bifunctional riboflavin kinase/FAD synthetase	3	3	1.11564e+06	1.16623e+06	1.11822e+06	1.15818e+06	128.788	133.39	131.089
ileS	16128020	3004	b0026	22391	25207	+	938	COG0060J	P	isoleucyl-tRNA synthetase	37	37	19567844	18490118	19155220	18121304	2206.16	2087.08	2146.62
fkpB	16128022	3005	b0028	25826	26275	+	149	COG1047O	P	FKBP-type peptidyl-prolyl cis-trans isomerase (rotamase)	1	1	861925	846497
ispH	16128023	3005	b0029	26277	27227	+	316	COG0761IM	P	4-hydroxy-3-methylbut-2-enyl diphosphate reductase, 4Fe-4S protein	8	8	3197761	3.04611e+06	4763996	4370490	548.683	503.362	526.022
dapB	16128025	1382533	b0031	28374	29195	+	273	COG0289E	P	dihydrodipicolinate reductase	9	9	16203449	19068934	9158964	11791014	1054.86	1358	1206.43
carA	16128026	3006	b0032	29651	30799	+	382	COG0505EF	C	carbamoyl phosphate synthetase small subunit, glutamine amidotransferase	16	16	31399520	34933704	17476006	19399164	2012.76	2234.26	2123.51
carB	16128027	3006	b0033	30817	34038	+	1073	COG0458EF	C	carbamoyl-phosphate synthase large subunit	47	47	45333736	43094500	45902324	42243768	5286.7	4865.33	5076.02
kefC	16128041	3011	b0047	47769	49631	+	620	COG0475P	P	potassium:proton antiporter	4	4	812269	898832	764144	881378	88.0086	101.511	94.7597
folA	16128042	1382534	b0048	49823	50302	+	159	COG0262H	P	dihydrofolate reductase	2	2	1.65139e+06	1.76353e+06	1.67467e+06	1.73718e+06	192.877	200.076	196.476
apaH	16128043	3012	b0049	50380	51222	-	280	COG0639T	P	diadenosine tetraphosphatase	2	2	386630	407992	229656	326845	26.4501	37.6436	32.0469
apaG	16128044	3012	b0050	51229	51606	-	125	COG2967P	P	protein associated with Co2+ and Mg2+ efflux	2	2	618426	684276	575201	650517	66.2475	74.9219	70.5847
rsmA	16128045	3012	b0051	51609	52430	-	273	COG0030J	P	16S rRNA dimethyladenosine transferase, SAM-dependent	7	7	2098357	1.53889e+06	1.87e+06	1.24399e+06	215.374	143.274	179.324
pdxA	16128046	3012	b0052	52427	53416	-	329	COG1995H	P	4-hydroxy-L-threonine phosphate dehydrogenase, NAD-dependent	2	2	197553	248249	125938	163973	14.5046	18.8853	16.6949
surA	16128047	3012	b0053	53416	54702	-	428	COG0760O	P	peptidyl-prolyl cis-trans isomerase (PPIase)	16	16	7.58576e+06	8017041	7367217	7.86884e+06	848.503	906.277	877.39
lptD	16128048	3012	b0054	54755	57109	-	784	COG1452M	P	LPS assembly OM complex LptDE, beta-barrel component	29	29	5159778	4869576	5160448	4846529	594.343	558.188	576.266
djlA	16128049	1382535	b0055	57364	58179	+	271	COG1076O	P	DnaJ-like protein, membrane anchored	5	5	982189	922263	1.34453e+06	669810	154.853	77.1439	115.998
rapA	16128053	3013	b0059	60358	63264	-	968	COG0553KL	P	RNA polymerase-associated helicase protein (ATPase and RNA polymerase recycling factor)	18	18	2148186	1.9079e+06	4796962	2.91247e+06	552.48	335.438	443.959
thiQ	16128060	3016	b0066	72229	72927	-	232	COG3840H	C	thiamin transporter subunit	3	3	322824	300954
thiB	16128062	3016	b0068	74497	75480	-	327	COG4143H	C	thiamin transporter subunit	10	10	4468757	5259719	3871003	4654592	445.834	536.082	490.958
leuD	16128065	3017	b0071	78848	79453	-	201	COG0066E	P	3-isopropylmalate dehydratase small subunit	9	9	11472018	12904201	11323563	12641239	1304.17	1455.93	1380.05
leuC	16128066	3017	b0072	79464	80864	-	466	COG0065E	P	3-isopropylmalate dehydratase large subunit	18	18	19358424	19883212	19082412	19303868	2197.78	2223.28	2210.53
leuA	16128068	3017	b0074	81958	83529	-	523	COG0119E	P	2-isopropylmalate synthase	27	26	35124428	31119848	26441600	21722800	3045.35	2501.88	2773.61
ilvH	16128071	3018	b0078	87357	87848	+	163	COG0440E	C	acetolactate synthase III, thiamin-dependent, small subunit	7	7	6053368	8.19132e+06	6302243	8.32136e+06	725.847	958.394	842.121
cra	16128073	1382540	b0080	88028	89032	+	334	COG1609K	P	DNA-binding transcriptional repressor-activator for carbon metabolism	6	6	1865932	1.73133e+06	1.87646e+06	1.73178e+06	216.117	199.454	207.786
mraZ	16128074	3019	b0081	89634	90092	+	152	COG2001S	P	RsmH methytransferase inhibitor	2	2	177833	132258	360646	333757	41.5366	38.4397	39.9882
rsmH	16128075	3019	b0082	90094	91035	+	313	COG0275M	P	16S rRNA m(4)C1402 methyltranserfase, SAM-dependent	4	4	3.3847e+06	2.96838e+06	3.29296e+06	2813860	379.26	324.08	351.67
ftsL	16128076	3019	b0083	91032	91397	+	121	COG3116D	P	membrane bound cell division protein at septum containing leucine zipper motif	3	3	572559	406889	1.00571e+06	877145	115.83	101.023	108.427
ftsI	16128077	3019	b0084	91413	93179	+	588	COG0768M	P	transpeptidase involved in septal peptidoglycan synthesis (penicillin-binding protein 3)	8	8	1.12882e+06	1.02421e+06	1.33529e+06	1.18642e+06	153.789	136.643	145.216
murE	16128078	3019	b0085	93166	94653	+	495	COG0769M	P	UDP-N-acetylmuramoyl-L-alanyl-D-glutamate:meso-diaminopimelate ligase	14	14	1.62442e+06	2.01489e+06	1.18851e+06	935032	136.884	107.69	122.287
murF	16128079	3019	b0086	94650	96008	+	452	COG0770M	P	UDP-N-acetylmuramoyl-tripeptide:D-alanyl-D-alanine ligase	4	4	2.02693e+06	2.0946e+06	1.38889e+06	1.3848e+06	159.962	159.492	159.727
mraY	16128080	3019	b0087	96002	97084	+	360	COG0472M	P	phospho-N-acetylmuramoyl-pentapeptide transferase	2	2	1.8922e+06	1.69079e+06	1853847	1.65211e+06	213.513	190.278	201.895
murD	16128081	3019	b0088	97087	98403	+	438	COG0771M	P	UDP-N-acetylmuramoyl-L-alanine:D-glutamate ligase	6	6	2.2244e+06	2.18809e+06	1.88718e+06	1.76472e+06	217.352	203.248	210.3
ftsW	16128082	3019	b0089	98403	99647	+	414	COG0772D	P	Lipid II flippase; integral membrane protein involved in stabilizing FstZ ring during cell division	2	2	870194	788870	838032	778809	96.5185	89.6976	93.1081
murG	16128083	3019	b0090	99644	100711	+	355	COG0707M	P	N-acetylglucosaminyl transferase	8	7	1853111	1.69475e+06	3813209	3071676	439.178	353.774	396.476
MURC	16128084	3019	b0091	100765	102240	+	491	COG0773M	P	UDP-N-acetylmuramate:L-alanine ligase	13	13	3.06671e+06	2.22627e+06	3.04242e+06	2235192	350.404	257.433	303.919
ddlB	16128085	3019	b0092	102233	103153	+	306	COG1181M	P	D-alanine:D-alanine ligase	7	7	2523550	2.3482e+06	2324408	2.21813e+06	267.709	255.469	261.589
ftsQ	16128086	3019	b0093	103155	103985	+	276	COG1589M	P	Divisome assembly protein, membrane anchored protein involved in growth of wall at septum	5	5	560699	533366	515187	498461	59.3355	57.4092	58.3723
ftsA	16128087	3019	b0094	103982	105244	+	420	COG0849D	P	ATP-binding cell division protein involved in recruitment of FtsK to Z ring	14	14	2.72927e+06	2356913	2.39979e+06	2.00298e+06	276.391	230.689	253.54
ftsZ	16128088	3019	b0095	105305	106456	+	383	COG0206D	P	GTP-binding tubulin-like cell division protein	23	23	19706640	17074938	23806016	19943880	2741.81	2296.99	2519.4
lpxC	16128089	3019	b0096	106557	107474	+	305	COG0774M	P	UDP-3-O-acyl N-acetylglucosamine deacetylase	3	3	223533	461804	3.71762e+06	2.82252e+06	428.169	325.078	376.623
secA	16128091	3020	b0098	108279	110984	+	901	COG0653U	P	preprotein translocase subunit, ATPase	38	37	7.77028e+06	7915707	5.82407e+06	5414279	670.774	623.578	647.176
zapD	16128095	3021	b0102	111856	112599	-	247	COG4582S	P	conserved protein	6	6	3455225	2.25863e+06	3018417	2.08265e+06	347.64	239.864	293.752
guac	16128097	1382542	b0104	113444	114487	+	347	COG0516F	P	GMP reductase	8	8	6889974	6505932	4804264	4.65842e+06	553.321	536.523	544.922
nadC	16128102	1382543	b0109	117752	118645	-	297	COG0157H	P	quinolinate phosphoribosyltransferase	9	9	1.79698e+06	2.09336e+06	1397459	1.40303e+06	160.949	161.59	161.27
ampD	16128103	3023	b0110	118733	119284	+	183	COG3023V	P	1,6-anhydro-N-acetylmuramyl-L-alanine amidase, Zn-dependent; murein amidase	1	1	244288	146943
ampE	16128104	3023	b0111	119281	120135	+	284	COG3725V	P	predicted inner membrane protein	2	2	89729.1	116950	691423	538020	79.6332	61.9653	70.7992
aroP	16128105	1382544	b0112	120178	121551	-	457	COG1113E	P	aromatic amino acid transporter	4	4	5.24368e+06	4.35134e+06	5.56086e+06	4.54739e+06	640.46	523.736	582.098
pdhR	16128106	1382545	b0113	122092	122856	+	254	COG2186K	P	DNA-binding transcriptional dual regulator	1	1	1.26355e+06	1.44897e+06
aceE	16128107	3024	b0114	123017	125680	+	887	COG2609C	C	pyruvate dehydrogenase, decarboxylase component E1, thiamin-binding	49	48	75894440	76598280	76122336	76378184	8767.22	8796.69	8781.96
aceF	16128108	3024	b0115	125695	127587	+	630	COG0508C	C	pyruvate dehydrogenase, dihydrolipoyltransacetylase component E2	30	29	46143652	46677680	34916504	36860460	4021.43	4245.32	4133.38
lpd	16128109	1382546	b0116	127912	129336	+	474	COG1249C	P	lipoamide dehydrogenase, E3 component is part of three enzyme complexes	17	16	52387024	52746628	29442570	32393090	3390.98	3730.8	3560.89
acnB	16128111	1382548	b0118	131615	134212	+	865	COG1049C	P	bifunctional aconitate hydratase 2/2-methylisocitrate dehydratase	39	38	48586760	52611896	51030992	52435320	5877.38	6039.12	5958.25
speD	16128113	3025	b0120	134788	135582	-	264	COG1586E	P	S-adenosylmethionine decarboxylase	8	8	2.50077e+06	3.20178e+06	2.68909e+06	3.32764e+06	309.71	383.254	346.482
speE	16128114	3025	b0121	135598	136464	-	288	COG0421E	P	spermidine synthase (putrescine aminopropyltransferase)	5	5	5759644	6850216	5816602	6.81976e+06	669.914	785.451	727.682
cueO	16128116	1382549	b0123	137083	138633	+	516	COG2132Q	P	multicopper oxidase (laccase)	3	4	1.14759e+06	1.33888e+06	1.28905e+06	1.568e+06	148.463	180.591	164.527
gcd	16128117	1382550	b0124	138835	141225	-	796	COG4993G	P	glucose dehydrogenase	21	20	7.45279e+06	7.35433e+06	5.97974e+06	5.88957e+06	688.704	678.318	683.511
can	16128119	1382551	b0126	142008	142670	-	220	COG0288P	P	carbonic anhydrase	9	9	20659194	18851610	14599118	13360159	1681.42	1538.73	1610.07
yadG	16128120	3026	b0127	142779	143705	+	308	COG1131V	C	predicted transporter subunit: ATP-binding component of ABC superfamily	7	7	1.90491e+06	2.00441e+06	1.87088e+06	1.81942e+06	215.475	209.547	212.511
panD	16128124	1382554	b0131	146314	146694	-	126	COG0853H	P	aspartate 1-decarboxylase	1	1	5130475	7.238e+06
panC	16128126	3027	b0133	147944	148795	-	283	COG0414H	P	pantothenate synthetase	10	10	10803270	10094721	9241053	8457344	1064.32	974.056	1019.19
panB	16128127	3027	b0134	148807	149601	-	264	COG0413H	P	3-methyl-2-oxobutanoate hydroxymethyltransferase	4	4	7.09251e+06	7418838	7.11961e+06	7.04338e+06	819.986	811.206	815.596
dksA	16128138	3029	b0145	160149	160604	-	151	COG1734T	P	DNA-binding transcriptional regulator of rRNA transcription, DnaK suppressor protein	4	4	5.79066e+06	6.57798e+06	6.86069e+06	7.34538e+06	790.165	845.988	818.077
sfsA	16128139	3030	b0146	160782	161486	-	234	COG1489R	P	predicted DNA-binding transcriptional regulator	1	1	75974.7	152264
mrcB	16128142	1382557	b0149	164730	167264	+	844	COG0744M	P	fused glycosyl transferase and transpeptidase	13	12	1.5561e+06	1.53726e+06	2.09885e+06	2101930	241.73	242.085	241.908
fhuA	16128143	3031	b0150	167484	169727	+	747	COG1629P	P	ferrichrome outer membrane transporter	14	14	5735036	5.21585e+06	6.74933e+06	6.18512e+06	777.34	712.357	744.849
fhuC	16128144	3031	b0151	169778	170575	+	265	COG1120PH	P	iron-hydroxamate transporter subunit	5	5	882979	790598	402338	443708	46.3383	51.1031	48.7207
hemL	16128147	1382558	b0154	173602	174882	-	426	COG0001H	P	glutamate-1-semialdehyde aminotransferase (aminomutase)	11	11	11483806	10631318	8979698	8.25266e+06	1034.22	950.482	992.35
CLCA	16128148	3032	b0155	175107	176528	+	473	COG0038P	P	chloride channel, voltage-gated	2	2	189308	4.10639e+06	233745	4.15772e+06	26.9211	478.857	252.889
erpA	16128149	3032	b0156	176610	176954	+	114	COG0316S	P	iron-sulfur cluster insertion protein	2	2	6117462	6037007	6.13807e+06	5.73738e+06	706.939	660.791	683.865
btuF	16128151	3033	b0158	177662	178462	-	266	COG0614P	P	vitamin B12 transporter subunit: periplasmic-binding component of ABC superfamily	2	2	619429	271453
mtn	16128152	3033	b0159	178455	179153	-	232	COG0775F	P	5'-methylthioadenosine/S-adenosylhomocysteine nucleosidase	6	6	6952371	6.64843e+06	6979481	6627487	803.846	763.306	783.576
dgt	16128153	1382559	b0160	179237	180754	+	505	COG0232F	P	deoxyguanosine triphosphate triphosphohydrolase	4	4	327869	243498	309354	324389	35.6291	37.3608	36.495
degP	16128154	1382560	b0161	180884	182308	+	474	COG0265O	P	serine endoprotease (protease Do), membrane-associated	17	17	8725425	8.38756e+06	6127628	5973514	705.736	687.986	696.861
yaeH	16128156	1382561	b0163	183709	184095	-	128	-	P	conserved protein, UPF0325 family	6	6	9652938	9463575	9604844	9552657	1106.22	1100.21	1103.21
dapD	16128159	3034	b0166	185123	185947	-	274	COG2171E	P	2,3,4,5-tetrahydropyridine-2-carboxylate N-succinyltransferase	13	13	46344300	47162364	47131664	48103708	5428.29	5540.24	5484.26
glnD	16128160	3034	b0167	185978	188650	-	890	COG2844O	P	uridylyltransferase	13	14	1.07578e+06	946105	1.61276e+06	1.25875e+06	185.746	144.974	165.36
map	16128161	3034	b0168	188712	189506	-	264	COG0024J	P	methionine aminopeptidase	9	9	6627040	8064434	7.09438e+06	8586140	817.08	988.89	902.985
rpsB	16128162	1382562	b0169	189874	190599	+	241	COG0052J	P	30S ribosomal subunit protein S2	12	12	83443368	90587584	76399504	82070768	8799.15	9452.32	9125.73
tsf	16128163	3035	b0170	190857	191708	+	283	COG0264J	P	protein chain elongation factor EF-Ts	19	19	48000864	51964168	49888764	53467116	5745.83	6157.96	5951.89
pyrH	16128164	3035	b0171	191855	192580	+	241	COG0528F	P	uridylate kinase	7	7	5.40542e+06	8451055	8943742	10519519	1030.08	1211.56	1120.82
frr	16128165	3036	b0172	192872	193429	+	185	COG0233J	P	ribosome recycling factor	6	6	10628270	10830399	7.4444e+06	10092109	857.392	1162.34	1009.86
dxr	16128166	3036	b0173	193521	194717	+	398	COG0743I	P	1-deoxy-D-xylulose 5-phosphate reductoisomerase	2	2	256602	452929	326410	432407	37.5936	49.8015	43.6975
rseP	16128169	3037	b0176	196546	197898	+	450	COG0750M	C	inner membrane zinc RIP metalloprotease; RpoE activator, by degrading RseA	4	4	1.13364e+06	917959	1.03874e+06	873972	119.635	100.658	110.146
bamA	16128170	3037	b0177	197928	200360	+	810	COG4775M	C	outer membrane protein assembly factor, forms pores; required for OM biogenesis; in BamABCDE OM protein complex	34	33	18265462	17533298	10721882	9485215	1234.87	1092.44	1163.65
skp	16128171	3038	b0178	200482	200967	+	161	COG2825M	P	periplasmic chaperone	6	6	31693208	32237180	30805348	28398702	3547.94	3270.76	3409.35
lpxD	16128172	3038	b0179	200971	201996	+	341	COG1044M	P	UDP-3-O-(3-hydroxymyristoyl)-glucosamine N-acyltransferase	3	3	2.72227e+06	2.60281e+06	6081388	6117360	700.411	704.554	702.482
fabZ	16128173	3038	b0180	202101	202556	+	151	COG0764I	P	(3R)-hydroxymyristol acyl carrier protein dehydratase	5	5	31832268	39342040	22464438	26611706	2587.29	3064.94	2826.12
lpxA	16128174	3038	b0181	202560	203348	+	262	COG1043M	P	UDP-N-acetylglucosamine acetyltransferase	3	3	3.06458e+06	3184879	2.34368e+06	2.35209e+06	269.928	270.897	270.413
lpxB	16128175	3038	b0182	203348	204496	+	382	COG0763M	P	tetraacyldisaccharide-1-P synthase	3	3	486317	433816	370000	344476	42.6139	39.6742	41.1441
rnhB	16128176	3038	b0183	204493	205089	+	198	COG0164L	P	ribonuclease HII, degrades RNA of DNA-RNA hybrids	2	2	371489	500908	301167	383442	34.6862	44.1621	39.4242
dnaE	16128177	3038	b0184	205126	208608	+	1160	COG0587L	P	DNA polymerase III alpha subunit	7	7	424104	399987	601052	634707	69.2249	73.101	71.163
accA	16128178	3038	b0185	208621	209580	+	319	COG0825I	P	acetyl-CoA carboxylase, carboxytransferase, alpha subunit	13	13	11284094	12293479	11453338	11985216	1319.11	1380.37	1349.74
ldcC	16128179	3039	b0186	209679	211820	+	713	COG1982E	P	lysine decarboxylase 2, constitutive	2	2	169615	217928
tilS	16128181	3039	b0188	212331	213629	+	432	COG0037D	P	tRNA(Ile)-lysidine synthetase	4	4	411065	301487	927338	715397	106.804	82.3943	94.5992
yaeQ	16128183	3041	b0190	214291	214836	+	181	COG4681S	P	conserved protein	1	1	1.03425e+06	1.11266e+06
nlpE	16128185	3041	b0192	215269	215979	+	236	COG3015MP	P	lipoprotein involved with copper homeostasis and adhesion	3	3	843534	795130	860381	826345	99.0925	95.1725	97.1325
pros	16128187	1382563	b0194	217057	218775	-	572	COG0442J	P	prolyl-tRNA synthetase	28	28	14954373	14766189	14834580	14185057	1708.54	1633.73	1671.14
tsaA	16128188	3042	b0195	218887	219594	-	235	COG1720S	P	conserved protein, UPF0066 family	1	1	208955	302107
rcsF	16128189	3042	b0196	219591	219995	-	134	-	P	predicted outer membrane protein, signal	3	3	2.55768e+06	2093534	1.74831e+06	1230002	201.358	141.663	171.51
metQ	16128190	3043	b0197	220113	220928	-	271	COG1464P	C	DL-methionine transporter subunit	16	16	41136232	24308918	44564944	27319120	5132.67	3146.42	4139.54
metI	16128191	3043	b0198	220968	221621	-	217	COG2011P	C	DL-methionine transporter subunit	2	2	5152603	5.99702e+06	4.06382e+06	5.02564e+06	468.042	578.817	523.43
metN	16128192	3043	b0199	221614	222645	-	343	COG1135P	C	DL-methionine transporter subunit	14	14	8961033	6349531	8499396	5.86058e+06	978.899	674.979	826.939
gmhB	16128193	1382564	b0200	222833	223408	+	191	COG0241E	P	D,D-heptose 1,7-bisphosphate phosphatase	2	2	658391	291507	3.24953e+06	4.88657e+06	374.258	562.8	468.529
dkgB	16128194	1382565	b0207	229167	229970	+	267	COG0656R	P	2,5-diketo-D-gluconate reductase B	2	2	427340	481362	856054	675048	98.5941	77.7471	88.1706
yafC	16128195	1382566	b0208	229967	230881	-	304	COG0583K	P	predicted DNA-binding transcriptional regulator	2	2	203931	190934	243577	211460	28.0534	24.3544	26.2039
yafD	16128196	3044	b0209	231122	231922	+	266	COG3021S	P	conserved protein	3	3	526217	449820	582024	510846	67.0333	58.8356	62.9345
gloB	16128199	3045	b0212	234027	234782	-	251	COG0491R	P	hydroxyacylglutathione hydrolase	4	4	645448	791451	1.08333e+06	1.16963e+06	124.77	134.709	129.74
rnhA	16128201	1382567	b0214	235535	236002	-	155	COG0328L	P	ribonuclease HI, degrades RNA of DNA-RNA hybrids	3	3	899556	654666	858633	674237	98.8912	77.6538	88.2725
yafV	16128205	1382570	b0219	239419	240189	-	256	COG0388R	P	predicted C-N hydrolase family amidase, NAD(P)-binding	5	4	584655	570875	400167	392792	46.0884	45.239	45.6637
ivy	16128206	1382571	b0220	240343	240816	+	157	-	P	inhibitor of c-type lysozyme, periplasmic	4	4	2.02625e+06	1.88239e+06	1.62793e+06	1.57388e+06	187.493	181.268	184.38
gmhA	16128208	1382572	b0222	243543	244121	+	192	COG0279G	P	D-sedoheptulose 7-phosphate isomerase	11	11	22897990	22312904	19915910	19461852	2293.77	2241.48	2267.62
yafJ	16128209	1382573	b0223	244327	245094	+	255	COG0121R	P	predicted amidotransfease	3	3	454322	794527	341502	294997	39.3318	33.9756	36.6537
yafK	16128210	1382574	b0224	245065	245805	-	246	COG3034S	P	conserved protein	1	1	644876	635229
PEPD	16128223	1382577	b0237	254259	255716	-	485	COG2195E	P	aminoacyl-histidine dipeptidase (peptidase D)	19	19	20070334	17356558	15521134	13468902	1787.61	1551.25	1669.43
GPT	16128224	1382578	b0238	255977	256435	+	152	COG0503F	P	guanine-hypoxanthine phosphoribosyltransferase	6	6	9828059	10268529	2.15673e+06	2401046	248.397	276.535	262.466
FRSA	16128225	3048	b0239	256527	257771	+	414	COG0412Q	P	fermentation-respiration switch protein; PTS Enzyme IIA(Glc)-binding protein; pNP-butyrate esterase activity	12	11	2.49169e+06	2.41862e+06	2392567	2.13511e+06	275.559	245.907	260.733
proB	16128228	3049	b0242	259612	260715	+	367	COG0263E	P	gamma-glutamate kinase	13	13	4.21581e+06	4239407	4275633	4099218	492.437	472.118	482.278
proA	16128229	3049	b0243	260727	261980	+	417	COG0014E	P	gamma-glutamylphosphate reductase	15	15	6579799	5642541	3.47425e+06	2847146	400.139	327.914	364.026
mmuM	16128246	3053	b0261	275939	276871	+	310	COG2040E	P	CP4-6 prophage; S-methylmethionine:homocysteine methyltransferase	1	1	630484	586881
yagI	16128257	1382585	b0272	287628	288386	-	252	COG1414K	P	CP4-6 prophage; predicted DNA-binding transcriptional regulator	1	1	584041	606262
argF	16128258	1382586	b0273	288525	289529	-	334	COG0078E	P	ornithine carbamoyltransferase 2, chain F; CP4-6 prophage	2	2	20134564	25194640	14507117	19491424	1670.83	2244.88	1957.85
yagU	16128272	1382590	b0287	302215	302829	+	204	COG3477S	P	inner membrane protein, DUF1440 family	5	5	17195766	11883129	16236175	11147207	1869.97	1283.86	1576.91
ykgM	16128281	3061	b0296	311738	312001	-	87	COG0254J	P	rpmE (L31) paralog	5	5	12145760	15238181	20979940	22990622	2416.32	2647.89	2532.11
betA	16128296	3065	b0311	324801	326471	-	556	COG2303E	P	choline dehydrogenase, a flavoprotein	2	2	1.1132e+06	1.14985e+06	797449	776715	91.8444	89.4565	90.6504
betB	16128297	3065	b0312	326485	327957	-	490	COG1012C	P	betaine aldehyde dehydrogenase, NAD-dependent	7	7	1.05213e+06	1055412	1.40116e+06	1.08393e+06	161.375	124.84	143.107
betT	16128299	1382595	b0314	328687	330720	+	677	COG1292M	P	choline transporter of high affinity	2	2	378059	283141	374658	279316	43.1504	32.1697	37.66
yahJ	16128309	3067	b0324	340349	341731	+	460	COG0402FR	P	predicted deaminase with metallo-dependent hydrolase domain	4	4	159634	252206	1855425	1.72777e+06	213.695	198.992	206.343
yahK	16128310	1382599	b0325	342108	343157	+	349	COG1064R	P	predicted oxidoreductase, Zn-dependent and NAD(P)-binding	10	10	5.60835e+06	4260097	4668221	3.35147e+06	537.652	385.998	461.825
yahO	16128314	1382602	b0329	345708	345983	+	91	-	P	periplasmic protein, function unknown, YhcN family	2	2	1.02515e+06	463151	747576	727401	86.1004	83.7768	84.9386
codB	16128321	3069	b0336	354146	355405	+	419	COG1457F	P	cytosine transporter	2	2	1.21924e+06	897196	1.98559e+06	1.75301e+06	228.687	201.899	215.293
codA	16128322	3069	b0337	355395	356678	+	427	COG0402FR	P	cytosine/isoguanine deaminase	11	11	4.61848e+06	4.73655e+06	7.57318e+06	8438098	872.225	971.839	922.032
frmB	16128340	3074	b0355	376759	377592	-	277	COG0627R	P	S-formylglutathione hydrolase	2	2	299901	337760	347190	415472	39.9869	47.851	43.9189
frmA	16128341	3074	b0356	377686	378795	-	369	COG1062C	P	alcohol dehydrogenase class III/glutathione-dependent formaldehyde dehydrogenase	5	5	2.03294e+06	1.97565e+06	3.51367e+06	3.04984e+06	404.679	351.259	377.969
AMPH	16128361	1382607	b0376	394354	395511	-	385	COG1680V	P	penicillin-binding protein	2	2	525408	654698	390077	406702	44.9263	46.841	45.8837
sbmA	16128362	3078	b0377	395863	397083	+	406	COG1133I	P	microcin B17 transporter	1	1	463808	417928
ddlA	16128366	1382609	b0381	399053	400147	-	364	COG1181M	P	D-alanine-D-alanine ligase A	8	8	1.70361e+06	1.50456e+06	1.83435e+06	1.66009e+06	211.267	191.198	201.232
iraP	16128367	1382610	b0382	400610	400870	+	86	-	P	anti-RssB factor, RpoS stabilzer during Pi starvation; anti-adapter protein	1	1	256419	151111
PROC	16128371	1382612	b0386	404059	404868	-	269	COG0345E	P	pyrroline-5-carboxylate reductase, NAD(P)-binding	4	4	2.84983e+06	2.93154e+06	2.25724e+06	2.23525e+06	259.972	257.44	258.706
aroL	16128373	3079	b0388	405629	406153	+	174	COG0703E	P	shikimate kinase II	4	4	1.68002e+06	1.0548e+06	1097753	1.23647e+06	126.431	142.408	134.42
yaiE	16128376	3080	b0391	407401	407685	+	94	COG3123S	P	conserved protein, UPF0345 family	2	2	4.68001e+06	5470570	4.73284e+06	3.54463e+06	545.094	408.245	476.67
rdgC	16128378	1382613	b0393	408332	409243	-	303	COG2974L	P	nucleoid-associated ssDNA and dsDNA binding protein; competitive inhibitor of RecA function	7	7	4.64124e+06	4.60295e+06	3822411	3699458	440.238	426.077	433.157
sbcC	16128382	3081	b0397	411831	414977	-	1048	COG0419L	C	exonuclease, dsDNA, ATP-dependent	2	1	101171	134602
sbcD	16128383	3081	b0398	414974	416176	-	400	COG0420L	C	exonuclease, dsDNA, ATP-dependent	1	1	354650	299317
proY	16128387	3083	b0402	420210	421583	+	457	COG1113E	P	proline-specific permease	1	1	93242.8	65654.8
acpH	16128389	1382614	b0404	423561	424142	-	193	COG3124S	P	conserved protein	1	1	263839	443778
queA	16128390	3084	b0405	424235	425305	+	356	COG0809J	P	S-adenosylmethionine:tRNA ribosyltransferase-isomerase	7	7	975749	957918	1.3859e+06	1.39388e+06	159.618	160.537	160.078
tgt	16128391	3084	b0406	425361	426488	+	375	COG0343J	P	tRNA-guanine transglycosylase	8	8	2.93954e+06	1.70637e+06	2.87733e+06	1.9814e+06	331.39	228.203	279.797
yajC	16128392	3084	b0407	426511	426843	+	110	COG1862U	P	SecYEG protein translocase auxillary subunit	4	4	29173402	35138412	29636556	36173400	3413.33	4166.19	3789.76
secD	16128393	3084	b0408	426871	428718	+	615	COG0342U	P	SecYEG protein translocase auxillary subunit	22	22	7.87363e+06	7.22522e+06	9246423	8.3127e+06	1064.94	957.397	1011.17
secF	16128394	3084	b0409	428729	429700	+	323	COG0341U	P	SecYEG protein translocase auxillary subunit	4	4	1.31403e+06	1.42348e+06	1.7007e+06	1532134	195.874	176.46	186.167
yajD	16128395	1382615	b0410	429829	430176	+	115	-	P	conserved protein, HNH family	1	1		64603.9
tsx	16128396	1382616	b0411	430353	431237	-	294	COG3248M	P	nucleoside channel, receptor of phage T6 and colicin K	5	5	4745343	4.40853e+06	5198106	4832382	598.68	556.559	577.62
nrdR	16128398	3085	b0413	432226	432675	+	149	COG1327K	P	conserved protein	3	3	1.31014e+06	1.42347e+06	2.7247e+06	3.16271e+06	313.812	364.258	339.035
ribD	16128399	3085	b0414	432679	433782	+	367	COG0117H	P	fused diaminohydroxyphosphoribosylaminopyrimidine deaminase and 5-amino-6-(5-phosphoribosylamino) uracil reductase	10	10	1848214	1.90517e+06	1.69004e+06	1.82086e+06	194.646	209.714	202.18
ribE	16128400	3085	b0415	433871	434341	+	156	COG0054H	P	riboflavin synthase beta chain	7	7	12144896	14270049	12239090	14345574	1409.61	1652.22	1530.92
nusB	16128401	3085	b0416	434361	434780	+	139	COG0781K	P	transcription antitermination protein	5	5	7.37274e+06	8454926	5.62694e+06	5872360	648.07	676.336	662.203
thiL	16128402	3086	b0417	434858	435835	+	325	COG0611H	P	thiamin-monophosphate kinase	3	3	764811	754350	1.14366e+06	1.16272e+06	131.719	133.914	132.817
dxs	16128405	3087	b0420	437539	439401	-	620	COG1154HI	P	1-deoxyxylulose-5-phosphate synthase, thiamine-requiring, FAD-requiring	9	9	2.4358e+06	2684016	2591015	3.44248e+06	298.414	396.481	347.448
ispA	16128406	3087	b0421	439426	440325	-	299	COG0142H	P	geranyltranstransferase	2	2	39459.5	46989.8	2.92346e+06	2.39986e+06	336.703	276.398	306.55
xseB	16128407	3087	b0422	440325	440567	-	80	COG1722L	P	exonuclease VII small subunit	4	4	1222896	1.21474e+06	1.23346e+06	1.18985e+06	142.061	137.038	139.549
thiI	16128408	1382617	b0423	440773	442221	+	482	COG0301H	P	tRNA s(4)U8 sulfurtransferase	12	13	3.13439e+06	2746584	2.35573e+06	1.97919e+06	271.316	227.948	249.632
panE	16128410	3088	b0425	442828	443739	-	303	COG1893H	P	2-dehydropantoate reductase, NADPH-specific	3	3	588459	543972	185304	184562	21.342	21.2566	21.2993
cyoE	16128413	3089	b0428	446039	446929	-	296	COG0109O	C	protoheme IX farnesyltransferase	1	1	283060
cyoB	16128416	3089	b0431	447874	449865	-	663	COG0843C	C	cytochrome o ubiquinol oxidase subunit I	7	6	20689430	17829648	13692389	11717827	1576.99	1349.58	1463.28
cyoA	16128417	3089	b0432	449887	450834	-	315	COG1622C	C	cytochrome o ubiquinol oxidase subunit II	8	8	11661854	13861530	7907405	10123549	910.718	1165.96	1038.34
tig	16128421	1382618	b0436	454357	455655	+	432	COG0544O	P	peptidyl-prolyl cis/trans isomerase (trigger factor)	27	27	79287128	75741280	84387584	81997216	9719.16	9443.85	9581.5
CLPP	16128422	3091	b0437	455901	456524	+	207	COG0740OU	C	proteolytic subunit of ClpA-ClpP and ClpX-ClpP ATP-dependent serine proteases	4	4	12601451	13444089	7828145	8048319	901.589	926.948	914.268
CLPX	16128423	3091	b0438	456650	457924	+	424	COG1219O	C	ATPase and specificity subunit of ClpX-ClpP ATP-dependent serine protease	17	17	18751954	17755830	18197672	17169922	2095.88	1977.51	2036.69
lon	16128424	1382619	b0439	458112	460466	+	784	COG0466O	P	DNA-binding ATP-dependent protease La	30	30	16228251	13821160	12562064	11083865	1446.81	1276.56	1361.68
hupB	16128425	1382620	b0440	460675	460947	+	90	COG0776L	C	HU, DNA-binding transcriptional regulator, beta subunit	4	4	44679260	39112700	37327996	31596962	4299.17	3639.11	3969.14
PPID	16128426	1382621	b0441	461139	463010	+	623	COG0760O	P	periplasmic folding chaperone, has an inactive PPIase domain	24	24	12608550	10655934	9055046	8436817	1042.9	971.692	1007.29
queC	16128429	3092	b0444	464076	464771	-	231	COG0603R	P	7-cyano-7-deazaguanine (preQ0) synthase; queuosine biosynthesis	4	4	1.97516e+06	1.60544e+06	1.89037e+06	1.82391e+06	217.72	210.065	213.892
mdlA	16128433	3093	b0448	468095	469867	+	590	COG1132V	P	fused predicted multidrug transporter subunits of ABC superfamily: ATP-binding components	2	2	242693	269491	59795.6	61944.3	6.88683	7.1343	7.01056
glnK	16128435	3094	b0450	471822	472160	+	112	COG0347E	P	nitrogen assimilation regulatory protein for GlnL, GlnE, and AmtB	2	2	1.59103e+06	1.59017e+06	1.58696e+06	1.5856e+06	182.774	182.618	182.696
amtB	16128436	3094	b0451	472190	473476	+	428	COG0004P	P	ammonium transporter	1	1	364428	287151
tesB	16128437	1382624	b0452	473525	474385	-	286	COG1946I	P	acyl-CoA thioesterase II	3	3	1.09236e+06	767193	977016	1006144	112.526	115.88	114.203
hha	16128444	3095	b0460	479314	479532	-	72	-	P	modulator of gene expression, with H-NS	2	2	925657	1.23243e+06	610272	951248	70.2867	109.558	89.9223
acrB	16128446	3096	b0462	480478	483627	-	1049	COG0841V	C	multidrug efflux system protein	26	26	8837829	7134421	8554654	6936279	985.264	798.871	892.067
acrA	16128447	3096	b0463	483650	484843	-	397	COG0845M	C	multidrug efflux system	16	16	13222485	13086437	13161685	13144762	1515.87	1513.92	1514.89
acrR	16128448	1382628	b0464	484985	485632	+	215	COG1309K	P	DNA-binding transcriptional repressor	1	1	128433	387705
mscK	16128449	1382629	b0465	485760	489122	+	1120	COG3264M	P	fused conserved protein	14	14	1.46647e+06	1.16527e+06	3.14969e+06	2.89894e+06	362.758	333.879	348.319
priC	16128451	3097	b0467	489509	490036	-	175	COG3923L	P	primosomal replication protein N''	1	1	223514	211140
apt	16128453	3098	b0469	490636	491187	+	183	COG0503F	P	adenine phosphoribosyltransferase	4	4	526422	582019	3.32451e+06	4.05266e+06	382.893	466.757	424.825
dnaX	16128454	3098	b0470	491316	493247	+	643	COG2812L	P	DNA polymerase III/DNA elongation factor III, tau and gamma subunits	7	7	1.95532e+06	1.91637e+06	1972383	1.89296e+06	227.165	218.017	222.591
ybaB	16128455	3098	b0471	493300	493629	+	109	COG0718S	P	conserved protein	3	3	4.03661e+06	3343481	3.70548e+06	2982004	426.77	343.446	385.108
recR	16128456	3098	b0472	493629	494234	+	201	COG0353L	P	gap repair protein	1	1	264270	249357
htpG	16128457	1382631	b0473	494344	496218	+	624	COG0326O	P	protein refolding molecular co-chaperone Hsp90, Hsp70-dependent; heat-shock protein; ATPase	27	27	16549515	12251712	16415853	12040119	1890.66	1386.69	1638.68
ADK	16128458	1382632	b0474	496399	497043	+	214	COG0563F	P	adenylate kinase	12	12	34915300	40285828	24568762	29129340	2829.65	3354.91	3092.28
gsk	16128461	1382635	b0477	499349	500653	+	434	COG0524G	P	inosine/guanosine kinase	10	10	1.03478e+06	904357	1498623	1.30595e+06	172.601	150.41	161.505
ybaL	16128462	1382636	b0478	500786	502462	-	558	COG4651P	P	predicted transporter with NAD(P)-binding Rossmann-fold domain	6	5	1.05125e+06	1.05336e+06	1.63261e+06	1.56855e+06	188.033	180.654	184.343
fsr	16128463	1382637	b0479	502700	503920	-	406	COG2223P	P	predicted fosmidomycin efflux system	1	1	1199798	971067
ushA	16128464	1382638	b0480	504138	505790	+	550	COG0737F	P	bifunctional UDP-sugar hydrolase/5'-nucleotidase	11	11	3.52186e+06	2591622	3312363	2907335	381.494	334.846	358.17
ybaK	16128465	1382639	b0481	505827	506306	-	159	COG2606S	P	conserved protein	5	5	1.59656e+06	1.24318e+06	2.60871e+06	2.44024e+06	300.453	281.049	290.751
ybaP	16128466	1382640	b0482	506510	507304	-	264	COG3735S	P	GumN family protein	1		288558	273673
COPA	16128468	1382641	b0484	508099	510603	-	834	COG2217P	P	copper transporter	10	10	532856	792353	1.25753e+06	704358	144.833	81.1229	112.978
cueR	16128471	1382642	b0487	513217	513624	+	135	COG0789K	P	DNA-binding transcriptional activator of copper-responsive regulon genes	2	2	281688	302975	272923	332134	31.4333	38.2529	34.8431
qmcA	16128473	3100	b0489	514080	514997	-	305	COG0330O	P	multicopy suppressor of ftsH htpX double mutant; membrane-anchored predicted protease with C-terminal cytoplasmic PHB domain	4	4	437538	400488	949216	922852	109.324	106.287	107.806
fetA	16128474	3101	b0490	515143	515820	+	225	COG4619R	P	predicted transporter subunit: ATP-binding component of ABC superfamily	2	2	167504	89535	310924	256610	35.8099	29.5545	32.6822
ybbO	16128477	3102	b0493	517564	518373	-	269	COG0300R	P	predicted oxidoreductase with NAD(P)-binding Rossmann-fold domain	3	3	518307	502891	1.05697e+06	1.01937e+06	121.734	117.404	119.569
tesA	16128478	3102	b0494	518363	518989	-	208	COG2755E	P	multifunctional acyl-CoA thioesterase I and protease I and lysophospholipase L1	3	3	1393721	1.35937e+06	1.50386e+06	1.49928e+06	173.204	172.676	172.94
ybbP	16128480	3103	b0496	519640	522054	+	804	COG3127Q	C	predicted ABC transporter permease	1	2	130454	128687	91849.3	71206.3	10.5785	8.20103	9.38979
allR	16128490	3105	b0506	532235	533050	+	271	COG1414K	P	DNA-binding transcriptional repressor for all (allantoin) and gcl (glyoxylate) operons; glyoxylate-induced	7	7	2.70191e+06	3.20288e+06	2088531	2.48924e+06	240.542	286.693	263.617
allE	16128499	3108	b0515	542485	543270	-	261	COG3257R	P	conserved protein	2	2	322104	373293	375421	514272	43.2383	59.2301	51.2342
purK	16128506	3110	b0522	550750	551817	-	355	COG0026F	P	N5-carboxyaminoimidazole ribonucleotide synthase	6	6	6.30849e+06	6845550	5.00021e+06	5.24401e+06	575.888	603.967	589.928
purE	16128507	3110	b0523	551814	552323	-	169	COG0041F	P	N5-carboxyaminoimidazole ribonucleotide mutase	4	4	4.02984e+06	5369349	2.20057e+06	2.8704e+06	253.446	330.592	292.019
PPIB	16128509	3110	b0525	553166	553660	-	164	COG0652O	P	peptidyl-prolyl cis-trans isomerase B (rotamase B)	8	8	11020024	11429950	7222721	7746273	831.861	892.16	862.011
cysS	16128510	1382647	b0526	553834	555219	+	461	COG0215J	P	cysteinyl-tRNA synthetase	20	20	7.42954e+06	7.18448e+06	5.61592e+06	5319346	646.801	612.644	629.723
folD	16128513	3111	b0529	556098	556964	-	288	COG0190H	P	bifunctional 5,10-methylene-tetrahydrofolate dehydrogenase/ 5,10-methylene-tetrahydrofolate cyclohydrolase	7	7	7943060	7.44539e+06	8.28991e+06	7.45406e+06	954.772	858.505	906.639
bord	16128540	1382655	b0557	577823	578116	-	97	-	P	DLP12 prophage; predicted lipoprotein	1	1	204889	152495
ompT	16128548	1382659	b0565	583903	584856	-	317	COG4571M	P	DLP12 prophage; outer membrane protease VII (outer membrane protein 3b)	19	19	107463688	85067504	91047720	70764496	10486.2	8150.15	9318.18
cusS	16128553	3118	b0570	592551	593993	-	480	COG0642T	C	sensory histidine kinase in two-component regulatory system with CusR, senses copper ions	1	1	102954	57484.8
cusR	16128554	3118	b0571	593983	594666	-	227	COG0745TK	C	DNA-binding response regulator in two-component regulatory system with CusS	2	2	240413	165042	161229	115847	18.5692	13.3425	15.9558
pheP	16128559	3119	b0576	601182	602558	+	458	COG1113E	C	phenylalanine transporter	1	1	84767.1	70431.4
ybdG	16128560	1382662	b0577	602639	603886	-	415	COG0668M	P	mechanosensitive channel protein, miniconductance	3	3	323631	336310	1215145	1.09739e+06	139.952	126.39	133.171
nfsB	16128561	1382663	b0578	603994	604647	-	217	COG0778C	P	dihydropteridine reductase, NAD(P)H-dependent, oxygen-insensitive	11	11	12466230	13632239	10272632	9296682	1183.13	1070.73	1126.93
fepA	16128567	1382665	b0584	609477	611717	-	746	COG4771P	P	iron-enterobactin outer membrane transporter	32	32	46284032	50166072	34509584	36962240	3974.57	4257.05	4115.81
entF	16128569	3121	b0586	613380	617261	+	1293	COG1020Q	P	enterobactin synthase multienzyme complex component, ATP-dependent	40	39	16787356	13386524	11297290	8950464	1301.14	1030.85	1166
fepC	16128571	3122	b0588	618607	619422	-	271	COG1120PH	C	iron-enterobactin transporter subunit	3	3	735952	609497	975124	923552	112.308	106.368	109.338
fepD	16128573	3122	b0590	620408	621412	-	334	COG0609P	C	iron-enterobactin transporter subunit	1	1	805283	728109
entS	16128574	1382667	b0591	621523	622773	+	416	-	P	enterobactin exporter, iron-regulated	1	1	538052	237253
fepB	16128575	1382668	b0592	622777	623733	-	318	COG4592P	P	iron-enterobactin transporter subunit	6	6	3.0322e+06	3.74291e+06	3.04261e+06	3.72594e+06	350.426	429.126	389.776
entC	16128576	3123	b0593	624108	625283	+	391	COG1169HQ	P	isochorismate synthase 1	18	18	18093774	16639230	20891516	19246824	2406.13	2216.71	2311.42
entE	16128577	3123	b0594	625293	626903	+	536	COG1021Q	P	2,3-dihydroxybenzoate-AMP ligase component of enterobactin synthase multienzyme complex	15	15	11302191	9108668	14701923	12533964	1693.26	1443.57	1568.42
entB	16128578	3123	b0595	626917	627774	+	285	COG1535Q	P	isochorismatase	12	12	34513344	35151768	27405912	26792342	3156.42	3085.75	3121.08
entA	16128579	3123	b0596	627774	628520	+	248	COG1028IQR	P	2,3-dihydro-2,3-dihydroxybenzoate dehydrogenase	9	9	11654479	11640970	11588312	11475180	1334.66	1321.63	1328.14
entH	16128580	3123	b0597	628523	628936	+	137	COG2050Q	P	thioesterase required for efficient enterobactin production	2	2	1.82668e+06	1.88115e+06	1.76404e+06	2.39241e+06	203.169	275.541	239.355
CSTA	16128581	1382669	b0598	629117	631222	+	701	COG1966T	P	carbon starvation protein	4	4	2.44159e+06	2.05112e+06	2.06483e+06	1.46523e+06	237.813	168.755	203.284
ybdH	16128582	1382670	b0599	631612	632700	-	362	COG0371C	P	predicted oxidoreductase	5	5	1.39698e+06	1.62616e+06	2.43329e+06	2400323	280.249	276.452	278.35
ybdL	16128583	1382671	b0600	632809	633969	+	386	COG0436E	P	methionine aminotransferase, PLP-dependent	5	5	1.76528e+06	1.83896e+06	1.09629e+06	1173754	126.263	135.185	130.724
ahpC	16128588	1382673	b0605	638168	638731	+	187	COG0450O	C	alkyl hydroperoxide reductase, C22 subunit	13	13	79750784	74303696	113344600	113877488	13054.2	13115.6	13084.9
uspG	16128590	1382674	b0607	640662	641090	-	142	COG0589T	P	universal stress protein UP12	3	3	1.24879e+06	1.02849e+06	1.28892e+06	1.45745e+06	148.448	167.859	158.154
rnk	16128593	1382676	b0610	642780	643190	-	136	COG0782K	P	regulator of nucleoside diphosphate kinase	1	1	251611	312996
rna	16128594	1382677	b0611	643420	644226	-	268	COG3719J	P	ribonuclease I	4	4	5.83843e+06	3.30566e+06	6.38822e+06	3324512	735.749	382.893	559.321
cspE	16128606	1382680	b0623	656515	656724	+	69	COG1278K	P	DNA-binding transcriptional repressor	3	3	33677464	41158864	42907980	46957168	4941.83	5408.19	5175.01
tatE	16128610	1382682	b0627	658170	658373	+	67	-	C	TatABCE protein translocation system subunit	2	2	299786	275222	831454	806947	95.7609	92.9383	94.3496
lipA	16128611	1382683	b0628	658474	659439	-	321	COG0320H	P	lipoate synthase	7	7	2.2468e+06	2.65206e+06	2160879	2.98913e+06	248.875	344.266	296.57
ybeD	16128614	3127	b0631	661602	661865	-	87	COG2921S	P	conserved protein, UPF0250 family	4	3	708577	983780	823314	1.12202e+06	94.8234	129.226	112.025
dacA	16128615	1382684	b0632	661975	663186	-	403	COG1686M	P	D-alanyl-D-alanine carboxypeptidase (penicillin-binding protein 5)	15	15	12351704	11766087	13841383	12351863	1594.15	1422.6	1508.37
rlpA	16128616	3128	b0633	663325	664413	-	362	COG0797M	P	septal ring protein, suppressor of prc, minor lipoprotein	6	7	2.1407e+06	2386788	2162492	7003140	249.06	806.571	527.816
mrdB	16128617	3128	b0634	664424	665536	-	370	COG0772D	P	cell wall shape-determining protein	2	2	419712	706555	2.97394e+06	2.69042e+06	342.517	309.863	326.19
mrdA	16128618	3128	b0635	665539	667440	-	633	COG0768M	P	transpeptidase involved in peptidoglycan synthesis (penicillin-binding protein 2)	5	5	921314	979406	602922	619005	69.4403	71.2926	70.3664
rlmH	16128619	3128	b0636	667471	667938	-	155	COG1576S	P	23S rRNA m(3)Psi1915 pseudouridine methyltransferase; SAM-dependent	3	3	334681	443297	329234	413488	37.9188	47.6226	42.7707
holA	16128623	3129	b0640	669797	670828	-	343	COG1466L	P	DNA polymerase III, delta subunit	1	1	106709	95381.1
lptE	16128624	3129	b0641	670828	671409	-	193	COG2980M	P	LPS assembly OM complex LptDE, lipoprotein component	6	6	3.12634e+06	2976718	2.67743e+06	2.77427e+06	308.367	319.521	313.944
leuS	16128625	3129	b0642	671424	674006	-	860	COG0495J	P	leucyl-tRNA synthetase	34	34	20550366	17047744	16107221	13858050	1855.11	1596.07	1725.59
ybeL	16128626	1382685	b0643	674241	674723	+	160	-	P	conserved protein, DUF1451 family	1	1	577747	540641
rihA	16128634	3132	b0651	682700	683635	-	311	COG1957F	C	ribonucleoside hydrolase 1	1	1	417311	334676
gltL	16128635	3132	b0652	683753	684478	-	241	COG1126E	C	glutamate, aspartate ABC transporter ATP-binding subunit	2	2	2.46227e+06	2.52074e+06	1.59355e+06	1.65121e+06	183.533	190.175	186.854
gltK	16128636	3132	b0653	684478	685152	-	224	COG0765E	C	glutamate, aspartate ABC transporter permease subunit	1	1	98598.5	265149
gltJ	16128637	3132	b0654	685152	685892	-	246	COG0765E	C	glutamate, aspartate ABC transporter permease subunit	2	2	210739	214809	916795	765298	105.59	88.1416	96.8657
gltI	16128638	1382688	b0655	686062	686970	-	302	COG0834ET	P	glutamate, aspartate binding protein, periplasmic; part of GltJKLI ABC transporter	13	12	20863746	21685122	15857530	16453395	1826.36	1894.98	1860.67
lnt	16128640	3133	b0657	688566	690104	-	512	COG0815M	P	apolipoprotein N-acyltransferase	4	4	864247	745375	773586	670879	89.0961	77.267	83.1816
ybeX	16128641	3133	b0658	690129	691007	-	292	COG4535P	P	predicteed ion transport	7	7	2.68765e+06	2.5274e+06	3202732	3683848	368.868	424.279	396.573
YBEY	16128642	3133	b0659	691097	691564	-	155	COG0319R	P	metal-binding heat shock protein required for rRNA maturation	1	1	1.44404e+06	1.39416e+06
miaB	16128644	1382690	b0661	692754	694178	-	474	COG0621J	P	tRNA-i(6)A37 methylthiotransferase	7	7	4997238	5070078	2.2855e+06	3.20113e+06	263.228	368.684	315.956
ubiF	16128645	1382691	b0662	694324	695499	+	391	COG0654HC	P	2-octaprenyl-3-methyl-6-methoxy-1,4-benzoquinol oxygenase	2	2	1.65551e+06	1.75861e+06	1.76901e+06	1.78654e+06	203.741	205.761	204.751
asnB	16128650	1382692	b0674	696736	698400	-	554	COG0367E	P	asparagine synthetase B	23	23	13148048	13286897	8777841	8884822	1010.97	1023.29	1017.13
umpH	16128651	3134	b0675	698797	699549	-	250	COG0647G	P	UMP phosphatase	6	6	1.91434e+06	1839471	1958099	1.89552e+06	225.52	218.313	221.916
nagC	16128652	3134	b0676	699597	700817	-	406	COG1940KG	P	DNA-binding transcriptional dual regulator, repressor of N-acetylglucosamine	12	12	1.76879e+06	1.52102e+06	1.42116e+06	1.32222e+06	163.679	152.284	157.981
NAGA	16128653	3134	b0677	700826	701974	-	382	COG1820G	P	N-acetylglucosamine-6-phosphate deacetylase	5	5	1.339e+06	1192278	1.70034e+06	1.66255e+06	195.833	191.48	193.656
nagB	16128654	3134	b0678	702034	702834	-	266	COG0363G	P	glucosamine-6-phosphate deaminase	6	6	4199669	4349230	4319352	4434694	497.472	510.756	504.114
nagE	16128655	1382693	b0679	703167	705113	+	648	COG1263G	C	fused N-acetyl glucosamine specific PTS enzyme: IIC, IIB, and IIA components	8	8	1.53173e+06	1.26076e+06	2515171	2.38971e+06	289.679	275.23	282.454
glnS	16128656	1382694	b0680	705316	706980	+	554	COG0008J	P	glutamyl-tRNA synthetase	24	22	15450895	14728685	14334548	13205165	1650.95	1520.88	1585.91
fur	16128659	3136	b0683	709423	709869	-	148	COG0735P	P	DNA-binding transcriptional dual regulator of siderophore biosynthesis and transport	4	4	6697643	7775501	6888340	7.75469e+06	793.349	893.129	843.239
fldA	16128660	1382695	b0684	710158	710688	-	176	COG0716C	P	flavodoxin 1	4	4	1.42369e+06	1.18074e+06	526812	498047	60.6744	57.3614	59.0179
ybfF	16128662	1382696	b0686	711261	712025	-	254	COG0596R	P	acyl-CoA esterase in vitro	5	5	683287	555077	359264	492213	41.3775	56.6895	49.0335
seqA	16128663	3137	b0687	712210	712755	+	181	COG3057L	P	regulatory protein for replication initiation	6	6	5362940	4.35252e+06	5476198	4395514	630.709	506.244	568.476
pgm	16128664	3137	b0688	712781	714421	+	546	COG0033G	P	phosphoglucomutase	19	19	8407854	7001187	7459065	6037448	859.081	695.35	777.216
kdpD	16128671	3139	b0695	720953	723637	-	894	COG2205T	C	fused sensory histidine kinase in two-component regulatory system with KdpE: signal sensing protein	1	1	104836	84877.4
ybgA	16128682	3141	b0707	738224	738733	+	169	COG3272S	P	conserved protein, DUF1722 family	1	1	204084	264236
ybgI	16128685	3142	b0710	742050	742793	+	247	COG0327S	P	conserved metal-binding protein, NIF3 family	7	7	7.18685e+06	6.51715e+06	7181427	6.48217e+06	827.105	746.57	786.838
ybgJ	16128686	3142	b0711	742816	743472	+	218	COG2049E	P	predicted enzyme subunit	3	3	960481	867968	1680094	1.49199e+06	193.501	171.837	182.669
ybgK	16128687	3142	b0712	743466	744398	+	310	COG1984E	P	predicted enzyme subunit	2	2	1.23523e+06	1.31557e+06	910842	981807	104.904	113.077	108.991
nei	16128689	3142	b0714	745158	745949	+	263	COG0266L	P	endonuclease VIII/ 5-formyluracil/5-hydroxymethyluracil DNA glycosylase	2	2	223323	167362	260980	175681	30.0577	20.2336	25.1457
gltA	16128695	1382702	b0720	752408	753691	-	427	COG0372C	P	citrate synthase	19	19	83213232	84025728	71730320	71454600	8261.38	8229.63	8245.5
SDHC	16128696	3144	b0721	754400	754789	+	129	COG2009C	C	succinate dehydrogenase, membrane subunit, binds cytochrome b556	2	2	2.64896e+06	1.93935e+06	3449926	2740303	397.338	315.608	356.473
SDHD	16128697	3144	b0722	754783	755130	+	115	COG2142C	C	succinate dehydrogenase, membrane subunit, binds cytochrome b556	1	1	3978300	3.66507e+06
SDHA	16128698	3144	b0723	755130	756896	+	588	COG1053C	C	succinate dehydrogenase, flavoprotein subunit	20	20	20830636	22559356	14170213	15023627	1632.02	1730.31	1681.17
SDHB	16128699	3144	b0724	756912	757628	+	238	COG0479C	C	succinate dehydrogenase, FeS subunit	14	14	16193590	17067382	15253772	16519957	1756.82	1902.65	1829.73
sucA	16128701	3145	b0726	757929	760730	+	933	COG0567C	C	2-oxoglutarate decarboxylase, thiamin-requiring	36	36	16940308	16926556	16541491	16686800	1905.13	1921.87	1913.5
sucB	16128702	3145	b0727	760745	761962	+	405	COG0508C	C	dihydrolipoyltranssuccinase	11	11	41041764	42210840	25283334	26832222	2911.95	3090.34	3001.15
sucC	16128703	3146	b0728	762237	763403	+	388	COG0045C	C	succinyl-CoA synthetase, beta subunit	22	22	52241476	61038328	43272988	51228488	4983.87	5900.13	5442
sucD	16128704	3146	b0729	763403	764272	+	289	COG0074C	C	succinyl-CoA synthetase, NAD(P)-binding, alpha subunit	14	14	41160524	42855608	25411052	26812696	2926.66	3088.09	3007.38
cydB	16128709	3148	b0734	772265	773404	+	379	COG1294C	C	cytochrome d terminal oxidase, subunit II	2	2	2.63659e+06	1.97212e+06	2.42619e+06	1807717	279.431	208.2	243.815
tolQ	16128712	3149	b0737	774376	775068	+	230	COG0811U	C	membrane spanning protein in TolA-TolQ-TolR complex	5	5	1726552	1.47298e+06	1.58753e+06	1.35334e+06	182.84	155.868	169.354
tolR	16128713	3149	b0738	775072	775500	+	142	COG0848U	C	membrane spanning protein in TolA-TolQ-TolR complex	1	1	2068027	1.68686e+06
tolA	16128714	3149	b0739	775565	776830	+	421	COG3064M	C	membrane anchored protein in TolA-TolQ-TolR complex	4	4	236103	255752	529117	427626	60.9399	49.2509	55.0954
tolB	16128715	3150	b0740	776963	778255	+	430	COG0823U	P	periplasmic protein	12	12	6.02109e+06	6.70421e+06	6405748	6.31894e+06	737.768	727.77	732.769
PAL	16128716	3150	b0741	778290	778811	+	173	COG2885M	P	peptidoglycan-associated outer membrane lipoprotein	8	8	75876568	66720448	74512224	65889232	8581.78	7588.65	8085.22
ybgF	16128717	3150	b0742	778821	779612	+	263	COG1729S	P	periplasmic TolA-binding protein	6	6	2.64193e+06	2.46635e+06	2.63202e+06	2.21516e+06	303.137	255.126	279.132
nadA	16128718	3151	b0750	781308	782351	+	347	COG0379H	P	quinolinate synthase, subunit A	3	3	1.1425e+06	1.24484e+06	1.27581e+06	1.40567e+06	146.939	161.894	154.416
pnuC	16128719	3151	b0751	782389	783108	+	239	COG3201H	P	nicotinamide mononucleotide transporter	1	1	146679	125853
aroG	16128722	1382706	b0754	784856	785908	+	350	COG0722E	P	3-deoxy-D-arabino-heptulosonate-7-phosphate synthase, phenylalanine repressible	16	16	39767448	43716076	28253844	32034438	3254.07	3689.5	3471.79
gpmA	16128723	1382707	b0755	786066	786818	-	250	COG0588G	P	phosphoglyceromutase 1	15	15	71283240	70291520	70072240	68611040	8070.42	7902.13	7986.27
GALM	16128724	3152	b0756	787020	788060	-	346	COG2017G	P	galactose-1-epimerase (mutarotase)	9	9	6273294	5100188	5661302	4764848	652.028	548.781	600.405
galK	16128725	3152	b0757	788054	789202	-	382	COG0153G	P	galactokinase	5	5	1.40642e+06	1.36602e+06	1.42834e+06	1.33713e+06	164.506	154.001	159.253
modF	16128728	3153	b0760	791539	793011	-	490	COG1119P	C	fused molybdate transporter subunits of ABC superfamily: ATP-binding components	5	5	1729730	1.6605e+06	4206087	3.83616e+06	484.427	441.821	463.124
modE	16128729	3153	b0761	793079	793867	-	262	COG2005R	C	DNA-binding transcriptional repressor for the molybdenum transport operon modABC	5	5	859718	893761	1.29644e+06	1.39384e+06	149.315	160.533	154.924
modA	16128731	3154	b0763	794312	795085	+	257	COG0725P	C	molybdate transporter subunit	15	15	24434790	28872582	12288046	14711400	1415.25	1694.35	1554.8
modC	16128733	3154	b0765	795777	796835	+	352	COG4148P	C	molybdate transporter subunit	2	2	795957	856816	399811	493095	46.0473	56.7911	51.4192
ybhA	16128734	1382709	b0766	796836	797654	-	272	COG0561R	P	pyridoxal phosphate (PLP) phosphatase	2	2	401810	366133	459904	561513	52.9684	64.671	58.8197
pgl	16128735	1382710	b0767	797809	798804	+	331	COG2706G	P	6-phosphogluconolactonase	6	6	8617580	7351365	8406471	6.99928e+06	968.197	806.127	887.162
ybhC	16128740	1382711	b0772	805221	806504	-	427	COG4677G	P	acyl-CoA thioesterase, lipoprotein	6	6	3.6513e+06	3.91379e+06	4.80984e+06	4497225	553.963	517.958	535.961
ybhB	16128741	3156	b0773	806656	807132	-	158	COG1881R	P	kinase inhibitor homolog, UPF0098 family	2	2	1.41461e+06	1.31582e+06	1396125	1.2993e+06	160.796	149.644	155.22
bioA	16128742	3156	b0774	807191	808480	-	429	COG0161H	P	7,8-diaminopelargonic acid synthase, PLP-dependent	8	8	1.78365e+06	1.67428e+06	2.08486e+06	1.65805e+06	240.12	190.962	215.541
bioB	16128743	3157	b0775	808567	809607	+	346	COG0502H	P	biotin synthase	6	6	690032	656458	1.143e+06	1172655	131.642	135.058	133.35
bioF	16128744	3157	b0776	809604	810758	+	384	COG0156H	P	8-amino-7-oxononanoate synthase	2	2	467163	530682	389232	415027	44.8289	47.7998	46.3144
bioC	16128745	3157	b0777	810745	811500	+	251	COG2226H	P	malonyl-CoA methyltransferase, SAM-dependent	1	1	9182.52	8239.51
bioD	16128746	3157	b0778	811493	812170	+	225	COG0132H	P	dethiobiotin synthetase	6	6	2193866	2.12248e+06	2.26924e+06	2.1573e+06	261.355	248.463	254.909
uvrB	16128747	1382712	b0779	812749	814770	+	673	COG0556L	C	excinulease of nucleotide excision repair, DNA damage recognition component	12	12	1233067	1.00797e+06	1860230	1.16888e+06	214.248	134.623	174.436
ybhK	16128748	1382713	b0780	814962	815870	-	302	COG0391S	P	predicted transferase with NAD(P)-binding Rossmann-fold domain	1	1	156296	256837
moaA	16128749	3158	b0781	816267	817256	+	329	COG2896H	P	molybdopterin biosynthesis protein A	2	2	208024	126812	206658	127897	23.8014	14.7302	19.2658
moaB	16128750	3158	b0782	817278	817790	+	170	COG0521H	P	molybdopterin biosynthesis protein B	5	5	4526301	4012211	4.05617e+06	4.44638e+06	467.161	512.103	489.632
moaD	16128752	3158	b0784	818271	818516	+	81	COG1977H	P	molybdopterin synthase, small subunit	2	2	354662	456940	150620	190949	17.3473	21.9921	19.6697
moaE	16128753	3158	b0785	818518	818970	+	150	COG0314H	P	molybdopterin synthase, large subunit	1	1	184417	493704
ybhL	16128754	1382714	b0786	819107	819811	+	234	COG0670R	P	inner membrane protein, UPF0005 family	1	1	4537215	3.33993e+06
ybhG	16128763	3160	b0795	828197	829195	-	332	COG1566V	C	predicted membrane fusion protein (MFP) component of efflux pump, membrane anchor	4	4	1.27784e+06	1.05687e+06	1.378e+06	681971	158.708	78.5445	118.626
rhlE	16128765	1382717	b0797	830095	831459	+	454	COG0513LKJ	P	ATP-dependent RNA helicase	8	8	854524	858704	1.08649e+06	1.06783e+06	125.135	122.985	124.06
ybiB	16128768	3161	b0800	834471	835433	+	320	COG0547E	P	predicted family 3 glycosyltransferase	12	12	5078611	4.41274e+06	3546532	3.19932e+06	408.464	368.474	388.469
ybiC	16128769	1382719	b0801	835574	836659	+	361	COG2055C	P	predicted dehydrogenase	12	12	4.02836e+06	1.82748e+06	2740855	2.39408e+06	315.672	275.733	295.703
fiu	16128773	3162	b0805	838472	840754	-	760	COG4774P	P	catecholate siderophore receptor Fiu	31	31	24584964	28284292	15508031	18345946	1786.1	2112.95	1949.53
glnQ	16128777	3163	b0809	844964	845686	-	240	COG1126E	C	glutamine transporter subunit	4	4	2.64923e+06	2708617	2.51897e+06	2.64317e+06	290.117	304.421	297.269
glnP	16128778	3163	b0810	845683	846342	-	219	COG0765E	C	glutamine transporter subunit	3	3	2.50513e+06	2.98225e+06	2.71086e+06	2.97054e+06	312.217	342.125	327.171
glnH	16128779	3163	b0811	846481	847227	-	248	COG0834ET	C	glutamine transporter subunit	13	13	9017350	8.26726e+06	8002885	7097170	921.715	817.401	869.558
dps	16128780	1382721	b0812	847631	848134	-	167	COG0783P	P	Fe-binding and storage protein	9	9	5536260	10038676	5395038	10094461	621.362	1162.61	891.985
ompX	16128782	1382723	b0814	849673	850188	+	171	COG3637M	P	outer membrane protein X	6	6	18297656	2.8803e+06	25893638	3.61074e+06	2982.24	415.859	1699.05
mntR	16128785	3164	b0817	852406	852873	+	155	COG1321K	P	DNA-binding transcriptional regulator of mntH	3	3	903818	760751	1.83586e+06	772896	211.442	89.0166	150.229
ldtB	16128787	1382726	b0819	854047	854967	-	306	COG1376S	P	L,D-transpeptidase linking Lpp to murein	9	8	8658110	8400670	5029251	5.1033e+06	579.233	587.762	583.497
ybiT	16128788	1382727	b0820	855186	856778	+	530	COG0488R	P	fused predicted transporter subunits of ABC superfamily: ATP-binding components	17	16	4429851	4638928	3545690	3485086	408.367	401.387	404.877
ybiU	16128789	1382728	b0821	857019	858284	-	421	-	P	predicted protein	3	3	659172	491074	114170	106000	13.1493	12.2083	12.6788
ybiV	16128790	1382729	b0822	858436	859251	-	271	COG0561R	P	sugar phosphatase; preference for fructose-1-P, ribose-5-P and glucose-6-P	5	5	1.04522e+06	958573	771951	904941	88.9077	104.225	96.5662
moeA	16128795	3166	b0827	864352	865587	-	411	COG0303H	P	molybdopterin biosynthesis protein	6	6	3.47426e+06	3.49349e+06	3.46281e+06	3.60584e+06	398.822	415.295	407.058
iaaA	16128796	3167	b0828	865791	866756	+	321	COG1446E	P	Isoaspartyl peptidase	3	3	686913	661746	948179	995730	109.204	114.681	111.943
gsiB	16128798	3167	b0830	868634	870172	+	512	COG0747E	P	glutathione periplasmic binding protein, ABC superfamily transporter	15	15	3651407	3.32104e+06	3.6933e+06	3.27196e+06	425.367	376.84	401.104
gsiC	16128799	3167	b0831	870190	871110	+	306	COG0601EP	P	glutathione transporter, permease component, ABC superfamily	3	3	723590	613163	801437	658588	92.3037	75.8515	84.0776
rimO	16128803	1382730	b0835	875933	877258	-	441	COG0621J	P	ribosomal protein S12 methylthiotransferase; radical SAM superfamily	7	7	2.27717e+06	2.4309e+06	1.79058e+06	1.79599e+06	206.226	206.849	206.538
dacC	16128807	1382733	b0839	879950	881152	+	400	COG1686M	P	D-alanyl-D-alanine carboxypeptidase (penicillin-binding protein 6a)	14	13	7.43085e+06	5.64282e+06	3.53429e+06	3100444	407.054	357.087	382.07
deoR	16128808	3169	b0840	881199	881957	-	252	COG1349KG	P	DNA-binding transcriptional repressor	1	1	928890	729140
nfsA	16128819	3171	b0851	890407	891129	+	240	COG0778C	P	nitroreductase A, NADPH-dependent, FMN-dependent	7	7	2.68588e+06	2.45569e+06	2.7414e+06	2.38947e+06	315.735	275.202	295.468
ybjN	16128821	1382740	b0853	892180	892656	+	158	-	P	predicted oxidoreductase	1	1	500052	456408
potF	16128822	3172	b0854	893007	894119	+	370	COG0687E	C	putrescine transporter subunit: periplasmic-binding component of ABC superfamily	5	5	1.87352e+06	2.45128e+06	2.22812e+06	2.86951e+06	256.619	330.489	293.554
artJ	16128828	1382741	b0860	899067	899798	-	243	COG0834ET	C	arginine binding protein, periplasmic	8	8	13835829	15209654	10337809	10802914	1190.63	1244.2	1217.42
artQ	16128830	3173	b0862	900757	901473	-	238	COG4215E	C	arginine transporter subunit	2	2	837029	838186	722794	670665	83.2462	77.2423	80.2442
artI	16128831	3173	b0863	901480	902211	-	243	COG0834ET	C	arginine transporter subunit	10	10	3.27664e+06	2.93735e+06	12721782	5.36002e+06	1465.2	617.328	1041.27
artP	16128832	3173	b0864	902229	902957	-	242	COG4161E	C	arginine transporter subunit	3	3	477125	628828	2042255	2158035	235.212	248.547	241.88
ybjP	16128833	1382742	b0865	903175	903690	-	171	-	P	lipoprotein	6	6	8.33824e+06	6538569	7227445	5609714	832.405	646.087	739.246
ybjQ	16128834	3174	b0866	903816	904139	+	107	COG0393S	P	conserved protein, UPF0145 family	2	2	2302602	2.07604e+06	2.27888e+06	1.99862e+06	262.465	230.186	246.326
amid	16128835	3174	b0867	904136	904966	+	276	COG3023V	P	1,6-anhydro-N-acetylmuramyl-L-alanine amidase, Zn-dependent; OM lipoprotein	2	2	2.54606e+06	2.1558e+06	169643	169346	19.5382	19.5041	19.5212
ltaE	16128838	3175	b0870	907516	908517	-	333	COG2008E	P	L-allo-threonine aldolase, PLP-dependent	8	8	5.17961e+06	5506668	5.15954e+06	5.40887e+06	594.239	622.954	608.597
poxB	16128839	3175	b0871	908554	910272	-	572	COG0028EH	P	pyruvate dehydrogenase (pyruvate oxidase), thiamin-dependent, FAD-binding	7	7	3.57394e+06	3642818	3.13057e+06	3.18518e+06	360.557	366.846	363.701
ybjD	16128844	1382744	b0876	915696	917354	+	552	COG3593L	P	conserved protein with nucleoside triphosphate hydrolase domain	2	2	510746	401090	374674	321513	43.1522	37.0295	40.0909
ybjX	16128845	1382745	b0877	917351	918343	-	330	COG2990S	P	conserved protein	1	1	262271	337807
macB	16128847	3177	b0879	919570	921516	+	648	COG1136V	C	fused macrolide transporter subunits of ABC superfamily: ATP-binding component/membrane component	6	6	280924	271057	370489	444487	42.6702	51.1928	46.9315
cspD	16128848	1382746	b0880	921589	921813	-	74	COG1278K	P	inhibitor of DNA replication, cold shock protein homolog	2	2	663650	664779	806574	855587	92.8954	98.5404	95.7179
CLPS	16128849	3178	b0881	922136	922456	+	106	COG2127S	P	regulatory protein for ClpA substrate specificity	1	1	639751	765648
clpA	16128850	3178	b0882	922487	924763	+	758	COG0542O	P	ATPase and specificity subunit of ClpA-ClpP ATP-dependent serine protease, chaperone activity	30	30	7.21814e+06	7.44541e+06	7889270	8142993	908.629	937.851	923.24
INFA	16128851	1382747	b0884	925448	925666	-	72	COG0361J	P	translation initiation factor IF-1	3	3	7339709	6.99529e+06	9182462	11149817	1057.57	1284.16	1170.86
cydC	16128853	3179	b0886	926697	928418	-	573	COG4987CO	C	fused glutathione, cysteine exporter subunits of ABC superfamily: membrane component/ATP-binding component	11	11	1.47078e+06	1.43822e+06	1.10456e+06	1.18931e+06	127.215	136.977	132.096
cydD	16128854	3179	b0887	928419	930185	-	588	COG4988CO	C	fused glutathione, cysteine exporter subunits of ABC superfamily: membrane component/ATP-binding component	6	6	1.1209e+06	1.20564e+06	1.74993e+06	1.75808e+06	201.544	202.483	202.014
trxB	16128855	1382748	b0888	930308	931273	-	321	COG0492O	P	thioredoxin reductase, FAD/NAD(P)-binding	12	12	6726848	6.35146e+06	9908873	8623218	1141.23	993.16	1067.2
lrp	16128856	1382749	b0889	931818	932312	+	164	COG1522K	P	DNA-binding transcriptional dual regulator, leucine-binding	9	9	66253836	64933548	61292116	62894656	7059.19	7243.75	7151.47
ftsK	16128857	1382750	b0890	932447	936436	+	1329	COG1674D	P	DNA translocase at septal ring sorting daughter chromsomes	5	5	516219	524458	913568	780180	105.218	89.8555	97.5368
RARA	16128859	3180	b0892	937217	938560	+	447	COG2256L	P	DNA-dependent ATPase involved in processing recombination intermediates at replication forks	4	4	256170	201627	396340	366668	45.6476	42.2302	43.9389
serS	16128860	3180	b0893	938651	939943	+	430	COG0172J	P	seryl-tRNA synthetase, also charges selenocysteinyl-tRNA with serine	20	19	21536890	18885008	17268080	15531007	1988.81	1788.75	1888.78
ycaC	16128864	1382751	b0897	944154	944780	-	208	COG1335Q	P	predicted hydrolase, isochorismatase family	3	3	631686	441408	830925	670606	95.6999	77.2356	86.4678
ycaK	16128868	1382754	b0901	948891	949481	+	196	COG2249R	P	conserved protein	1	1	456659	369891
pflA	16128869	1382755	b0902	949563	950303	-	246	COG1180O	P	pyruvate formate lyase activating enzyme 1	6	6	1.02889e+06	1.10246e+06	1.10764e+06	820198	127.571	94.4646	111.018
pflB	16128870	3182	b0903	950495	952777	-	760	COG1882C	P	pyruvate formate lyase I	39	38	55776044	36718224	62746952	46328040	7226.74	5335.73	6281.24
focA	16128871	3182	b0904	952832	953689	-	285	COG2116P	P	formate channel	2	2	555733	3.13596e+06	547879	395832	63.1008	45.5891	54.3449
serC	16128874	3183	b0907	956876	957964	+	362	COG1932HE	P	3-phosphoserine/phosphohydroxythreonine aminotransferase	18	18	54512188	51013812	70331544	64258580	8100.28	7400.84	7750.56
aroA	16128875	3183	b0908	958035	959318	+	427	COG0128E	P	5-enolpyruvylshikimate-3-phosphate synthetase	15	14	14838686	12459192	11657102	9739141	1342.58	1121.68	1232.13
cmk	16128877	3184	b0910	960424	961107	+	227	COG0283F	P	cytidylate kinase	7	7	4.07975e+06	3.80259e+06	3.17694e+06	2.93481e+06	365.897	338.01	351.953
RPSA	16128878	3184	b0911	961218	962891	+	557	COG0539J	P	30S ribosomal subunit protein S1	33	33	81390408	90213432	68277944	73754160	7863.76	8494.47	8179.12
ihfB	16128879	1382757	b0912	963051	963335	+	94	COG0776L	C	integration host factor (IHF), DNA-binding protein, beta subunit	3	3	5295655	5784673	5.02497e+06	5441234	578.74	626.682	602.711
msbA	16128881	3185	b0914	965844	967592	+	582	COG1132V	P	fused lipid transporter subunits of ABC superfamily: membrane component/ATP-binding component	13	13	4776953	4.17341e+06	3.99961e+06	3.63193e+06	460.647	418.3	439.473
kdsB	16128885	3185	b0918	970075	970821	+	248	COG1212M	P	3-deoxy-manno-octulosonate cytidylyltransferase	7	7	3.54646e+06	3.8315e+06	5.0096e+06	5.45157e+06	576.97	627.872	602.421
elyC	16128887	1382759	b0920	971845	972624	-	259	COG1434S	P	conserved protein, DUF218 superfamily	2	1	567890	980305
mukF	16128889	3186	b0922	973542	974864	+	440	COG3006D	C	chromosome condensin MukBEF, kleisin-like subunit, binds calcium	12	12	1.21651e+06	1152085	1.2075e+06	1.25012e+06	139.071	143.98	141.526
mukB	16128891	3186	b0924	975549	980009	+	1486	COG3096D	C	chromosome condensin MukBEF, ATPase and DNA-binding subunit	36	35	6069805	5.08136e+06	4.56309e+06	4.21949e+06	525.543	485.97	505.757
ldtD	16128892	1382760	b0925	980270	982117	+	615	COG2989S	P	murein L,D-transpeptidase	7	7	1.30292e+06	1.46394e+06	1.2801e+06	1.35364e+06	147.433	155.903	151.668
ycbL	16128894	3187	b0927	982873	983520	+	215	COG0491R	P	predicted metal-binding enzyme	6	6	2.28304e+06	2292181	2.36855e+06	2.32155e+06	272.792	267.379	270.085
aspC	16128895	1382761	b0928	983742	984932	-	396	COG1448E	P	aspartate aminotransferase, PLP-dependent	24	24	66613580	67908568	52846008	50151108	6086.42	5776.04	5931.23
ompF	16128896	1382762	b0929	985117	986205	-	362	COG3203M	C	outer membrane porin 1a (Ia;b;F)	17	17	64023548	46530984	54632292	38492804	6292.15	4433.32	5362.74
ASNS	16128897	1382763	b0930	986808	988208	-	466	COG0017J	P	asparaginyl tRNA synthetase	20	20	26653162	26508842	29171530	27679626	3359.77	3187.94	3273.85
pncB	16128898	1382764	b0931	988377	989579	-	400	COG1488H	P	nicotinate phosphoribosyltransferase	13	13	5.15758e+06	5.01413e+06	4.01404e+06	4.0338e+06	462.308	464.585	463.447
pepN	16128899	1382765	b0932	989845	992457	+	870	COG0308E	P	aminopeptidase N	26	26	15304970	14817514	14555252	14100572	1676.37	1624	1650.19
PYRD	16128912	1382766	b0945	1003991	1005001	+	336	COG0167F	P	dihydro-orotate oxidase, FMN-linked	12	12	9527738	10711653	6.2125e+06	7.3149e+06	715.511	842.478	778.994
ycbX	16128914	1382767	b0947	1005714	1006823	-	369	COG3217R	P	predicted 2Fe-2S cluster-containing protein; 6-N-hydroxylaminopurine resistance protein	10	10	1.21112e+06	1167634	1.106e+06	1.16637e+06	127.381	134.334	130.857
rlmL	16128915	3190	b0948	1007067	1009175	+	702	COG0116L	P	23S rRNA mG2445 methyltransferase, SAM-dependent	14	14	1.66635e+06	1.62362e+06	2.66148e+06	2625889	306.53	302.431	304.481
uup	16128916	3190	b0949	1009187	1011094	+	635	COG0488R	P	fused predicted transporter subunits of ABC superfamily: ATP-binding components	14	14	1.48941e+06	1.49179e+06	1.23642e+06	1.23083e+06	142.402	141.758	142.08
pqiB	16128918	3191	b0951	1012482	1014122	+	546	COG3008R	P	paraquat-inducible protein B	8	8	944001	768736	2.18087e+06	1.93019e+06	251.177	222.305	236.741
fabA	16128921	3192	b0954	1015175	1015693	-	172	COG0764I	P	beta-hydroxydecanoyl thioester dehydrase	6	6	54974920	52298516	40233276	37168280	4633.78	4280.78	4457.28
ycbZ	16128922	3192	b0955	1015762	1017522	-	586	COG1067O	P	predicted peptidase	9	8	1.60991e+06	1.10638e+06	1072519	978559	123.525	112.703	118.114
matP	16128923	1382769	b0956	1017708	1018160	+	150	COG3120S	P	Ter macrodomain organizer matS-binding protein	2	2	2.38559e+06	1993834	2304337	1.93219e+06	265.397	222.536	243.966
ompA	16128924	1382770	b0957	1018236	1019276	-	346	COG2885M	P	outer membrane protein A (3a;II*;G;d)	18	17	436313152	448624288	376181376	388862560	43325.9	44786.4	44056.1
yccF	16128928	3193	b0961	1023125	1023571	-	148	COG3304S	P	inner membrane protein, DUF307 family	3	3	1.61372e+06	1.32391e+06	1.45937e+06	1144798	168.08	131.85	149.965
helD	16128929	1382773	b0962	1023694	1025748	+	684	COG0210L	P	DNA helicase IV	10	10	778693	670023	726860	598517	83.7145	68.9329	76.3237
yccX	16128935	1382775	b0968	1029287	1029565	+	92	COG1254C	P	weak acylphosphatase	2	1	588270	570959
etk	16128947	3197	b0981	1041253	1043433	-	726	COG3206M	P	cryptic autophosphorylating protein tyrosine kinase Etk	2	2	167073		503428	367569	57.9812	42.334	50.1576
cspG	16128956	1382779	b0990	1050684	1050896	+	70	COG1278K	P	cold shock protein homolog, cold-inducible	1	1	710631	1.08779e+06
cbpA	16128966	3201	b1000	1062078	1062998	-	306	COG0484O	P	curved DNA-binding protein, DnaJ homologue that functions as a co-chaperone of DnaK	4	4	781227	574945	687552	578110	79.1872	66.5825	72.8849
AGP	16128968	1382784	b1002	1064808	1066049	+	413	-	P	glucose-1-phosphatase/inositol phosphatase	9	9	1.83325e+06	1.71129e+06	1.78499e+06	1727511	205.582	198.962	202.272
yccJ	16128969	3202	b1003	1066087	1066314	-	75	-	P	predicted protein	1	1	613697	365917
wrbA	16128970	3202	b1004	1066335	1066931	-	198	COG0655R	P	NAD(P)H:quinone oxidoreductase	8	8	9351658	7862102	9421162	7985636	1085.06	919.728	1002.39
rutR	16128979	1382785	b1013	1073465	1074103	+	212	COG1309K	P	DNA-binding transcriptional repressor for rut operon	2	2	406169	274921	400346	240320	46.109	27.6783	36.8937
putA	16128980	1382786	b1014	1074143	1078105	-	1320	COG4230C	P	fused DNA-binding transcriptional regulator/proline dehydrogenase/pyrroline-5-carboxylate dehydrogenase	8	8	367651	322973	6.62094e+06	672261	762.552	77.4262	419.989
putP	16128981	1382787	b1015	1078528	1080036	+	502	COG0591ER	P	proline:sodium symporter	3	3	1.62598e+06	1.54386e+06	1.42041e+06	1.4516e+06	163.593	167.185	165.389
efeO	16128982	3204	b1018	1081466	1082593	+	375	COG2822P	P	inactive ferrous ion transporter EfeUOB	20	20	9514138	7.97314e+06	9403072	7811734	1082.98	899.699	991.339
efeB	16128983	3204	b1019	1082599	1083870	+	423	COG2837P	P	deferrrochelatase, periplasmic	9	8	1.07796e+06	1017407	7.22603e+06	6.61464e+06	832.242	761.826	797.034
phoH	16128984	1382788	b1020	1084215	1085279	+	354	COG1702T	P	conserved protein with nucleoside triphosphate hydrolase domain	2	2	1.59621e+06	76513	92788	76133.9	10.6866	8.76855	9.7276
ycdX	16128997	3207	b1034	1098102	1098839	+	245	COG1387ER	P	predicted zinc-binding hydrolase	5	5	1686218	1.4643e+06	2.26878e+06	2.06746e+06	261.302	238.115	249.709
ycdY	16128998	3207	b1035	1098863	1099417	+	184	COG3381R	P	conserved protein, REMP family	4	4	4.71163e+06	4625403	3939942	4010424	453.774	461.892	457.833
csgG	16129000	3208	b1037	1100074	1100907	-	277	COG1462M	C	curli production assembly/transport outer membrane lipoprotein	1	1	686872	462686
ymdB	16129008	3210	b1045	1105043	1105576	+	177	COG2110R	P	O-acetyl-ADP-ribose deacetylase; RNase III inhibitor during cold shock	2	2	354237	326303	334925	357847	38.5742	41.2143	39.8943
opgG	16129011	3211	b1048	1108558	1110093	+	511	COG3131P	P	osmoregulated periplasmic glucan (OPG) biosynthesis periplasmic protein	23	23	11037452	11721377	12483696	13257888	1437.78	1526.95	1482.37
opgH	16129012	3211	b1049	1110086	1112629	+	847	COG2943M	P	membrane glycosyltransferase	15	14	4.11771e+06	3.75686e+06	3.73925e+06	3.53898e+06	430.66	407.594	419.127
lpxL	16129017	1382794	b1054	1114885	1115805	-	306	COG1560M	P	lauryl-acyl carrier protein (ACP)-dependent acyltransferase	3	3	362210	340439	332142	344284	38.2537	39.6522	38.9529
yceA	16129018	1382795	b1055	1116030	1117082	+	350	COG1054R	P	predicted rhodanese-related sulfurtransferase	4	3	808480	2.05519e+06	2.05669e+06	701735	236.875	80.8208	158.848
yceI	16129019	3212	b1056	1117124	1117699	-	191	COG2353S	P	secreted protein	4	4	1119921	804097	3457049	3195287	398.158	368.01	383.084
solA	16129022	3213	b1059	1118691	1119809	-	372	COG0665E	P	N-methyltryptophan oxidase, FAD-binding	14	14	3.51654e+06	3.22299e+06	3.60146e+06	3.17593e+06	414.79	365.781	390.285
pyrC	16129025	1382797	b1062	1120784	1121830	-	348	COG0418F	P	dihydro-orotase	12	12	17354176	20739184	10102030	11742862	1163.48	1352.46	1257.97
yceB	16129026	1382798	b1063	1121936	1122496	-	186	-	P	lipoprotein, DUF1439 family	3	3	1.24725e+06	1.08894e+06	1.28802e+06	1.17993e+06	148.345	135.896	142.121
grxB	16129027	3214	b1064	1122630	1123277	-	215	COG2999O	P	glutaredoxin 2 (Grx2)	10	10	10977870	9596420	11942284	10126715	1375.43	1166.32	1270.87
rimJ	16129029	3215	b1066	1124785	1125369	+	194	COG1670J	P	ribosomal-protein-S5-alanine N-acetyltransferase	5	5	1.46041e+06	1332425	1.49119e+06	6.02862e+06	171.744	694.333	433.039
yceH	16129030	3215	b1067	1125380	1126027	+	215	COG3132S	P	conserved protein, UPF0502 family	10	10	3.9134e+06	3692209	3659062	3.41329e+06	421.424	393.118	407.271
yceM	16129031	3215	b1068	1126029	1126952	+	307	COG0673R	P	predicted oxidoreductase with NAD(P)-binding Rossmann-fold domain	3	3	443046	303879	550536	509343	63.4067	58.6625	61.0346
murJ	16129032	1382799	b1069	1127062	1128597	+	511	COG0728R	P	probable peptidoglycan lipid II flippase required for murein synthesis	2	2	125209	149766	184410	249229	21.239	28.7044	24.9717
flgN	16129033	3216	b1070	1128637	1129053	-	138	COG3418NUO	P	export chaperone for FlgK and FlgL	4	4	449887	365692	583669	580264	67.2228	66.8306	67.0267
flgM	16129034	3216	b1071	1129058	1129351	-	97	COG2747KNU	P	anti-sigma factor for FliA (sigma 28)	1	1	293316	239345
flgC	16129037	3217	b1074	1130661	1131065	+	134	COG1558N	C	flagellar component of cell-proximal portion of basal-body rod	1	1	178253	228816
flgD	16129038	3217	b1075	1131077	1131772	+	231	COG1843N	C	flagellar hook assembly protein	2	2	587009	425146	309255	468871	35.6177	54.0012	44.8094
flgE	16129039	3217	b1076	1131797	1133005	+	402	COG1749N	C	flagellar hook protein	5	5	1.6486e+06	892479	1.44713e+06	1182799	166.67	136.226	151.448
flgG	16129041	3218	b1078	1133952	1134734	+	260	COG4786N	C	flagellar component of cell-distal portion of basal-body rod	4	4	542580	584347	1.3572e+06	1.21701e+06	156.313	140.166	148.239
flgH	16129042	3218	b1079	1134787	1135485	+	232	COG2063N	C	flagellar protein of basal-body outer-membrane L ring	5	5	5418309	4.77953e+06	7.35887e+06	6.85906e+06	847.542	789.977	818.76
flgK	16129045	3218	b1082	1137601	1139244	+	547	COG1256N	C	flagellar hook-filament junction protein 1	2	3	663488	265904	888836	479258	102.37	55.1975	78.7836
flgL	16129046	3218	b1083	1139256	1140209	+	317	COG1344N	C	flagellar hook-filament junction protein	3	3	301240	413391	726102	399512	83.6272	46.0129	64.82
rne	16129047	1382801	b1084	1140405	1143590	-	1061	COG1530J	C	fused ribonucleaseE: endoribonuclease/RNA-binding protein/RNA degradosome binding protein	33	33	13816496	14451891	13646711	14263342	1571.73	1642.75	1607.24
rluC	16129049	1382802	b1086	1144163	1145122	+	319	COG0564J	P	23S rRNA pseudouridine synthase; specific to U955, U2504, and U2580	5	5	1.5798e+06	1.10249e+06	1.73823e+06	1.18213e+06	200.197	136.149	168.173
yceD	16129051	3219	b1088	1146017	1146538	+	173	COG1399R	P	conserved protein, DUF177 family	3	3	5166255	4.80532e+06	4320920	3.67828e+06	497.653	423.638	460.645
rpmF	16129052	3219	b1089	1146590	1146763	+	57	COG0333J	P	50S ribosomal subunit protein L32	3	3	21853890	21517704	21273062	20288198	2450.08	2336.65	2393.36
fabH	16129054	3219	b1091	1147982	1148935	+	317	COG0332I	P	3-oxoacyl-[acyl-carrier-protein] synthase III	11	11	14413119	14830291	14115526	8913635	1625.72	1026.61	1326.17
fabD	16129055	3219	b1092	1148951	1149880	+	309	COG0331I	P	malonyl-CoA-[acyl-carrier-protein] transacylase	8	8	7515928	7.91305e+06	7284213	7.72698e+06	838.943	889.938	864.44
fabG	16129056	3219	b1093	1149893	1150627	+	244	COG1028IQR	P	3-oxoacyl-[acyl-carrier-protein] reductase	10	10	38252600	38147624	38405276	37966688	4423.24	4372.73	4397.99
ACPP	16129057	1382803	b1094	1150838	1151074	+	78	COG0236IQ	P	acyl carrier protein (ACP)	3	3	156556144	111490080	157612128	107748912	18152.6	12409.7	15281.2
fabF	16129058	1382804	b1095	1151162	1152403	+	413	COG0304IQ	P	3-oxoacyl-[acyl-carrier-protein] synthase II	13	13	5574818	6.6465e+06	5200563	6.12298e+06	598.963	705.201	652.082
yceG	16129060	3220	b1097	1153335	1154357	+	340	COG1559R	P	predicted aminodeoxychorismate lyase	2	2	641726	651286	631176	600498	72.6944	69.161	70.9277
tmk	16129061	3220	b1098	1154347	1154988	+	213	COG0125F	P	thymidylate kinase	9	9	1.17523e+06	1.32047e+06	1092797	1.22164e+06	125.861	140.7	133.28
holB	16129062	3220	b1099	1154985	1155989	+	334	COG0470L	P	DNA polymerase III, delta prime subunit	2	2	276204	206496	320353	304545	36.896	35.0753	35.9856
ycfH	16129063	3220	b1100	1156000	1156797	+	265	COG0084L	P	predicted DNAse	5	5	888745	945698	1.05723e+06	1.10534e+06	121.764	127.305	124.535
ptsG	16129064	1382805	b1101	1157092	1158525	+	477	COG1263G	C	fused glucose-specific PTS enzymes: IIB component/IIC component	14	14	46749368	36078540	32672988	23551718	3763.04	2712.52	3237.78
fhuE	16129065	1382806	b1102	1158585	1160774	-	729	COG4773P	P	ferric-rhodotorulic acid outer membrane transporter	27	26	5.30244e+06	6795359	5.84918e+06	8397925	673.666	967.213	820.44
lpoB	16129068	3221	b1105	1161861	1162502	+	213	COG3417R	P	outer membrane lipoprotein	4	4	2644755	3.15856e+06	2696561	3.19024e+06	310.571	367.429	339
nagZ	16129070	3221	b1107	1163318	1164343	+	341	COG1472G	P	beta N-acetyl-glucosaminidase	5	4	450846	437369	446325	428326	51.4045	49.3315	50.368
ndh	16129072	1382807	b1109	1165308	1166612	+	434	COG1252C	P	respiratory NADH dehydrogenase 2/cupric reductase	17	17	11109093	8653498	9420312	7.31468e+06	1084.96	842.452	963.708
mfd	16129077	1382811	b1114	1169741	1173187	-	1148	COG1197LK	P	transcription-repair coupling factor	20	20	3.49143e+06	3.34622e+06	5346172	5.6719e+06	615.734	653.249	634.491
lolC	16129079	3222	b1116	1174650	1175849	+	399	COG4591M	C	lipoprotein-releasing system transmembrane protein	5	5	1.61141e+06	1.19865e+06	1.32711e+06	919608	152.847	105.914	129.381
lolE	16129081	3222	b1118	1176543	1177787	+	414	COG4591M	C	lipoprotein-releasing system transmembrane protein	4	4	616530	561385	2.60161e+06	736402	299.635	84.8135	192.224
potD	16129086	3223	b1123	1181006	1182052	-	348	COG0687E	P	polyamine transporter subunit	16	16	17099110	12023308	12227406	8473119	1408.26	975.873	1192.07
potC	16129087	3223	b1124	1182049	1182843	-	264	COG1177E	P	polyamine transporter subunit	2	2	1.14291e+06	1.60715e+06	1.14368e+06	904364	131.72	104.158	117.939
potA	16129089	3223	b1126	1183681	1184817	-	378	COG3842E	P	polyamine transporter subunit	11	11	4.84997e+06	4852914	4864361	4844721	560.242	557.98	559.111
pepT	16129090	1382813	b1127	1185067	1186293	+	408	COG2195E	P	peptidase T	9	9	2.08099e+06	1.77116e+06	1.48236e+06	1.36039e+06	170.727	156.679	163.703
phoQ	16129092	3224	b1129	1187539	1188999	-	486	COG0642T	P	sensory histidine kinase in two-component regulatory system with PhoP	2	2	763403	643875	758698	387313	87.3814	44.6079	65.9947
phoP	16129093	3224	b1130	1188999	1189670	-	223	COG0745TK	P	DNA-binding response regulator in two-component regulatory system with PhoQ	8	8	6733303	7.56267e+06	6.70376e+06	7.71299e+06	772.091	888.327	830.209
PURB	16129094	3225	b1131	1189839	1191209	-	456	COG0015F	P	adenylosuccinate lyase	20	20	26323898	26845314	33868508	34443496	3900.73	3966.95	3933.84
hflD	16129095	3225	b1132	1191213	1191854	-	213	COG2915R	P	predicted lysogenization regulator	2	2	865782	721729	1.36642e+06	1.34356e+06	157.374	154.742	156.058
nudJ	16129097	3225	b1134	1193050	1193511	-	153	COG1051F	P	bifunctional thiamin pyrimidine pyrophosphate hydrolase/ thiamin pyrophosphate hydrolase	3	3	393375	629510	707095	878161	81.4381	101.14	91.2892
icd	16129099	1382814	b1136	1194346	1195596	+	416	COG0538C	P	e14 prophage; isocitrate dehydrogenase, specific for NADP+	25	25	210533616	229175696	168799344	183636736	19441.1	21150	20295.5
bluR	16129125	1382823	b1162	1212551	1213282	-	243	COG0789K	P	repressor of blue light-responsive genes	4	4	401572	471082	538608	585455	62.033	67.4285	64.7307
minE	16129137	3232	b1174	1223502	1223768	-	88	COG0851D	P	cell division topological specificity factor	4	4	1.77823e+06	2.08456e+06	3425815	3.40849e+06	394.561	392.566	393.563
minD	16129138	3232	b1175	1223772	1224584	-	270	COG2894D	P	membrane ATPase of the MinC-MinD-MinE system	11	11	12233223	11089133	16177343	15835348	1863.19	1823.8	1843.5
minC	16129139	3232	b1176	1224608	1225303	-	231	COG0850D	P	cell division inhibitor	1	1	2.39015e+06	2.24537e+06
pliG	16129141	1382827	b1178	1226294	1226695	-	133	-	P	predicted protein	8	8	10724195	6.46022e+06	10876337	6.50917e+06	1252.66	749.679	1001.17
ycgM	16129143	1382828	b1180	1227302	1227961	+	219	COG0179Q	P	predicted isomerase/hydrolase	2	2	284462	546710	250962	553850	28.904	63.7885	46.3462
nhaB	16129149	1382829	b1186	1232399	1233940	-	513	COG3067P	P	sodium:proton antiporter	4	4	3.25206e+06	2.89698e+06	3.23619e+06	2.92685e+06	372.721	337.094	354.907
fadR	16129150	1382830	b1187	1234161	1234880	+	239	COG2186K	P	DNA-binding transcriptional dual regulator of fatty acid metabolism	5	5	1.10644e+06	1.27582e+06	1.85683e+06	1.98419e+06	213.857	228.524	221.191
dadA	16129152	3234	b1189	1236794	1238092	+	432	COG0665E	P	D-amino acid dehydrogenase	9	9	71878248	64804616	61144260	11527496	7042.16	1327.65	4184.91
dadX	16129153	3234	b1190	1238102	1239172	+	356	COG0787M	P	alanine racemase 2, PLP-binding	2	2	702556	581269	999207	833355	115.081	95.9798	105.531
Ldca	16129155	1382832	b1192	1241389	1242303	-	304	COG1619V	P	L,D-carboxypeptidase A	5	5	971424	878303	824662	743258	94.9786	85.6031	90.2909
ycgR	16129157	1382833	b1194	1243016	1243750	-	244	COG5581M	P	flagellar velocity braking protein, c-di-GMP-regulated	8	8	16840312	16859874	19154286	19018762	2206.05	2190.44	2198.25
treA	16129160	1382836	b1197	1244902	1246599	-	565	COG1626G	P	periplasmic trehalase	7	7	649231	621935	638191	676495	73.5022	77.9138	75.708
dhaL	16129162	3235	b1199	1248348	1248980	-	210	COG2376G	C	dihydroxyacetone kinase, C-terminal domain	4	4	1.24028e+06	1.53883e+06	1.35557e+06	1.71606e+06	156.125	197.643	176.884
ychF	16129166	1382838	b1203	1255944	1257035	-	363	COG0012J	P	ATPase, K+-dependent, ribosome-associated	12	12	8095105	7668148	7851422	7.38072e+06	904.27	850.058	877.164
PTH	16129167	1382839	b1204	1257152	1257736	-	194	COG0193J	P	peptidyl-tRNA hydrolase	4	4	1923324	1.98117e+06	2.05031e+06	2132537	236.14	245.61	240.875
prs	16129170	1382841	b1207	1260151	1261098	-	315	COG0462FE	P	phosphoribosylpyrophosphate synthase	12	12	22012356	21503366	22648472	21837062	2608.49	2515.04	2561.76
ispE	16129171	3236	b1208	1261249	1262100	-	283	COG1947I	P	4-diphosphocytidyl-2-C-methylerythritol kinase	2	2	114681	108888	845242	474671	97.3489	54.6691	76.009
lolB	16129172	3236	b1209	1262100	1262723	-	207	COG3017M	P	OM lipoprotein required for localization of lipoproteins	9	10	5204935	5.0887e+06	4.52592e+06	4436395	521.263	510.952	516.107
hemA	16129173	3237	b1210	1262937	1264193	+	418	COG0373H	P	glutamyl tRNA reductase	3	3	90406.6	325573	28819.2	427788	3.31918	49.2695	26.2944
prfA	16129174	3237	b1211	1264235	1265317	+	360	COG0216J	P	peptide chain release factor RF-1	6	6	988541	1.44577e+06	665068	684367	76.5977	78.8205	77.7091
kdsA	16129178	3237	b1215	1267388	1268242	+	284	COG2877M	P	3-deoxy-D-manno-octulosonate 8-phosphate synthase	14	14	11842011	12285388	10162098	10518161	1170.4	1211.41	1190.9
chaA	16129179	1382842	b1216	1269972	1271072	-	366	COG0387P	P	calcium/sodium:proton antiporter	1	1	1.46541e+06	794907
ychN	16129182	1382844	b1219	1272469	1272822	-	117	COG1553P	P	conserved protein	4	4	3.58219e+06	3.36688e+06	3.65156e+06	3.5049e+06	420.56	403.669	412.115
narL	16129184	3238	b1221	1274402	1275052	-	216	COG2197TK	P	DNA-binding response regulator in two-component regulatory system with NarX (or NarQ)	6	6	4.49224e+06	4.1119e+06	3835477	3.47271e+06	441.743	399.962	420.852
purU	16129193	3240	b1232	1287005	1287847	-	280	COG0788F	P	formyltetrahydrofolate hydrolase	9	9	16705227	16889514	11243714	11425466	1294.97	1315.9	1305.44
rssB	16129196	1382846	b1235	1289465	1290478	+	337	COG2204T	P	response regulator binding RpoS to initiate proteolysis by ClpXP; required for the PcnB-degradosome interaction during stationary phase	1	1	788658	645515
galU	16129197	1382847	b1236	1290680	1291588	+	302	COG1210M	P	glucose-1-phosphate uridylyltransferase	11	11	22684984	21338746	15171290	14033934	1747.32	1616.33	1681.82
hns	16129198	1382848	b1237	1291732	1292145	-	137	COG2916R	P	global DNA-binding transcriptional dual regulator H-NS	9	8	92643560	94030328	76200744	81782920	8776.25	9419.17	9097.71
tdk	16129199	1382849	b1238	1292750	1293367	+	205	COG1435F	P	thymidine kinase/deoxyuridine kinase	4	4	1.18876e+06	1.12201e+06	1.1363e+06	1.35126e+06	130.871	155.628	143.25
adhE	16129202	1382850	b1241	1294669	1297344	-	891	COG1454C	P	fused acetaldehyde-CoA dehydrogenase/iron-dependent alcohol dehydrogenase/pyruvate-formate lyase deactivase	38	38	46889744	47590756	23356642	25417694	2690.05	2927.43	2808.74
oppA	16129204	3241	b1243	1299206	1300837	+	543	COG4166E	C	oligopeptide transporter subunit	28	28	48037144	43030876	46340548	41154504	5337.17	4739.88	5038.53
oppB	16129205	3241	b1244	1300923	1301843	+	306	COG0601EP	C	oligopeptide transporter subunit	2	2	750738	798231	824214	831667	94.927	95.7855	95.3562
oppC	16129206	3241	b1245	1301858	1302766	+	302	COG1173EP	C	oligopeptide transporter subunit	2	2	717855	625823	975240	965227	112.321	111.168	111.744
oppF	16129208	3241	b1247	1303788	1304792	+	334	COG4608E	C	oligopeptide transporter subunit	8	8	2.88678e+06	2.84843e+06	2.82952e+06	5666107	325.883	652.581	489.232
clsA	16129210	3242	b1249	1305209	1306669	-	486	COG1502I	P	cardiolipin synthase 1	7	7	2472936	1749209	2.5812e+06	1.73618e+06	297.284	199.961	248.622
kch	16129211	1382852	b1250	1307040	1308293	-	417	COG0569P	P	voltage-gated potassium channel	2	2	392019	259231	272871	204107	31.4273	23.5075	27.4674
tonB	16129213	1382853	b1252	1309113	1309832	+	239	COG0810M	P	membrane spanning protein in TonB-ExbB-ExbD transport complex	1	1	600425	909467
ompW	16129217	1382854	b1256	1312044	1312682	+	212	COG3047M	C	outer membrane protein W	1	1	44266.7	40457.2
trpA	16129221	3245	b1260	1314440	1315246	-	268	COG0159E	P	tryptophan synthase, alpha subunit	14	14	23508580	22191222	18642060	17764556	2147.06	2045.99	2096.53
trpB	16129222	3245	b1261	1315246	1316439	-	397	COG0133E	P	tryptophan synthase, beta subunit	17	17	18031284	14741292	17593226	14252305	2026.26	1641.48	1833.87
trpD	16129224	3245	b1263	1317813	1319408	-	531	COG0547E	P	fused glutamine amidotransferase (component II) of anthranilate synthase/anthranilate phosphoribosyl transferase	13	13	10059577	6784190	9274556	6.31886e+06	1068.18	727.761	897.969
trpE	16129225	3245	b1264	1319408	1320970	-	520	COG0147EH	P	component I of anthranilate synthase	20	20	25773384	19511922	22473928	17005588	2588.39	1958.58	2273.48
rluB	16129230	1382855	b1269	1324876	1325751	+	291	COG1187J	P	23S rRNA pseudouridylate synthase	9	9	6.04075e+06	6302849	6014363	6.29998e+06	692.691	725.587	709.139
btuR	16129231	3247	b1270	1325791	1326381	-	196	COG2109H	P	cob(I)alamin adenolsyltransferase/cobinamide ATP-dependent adenolsyltransferase	2	2	530629	548906	451007	512353	51.9437	59.0091	55.4764
yciK	16129232	3247	b1271	1326378	1327136	-	252	COG1028IQR	P	predicted oxoacyl-(acyl carrier protein) reductase, EmrKY-TolC system	5	5	1.23613e+06	1.24068e+06	1.20265e+06	1.22081e+06	138.513	140.605	139.559
sohB	16129233	1382856	b1272	1327356	1328405	+	349	COG0616OU	P	predicted inner membrane peptidase; multicopy suppressor of htrA(degP)	12	12	4.16835e+06	3.35393e+06	3.93559e+06	3.16749e+06	453.273	364.809	409.041
yciN	16129234	1382857	b1273	1328441	1328692	-	83	-	P	DUF2498 protein YciN	1	1	302475	297499
topA	16129235	1382858	b1274	1329072	1331669	+	865	COG0550L	P	DNA topoisomerase I, omega subunit	23	23	5400428	4836095	4.0205e+06	4001545	463.053	460.869	461.961
cysB	16129236	1382859	b1275	1331879	1332853	+	324	COG0583K	P	DNA-binding transcriptional dual regulator, O-acetyl-L-serine-binding	11	11	4925716	5096728	3.68871e+06	3.45313e+06	424.839	397.707	411.273
acnA	16129237	1382860	b1276	1333855	1336530	+	891	COG1048C	P	aconitate hydratase 1	15	15	2.97818e+06	2.79254e+06	2.86614e+06	2123514	330.101	244.571	287.336
ribA	16129238	1382861	b1277	1336594	1337184	-	196	COG0807H	P	GTP cyclohydrolase II	2	2	361042	372520	404518	446028	46.5894	51.3703	48.9799
yciS	16129240	3249	b1279	1338267	1338575	+	102	COG3771S	P	inner membrane DUF1049 protein YciS	2	2	492151	379786	577174	346681	66.4747	39.9283	53.2015
yciM	16129241	3249	b1280	1338582	1339751	+	389	COG2956G	P	TPR-repeats-containing protein	4	4	645298	608424	510121	458291	58.7521	52.7827	55.7674
pyrF	16129242	3250	b1281	1339945	1340682	+	245	COG0284F	P	orotidine-5'-phosphate decarboxylase	7	7	5505315	5.94844e+06	5698508	6.07658e+06	656.313	699.857	678.085
yciT	16129245	1382864	b1284	1341621	1342370	-	249	COG1349KG	P	global regulator of transcription; DeoR family	6	6	1278492	1.35536e+06	964348	1.05292e+06	111.067	121.268	116.167
rnb	16129247	3251	b1286	1345002	1346936	-	644	COG4776K	P	ribonuclease II	24	24	12691060	12302321	10459135	10208745	1204.61	1175.77	1190.19
fabI	16129249	1382866	b1288	1348275	1349063	-	262	COG0623I	P	enoyl-[acyl-carrier-protein] reductase, NADH-dependent	11	11	51877304	53736780	41353056	44190636	4762.75	5089.56	4926.15
sapA	16129255	3252	b1294	1353491	1355134	-	547	COG4166E	C	antimicrobial peptide transport ABC transporter periplasmic binding protein	2	2	561890	379554	505136	555159	58.1779	63.9392	61.0586
puuR	16129260	3253	b1299	1359935	1360492	+	185	COG1396K	P	DNA-binding transcriptional repressor for the puu divergon	1	1	437701	444756
puuC	16129261	3254	b1300	1360767	1362254	+	495	COG1012C	P	gamma-Glu-gamma-aminobutyraldehyde dehydrogenase, NAD(P)H-dependent	2	2	510806	760536	523492	740797	60.292	85.3197	72.8059
puuB	16129262	3254	b1301	1362256	1363536	+	426	COG0665E	P	gamma-Glu-putrescine oxidase, FAD/NAD(P)-binding	3	3	533346	392708	123774	258744	14.2554	29.8003	22.0279
puuE	16129263	3254	b1302	1363574	1364839	+	421	COG0160E	P	GABA aminotransferase, PLP-dependent	3	3	602839	692276	553444	770426	63.7417	88.7322	76.2369
pspA	16129265	3255	b1304	1366103	1366771	+	222	COG1842KT	P	regulatory protein for phage-shock-protein operon	5	5	2763629	2.50587e+06	2.41379e+06	2.088e+06	278.003	240.481	259.242
pspB	16129266	3255	b1305	1366825	1367049	+	74	-	P	DNA-binding transcriptional regulator of psp operon	2	2	1.3054e+06	780337	1.32995e+06	765600	153.174	88.1763	120.675
ycjW	16129281	1382869	b1320	1380987	1381985	-	332	COG1609K	P	predicted DNA-binding transcriptional regulator	1	1	142966	94891.8
ycjX	16129282	3257	b1321	1382141	1383538	+	465	COG3106R	P	conserved protein with nucleoside triphosphate hydrolase domain	4	4	506546	445979	833647	513105	96.0135	59.0957	77.5546
ycjF	16129283	3257	b1322	1383535	1384596	+	353	COG3768S	P	inner membrane protein, UPF0283 family	1	1	457702	382181
tyrR	16129284	1382870	b1323	1384744	1386285	+	513	COG3283KE	P	DNA-binding transcriptional dual regulator, tyrosine-binding	11	11	1.595e+06	1.53328e+06	1.37465e+06	1.46075e+06	158.323	168.239	163.281
tpx	16129285	1382871	b1324	1386329	1386835	-	168	COG2077O	P	lipid hydroperoxide peroxidase	6	6	59868548	65974544	59493664	63506744	6852.05	7314.25	7083.15
uspE	16129294	1382876	b1333	1395696	1396646	-	316	COG0589T	P	stress-induced protein	7	7	2.78308e+06	3.18958e+06	2.54515e+06	2982792	293.132	343.537	318.334
fnr	16129295	1382877	b1334	1396798	1397550	-	250	COG0664T	P	DNA-binding transcriptional dual regulator, global regulator of anaerobic growth	2	2	1.35183e+06	1.35193e+06	3.23192e+06	3.44676e+06	372.229	396.973	384.601
ydaN	16129303	1382880	b1342	1406074	1407057	+	327	COG0598P	P	predicted Zn(II) transporter	1	1	641382	558715
ttcA	16129305	3259	b1344	1409037	1409972	-	311	COG0037D	P	tRNA 2-thiocytidine biosynthesis protein	6	6	1772984	1.83233e+06	1.66498e+06	1.81099e+06	191.761	208.576	200.168
racR	16129317	1382882	b1356	1417789	1418265	-	158	-	P	Rac prophage; predicted DNA-binding transcriptional regulator	1		680917	561604	928246	754094	106.909	86.8511	96.8799
pfo	16129339	1382888	b1378	1435284	1438808	-	1174	COG0674C	P	fused predicted pyruvate-flavodoxin oxidoreductase: conserved protein/conserved protein/FeS binding protein	8	8	1.40495e+06	1.17346e+06	1.25726e+06	1.12027e+06	144.802	129.025	136.913
hslJ	16129340	1382889	b1379	1439345	1439767	-	140	COG3187O	P	heat-inducible lipoprotein involved in novobiocin resistance	3	3	349497	186474	990936	182598	114.129	21.0303	67.5796
LDHA	16129341	1382890	b1380	1439878	1440867	-	329	COG1052CHR	P	fermentative D-lactate dehydrogenase, NAD-dependent	9	9	8712441	5572387	8794059	5.73554e+06	1012.84	660.578	836.707
ydbH	16129342	3266	b1381	1441075	1443714	+	879	-	P	predicted protein	1	1	182255	203071
ydbC	16129367	1382894	b1406	1472245	1473105	+	286	COG0667C	P	predicted oxidoreductase, NAD(P)-binding	3	3	652422	723844	646923	718006	74.508	82.6948	78.6014
azoR	16129373	1382895	b1412	1480279	1480884	-	201	COG1182I	P	NADH-azoreductase, FMN-dependent	6	6	3.43264e+06	3.13925e+06	3.22295e+06	3.21368e+06	371.197	370.128	370.662
ydcF	16129375	1382896	b1414	1485259	1486059	+	266	COG1434S	P	conserved SAM-binding protein, DUF218 superfamily	5	5	1758283	1551867	2.00338e+06	1.57602e+06	230.735	181.515	206.125
aldA	16129376	1382897	b1415	1486256	1487695	+	479	COG1012C	P	aldehyde dehydrogenase A, NAD-linked	20	20	21882422	26096082	15638849	18526636	1801.17	2133.76	1967.47
trg	16129380	1382899	b1421	1490494	1492134	+	546	COG0840NT	C	methyl-accepting chemotaxis protein III, ribose and galactose sensor receptor	13	13	3.22958e+06	2.57577e+06	3748455	3708558	431.72	427.125	429.423
rimL	16129386	1382901	b1427	1496962	1497501	+	179	COG1670J	P	ribosomal-protein-L7/L12-serine acetyltransferase	4	3	287953	290687	365625	226374	42.1101	26.0721	34.0911
tehB	16129389	3272	b1430	1499586	1500179	+	197	COG2813J	P	tellurite resistance protein, SAM-dependent; predicted S-adenosyl-L-methionine-dependent methyltransferase	7	7	4347782	5402615	4144366	4.91959e+06	477.318	566.603	521.961
ydcL	16129390	1382903	b1431	1500481	1501149	+	222	-	P	lipoprotein	8	8	3556207	2.85304e+06	4.43258e+06	3.52515e+06	510.512	406.001	458.257
ydcS	16129399	3274	b1440	1509678	1510823	+	381	COG0687E	C	polyhydroxybutyrate (PHB) synthase, ABC transporter periplasmic binding protein homolog	1	1	51612	186025
patD	16129403	3274	b1444	1513602	1515026	+	474	COG1012C	C	gamma-aminobutyraldehyde dehydrogenase	1	1	404800	479577
yncD	16129410	1382908	b1451	1518987	1521089	-	700	COG1629P	P	predicted iron outer membrane transporter	5	5	180475	177499	650142	178283	74.8786	20.5334	47.706
yncE	16129411	1382909	b1452	1521331	1522392	+	353	COG3391S	P	ATP-binding protein, periplasmic, function unknown	17	17	59018668	62920560	66237920	67453584	7628.81	7768.82	7698.81
pptA	16129420	1382912	b1461	1531076	1531309	+	77	COG1942R	P	4-oxalocrotonate tautomerase	1	1	838008	786719
yddE	16129423	3277	b1464	1532989	1533882	-	297	COG0384R	C	conserved predicted enzyme, PhzC-PhzF family	3	3	308434	279616	1.82916e+06	1.25018e+06	210.669	143.986	177.328
sra	16129439	1382915	b1480	1553850	1553987	-	45	-	P	Stationary-phase-induced ribosome-associated protein	2	2	8826946	9037278	8811307	8595817	1014.82	990.004	1002.41
osmC	16129441	1382916	b1482	1554649	1555080	+	143	COG1764O	P	Lipoyl-dependent Cys-based peroxidase, hydroperoxide resistance; salt-shock inducible membrane protein; peroxiredoxin	5	5	5903657	6.3475e+06	5.68033e+06	6118710	654.219	704.709	679.464
ddpA	16129446	3279	b1487	1558955	1560505	-	516	COG0747E	C	D-ala-D-a la transporter subunit	1	1	372687	242800
GADC	16129451	1382918	b1492	1566978	1568513	-	511	COG0531E	P	predicted glutamate:gamma-aminobutyric acid antiporter	1	1	287236	273722
gadB	16129452	1382919	b1493	1568669	1570069	-	466	COG0076E	P	glutamate decarboxylase B, PLP-dependent	2	2	1.35318e+06	1.08155e+06	548469	399718	63.1687	46.0366	54.6026
pqqL	16129453	3281	b1494	1570431	1573226	-	931	COG0612R	P	predicted peptidase	17	17	1.45078e+06	1.47076e+06	1.29983e+06	1.36286e+06	149.706	156.965	153.335
yddB	16129454	3281	b1495	1573271	1575643	-	790	COG1629P	P	predicted porin protein	9	9	583372	433002	538989	588102	62.0768	67.7334	64.9051
yddA	16129455	3281	b1496	1575681	1577366	-	561	COG4178R	P	fused predicted multidrug transporter subunits of ABC superfamily: membrane component/ATP-binding component	3	3	35502.9	26279.1	211153	140178	24.3191	16.1447	20.2319
glsB	16129483	3286	b1524	1610349	1611275	-	308	COG2066E	P	glutaminase	2	2	576134	300552	1.91439e+06	2.1565e+06	220.486	248.37	234.428
dcp	16129497	1382933	b1538	1623359	1625404	-	681	COG0339E	P	dipeptidyl carboxypeptidase II	15	15	4902431	4.81568e+06	4.87135e+06	4.70759e+06	561.047	542.186	551.617
ydfG	16129498	1382934	b1539	1625541	1626287	+	248	COG4221R	P	Malonic semialdehyde reductase, NADPH-dependent; L-allo-threonine dehydrogenase, NAD(P)-dependent; also oxidizes L-serine, D-serine, D-threonine and 3-hydroxyisobutyrate	8	8	7574589	8459547	10812635	11629234	1245.32	1339.37	1292.35
rspR	16129499	1382935	b1540	1626376	1627062	+	228	COG1802K	P	predicted DNA-binding transcriptional regulator	3	3	605041	258479	671794	527636	77.3724	60.7694	69.0709
RELB	16129523	3293	b1564	1643657	1643896	-	79	COG3077L	C	Qin prophage; bifunctional antitoxin of the RelE-RelB toxin-antitoxin system/ transcriptional repressor	1	1	2.78387e+06	2304897
ynfB	16129541	3297	b1583	1653832	1654173	+	113	-	P	predicted protein	3	3	1410674	1.64925e+06	1.41738e+06	1.64094e+06	163.244	188.992	176.118
SPEG	16129542	3297	b1584	1654208	1654768	+	186	COG1670J	P	spermidine N1-acetyltransferase	5	5	1.0923e+06	1.06579e+06	948248	936311	109.212	107.838	108.525
MLC	16129552	1382949	b1594	1665368	1666588	-	406	COG1940KG	P	Global DNA-binding transcriptional repressor; autorepressor; required for anaerobic growth on glucosamine	1	1	315607	286718
ydgD	16129556	3299	b1598	1669984	1670805	+	273	COG3591E	P	predicted peptidase	1	1	120368
pntB	16129560	3301	b1602	1672996	1674384	-	462	COG1282C	C	pyridine nucleotide transhydrogenase, beta subunit	11	11	28004114	23404492	25389304	20831740	2924.16	2399.25	2661.7
pntA	16129561	3301	b1603	1674395	1675927	-	510	COG3288C	C	pyridine nucleotide transhydrogenase, alpha subunit	21	21	43087472	40021524	38417088	35433924	4424.6	4081.02	4252.81
ydgH	16129562	1382953	b1604	1676451	1677395	+	314	-	P	predicted protein	17	16	21697418	20714320	17867360	16875216	2057.83	1943.57	2000.7
folM	16129564	3302	b1606	1679000	1679722	+	240	COG1028IQR	P	dihydromonapterin reductase, NADPH-dependent; dihydrofolate reductase isozyme	1	1	3929128	3.03366e+06
rstB	16129567	3303	b1609	1680906	1682207	+	433	COG0642T	P	sensory histidine kinase in two-component regulatory system with RstA	1	1	97163.6	71116.5
fumC	16129569	1382955	b1611	1683209	1684612	-	467	COG0114C	P	fumarate hydratase (fumarase C),aerobic Class II	11	11	3.62977e+06	3.82182e+06	3622438	3.73777e+06	417.206	430.489	423.848
fumA	16129570	1382956	b1612	1684755	1686401	-	548	COG1951C	P	fumarate hydratase (fumarase A), aerobic Class I	8	8	8.1434e+06	8451968	7.86994e+06	8.03218e+06	906.403	925.089	915.746
ydgA	16129572	1382957	b1614	1687876	1689384	+	502	COG5339S	P	conserved protein, DUF945 family	22	22	7.42044e+06	6.85083e+06	5.92194e+06	5316102	682.046	612.27	647.158
uidR	16129576	1382958	b1618	1694486	1695076	-	196	COG1309K	P	DNA-binding transcriptional repressor	1	1	174377	303058
hdhA	16129577	1382959	b1619	1695297	1696064	-	255	COG1028IQR	P	7-alpha-hydroxysteroid dehydrogenase, NAD-dependent	3	3	603903	590970	2.2702e+06	1.72532e+06	261.465	198.709	230.087
malY	16129580	3305	b1622	1698981	1700153	+	390	COG1168E	C	bifunctional beta-cystathionase, PLP-dependent/ regulator of maltose regulon	2	2	398563	397397	506031	521868	58.281	60.105	59.193
ADD	16129581	1382961	b1623	1700257	1701258	+	333	COG1816F	P	adenosine deaminase	2	2	1.41968e+06	1.37198e+06	1.11743e+06	1.13325e+06	128.697	130.52	129.609
rsxB	16129586	3306	b1628	1704372	1704950	+	192	COG2878C	P	electron transport complex protein, iron-sulfur protein, required for the reduction of SoxR	1	1	452229	481314
rsxC	16129587	3306	b1629	1704943	1707165	+	740	COG4656C	P	electron transport complex protein required for the reduction of SoxR; predicted membrane-associated NADH oxidoreductase	6	6	369075	300110	407856	342889	46.974	39.4915	43.2327
rsxG	16129589	3306	b1631	1708228	1708848	+	206	COG4659C	P	electron transport complex protein required for the reduction of SoxR	2	2	201602	171359	201806	167878	23.2426	19.3349	21.2887
gsta	16129593	1382964	b1635	1712401	1713006	+	201	COG0625O	P	glutathionine S-transferase	8	8	2571461	2.90997e+06	3.32024e+06	3505920	382.401	403.787	393.094
pdxY	16129594	3307	b1636	1713050	1713913	-	287	COG2240H	P	pyridoxamine kinase	3	3	390583	516741	894717	992962	103.047	114.362	108.705
tyrS	16129595	3307	b1637	1713972	1715246	-	424	COG0162J	P	tyrosyl-tRNA synthetase	14	14	14087865	10951518	12480120	9843011	1437.37	1133.65	1285.51
pdxH	16129596	1382965	b1638	1715375	1716031	-	218	COG0259H	P	pyridoxine 5'-phosphate oxidase	8	8	4.44559e+06	3.5993e+06	4204012	3176847	484.188	365.886	425.037
anmK	16129598	1382966	b1640	1716517	1717626	-	369	COG2377O	P	anhydro-N-acetylmuramic acid kinase	4	4	707112	738939	1.13141e+06	1229336	130.308	141.586	135.947
nemA	16129608	3310	b1650	1724683	1725780	+	365	COG1902C	P	N-ethylmaleimide reductase, FMN-linked	13	13	2158958	2.64268e+06	2.17748e+06	2.61976e+06	250.787	301.725	276.256
gloA	16129609	3310	b1651	1725861	1726268	+	135	COG0346E	P	glyoxalase I, Ni-dependent	2	2	2448909	2.62634e+06	2.02867e+06	2.05178e+06	233.647	236.309	234.978
rnt	16129610	1382967	b1652	1726371	1727018	+	215	COG0847L	P	ribonuclease T (RNase T)	2	2	305100	481261	588083	547452	67.7312	63.0516	65.3914
grxD	16129612	1382969	b1654	1731778	1732125	-	115	COG0278O	P	glutaredoxin-4	5	5	7972303	7.41368e+06	6111613	6038866	703.892	695.513	699.702
sodB	16129614	1382971	b1656	1733402	1733983	+	193	COG0605P	P	superoxide dismutase, Fe	7	7	14243992	15136042	17222094	19898244	1983.52	2291.74	2137.63
purR	16129616	1382973	b1658	1735868	1736893	+	341	COG1609K	P	DNA-binding transcriptional repressor, hypoxanthine-binding	13	13	5.05416e+06	4900868	6.66821e+06	6026401	767.996	694.078	731.037
cfa	16129619	1382975	b1661	1739437	1740585	+	382	COG2230M	P	cyclopropane fatty acyl phospholipid synthase (unsaturated-phospholipid methyltransferase)	11	11	1.92553e+06	1.81687e+06	1.33344e+06	1.29895e+06	153.576	149.604	151.59
ribC	16129620	1382976	b1662	1740625	1741266	-	213	COG0307H	P	riboflavin synthase, alpha subunit	9	9	5.1548e+06	4575819	4387894	3.75054e+06	505.366	431.96	468.663
ydhQ	16129622	1382977	b1664	1742895	1744151	-	418	COG3468MU	P	conserved protein	6	6	1.196e+06	1123849	1.50707e+06	1.38194e+06	173.573	159.162	166.368
ydhR	16129623	1382978	b1667	1744724	1745029	+	101	-	P	predicted monooxygenase	3	3	821780	473037	1.16017e+06	621511	133.621	71.5812	102.601
ydhS	16129624	1382979	b1668	1745155	1746759	+	534	COG4529S	P	conserved protein with FAD/NAD(P)-binding domain	3	3	346567	381698	617863	512077	71.161	58.9773	65.0692
ydhZ	16129631	1382980	b1675	1752956	1753165	-	69	-	P	predicted protein	1	1	107378	139972
pykF	16129632	1382981	b1676	1753722	1755134	+	470	COG0469G	P	pyruvate kinase I	32	32	34216216	34065764	31429234	31129692	3619.79	3585.29	3602.54
LPP	16129633	1382982	b1677	1755445	1755681	+	78	COG4238M	P	murein lipoprotein	3	3	44074372	60130424	69325088	94067744	7984.37	10834	9409.21
ldtE	16129634	1382983	b1678	1755745	1756749	-	334	COG1376S	P	murein L,D-transpeptidase	3	3	867372	681810	1266074	947891	145.817	109.171	127.494
sufE	16129635	3312	b1679	1756898	1757314	-	138	COG2166R	P	sulfur acceptor protein	4	4	2.23671e+06	2527981	2147333	2.48674e+06	247.314	286.405	266.86
sufS	16129636	3312	b1680	1757327	1758547	-	406	COG0520E	P	cysteine desulfurase, stimulated by SufE; selenocysteine lyase, PLP-dependent	9	9	3.31626e+06	3.49271e+06	3.03756e+06	2855893	349.845	328.921	339.383
sufD	16129637	3312	b1681	1758544	1759815	-	423	COG0719O	P	FeS cluster assembly protein of SufBCD complex	10	10	3536533	3.48762e+06	3.87363e+06	3374780	446.137	388.683	417.41
sufC	16129638	3312	b1682	1759790	1760536	-	248	COG0396O	P	component of SufBCD complex, ATP-binding component of ABC superfamily	12	12	9846567	8324438	7.99002e+06	6.74083e+06	920.233	776.36	848.297
sufA	16129640	3312	b1684	1762042	1762410	-	122	COG0316S	P	Fe-S cluster assembly protein	3	3	491335	791731	712604	783986	82.0727	90.2938	86.1832
menI	16129642	3313	b1686	1763246	1763656	-	136	COG2050Q	P	acyl-CoA esterase in vitro	2	2	870086	993394	827648	964962	95.3226	111.137	103.23
ydiJ	16129643	3313	b1687	1763653	1766709	-	1018	COG0277C	P	predicted FAD-linked oxidoreductase	22	22	13534837	11426415	13498901	10310418	1554.71	1187.48	1371.09
ydiK	16129644	1382984	b1688	1767098	1768210	+	370	COG0628R	P	inner membrane protein, UPF0118 family	2	2	437837	207554	423898	327657	48.8215	37.7372	43.2793
aroD	16129649	3314	b1693	1772710	1773468	+	252	COG0710E	P	3-dehydroquinate dehydratase	8	8	3.38264e+06	3.14621e+06	3.23839e+06	3.01716e+06	372.975	347.494	360.234
ppsA	16129658	1382987	b1702	1782758	1785136	-	792	COG0574G	P	phosphoenolpyruvate synthase	20	20	7.28481e+06	6.68256e+06	8930954	9349473	1028.6	1076.81	1052.7
ppsR	16129659	1382988	b1703	1785469	1786302	+	277	COG1806S	P	bifunctional regulatory protein: PEP synthase kinase and PEP synthase pyrophosphorylase	5	5	2.36546e+06	2349082	2.26739e+06	2.21655e+06	261.142	255.287	258.214
aroH	16129660	1382989	b1704	1786459	1787505	+	348	COG0722E	P	3-deoxy-D-arabino-heptulosonate-7-phosphate synthase, tryptophan repressible	9	9	6608009	6.06633e+06	6.64308e+06	6.12113e+06	765.103	704.987	735.045
ydiE	16129661	1382990	b1705	1787637	1787828	+	63	COG4256P	P	hemin uptake protein HemP homolog	2	2	80993.7	242861	46507.4	171763	5.35639	19.7824	12.5694
ydiU	16129662	3317	b1706	1787832	1789268	-	478	COG0397S	P	conserved protein, UPF0061 family	4	4	238126	219419	676397	675227	77.9025	77.7678	77.8352
nlpC	16129664	3318	b1708	1790291	1790755	-	154	COG0791M	P	predicted peptidase, C40 clan, lipoprotein	1	1	79237.9	100812
btuE	16129666	3318	b1710	1791582	1792133	-	183	COG0386O	P	glutathione peroxidase	6	6	3.60952e+06	3.36443e+06	2.28068e+06	1.99177e+06	262.672	229.398	246.035
ihfA	16129668	3319	b1712	1793277	1793576	-	99	COG0776L	P	integration host factor (IHF), DNA-binding protein, alpha subunit	8	8	29205718	31377512	29044700	31560676	3345.16	3634.93	3490.05
pheT	16129669	3319	b1713	1793581	1795968	-	795	COG0072J	P	phenylalanine tRNA synthetase, beta subunit	30	30	32130516	29187302	23402132	21046982	2695.29	2424.04	2559.66
pheS	16129670	3319	b1714	1795983	1796966	-	327	COG0016J	P	phenylalanine tRNA synthetase, alpha subunit	18	18	16498110	16684148	16558378	16625682	1907.07	1914.83	1910.95
rplT	16129672	3320	b1716	1797417	1797773	-	118	COG0292J	P	50S ribosomal subunit protein L20	6	6	118956760	124447688	80330040	84205528	9251.84	9698.19	9475.01
infC	16129674	3321	b1718	1798120	1798662	-	180	COG0290J	P	protein chain initiation factor IF-3	9	9	16569256	15512420	17420572	16104294	2006.38	1854.78	1930.58
thrS	16129675	3321	b1719	1798666	1800594	-	642	COG0441J	P	threonyl-tRNA synthetase	27	27	18994850	18127092	20738452	19885584	2388.51	2290.28	2339.39
ydiZ	16129678	1382992	b1724	1805424	1805714	+	96	-	P	predicted protein	1	1	1.32255e+06	499724
yniA	16129679	1382993	b1725	1805820	1806680	+	286	COG3001G	P	predicted phosphotransferase/kinase	1	1	63323.6	186136
yniB	16129680	1382994	b1726	1806721	1807257	-	178	-	P	predicted inner membrane protein	2	2	282123	159596	279697	153081	32.2135	17.6307	24.9221
yniC	16129681	1382995	b1727	1807404	1808072	+	222	COG0637R	P	2-deoxyglucose-6-P phosphatase	5	5	3.21275e+06	3.54265e+06	3093283	3.65217e+06	356.262	420.631	388.447
ydjN	16129683	1382996	b1729	1808958	1810349	+	463	COG1823R	P	predicted transporter	7	7	18121280	16413745	12644750	11284969	1456.33	1299.72	1378.03
chbB	16129692	1382997	b1738	1819323	1819643	-	106	COG1440G	C	N,N'-diacetylchitobiose-specific enzyme IIB component of PTS	2	2	119175	227945	134284	173431	15.4658	19.9746	17.7202
osmE	16129693	1382998	b1739	1819942	1820280	-	112	COG2913J	P	DNA-binding transcriptional activator	3	3	21120686	16267857	21820146	16096585	2513.09	1853.89	2183.49
nadE	16129694	1382999	b1740	1820482	1821309	+	275	COG0171H	P	NAD synthetase, NH3/glutamine-dependent	16	16	13571030	13142613	13579476	13060061	1563.99	1504.16	1534.08
spy	16129697	1383001	b1743	1823164	1823649	-	161	COG3678UNTP	P	periplasmic ATP-independent protein refolding chaperone, stress-induced	2	2	144370	130878	921380	821130	106.118	94.5718	100.345
astC	16129702	3324	b1748	1828786	1830006	-	406	COG4992E	P	succinylornithine transaminase, PLP-dependent	2	2	8445485	6029154	213335	155014	24.5704	17.8534	21.2119
xthA	16129703	1383002	b1749	1830452	1831258	+	268	COG0708L	P	exonuclease III	8	8	3.07969e+06	3400749	3.03898e+06	3.32563e+06	350.008	383.022	366.515
gdhA	16129715	1383005	b1761	1840395	1841738	+	447	COG0334E	P	glutamate dehydrogenase, NADP-specific	25	25	83082032	79906144	55440460	54089868	6385.23	6229.68	6307.46
topB	16129717	3326	b1763	1843023	1844984	-	653	COG0550L	P	DNA topoisomerase III	4	4	263379	294416	355255	328187	40.9157	37.7982	39.357
selD	16129718	3326	b1764	1844989	1846032	-	347	COG0709E	P	selenophosphate synthase	7	7	6923173	6.51347e+06	6702349	6.31201e+06	771.928	726.971	749.45
ydjA	16129719	1383006	b1765	1846149	1846700	-	183	COG0778C	P	predicted oxidoreductase	7	7	5459191	6.84156e+06	6.01808e+06	7543544	693.119	868.811	780.965
sppA	16129720	1383007	b1766	1846861	1848717	+	618	COG0616OU	P	protease IV (signal peptide peptidase)	7	7	1.38968e+06	1.29872e+06	1.38244e+06	1.28534e+06	159.219	148.036	153.628
ansA	16129721	3327	b1767	1848884	1849900	+	338	COG0252EJ	P	cytoplasmic L-asparaginase I	2	2	685564	754705	3.04825e+06	2726400	351.076	314.007	332.542
gapA	16129733	1383010	b1779	1860795	1861790	+	331	COG0057G	P	glyceraldehyde-3-phosphate dehydrogenase A	22	22	173846096	243856016	138114928	178759632	15907.1	20588.2	18247.7
mipA	16129736	1383012	b1782	1863750	1864496	-	248	COG3713M	P	scaffolding protein for murein synthesizing machinery	4	4	9595726	7.16979e+06	9592440	7.12592e+06	1104.79	820.712	962.75
yeaG	16129737	3330	b1783	1864932	1866866	+	644	COG2766T	P	protein kinase, function unknown; autokinase	18	18	5245752	4.81108e+06	4.01007e+06	3.53527e+06	461.851	407.167	434.509
yeaK	16129741	3331	b1787	1871598	1872101	+	167	COG2606S	P	conserved protein	2	2	256798	253144	141064	83531.6	16.2468	9.62057	12.9337
yoaF	16129747	1383016	b1793	1875302	1875556	-	84	COG3042R	P	conserved outer membrane lipoprotein	1	1	431335	447684
rnD	16129758	3336	b1804	1884888	1886015	-	375	COG0349J	P	ribonuclease D	4	4	384330	494915	607735	782317	69.9945	90.1017	80.0481
FADD	16129759	3336	b1805	1886085	1887770	-	561	COG0318IQ	P	acyl-CoA synthetase (long-chain-fatty-acid--CoA ligase)	5	5	473128	436115	241723	282086	27.8399	32.4886	30.1643
yeaY	16129760	3337	b1806	1887975	1888556	-	193	COG3065M	P	lipoprotein, RpoE-regulated, fucntion unknown	3	3	1.58944e+06	1.39172e+06	1450930	1.28283e+06	167.108	147.747	157.427
tsaB	16129761	3337	b1807	1888596	1889291	-	231	COG1214O	P	protease specific for Gcp(YgjD), essential for nucleoid maintanence	2	2	948875	1.01995e+06	973831	1.01232e+06	112.159	116.592	114.375
pabB	16129766	3338	b1812	1892829	1894190	+	453	COG0147EH	P	aminodeoxychorismate synthase, subunit I	2	2	557405	217278	564166	247622	64.9765	28.5194	46.748
nudL	16129767	3338	b1813	1894194	1894772	+	192	-	P	predicted NUDIX hydrolase	1	1	456305	382778
sdaA	16129768	1383021	b1814	1894956	1896320	+	454	COG1760E	P	L-serine deaminase I	1	1	316261	221686
manX	16129771	3339	b1817	1900072	1901043	+	323	COG3444G	P	fused mannose-specific PTS enzymes: IIA component/IIB component	11	11	15570494	16013991	12712713	14153408	1464.16	1630.09	1547.12
manY	16129772	3339	b1818	1901106	1901906	+	266	COG3715G	P	mannose-specific enzyme IIC component of PTS	2	2	1367768	958387	1574068	1.04882e+06	181.29	120.796	151.043
cspC	16129777	3340	b1823	1905250	1905459	-	69	COG1278K	P	stress protein, member of the CspA-family	3	3	77456472	84851400	66920064	73629896	7707.37	8480.16	8093.77
yebO	16129779	1383024	b1825	1906285	1906572	-	95	-	P	predicted inner membrane protein	1	1	345922	233951
kdgR	16129781	1383026	b1827	1907332	1908123	-	263	COG1414K	P	DNA-binding transcriptional regulator f kdgK, kdgT, eda	9	9	5985961	5456966	6336987	5645415	729.849	650.198	690.023
htpX	16129783	1383027	b1829	1909719	1910600	-	293	COG0501O	P	predicted endopeptidase	5	5	2.66447e+06	2326267	2.47798e+06	2.20396e+06	285.396	253.837	269.616
prc	16129784	3341	b1830	1910792	1912840	-	682	COG0793M	P	carboxy-terminal protease for penicillin-binding protein 3	18	18	4.98544e+06	4.77278e+06	4.19156e+06	15584295	482.753	1794.89	1138.82
yebY	16129792	3344	b1839	1921389	1921730	-	113	-	P	predicted protein	2	2	1067290	1246342	1.06533e+06	1.24349e+06	122.698	143.216	132.957
holE	16129795	1383028	b1842	1923132	1923362	+	76	-	C	DNA polymerase III, theta subunit	1	1	21419.7	31129
exoX	16129797	3345	b1844	1924144	1924806	+	220	COG0847L	P	DNA exonuclease X	3	2	684142	422679	674335	682682	77.6651	78.6264	78.1457
ptrB	16129798	1383029	b1845	1924803	1926863	-	686	COG1770E	P	protease II	3	3	297144	282350	345241	365490	39.7624	42.0945	40.9284
yebE	16129799	1383030	b1846	1927072	1927731	-	219	COG2979S	P	inner membrane protein, DUF533 family	2	2	69966.6	81308.5	343993	160139	39.6186	18.4437	29.0311
yebG	16129801	3346	b1848	1928481	1928771	-	96	COG3141S	P	conserved protein regulated by LexA	2	2	426958	384954	492441	366850	56.7158	42.2511	49.4835
purT	16129802	1383031	b1849	1928905	1930083	+	392	COG0027F	P	phosphoribosylglycinamide formyltransferase 2	14	14	17489982	15841192	16689221	15109965	1922.14	1740.26	1831.2
EDA	16129803	3347	b1850	1930139	1930780	-	213	COG0800G	P	multifunctional 2-keto-3-deoxygluconate 6-phosphate aldolase and 2-keto-4-hydroxyglutarate aldolase and oxaloacetate decarboxylase	8	8	22476672	21879450	22649330	22223880	2608.59	2559.59	2584.09
edd	16129804	3347	b1851	1930817	1932628	-	603	COG0129EG	P	6-phosphogluconate dehydratase	8	8	1.2702e+06	1.22002e+06	957367	1118512	110.263	128.822	119.542
zwf	16129805	1383032	b1852	1932863	1934338	-	491	COG0364G	P	glucose-6-phosphate 1-dehydrogenase	22	21	22306104	19135268	15508778	13719993	1786.19	1580.17	1683.18
yebK	16129806	1383033	b1853	1934676	1935545	+	289	COG1737K	P	predicted DNA-binding transcriptional regulator	3	3	139971	180166	185020	242206	21.3093	27.8955	24.6024
pykA	16129807	1383034	b1854	1935673	1937115	+	480	COG0469G	P	pyruvate kinase II	21	21	14108048	13542610	11644399	11192034	1341.12	1289.02	1315.07
lpxM	16129808	1383035	b1855	1937246	1938217	-	323	COG1560M	P	myristoyl-acyl carrier protein (ACP)-dependent acyltransferase	4	4	1.20395e+06	1.14567e+06	1.10349e+06	1.0386e+06	127.092	119.618	123.355
znuC	16129811	3349	b1858	1940686	1941441	+	251	COG1121P	C	zinc transporter subunit: ATP-binding component of ABC superfamily	5	5	4285555	3.99589e+06	4.4182e+06	4.0694e+06	508.856	468.684	488.77
ruvB	16129813	3350	b1860	1942370	1943380	-	336	COG2255L	C	ATP-dependent DNA helicase, component of RuvABC resolvasome	7	7	777719	674322	1.24506e+06	1.04172e+06	143.397	119.977	131.687
yebC	16129817	3351	b1864	1945435	1946175	-	246	COG0217S	P	conserved protein, UPF0082 family	7	7	15105852	14509898	13092516	12381694	1507.9	1426.03	1466.97
aspS	16129819	1383036	b1866	1946774	1948546	-	590	COG0173J	P	aspartyl-tRNA synthetase	30	30	24040712	23885268	18395950	18448548	2118.71	2124.77	2121.74
cmoA	16129823	3353	b1870	1950726	1951469	+	247	COG2226H	P	tRNA cmo(5)U34 methyltransferase, SAM-dependent	5	5	1.03581e+06	1.02329e+06	1.55392e+06	1.61005e+06	178.97	185.434	182.202
cmoB	16129824	3353	b1871	1951466	1952437	+	323	COG2227H	P	tRNA mo(5)U34 methyltransferase, SAM-dependent	3	3	309935	315667	548568	558101	63.1802	64.2781	63.7291
argS	16129828	1383037	b1876	1958086	1959819	+	577	COG0018J	P	arginyl-tRNA synthetase	22	21	8059684	7.87107e+06	6.46335e+06	6.57128e+06	744.402	756.833	750.617
flhA	16129831	3356	b1879	1960996	1963074	-	692	COG1298NU	C	predicted flagellar export pore protein	3	3	732480	703190	542862	550841	62.5229	63.4419	62.9824
cheZ	16129833	3357	b1881	1964417	1965061	-	214	COG3143NT	P	chemotaxis regulator, protein phosphatase for CheY	9	9	8.26942e+06	7.13775e+06	20213402	19252840	2328.03	2217.4	2272.72
cheY	16129834	3357	b1882	1965072	1965461	-	129	COG2204T	P	chemotaxis regulator transmitting signal to flagellar motor component	3	3	26909012	33172642	27020744	33008424	3112.06	3801.67	3456.86
cheB	16129835	3357	b1883	1965476	1966525	-	349	COG2201NT	P	fused chemotaxis regulator: protein-glutamate methylesterase in two-component regulatory system with CheA	7	7	2.4306e+06	3.97083e+06	2.52048e+06	2.06012e+06	290.291	237.27	263.781
cheR	16129836	3357	b1884	1966528	1967388	-	286	COG1352NT	P	chemotaxis regulator, protein-glutamate methyltransferase	5	5	1.17291e+06	1.09744e+06	771124	852113	88.8125	98.1402	93.4764
tap	16129837	3357	b1885	1967407	1969008	-	533	COG0840NT	P	methyl-accepting protein IV	9	9	7.06414e+06	6799267	7.00689e+06	6688953	807.003	770.386	788.694
tar	16129838	3357	b1886	1969054	1970715	-	553	COG0840NT	P	methyl-accepting chemotaxis protein II	22	22	77919112	71044856	52207292	47246920	6012.86	5441.56	5727.21
cheW	16129839	3358	b1887	1970860	1971363	-	167	COG0835NT	P	purine-binding chemotaxis protein	4	4	44349680	50129444	39381988	43687088	4535.73	5031.56	4783.65
cheA	16129840	3358	b1888	1971384	1973348	-	654	COG0643NT	P	fused chemotactic sensory histidine kinase in two-component regulatory system with CheB and CheY: sensory histidine kinase/signal sensing protein	20	20	13195191	15565144	16245421	18282864	1871.03	2105.69	1988.36
motB	16129841	3358	b1889	1973353	1974279	-	308	COG1360N	P	protein that enables flagellar motor rotation	7	7	3490149	2.7592e+06	2.60757e+06	2.23839e+06	300.321	257.802	279.062
motA	16129842	3358	b1890	1974276	1975163	-	295	COG1291N	P	proton conductor component of flagella motor	3	3	3816293	3826872	3.13347e+06	3.35906e+06	360.891	386.872	373.881
otsA	16129848	3361	b1896	1978212	1979636	-	474	COG0380G	P	trehalose-6-phosphate synthase	4	4	1.80715e+06	1.50385e+06	2433204	2000466	280.239	230.399	255.319
otsB	16129849	3361	b1897	1979611	1980411	-	266	COG1877G	P	trehalose-6-phosphate phosphatase, biosynthetic	2	2	1.45755e+06	219061	361116	373199	41.5907	42.9824	42.2865
ftnB	16129852	1383039	b1902	1984949	1985452	+	167	COG1528P	P	ferritin B, probable ferrous iron reservoir	2	1	35652.5	72518.9
ftnA	16129855	1383041	b1905	1986740	1987237	+	165	COG1528P	P	ferritin iron storage protein (cytoplasmic)	5	5	3.20695e+06	2.95882e+06	2.79031e+06	2.67089e+06	321.368	307.614	314.491
yecA	16129858	1383044	b1908	1988978	1989643	-	221	COG3318R	P	conserved protein, UPF0149 family	5	5	815078	970355	1.11773e+06	1.40121e+06	128.732	161.382	145.057
pgsA	16129859	3363	b1912	1990293	1990841	-	182	COG0558I	P	phosphatidylglycerophosphate synthetase	3	3	1.63061e+06	1.22419e+06	1.29898e+06	1.10675e+06	149.607	127.468	138.537
uvrY	16129861	3363	b1914	1992727	1993383	-	218	COG2197TK	P	DNA-binding response regulator in two-component regulatory system with BarA	3	3	431156	596230	1.3838e+06	1.139e+06	159.376	131.182	145.279
yecC	16129864	3364	b1917	1995086	1995838	-	250	COG1126E	P	predicted transporter subunit: ATP-binding component of ABC superfamily	3	3	2425790	2540066	2799032	2.8073e+06	322.372	323.324	322.848
yecS	16129865	3364	b1918	1995835	1996503	-	222	COG0765E	P	inner membrane protein, predicted transporter subunit: membrane component of ABC superfamily	2	2	1.7949e+06	1.6181e+06	1.71457e+06	1.60109e+06	197.472	184.402	190.937
fliY	16129867	1383047	b1920	1997609	1998409	-	266	COG0834ET	P	cystine transporter subunit	17	17	29605420	15384338	26375760	13854872	3037.77	1595.7	2316.74
fliC	16129870	1383048	b1923	2000134	2001630	-	498	COG1344N	C	flagellar filament structural protein (flagellin)	24	24	68055472	45570660	56928100	37806652	6556.57	4354.3	5455.43
fliD	16129871	3366	b1924	2001896	2003302	+	468	COG1345N	P	flagellar filament capping protein	2	2	1.80564e+06	726562	1.4325e+06	497764	164.986	57.3289	111.157
amyA	16129874	3366	b1927	2004180	2005667	+	495	COG0366G	P	cytoplasmic alpha-amylase	2	2	1.87645e+06	1.64898e+06	1.63737e+06	1.53174e+06	188.581	176.415	182.498
yedD	16129875	1383049	b1928	2005701	2006114	-	137	-	P	lipoprotein	4	4	4770209	4.20989e+06	5.2423e+06	4363262	603.77	502.529	553.15
yedE	16129876	3367	b1929	2006301	2007506	+	401	COG2391R	P	predicted inner membrane protein	3	3	1244075	1.21258e+06	1.16436e+06	1115193	134.103	128.44	131.271
fliF	16129885	3368	b1938	2011253	2012911	+	552	COG1766NU	C	flagellar basal-body MS-ring and collar protein	12	12	2.90314e+06	2.54511e+06	3.28437e+06	3.07121e+06	378.27	353.719	365.995
fliG	16129886	3368	b1939	2012904	2013899	+	331	COG1536N	C	flagellar motor switching and energizing component	7	7	3.81253e+06	3521104	3.80512e+06	3.52382e+06	438.246	405.848	422.047
FLII	16129888	3368	b1941	2014578	2015951	+	457	COG1157NU	C	flagellum-specific ATP synthase	5	5	1.08066e+06	1.0466e+06	1.31982e+06	1.38893e+06	152.007	159.966	155.987
fliL	16129891	3369	b1944	2017642	2018106	+	154	COG1580N	C	flagellar biosynthesis protein	2	2	6.28702e+06	6065088	4886777	4666930	562.824	537.503	550.164
fliM	16129892	3369	b1945	2018111	2019115	+	334	COG1868N	C	flagellar motor switching and energizing component	6	6	2.9181e+06	2.94839e+06	4060345	4.14936e+06	467.641	477.893	472.767
fliP	16129895	3369	b1948	2019893	2020630	+	245	COG1338NU	C	flagellar biosynthesis protein	2	2	1.11192e+06	798220	1.25984e+06	958923	145.1	110.442	127.771
yedP	16129901	1383054	b1955	2023535	2024350	+	271	COG3769R	P	predicted mannosyl-3-phosphoglycerate phosphatase	1	1	76661.9	40040.6
yedI	16129904	3370	b1958	2026473	2027390	-	305	COG2354S	P	conserved inner membrane protein	3	3	1.412e+06	1.26111e+06	874545	736702	100.724	84.848	92.7859
dcm	16129907	3371	b1961	2028923	2030341	-	472	COG0270L	P	DNA cytosine methyltransferase	3	3	629098	645286	913395	774100	105.198	89.1552	97.1767
hchA	16129913	1383056	b1967	2033859	2034710	+	283	COG0693R	P	Glyoxalase III and Hsp31 molecular chaperone	4	4	2968275	2.78762e+06	5.2921e+06	4.33923e+06	609.506	499.762	554.634
yedV	16129914	3372	b1968	2034818	2036176	-	452	COG0642T	P	predicted sensory kinase in two-component regulatory system with YedW	1	1	64196.1	51708.1
hiuH	16129916	1383057	b1970	2036980	2037393	+	137	COG2351R	P	Hydroxyisourate hydrolase	3	3	667013	926651	660264	1044354	76.0444	120.281	98.1628
yedY	16129917	3373	b1971	2037502	2038506	+	334	COG2041R	C	membrane-anchored, periplasmic TMAO, DMSO reductase	10	10	1.35746e+06	1.21405e+06	734366	1.80085e+06	84.5791	207.409	145.994
zinT	16129919	1383058	b1973	2039399	2040049	+	216	COG3443R	P	zinc and cadmium binding protein, periplasmic	8	7	85255952	103571968	76407536	98016808	8800.07	11288.9	10044.5
shiA	16129925	3374	b1981	2051667	2052983	+	438	COG2211G	P	shikimate transporter	3	3	3.22081e+06	3631884	2793339	2249527	321.717	259.084	290.401
AMN	16129926	3374	b1982	2053085	2054539	+	484	COG0775F	P	AMP nucleosidase	13	13	3.30727e+06	2.72686e+06	7780620	10800858	896.116	1243.97	1070.04
yeeN	16129927	1383059	b1983	2054882	2055598	+	238	COG0217S	P	conserved protein, UPF0082 family	5	6	6690612	7350857	6.29325e+06	6.76186e+06	724.811	778.783	751.797
CBL	16129929	1383060	b1987	2057988	2058938	-	316	COG0583K	P	DNA-binding transcriptional activator for the ssuEADCB and tauABCD operons	2	2	605325	673411	578158	624680	66.588	71.9462	69.2671
ldtA	16129931	1383062	b1990	2060415	2061347	-	310	COG1376S	P	L,D-transpeptidase linking Lpp to murein	1	1	1.01644e+06	1.74886e+06
cobT	16129932	3375	b1991	2061412	2062491	-	359	COG2038H	P	nicotinate-nucleotide--dimethylbenzimidazole phosphoribosyltransferase	1	1	553950	612603
sbcB	16129952	1383067	b2011	2080780	2082207	+	475	COG2925L	P	exonuclease I	7	6	777907	762881	736156	695215	84.7852	80.0699	82.4275
yeeD	16129953	3378	b2012	2082250	2082477	-	75	COG0425O	P	conserved protein	1	1	76705.5	129954
yeeZ	16129957	3380	b2016	2086328	2087152	-	274	COG0451MG	P	predicted epimerase, with NAD(P)-binding Rossmann-fold domain	5	5	4779002	4.96062e+06	4590346	4772326	528.683	549.642	539.163
hisG	16129960	3382	b2019	2088216	2089115	+	299	COG0040E	P	ATP phosphoribosyltransferase	11	11	20604152	19971098	19896242	19740662	2291.51	2273.59	2282.55
hisD	16129961	3382	b2020	2089121	2090425	+	434	COG0141E	P	bifunctional histidinal dehydrogenase/ histidinol dehydrogenase	9	9	11291409	10364455	11613183	10371150	1337.52	1194.47	1266
hisC	16129962	3382	b2021	2090422	2091492	+	356	COG0079E	P	histidinol-phosphate aminotransferase	14	14	17748634	16154147	18832498	14374263	2168.99	1655.52	1912.26
hisH	16129964	3382	b2023	2092559	2093149	+	196	COG0118E	P	imidazole glycerol phosphate synthase, glutamine amidotransferase subunit with HisF	6	6	6311100	6150338	3603792	3.60021e+06	415.059	414.646	414.852
hisF	16129966	3382	b2025	2093868	2094644	+	258	COG0107E	P	imidazole glycerol phosphate synthase, catalytic subunit with HisH	13	13	5090554	5786215	4.16561e+06	4786644	479.765	551.291	515.528
hisI	16129967	3382	b2026	2094638	2095249	+	203	COG0139E	P	fused phosphoribosyl-AMP cyclohydrolase/phosphoribosyl-ATP pyrophosphatase	4	4	4.24137e+06	3.68753e+06	3854542	3.51151e+06	443.938	404.431	424.185
ugd	16129969	1383069	b2028	2096471	2097637	-	388	COG1004M	P	UDP-glucose 6-dehydrogenase	16	16	146572	277297	113254	65538.5	13.0438	7.54825	10.296
gnd	16129970	1383070	b2029	2097886	2099292	-	468	COG0362G	P	6-phosphogluconate dehydrogenase, decarboxylating	30	30	58813944	52014392	57241648	50807464	6592.68	5851.64	6222.16
wbbK	16129972	3383	b2032	2101415	2102533	-	372	COG0438M	P	lipopolysaccharide biosynthesis protein	4	4	1.99072e+06	2.00946e+06	3.08617e+06	2.97007e+06	355.442	342.071	348.757
wbbJ	16129973	3383	b2033	2102518	2103108	-	196	COG0110R	P	predicted lipopolysaccharide biosynthesis O-acetyl transferase	2	2	1882324	1.96303e+06	1.76119e+06	1862574	202.841	214.518	208.679
wbbI	16129974	3383	b2034	2103089	2104081	-	330	-	P	d-Galf:alpha-d-Glc beta-1,6-galactofuranosyltransferase	5	5	3478973	3.77721e+06	5523502	6.12145e+06	636.157	705.025	670.591
glf	16129976	3383	b2036	2105250	2106353	-	367	COG0562M	P	UDP-galactopyranose mutase, FAD/NAD(P)-binding	10	10	8524600	9930594	5026268	5.54966e+06	578.889	639.17	609.03
rfbC	16129978	3383	b2038	2107605	2108162	-	185	COG1898M	P	dTDP-4-deoxyrhamnose-3,5-epimerase	5	5	2.4645e+06	3.10486e+06	2.39557e+06	3.14615e+06	275.905	362.351	319.128
rfbA	16129979	3383	b2039	2108162	2109043	-	293	COG1209M	P	glucose-1-phosphate thymidylyltransferase	13	13	8701136	8597137	5.36118e+06	5.41062e+06	617.462	623.157	620.309
rfbD	16129980	3383	b2040	2109101	2110000	-	299	COG1091M	P	dTDP-4-dehydrorhamnose reductase subunit, NAD(P)-binding, of dTDP-L-rhamnose synthase	5	5	4545114	4611814	3.61003e+06	3.46392e+06	415.778	398.95	407.364
rfbB	16129981	3383	b2041	2110000	2111085	-	361	COG1088M	P	dTDP-glucose 4,6 dehydratase, NAD(P)-binding	11	11	4230066	4856008	4267844	4.97194e+06	491.54	572.633	532.086
wcaN	16129982	1383072	b2042	2111458	2112351	-	297	COG1210M	P	putative regulatory subunit for GalU	10	10	8155396	8834848	11504138	11263010	1324.96	1297.19	1311.08
cpsG	16129988	3385	b2048	2119633	2121003	-	456	COG1109G	P	phosphomannomutase	3	3	158541	199695
asmA	16130004	3388	b2064	2137783	2139636	-	617	COG2982M	P	predicted assembly protein	6	6	854659	605076	708329	602514	81.5803	69.3932	75.4868
DCD	16130005	3388	b2065	2139658	2140239	-	193	COG0717F	P	2'-deoxycytidine 5'-triphosphate deaminase	3	3	2.6819e+06	1484186	3.15343e+06	2.06623e+06	363.189	237.974	300.582
yegE	16130007	1383073	b2067	2141290	2144607	+	1105	COG3447T	P	predicted diguanylate cyclase, GGDEF domain signaling protein	1	1	175302	324283
baeR	16130019	3390	b2079	2162300	2163022	+	240	COG0745TK	P	DNA-binding response regulator in two-component regulatory system with BaeS	4	4	1.50615e+06	1.41233e+06	1.1542e+06	1.06787e+06	132.932	122.99	127.961
yegQ	16130021	1383077	b2081	2163692	2165053	+	453	COG0826O	P	predicted peptidase	12	12	3.49101e+06	3067981	3945165	3539551	454.376	407.66	431.018
gatD	16130029	1383080	b2091	2169857	2170897	-	346	COG1063ER	P	galactitol-1-phosphate dehydrogenase, Zn-dependent and NAD(P)-binding	6	6	1.4164e+06	1.82106e+06	1.24848e+06	1.5173e+06	143.791	174.752	159.271
GATB	16130031	3392	b2093	2172304	2172588	-	94	COG3414G	P	galactitol-specific enzyme IIB component of PTS	4	4	895163	1.3939e+06	13126011	15303641	1511.76	1762.56	1637.16
GATA	16130032	3392	b2094	2172619	2173071	-	150	COG1762GT	P	galactitol-specific enzyme IIA component of PTS	6	6	14410975	12758890	10143595	9071493	1168.27	1044.79	1106.53
gatZ	16130033	3392	b2095	2173081	2174343	-	420	COG4573G	P	D-tagatose 1,6-bisphosphate aldolase 2, subunit	17	17	37905340	64510124	29598350	53307604	3408.93	6139.59	4774.26
yegU	16130037	3393	b2099	2178117	2179121	+	334	COG1397O	P	predicted hydrolase	3	3	303201	281609	184332	165099	21.23	19.0149	20.1224
yegW	16130039	3394	b2101	2180057	2180803	-	248	COG2188K	P	predicted DNA-binding transcriptional regulator	2	2	202348	209372	520359	368526	59.9312	42.4442	51.1877
thiD	16130041	3394	b2103	2181738	2182538	-	266	COG0351H	P	bifunctional hydroxy-methylpyrimidine kinase/ hydroxy-phosphomethylpyrimidine kinase	11	11	2.5238e+06	2.78009e+06	3.24908e+06	3.66424e+06	374.205	422.021	398.113
thiM	16130042	3394	b2104	2182535	2183323	-	262	COG2145H	P	hydoxyethylthiazole kinase	5	5	2.86933e+06	4141847	2697474	3.67809e+06	310.676	423.616	367.146
metG	16130052	1383084	b2114	2192322	2194355	+	677	COG0143J	P	methionyl-tRNA synthetase	28	28	12815290	10923252	9843561	8480691	1133.71	976.745	1055.23
yehS	16130062	3398	b2124	2209748	2210218	-	156	COG4807S	P	conserved protein, DUF1456 family	4	4	266440	296062	2.49807e+06	1926133	287.709	221.838	254.774
osmF	16130069	3399	b2131	2216586	2217503	-	305	COG1732M	C	predicted transporter subunit: periplasmic-binding component of ABC superfamily	2	2	1.21325e+06	973224	2.41261e+06	1.90992e+06	277.868	219.971	248.919
bglX	16130070	1383086	b2132	2217714	2220011	-	765	COG1472G	P	beta-D-glucoside glucohydrolase, periplasmic	21	22	3.02632e+06	3.08983e+06	2.8522e+06	2.90425e+06	328.496	334.49	331.493
DLD	16130071	1383087	b2133	2220207	2221922	+	571	COG0277C	P	D-lactate dehydrogenase, FAD-binding, NADH independent	23	23	6.93086e+06	7.29833e+06	5597998	5160937	644.737	594.4	619.568
yohF	16130075	1383088	b2137	2224531	2225292	-	253	COG1028IQR	P	predicted oxidoreductase with NAD(P)-binding Rossmann-fold domain	1	1	556291	562225
cdd	16130081	1383090	b2143	2229866	2230750	+	294	COG0295F	P	cytidine/deoxycytidine deaminase	3	3	1.66196e+06	1.52002e+06	1.61733e+06	1.47902e+06	186.273	170.342	178.308
mglC	16130086	3403	b2148	2234765	2235775	-	336	COG4211G	C	methyl-galactoside transporter subunit	1	1	90114.3	92104.8
mglA	16130087	3403	b2149	2235791	2237311	-	506	COG1129G	C	fused methyl-galactoside transporter subunits of ABC superfamily: ATP-binding components	4	4	141163	129139	167800	349213	19.326	40.2199	29.7729
mglB	16130088	3403	b2150	2237372	2238370	-	332	COG1879G	C	methyl-galactoside transporter subunit	10	10	2.54206e+06	2.47215e+06	2702825	2619887	311.292	301.74	306.516
folE	16130091	3404	b2153	2241006	2241674	-	222	COG0302H	P	GTP cyclohydrolase I	11	11	32844206	27213926	31579546	25464536	3637.11	2932.82	3284.96
yeiG	16130092	1383092	b2154	2241932	2242768	+	278	COG0627R	P	S-formylglutathione hydrolase	6	5	2432053	2.63132e+06	1.96573e+06	2.42066e+06	226.399	278.795	252.597
cirA	16130093	1383093	b2155	2242800	2244791	-	663	COG4771P	P	catecholate siderophore receptor CirA	37	37	63495580	68648000	44186640	49299416	5089.1	5677.95	5383.53
lysP	16130094	1383094	b2156	2245085	2246554	-	489	COG0833E	P	lysine transporter	1	1	4.02254e+06	3.2043e+06
yeiE	16130095	1383095	b2157	2246759	2247640	-	293	COG0583K	P	predicted DNA-binding transcriptional regulator	3	3	249399	287319	372465	425011	42.8978	48.9497	45.9238
nfo	16130097	3405	b2159	2248862	2249719	+	285	COG0648L	P	endonuclease IV with intrinsic 3'-5' exonuclease activity	5	5	1.06901e+06	756721	1.40432e+06	1.39954e+06	161.74	161.189	161.464
fruA	16130105	3407	b2167	2257741	2259432	-	563	COG1299G	P	fused fructose-specific PTS enzymes: IIBcomponent/IIC components	4	4	2.05453e+06	1.83919e+06	989446	954064	113.957	109.882	111.92
fruK	16130106	3407	b2168	2259449	2260387	-	312	COG1105G	P	fructose-1-phosphate kinase	4	4	690370	754542	1.04954e+06	1.17059e+06	120.879	134.82	127.85
fruB	16130107	3407	b2169	2260387	2261517	-	376	COG4668G	P	fused fructose-specific PTS enzymes: IIA component/HPr component	6	6	861826	662874	690619	774595	79.5406	89.2123	84.3764
yeiR	16130111	3408	b2173	2265851	2266837	+	328	COG0523R	P	predicted enzyme	4	4	184869	184375	184570	167504	21.2574	19.2919	20.2747
BCR	16130120	3410	b2182	2276592	2277782	-	396	COG2814G	P	bicyclomycin/multidrug efflux system	1	1	471815	408478
rsuA	16130121	3410	b2183	2277810	2278505	-	231	COG1187J	P	16S rRNA U516 pseudouridine synthase	3	3	1.87034e+06	1.84264e+06	8771814	9087594	1010.27	1046.64	1028.46
yejH	16130122	1383102	b2184	2278654	2280414	+	586	COG1061KL	P	predicted ATP-dependent DNA or RNA helicase	1	1	34579	128769
rplY	16130123	1383103	b2185	2280539	2280823	+	94	COG1825J	P	50S ribosomal subunit protein L25	7	7	76141776	88215784	55540060	67666384	6396.7	7793.33	7095.02
yejK	16130124	1383104	b2186	2280962	2281969	-	335	COG3081R	P	nucleotide associated protein	8	8	3.77796e+06	3.26972e+06	3857490	3.56265e+06	444.278	410.321	427.299
yejL	16130125	3411	b2187	2282151	2282378	+	75	COG3082S	P	conserved protein, UPF0352 family	3	3	1.44822e+06	1.87785e+06	1.29363e+06	1.5235e+06	148.991	175.465	162.228
yejM	16130126	3411	b2188	2282398	2284158	+	586	COG3083R	P	predicted hydrolase, inner membrane	7	7	807097	789940	789880	782782	90.9726	90.1552	90.5639
narP	16130130	1383106	b2193	2288522	2289169	+	215	COG2197TK	P	DNA-binding response regulator in two-component regulatory system with NarQ or NarX	5	5	1.79386e+06	1.26224e+06	1.7551e+06	1237028	202.139	142.472	172.306
ccmH	16130131	3412	b2194	2289380	2290432	-	350	COG4235O	P	heme lyase, CcmH subunit	1	1	52241.7
dsbE	16130132	3412	b2195	2290429	2290986	-	185	COG0526OC	P	periplasmic thioredoxin of cytochrome c-type biogenesis	2	2	250287	64094.5	116961	65361.3	13.4708	7.52785	10.4993
eco	16130146	1383107	b2209	2301927	2302415	+	162	COG4574R	P	ecotin, a serine protease inhibitor	1	1	219911	145585
mqo	16130147	1383108	b2210	2303130	2304776	-	548	COG0579R	P	malate dehydrogenase, FAD/NAD(P)-binding domain	9	9	1.97134e+06	2.59553e+06	2023140	2.63257e+06	233.011	303.2	268.105
yojI	16130148	3413	b2211	2304994	2306637	-	547	COG4615QP	P	Microcin J25 efflux pump, TolC-dependent; fused ABC transporter permease and ATP-binding components	4	4	1.18386e+06	1.06903e+06	1.01086e+06	809941	116.424	93.2832	104.854
ompC	16130152	1383109	b2215	2309668	2310771	-	367	COG3203M	P	outer membrane porin protein C	12	12	13893570	7.47673e+06	13929556	7441026	1604.31	857.004	1230.66
rcsD	16130153	3414	b2216	2311510	2314182	+	890	COG0642T	P	phosphotransfer intermediate protein in two-component regulatory system with RcsBC	4	4	1.02503e+06	912065	1.71624e+06	1.58086e+06	197.664	182.072	189.868
rcsB	16130154	3414	b2217	2314199	2314849	+	216	COG2197TK	P	DNA-binding response regulator in two-component regulatory system with RcsC and YojN	5	5	3.21968e+06	3.86491e+06	10830642	10798430	1247.4	1243.69	1245.54
gyrA	16130166	1383110	b2231	2334815	2337442	-	875	COG0188L	C	DNA gyrase (type II topoisomerase), subunit A	28	28	17194548	15088550	17343872	15231445	1997.54	1754.25	1875.9
ubiG	16130167	1383111	b2232	2337589	2338311	+	240	COG2227H	P	bifunctional 3-demethylubiquinone-9 3-methyltransferase/ 2-octaprenyl-6-hydroxy phenol methylase	5	5	1.11018e+06	1.28061e+06	2.07381e+06	2.18096e+06	238.846	251.187	245.017
nrdA	16130169	1383113	b2234	2342887	2345172	+	761	COG0209F	C	ribonucleoside-diphosphate reductase 1, alpha subunit	27	27	12827128	9891681	9386421	7.34741e+06	1081.06	846.222	963.641
nrdB	16130170	3419	b2235	2345406	2346536	+	376	COG0208F	C	ribonucleoside-diphosphate reductase 1, beta subunit, ferritin-like protein	11	10	7885637	6788691	7941986	6.7499e+06	914.701	777.405	846.053
yfaY	16130184	1383115	b2249	2360453	2361655	-	400	COG1058R	P	conserved protein	6	6	2.45979e+06	2.55265e+06	1.94037e+06	1.91636e+06	223.478	220.712	222.095
arnA	16130190	3424	b2255	2366061	2368043	+	660	COG0223J	P	fused UDP-L-Ara4N formyltransferase/UDP-GlcA C-4'-decarboxylase	26	26	261338	789389	283332	621302	32.6321	71.557	52.0946
menB	16130197	3425	b2262	2373984	2374841	-	285	COG0447H	P	dihydroxynaphthoic acid synthetase	5	6	3133069	3.85134e+06	2.33384e+06	2.9907e+06	268.795	344.447	306.621
elaB	16130201	3426	b2266	2378744	2379049	-	101	COG4575S	P	conserved protein	1	1	22264976	18919678
elaA	16130202	3426	b2267	2379104	2379565	-	153	COG2153R	P	predicted acyltransferase with acyl-CoA N-acyltransferase domain	1	1	2.06917e+06	2.03796e+06
nuoM	16130212	3427	b2277	2389534	2391063	-	509	COG1008C	C	NADH:ubiquinone oxidoreductase, membrane subunit M	2	2	4297647	3.51913e+06	3.33288e+06	2.61208e+06	383.858	300.84	342.349
nuoL	16130213	3428	b2278	2391227	2393068	-	613	COG1009CP	C	NADH:ubiquinone oxidoreductase, membrane subunit L	3	3	2.06436e+06	2.02824e+06	2.10772e+06	1992683	242.752	229.503	236.127
nuoK	16130214	3428	b2279	2393065	2393367	-	100	COG0713C	C	NADH:ubiquinone oxidoreductase, membrane subunit K	2	2	2.73617e+06	2.17265e+06	2735547	2.17375e+06	315.061	250.357	282.709
nuoI	16130216	3428	b2281	2393930	2394472	-	180	COG1143C	C	NADH:ubiquinone oxidoreductase, chain I	6	6	3.44254e+06	2.96865e+06	4006643	3.77665e+06	461.456	434.968	448.212
nuoH	16130217	3428	b2282	2394487	2395464	-	325	COG1005C	C	NADH:ubiquinone oxidoreductase, membrane subunit H	4	4	3739813	3.34175e+06	2981261	3.33236e+06	343.36	383.798	363.579
nuoF	16130219	3428	b2284	2398240	2399577	-	445	COG1894C	C	NADH:ubiquinone oxidoreductase, chain F	16	16	6.33997e+06	6105174	6288317	6.16359e+06	724.243	709.878	717.06
nuoE	16130220	3428	b2285	2399574	2400074	-	166	COG1905C	C	NADH:ubiquinone oxidoreductase, chain E	3	3	562309	650107	823841	893162	94.8841	102.868	98.8761
nuoB	16130222	3428	b2287	2401973	2402635	-	220	COG0377C	C	NADH:ubiquinone oxidoreductase, chain B	5	5	2087269	2.19983e+06	1.98134e+06	1.91049e+06	228.197	220.036	224.117
lrhA	16130224	1383122	b2289	2403725	2404663	-	312	COG0583K	P	DNA-binding transcriptional repressor of flagellar, motility and chemotaxis genes	1	1	384523	650055
alaA	16130225	3429	b2290	2405583	2406800	+	405	COG0436E	P	valine-pyruvate aminotransferase 2	6	6	1.59903e+06	1.4e+06	1.76798e+06	1664020	203.623	191.65	197.636
yfbR	16130226	3429	b2291	2406884	2407483	+	199	COG1896R	P	5'-nucleotidase	5	5	1170516	725618	1.10772e+06	702250	127.579	80.8801	104.23
ackA	16130231	3431	b2296	2411492	2412694	+	400	COG0282C	P	acetate kinase A and propionate kinase 2	13	13	6074174	6464199	5881799	6.30151e+06	677.423	725.762	701.593
pta	16130232	3431	b2297	2412769	2414913	+	714	COG0857R	P	phosphate acetyltransferase	24	24	12590048	11206219	11943839	10593956	1375.61	1220.14	1297.87
yfcD	16130234	3432	b2299	2416656	2417198	-	180	-	P	predicted NUDIX hydrolase	4	4	3.53496e+06	3299878	1.79105e+06	1.82438e+06	206.281	210.119	208.2
yfcF	16130236	1383125	b2301	2417863	2418507	-	214	COG0625O	P	glutathione S-transferase	4	4	549878	681384	472800	593386	54.4537	68.342	61.3978
folX	16130238	3433	b2303	2419347	2419709	+	120	COG1539H	P	D-erythro-7,8-dihydroneopterin triphosphate 2'-epimerase and dihydroneopterin aldolase	4	4	2.39017e+06	4902206	2.55065e+06	5.21272e+06	293.765	600.363	447.064
yfcH	16130239	3433	b2304	2419730	2420623	+	297	COG1090R	P	conserved protein with NAD(P)-binding Rossmann-fold domain	4	4	843041	884207	796456	934305	91.7301	107.607	99.6683
hisP	16130241	3434	b2306	2421758	2422531	-	257	COG4598E	C	histidine/lysine/arginine/ornithine transporter subunit	4	4	2.14829e+06	2250818	1.74032e+06	1.89361e+06	200.438	218.092	209.265
hisM	16130242	3434	b2307	2422539	2423255	-	238	COG4160E	C	histidine/lysine/arginine/ornithine transporter subunit	1	1		55664.6
hisQ	16130243	3434	b2308	2423252	2423938	-	228	COG4215E	C	histidine/lysine/arginine/ornithine transporter permease subunit	3	3	807378	942169	751318	872440	86.5314	100.481	93.5064
hisJ	16130244	3434	b2309	2424028	2424810	-	260	COG0834ET	C	histidine/lysine/arginine/ornithine transporter subunit	11	11	23760108	25173644	18679858	18625674	2151.41	2145.17	2148.29
argT	16130245	1383127	b2310	2425031	2425813	-	260	COG0834ET	C	lysine/arginine/ornithine transporter subunit	11	11	8207386	7.03514e+06	8.38438e+06	7011860	965.653	807.576	886.614
ubiX	16130246	3435	b2311	2426079	2426648	-	189	COG0163H	P	3-octaprenyl-4-hydroxybenzoate carboxy-lyase	2	2	310224	345559	257017	276548	29.6014	31.8509	30.7261
purF	16130247	3435	b2312	2426743	2428260	-	505	COG0034F	P	amidophosphoribosyltransferase	14	14	16654756	15434197	14388210	13364219	1657.13	1539.19	1598.16
folC	16130250	3436	b2315	2429696	2430964	-	422	COG0285H	P	bifunctional folylpolyglutamate synthase/ dihydrofolate synthase	8	8	8394627	7695853	2.65761e+06	2.19732e+06	306.084	253.071	279.578
accD	16130251	3436	b2316	2431034	2431948	-	304	COG0777I	P	acetyl-CoA carboxylase, beta (carboxyltransferase) subunit	11	11	18932906	19676264	23768484	23911916	2737.48	2754	2745.74
truA	16130253	3437	b2318	2432846	2433658	-	270	COG0101J	P	pseudouridylate synthase I	3	3	286360	445380	392710	302792	45.2296	34.8734	40.0515
usg	16130254	3437	b2319	2433658	2434671	-	337	COG0136E	P	predicted semialdehyde dehydrogenase	9	9	2.62957e+06	2921773	3294117	3305293	379.393	380.68	380.036
pdxB	16130255	3437	b2320	2434737	2435873	-	378	COG0111HE	P	erythronate-4-phosphate dehydrogenase	12	12	6.98678e+06	6.47484e+06	6766705	5962017	779.34	686.662	733.001
fabB	16130258	1383130	b2323	2438407	2439627	-	406	COG0304IQ	P	3-oxoacyl-[acyl-carrier-protein] synthase I	14	14	81699176	75063200	68475752	62041516	7886.54	7145.5	7516.02
yfcL	16130260	3438	b2325	2441913	2442191	-	92	-	P	predicted protein	2	2	94586.6	147733	2164187	1.46937e+06	249.256	169.232	209.244
epmC	16130261	3438	b2326	2442225	2442773	-	182	COG3101S	P	conserved protein	1	1	537759	331818
aroC	16130264	3438	b2329	2444410	2445495	-	361	COG0082E	P	chorismate synthase	5	5	1.17686e+06	1249380	2.46696e+06	2.56347e+06	284.127	295.242	289.685
smrB	16130266	1383131	b2331	2446628	2447179	+	183	COG2840S	P	predicted DNA endonuclease	3	3	392339	303132	594636	615421	68.4859	70.8798	69.6829
fadI	16130275	3440	b2342	2457181	2458491	-	436	COG0183I	C	beta-ketoacyl-CoA thiolase, anaerobic, subunit	4	4	455759	495892	382440	906641	44.0467	104.42	74.2335
mlaA	16130279	1383135	b2346	2462274	2463029	-	251	COG2853M	P	ABC transporter maintaining OM lipid asymmetry, OM lipoprotein component	5	4	6.49505e+06	5854039	6.45858e+06	5.92441e+06	743.853	682.331	713.092
gtrB	16130283	3441	b2351	2466236	2467156	+	306	COG0463M	P	CPS-53 (KpLE1) prophage; bactoprenol glucosyl transferase	3	3	1.2817e+06	2.26804e+06	2.55664e+06	1808968	294.456	208.344	251.4
gtrS	16130284	3441	b2352	2467153	2468484	+	443	-	P	serotype-specific glucosyl transferase, CPS-53 (KpLE1) prophage	1	1	199762	216981
dsdA	16130298	3444	b2366	2477224	2478552	+	442	COG3048E	P	D-serine dehydratase	2	2	210160	69584.2	618786	591751	71.2674	68.1537	69.7105
evgA	16130301	3446	b2369	2481777	2482391	+	204	COG2197TK	P	DNA-binding response regulator in two-component regulatory system with EvgS	2	2	559410	582290	511591	529973	58.9214	61.0385	59.98
alaC	16130311	1383144	b2379	2495079	2496317	-	412	COG0436E	P	valine-pyruvate aminotransferase 3	7	7	1.46231e+06	1.3094e+06	2133395	1.63733e+06	245.709	188.576	217.142
ypdB	16130313	3448	b2381	2498405	2499139	+	244	COG3279KT	P	predicted response regulator in two-component system with YpdA	2	2	214333	248748	245398	230613	28.2632	26.5604	27.4118
glk	16130320	1383145	b2388	2506483	2507448	-	321	COG0837G	P	glucokinase	5	4	4076939	3870823	4.41192e+06	4.01833e+06	508.133	462.803	485.468
mntH	16130324	1383148	b2392	2509490	2510728	-	412	COG1914P	P	manganese/divalent cation transporter	2	2	4249773	3.82881e+06	4241260	3843339	488.478	442.648	465.563
nupC	16130325	1383149	b2393	2511064	2512266	+	400	COG1972F	P	nucleoside (except guanosine) transporter	6	6	3.68799e+06	2781403	3.25933e+06	2.44972e+06	375.387	282.142	328.764
gltX	16130330	1383150	b2400	2517279	2518694	-	471	COG0008J	P	glutamyl-tRNA synthetase	18	18	11078971	12266880	9473441	9807600	1091.08	1129.57	1110.33
yfeH	16130336	1383154	b2410	2524968	2525966	+	332	COG0385R	P	predicted inner membrane protein	1	1	65035.5	49869.6
ligA	16130337	3452	b2411	2526183	2528198	-	671	COG0272L	P	DNA ligase, NAD(+)-dependent	13	13	1184656	1.53085e+06	1.21917e+06	1.46501e+06	140.416	168.73	154.573
zipA	16130338	1383155	b2412	2528269	2529255	-	328	COG3115D	P	cell division protein involved in Z ring assembly	3	3	743423	466207	2.14975e+06	1.65872e+06	247.593	191.039	219.316
cysZ	16130339	1383156	b2413	2529485	2530246	+	253	COG2981E	P	predicted inner membrane protein	1	1	2.63881e+06	1.86615e+06
cysK	16130340	1383157	b2414	2530431	2531402	+	323	COG0031E	C	cysteine synthase A, O-acetylserine sulfhydrolase A subunit	17	17	118938896	117339032	119126800	117130192	13720.2	13490.2	13605.2
ptsH	16130341	3453	b2415	2531786	2532043	+	85	COG1925G	P	phosphohistidinoprotein-hexose phosphotransferase component of PTS system (Hpr)	3	3	2546215	4423367	1.89758e+06	4972993	218.55	572.754	395.652
ptsI	16130342	3453	b2416	2532088	2533815	+	575	COG1080G	P	PEP-protein phosphotransferase of PTS system (enzyme I)	35	35	73172352	62883932	47159580	42078744	5431.5	4846.33	5138.91
crr	16130343	3453	b2417	2533856	2534365	+	169	COG2190G	P	glucose-specific enzyme IIA component of PTS	8	8	46695144	30851892	45004596	30073770	5183.31	3463.68	4323.49
PDXK	16130344	1383158	b2418	2534408	2535259	-	283	COG2240H	P	pyridoxal-pyridoxamine kinase/hydroxymethylpyrimidine kinase	5	5	3.13388e+06	2402485	3.12704e+06	2.45809e+06	360.15	283.105	321.627
cysM	16130347	1383159	b2421	2536694	2537605	-	303	COG0031E	P	cysteine synthase B (O-acetylserine sulfhydrolase B)	11	11	7.17202e+06	7.39058e+06	6100290	6.29647e+06	702.588	725.182	713.885
cysA	16130348	3455	b2422	2537739	2538836	-	365	COG1118P	C	sulfate/thiosulfate transporter subunit	13	13	2.22292e+06	1.75715e+06	2.55992e+06	1.9443e+06	294.833	223.931	259.382
cysU	16130349	3455	b2424	2539701	2540534	-	277	COG0555O	C	sulfate/thiosulfate ABC transporter permease	1	1	28360.7	346224
CYSP	16130350	3455	b2425	2540534	2541550	-	338	COG4150P	C	thiosulfate-binding protein	16	16	9850674	12515002	6871790	8760717	791.443	1009	900.22
murQ	16130353	3456	b2428	2543795	2544691	+	298	COG2103R	P	N-acetylmuramic acid 6-phosphate (MurNAc-6-P) etherase	2	2	235949	130414	247785	111089	28.5381	12.7944	20.6663
yfeY	16130357	3457	b2432	2548663	2549238	-	191	-	P	RpoE-regulated lipoprotein	6	5	2328870	1.8936e+06	2.36483e+06	1.75447e+06	272.364	202.067	237.216
amiA	16130360	3459	b2435	2550374	2551243	+	289	COG0860M	P	N-acetylmuramoyl-l-alanine amidase I	3	3	293290	247655	295592	217406	34.0442	25.0392	29.5417
hemF	16130361	3459	b2436	2551247	2552146	+	299	COG0408H	P	coproporphyrinogen III oxidase	1	1	896990	972668
maeB	16130388	1383162	b2463	2574120	2576399	-	759	COG0281C	P	fused malic enzyme predicted oxidoreductase/predicted phosphotransacetylase	24	24	6694842	7.06368e+06	6.55091e+06	6.83071e+06	754.487	786.712	770.6
talA	16130389	3467	b2464	2576688	2577638	+	316	COG0176G	P	transaldolase A	14	14	5753855	9214058	4794571	6620008	552.204	762.445	657.325
tktB	16130390	3467	b2465	2577658	2579661	+	667	COG0021G	P	transketolase 2, thiamin-binding	14	14	5.3382e+06	3.89584e+06	17470482	17613532	2012.12	2028.6	2020.36
nudK	16130392	3468	b2467	2580925	2581500	-	191	COG0494LR	P	GDP-mannose pyrophosphatase	1	1	236334	273058
yffB	16130396	3469	b2471	2589269	2589625	+	118	COG1393P	P	predicted reductase, function unknown, ArsC family; low abundance protein	1	1	414773	333899
dapE	16130397	3469	b2472	2589629	2590756	+	375	COG0624E	P	N-succinyl-diaminopimelate deacylase	8	8	1.28241e+06	1256406	1.24945e+06	1.36288e+06	143.902	156.966	150.434
ypfJ	16130400	3470	b2475	2593896	2594759	-	287	COG2321R	P	conserved protein	5	5	679214	659415	1.06473e+06	635072	122.629	73.143	97.8857
purC	16130401	1383166	b2476	2594927	2595640	-	237	COG0152F	P	phosphoribosylaminoimidazole-succinocarboxamide synthetase	14	14	35817116	39478756	36138076	39693636	4162.12	4571.63	4366.88
dapA	16130403	3471	b2478	2596904	2597782	-	292	COG0329EM	P	dihydrodipicolinate synthase	9	9	12366954	11972812	12507786	12225039	1440.56	1407.99	1424.27
BCP	16130405	3472	b2480	2598500	2598970	+	156	COG1225O	P	thiol peroxidase, thioredoxin-dependent	8	8	10336112	7245369	10951444	7929290	1261.31	913.239	1087.27
yfgO	16130418	1383167	b2493	2612842	2613903	-	353	COG0628R	P	predicted inner membrane permease, UPF0118 family	3	3	174286	162756	216869	179230	24.9774	20.6424	22.8099
bepA	16130419	3474	b2494	2614116	2615579	+	487	COG4783R	P	predicted peptidase, has TPR repeats	9	9	2529831	2246884	2.42818e+06	1.6681e+06	279.66	192.119	235.89
yfgD	16130420	3474	b2495	2615600	2615959	+	119	COG1393P	P	predicted oxidoreductase	3	3	408452	499504	4.9562e+06	5.76101e+06	570.819	663.512	617.166
purM	16130424	3476	b2499	2619219	2620256	+	345	COG0150F	P	phosphoribosylaminoimidazole synthetase	10	10	11272919	10091222	8626771	7.89391e+06	993.569	909.164	951.367
purN	16130425	3476	b2500	2620256	2620894	+	212	COG0299F	P	phosphoribosylglycinamide formyltransferase 1	5	5	1.70093e+06	2.0399e+06	1.86295e+06	2.54175e+06	214.561	292.74	253.65
ppk	16130426	3477	b2501	2621066	2623132	+	688	COG0855P	P	polyphosphate kinase, component of RNA degradosome	11	11	2191874	1.90451e+06	2.06047e+06	1.89184e+06	237.31	217.888	227.599
ppx	16130427	3477	b2502	2623137	2624678	+	513	COG0248FP	P	exopolyphosphatase	14	14	1.58596e+06	1.78219e+06	2.18012e+06	2324588	251.09	267.729	259.41
guaA	16130432	3479	b2507	2628980	2630557	-	525	COG0519F	P	GMP synthetase (glutamine aminotransferase)	29	29	25773808	22663168	17716312	15160373	2040.44	1746.06	1893.25
guaB	16130433	3479	b2508	2630626	2632092	-	488	COG0516F	P	IMP dehydrogenase	22	22	46834184	44518056	22905340	24305904	2638.07	2799.38	2718.73
xseA	16130434	1383170	b2509	2632254	2633624	+	456	COG1570L	P	exonuclease VII, large subunit	3	3	1.67362e+06	1306705	1.94539e+06	1.05892e+06	224.056	121.959	173.008
bamB	16130437	3481	b2512	2635496	2636674	-	392	COG1520S	P	lipoprotein required for OM biogenesis, in BamABCDE complex	12	12	9727999	10282914	9866130	10157388	1136.31	1169.85	1153.08
yfgM	16130438	3481	b2513	2636685	2637305	-	206	COG2976S	P	conserved protein, UPF0070 family	10	10	4010919	3.91167e+06	4.88357e+06	4968397	562.454	572.224	567.339
hisS	16130439	3481	b2514	2637323	2638597	-	424	COG0124J	P	histidyl tRNA synthetase	20	19	11777226	11730695	11766631	11706815	1355.2	1348.31	1351.75
ispG	16130440	3482	b2515	2638708	2639826	-	372	COG0821I	P	1-hydroxy-2-methyl-2-(E)-butenyl 4-diphosphate synthase	15	15	4.57313e+06	4521746	6359808	7622119	732.477	877.861	805.169
rodZ	16130441	3482	b2516	2639853	2640866	-	337	COG1426S	P	cytoskeletal protein required for MreB assembly	8	8	4.15441e+06	3.81608e+06	4.13701e+06	3.83503e+06	476.471	441.691	459.081
rlmN	16130442	1383171	b2517	2641151	2642305	-	384	COG0820R	P	23S rRNA m(2)A2503 methyltransferase, SAM-dependen	8	8	3.04987e+06	2.75683e+06	2320036	2.48336e+06	267.205	286.016	276.611
ndk	16130443	1383172	b2518	2642455	2642886	-	143	COG0105F	P	multifunctional nucleoside diphosphate kinase and apyrimidinic endonuclease and 3'-phosphodiesterase	6	6	18447408	26604694	14396688	19439964	1658.11	2238.96	1948.53
yfhM	16130445	3483	b2520	2645348	2650309	-	1653	COG2373R	P	conserved protein	12	12	278939	1.15441e+06	511101	413709	58.8649	47.6481	53.2565
iscX	16130449	3484	b2524	2654558	2654758	-	66	COG2975S	P	conserved protein	1	1	892985	896118
fdx	16130450	3484	b2525	2654770	2655105	-	111	COG0633C	P	[2Fe-2S] ferredoxin	3	3	1.56728e+06	1.29182e+06	2.98653e+06	2.88389e+06	343.967	332.146	338.056
hscA	16130451	3484	b2526	2655107	2656957	-	616	COG0443O	P	DnaK-like molecular chaperone specific for IscU	10	10	2.7195e+06	2572213	2.63572e+06	2.69395e+06	303.563	310.27	306.916
HSCB	16130452	3484	b2527	2656974	2657489	-	171	COG1076O	P	DnaJ-like molecular chaperone specific for IscU	3	3	882831	844635	847740	831685	97.6366	95.7875	96.7121
iscA	16130453	3484	b2528	2657585	2657908	-	107	COG0316S	P	FeS cluster assembly protein	1	1	2.47893e+06	2200668
ISCU	16130454	3484	b2529	2657925	2658311	-	128	COG0822C	P	iron-sulfur cluster assembly scaffold protein	7	7	8324535	6.87595e+06	8550987	7.15929e+06	984.841	824.555	904.698
iscR	16130456	1383173	b2531	2659665	2660153	-	162	COG1959K	P	DNA-binding transcriptional repressor	7	7	9199138	8479316	9713428	8784916	1118.72	1011.78	1065.25
trmJ	16130457	1383174	b2532	2660605	2661345	-	246	COG0565J	P	tRNA mC32/mU32 methyltransferase, SAM-dependent	6	6	2.60881e+06	2812661	2686270	2.77776e+06	309.385	319.922	314.654
suhB	16130458	1383175	b2533	2661464	2662267	+	267	COG0483G	P	inositol monophosphatase	10	10	8924799	9912345	6734821	7800708	775.668	898.429	837.049
glyA	16130476	1383178	b2551	2682276	2683529	-	417	COG0112E	P	serine hydroxymethyltransferase	23	23	108258056	128873656	75917656	89730200	8743.65	10334.5	9539.06
hmp	16130477	1383179	b2552	2683857	2685047	+	396	COG1018C	P	fused nitric oxide dioxygenase/dihydropteridine reductase 2	5	5	1.04358e+06	900965	1.38695e+06	1.10916e+06	159.738	127.745	143.742
glnB	16130478	3487	b2553	2685092	2685430	-	112	COG0347E	P	regulatory protein P-II for glutamine synthetase	5	5	6.78832e+06	7105409	6.82156e+06	7063821	785.659	813.56	799.609
glrR	16130479	3487	b2554	2685491	2686825	-	444	COG2204T	P	Response regulator regulating glmY sRNA in two-component system with sensor protein GlrK	3	3	315260	289517	244653	263953	28.1774	30.4002	29.2888
yfhG	16130480	3487	b2555	2686815	2687528	-	237	-	P	conserved protein	1	1	549038	420804
pdxJ	16130489	3490	b2564	2699020	2699751	-	243	COG0854H	P	pyridoxine 5'-phosphate synthase	6	6	1.85941e+06	2.10692e+06	1.9292e+06	2.29406e+06	222.191	264.213	243.202
era	16130491	3490	b2566	2700503	2701408	-	301	COG1159R	P	membrane-associated, 16S rRNA-binding GTPase	5	5	4341286	4362183	3614252	3627515	416.264	417.791	417.027
rnc	16130492	3490	b2567	2701405	2702085	-	226	COG0571K	P	RNase III	4	4	1416513	1.31212e+06	1.6453e+06	1.73509e+06	189.494	199.835	194.664
lepB	16130493	3491	b2568	2702357	2703331	-	324	COG0681U	P	leader peptidase (signal peptidase I)	5	5	2.8021e+06	2.6916e+06	2.75157e+06	2.70848e+06	316.906	311.943	314.425
lepa	16130494	3491	b2569	2703347	2705146	-	599	COG0481M	P	back-translocating Elongation Factor EF4, GTPase	18	18	10032015	9592783	9557191	9327807	1100.73	1074.31	1087.52
rseB	16130496	3492	b2571	2705820	2706776	-	318	COG3026T	P	anti-sigma E factor, binds RseA	8	8	2.71672e+06	2.82297e+06	2520749	2.55907e+06	290.322	294.735	292.528
rseA	16130497	3492	b2572	2706776	2707426	-	216	COG3073T	P	anti-sigma factor	6	5	6269432	1.30842e+06	1.92657e+06	2.14696e+06	221.888	247.272	234.58
rpoE	16130498	3492	b2573	2707459	2708034	-	191	COG1595K	P	RNA polymerase, sigma 24 (sigma E) factor	6	6	1.01415e+06	1.08768e+06	987344	832150	113.715	95.8411	104.778
nadB	16130499	1383180	b2574	2708442	2710064	+	540	COG0029H	P	quinolinate synthase, L-aspartate oxidase (B protein) subunit	10	10	1.64726e+06	1.85441e+06	2.07171e+06	2.1618e+06	238.605	248.98	243.792
srmB	16130501	1383181	b2576	2710918	2712252	+	444	COG0513LKJ	P	ATP-dependent RNA helicase	13	13	3355497	3.00071e+06	2948412	2641987	339.577	304.285	321.931
grcA	16130504	1383183	b2579	2714088	2714471	-	127	COG3445R	P	autonomous glycyl radical cofactor	7	7	4039720	5712454	3.19819e+06	4734475	368.345	545.283	456.814
UNG	16130505	1383184	b2580	2714776	2715465	+	229	COG0692L	P	uracil-DNA-glycosylase	4	4	992377	819016	979117	820364	112.768	94.4836	103.626
yfiF	16130506	1383185	b2581	2715513	2716550	-	345	COG0566J	P	predicted methyltransferase	8	8	3.50814e+06	2.84208e+06	5.39502e+06	4308175	621.359	496.185	558.772
kgtP	16130512	1383187	b2587	2722470	2723768	-	432	COG2814G	P	alpha-ketoglutarate transporter	3	3	20636644	10776579	14249146	10906605	1641.11	1256.14	1448.63
CLPB	16130513	1383188	b2592	2729622	2732195	-	857	COG0542O	P	protein disaggregation chaperone	38	38	10679023	8.15001e+06	10735706	8.13933e+06	1236.46	937.43	1086.95
yfiH	16130514	3495	b2593	2732325	2733056	-	243	COG1496S	P	conserved protein, UPF0124 family	2	2	462039	468842	1.07712e+06	854354	124.055	98.3983	111.227
rluD	16130515	3495	b2594	2733053	2734033	-	326	COG0564J	P	23S rRNA pseudouridine synthase; specific to U1911, U1915, and U1917	9	9	2.06782e+06	1.68513e+06	2.22035e+06	2365885	255.724	272.486	264.105
bamD	16130516	1383189	b2595	2734168	2734905	+	245	COG4105R	C	lipoprotein required for OM biogenesis, in BamABCDE complex	11	11	14244944	14378707	14985659	14414891	1725.94	1660.2	1693.07
raiA	16130518	3496	b2597	2735176	2735517	+	113	COG1544J	P	cold shock protein associated with 30S ribosomal subunit	4	4	661755	1.14577e+06	1.2111e+06	1.99418e+06	139.486	229.676	184.581
pheA	16130520	3496	b2599	2735767	2736927	+	386	COG0077E	P	fused chorismate mutase P/prephenate dehydratase	11	11	15498526	14973868	34473296	24085252	3970.39	2773.97	3372.18
tyrA	16130521	3497	b2600	2736970	2738091	-	373	COG0287E	P	fused chorismate mutase T/prephenate dehydrogenase	20	20	18377120	10047006	16015705	7.98394e+06	1844.57	919.532	1382.05
aroF	16130522	3497	b2601	2738102	2739172	-	356	COG0722E	P	3-deoxy-D-arabino-heptulosonate-7-phosphate synthase, tyrosine-repressible	16	16	38904848	27939564	29998030	21863188	3454.96	2518.04	2986.5
rplS	16130527	3499	b2606	2742205	2742552	-	115	COG0335J	P	50S ribosomal subunit protein L19	6	6	81793360	78510640	79398696	76835224	9144.57	8849.33	8996.95
trmD	16130528	3499	b2607	2742594	2743361	-	255	COG0336J	P	tRNA m(1)G37 methyltransferase, SAM-dependent	4	4	654637	846636	654396	844254	75.3687	97.2351	86.3019
rpsP	16130530	3499	b2609	2743959	2744207	-	82	COG0228J	P	30S ribosomal subunit protein S16	5	5	63560036	51762640	70880848	54978664	8163.55	6332.05	7247.8
ffh	16130531	1383190	b2610	2744456	2745817	-	453	COG0541U	P	Signal Recognition Particle (SRP) component with 4.5S RNA (ffs)	15	15	6893659	6.56822e+06	5.62513e+06	5.25676e+06	647.862	605.436	626.649
grpE	16130533	1383191	b2614	2748137	2748730	-	197	COG0576O	C	heat shock protein	8	8	20246372	16660591	20028246	16785344	2306.71	1933.22	2119.96
NADK	16130534	1383192	b2615	2748853	2749731	+	292	COG0061G	P	NAD kinase	3	3	267019	563953	384797	488504	44.3182	56.2624	50.2903
ratA	16130538	3501	b2619	2752310	2752786	-	158	COG2867I	P	toxic protein, UPF0083 family	2	2	596645	587071	547319	570814	63.0363	65.7422	64.3893
smpB	16130539	1383193	b2620	2752918	2753400	+	160	COG0691O	P	trans-translation protein	2	2	5.8947e+06	6.16608e+06	4.18941e+06	4.35675e+06	482.507	501.779	492.143
gabD	16130575	3507	b2661	2789295	2790743	+	482	COG1012C	P	succinate-semialdehyde dehydrogenase I, NADP-dependent	7	7	2.97955e+06	2981935	4.98431e+06	5.13027e+06	574.057	590.868	582.463
gabT	16130576	3507	b2662	2790757	2792037	+	426	COG0160E	P	4-aminobutyrate aminotransferase, PLP-dependent	13	12	3.11623e+06	2.95937e+06	2.98682e+06	2.47748e+06	344.001	285.338	314.669
ygaU	16130579	3509	b2665	2794359	2794808	-	149	COG1652S	P	predicted protein	8	8	13073996	10107426	10486524	8016555	1207.76	923.289	1065.53
ygaP	16130582	3510	b2668	2795542	2796066	+	174	COG0607P	P	predicted inner membrane protein with hydrolase activity	2	2	245433	157917	242111	225079	27.8846	25.923	26.9038
stpA	16130583	1383201	b2669	2796113	2796517	-	134	COG2916R	P	DNA binding protein, nucleoid-associated	6	6	18416458	17479554	33000620	30401236	3800.77	3501.4	3651.08
nrdH	16130587	3511	b2673	2798745	2798990	+	81	COG0695O	P	Hydrogen donor for NrdEF electron transport system; glutaredoxin-like protein	3	3	425372	307012	354642	246699	40.8451	28.413	34.6291
nrdI	16130588	3511	b2674	2798987	2799397	+	136	COG1780F	P	flavodoxin required for NrdEF cluster assembly	1	1	324571	230342
nrdE	16130589	3511	b2675	2799370	2801514	+	714	COG0209F	P	ribonucleoside-diphosphate reductase 2, alpha subunit	16	15	3610303	5358369	4.20037e+06	4.5712e+06	483.768	526.478	505.123
nrdF	16130590	3511	b2676	2801524	2802483	+	319	COG0208F	P	ribonucleoside-diphosphate reductase 2, beta subunit, ferritin-like protein	7	7	2.50524e+06	2.52827e+06	4338315	4.12005e+06	499.656	474.518	487.087
proV	16130591	3512	b2677	2802837	2804039	+	400	COG4175E	C	glycine betaine transporter subunit	1	1	1.02482e+06	1.49769e+06
proX	16130593	3512	b2679	2805154	2806146	+	330	COG2113E	C	glycine betaine transporter subunit	4	4	1515343	1.44924e+06	1.54392e+06	1.51167e+06	177.818	174.103	175.961
mprA	16130596	1383204	b2684	2808792	2809322	+	176	COG1846K	P	DNA-binding transcriptional repressor of microcin B17 synthesis and multidrug efflux	5	5	3.72293e+06	4217074	3.2457e+06	4247982	373.816	489.252	431.534
emrA	16130597	3514	b2685	2809449	2810621	+	390	COG1566V	C	multidrug efflux system	9	9	2.05025e+06	1.8912e+06	2.15425e+06	1.94518e+06	248.111	224.032	236.071
luxS	16130599	1383205	b2687	2812240	2812755	-	171	COG1854T	P	S-ribosylhomocysteine lyase	6	6	9026048	7.73575e+06	11779099	10060945	1356.63	1158.75	1257.69
gshA	16130600	3515	b2688	2812905	2814461	-	518	COG2918H	P	glutamate-cysteine ligase	10	10	2.47827e+06	2.10957e+06	2114141	1.92621e+06	243.492	221.847	232.669
alaS	16130604	1383207	b2697	2817403	2820033	-	876	COG0013J	P	alanyl-tRNA synthetase	44	43	14780488	13811232	12086769	10856218	1392.07	1250.34	1321.2
recA	16130606	3516	b2699	2820730	2821791	-	353	COG0468L	P	DNA strand exchange and recombination protein with protease and nuclease activity	12	12	24221246	19997472	20196892	17644996	2326.13	2032.22	2179.18
pncC	16130607	3516	b2700	2821871	2822368	-	165	COG1546R	P	conserved protein	2	2	107474	79388.7	109375	76843.6	12.597	8.85029	10.7237
mltB	16130608	1383209	b2701	2822513	2823598	-	361	COG2951M	P	membrane-bound lytic murein transglycosylase B	4	4	353397	290342	488287	627955	56.2374	72.3234	64.2804
mutS	16130640	1383214	b2733	2855115	2857676	+	853	COG0249L	P	methyl-directed mismatch repair protein	16	16	1.58819e+06	1.52976e+06	1.56128e+06	1.50529e+06	179.817	173.369	176.593
rpoS	16130648	3525	b2741	2864581	2865573	-	330	COG0568K	P	RNA polymerase, sigma S (sigma 38) factor	1	1	391549	288463
nlpD	16130649	3525	b2742	2865636	2866775	-	379	COG0739M	P	activator of AmiC murein hydrolase activity, lipoprotein	7	7	3.51791e+06	2489922	3.27225e+06	3100554	376.874	357.1	366.987
pcm	16130650	3526	b2743	2866915	2867541	-	208	COG2518O	P	L-isoaspartate protein carboxylmethyltransferase type II	1	1	343488	179402
umpG	16130651	3526	b2744	2867535	2868296	-	253	COG0496R	P	broad specificity 5'(3')-nucleotidase and polyphosphatase	2	2	281400	267107	337188	313452	38.8348	36.1011	37.468
truD	16130652	3526	b2745	2868277	2869326	-	349	COG0585S	P	tRNA(Glu) U13 pseudouridine synthase	9	9	1.72267e+06	1.55945e+06	1.66183e+06	1.52379e+06	191.398	175.5	183.449
ispF	16130653	3526	b2746	2869323	2869802	-	159	COG0245I	P	2C-methyl-D-erythritol 2,4-cyclodiphosphate synthase	2	2	2155374	2.21167e+06	1488916	1.60079e+06	171.483	184.368	177.925
ISPD	16130654	3526	b2747	2869802	2870512	-	236	COG1211I	P	4-diphosphocytidyl-2C-methyl-D-erythritol synthase	2	2	423582	379743	753307	812275	86.7604	93.552	90.1562
ftsB	16130655	3526	b2748	2870531	2870842	-	103	COG2919D	P	cell division protein	1	1	237622	207674
cysC	16130657	3527	b2750	2871409	2872014	-	201	COG0529P	P	adenosine 5'-phosphosulfate kinase	4	4	1.90572e+06	2134751	1907386	2160516	219.679	248.833	234.256
cysN	16130658	3527	b2751	2872014	2873441	-	475	COG2895P	P	sulfate adenylyltransferase, subunit 1	18	18	19744140	19014688	21834426	21578260	2514.73	2485.23	2499.98
cysD	16130659	3527	b2752	2873443	2874351	-	302	COG0175EH	P	sulfate adenylyltransferase, subunit 2	11	10	16453785	14982886	15710432	13255877	1809.41	1526.72	1668.07
cysH	16130669	3529	b2762	2885600	2886334	-	244	COG0175EH	P	3'-phosphoadenosine 5'-phosphosulfate reductase	10	10	7443112	7794246	4.87841e+06	4962715	561.86	571.57	566.715
cysI	16130670	3529	b2763	2886409	2888121	-	570	COG0155P	P	sulfite reductase, beta subunit, NAD(P)-binding, heme-binding	25	25	11589451	10645754	9362839	8653932	1078.34	996.698	1037.52
cysJ	16130671	3529	b2764	2888121	2889920	-	599	COG0369P	P	sulfite reductase, alpha subunit, flavoprotein	22	22	19836294	18731052	13304572	11790170	1532.32	1357.91	1445.12
queE	16130684	1383218	b2777	2902769	2903440	-	223	COG0602O	P	7-carboxy-7-deazaguanine synthase; queosine biosynthesis	1	1	449685	580616
eno	16130686	3533	b2779	2904665	2905963	-	432	COG0148G	P	enolase	19	19	91145464	86896280	74148096	69695248	8539.84	8027	8283.42
pyrG	16130687	3533	b2780	2906051	2907688	-	545	COG0504F	P	CTP synthetase	23	23	13039944	12904258	8453854	8439175	973.654	971.964	972.809
mazG	16130688	3534	b2781	2907916	2908707	-	263	COG3956R	P	nucleoside triphosphate pyrophosphohydrolase	2	2	1.54699e+06	1.21194e+06	258840	186467	29.8114	21.476	25.6437
RELA	16130691	3535	b2784	2909439	2911673	-	744	COG0317TK	P	(p)ppGpp synthetase I/GTP pyrophosphokinase	9	9	1.48419e+06	1.34096e+06	2628737	1.67107e+06	302.759	192.462	247.61
barA	16130693	1383219	b2786	2913079	2915835	+	918	COG4999	P	hybrid sensory histidine kinase, in two-component regulatory system with UvrY	4	4	282875	303970	341548	360824	39.337	41.5571	40.4471
gudD	16130694	3536	b2787	2916067	2917407	-	446	COG4948MR	P	(D)-glucarate dehydratase 1	2	2	166062	219662
yqcA	16130697	3537	b2790	2920557	2921006	-	149	COG0716C	P	predicted flavoprotein	2	2	1.17008e+06	1.14733e+06	1.23066e+06	1.11659e+06	141.738	128.601	135.17
yqcC	16130699	3537	b2792	2921806	2922135	-	109	COG3098S	P	conserved protein	2	2	525446	468614	416030	376035	47.9153	43.309	45.6122
syd	16130700	1383220	b2793	2922757	2923302	-	181	-	P	secY-interacting protein	1	1	138288	131627
queF	16130701	1383221	b2794	2923370	2924218	+	282	COG2904S	P	7-cyano-7-deazaguanine reductase (NADPH-dependent)	5	5	1740038	1.4979e+06	1.65881e+06	1.78109e+06	191.05	205.134	198.092
ygdH	16130702	1383222	b2795	2924330	2925694	+	454	COG1611R	P	conserved protein, UPF0717 family	14	14	4.03228e+06	3.88903e+06	3.96558e+06	3762592	456.727	433.348	445.038
sdaC	16130703	3538	b2796	2926251	2927540	+	429	COG0814E	P	predicted serine transporter	3	3	770219	588185	746846	566463	86.0164	65.2411	75.6287
rlmM	16130713	3541	b2806	2938165	2939265	-	366	COG2933R	P	23S rRNA C2498 ribose 2'-O-methyltransferase, SAM-dependent	5	5	1.99978e+06	1.84267e+06	2.38195e+06	2.42827e+06	274.336	279.671	277.004
gcvA	16130715	3541	b2808	2939672	2940589	-	305	COG0583K	P	DNA-binding transcriptional dual regulator	3	3	96518.6	80300.3	739801	718109	85.2049	82.7066	83.9558
csdA	16130717	3542	b2810	2941359	2942564	+	401	COG0520E	P	cysteine sulfinate desulfinase	2	2	116442	153478	938315	1.66317e+06	108.068	191.552	149.81
csdE	16130718	3542	b2811	2942564	2943007	+	147	COG2166R	P	CsdA-binding activator; Fe-S protein	4	4	343822	201209	399744	466756	46.0397	53.7576	49.8986
mltA	16130720	1383224	b2813	2944103	2945200	-	365	COG2821M	P	membrane-bound lytic murein transglycosylase A	6	6	478225	457925	715173	846889	82.3685	97.5386	89.9535
argA	16130722	1383225	b2818	2947264	2948595	+	443	COG0548E	P	fused acetylglutamate kinase homolog (inactive)/amino acid N-acetyltransferase	7	7	4.97205e+06	5.12606e+06	4788478	4.76603e+06	551.502	548.917	550.21
recD	16130723	3543	b2819	2948657	2950483	-	608	COG0507L	P	exonuclease V (RecBCD complex), alpha chain	2	2	133218	102895	186357	173368	21.4632	19.9672	20.7152
ptrA	16130725	3543	b2821	2954018	2956906	-	962	COG1025O	P	protease III	17	17	966463	872350	948273	853024	109.215	98.2452	103.73
recC	16130726	3544	b2822	2957082	2960450	-	1122	COG1330L	P	exonuclease V (RecBCD complex), gamma chain	7	6	550514	808179	354203	337891	40.7946	38.9159	39.8552
thyA	16130731	3545	b2827	2962383	2963177	-	264	COG0207F	P	thymidylate synthetase	6	6	4.31853e+06	3.99325e+06	4.41315e+06	4.06262e+06	508.275	467.904	488.089
lgt	16130732	3545	b2828	2963184	2964059	-	291	COG0682M	P	phosphatidylglycerol-prolipoprotein diacylglyceryl transferase	1	1	1.0196e+06	909115
ptsP	16130733	3546	b2829	2964210	2966456	-	748	COG3605T	P	fused PTS enzyme: PEP-protein phosphotransferase (enzyme I)/GAF domain containing protein	12	12	1.55965e+06	1.32807e+06	1.08396e+06	915440	124.843	105.434	115.138
rppH	16130734	3546	b2830	2966469	2966999	-	176	COG0494LR	P	RNA pyrophosphohydrolase	4	4	743766	740228	813516	825176	93.695	95.0378	94.3664
ygdR	16130737	1383228	b2833	2969293	2969511	+	72	-	P	novel lipoprotein	1	1	141758	90697.9
tas	16130738	1383229	b2834	2969619	2970659	+	346	COG0667C	P	predicted oxidoreductase, NADP(H)-dependent aldo-keto reductase; suppresses tyrosine requirement of tyrA14 O6 strain	5	5	3130000	3.56908e+06	3.01513e+06	3.47944e+06	347.262	400.736	373.999
aas	16130740	3547	b2836	2971877	2974036	-	719	COG0318IQ	P	fused 2-acylglycerophospho-ethanolamine acyl transferase/acyl-acyl carrier protein synthetase	9	9	569672	544857	3.14795e+06	3016465	362.558	347.415	354.986
galR	16130741	1383230	b2837	2974621	2975652	+	343	COG1609K	P	DNA-binding transcriptional repressor	3	3	147049	315165	804168	950754	92.6183	109.501	101.06
lysA	16130742	1383231	b2838	2975659	2976921	-	420	COG0019E	P	diaminopimelate decarboxylase, PLP-binding	8	8	3703387	3499632	3448991	3.22741e+06	397.23	371.71	384.47
lysR	16130743	1383232	b2839	2977043	2977978	+	311	COG0583K	P	DNA-binding transcriptional dual regulator	1	1	443061	377827
lysS	16130792	3558	b2890	3031679	3033196	-	505	COG1190J	P	lysine tRNA synthetase, constitutive	16	16	32977206	31200274	32053614	29793438	3691.7	3431.39	3561.55
prfB	16130793	3558	b2891	3033206	3034304	-	365	COG1186J	P	peptide chain release factor RF-2	15	15	18146288	16298841	14912397	12739233	1717.5	1467.21	1592.36
recJ	16130794	3558	b2892	3034395	3036128	-	577	COG0608L	P	ssDNA exonuclease, 5' --> 3'-specific	5	5	523826	641672	673888	662872	77.6136	76.3449	76.9792
dsbC	16130795	3558	b2893	3036134	3036844	-	236	COG1651O	P	protein disulfide isomerase II	5	5	2.0635e+06	2.14139e+06	1.92117e+06	1.99446e+06	221.266	229.708	225.487
fldB	16130797	1383242	b2895	3037877	3038398	+	173	COG0716C	P	flavodoxin 2	2	2	664670	396390	1.30468e+06	728600	150.264	83.915	117.089
ygfZ	16130800	1383243	b2898	3039335	3040315	+	326	COG0354R	P	Plumbagin resistance protein; hda suppressor; also involved in methylthio modification at 2-methylthio-6-iodeadenosine in tRNA	14	14	10362881	10066468	10248826	9961201	1180.39	1147.26	1163.82
yqfB	16130802	1383245	b2900	3041334	3041645	-	103	COG3097S	P	conserved protein, UPF0267 family	2	2	100704	151953	405442	291680	46.6958	33.5937	40.1448
bglA	16130803	1383246	b2901	3041684	3043123	+	479	COG2723G	P	6-phospho-beta-glucosidase A	15	14	8853600	7.2512e+06	7712040	6170651	888.217	710.691	799.454
gcvP	16130805	3560	b2903	3044190	3047063	-	957	COG1003E	C	glycine decarboxylase, PLP-dependent, subunit (protein P) of glycine cleavage complex	22	22	4740795	5522770	5.28575e+06	5.7193e+06	608.775	658.708	633.742
gcvT	16130807	3560	b2905	3047595	3048689	-	364	COG0404E	C	aminomethyltransferase, tetrahydrofolate-dependent, subunit (T protein) of glycine cleavage complex	8	8	5.29288e+06	6128373	5212154	5994858	600.298	690.445	645.372
ubiI	16130808	3561	b2906	3049137	3050339	-	400	COG0654HC	P	predicted oxidoreductase with FAD/NAD(P)-binding domain	6	6	853282	798351	918505	888007	105.787	102.274	104.031
ubiH	16130809	3561	b2907	3050362	3051540	-	392	COG0654HC	P	2-octaprenyl-6-methoxyphenol hydroxylase, FAD/NAD(P)-binding	3	3	517013	567358	506725	511445	58.361	58.9045	58.6328
pepP	16130810	3561	b2908	3051537	3052862	-	441	COG0006E	P	proline aminopeptidase P II	13	13	5.64927e+06	5558840	5850506	5.82476e+06	673.819	670.854	672.337
zapA	16130812	1383248	b2910	3053634	3053963	+	109	COG3027S	P	FtsZ-associated protein	1	1	992891	825553
serA	16130814	1383249	b2913	3055200	3056432	-	410	COG0111HE	P	D-3-phosphoglycerate dehydrogenase	13	13	90778240	95377936	104129744	110450296	11992.9	12720.9	12356.9
RPIA	16130815	1383250	b2914	3056688	3057347	-	219	COG0120G	P	ribose 5-phosphate isomerase, constitutive	9	9	10209031	10510053	8.32217e+06	8627613	958.488	993.666	976.077
argP	16130817	1383251	b2916	3057775	3058668	+	297	COG0583K	P	DNA-binding transcriptional activator, replication initiation inhibitor	8	8	3.04556e+06	2799859	2.02068e+06	1.90083e+06	232.727	218.924	225.825
yggE	16130823	3563	b2922	3065362	3066102	-	246	COG2968S	P	oxidative stress defense protein	7	7	2181410	1.3891e+06	2.54589e+06	1.81769e+06	293.218	209.348	251.283
mscS	16130825	1383252	b2924	3066969	3067829	-	286	COG0668M	P	mechanosensitive channel protein, small conductance	8	8	8371750	9529698	9546536	10512106	1099.5	1210.71	1155.11
fbaA	16130826	1383253	b2925	3068187	3069266	-	359	COG0191G	P	fructose-bisphosphate aldolase, class II	13	13	39266652	42113108	39174444	42125680	4511.83	4851.73	4681.78
pgk	16130827	3564	b2926	3069481	3070644	-	387	COG0126G	P	phosphoglycerate kinase	21	21	89164144	86719088	101770016	89970328	11721.1	10362.1	11041.6
epd	16130828	3564	b2927	3070694	3071713	-	339	COG0057G	P	D-erythrose 4-phosphate dehydrogenase	8	7	1.53687e+06	1.42973e+06	1.1307e+06	991248	130.226	114.165	122.195
speB	16130838	1383254	b2937	3080899	3081819	-	306	COG0010E	P	agmatinase	8	8	5550010	6012155	4.02082e+06	4.47627e+06	463.09	515.545	489.317
speA	16130839	3566	b2938	3081957	3083933	-	658	COG1166E	P	biosynthetic arginine decarboxylase, PLP-binding	18	18	10362341	10017911	13679387	13129593	1575.49	1512.17	1543.83
metK	16130843	1383256	b2942	3084728	3085882	+	384	COG0192H	P	S-adenosylmethionine synthetase	17	17	57397544	47599804	49191252	38414744	5665.49	4424.33	5044.91
gshB	16130848	3568	b2947	3089900	3090850	+	316	COG0189HJ	P	glutathione synthetase	13	13	2724152	2819696	2780602	2.89104e+06	320.25	332.97	326.61
yqgF	16130850	3569	b2949	3091522	3091938	+	138	COG0816L	P	predicted Holliday junction resolvase	2	2	1.11069e+06	1218473	888895	837791	102.377	96.4907	99.4336
yggS	16130852	3570	b2951	3093120	3093824	+	234	COG0325R	P	predicted enzyme, binds pyridoxal 5'-phosphate	6	6	1789272	1.77468e+06	1.60826e+06	1.71005e+06	185.227	196.952	191.09
rdgB	16130855	3570	b2954	3094703	3095296	+	197	COG0127F	P	dITP/XTP pyrophosphatase	5	4	3.53184e+06	3.14262e+06	3549621	3.19706e+06	408.82	368.215	388.517
yggN	16130859	1383260	b2958	3098926	3099645	-	239	-	P	predicted protein	6	6	1.32935e+06	1.28996e+06	2659634	2025222	306.318	233.251	269.784
trmI	16130861	3571	b2960	3100155	3100874	-	239	COG0220R	P	tRNA m(7)G46 methyltransferase, SAM-dependent	4	4	2.94554e+06	2.61641e+06	3289428	2801273	378.853	322.63	350.742
mutY	16130862	3572	b2961	3101035	3102087	+	350	COG1194L	P	adenine DNA glycosylase	1	1	12175722	9792668
yggX	16130863	3572	b2962	3102115	3102390	+	91	COG2924CO	P	protein that protects iron-sulfur proteins against oxidative damage	7	7	2.17476e+06	3.10436e+06	2367062	3.37996e+06	272.621	389.279	330.95
glcB	16130876	3574	b2976	3119656	3121827	-	723	COG2225C	P	malate synthase G	17	17	3510995	3.4231e+06	3.60688e+06	3.50696e+06	415.414	403.907	409.66
GLCG	16130877	3574	b2977	3121849	3122253	-	134	COG3193R	P	conserved protein	1	1	52524.1	29014.1
yghS	16130885	3575	b2985	3131266	3131979	-	237	COG0125F	P	predicted ATP-binding protein	1	1	52368952	54492272
GSS	16130888	1383268	b2988	3134685	3136544	-	619	COG0754E	P	fused glutathionylspermidine amidase/glutathionylspermidine synthetase	11	11	3.5724e+06	2.6766e+06	3591317	2.70903e+06	413.622	312.007	362.814
hybD	16130893	3576	b2993	3138814	3139308	-	164	COG0680C	C	maturation protease for hydrogenase 2	1	1	76026.1	74806.5
hybC	16130894	3576	b2994	3139308	3141011	-	567	COG0374C	C	hydrogenase 2, large subunit	7	7	289024	252234	14584507	17087390	1679.74	1968	1823.87
gpR	16130899	1383270	b3001	3145919	3146959	+	346	COG0667C	P	L-glyceraldehyde 3-phosphate reductase	4	4	533975	548361	585863	549151	67.4755	63.2473	65.3614
yqhA	16130900	1383271	b3002	3146999	3147493	-	164	COG2862S	P	predicted inner membrane protein, UPF0114 family	1	1	2.18373e+06
yghA	16130901	1383272	b3003	3147684	3148568	+	294	COG1028IQR	P	predicted oxidoreductase	5	5	675319	565820	600577	404213	69.1701	46.5544	57.8622
exbD	16130903	3577	b3005	3148840	3149265	-	141	COG0848U	C	membrane spanning protein in TonB-ExbB-ExbD complex	6	6	8018645	7409148	3652075	3.73265e+06	420.62	429.9	425.26
exbB	16130904	3577	b3006	3149272	3150006	-	244	COG0811U	C	membrane spanning protein in TonB-ExbB-ExbD complex	7	7	14748257	15523263	14386120	15009638	1656.89	1728.7	1692.8
metC	16130906	1383273	b3008	3150258	3151445	+	395	COG0626E	P	cystathionine beta-lyase, PLP-dependent	11	11	9137178	9205230	9106919	9206385	1048.87	1060.33	1054.6
yqhD	16130909	3578	b3011	3153377	3154540	+	387	COG1979C	P	aldehyde reductase, NADPH-dependent	19	19	26046398	18890438	25747866	15181690	2965.45	1748.52	2356.99
ftsP	16130913	3580	b3017	3159279	3160691	-	470	COG2132Q	P	septal ring component that protects the divisome from stress; multicopy suppressor of ftsI(Ts)	6	6	565914	642800	812479	857363	93.5755	98.7449	96.1602
plsC	16130914	3580	b3018	3160766	3161503	-	245	COG0204I	P	1-acyl-sn-glycerol-3-phosphate acyltransferase	3	3	1.81004e+06	1559214	2489662	2295333	286.741	264.36	275.551
parC	16130915	1383275	b3019	3161737	3163995	-	752	COG0188L	P	DNA topoisomerase IV, subunit A	13	13	3724020	3.72199e+06	3.89867e+06	3.49674e+06	449.021	402.73	425.875
mqsA	16130917	3581	b3021	3165873	3166268	-	131	COG2944K	C	antitoxin for MqsR toxin; predicted transcriptional regulator	4	4	371588	322992	343814	278109	39.598	32.0305	35.8143
ygiW	16130920	3582	b3024	3167306	3167698	-	130	COG3111S	P	conserved protein	2	2	384744	216481	610565	296346	70.3204	34.131	52.2257
mdaB	16130924	3584	b3028	3170552	3171133	+	193	COG2249R	P	NADPH quinone reductase	4	4	1.02739e+06	880790	1.39064e+06	1.30189e+06	160.164	149.942	155.053
ygiN	16130925	3584	b3029	3171164	3171478	+	104	COG1359S	P	quinol monooxygenase	1	1	4715186	6.50697e+06
parE	16130926	3585	b3030	3171526	3173418	-	630	COG0187L	P	DNA topoisomerase IV, subunit B	9	8	4278586	3.99317e+06	4.60023e+06	4305343	529.822	495.858	512.84
cpdA	16130928	3585	b3032	3174028	3174855	-	275	COG1409R	P	3',5' cAMP phosphodiesterase	1	1	1.18696e+06	1.34116e+06
nudF	16130930	3585	b3034	3175303	3175932	-	209	COG2816L	P	ADP-ribose pyrophosphatase	6	6	600587	772605	633856	746120	73.0029	85.9328	79.4678
ygiC	16130934	3586	b3038	3178443	3179603	+	386	COG0754E	P	Glutathionylspermidine synthase homolog	8	7	1.8428e+06	2.13915e+06	1.89571e+06	1.9807e+06	218.334	228.123	223.228
ribB	16130937	1383279	b3041	3181835	3182488	-	217	COG0108H	P	3,4-dihydroxy-2-butanone-4-phosphate synthase	3	3	1.41706e+06	1.51108e+06	1.63485e+06	1.85993e+06	188.29	214.213	201.252
hldE	16130948	3590	b3052	3193342	3194775	-	477	COG2870M	P	fused heptose 7-phosphate kinase/heptose 1-phosphate adenyltransferase	19	19	5947744	5.81606e+06	5.90842e+06	5.50473e+06	680.49	633.995	657.242
glnE	16130949	3590	b3053	3194823	3197663	-	946	COG1391OT	P	fused deadenylyltransferase/adenylyltransferase for glutamine synthetase	11	11	855127	631636	899847	857953	103.638	98.8128	101.225
ygiF	16130950	3590	b3054	3197686	3198987	-	433	COG3025S	P	predicted adenylate cyclase	9	9	3.23101e+06	2.93391e+06	2.67791e+06	2.43439e+06	308.422	280.375	294.399
ygiM	16130951	3591	b3055	3199229	3199849	+	206	COG3103T	P	SH3 domain protein	8	8	4506863	3.85753e+06	4.98187e+06	6.14967e+06	573.775	708.274	641.025
cca	16130952	3591	b3056	3199913	3201151	+	412	COG0617J	P	fused tRNA nucleotidyl transferase/2'3'-cyclic phosphodiesterase/2'nucleotidase and phosphatase	4	4	928808	921555	1.14453e+06	1.09677e+06	131.819	126.318	129.068
plsY	16130955	1383283	b3059	3202716	3203333	+	205	COG0344S	P	probable glycerol-3-phosphate acyltransferase	1	1	461781	500507
tsaD	16130960	1383285	b3064	3207552	3208565	-	337	COG0533O	P	t(6)A tRNA modification protein; glycation-binding protein; genome maintenance protein	6	6	2.07824e+06	2.06846e+06	2.21398e+06	2.17343e+06	254.991	250.32	252.655
rpsU	16130961	1383286	b3065	3208803	3209018	+	71	COG0828J	P	30S ribosomal subunit protein S21	5	5	128627352	107491784	96645160	84062528	11130.9	9681.72	10406.3
dnaG	16130962	1383287	b3066	3209129	3210874	+	581	COG0358L	P	DNA primase	7	7	763462	671933	694220	651373	79.9552	75.0205	77.4878
rpoD	16130963	1383288	b3067	3211069	3212910	+	613	COG0568K	C	RNA polymerase, sigma 70 (sigma D) factor	14	14	8653433	7.65808e+06	5697569	5844028	656.205	673.073	664.639
mug	16130964	1383289	b3068	3212989	3213495	-	168	COG3663L	P	G/U mismatch-specific DNA glycosylase; xanthine DNA glycosylase	7	7	2.08715e+06	2123328	1.94112e+06	1.90145e+06	223.565	218.995	221.28
yqjH	16130965	1383290	b3070	3213749	3214513	-	254	COG2375P	P	predicted siderophore interacting protein	6	6	4.04775e+06	5588442	5355282	5208004	616.783	599.82	608.302
yqjI	16130966	1383291	b3071	3214801	3215424	+	207	COG1695K	P	predicted transcriptional regulator, PadR family	2	2	787935	541857	1.25081e+06	892937	144.059	102.842	123.451
aer	16130967	1383292	b3072	3215578	3217098	-	506	COG0840NT	P	fused signal transducer for aerotaxis sensory component/methyl accepting chemotaxis component	7	7	895027	937334	866839	926898	99.8363	106.753	103.295
ebgR	16130970	1383294	b3075	3219488	3220471	+	327	COG1609K	P	DNA-binding transcriptional repressor	3	3	938470	879890	359268	369053	41.3779	42.5049	41.9414
higA	16130977	3595	b3082	3231750	3232166	-	138	COG5499K	P	antitoxinof the HigB-HigA toxin-antitoxin system	1	1	461796	423535
sstT	16130984	1383296	b3089	3237966	3239210	+	414	COG3633E	P	sodium:serine/threonine symporter	1	1	4809449	4.43584e+06
uxaC	16130987	3597	b3092	3241351	3242763	-	470	COG1904G	P	uronate isomerase	4	4	1.2203e+06	1.3146e+06	2.5942e+06	1.0008e+06	298.782	115.265	207.023
yqjA	16130990	3598	b3095	3245795	3246457	+	220	COG0586S	P	required, with yghB, for membrane integrity; inner membrane protein	1	1	363870	106600
yqjD	16130993	3599	b3098	3247397	3247702	+	101	COG4575S	P	conserved protein	2	2	12146274	12859790	8861220	9745532	1020.57	1122.42	1071.5
yqjE	16130994	3599	b3099	3247705	3248109	+	134	COG5393S	P	inner membrane protein, DUF1469 family	1	1	192434	404392
yqjG	16130997	1383299	b3102	3249046	3250032	+	328	COG0435O	P	predicted S-transferase	4	4	648286	595497	775209	661277	89.283	76.1611	82.7221
yhaJ	16131000	1383302	b3105	3251340	3252236	-	298	COG0583K	P	predicted DNA-binding transcriptional regulator	6	6	777707	912755	1.12321e+06	1304982	129.364	150.298	139.831
prlF	16131021	3604	b3129	3275024	3275359	+	111	COG2002K	P	antitoxin of the SohA(PrlF)-YhaV toxin-antitoxin system	1	1	444511	426801
agaR	16131023	1383306	b3131	3275878	3276687	-	269	COG1349KG	P	DNA-binding transcriptional repressor of the aga regulon	4	4	208383	219962	455783	485735	52.4938	55.9434	54.2186
rsmI	16131038	1383308	b3146	3290497	3291357	-	286	COG0313R	P	16S rRNA C1402 ribose 2'-O-methyltransferase, SAM-dependent	12	12	576111	597595	638138	717447	73.4962	82.6304	78.0633
lpoA	16131039	3609	b3147	3291422	3293458	+	678	COG3107R	P	conserved protein	15	14	10356121	7509121	2.94847e+06	2753089	339.583	317.081	328.332
diaA	16131041	3609	b3149	3293831	3294421	+	196	COG0279G	P	DnaA initiator-associating factor for replication initiation	2	2	324726	279536	505236	486330	58.1894	56.0119	57.1007
yraP	16131042	3609	b3150	3294431	3295006	+	191	COG2823R	P	OM lipoprotein	8	8	7931108	7.07926e+06	6935361	6224070	798.765	716.844	757.804
yraQ	16131043	3610	b3151	3295120	3296160	-	346	COG0701R	P	predicted permease	2	2	230506	177351	229766	181518	26.4628	20.9059	23.6844
yhbP	16131046	1383309	b3154	3297494	3297937	-	147	COG3787S	P	conserved protein, UPF0306 family	1	1	772883	825525
yhbS	16131048	3611	b3156	3298277	3298780	-	167	COG3153R	P	predicted acyltransferase with acyl-CoA N-acyltransferase domain	1	1	899992	763573
yhbW	16131052	3612	b3160	3301470	3302477	+	335	COG2141C	P	predicted enzyme	5	5	556453	469029	1.06308e+06	793318	122.437	91.3686	106.903
MTR	16131053	1383311	b3161	3302595	3303839	-	414	COG0814E	P	tryptophan transporter of high affinity	1	1	21898.7	21675.7
nlpI	16131055	1383312	b3163	3306062	3306946	-	294	COG4785R	P	lipoprotein involved in osmotic sensitivity and filamentation	4	4	547681	683218	539804	671393	62.1707	77.3262	69.7485
rpsO	16131057	1383313	b3165	3309437	3309706	-	89	COG0184J	P	30S ribosomal subunit protein S15	4	4	106290376	101646592	110088656	102215744	12679.2	11772.5	12225.8
truB	16131058	3614	b3166	3309855	3310799	-	314	COG0130J	P	tRNA U55 pseudouridine synthase	4	4	1.05952e+06	981262	1.1107e+06	1.14941e+06	127.922	132.381	130.152
RBFA	16131059	3614	b3167	3310799	3311200	-	133	COG0858J	P	30s ribosome binding factor	7	7	9900169	10762987	8.32734e+06	9220065	959.083	1061.9	1010.49
infB	16131060	3615	b3168	3311364	3314036	-	890	COG0532J	P	fused protein chain initiation factor 2, IF2: membrane protein/conserved protein	47	47	26656974	24986492	22390372	20706690	2578.76	2384.85	2481.8
nusA	16131061	3615	b3169	3314061	3315548	-	495	COG0195K	P	transcription termination/antitermination L factor	24	23	23358948	22028726	15969889	15477695	1839.3	1782.61	1810.95
argG	16131063	1383314	b3172	3316659	3318002	+	447	COG0137E	P	argininosuccinate synthetase	26	26	53512784	65455552	50925448	62071760	5865.23	7148.98	6507.1
secG	16131065	1383315	b3175	3320195	3320527	-	110	COG1314U	P	preprotein translocase membrane subunit	3	3	8543616	8511223	8475866	12774644	976.189	1471.29	1223.74
glmM	16131066	3616	b3176	3320755	3322092	-	445	COG1109G	P	phosphoglucosamine mutase	21	20	12662318	10648358	10070832	8965972	1159.89	1032.64	1096.26
ftsH	16131068	3616	b3178	3323023	3324957	-	644	COG0465O	P	protease, ATP-dependent zinc-metallo	30	30	14295674	12810244	14583296	13025967	1679.6	1500.24	1589.92
rlmE	16131069	1383316	b3179	3325057	3325686	-	209	COG0293J	P	23S rRNA U2552 ribose 2'-O-methyltransferase, SAM-dependent	5	5	2.07845e+06	1.98666e+06	1.76382e+06	1649243	203.144	189.948	196.546
yhbY	16131070	1383317	b3180	3325812	3326105	+	97	COG1534J	P	RNA binding protein associated with pre-50S ribosomal subunits	3	3	6549072	7811461	6419110	7.80163e+06	739.307	898.536	818.921
dacB	16131072	1383318	b3182	3326985	3328418	+	477	COG2027M	P	D-alanyl-D-alanine carboxypeptidase	2	2	561611	569098	1.01935e+06	1.00361e+06	117.402	115.589	116.495
obgE	16131073	3617	b3183	3328604	3329776	-	390	COG0536R	P	GTPase involved in cell partioning and DNA repair	8	7	2.91852e+06	2.00021e+06	3.20159e+06	2227173	368.736	256.51	312.623
rpmA	16131075	3618	b3185	3330884	3331141	-	85	COG0211J	C	50S ribosomal subunit protein L27	3	3	42325732	39692312	58245092	49540968	6708.25	5705.77	6207.01
rplU	16131076	3618	b3186	3331162	3331473	-	103	COG0261J	C	50S ribosomal subunit protein L21	6	6	132368712	147904224	117994816	126892752	13589.8	14614.6	14102.2
ispB	16131077	1383319	b3187	3331732	3332703	+	323	COG0142H	P	octaprenyl diphosphate synthase	3	3	2.46305e+06	2.43638e+06	2.5041e+06	2.39915e+06	288.404	276.316	282.36
murA	16131079	3619	b3189	3333257	3334516	-	419	COG0766M	P	UDP-N-acetylglucosamine 1-carboxyvinyltransferase	12	12	7.89241e+06	8.13965e+06	7.90679e+06	8.0242e+06	910.647	924.17	917.408
mlaC	16131082	3620	b3192	3335278	3335913	-	211	COG2854Q	C	ABC transporter maintaining OM lipid asymmetry, periplasmic binding protein	10	9	6.07968e+06	6.99597e+06	4.02419e+06	5.1723e+06	463.477	595.708	529.593
mlaD	16131083	3620	b3193	3335932	3336483	-	183	COG1463Q	C	ABC transporter maintaining OM lipid asymmetry, anchored periplasmic binding protein	4	4	3.32332e+06	2830588	6431168	5281417	740.696	608.276	674.486
mlaE	16131084	3620	b3194	3336488	3337270	-	260	COG0767Q	C	ABC transporter maintaining OM lipid asymmetry, inner membrane permease protein	2	2	583244	557549	462484	403957	53.2656	46.5249	49.8952
mlaF	16131085	3620	b3195	3337278	3338087	-	269	COG1127Q	C	ABC transporter maintaining OM lipid asymmetry, ATP-binding protein	5	5	2.34227e+06	1.971e+06	1.9903e+06	1.67937e+06	229.228	193.418	211.323
kdsD	16131087	3621	b3197	3339288	3340274	+	328	COG0794M	P	D-arabinose 5-phosphate isomerase	5	5	2211476	2.25909e+06	1.69554e+06	1.8024e+06	195.28	207.587	201.433
kdsC	16131088	3621	b3198	3340295	3340861	+	188	COG1778R	P	3-deoxy-D-manno-octulosonate 8-phosphate phosphatase	2	2	1.38263e+06	1.3867e+06	610910	750440	70.3602	86.4303	78.3952
lptC	16131089	3621	b3199	3340858	3341433	+	191	COG3117S	P	lipopolysaccharide export, IM-tethered periplasmic protein of the LptBFGC export complex	2	2	1.49682e+06	1346311	879682	972198	101.315	111.971	106.643
lptA	16131090	3621	b3200	3341402	3341959	+	185	COG1934S	P	periplasmic LPS-binding protein	2	2	3148155	3.13036e+06	2.12502e+06	2.09339e+06	244.744	241.102	242.923
lptB	16131091	3621	b3201	3341966	3342691	+	241	COG1137R	P	lipopolysaccharide export ABC transporter ATP-binding protein of the LptBFGC export complex	9	9	5.33905e+06	5095446	5.35726e+06	5093353	617.011	586.616	601.813
rpoN	16131092	3621	b3202	3342739	3344172	+	477	COG1508K	P	RNA polymerase, sigma 54 (sigma N) factor	7	7	1803577	1.87953e+06	1.52863e+06	1680846	176.056	193.588	184.822
hpf	16131093	3621	b3203	3344195	3344482	+	95	COG1544J	P	ribosome hibernation promoting factor HPF; stabilizes 70S dimers (100S)	3	3	3391415	2.70109e+06	3227579	2.56256e+06	371.729	295.137	333.433
ptsN	16131094	3622	b3204	3344600	3345091	+	163	COG1762GT	P	sugar-specific enzyme IIA component of PTS	7	7	3.8585e+06	3773631	3.85302e+06	3.77871e+06	443.764	435.205	439.484
yhbJ	16131095	3622	b3205	3345137	3345991	+	284	COG1660R	P	glmZ(sRNA)-inactivating NTPase, glucosamine-6-phosphate regulated	9	9	1771098	1.49932e+06	1.91801e+06	1.77207e+06	220.903	204.095	212.499
gltD	16131103	3625	b3213	3357220	3358638	+	472	COG0493ER	C	glutamate synthase, 4Fe-4S protein, small subunit	23	23	27339036	29020534	23832686	26299446	2744.88	3028.98	2886.93
nanA	16131115	1383326	b3225	3370705	3371598	-	297	COG0329EM	P	N-acetylneuraminate lyase	1	1	346630	318974
sspB	16131118	3628	b3228	3374301	3374798	-	165	COG2969R	P	ClpXP protease specificity-enhancing factor	2	2	2.21874e+06	2.1068e+06	2302479	2071495	265.183	238.58	251.881
sspA	16131119	3628	b3229	3374804	3375442	-	212	COG0625O	P	stringent starvation protein A	10	10	16762228	18083234	10156604	11169405	1169.76	1286.41	1228.09
rpsI	16131120	3629	b3230	3375837	3376229	-	130	COG0103J	C	30S ribosomal subunit protein S9	5	5	144315072	135670544	87191144	81592168	10042	9397.2	9719.62
rplM	16131121	3629	b3231	3376245	3376673	-	142	COG0102J	C	50S ribosomal subunit protein L13	8	8	56968936	57837156	44813680	43944600	5161.32	5061.22	5111.27
zapE	16131122	1383328	b3232	3376892	3378019	-	375	COG1485R	P	conserved protein with nucleoside triphosphate hydrolase domain	12	12	2.12912e+06	2.02022e+06	2.16155e+06	2.00987e+06	248.952	231.482	240.217
degQ	16131124	3630	b3234	3378765	3380132	+	455	COG0265O	P	serine endoprotease, periplasmic	15	15	4745158	4.5379e+06	4209841	3893218	484.859	448.393	466.626
degS	16131125	3630	b3235	3380222	3381289	+	355	COG0265O	P	serine endoprotease, periplasmic	7	7	873803	835106	910249	857120	104.836	98.7169	101.776
mdh	16131126	1383329	b3236	3381352	3382290	-	312	COG0039C	P	malate dehydrogenase, NAD(P)-binding	16	15	94414608	98141208	95224016	97183032	10967.2	11192.8	11080
argR	16131127	1383330	b3237	3382725	3383195	+	156	COG1438K	P	DNA-binding transcriptional dual regulator, L-arginine-binding	3	3	180189	325874	454607	388896	52.3584	44.7902	48.5743
aaeR	16131133	1383332	b3243	3387542	3388471	+	309	COG0583K	P	transcriptional regulator for aaeXAB operon	1	1	92124	115116
tldD	16131134	1383333	b3244	3388605	3390050	-	481	COG0312R	P	predicted peptidase	9	9	2.68238e+06	2.7497e+06	2384409	2.43609e+06	274.619	280.572	277.595
yhdE	16131136	3632	b3248	3395807	3396400	-	197	COG0424D	P	Maf-like protein	6	6	640148	678690	666764	673870	76.7931	77.6115	77.2023
mreC	16131138	3632	b3250	3396897	3398000	-	367	COG1792M	P	cell wall structural complex MreBCD transmembrane component MreC	10	10	2869041	1190280	1.79984e+06	1483676	207.293	170.879	189.086
acuI	16131141	1383335	b3253	3401506	3402480	+	324	COG0604CR	P	predicted oxidoreductase, Zn-dependent and NAD(P)-binding	10	10	3.75895e+06	3.06758e+06	3.74981e+06	3121535	431.877	359.516	395.696
accB	16131143	3633	b3255	3403458	3403928	+	156	COG0511I	P	acetyl CoA carboxylase, BCCP subunit	4	4	15318373	17768634	16924044	19458818	1949.19	2241.13	2095.16
accC	16131144	3633	b3256	3403939	3405288	+	449	COG0439I	P	acetyl-CoA carboxylase, biotin carboxylase subunit	15	15	11442171	11454797	10647578	11919158	1226.31	1372.76	1299.54
prmA	16131147	3634	b3259	3407092	3407973	+	293	COG2264J	P	methyltransferase for 50S ribosomal subunit protein L11	3	3	1497006	1321533	1507756	1.35034e+06	173.652	155.523	164.588
fis	16131149	3635	b3261	3409293	3409589	+	98	COG2901KL	P	global DNA-binding transcriptional dual regulator	2	2	9295338	12076884	9278494	12103900	1068.63	1394.04	1231.34
yrdB	16131161	3638	b3280	3427788	3428045	-	85	-	P	conserved protein	1	1	366192	153716
aroE	16131162	3638	b3281	3428042	3428860	-	272	COG0169E	P	dehydroshikimate reductase, NAD(P)-binding	4	4	251478	332342	908593	1.04996e+06	104.645	120.927	112.786
tsaC	16131163	3638	b3282	3428865	3429437	-	190	COG0009J	P	tRNA(ANN) t(6)A37 threonylcarbamoyladenosine modification protein	2	2	976960	1.08075e+06	953663	695057	109.836	80.0517	94.9439
def	16131166	3639	b3287	3431712	3432221	+	169	COG0242J	P	peptide deformylase	6	6	4.04594e+06	4.03589e+06	4.35337e+06	4211421	501.39	485.041	493.215
fmt	16131167	3639	b3288	3432236	3433183	+	315	COG0223J	P	10-formyltetrahydrofolate:L-methionyl-tRNA(fMet) N-formyltransferase	9	9	2.42041e+06	2.48414e+06	2680539	2.76314e+06	308.725	318.239	313.482
rsmb	16131168	3639	b3289	3433229	3434518	+	429	COG0144J	P	16S rRNA m(5)C967 methyltransferase, S-adenosyl-L-methionine-dependent	6	6	936057	719619	1.22266e+06	1.07628e+06	140.817	123.959	132.388
trkA	16131169	3639	b3290	3434540	3435916	+	458	COG0569P	P	NAD-binding component of TrK potassium transporter	5	5	1.32432e+06	1.46495e+06	1.41477e+06	1.60613e+06	162.943	184.983	173.963
mscL	16131170	1383339	b3291	3436046	3436456	+	136	COG1970M	P	mechanosensitive channel protein, high conductance	6	6	9330768	6005543	8597591	5.66441e+06	990.209	652.386	821.297
zntR	16131171	3640	b3292	3436727	3437152	-	141	COG0789K	P	DNA-binding transcriptional activator in response to Zn(II)	1	1	274035	335347
rplQ	16131173	3641	b3294	3437638	3438021	-	127	COG0203J	C	50S ribosomal subunit protein L17	6	6	166549552	146913008	114832616	106513296	13225.6	12267.4	12746.5
rpoA	16131174	3641	b3295	3438062	3439051	-	329	COG0202K	C	RNA polymerase, alpha subunit	20	19	57837416	62472348	47818676	50640160	5507.41	5832.37	5669.89
rpsD	16131175	3641	b3296	3439077	3439697	-	206	COG0522J	C	30S ribosomal subunit protein S4	13	13	209804592	179849296	167757264	150288448	19321.1	17309.1	18315.1
rpsK	16131176	3641	b3297	3439731	3440120	-	129	COG0100J	C	30S ribosomal subunit protein S11	5	5	86871616	101939824	108940328	120404128	12547	13867.3	13207.1
rpsM	16131177	3641	b3298	3440137	3440493	-	118	COG0099J	C	30S ribosomal subunit protein S13	8	8	93473640	90396632	96215024	91875648	11081.4	10581.6	10831.5
rpmJ	16131178	3642	b3299	3440640	3440756	-	38	COG0257J	C	50S ribosomal subunit protein L36	1	1	2474176	2.11957e+06
secY	16131179	3642	b3300	3440788	3442119	-	443	COG0201U	C	preprotein translocase membrane subunit	3	3	3.75091e+06	4482584	5.15254e+06	5.64932e+06	593.432	650.648	622.04
rplO	16131180	3642	b3301	3442127	3442561	-	144	COG0200J	C	50S ribosomal subunit protein L15	8	8	129533664	117859720	130013200	116047272	14974	13365.5	14169.7
rpmD	16131181	3642	b3302	3442565	3442744	-	59	COG1841J	C	50S ribosomal subunit protein L30	4	4	58220744	59932484	56240804	52671184	6477.41	6066.29	6271.85
rpsE	16131182	3642	b3303	3442748	3443251	-	167	COG0098J	C	30S ribosomal subunit protein S5	10	10	93871352	92479400	94110424	92781280	10839	10685.9	10762.4
rplR	16131183	3642	b3304	3443266	3443619	-	117	COG0256J	C	50S ribosomal subunit protein L18	5	5	83233384	83681728	83364312	81209072	9601.3	9353.08	9477.19
rplF	16131184	3642	b3305	3443629	3444162	-	177	COG0097J	C	50S ribosomal subunit protein L6	9	9	140938912	137596352	110932952	111428976	12776.5	12833.6	12805
rpsH	16131185	3642	b3306	3444175	3444567	-	130	COG0096J	C	30S ribosomal subunit protein S8	8	8	84797408	85055216	98301248	100738320	11321.6	11602.3	11462
rpsN	16131186	3642	b3307	3444601	3444906	-	101	COG0199J	C	30S ribosomal subunit protein S14	3	3	49441040	22572148	57241208	30116252	6592.63	3468.57	5030.6
rplE	16131187	3642	b3308	3444921	3445460	-	179	COG0094J	C	50S ribosomal subunit protein L5	17	16	138987232	138419616	110752384	109533336	12755.7	12615.3	12685.5
rplX	16131188	3642	b3309	3445475	3445789	-	104	COG0198J	C	50S ribosomal subunit protein L24	6	6	92303864	95398056	74439232	77184544	8573.38	8889.56	8731.47
rplN	16131189	3642	b3310	3445800	3446171	-	123	COG0093J	C	50S ribosomal subunit protein L14	6	6	63082644	61680992	61742004	60028608	7111	6913.66	7012.33
rpsQ	16131190	3643	b3311	3446336	3446590	-	84	COG0186J	C	30S ribosomal subunit protein S17	2	2	59084096	74859656	31344292	37757100	3610.01	4348.59	3979.3
rpmC	16131191	3643	b3312	3446590	3446781	-	63	COG0255J	C	50S ribosomal subunit protein L29	3	2	25653378	27874934	11390916	9055314	1311.92	1042.93	1177.42
rplP	16131192	3643	b3313	3446781	3447191	-	136	COG0197J	C	50S ribosomal subunit protein L16	5	5	46811952	46010264	25147340	28187724	2896.29	3246.46	3071.37
rpsC	16131193	3643	b3314	3447204	3447905	-	233	COG0092J	C	30S ribosomal subunit protein S3	10	10	99619200	88435088	140476016	124042960	16179	14286.4	15232.7
rplV	16131194	3643	b3315	3447923	3448255	-	110	COG0091J	C	50S ribosomal subunit protein L22	8	8	99465600	93553952	77278376	72035320	8900.37	8296.51	8598.44
rpsS	16131195	3643	b3316	3448270	3448548	-	92	COG0185J	C	30S ribosomal subunit protein S19	4	4	80602048	75115768	84372016	78359208	9717.36	9024.85	9371.11
rplB	16131196	3643	b3317	3448565	3449386	-	273	COG0090J	C	50S ribosomal subunit protein L2	14	14	124820216	104745080	64391228	54564516	7416.12	6284.35	6850.23
rplW	16131197	3643	b3318	3449404	3449706	-	100	COG0089J	C	50S ribosomal subunit protein L23	2	2	6361784	6731297	5.26955e+06	6144930	606.909	707.729	657.319
rplD	16131198	3643	b3319	3449703	3450308	-	201	COG0088J	C	50S ribosomal subunit protein L4	6	6	149469840	139348048	109350984	108169168	12594.3	12458.1	12526.2
rplC	16131199	3643	b3320	3450319	3450948	-	209	COG0087J	C	50S ribosomal subunit protein L3	10	9	111984712	110565360	97854688	105266048	11270.2	12123.8	11697
rpsJ	16131200	3643	b3321	3450981	3451292	-	103	COG0051J	C	30S ribosomal subunit protein S10	6	5	171394080	168096352	150831264	144603328	17371.7	16654.4	17013
bfr	16131215	1383340	b3336	3464271	3464747	-	158	COG2193P	P	bacterioferritin, iron storage and detoxification protein	5	5	2.20313e+06	1.81482e+06	2.11495e+06	1.79924e+06	243.585	207.223	225.404
fusA	16131219	3646	b3340	3469422	3471536	-	704	COG0480J	P	protein chain elongation factor EF-G, GTP-binding	33	32	98712624	93466600	59881112	58447724	6896.68	6731.59	6814.13
rpsG	16131220	3646	b3341	3471564	3472103	-	179	COG0049J	P	30S ribosomal subunit protein S7	10	10	119298776	107728240	75145688	67956960	8654.74	7826.79	8240.77
rpsL	16131221	3646	b3342	3472200	3472574	-	124	COG0048J	P	30S ribosomal subunit protein S12	4	4	39048868	26672244	71277528	65344284	8209.23	7525.88	7867.56
fkpA	16131226	1383343	b3347	3474629	3475441	-	270	COG0545O	P	FKBP-type peptidyl-prolyl cis-trans isomerase (rotamase)	12	12	27615696	28945324	19955624	21264158	2298.35	2449.05	2373.7
slyX	16131227	1383344	b3348	3475662	3475880	+	72	COG2900S	P	protein required for phi X174 lysis	1	1	313725	322789
slyD	16131228	1383345	b3349	3475929	3476519	-	196	COG1047O	P	FKBP-type peptidyl prolyl cis-trans isomerase (rotamase)	5	5	18450922	15130050	17972628	14775850	2069.96	1701.78	1885.87
kefB	16131229	3648	b3350	3476824	3478629	-	601	COG0475P	P	potassium:proton antiporter	1	1	219326	177296
kefG	16131230	3648	b3351	3478629	3479183	-	184	COG2249R	P	potassium-efflux system ancillary protein for KefB, glutathione-regulated	1	1	730098	542444
yheS	16131231	3649	b3352	3479311	3481224	+	637	COG0488R	P	fused predicted transporter subunits of ABC superfamily: ATP-binding components	15	15	1.20631e+06	1.31148e+06	1.56135e+06	1.49946e+06	179.825	172.697	176.261
prkB	16131234	3649	b3355	3482512	3483381	+	289	COG3954C	P	predicted phosphoribulokinase	3	3	1.14176e+06	873438	1.15668e+06	990043	133.218	114.026	123.622
yhfA	16131235	1383346	b3356	3483436	3483840	-	134	COG1765O	P	conserved protein, OsmC family	3	3	1.43242e+06	1.41884e+06	1.38097e+06	1.45593e+06	159.051	167.684	163.367
CRP	16131236	3650	b3357	3484142	3484774	+	210	COG0664T	P	DNA-binding transcriptional dual regulator	11	11	28492434	27935192	23621338	24397668	2720.54	2809.95	2765.24
argD	16131238	3651	b3359	3486982	3488202	-	406	COG4992E	P	bifunctional acetylornithine aminotransferase/ succinyldiaminopimelate aminotransferase	14	14	13741642	13912703	17541816	16545329	2020.34	1905.57	1962.96
PPIA	16131242	1383347	b3363	3489747	3490319	-	190	COG0652O	P	peptidyl-prolyl cis-trans isomerase A (rotamase A)	5	5	884164	1.02924e+06	1.28511e+06	1.67855e+06	148.01	193.324	170.667
cysG	16131246	3653	b3368	3495850	3497223	+	457	COG0007H	P	fused siroheme synthase 1,3-dimethyluroporphyriongen III dehydrogenase and siroheme ferrochelatase/uroporphyrinogen methyltransferase	7	7	1.11988e+06	1.27825e+06	1.01442e+06	1.2417e+06	116.833	143.01	129.922
trpS	16131262	3656	b3384	3510656	3511660	-	334	COG0180J	P	tryptophanyl-tRNA synthetase	11	11	15619969	13844458	10762335	9335034	1239.53	1075.14	1157.34
gph	16131263	3656	b3385	3511653	3512411	-	252	COG0546R	P	phosphoglycolate phosphatase	5	5	554453	513409	675341	654393	77.7809	75.3682	76.5746
RPE	16131264	3656	b3386	3512404	3513081	-	225	COG0036G	P	D-ribulose-5-phosphate 3-epimerase	7	7	4.3214e+06	3.945e+06	3.98578e+06	3.81748e+06	459.054	439.67	449.362
dam	16131265	3656	b3387	3513099	3513935	-	278	COG0338L	P	DNA adenine methyltransferase	1	1	157528	160250
damX	16131266	3656	b3388	3514042	3515328	-	428	COG3266S	P	cell division protein that binds to the septal ring	15	15	6.10433e+06	4.49284e+06	5924025	4.39176e+06	682.287	505.811	594.049
aroB	16131267	3656	b3389	3515420	3516508	-	362	COG0337E	P	3-dehydroquinate synthase	12	12	2.7949e+06	2.60786e+06	3.14231e+06	2.37151e+06	361.909	273.133	317.521
nudE	16131274	1383350	b3397	3523611	3524171	-	186	COG0494LR	P	adenosine nucleotide hydrolase; substrates include Ap3A, Ap2A, ADP-ribose, NADH	5	5	1.35086e+06	1.71332e+06	1.4078e+06	1.76584e+06	162.14	203.376	182.758
yrfF	16131275	3658	b3398	3524491	3526626	+	711	-	P	inner membrane protein	8	8	807129	689830	850026	754649	97.8999	86.9151	92.4075
pck	16131280	1383352	b3403	3530840	3532462	+	540	COG1866C	P	phosphoenolpyruvate carboxykinase	21	21	6700306	5866449	4.08841e+06	4021211	470.874	463.134	467.004
ompR	16131282	3659	b3405	3533887	3534606	-	239	COG0745TK	P	DNA-binding response regulator in two-component regulatory system with EnvZ	10	10	7.4237e+06	7.26342e+06	6078276	6109935	700.052	703.698	701.875
feoB	16131285	3660	b3409	3538429	3540750	+	773	COG0370P	P	fused ferrous iron transporter, protein B: GTP-binding protein/membrane protein	11	11	1.99384e+06	1712575	2.00964e+06	1.75659e+06	231.456	202.312	216.884
bioH	16131288	1383354	b3412	3542096	3542866	-	256	COG0596R	P	pimeloyl-ACP carboxylesterase	3	3	678797	683711	1.11937e+06	1.24562e+06	128.921	143.462	136.191
nfuA	16131290	3661	b3414	3543646	3544221	+	191	COG0694O	P	Fe/S biogenesis protein; possible scaffold/chaperone for damaged Fe/S proteins	6	6	12824207	8188378	15005724	10116183	1728.25	1165.11	1446.68
malQ	16131292	3662	b3416	3546008	3548092	-	694	COG1640G	P	4-alpha-glucanotransferase (amylomaltase)	10	10	1.9312e+06	1.65438e+06	1589441	1.5968e+06	183.06	183.908	183.484
malT	16131294	1383355	b3418	3551107	3553812	+	901	COG2909K	C	DNA-binding transcriptional activator for the mal regulon and maltotriose-ATP-binding protein	4	4	180928	178263	163918	163215	18.879	18.798	18.8385
RTCB	16131295	3663	b3421	3554875	3556101	-	408	COG1690S	P	conserved protein	2	2	68076.3	43878.8
glgP	16131302	3665	b3428	3562157	3564604	-	815	COG0058G	P	glycogen phosphorylase	16	16	4.06814e+06	3.29422e+06	3.00185e+06	2932666	345.731	337.763	341.747
glgA	16131303	3665	b3429	3564623	3566056	-	477	COG0297G	P	glycogen synthase	9	8	5783664	4.69432e+06	5141339	4188847	592.142	482.441	537.292
glgC	16131304	3665	b3430	3566056	3567351	-	431	COG0448G	P	glucose-1-phosphate adenylyltransferase	12	12	7.72358e+06	7545523	6701736	6472083	771.858	745.408	758.633
glgX	16131305	3665	b3431	3567369	3569342	-	657	COG1523G	P	glycogen debranching enzyme	6	6	964485	1.03036e+06	1.00679e+06	1.03913e+06	115.955	119.679	117.817
glgB	16131306	3665	b3432	3569339	3571525	-	728	COG0296G	P	1,4-alpha-glucan branching enzyme	10	10	2.3719e+06	2362462	2.55577e+06	2.39777e+06	294.356	276.158	285.257
asd	16131307	1383358	b3433	3571798	3572901	-	367	COG0136E	P	aspartate-semialdehyde dehydrogenase, NAD(P)-binding	15	15	45384672	56199624	43627376	47848400	5024.69	5510.83	5267.76
yhhW	16131311	1383360	b3439	3576973	3577668	-	231	COG1741R	P	quercetinase activity in vitro	4	4	605383	312710	610776	683057	70.3447	78.6696	74.5072
yhhX	16131312	1383361	b3440	3577791	3578828	-	345	COG0673R	P	predicted oxidoreductase with NAD(P)-binding Rossmann-fold domain	7	7	1.99616e+06	1.94934e+06	2.66593e+06	2.63916e+06	307.042	303.959	305.501
ggt	16131319	1383365	b3447	3583104	3584846	-	580	COG0405E	P	gamma-glutamyltranspeptidase	3	3	288477	380722	663350	951022	76.3999	109.532	92.9659
yhhA	16131320	1383366	b3448	3584966	3585406	+	146	-	P	conserved protein, DUF2756 family	1	1	23782	50906.6
ugpQ	16131321	3668	b3449	3585393	3586136	-	247	COG0584C	C	glycerophosphodiester phosphodiesterase, cytosolic	1	1	77354.6	88092.6
ugpB	16131325	3668	b3453	3589032	3590348	-	438	COG1653G	C	glycerol-3-phosphate transporter subunit	7	7	352354	251839	891755	670318	102.706	77.2024	89.9541
livG	16131327	3669	b3455	3591462	3592229	-	255	COG0411E	C	leucine/isoleucine/valine transporter subunit	11	12	5.90602e+06	6382847	5755547	6254976	662.883	720.403	691.643
livK	16131330	3669	b3458	3594474	3595583	-	369	COG0683E	C	leucine transporter subunit	16	16	37210768	43187776	29431664	37947356	3389.73	4370.5	3880.12
panM	16131331	1383367	b3459	3596007	3596390	+	127	-	P	pantothenate synthesis protein, predicted acetyltransferase	2	2	531437	466948	414687	362137	47.7607	41.7083	44.7345
ftsX	16131334	3670	b3462	3599051	3600109	-	352	COG2177D	C	predicted transporter subunit: membrane component of ABC superfamily	6	6	5250695	5134298	5.34508e+06	5324230	615.608	613.207	614.407
ftsE	16131335	3670	b3463	3600102	3600770	-	222	COG2884D	C	predicted transporter subunit: ATP-binding component of ABC superfamily	5	5	2.11225e+06	2.12519e+06	5.89655e+06	6281329	679.123	723.438	701.281
ftsY	16131336	3670	b3464	3600773	3602266	-	497	COG0552U	C	Signal Recognition Particle (SRP) receptor	18	18	5409073	4.07864e+06	5448722	4.07529e+06	627.545	469.363	548.454
rsmD	16131337	3671	b3465	3602416	3603012	+	198	COG0742L	P	16S rRNA m(2)G966 methyltransferase, SAM-dependent	1	1	458214	415231
yhhM	16131339	1383369	b3467	3603274	3603633	-	119	-	P	conserved protein, DUF2500 family	4	4	457121	359710	472414	356326	54.4093	41.039	47.7242
zntA	16131341	3672	b3469	3604474	3606672	+	732	COG2217P	P	zinc, cobalt and lead efflux system	2	2	698731	492803	742738	510259	85.5432	58.768	72.1556
nikR	16131353	3675	b3481	3616611	3617012	+	133	COG0864K	C	DNA-binding transcriptional repressor, Ni-binding	1	1	183100	162286
yhiI	16131359	3677	b3487	3627558	3628625	-	355	COG1566V	P	predicted membrane fusion protein (MFP) of efflux pump	5	5	3.72201e+06	3.03611e+06	3.05456e+06	2.4751e+06	351.802	285.064	318.433
yhiN	16131364	1383373	b3492	3634231	3635433	-	400	COG2081R	P	predicted oxidoreductase with FAD/NAD(P)-binding domain	2	2	325780	241241	297550	228571	34.2696	26.3252	30.2974
pitA	16131365	1383374	b3493	3635665	3637164	+	499	COG0306P	P	phosphate transporter, low-affinity	3	3	1.45622e+06	1.23819e+06	1.40071e+06	1.16391e+06	161.324	134.051	147.687
uspA	16131367	1383376	b3495	3638134	3638568	+	144	COG0589T	P	universal stress global response regulator	5	5	6.03692e+06	6.59133e+06	5965725	6510448	687.089	749.827	718.458
rsmJ	16131369	3678	b3497	3640403	3641155	-	250	-	P	predicted SAM-dependent methyltransferase	2	2	312019	191825	509532	267275	58.6843	30.7828	44.7335
prlC	16131370	3678	b3498	3641163	3643205	-	680	COG0339E	P	oligopeptidase A	26	26	10175222	9733992	10186444	9643538	1173.2	1110.67	1141.94
rlmJ	16131371	3679	b3499	3643408	3644250	+	280	COG2961R	P	protein required for the utilization of DNA as a carbon source, predicted DNA processing protein	7	7	1.59376e+06	1.65524e+06	948279	978134	109.216	112.654	110.935
GOR	16131372	3679	b3500	3644322	3645674	+	450	COG1249C	P	glutathione oxidoreductase	13	13	4.46653e+06	4.31309e+06	4.07578e+06	4.10846e+06	469.419	473.183	471.301
yhjA	16131390	1383387	b3518	3665814	3667211	-	465	COG1858P	P	predicted cytochrome C peroxidase	1	1	1.31202e+06	855866
treF	16131391	1383388	b3519	3667615	3669264	+	549	COG1626G	P	cytoplasmic trehalase	1	1	311389	211626
yhjD	16131394	3682	b3522	3671385	3672398	+	337	COG1295S	P	putative alternate lipid exporter, suppressor of msbA and KDO essentiality, inner membrane protein	2	2	578218	456448	585936	453690	67.4839	52.2528	59.8683
yhjE	16131395	1383390	b3523	3672809	3674131	+	440	COG2211G	P	inner membrane protein, predicted transporter	4	4	11027319	9720274	7130033	6318716	821.186	727.744	774.465
yhjJ	16131399	1383391	b3527	3678467	3679963	-	498	COG0612R	P	predicted zinc-dependent peptidase	16	16	1.06247e+06	1.1422e+06	1765288	1.2476e+06	203.313	143.689	173.501
dctA	16131400	1383392	b3528	3680184	3681470	-	428	COG1301C	P	C4-dicarboxylic acid, orotate and citrate transporter	4	4	502565	522859	357428	390439	41.1659	44.9679	43.0669
bcsZ	16131403	3684	b3531	3687178	3688284	-	368	COG3405G	P	endo-1,4-D-glucanase	2	2	61474.9	67222.1	1.56419e+06	331539	180.153	38.1842	109.168
bcsB	16131404	3684	b3532	3688291	3690630	-	779	-	P	regulator of cellulose synthase, cyclic di-GMP binding	5	5	137818	124169	354395	2.53652e+06	40.8167	292.139	166.478
BCSE	16131408	3685	b3536	3694481	3696052	+	523	-	P	cellulose production protein	2	1	1.27466e+06	1.15122e+06
dppF	16131412	3686	b3540	3699887	3700891	-	334	COG4608E	C	dipeptide transporter	3	3	1.63629e+06	1.92404e+06	1.80666e+06	2.09975e+06	208.079	241.835	224.957
dppD	16131413	3686	b3541	3700888	3701871	-	327	COG0444EP	C	dipeptide/heme transporter	10	10	4162119	4533835	3.46259e+06	3.70777e+06	398.797	427.034	412.915
dppC	16131414	3686	b3542	3701882	3702784	-	300	COG1173EP	C	dipeptide/heme transporter	2	2	459239	389412	432182	304601	49.7757	35.0817	42.4287
dppB	16131415	3686	b3543	3702794	3703813	-	339	COG0601EP	C	dipeptide/heme transporter	1	1	5.72553e+06	4.24941e+06
dppA	16131416	1383395	b3544	3704121	3705728	-	535	COG0747E	C	dipeptide transporter	23	22	75256608	77269136	66511972	68979976	7660.37	7944.62	7802.49
tag	16131420	3687	b3549	3711115	3711678	+	187	COG2818L	P	3-methyl-adenine DNA glycosylase I, constitutive	1	1	81285.1	105181
cspA	16131427	1383398	b3556	3718072	3718284	+	70	COG1278K	P	RNA chaperone and anti-terminator, cold-inducible	1	1	1.05237e+06	1.33964e+06
glyS	16131430	3690	b3559	3720351	3722420	-	689	COG0751J	C	glycine tRNA synthetase, beta subunit	35	36	20012914	20727094	12728659	13657794	1466	1573.01	1519.5
glyQ	16131431	3690	b3560	3722430	3723341	-	303	COG0752J	C	glycine tRNA synthetase, alpha subunit	7	7	10091952	9786583	9280722	9748972	1068.89	1122.82	1095.85
yiaJ	16131445	3692	b3574	3739707	3740555	-	282	COG1414K	P	DNA-binding transcriptional repressor of yiaK-S operon	5	5	861476	708904	468562	489748	53.9657	56.4057	55.1857
selB	16131461	3696	b3590	3756040	3757884	-	614	COG3276J	P	selenocysteinyl-tRNA-specific translation factor	14	14	1.51479e+06	1.44642e+06	1.62189e+06	1532340	186.797	176.484	181.641
selA	16131462	3696	b3591	3757881	3759272	-	463	COG1921E	P	selenocysteine synthase	10	10	1.43145e+06	1.32133e+06	1.36538e+06	1.3056e+06	157.255	150.369	153.812
yibF	16131463	1383406	b3592	3759370	3759978	-	202	COG0625O	P	glutathione S-transferase homolog	4	4	1.02906e+06	1.09623e+06	1.91678e+06	2.50928e+06	220.761	289.001	254.881
mtlA	16131470	1383408	b3599	3770304	3772217	+	637	COG2213G	C	fused mannitol-specific PTS enzymes: IIA components/IIB components/IIC components	11	11	3.36218e+06	3.20105e+06	2741130	2.54905e+06	315.704	293.581	304.643
mtlD	16131471	3699	b3600	3772447	3773595	+	382	COG0246G	P	mannitol-1-phosphate dehydrogenase, NAD-dependent	10	10	1.47947e+06	1350264	1376432	1.64778e+06	158.528	189.78	174.154
yibL	16131473	1383409	b3602	3774688	3775050	+	120	-	P	conserved protein, ribosome-associated	2	2	3015876	3.46287e+06	3.01634e+06	3468760	347.401	399.507	373.454
lldD	16131476	3700	b3605	3777850	3779040	+	396	COG1304C	P	L-lactate dehydrogenase, FMN-linked	7	6	1.06823e+06	990960	1.67869e+06	1.45646e+06	193.339	167.744	180.542
cysE	16131478	3701	b3607	3779764	3780585	-	273	COG1045E	P	serine acetyltransferase	7	7	3.08323e+06	3.48705e+06	2.99296e+06	3.15984e+06	344.708	363.928	354.318
gpsA	16131479	3701	b3608	3780665	3781684	-	339	COG0240C	P	glycerol-3-phosphate dehydrogenase (NAD+)	3	3	1490127	1.42684e+06	1.22769e+06	1139292	141.397	131.215	136.306
secB	16131480	3701	b3609	3781684	3782151	-	155	COG1952U	P	protein export chaperone	4	4	23420544	23273568	20273832	19670636	2334.99	2265.52	2300.26
grxC	16131481	3701	b3610	3782214	3782465	-	83	COG0695O	P	glutaredoxin 3	3	3	2.50897e+06	3.93173e+06	2.02695e+06	3208059	233.449	369.481	301.465
yibN	16131482	1383411	b3611	3782607	3783038	-	143	COG0607P	P	predicted rhodanese-related sulfurtransferase	7	7	10831795	10778969	5.85684e+06	6.04996e+06	674.549	696.791	685.67
gpmM	16131483	3702	b3612	3783283	3784827	+	514	COG0696G	P	phosphoglycero mutase III, cofactor-independent	15	13	19195070	19935602	20309320	20643206	2339.08	2377.54	2358.31
tdh	16131487	3703	b3616	3788343	3789368	-	341	COG1063ER	P	threonine 3-dehydrogenase, NAD(P)-binding	8	8	1.36998e+06	1.13774e+06	1.3478e+06	1.12156e+06	155.23	129.173	142.201
kbl	16131488	3703	b3617	3789378	3790574	-	398	COG0156H	P	glycine C-acetyltransferase	7	7	558160	533594	530645	581686	61.1158	66.9944	64.0551
hldD	16131490	3704	b3619	3792010	3792942	+	310	COG0451MG	P	ADP-L-glycero-D-mannoheptose-6-epimerase, NAD(P)-binding	18	18	15075074	16991510	9099945	10111805	1048.07	1164.61	1106.34
waaF	16131491	3704	b3620	3792952	3793998	+	348	COG0859M	P	ADP-heptose:LPS heptosyltransferase II	6	6	2.58217e+06	2.28012e+06	2533848	2234846	291.83	257.393	274.612
waaL	16131493	3704	b3622	3794971	3796230	+	419	COG3307M	P	O-antigen ligase	2	2	717063	693671	719610	692816	82.8795	79.7935	81.3365
waaU	16131494	3705	b3623	3796262	3797335	-	357	COG0859M	P	lipopolysaccharide core biosynthesis	1	1	607096	457469
waaY	16131496	3705	b3625	3798290	3798988	-	232	COG0661R	P	lipopolysaccharide core biosynthesis protein	2	2	846984	709443	852533	653532	98.1887	75.2691	86.7289
waaO	16131498	3706	b3627	3800062	3801081	-	339	COG1442M	P	UDP-D-galactose:(glucosyl)lipopolysaccharide-alpha-1,3-D-galactosyltransferase	1	1	374288	335057
waaP	16131501	3706	b3630	3803176	3803973	-	265	-	P	kinase that phosphorylates core heptose of lipopolysaccharide	1	1	657837	604296
waaG	16131502	3706	b3631	3803966	3805090	-	374	COG0438M	P	glucosyltransferase I	2	2	216683	174012	184988	1.23315e+06	21.3056	142.025	81.6653
coaD	16131505	3707	b3634	3807848	3808327	+	159	COG0669H	P	pantetheine-phosphate adenylyltransferase	1	1	85744.5	267720
rpmG	16131507	3708	b3636	3809273	3809440	-	55	COG0267J	C	50S ribosomal subunit protein L33	2	2	38451848	42163848	39183920	41627324	4512.92	4794.34	4653.63
rpmB	16131508	3708	b3637	3809461	3809697	-	78	COG0227J	C	50S ribosomal subunit protein L28	5	5	159781952	119779680	127713512	104775736	14709.1	12067.3	13388.2
DUT	16131511	3709	b3640	3811955	3812410	+	151	COG0756F	P	deoxyuridinetriphosphatase	3	3	3580149	3.28053e+06	4.31851e+06	3.77261e+06	497.375	434.502	465.939
pyrE	16131513	1383414	b3642	3813150	3813791	-	213	COG0461F	P	orotate phosphoribosyltransferase	2	2	398616	451227	272254	415906	31.3562	47.9011	39.6287
yicC	16131515	1383415	b3644	3814699	3815562	+	287	COG1561S	P	conserved protein, UPF0701 family	14	14	5.9165e+06	5.99726e+06	4.1809e+06	4.06869e+06	481.526	468.602	475.064
gmk	16131519	3710	b3648	3819451	3820074	+	207	COG0194F	P	guanylate kinase	3	3	1.45166e+06	1.54883e+06	1754832	1935672	202.109	222.937	212.523
rpoZ	16131520	3710	b3649	3820129	3820404	+	91	COG1758K	P	RNA polymerase, omega subunit	8	8	7.52108e+06	8.34178e+06	6300734	6877628	725.673	792.116	758.894
spoT	16131521	3710	b3650	3820423	3822531	+	702	COG0317TK	P	bifunctional (p)ppGpp synthetase II/ guanosine-3',5'-bis pyrophosphate 3'-pyrophosphohydrolase	7	7	1.0722e+06	904288	1.35251e+06	1.225e+06	155.772	141.087	148.429
trmH	16131522	3710	b3651	3822538	3823227	+	229	COG0566J	P	tRNA mG18-2'-O-methyltransferase, SAM-dependen	2	2	158888	247894	649666	487159	74.8238	56.1075	65.4656
recG	16131523	3710	b3652	3823233	3825314	+	693	COG1200LK	P	ATP-dependent DNA helicase	6	6	334752	649583	524096	574401	60.3616	66.1553	63.2585
yicH	16131526	1383418	b3655	3828480	3830189	+	569	-	P	conserved protein	10	10	1.76232e+06	1.66545e+06	1.62088e+06	1.58061e+06	186.681	182.043	184.362
nlpA	16131531	1383421	b3661	3837198	3838016	-	272	COG1464P	P	cytoplasmic membrane lipoprotein-28	4	4	9307237	8205202	10596771	8941835	1220.46	1029.86	1125.16
uhpA	16131539	3713	b3669	3848159	3848749	-	196	COG2197TK	P	DNA-binding response regulator in two-component regulatory system wtih UhpB	1	1	1.02148e+06	1.04293e+06
ilvN	16131540	3714	b3670	3848825	3849115	-	96	COG0440E	C	acetolactate synthase I, small subunit	5	5	2.73751e+06	3.14939e+06	1.74349e+06	1840231	200.803	211.945	206.374
ilvB	16131541	3714	b3671	3849119	3850807	-	562	COG0028EH	C	acetolactate synthase I, large subunit	16	16	13983066	14488291	13950295	14568306	1606.69	1677.87	1642.28
ibpA	16131555	3717	b3687	3865032	3865445	-	137	COG0071O	P	heat shock chaperone	2	2	2.66768e+06	1.66264e+06	1.11887e+06	735454	128.864	84.7043	106.784
yidA	16131565	1383427	b3697	3874163	3874975	-	270	COG0561R	P	sugar phosphate phosphatase; substrates include erythrose 4-P and mannose 1-P phosphatase	10	10	2.96843e+06	3.14545e+06	2.37456e+06	2511155	273.485	289.217	281.351
dnaN	16131569	3719	b3701	3879244	3880344	-	366	COG0592L	P	DNA polymerase III, beta subunit	9	8	3.03429e+06	3058480	1.45462e+06	1.67151e+06	167.532	192.513	180.022
dnaA	16131570	3719	b3702	3880349	3881752	-	467	COG0593L	P	chromosomal replication initiator protein DnaA, DNA-binding transcriptional dual regulator	8	8	2.09343e+06	1.95459e+06	1.78523e+06	1.59684e+06	205.61	183.913	194.761
rpmH	16131571	3720	b3703	3882359	3882499	+	46	COG0230J	P	50S ribosomal subunit protein L34	1	1	118369784	125764088
rnpA	16131572	3720	b3704	3882516	3882875	+	119	COG0594J	P	protein C5 component of RNase P	2	2	281610	455834
yidC	16131573	3720	b3705	3883099	3884745	+	548	COG0706U	P	membrane protein insertase	14	14	5.58815e+06	5949836	4.3496e+06	4776830	500.955	550.161	525.558
mnmE	16131574	1383428	b3706	3884851	3886215	+	454	COG0486R	P	GTPase	8	8	67472144	67367584	1.15617e+06	1068654	133.159	123.08	128.119
chrR	16131581	3722	b3713	3892675	3893241	+	188	COG0431R	P	chromate reductase, Class I, flavoprotein	2	2	537493	614416	677331	545017	78.0102	62.7711	70.3906
yieH	16131583	3723	b3715	3894797	3895462	+	221	COG0637R	P	phosphoenolpyruvate and 6-phosphogluconate phosphatase	2	2	67168.8	100106	52178.8	88921.1	6.00958	10.2413	8.12544
phoU	16131592	3725	b3724	3904876	3905601	-	241	COG0704P	P	negative regulator of PhoR/PhoB two-component regulator	8	8	2.30661e+06	2241628	2464197	2194462	283.808	252.742	268.275
pstB	16131593	3725	b3725	3905616	3906389	-	257	COG1117P	P	phosphate transporter subunit	3	3	1.12891e+06	1.10081e+06	1.29935e+06	1.33163e+06	149.649	153.367	151.508
pstS	16131596	3726	b3728	3908508	3909548	-	346	COG0226P	C	periplasmic phosphate binding protein, high-affinity	8	8	2319412	1.3312e+06	2.36984e+06	1.32413e+06	272.941	152.504	212.722
glmS	16131597	1383433	b3729	3909862	3911691	-	609	COG0449M	P	L-glutamine:D-fructose-6-phosphate aminotransferase	22	22	14178452	12042073	14112738	9584830	1625.4	1103.91	1364.66
glmU	16131598	1383434	b3730	3911853	3913223	-	456	COG1207M	P	fused N-acetyl glucosamine-1-phosphate uridyltransferase/glucosamine-1-phosphate acetyl transferase	10	10	1.8492e+06	1.98532e+06	2.00954e+06	2.29889e+06	231.445	264.769	248.107
atpC	16131599	3727	b3731	3913576	3913995	-	139	COG0355C	C	F1 sector of membrane-bound ATP synthase, epsilon subunit	4	4	1.86729e+06	1.627e+06	1.78827e+06	1597016	205.96	183.933	194.946
atpD	16131600	3727	b3732	3914016	3915398	-	460	COG0055C	C	F1 sector of membrane-bound ATP synthase, beta subunit	26	26	47750732	47977720	53658188	53772484	6179.96	6193.13	6186.55
atpG	16131601	3727	b3733	3915425	3916288	-	287	COG0224C	C	F1 sector of membrane-bound ATP synthase, gamma subunit	17	17	30533468	27853652	24900982	22282842	2867.92	2566.38	2717.15
atpA	16131602	3727	b3734	3916339	3917880	-	513	COG0056C	C	F1 sector of membrane-bound ATP synthase, alpha subunit	23	23	87479680	90371664	43879932	45265748	5053.78	5213.38	5133.58
atpH	16131603	3727	b3735	3917893	3918426	-	177	COG0712C	C	F1 sector of membrane-bound ATP synthase, delta subunit	5	5	10010904	11543631	8089930	9510267	931.74	1095.32	1013.53
atpF	16131604	3727	b3736	3918441	3918911	-	156	COG0711C	C	F0 sector of membrane-bound ATP synthase, subunit b	12	12	33913892	27583284	33290976	26787112	3834.22	3085.15	3459.68
atpE	16131605	3728	b3737	3918973	3919212	-	79	COG0636C	P	F0 sector of membrane-bound ATP synthase, subunit c	1	1	36497948	15483025
rsmG	16131608	3729	b3740	3921080	3921703	-	207	COG0357M	P	16S rRNA m(7)G527 methyltransferase, SAM-dependent; glucose-inhibited cell-division protein	5	5	783397	859584	906084	992087	104.356	114.261	109.309
mnmG	16131609	3729	b3741	3921767	3923656	-	629	COG0445D	P	5-methylaminomethyl-2-thiouridine modification at tRNA U34	13	13	3.6672e+06	3556876	3116592	3335249	358.947	384.13	371.538
mioC	16131610	1383435	b3742	3924035	3924478	-	147	COG0716C	P	FMN-binding protein MioC	3	3	3.10853e+06	3.03991e+06	1113743	928740	128.273	106.966	117.619
asnC	16131611	1383436	b3743	3924568	3925026	-	152	COG1522K	P	DNA-binding transcriptional dual regulator	2	2	302811	256928	193459	165035	22.2812	19.0075	20.6444
asnA	16131612	1383437	b3744	3925178	3926170	+	330	COG2502E	P	asparagine synthetase A	12	12	8.01963e+06	9662050	6.13052e+06	7.72346e+06	706.069	889.532	797.801
rbsA	16131617	3731	b3749	3931801	3933306	+	501	COG1129G	C	fused D-ribose transporter subunits of ABC superfamily: ATP-binding components	6	6	499238	698690	2.09164e+06	2.10463e+06	240.9	242.396	241.648
rbsB	16131619	3731	b3751	3934301	3935191	+	296	COG1879G	C	D-ribose transporter subunit	14	14	26491378	24843928	26738602	24607474	3079.56	2834.11	2956.84
rbsK	16131620	3732	b3752	3935317	3936246	+	309	COG0524G	P	ribokinase	2	2	45578.6	90438.1	128536	157704	14.8039	18.1632	16.4836
yifE	16131624	1383438	b3764	3946109	3946447	+	112	COG3085S	P	conserved protein, UPF0438 family	10	10	10237866	11652601	9376307	10658594	1079.9	1227.58	1153.74
ilvA	16131630	3735	b3772	3953354	3954898	+	514	COG1171E	P	threonine deaminase	19	19	4323830	4.29937e+06	4.28465e+06	4.00047e+06	493.475	460.745	477.11
ilvC	16131632	1383440	b3774	3955993	3957468	+	491	COG0059EH	P	ketol-acid reductoisomerase, NAD(P)-binding	29	29	168020576	175110816	109057544	109049464	12560.5	12559.5	12560
PPIC	16131633	1383441	b3775	3957555	3957836	-	93	COG0760O	P	peptidyl-prolyl cis-trans isomerase C (rotamase C)	2	2	2.93429e+06	4201368	1.43778e+06	2.09721e+06	165.593	241.541	203.567
rhlB	16131636	1383442	b3780	3962388	3963653	-	421	COG0513LKJ	C	ATP-dependent RNA helicase	16	16	9304866	9716689	7.53844e+06	7.75706e+06	868.223	893.402	880.813
RHO	16131639	1383443	b3783	3964440	3965699	+	419	COG1158K	P	transcription termination factor	22	22	33436626	32472964	26264500	26099468	3024.96	3005.95	3015.45
wecA	16131640	3736	b3784	3965939	3967042	+	367	COG0472M	P	UDP-GlcNAc:undecaprenylphosphate GlcNAc-1-phosphate transferase	2	2	1.43274e+06	1.50325e+06	1.5691e+06	1.54428e+06	180.718	177.859	179.289
rffH	16131645	3736	b3789	3971631	3972512	+	293	COG1209M	P	glucose-1-phosphate thymidylyltransferase	2	2	369297	323935	191434	312356	22.048	35.975	29.0115
wecE	16131647	3736	b3791	3973169	3974299	+	376	COG0399M	P	TDP-4-oxo-6-deoxy-D-glucose transaminase	3	4	774428	1.18422e+06	873791	958851	100.637	110.434	105.535
wecG	16131650	3736	b3794	3977979	3978719	+	246	COG1922M	P	UDP-N-acetyl-D-mannosaminuronic acid transferase	7	7	1.25168e+06	1.36971e+06	980496	880906	112.927	101.456	107.191
hemY	16131654	3737	b3802	3984709	3985905	-	398	COG3071H	P	predicted protoheme IX synthesis protein	9	9	2.77188e+06	2.33698e+06	2.45994e+06	2.00872e+06	283.318	231.35	257.334
hemX	16131655	3737	b3803	3985908	3987089	-	393	COG2959H	P	predicted uroporphyrinogen III methyltransferase	17	17	6905622	7.65832e+06	4565490	5.61048e+06	525.82	646.175	585.998
hemD	16131656	3737	b3804	3987111	3987851	-	246	COG1587H	P	uroporphyrinogen III synthase	3	3	467769	301293	534853	520427	61.6005	59.9391	60.7698
cyaA	16131658	1383445	b3806	3989176	3991722	+	848	COG3072F	P	adenylate cyclase	13	13	997242	870878	976787	850644	112.499	97.9711	105.235
cyaY	16131659	1383446	b3807	3991762	3992082	-	106	COG1965P	P	iron-dependent inhibitor of iron-sulfur cluster formation; frataxin; iron-binding and oxidizing protein	1	1	519607	627221
yigA	16131662	3738	b3810	3993606	3994313	+	235	COG3159S	P	conserved protein, DUF484 family	6	5	1.66511e+06	1.62626e+06	1.3702e+06	1.2492e+06	157.81	143.874	150.842
yigB	16131664	3738	b3812	3995206	3995922	+	238	COG1011R	P	FMN phosphatase	4	4	247975	217763	296498	268153	34.1485	30.8839	32.5162
uvrD	16131665	1383447	b3813	3996006	3998168	+	720	COG0210L	C	DNA-dependent ATPase I and helicase II	12	12	953261	799538	1.20774e+06	1.0657e+06	139.099	122.739	130.919
corA	16131666	1383448	b3816	3999449	4000399	+	316	COG0598P	P	magnesium/nickel/cobalt transporter	4	4	2682465	2.52785e+06	2681115	2.53761e+06	308.792	292.264	300.528
pldA	16131671	1383450	b3821	4002885	4003754	+	289	COG2829M	P	outer membrane phospholipase A	4	4	783234	636602	784950	637792	90.405	73.4563	81.9306
metR	16131677	1383451	b3828	4009886	4010839	-	317	COG0583K	P	DNA-binding transcriptional activator, homocysteine-binding	3	3	506110	382299	944078	750834	108.732	86.4757	97.6039
metE	16131678	1383452	b3829	4011076	4013337	+	753	COG0620E	P	5-methyltetrahydropteroyltriglutamate-homocysteine S-methyltransferase	40	39	355588320	290021344	267915328	238179328	30856.6	27431.8	29144.2
udp	16131680	1383453	b3831	4014454	4015215	+	253	COG2820F	P	uridine phosphorylase	9	8	9515027	9196566	9025464	7950829	1039.49	915.719	977.604
rmuC	16131681	1383454	b3832	4015356	4016783	+	475	COG1322S	P	predicted recombination limiting protein	3	3	293224	283233	252598	217023	29.0924	24.9952	27.0438
ubiJ	16131683	3742	b3834	4017647	4018252	+	201	COG3165S	P	conserved protein, SCP2 family	2	2	764069	851557	768832	852324	88.5485	98.1646	93.3565
ubiB	16131684	3742	b3835	4018249	4019889	+	546	COG0661R	P	2-octaprenylphenol hydroxylase	6	5	728150	692900	909608	1.1072e+06	104.762	127.519	116.14
tatC	16131687	3743	b3839	4020759	4021535	+	258	COG0805U	C	TatABCE protein translocation system subunit	1	1	116363	104222
rfaH	16131688	1383455	b3842	4022356	4022844	-	162	COG0250K	P	DNA-binding transcriptional antiterminator	1	1	552114	726350
ubiD	16131689	3744	b3843	4023011	4024504	+	497	COG0043H	P	3-octaprenyl-4-hydroxybenzoate decarboxylase	10	10	1.52336e+06	1.08355e+06	1.55378e+06	1.10578e+06	178.953	127.356	153.154
fre	16131690	3744	b3844	4024550	4025251	+	233	COG0543HC	P	NAD(P)H-flavin reductase	4	4	2136267	2.41513e+06	2.11288e+06	2.385e+06	243.347	274.687	259.017
fadB	16131692	3745	b3846	4026805	4028994	-	729	COG1250I	C	fused 3-hydroxybutyryl-CoA epimerase/delta(3)-cis-delta(2)-trans-enoyl-CoA isomerase/enoyl-CoA hydratase/3-hydroxyacyl-CoA dehydrogenase	8	8	855474	1.15901e+06	1.02182e+06	1.13172e+06	117.686	130.343	124.015
pepQ	16131693	3746	b3847	4029184	4030515	+	443	COG0006E	P	proline dipeptidase	16	16	8140448	8802960	8.32324e+06	8973714	958.61	1033.53	996.069
hemG	16131696	3746	b3850	4032631	4033176	+	181	COG4635CH	P	protoporphyrin oxidase, flavoprotein	8	8	1.94091e+06	1.98033e+06	1.90024e+06	1.95255e+06	218.856	224.881	221.868
mobA	16131698	3747	b3857	4039438	4040022	-	194	COG0746H	P	molybdopterin-guanine dinucleotide synthase	4	4	207686	207378	216011	216774	24.8786	24.9664	24.9225
yihD	16131699	3748	b3858	4040092	4040361	+	89	COG3084S	P	DUF1040 protein YihD	4	4	1.78848e+06	1.58056e+06	1.78657e+06	1576576	205.764	181.579	193.672
srkA	16131700	3748	b3859	4040438	4041424	+	328	COG2334R	P	Thr/Ser kinase implicated in Cpx stress response	3	3	282586	226881	494732	338630	56.9797	39.001	47.9903
dsba	16131701	3748	b3860	4041441	4042067	+	208	COG1651O	P	periplasmic protein disulfide isomerase I	8	8	8090833	7378638	7172347	6414558	826.059	738.783	782.421
polA	16131704	1383457	b3863	4044989	4047775	+	928	COG0749L	P	fused DNA polymerase I 5'->3' polymerase/3'->5' exonuclease/5'->3' exonuclease	24	24	4163168	3.85434e+06	2.98857e+06	2913237	344.202	335.526	339.864
yihI	16131706	1383458	b3866	4049370	4049879	+	169	COG3078S	P	activator of Der GTPase	8	8	6789458	5.3039e+06	6386587	4892422	735.561	563.474	649.518
glnG	16131708	3749	b3868	4051892	4053301	-	469	COG2204T	P	fused DNA-binding response regulator in two-component regulatory system with GlnL: response regulator/sigma54 interaction protein	4	4	776477	865773	2.56701e+06	3.79556e+06	295.65	437.146	366.398
glnL	16131709	3749	b3869	4053313	4054362	-	349	COG3852T	P	sensory histidine kinase in two-component regulatory system with GlnG	1	1	87644.4	121933
glnA	16131710	1383459	b3870	4054648	4056057	-	469	COG0174E	P	glutamine synthetase	20	21	58323980	62981784	48526660	53464476	5588.95	6157.65	5873.3
dtd	16131727	3753	b3887	4075038	4075475	+	145	COG1490J	P	D-tyr-tRNA(Tyr) deacylase	1	1	2.45411e+06	2.67348e+06
yiiD	16131728	3753	b3888	4075472	4076461	+	329	COG1246E	P	predicted acetyltransferase	7	7	1.82833e+06	1.61733e+06	1.99303e+06	1.7649e+06	229.543	203.268	216.405
fdhE	16131731	3754	b3891	4078322	4079251	-	309	COG3058O	C	formate dehydrogenase formation protein	7	7	1.74997e+06	1.66661e+06	1.0244e+06	980652	117.983	112.944	115.464
fdoG	16131734	3754	b3894	4080795	4083845	-	1016	COG0243C	C	formate dehydrogenase-O, large subunit	7	7	548884	506878	381933	366308	43.9883	42.1887	43.0885
cpxA	16131751	3759	b3911	4101625	4102998	-	457	COG0642T	P	sensory histidine kinase in two-component regulatory system with CpxR	4	4	488919	318210	2.21818e+06	2.3451e+06	255.473	270.092	262.783
cpxR	16131752	3759	b3912	4102995	4103693	-	232	COG0745TK	P	DNA-binding response regulator in two-component regulatory system with CpxA	6	6	1.80587e+06	2079133	2.41521e+06	2512797	278.167	289.406	283.786
pfkA	16131754	1383465	b3916	4105575	4106537	+	320	COG0205G	P	6-phosphofructokinase I	12	12	24218948	27298980	19759980	22133310	2275.81	2549.16	2412.48
sbp	16131755	1383466	b3917	4106857	4107846	+	329	COG1613P	P	sulfate transporter subunit	1	1	269103	263211
cdh	16131756	1383467	b3918	4107953	4108708	+	251	COG2134I	P	CDP-diacylglycerol phosphotidylhydrolase	1	1		485064
tpiA	16131757	1383468	b3919	4108763	4109530	-	255	COG0149G	P	triosephosphate isomerase	12	12	20533062	23507442	21369722	21995368	2461.21	2533.27	2497.24
yiiQ	16131758	1383469	b3920	4109638	4110237	-	199	-	P	conserved protein	2	2	602130	546867	566878	592365	65.2889	68.2243	66.7566
uspD	16131761	3760	b3923	4111316	4111744	+	142	COG0589T	P	stress-induced protein	2	2	623313	560491	1.07773e+06	541200	124.125	62.3315	93.2283
fpr	16131762	1383471	b3924	4111749	4112495	-	248	COG1018C	P	ferredoxin-NADP reductase	7	7	1.9856e+06	1.75693e+06	1987905	1.7629e+06	228.953	203.038	215.995
glpX	16131763	1383472	b3925	4112592	4113602	-	336	COG1494G	P	fructose 1,6-bisphosphatase II	3	3	807558	815982	1.12009e+06	886079	129.004	102.052	115.528
glpK	16131764	3761	b3926	4113737	4115245	-	502	COG0554C	P	glycerol kinase	12	12	916959	1.03269e+06	835168	1.58402e+06	96.1887	182.436	139.312
zapB	16131766	1383473	b3928	4116538	4116783	+	81	COG3074S	P	septal ring assembly factor, stimulates cell division	4	4	2.84453e+06	4.38906e+06	3.74916e+06	5342410	431.802	615.3	523.551
rraA	16131767	1383474	b3929	4116868	4117353	-	161	COG0684H	P	ribonuclease E (RNase E) inhibitor protein	2	2	7319080	3.79829e+06	7764745	5104675	894.288	587.92	741.104
hslU	16131769	3762	b3931	4118439	4119770	-	443	COG1220O	P	molecular chaperone and ATPase component of HslUV protease	21	21	13350083	11835975	8845024	7706470	1018.71	887.576	953.141
hslV	16131770	3762	b3932	4119780	4120310	-	176	COG5405O	P	peptidase component of the HslUV protease	2	2	3882518	2.97156e+06	3.84828e+06	2.99997e+06	443.217	345.515	394.366
ftsN	16131771	3762	b3933	4120403	4121362	-	319	COG3087D	P	essential cell division protein	13	13	1.26342e+06	999259	1.13957e+06	945711	131.247	108.92	120.084
rpmE	16131774	1383477	b3936	4125036	4125248	+	70	COG0254J	P	50S ribosomal subunit protein L31	4	4	2.25039e+06	3.38973e+06	2.6687e+06	3767122	307.362	433.87	370.616
metJ	16131776	1383479	b3938	4126101	4126418	-	105	COG3060KE	P	DNA-binding transcriptional repressor, S-adenosylmethionine-binding	4	4	22946718	22678224	23293682	22408542	2682.8	2580.85	2631.83
metB	16131777	3763	b3939	4126695	4127855	+	386	COG0626E	P	cystathionine gamma-synthase, PLP-dependent	8	8	10717050	8348660	8582300	7643649	988.448	880.341	934.394
metL	16131778	3763	b3940	4127858	4130290	+	810	COG0527E	P	fused aspartokinase II/homoserine dehydrogenase II	23	23	5.66256e+06	5037114	7.70445e+06	4.87407e+06	887.343	561.36	724.351
metF	16131779	1383480	b3941	4130639	4131529	+	296	COG0685E	P	5,10-methylenetetrahydrofolate reductase	14	14	21340676	25669122	18638592	22220576	2146.66	2559.21	2352.93
katG	16131780	3764	b3942	4131858	4134038	+	726	COG0376P	P	catalase-peroxidase HPI, heme b-containing	28	28	7937448	7478146	7.75711e+06	7361291	893.408	847.821	870.614
eptC	16131793	1383483	b3955	4146555	4148288	-	577	COG2194R	P	conserved inner membrane protein	15	15	5.2616e+06	5331230	4.88897e+06	5.39957e+06	563.077	621.883	592.48
ppc	16131794	1383484	b3956	4148470	4151121	-	883	COG2352C	P	phosphoenolpyruvate carboxylase	51	51	57586544	53290916	27207484	26032094	3133.56	2998.19	3065.88
argE	16131795	1383485	b3957	4151719	4152870	-	383	COG0624E	P	acetylornithine deacetylase	9	9	12499522	11310630	7131189	6690772	821.319	770.595	795.957
argC	16131796	3767	b3958	4153024	4154028	+	334	COG0002E	P	N-acetyl-gamma-glutamylphosphate reductase, NAD(P)-binding	7	7	5.37549e+06	5.65116e+06	4526223	4712057	521.298	542.701	531.999
argH	16131798	3767	b3960	4154873	4156246	+	457	COG0165E	P	argininosuccinate lyase	20	20	9567874	10630855	12640328	13296924	1455.82	1531.44	1493.63
oxyR	16131799	1383486	b3961	4156513	4157430	+	305	COG0583K	P	DNA-binding transcriptional dual regulator	8	8	2.56943e+06	2.48761e+06	2.36874e+06	2.29709e+06	272.815	264.562	268.688
trmA	16131803	1383487	b3965	4160193	4161293	-	366	COG2265J	P	tRNA m(5)U54 methyltransferase, SAM-dependen	6	6	628437	632170	764134	613305	88.0075	70.6361	79.3218
btuB	16131804	3769	b3966	4161662	4163506	+	614	COG4206H	P	vitamin B12/cobalamin outer membrane transporter	16	16	3.38847e+06	3.95796e+06	2.90627e+06	3.36987e+06	334.723	388.118	361.42
murB	16131806	3770	b3972	4170080	4171108	+	342	COG0812M	P	UDP-N-acetylenolpyruvoylglucosamine reductase, FAD-binding	5	5	1.09956e+06	1163306	1.10855e+06	1.13815e+06	127.674	131.084	129.379
birA	16131807	3770	b3973	4171105	4172070	+	321	COG0340H	P	bifunctional biotin-[acetylCoA carboxylase] holoenzyme synthetase/ DNA-binding transcriptional repressor, bio-5'-AMP-binding	5	5	292069	250500	237988	233466	27.4097	26.889	27.1493
coaA	16131808	1383488	b3974	4172099	4173049	-	316	COG1072H	P	pantothenate kinase	6	6	2.25485e+06	2.13455e+06	1601998	1.50291e+06	184.507	173.094	178.8
nusG	16131812	3771	b3982	4175766	4176311	+	181	COG0250K	P	transcription termination factor	11	11	15710965	21908292	15169182	20894188	1747.08	2406.44	2076.76
rplK	16131813	3772	b3983	4176470	4176898	+	142	COG0080J	C	50S ribosomal subunit protein L11	5	5	111557088	110889640	107984976	104254896	12436.9	12007.3	12222.1
rplA	16131814	3772	b3984	4176902	4177606	+	234	COG0081J	C	50S ribosomal subunit protein L1	15	15	140408672	128237120	91192672	84136144	10502.9	9690.2	10096.6
rplJ	16131815	1383490	b3985	4178019	4178516	+	165	COG0244J	C	50S ribosomal subunit protein L10	8	8	160838672	138164240	152220320	128623208	17531.6	14813.9	16172.8
rplL	16131816	1383491	b3986	4178583	4178948	+	121	COG0222J	C	50S ribosomal subunit protein L7/L12	10	10	267306144	171620000	194117952	178267408	22357.1	20531.6	21444.3
rpoB	16131817	3773	b3987	4179268	4183296	+	1342	COG0085K	C	RNA polymerase, beta subunit	69	69	48277504	47019096	47102660	46284844	5424.95	5330.76	5377.85
rpoC	16131818	3773	b3988	4183373	4187596	+	1407	COG0086K	C	RNA polymerase, beta prime subunit	60	60	35923868	33917372	27578150	26260036	3176.25	3024.44	3100.35
thiH	16131820	3774	b3990	4188758	4189891	-	377	COG1060HR	P	tyrosine lyase, involved in thiamin-thiazole moiety synthesis	12	10	2.89425e+06	2.91829e+06	2.44826e+06	2.44923e+06	281.972	282.085	282.029
thiE	16131823	3774	b3993	4191592	4192227	-	211	COG0352H	P	thiamin phosphate synthase (thiamin phosphate pyrophosphorylase)	10	10	5.37172e+06	6.82546e+06	5.34298e+06	6732188	615.366	775.365	695.365
thiC	16131824	3774	b3994	4192227	4194122	-	631	COG0422H	P	thiamin (pyrimidine moiety) biosynthesis protein	23	23	13276786	12493782	12873477	12064462	1482.67	1389.5	1436.09
rsd	16131825	1383493	b3995	4194355	4194831	-	158	COG3160K	P	stationary phase protein, binds sigma 70 RNA polymerase subunit	3	3	2709966	2909372	2.59656e+06	2.67455e+06	299.053	308.035	303.544
HEME	16131827	3775	b3997	4195739	4196803	+	354	COG0407H	P	uroporphyrinogen decarboxylase	5	5	1.65271e+06	1.45416e+06	1.57352e+06	2.07371e+06	181.227	238.835	210.031
yjaG	16131829	3775	b3999	4197527	4198117	+	196	COG3068S	P	conserved protein	5	5	1.01941e+06	875144	1.29407e+06	1.03687e+06	149.042	119.419	134.231
hupA	16131830	3776	b4000	4198304	4198576	+	90	COG0776L	P	HU, DNA-binding transcriptional regulator, alpha subunit	4	4	119384344	114370480	118721200	113293528	13673.5	13048.3	13360.9
purD	16131835	3778	b4005	4202665	4203954	-	429	COG0151F	P	phosphoribosylglycinamide synthetase phosphoribosylamine-glycine ligase	15	15	9503476	9057438	5850515	5628476	673.82	648.247	661.034
purH	16131836	3778	b4006	4203966	4205555	-	529	COG0138F	P	fused IMP cyclohydrolase/phosphoribosylaminoimidazolecarboxamide formyltransferase	31	31	21645472	23695082	25443576	26427534	2930.41	3043.73	2987.07
metA	16131839	1383496	b4013	4212303	4213232	+	309	COG1897E	P	homoserine O-transsuccinylase	10	10	8749086	6.77842e+06	8343631	5677988	960.959	653.95	807.455
aceB	16131840	3779	b4014	4213501	4215102	+	533	COG2225C	P	malate synthase A	21	21	72696504	55980120	30731278	25478074	3539.41	2934.38	3236.89
aceA	16131841	3779	b4015	4215132	4216436	+	434	COG2224C	P	isocitrate lyase	22	21	103852664	104670384	97254912	95309960	11201.1	10977.1	11089.1
aceK	16131842	1383497	b4016	4216619	4218355	+	578	COG4579T	P	isocitrate dehydrogenase kinase/phosphatase	1	2	182702	234992	450467	486915	51.8815	56.0794	53.9805
metH	16131845	1383499	b4019	4221851	4225534	+	1227	COG1410E	P	homocysteine-N5-methyltetrahydrofolate transmethylase, B12-dependent	39	39	6792474	4639704	6920450	4853213	797.048	558.958	678.003
yjbB	16131846	1383500	b4020	4225754	4227385	+	543	COG1283P	P	predicted Na+/Pi-cotransporter	3	3	503444	155346	820757	409900	94.5289	47.2093	70.8691
rluF	16131848	1383502	b4022	4228377	4229249	+	290	COG1187J	P	23S rRNA U2604 pseudouridine synthase	3	3	831879	785716	1275878	1.71621e+06	146.946	197.66	172.303
yjbD	16131849	1383503	b4023	4229382	4229654	-	90	-	P	conserved protein	1	1	689223	695670
lysc	16131850	1383504	b4024	4229907	4231256	-	449	COG0527E	P	aspartokinase III	19	19	25674436	24779210	25608674	24946254	2949.42	2873.13	2911.28
Pgi	16131851	1383505	b4025	4231781	4233430	+	549	COG0166G	P	glucosephosphate isomerase	24	24	17462972	11470973	10460750	7.37107e+06	1204.79	848.947	1026.87
malF	16131859	3781	b4033	4241554	4243098	-	514	COG1175G	C	maltose transporter subunit	1	1	199802	274864
malE	16131860	1383508	b4034	4243252	4244442	-	396	COG2182G	P	maltose transporter subunit	7	7	2756133	1.52945e+06	2.59869e+06	1.37941e+06	299.298	158.871	229.085
malK	16131861	3782	b4035	4244807	4245922	+	371	COG3839G	P	fused maltose transport subunit, ATP-binding component of ABC superfamily/regulatory protein	3	3	399560	269669	159069	121138	18.3204	13.9518	16.1361
lamB	16131862	3782	b4036	4245994	4247334	+	446	COG4580G	P	maltose outer membrane porin (maltoporin)	3	3	269892	349253	869689	806354	100.165	92.8701	96.5173
malM	16131863	1383509	b4037	4247577	4248497	+	306	-	P	maltose regulon periplasmic protein	2	2	1.37478e+06	1.60819e+06	1.34546e+06	1.62171e+06	154.961	186.777	170.869
DGKA	16131868	1383510	b4042	4254660	4255028	+	122	COG0818M	P	diacylglycerol kinase	2	2	1.46309e+06	924099	978762	644189	112.727	74.1931	93.46
lexA	16131869	3784	b4043	4255138	4255746	+	202	COG1974KT	P	DNA-binding transcriptional repressor of SOS regulon	7	7	1.62319e+06	1.65275e+06	1.65948e+06	1.67453e+06	191.127	192.86	191.993
qorA	16131877	1383512	b4051	4261271	4262254	-	327	COG0604CR	P	quinone oxidoreductase, NADPH-dependent	6	6	1.66699e+06	1911274	1.00992e+06	1.23561e+06	116.315	142.309	129.312
dnaB	16131878	3786	b4052	4262337	4263752	+	471	COG0305L	P	replicative DNA helicase	7	7	1.26179e+06	1194509	1.19941e+06	1.33274e+06	138.139	153.495	145.817
alr	16131879	3786	b4053	4263805	4264884	+	359	COG0787M	P	alanine racemase 1, PLP-binding, biosynthetic	4	4	534957	554080	1.29328e+06	971131	148.951	111.848	130.399
tyrB	16131880	1383513	b4054	4265137	4266330	+	397	COG1448E	P	tyrosine aminotransferase, tyrosine-repressible, PLP-dependent	15	15	14395113	14044812	14907982	14676477	1716.99	1690.33	1703.66
aphA	16131881	1383514	b4055	4267437	4268150	+	237	COG3700R	P	acid phosphatase/phosphotransferase, class B, non-specific	1	1		481628
yjbQ	16131882	3787	b4056	4268261	4268677	+	138	COG0432S	P	thiamin phosphate synthase	1	1	176466	86366.1
yjbR	16131883	3787	b4057	4268681	4269037	+	118	COG2315S	P	conserved protein	2	2	774421	1.03483e+06	1604676	2.18583e+06	184.815	251.748	218.282
uvrA	16131884	1383515	b4058	4269072	4271894	-	940	COG0178L	C	ATPase and DNA damage recognition protein of nucleotide excision repair excinuclease UvrABC	10	9	1500355	1.42759e+06	1.41956e+06	1.35571e+06	163.494	156.141	159.818
SSB	16131885	1383516	b4059	4272148	4272684	+	178	COG0629L	P	single-stranded DNA-binding protein	6	6	7584878	9586362	5816778	7362002	669.935	847.902	758.919
soxR	16131889	1383519	b4063	4275492	4275956	+	154	COG0789K	P	DNA-binding transcriptional dual regulator, Fe-S center for redox-sensing	1	1	26492.7	58362.5
ghxP	16131890	1383520	b4064	4276502	4277851	+	449	COG2252R	P	predicted permease	4	4	3327590	3.61998e+06	3.82618e+06	3.40791e+06	440.672	392.499	416.585
yjcE	16131891	1383521	b4065	4278003	4279652	+	549	COG0025P	P	predicted cation/proton antiporter	1	1	921811	791022
actP	16131893	3788	b4067	4281276	4282925	-	549	COG4147R	P	acetate transporter	1	1	526642	436890
yjcH	16131894	3788	b4068	4282922	4283236	-	104	COG3162S	P	inner membrane protein, DUF485 family	1	1	73577	76269.8
ACS	16131895	1383523	b4069	4283436	4285394	-	652	COG0365I	P	acetyl-CoA synthetase	20	20	3.47274e+06	3324282	3639365	3.56879e+06	419.156	411.028	415.092
GLTP	16131903	1383524	b4077	4292504	4293817	+	437	COG1301C	P	glutamate/aspartate:proton symporter	1	1	291804	204952
yjcO	16131904	1383525	b4078	4294459	4295148	-	229	COG0790R	P	conserved protein	1	1	275031	310444
rpiB	16131916	1383527	b4090	4311373	4311822	+	149	COG0698G	P	ribose 5-phosphate isomerase B/allose 6-phosphate isomerase	1	1	264014	212528
phnO	16131919	3793	b4093	4313127	4313561	-	144	COG1246E	C	predicted acyltransferase with acyl-CoA N-acyltransferase domain	1	1	23544.4	54356.2
yjdN	16131933	1383528	b4107	4323321	4323764	-	147	COG2764S	P	conserved protein	1	1	221285	208484
yjdM	16131934	1383529	b4108	4324422	4324757	-	111	COG2824P	P	conserved protein	1	1	117637	120118
crfC	16131935	3795	b4109	4325158	4327386	+	742	COG1160R	P	mutational suppressor of yhjH motility mutation, function unknown; related to Dynamin GTPase	2	2	281701	300558	315608	460234	36.3494	53.0064	44.6779
proP	16131937	1383530	b4111	4328525	4330027	+	500	COG2814G	P	proline/glycine betaine transporter	6	6	4.26473e+06	5014604	3867435	4517131	445.423	520.251	482.837
basR	16131939	3796	b4113	4331305	4331973	-	222	COG0745TK	P	DNA-binding response regulator in two-component regulatory system with BasS	2	2	205472	2.10881e+06	368511	286866	42.4424	33.0392	37.7408
fumB	16131948	3797	b4122	4343703	4345349	-	548	COG1951C	P	anaerobic class I fumarate hydratase (fumarase B)	1	1		154541
lysU	16131955	1383536	b4129	4351223	4352740	-	505	COG1190J	P	lysine tRNA synthetase, inducible	7	7	1.67056e+06	1.18301e+06	1.53631e+06	1.24504e+06	176.941	143.395	160.168
dsbD	16131961	3802	b4136	4361368	4363065	-	565	COG4232OC	P	fused thiol:disulfide interchange protein: activator of DsbC/conserved protein	5	5	1.09735e+06	1.09213e+06	1136403	481211	130.883	55.4224	93.1526
CUTA	16131962	3802	b4137	4363041	4363379	-	112	COG1324P	P	divalent-cation tolerance protein, copper sensitivity	1	1	97157.3	48530.7
dcuA	16131963	1383538	b4138	4363495	4364796	-	433	COG2704R	P	C4-dicarboxylate antiporter	1	1	744008	721796
groS	16131967	3803	b4142	4368711	4369004	+	97	COG0234O	C	Cpn10 chaperonin GroES, small subunit of GroESL	5	5	41697796	35932228	42890956	36550584	4939.87	4209.63	4574.75
groL	16131968	3803	b4143	4369048	4370694	+	548	COG0459O	C	Cpn60 chaperonin GroEL, large subunit of GroESL	28	28	137986432	104194704	125384400	94248872	14440.9	10854.9	12647.9
efP	16131972	1383542	b4147	4373722	4374288	+	188	COG0231J	P	elongation factor EF-P	3	3	16334502	19801158	18052460	18196444	2079.15	2095.74	2087.44
blc	16131974	3804	b4149	4375212	4375745	-	177	COG3040M	C	outer membrane lipoprotein (lipocalin), cell division and growth function	1	1	1.57698e+06	1495126
ampC	16131975	3804	b4150	4375834	4376967	-	377	COG1680V	C	beta-lactamase/D-alanine carboxypeptidase	3	3	543608	456029	350342	310371	40.3499	35.7462	38.0481
frdA	16131979	3804	b4154	4378533	4380341	-	602	COG1053C	C	fumarate reductase (anaerobic) catalytic and NAD/flavoprotein subunit	3	3	572383	343521	396432	278414	45.6582	32.0657	38.8619
mscM	16131984	3806	b4159	4384070	4387393	-	1107	COG3264M	P	predicted mechanosensitive channel	8	8	671643	546277	418175	393644	48.1624	45.3371	46.7498
PSD	16131985	3806	b4160	4387415	4388383	-	322	COG0688I	P	phosphatidylserine decarboxylase	8	8	3419962	3040907	3.11206e+06	2.52746e+06	358.425	291.094	324.76
tsaE	16131990	3807	b4168	4393608	4394069	+	153	COG0802R	P	ADP-binding protein essential for nucleoid integrity	2	2	751980	541189	1.60377e+06	1.45493e+06	184.711	167.568	176.139
mutL	16131992	3807	b4170	4395435	4397282	+	615	COG0323L	P	methyl-directed mismatch repair protein	2	2	357454	329837	366894	331477	42.2563	38.1772	40.2167
miaA	16131993	3807	b4171	4397275	4398225	+	316	COG0324J	P	delta(2)-isopentenylpyrophosphate tRNA-adenosine transferase	5	5	180975	235501	149199	240029	17.1837	27.6448	22.4143
hfq	16131994	1383544	b4172	4398311	4398619	+	102	COG1923R	P	HF-I, host factor for RNA phage Q beta replication	1	1	4687167	4.74028e+06
hflX	16131995	3808	b4173	4398695	4399975	+	426	COG2262R	P	GTPase, stimulated by 50S subunit binding	12	12	2973343	2.73741e+06	2.72471e+06	2520393	313.812	290.281	302.046
hflK	16131996	3808	b4174	4400061	4401320	+	419	COG0330O	P	modulator for HflB protease specific for phage lambda cII repressor	13	13	16103681	14590775	9968205	9931387	1148.07	1143.83	1145.95
hflC	16131997	3808	b4175	4401323	4402327	+	334	COG0330O	P	modulator for HflB protease specific for phage lambda cII repressor	13	13	14161841	13137181	6787408	6391488	781.725	736.126	758.925
PURA	16131999	1383546	b4177	4402710	4404008	+	432	COG0104F	P	adenylosuccinate synthetase	24	24	66760904	61980100	47976756	42593960	5525.62	4905.67	5215.64
nsrR	16132000	3809	b4178	4404213	4404638	+	141	COG1959K	P	nitric oxide-sensitive repressor for NO regulon	1	1	841066	1.18207e+06
rlmB	16132002	1383547	b4180	4407298	4408029	+	243	COG0566J	P	23S rRNA (Gm2251)-methyltransferase	1	1	402004	391761
yjfP	16132012	1383548	b4190	4414975	4415724	+	249	COG1073R	P	acyl CoA esterase actviity in vitro	1	1	732421	548306
ulaR	16132013	1383549	b4191	4415721	4416476	-	251	COG1349KG	P	transcriptional tepressor for the L-ascorbate utilization (ula) divergon	4	4	351072	345097	241065	232799	27.7642	26.8122	27.2882
rpsR	16132024	3812	b4202	4423862	4424089	+	75	COG0238J	C	30S ribosomal subunit protein S18	3	3	88010488	76010552	87629736	76572928	10092.6	8819.12	9455.84
rplI	16132025	3812	b4203	4424131	4424580	+	149	COG0359J	C	50S ribosomal subunit protein L9	10	10	121988136	125452664	86782280	93340736	9994.96	10750.3	10372.6
cycA	16132030	1383552	b4208	4427887	4429299	+	470	COG1113E	P	D-alanine/D-serine/glycine transporter	1	1	8033140	7039011
qorB	16132033	1383554	b4211	4431187	4432047	-	286	COG0702MG	P	NAD(P)H:quinone oxidoreductase	8	8	1.71707e+06	1.8107e+06	772523	706792	88.9736	81.4032	85.1884
cpdB	16132035	1383555	b4213	4432645	4434588	-	647	COG0737F	P	2':3'-cyclic-nucleotide 2'-phosphodiesterase	10	10	576216	561593	1135596	892694	130.79	102.814	116.802
cysQ	16132036	1383556	b4214	4434778	4435518	+	246	COG1218P	P	PAPS (adenosine 3'-phosphate 5'-phosphosulfate) 3'(2'),5'-bisphosphate nucleotidase	8	8	2.27291e+06	2.14645e+06	1.56324e+06	1.24325e+06	180.043	143.189	161.616
ytfJ	16132038	1383557	b4216	4436731	4437285	-	184	COG3054R	P	predicted transcriptional regulator	1	1	178661	219230
ytfL	16132040	1383558	b4218	4437895	4439238	-	447	COG1253R	P	inner membrane protein, UPF0053 family	4	4	435132	537223	530190	615762	61.0635	70.919	65.9912
MSRA	16132041	1383559	b4219	4439561	4440199	-	212	COG0225O	P	methionine sulfoxide reductase A	5	5	3.92443e+06	3.83089e+06	3.4034e+06	3405458	391.979	392.216	392.097
tamA	16132042	3813	b4220	4440405	4442138	+	577	COG0729M	P	predicted outer membrane protein and surface antigen	5	5	676361	652378	1.80237e+06	1.54586e+06	207.584	178.041	192.813
tamB	16132043	3813	b4221	4442135	4445914	+	1259	COG2911S	P	large conserved protein, DUF490 family	12	12	1.1208e+06	921006	1.61124e+06	1486651	185.571	171.222	178.396
ppa	16132048	1383560	b4226	4447145	4447675	-	176	COG0221C	P	inorganic pyrophosphatase	10	10	73623824	59956060	67934168	67476544	7824.17	7771.46	7797.82
ytfQ	16132049	1383561	b4227	4447985	4448941	+	318	COG1879G	P	galactofuranose binding proteint: periplasmic-binding component of ABC superfamily	1	1	321808	197827
fbp	16132054	1383562	b4232	4452634	4453632	-	332	COG0158G	P	fructose-1,6-bisphosphatase I	13	13	6.56948e+06	6.74697e+06	2.80732e+06	2.845e+06	323.326	327.666	325.496
MPL	16132055	1383563	b4233	4453808	4455181	+	457	COG0773M	P	UDP-N-acetylmuramate:L-alanyl-gamma-D-glutamyl-meso-diaminopimelate ligase	9	9	1.82989e+06	2.28226e+06	7210141	4.65968e+06	830.412	536.668	683.54
yjgA	16132056	1383564	b4234	4455337	4455888	-	183	COG3028S	P	conserved protein, ribosome-associated	6	6	4.73509e+06	4180639	3.54079e+06	3.10047e+06	407.802	357.09	382.446
pmbA	16132057	1383565	b4235	4455982	4457334	+	450	COG0312R	P	predicted peptidase required for the maturation and secretion of the antibiotic peptide MccB17	17	17	5689307	5.26531e+06	4880819	4.2822e+06	562.138	493.193	527.666
nrdD	16132060	1383567	b4238	4458545	4460683	-	712	COG1328F	P	anaerobic ribonucleoside-triphosphate reductase	6	6	469154	696050	1020643	740486	117.55	85.2839	101.417
treC	16132061	3816	b4239	4461077	4462732	-	551	COG0366G	P	trehalose-6-P hydrolase	1	1	125346	92345.4
treR	16132063	1383568	b4241	4464322	4465269	-	315	COG1609K	P	DNA-binding transcriptional repressor	3	3	324854	311032	423105	227739	48.7302	26.2294	37.4798
mgtA	16132064	3817	b4242	4465648	4468344	+	898	COG0474P	P	magnesium transporter	4	3	291239	386022	784009	688952	90.2965	79.3485	84.8225
pyrI	16132066	3818	b4244	4469009	4469470	-	153	COG1781F	C	aspartate carbamoyltransferase, regulatory subunit	7	7	39893312	47757180	40082076	47368560	4616.37	5455.57	5035.97
pyrB	16132067	3818	b4245	4469483	4470418	-	311	COG0540F	C	aspartate carbamoyltransferase, catalytic subunit	13	13	87634256	101119600	86835792	99976224	10001.1	11514.5	10757.8
argI	16132076	1383572	b4254	4475330	4476334	-	334	COG0078E	P	ornithine carbamoyltransferase 1	6	6	5523824	5697781	5.53228e+06	5681724	637.169	654.38	645.774
valS	16132080	3819	b4258	4479005	4481860	-	951	COG0525J	P	valyl-tRNA synthetase	38	38	17780664	17302490	17929350	17736540	2064.97	2042.77	2053.87
holC	16132081	3819	b4259	4481860	4482303	-	147	COG2927L	P	DNA polymerase III, chi subunit	1	1	310359	268541
pepA	16132082	1383574	b4260	4482463	4483974	-	503	COG0260E	P	multifunctional aminopeptidase A: a cyteinylglycinase, transcription regulator and site-specific recombination factor	16	16	12877167	11323086	7.94678e+06	7069334	915.253	814.195	864.724
lptF	16132083	3820	b4261	4484241	4485341	+	366	COG0795R	C	lipopolysaccharide export ABC permease of the LptBFGC export complex	3	3	1228597	1.11177e+06	1289800	1.12506e+06	148.55	129.576	139.063
yjgR	16132085	3821	b4263	4486584	4488086	-	500	COG0433R	P	conserved protein, DUF853 family with NTPase fold	7	7	1.59736e+06	1.00767e+06	1228207	1.07839e+06	141.456	124.201	132.829
fecA	16132112	3824	b4291	4512376	4514700	-	774	COG4772P	C	KpLE2 phage-like element; ferric citrate outer membrane transporter	3	3	251294	255954	252249	254045	29.0522	29.2591	29.1557
fecR	16132113	3825	b4292	4514787	4515740	-	317	COG3712PT	P	KpLE2 phage-like element; transmembrane signal transducer for ferric citrate transport	1	1	2.30283e+06	2463185
fimA	16132135	3831	b4314	4541138	4541686	+	182	COG3539NU	P	major type 1 subunit fimbrin (pilin)	1	1	3.73269e+06	3.45022e+06
fimH	16132141	3832	b4320	4546831	4547733	+	300	-	P	minor component of type 1 fimbriae	1	1	413780	440515
uxuA	16132143	3833	b4322	4549659	4550843	+	394	COG1312G	P	mannonate hydrolase	5	5	1.32654e+06	1.25564e+06	1.56092e+06	4724652	179.775	544.151	361.963
uxuB	16132144	3833	b4323	4550924	4552384	+	486	COG0246G	P	D-mannonate oxidoreductase, NAD-dependent	3	3	728898	788611	1.22144e+06	1.0975e+06	140.677	126.402	133.54
uxuR	16132145	1383585	b4324	4552599	4553372	+	257	COG2186K	P	DNA-binding transcriptional repressor	1	1	137283	175568
iadA	16132149	3834	b4328	4556377	4557549	-	390	COG0044F	P	isoaspartyl dipeptidase	7	7	583404	884239	1.45312e+06	1.14218e+06	167.36	131.548	149.454
yjiN	16132157	3836	b4336	4563989	4565269	-	426	COG2733S	P	zinc-type alcohol dehydrogenase-like protein	2	2	197043	160010	968118	712143	111.501	82.0195	96.7602
hsdS	16132169	3838	b4348	4578091	4579485	-	464	COG0732V	P	specificity determinant for hsdM and hsdR	1	1	700350	534914
hsdM	16132170	3838	b4349	4579482	4581071	-	529	COG0286V	P	DNA methyltransferase M	13	13	1.72499e+06	1.87597e+06	5917062	4.73709e+06	681.485	545.584	613.534
mrr	16132172	1383589	b4351	4584972	4585886	+	304	COG1715V	P	methylated adenine and cytosine restriction protein	7	7	1.10634e+06	1.16569e+06	1.02876e+06	1.06795e+06	118.485	122.999	120.742
tsr	16132176	1383590	b4355	4589680	4591335	+	551	COG0840NT	C	methyl-accepting chemotaxis protein I, serine sensor receptor	21	21	48879284	45106088	41786280	38854948	4812.64	4475.03	4643.84
fhuF	16132188	1383593	b4367	4602898	4603686	-	262	COG4114R	P	ferric iron reductase involved in ferric hydroximate transport	5	5	2918728	2.57674e+06	1.63842e+06	1.53335e+06	188.701	176.6	182.651
rsmC	16132189	1383594	b4371	4604692	4605723	-	343	COG2813J	P	16S rRNA m(2)G1207 methyltransferase	6	6	2.00022e+06	2.02869e+06	2.01229e+06	2.01562e+06	231.761	232.145	231.953
rimI	16132191	3842	b4373	4606208	4606654	+	148	COG0456R	P	ribosomal-protein-S18-alanine N-acetyltransferase	2	2	314839	405157	341485	338179	39.3298	38.9491	39.1394
yjjG	16132192	3842	b4374	4606669	4607346	+	225	COG1011R	P	dUMP phosphatase	2	2	748182	902671	784014	711352	90.2971	81.9284	86.1128
prfC	16132193	1383595	b4375	4607437	4609026	+	529	COG4108J	P	peptide chain release factor RF-3	17	16	4565027	4.33715e+06	7409974	7063830	853.428	813.561	833.494
osmY	16132194	3843	b4376	4609419	4610024	+	201	COG2823R	P	periplasmic protein	6	6	14618733	11766967	14730016	11672404	1696.5	1344.34	1520.42
yjjU	16132195	3843	b4377	4610434	4611507	+	357	COG4667R	P	predicted phospholipase, patatin-like family	4	4	301875	279890	510445	480236	58.7893	55.3101	57.0497
deoC	16132198	1383596	b4381	4615346	4616125	+	259	COG0274F	P	2-deoxyribose-5-phosphate aldolase, NAD(P)-linked	8	8	2.13151e+06	1.80217e+06	2308800	2.02467e+06	265.911	233.187	249.549
deoA	16132199	3845	b4382	4616252	4617574	+	440	COG0213F	P	thymidine phosphorylase	7	7	1.75373e+06	1.19219e+06	1301584	855655	149.907	98.5482	124.228
deoB	16132200	3845	b4383	4617626	4618849	+	407	COG1015G	P	phosphopentomutase	11	11	4302092	4224616	4823088	4925486	555.489	567.282	561.385
deoD	16132201	3845	b4384	4618906	4619625	+	239	COG0813F	P	purine-nucleoside phosphorylase	13	13	22663100	21277856	22396782	21010474	2579.5	2419.84	2499.67
lplA	16132203	3846	b4386	4621124	4622140	-	338	COG0095H	P	lipoate-protein ligase A	4	3	655322	662988	1.22295e+06	1.10133e+06	140.851	126.844	133.847
ytjB	16132204	3846	b4387	4622168	4622812	-	214	COG3726R	P	conserved membrane protein	2	2	629422	550631
serb	16132205	3847	b4388	4622918	4623886	+	322	COG0560E	P	3-phosphoserine phosphatase	10	10	1.85891e+06	2.14105e+06	2.07231e+06	2516286	238.673	289.808	264.241
radA	16132206	3847	b4389	4623935	4625317	+	460	COG1066O	P	DNA repair protein	1	1	52506.1	58083.8
ettA	16132208	1383598	b4391	4626878	4628545	-	555	COG0488R	P	fused predicted transporter subunits of ABC superfamily: ATP-binding components	29	28	13722557	12305239	12468857	12628642	1436.07	1454.48	1445.27
trpR	16132210	1383599	b4393	4630783	4631109	+	108	COG2973K	P	DNA-binding transcriptional repressor, tryptophan-binding	1	1	1.84195e+06	1.93388e+06
ytjC	16132212	1383600	b4395	4631820	4632467	+	215	COG0406G	P	phosphatase	5	5	972470	1100689	1747416	1.83951e+06	201.255	211.861	206.558
rob	16132213	1383601	b4396	4632464	4633333	-	289	COG2207K	P	right oriC-binding transcriptional activator, AraC family	4	4	1895971	1.4579e+06	2.11304e+06	2.05874e+06	243.365	237.111	240.238
creA	16132214	3848	b4397	4633544	4634017	+	157	COG3045S	P	conserved protein	4	4	1.79397e+06	1434850	1.62146e+06	1.21251e+06	186.748	139.648	163.198
arcA	16132218	1383602	b4401	4637613	4638329	-	238	COG0745TK	P	DNA-binding response regulator in two-component regulatory system with ArcB or CpxA	10	10	16157273	16620784	16396060	16284372	1888.38	1875.52	1881.95
yjtD	16132220	1383604	b4403	4638965	4639651	+	228	COG0565J	P	predicted rRNA methyltransferase	3	3	543954	557539	584914	627993	67.3662	72.3277	69.847
pcnB	162135892	3029	b0143	157729	159126	-	465	COG0617J	P	poly(A) polymerase I	12	12	5157376	2.61265e+06	2860401	2718236	329.44	313.067	321.254
hrpB	162135893	1383605	b0148	162105	164534	+	809	COG1643L	P	predicted ATP-dependent helicase	1	1	178981	164924
frmR	162135894	3074	b0357	378830	379105	-	91	COG1937S	P	regulator protein that represses frmRAB operon	1	1	944588	799588
ybiH	162135896	3160	b0796	829195	829866	-	223	-	C	predicted DNA-binding transcriptional regulator	1	1	240029	162522
rlmF	162135897	1383607	b0807	841555	842481	+	308	COG3129R	P	23S rRNA mA1618 methyltransferase, SAM-dependent	3	3	492891	579538	588373	738473	67.7646	85.052	76.4083
dhaK	162135900	3235	b1200	1248991	1250061	-	356	COG2376G	C	dihydroxyacetone kinase, PTS-dependent, dihydroxyacetone-binding subunit	8	8	609070	861949	609968	660773	70.2517	76.103	73.1774
yciO	162135901	3246	b1267	1322122	1322742	+	206	COG0009J	P	predicted RNA binding protein	5	5	2715411	2.48906e+06	2.38474e+06	2196865	274.657	253.019	263.838
pbpG	162135905	1383611	b2134	2221960	2222892	-	310	COG1686M	P	D-alanyl-D-alanine endopeptidase	4	4	536123	501498	676885	621143	77.9587	71.5388	74.7487
frlR	162135910	1383615	b3375	3502074	3502805	+	243	COG2188K	P	predicted DNA-binding transcriptional regulator	2	2	259307	292331	434966	318093	50.0962	36.6357	43.366
mrcA	162135911	1383616	b3396	3520893	3523445	+	850	COG5009M	P	fused penicillin-binding protein 1a: murein transglycosylase/murein transpeptidase	16	15	1095935	860269	1.04997e+06	860475	120.928	99.1033	110.016
envC	162135913	3702	b3613	3784861	3786120	+	419	COG4942D	P	activator of AmiB,C murein hydrolases, septal ring factor	7	7	510897	468955	730799	738543	84.1681	85.0601	84.6141
ytfB	162135916	1383619	b4206	4426102	4426740	-	212	COG3061M	P	predicted cell envelope opacity-associated protein	4	4	842773	729866	1.39763e+06	1.2365e+06	160.969	142.412	151.69
fecB	162135917	3824	b4290	4511429	4512331	-	300	COG4594P	C	KpLE2 phage-like element; iron-dicitrate transporter subunit	2	2	401112	478498	501715	616110	57.784	70.9591	64.3715
msrC	171701682	1383621	b1832	1913655	1914152	-	165	COG1956T	P	free methionine-(R)-sulfoxide reductase	7	7	6.59121e+06	7729803	4576867	4941961	527.131	569.18	548.155
mukE	226524705	3186	b0923	974845	975549	+	234	COG3095D	C	chromosome condensin MukBEF, MukE subunit	1	1	3.55779e+06	2.51599e+06
dhaM	226524708	3235	b1198	1246919	1248337	-	472	COG1080G	C	fused predicted dihydroxyacetone-specific PTS enzymes: HPr component/EI component	14	14	2.87584e+06	2399476	2.90276e+06	2.38793e+06	334.319	275.024	304.672
mpaA	226524711	1383630	b1326	1387894	1388622	-	242	COG2866E	P	murein peptide amidase A	1	1	684478	512872
curA	226524714	1383632	b1449	1517051	1518088	+	345	COG2130R	P	curcumin/dihydrocurcumin reductase, NADPH-dependent	4	4	556294	241372	2.47354e+06	1.91181e+06	284.884	220.188	252.536
hda	226524737	3475	b2496	2616097	2616798	-	233	COG0593L	P	ATPase regulatory factor involved in DnaA inactivation	2	2	283413	360973	402082	360723	46.3089	41.5455	43.9272
hypE	226524740	3522	b2730	2851276	2852286	+	336	COG0309O	P	carbamoyl dehydratase, hydrogenases 1,2,3 maturation protein	1	1	177557	137803
ygdG	226524743	3538	b2798	2929077	2929832	+	251	COG0258L	P	Ssb-binding protein, misidentified as ExoIX	2	2	273906	314646	266167	288980	30.6552	33.2827	31.9689
rimP	226524751	3615	b3170	3315576	3316028	-	150	COG0779S	P	ribosome maturation factor for 30S subunits	2	2	1.5202e+06	532959	3.60665e+06	1.79432e+06	415.388	206.657	311.023
yhhJ	226524752	3677	b3485	3623702	3624826	-	374	COG0842V	P	Predicted permease subunit, ABC transporter superfamily, inner membrane protein	1	1	374960	279070
yhjK	226524755	3684	b3529	3681653	3683641	-	662	COG2200T	P	predicted diguanylate cyclase	5	5	312139	298368	360693	296117	41.542	34.1046	37.8233
bcsC	226524756	3684	b3530	3683723	3687196	-	1157	COG5010U	P	cellulose synthase subunit	1	1		20916.6
waaB	226524757	3706	b3628	3801081	3802160	-	359	COG0438M	P	UDP-D-galactose:(glucosyl)lipopolysaccharide-1,6-D-galactosyltransferase	4	4	467136	361518	430524	259276	49.5847	29.8615	39.7231
hsdR	226524764	1383660	b4350	4581272	4584784	-	1170	COG4096V	P	endonuclease R Type I restriction enzyme	8	8	50331	110825	371192	360556	42.7512	41.5263	42.1388
rpsF	296044035	3812	b4200	4423141	4423536	+	131	COG0360J	C	30S ribosomal subunit protein S6	8	8	95547672	97536552	91730000	94988488	10564.8	10940.1	10752.4
cobB	308209619	1383663	b1120	1178854	1179582	+	242	COG0846K	P	deacetylase of acs and cheY, regulates chemotaxis	4	4	1.17381e+06	1.08614e+06	1.35001e+06	1.3492e+06	155.484	155.391	155.438
gltB	308209621	3625	b3212	3352747	3357207	+	1486	COG0069E	C	glutamate synthase, large subunit	67	67	27690478	28762848	21519576	20766262	2478.47	2391.71	2435.09
yidR	308209622	1383665	b3689	3866085	3867332	-	415	COG0823U	P	conserved protein	7	7	752150	504534	849168	830270	97.8011	95.6245	96.7128
thiG	33347812	3774	b3991	4189888	4190658	-	256	COG2022H	P	thiamin biosynthesis ThiGH complex subunit	10	10	11147205	10533890	11010518	10135751	1268.11	1167.36	1217.74
malZ	345452716	1383667	b0403	421742	423556	+	604	-	P	maltodextrin glucosidase	4	4	1.10891e+06	1.04082e+06	232372	246006	26.763	28.3332	27.5481
entD	345452717	1383668	b0583	608682	609302	-	206	-	P	phosphopantetheinyltransferase component of enterobactin synthase multienzyme complex	1	1	157815	87404.6
manZ	345452720	1383671	b1819	1901919	1902770	+	283	-	C	mannose-specific enzyme IID component of PTS	7	7	15821193	14643929	12967094	11734410	1493.46	1351.48	1422.47
ascG	345452722	1383673	b2714	2836276	2837286	-	336	-	P	DNA-binding transcriptional repressor	1	1	85050.1	323699
yaeP	49176004	3040	b4406	213925	214125	-	66	-	P	conserved protein	2	2	762593	639304	1.17692e+06	948917	135.549	109.289	122.419
lacI	49176012	3072	b0345	365652	366734	-	360	COG1609K	P	DNA-binding transcriptional repressor	8	8	1.44626e+06	505585	653464	613873	75.2613	70.7015	72.9814
ybaY	49176025	1383681	b0453	474603	475175	+	190	COG3126S	P	outer membrane lipoprotein	4	4	3.64248e+06	3096008	3.83514e+06	3.22891e+06	441.704	371.883	406.794
GALE	49176045	3152	b0759	790262	791278	-	338	COG1087M	P	UDP-galactose-4-epimerase	9	9	2894072	2.50424e+06	3006720	2.41596e+06	346.292	278.253	312.273
flgI	49176076	3218	b1080	1135497	1136594	+	365	COG1706N	C	predicted flagellar basal body protein	3	3	945838	869861	586517	660874	67.5508	76.1147	71.8328
HINT	49176077	3221	b1103	1161108	1161467	+	119	COG0537FGR	P	purine nucleoside phosphoramidase, dadA activator protein	2	2	3549205	2.68738e+06	2916470	2250333	335.898	259.177	297.538
dsbB	49176085	1383684	b1185	1231723	1232253	-	176	COG1495O	P	oxidoreductase that catalyzes reoxidation of DsbA protein disulfide isomerase I	1	1	10218820	8.02144e+06
oppD	49176090	3241	b1246	1302778	1303791	+	337	COG0444EP	C	oligopeptide transporter subunit	4	4	1299085	625361	913999	1243310	105.268	143.196	124.232
manA	49176125	1383689	b1613	1686600	1687775	+	391	COG1482G	P	mannose-6-phosphate isomerase	10	10	6.24607e+06	6.81646e+06	5171095	5.59333e+06	595.57	644.2	619.885
slyB	49176129	1383691	b1641	1717900	1718367	+	155	COG3133M	P	outer membrane lipoprotein	5	5	11064644	16437778	8565630	14457611	986.528	1665.12	1325.83
ydhF	49176131	3309	b1647	1722760	1723656	-	298	COG4989R	P	predicted oxidoreductase	3	3	4.10069e+06	3.36351e+06	1.73211e+06	1.67578e+06	199.492	193.004	196.248
mdtK	49176133	1383693	b1663	1741481	1742854	+	457	COG0534V	P	multidrug efflux system transporter	2	2	655240	507518	1107620	969454	127.568	111.655	119.611
rpmI	49176137	1383694	b1717	1797826	1798023	-	65	COG0291J	P	50S ribosomal subunit protein L35	1	1	6527594	5.13348e+06
pfkB	49176138	1383695	b1723	1804394	1805323	+	309	COG1105G	P	6-phosphofructokinase II	7	7	1.86099e+06	1.4044e+06	1.5584e+06	1.21173e+06	179.485	139.558	159.522
katE	49176140	1383696	b1732	1811891	1814152	+	753	COG0753P	P	catalase HPII, heme d-containing	19	19	5286944	4.55414e+06	4.85971e+06	4.22003e+06	559.706	486.033	522.87
proQ	49176156	3341	b1831	1912860	1913558	-	232	COG3109T	P	RNA chaperone, probable regulator of ProP translation	8	8	15515282	14860948	10842872	10765696	1248.8	1239.92	1244.36
fliA	49176170	3365	b1922	1999094	1999813	-	239	COG1191K	P	RNA polymerase, sigma 28 (sigma F) factor	3	3	585690	726422	871617	1.12685e+06	100.387	129.782	115.084
flu	49176177	1383698	b2000	2069563	2072682	+	1039	COG3468MU	P	CP4-44 prophage; antigen 43 (Ag43) phase-variable biofilm formation autotransporter	11	11	2.26029e+06	1.57023e+06	1.97533e+06	1811835	227.505	208.674	218.089
nuoA	49176207	3428	b2288	2402651	2403094	-	147	COG0838C	C	NADH:ubiquinone oxidoreductase, membrane subunit A	2	2	4.44776e+06	4.07986e+06	4.13635e+06	3.93179e+06	476.396	452.835	464.616
yfcE	49176208	3432	b2300	2417256	2417810	-	184	COG0622R	P	phosphodiesterase activity on bis-pNPP	2	2	1.49334e+06	1351304	1.11626e+06	1.00619e+06	128.562	115.885	122.224
iscS	49176235	3484	b2530	2658339	2659553	-	404	COG1104E	P	cysteine desulfurase (tRNA sulfurtransferase), PLP-dependent	22	22	38540264	35307500	33036828	30055850	3804.94	3461.62	3633.28
purL	49176239	1383700	b2557	2689678	2693565	-	1295	COG0046F	P	phosphoribosylformyl-glycineamide synthetase	51	51	12525605	13217729	11390869	9643764	1311.92	1110.7	1211.31
tktA	49176286	1383704	b2935	3077666	3079657	-	663	COG0021G	P	transketolase 1, thiamin-binding	21	21	34477772	39202444	32730636	37520528	3769.68	4321.34	4045.51
arcB	49176326	3624	b3210	3348711	3351047	-	778	COG0642T	P	aerobic respiration control sensor histidine protein kinase, cognate to two-component response regulators ArcA and RssB	7	7	664287	619037	855268	875327	98.5036	100.814	99.6587
nanR	49176329	1383708	b3226	3371720	3372511	-	263	COG2186K	P	DNA-binding transcriptional repressor of the nan operon, induced by sialic acid	5	5	1.33274e+06	1292369	1131583	1.19935e+06	130.328	138.133	134.23
yhdP	49176330	1383709	b4472	3390480	3394280	-	1266	COG3164S	P	conserved membrane protein, predicted transporter	4	4	164643	97514.4	449721	454169	51.7956	52.3079	52.0518
gntT	49176350	1383710	b3415	3544581	3545897	+	438	COG2610GE	P	gluconate transporter, high-affinity GNT I system	3	3	540074	465687	438863	358912	50.545	41.3369	45.941
malP	49176351	3662	b3417	3548102	3550495	-	797	COG0058G	P	maltodextrin phosphorylase	17	17	3.18943e+06	3.58292e+06	3.73037e+06	3.65992e+06	429.638	421.523	425.58
gntU	49176355	3666	b4476	3573744	3575084	-	446	COG2610GE	P	gluconate transporter, low affinity GNT 1 system	1	1	206262	91542.8
gntR	49176356	1383711	b3438	3575754	3576749	-	331	COG1609K	P	DNA-binding transcriptional repressor	1	1	909382	701310
livJ	49176358	1383712	b3460	3596578	3597681	-	367	COG0683E	C	leucine/isoleucine/valine transporter subunit	19	19	93936864	84817712	72698048	65966592	8372.84	7597.56	7985.2
rbbA	49176363	3677	b3486	3624826	3627561	-	911	COG1131V	P	fused ribosome-associated ATPase: ATP-binding protein/ATP-binding protein/predicted membrane protein	4	4	406270	393488	827468	714059	95.3018	82.2401	88.771
yiaD	49176370	3688	b3552	3714570	3715229	+	219	COG2885M	P	multicopy suppressor of bamB; outer membrane lipoprotein	5	5	842495	764815	878652	802809	101.197	92.4618	96.8293
avtA	49176374	1383716	b3572	3737728	3738981	+	417	COG3977E	P	valine-pyruvate aminotransferase 1	6	6	5063097	3.73791e+06	4.43248e+06	3.55887e+06	510.501	409.885	460.193
dgoR	49176392	3718	b4479	3872494	3873183	-	229	COG2186K	P	predicted DNA-binding transcriptional regulator	2	2	160575	97882.2	381635	415910	43.954	47.9016	45.9278
gyrB	49176395	3719	b3699	3875728	3878142	-	804	COG0187L	P	DNA gyrase, subunit B	27	27	9808183	9308179	8478084	8085093	976.445	931.183	953.814
kup	49176400	1383719	b3747	3929339	3931207	+	622	COG3158P	P	potassium transporter	3	3	555151	691655	1.18587e+06	1.19833e+06	136.58	138.015	137.298
yieP	49176401	3733	b3755	3938658	3939350	-	230	COG2186K	P	predicted transcriptional regulator	3	3	597508	594939	973968	1245616	112.175	143.461	127.818
hdfR	49176402	1383720	b4480	3945151	3945990	-	279	COG0583K	P	DNA-binding transcriptional regulator	3	3	22085156	10108783	2160033	1.48982e+06	248.777	171.587	210.182
ilvE	49176403	3735	b3770	3950507	3951436	+	309	COG0115EH	P	branched-chain amino-acid aminotransferase	10	10	24217306	23324134	22571702	22301220	2599.65	2568.49	2584.07
ilvD	49176404	3735	b3771	3951501	3953351	+	616	COG0129EG	P	dihydroxyacid dehydratase	22	22	10047961	10005466	8411816	8199829	968.812	944.397	956.605
rep	49176407	1383721	b3778	3958700	3960721	+	673	COG0210L	P	DNA helicase and single-stranded DNA-dependent ATPase	4	4	363885	284332	519447	417085	59.8261	48.0368	53.9315
gpp	49176408	1383722	b3779	3960768	3962252	-	494	COG0248FP	P	guanosine pentaphosphatase/exopolyphosphatase	6	6	982376	1.07987e+06	1.17477e+06	1.22976e+06	135.302	141.635	138.469
wecB	49176409	3736	b3786	3968156	3969286	+	376	COG0381M	P	UDP-N-acetyl glucosamine-2-epimerase	3	3	213995	316213	1.01965e+06	984752	117.436	113.417	115.426
wecC	49176410	3736	b3787	3969283	3970545	+	420	COG0677M	P	UDP-N-acetyl-D-mannosaminuronic acid dehydrogenase	5	5	931740	1.01818e+06	744051	790675	85.6945	91.0643	88.3794
rffG	49176411	3736	b3788	3970545	3971612	+	355	COG1088M	P	dTDP-glucose 4,6-dehydratase	4	4	357037	386128	597719	365172	68.8409	42.0579	55.4494
wecF	49176413	3736	b4481	3975548	3976627	+	359	-	P	TDP-Fuc4NAc:lipidIIFuc4NAc transferase	2	2	65505.6	115250	361865	372320	41.677	42.8812	42.2791
hemC	49176416	3737	b3805	3987848	3988789	-	313	COG0181H	P	hydroxymethylbilane synthase	10	10	2.20774e+06	2.26897e+06	2024713	1.98541e+06	233.192	228.665	230.929
yigL	49176424	3741	b3826	4008223	4009023	+	266	COG0561R	P	predicted hydrolase	5	5	831970	754949	849287	754172	97.8147	86.8601	92.3374
ysgA	49176425	1383727	b3830	4013377	4014192	-	271	COG0412Q	P	predicted hydrolase	4	3	2.74497e+06	2.57575e+06	1.7557e+06	1.48009e+06	202.209	170.466	186.338
ubiE	49176426	3742	b3833	4016878	4017633	+	251	COG2226H	P	bifunctional 2-octaprenyl-6-methoxy-1,4-benzoquinone methylase/ S-adenosylmethionine:2-DMK methyltransferase	10	10	4.29921e+06	5058010	4295842	5109365	494.764	588.46	541.612
tatB	49176428	3743	b3838	4020241	4020756	+	171	COG1826U	C	TatABCE protein translocation system subunit	6	6	580745	467683	510855	397369	58.8366	45.7661	52.3013
fadA	49176430	3745	b3845	4025632	4026795	-	387	COG0183I	C	3-ketoacyl-CoA thiolase (thiolase I)	4	4	335800	497332	855184	894068	98.4939	102.972	100.733
typA	49176434	1383728	b3871	4056430	4058253	+	607	COG1217T	P	GTP-binding protein	22	22	26176436	26308104	19403176	20105014	2234.72	2315.55	2275.13
sodA	49176442	1383730	b3908	4098833	4099453	+	206	COG0605P	P	superoxide dismutase, Mn	10	10	37817516	45021820	46678652	59148280	5376.11	6812.27	6094.19
thiS	49176448	3774	b4407	4190660	4190860	-	66	COG2104H	P	immediate sulfur donor in thiazole formation	1	1	167826	213265
NUDC	49176450	3775	b3996	4194926	4195699	+	257	COG2816L	P	NADH pyrophosphatase	3	3	889554	774200	1.01704e+06	853859	117.135	98.3413	107.738
ecnB	49176463	1383734	b4411	4374576	4374722	+	48	COG5510S	P	entericidin B membrane lipoprotein	1	1	44279464	38764584
yjgM	49176479	1383736	b4256	4477057	4477560	-	167	COG1246E	P	predicted acetyltransferase	4	4	1.00005e+06	1.1622e+06	1.53727e+06	1.83546e+06	177.051	211.395	194.223
fimC	49176488	3831	b4316	4542327	4543052	+	241	COG3121NU	P	chaperone, periplasmic	4	4	2765451	3.12885e+06	2.49518e+06	2.72186e+06	287.377	313.485	300.431
trxA	67005950	1383740	b3781	3963784	3964113	+	109	COG3118O	P	thioredoxin 1	3	3	14220863	12126224	9083977	7520724	1046.23	866.183	956.205
leuB	90111082	3017	b0073	80867	81958	-	363	COG0473CE	P	3-isopropylmalate dehydrogenase, NAD(+)-dependent	11	11	22346344	19493048	17030346	14719405	1961.43	1695.28	1828.35
ilvI	90111084	3018	b0077	85630	87354	+	574	COG0028EH	C	acetolactate synthase III, large subunit	17	17	9892364	9919200	9925853	9885206	1143.19	1138.51	1140.85
yacL	90111086	1383743	b0119	134388	134750	+	120	COG3112S	P	conserved protein	1	1	502708	242543
hpt	90111088	1383745	b0125	141431	141967	+	178	COG0634F	P	hypoxanthine phosphoribosyltransferase	4	4	3.09863e+06	3.49632e+06	4.62416e+06	4.35951e+06	532.577	502.097	517.337
cdsA	90111095	3037	b0175	195677	196534	+	285	COG0575I	C	CDP-diglyceride synthase	1	1	527735	469757
fadE	90111100	1383750	b0221	240859	243303	-	814	COG1960I	P	acyl coenzyme A dehydrogenase	6	6	1.25512e+06	853036	1.12274e+06	1292483	129.309	148.859	139.084
rclA	90111112	1383752	b0304	317900	319225	-	441	COG1249C	P	predicted pyridine nucleotide-disulfide oxidoreductase	3	3	208361	136325	266368	170945	30.6784	19.6883	25.1833
yaiL	90111118	1383755	b0354	375996	376535	+	179	COG3122S	P	predicted protein	1	1	1.29674e+06	1.25896e+06
tauA	90111122	3076	b0365	384456	385418	+	320	COG4521P	C	taurine transporter subunit	5	5	14121392	19999586	46041.3	46429.8	5.3027	5.34746	5.32508
hemB	90111123	1383757	b0369	387977	388951	-	324	COG0113H	P	5-aminolevulinate dehydratase (porphobilinogen synthase)	9	9	9641458	8408914	6.12275e+06	5.57823e+06	705.175	642.46	673.817
yaiI	90111127	1383759	b0387	404988	405446	+	152	COG1671S	P	conserved protein, UPF0178 family, downregulated by beryllium	2	2	270290	382522	822656	860857	94.7476	99.1473	96.9475
MAK	90111128	1383760	b0394	409368	410276	+	302	COG1940KG	P	manno(fructo)kinase	5	5	1.10196e+06	1.14553e+06	976266	944716	112.439	108.806	110.622
yajO	90111130	1383762	b0419	436385	437359	-	324	COG0667C	P	2-carboxybenzaldehyde reductase, function unknown	4	4	2.06653e+06	1.9268e+06	1277050	1.20688e+06	147.081	139	143.041
yajL	90111131	3088	b0424	442275	442865	-	196	COG0693R	P	Oxidative-stress-resistance chaperone	4	4	1.36342e+06	1.30369e+06	1.21795e+06	1.27146e+06	140.275	146.438	143.357
yajQ	90111132	1383763	b0426	443907	444398	+	163	COG1666S	P	Phi6 host factor; binds ATP and GTP	9	9	12907758	14628223	9332588	10594918	1074.86	1220.25	1147.55
yajG	90111134	3090	b0434	452813	453391	-	192	COG3056M	P	predicted lipoprotein	4	4	19511752	17831612	19677396	17874476	2266.3	2058.65	2162.48
bolA	90111135	1383765	b0435	453696	454013	+	105	COG0271T	P	stationary-phase morphogene, transcriptional repressor for mreB; also regulator for dacA, dacC, and ampC	2	2	79316.6	222226	105438	288792	12.1436	33.261	22.7023
ylaC	90111139	1383768	b0458	478005	478475	-	156	-	P	inner membrane protein, DUF1449 family	3	3	383746	279324	397001	300560	45.7238	34.6164	40.1701
fetB	90111141	3101	b0491	515807	516586	+	259	COG0390R	P	inner membrane protein, UPF0014 family	1	1	260577	217610
ybbN	90111142	3102	b0492	516649	517503	-	284	COG3118O	P	DnaK co-chaperone, thioredoxin-like protein	12	12	6.41592e+06	4.74518e+06	4.69973e+06	3202394	541.281	368.829	455.055
ybcJ	90111146	3111	b0528	555884	556096	-	70	COG2501S	P	Ribosome-associated protein; predicted RNA-binding protein	3	3	2.3167e+06	2.66879e+06	1.89737e+06	2100543	218.525	241.925	230.225
dsbG	90111151	1383772	b0604	637050	637796	-	248	COG1651O	P	thiol:disulfide interchange protein, periplasmic	4	4	212153	210028	965387	916718	111.186	105.581	108.384
ahpF	90111152	1383773	b0606	638976	640541	+	521	COG3634O	C	alkyl hydroperoxide reductase, F52a subunit, FAD/NAD(P)-binding	20	20	21500974	21844528	11618799	10097851	1338.17	1163	1250.58
lipB	90111156	3127	b0630	660860	661501	-	213	COG0321H	P	octanoyltransferase; octanoyl-[ACP]:protein N-octanoyltransferase	2	2	624638	542762	520712	418148	59.9719	48.1593	54.0656
rsfS	90111157	3128	b0637	667942	668259	-	105	COG0799S	P	ribosome-associated protein	3	3	1.8843e+06	979663	777439	894355	89.5399	103.005	96.2726
ybfE	90111159	1383776	b0685	710828	711121	-	97	-	P	LexA-regulated conserved protein	2	2	428599	373230	503131	595971	57.9471	68.6396	63.2933
cydA	90111166	3148	b0733	770681	772249	+	522	COG1271C	C	cytochrome d terminal oxidase, subunit I	6	6	2433877	2216553	3.42784e+06	2.96752e+06	394.794	341.778	368.286
ybiX	90111170	3162	b0804	837753	838430	-	225	COG3128S	P	conserved protein, Fe(II)-dependent oxygenase superfamily	9	9	3.64662e+06	3.59202e+06	3.82226e+06	4555588	440.22	524.68	482.45
fsaA	90111174	1383781	b0825	862865	863527	+	220	COG0176G	P	fructose-6-phosphate aldolase 1	1	1	236583	182584
gstB	90111175	1383782	b0838	879077	879703	-	208	COG0625O	P	glutathione S-transferase	9	9	12845393	12420405	9894894	8.23603e+06	1139.62	948.566	1044.09
ybjI	90111176	3170	b0844	884539	885354	-	271	COG0561R	P	FMN and erythrose-4-P phosphatase	2	2	430394	357535	1.37524e+06	1.22716e+06	158.391	141.335	149.863
potG	90111177	3172	b0855	894214	895347	+	377	COG3842E	C	putrescine transporter subunit: ATP-binding component of ABC superfamily	5	5	1.51467e+06	1.07346e+06	1.27489e+06	909107	146.833	104.704	125.769
ybjS	90111178	3175	b0868	904963	905976	-	337	COG0451MG	P	predicted NAD(P)H-binding oxidoreductase with NAD(P)-binding Rossmann-fold domain	3	3	319732	152442	559020	394150	64.3839	45.3953	54.8896
ybjT	90111179	3175	b0869	906075	907505	-	476	COG0702MG	P	conserved protein with NAD(P)-binding Rossmann-fold domain	3	3	160511	145251	478918	339023	55.1584	39.0462	47.1023
macA	90111182	3177	b0878	918458	919573	+	371	COG0845M	C	macrolide transporter subunit, membrane fusion protein (MFP) component	9	9	1.45812e+06	1.21305e+06	1.0599e+06	1.15606e+06	122.072	133.147	127.609
ycaO	90111185	1383785	b0905	954095	955855	-	586	COG1944S	P	ribosomal protein S12 methylthiotransferase accessory factor	7	7	4.36809e+06	4660703	4.22968e+06	4315525	487.144	497.031	492.088
mgsA	90111195	1383789	b0963	1025780	1026238	-	152	COG1803G	P	methylglyoxal synthase	4	4	2.06644e+06	2.40106e+06	2.1805e+06	2.51872e+06	251.135	290.088	270.612
yccU	90111196	1383790	b0965	1027169	1027582	+	137	COG1832R	P	predicted CoA-binding protein with NAD(P)-binding Rossmann-fold domain	7	7	6.42859e+06	2.15179e+06	3.79107e+06	2.51963e+06	436.628	290.192	363.41
tusE	90111197	1383791	b0969	1029562	1029891	-	109	COG2920P	P	sulfurtransferase required for 2-thiolation step of mnm(5)-s(2)U34-tRNA synthesis	1	1	441569	470989
ghra	90111205	3207	b1033	1097109	1098047	+	312	COG0111HE	P	glyoxylate/hydroxypyruvate reductase A	12	12	4.20502e+06	3.45458e+06	5.638e+06	5336636	649.344	614.635	631.99
msyB	90111208	1383794	b1051	1113030	1113404	-	124	-	P	multicopy suppressor of secY and secA	3	3	3.53963e+06	2138616	9022523	5.02094e+06	1039.15	578.276	808.713
yceF	90111211	1383796	b1087	1145234	1145818	-	194	COG0424D	P	Maf-like protein	4	4	628309	1.03498e+06	7512621	7.37639e+06	865.25	849.56	857.405
plsX	90111212	3219	b1090	1146844	1147914	+	356	COG0416I	P	probable phosphate acyltransferase	3	3	276323	226788	472328	416737	54.3994	47.9968	51.1981
ycfP	90111213	3221	b1108	1164366	1164908	+	180	COG3150R	P	conserved protein	6	6	1.59077e+06	1767863	1.55079e+06	1.68151e+06	178.609	193.664	186.137
lolD	90111215	3222	b1117	1175842	1176543	+	233	COG1136V	C	outer membrane-specific lipoprotein transporter subunit	4	4	455683	546427	501810	505419	57.7948	58.2105	58.0027
roxA	90111217	1383798	b1128	1186342	1187463	-	373	COG2850S	P	cupin superfamily protein	6	6	1953336	4088625	3400941	3843798	391.696	442.701	417.198
mnmA	90111218	3225	b1133	1191890	1192996	-	368	COG0482J	P	tRNA (5-methylaminomethyl-2-thiouridylate)-methyltransferase	7	7	1.01838e+06	976696	1.50946e+06	1.1753e+06	173.849	135.363	154.606
cvrA	90111230	1383803	b1191	1239558	1241294	-	578	COG3263P	P	predicted cation/proton antiporter	4	4	1.48155e+06	1.1999e+06	1.23202e+06	1.1455e+06	141.895	131.93	136.913
emtA	90111231	1383804	b1193	1242403	1243014	+	203	COG0741M	P	lytic murein endotransglycosylase E	5	5	1689674	1.2762e+06	1.84892e+06	1350358	212.946	155.525	184.235
yciU	90111236	3242	b1248	1304845	1305174	-	109	COG3099S	P	conserved protein, UPF0263 family	1	1	2.6507e+06	2.66967e+06
yciH	90111241	3250	b1282	1340682	1341008	+	108	COG0023J	P	initiation factor function partial mimic, SUI1 family	2	2	282544	464765	692404	990367	79.7461	114.063	96.9048
yciW	90111242	3251	b1287	1347004	1348131	-	375	COG4950S	P	predicted oxidoreductase	2	2	783753	963168	916136	1.06407e+06	105.514	122.552	114.033
puuA	90111244	1383810	b1297	1357514	1358932	-	472	COG0174E	P	gamma-Glu-putrescine synthase	4	4	775293	421406	704981	714345	81.1947	82.2731	81.7339
puuD	90111245	3253	b1298	1359144	1359908	+	254	COG2071R	P	gamma-Glu-GABA hydrolase	1	1	85048.2	37498.2
pspF	90111246	1383811	b1303	1364959	1365936	-	325	COG1221KT	P	DNA-binding transcriptional activator	1	1	38087.1	13196.7
ycjG	90111249	1383812	b1325	1386954	1387919	+	321	COG4948MR	P	L-Ala-D/L-Glu epimerase	2	2	486713	242855	336328	274033	38.7359	31.5612	35.1485
mppA	90111250	1383813	b1329	1391251	1392864	+	537	COG4166E	P	murein tripeptide (L-ala-gamma-D-glutamyl-meso-DAP) transporter subunit	7	7	9368183	1.27845e+06	9128492	1.20945e+06	1051.35	139.295	595.325
ydaM	90111253	1383814	b1341	1404587	1405819	-	410	COG2199T	P	diguanylate cyclase, csgD regulator	3	3	160324	266259	320765	373273	36.9435	42.9909	39.9672
uspF	90111262	1383816	b1376	1433209	1433643	-	144	COG0589T	P	stress-induced protein, ATP-binding protein	2	2	602563	499217	545778	465860	62.8588	53.6544	58.2566
ydcI	90111269	1383820	b1422	1492172	1493095	-	307	COG0583K	P	predicted DNA-binding transcriptional regulator	4	4	1.17307e+06	1239026	4.40552e+06	7.04829e+06	507.396	811.772	659.584
ydcP	90111273	1383823	b1435	1504805	1506766	+	653	COG0826O	P	predicted peptidase	5	5	682188	761868	519970	619124	59.8864	71.3062	65.5963
adhP	90111280	1383828	b1478	1550852	1551862	-	336	COG1064R	P	ethanol-active dehydrogenase/acetaldehyde-active reductase	1	1	417403	398926
MAEA	90111281	1383829	b1479	1551996	1553693	-	565	COG0281C	P	malate dehydrogenase, (decarboxylating, NAD-requiring) (malic enzyme)	14	13	4.68368e+06	4.58001e+06	5.69999e+06	6629287	656.484	763.514	709.999
SAD	90111288	3286	b1525	1611339	1612727	-	462	COG1012C	P	succinate semialdehyde dehydrogenase, NAD(P)+-dependent	7	7	717531	860495	967994	786916	111.487	90.6313	101.059
gnsb	90111293	1383835	b1550	1635633	1635806	-	57	-	P	Qin prophage; multicopy suppressor of secG(Cs) and fabA6(Ts)	4	4	3.48764e+06	4.62626e+06	1.90867e+06	2761917	219.827	318.098	268.963
ynfC	90111299	1383837	b1585	1654771	1655481	-	236	-	P	lipoprotein, UPF0257 family	2	2	265870	200086	168424	168698	19.3979	19.4294	19.4136
dmsD	90111302	3298	b1591	1662530	1663144	+	204	COG3381R	P	twin-argninine leader-binding protein for DmsA and TorA	1	1	2133573	1.64896e+06
ydgJ	90111307	1383841	b1624	1701292	1702332	-	346	COG0673R	P	predicted oxidoreductase	6	7	464096	536173	789071	696081	90.8795	80.1696	85.5246
mliC	90111309	1383843	b1639	1716090	1716419	-	109	COG3895R	P	inhibitor of c-type lysozyme, membrane-bound; predicted lipoprotein	1	1	117110	59552.4
slyA	90111310	1383844	b1642	1718414	1718848	-	144	COG1846K	P	DNA-binding transcriptional activator	4	4	3.73362e+06	3494152	3758660	3465671	432.895	399.151	416.023
ydhJ	90111311	3308	b1644	1719288	1720145	+	285	COG1566V	P	predicted membrane fusion protein (MFP) of YdhJK efflux pump	2	2	151881	111550	185707	166379	21.3884	19.1623	20.2754
sufB	90111315	3312	b1683	1760546	1762033	-	495	COG0719O	P	component of SufBCD complex	14	14	2140665	2.03867e+06	2.76513e+06	2.49165e+06	318.468	286.97	302.719
ydjY	90111322	3325	b1751	1832140	1832817	+	225	-	P	predicted protein	1	1	224283	251111
ynjB	90111323	3325	b1754	1834097	1835263	+	388	COG4134R	P	conserved protein	2	2	238154	210082	953588	512681	109.827	59.0469	84.4372
ynjE	90111324	1383847	b1757	1837491	1838798	+	435	COG2897P	P	predicted thiosulfate sulfur transferase	1	1	258513	253944
pncA	90111327	3327	b1768	1849911	1850552	+	213	COG1335Q	P	nicotinamidase/pyrazinamidase	2	2	2497843	1855731	1.94308e+06	1.5283e+06	223.79	176.018	199.904
yeaC	90111329	3329	b1777	1859726	1859998	-	90	COG3139S	P	conserved protein	1	1		297026
yeaD	90111330	1383850	b1780	1861874	1862758	+	294	COG0676G	P	conserved protein	8	8	3.77113e+06	3662543	6756318	7398015	778.144	852.05	815.097
yeaJ	90111331	3331	b1786	1870065	1871555	+	496	COG2199T	P	predicted diguanylate cyclase	1	1	208705	141347
yeaO	90111333	3332	b1792	1874933	1875280	+	115	COG3189S	P	conserved protein	3	3	375516	349353	424410	269887	48.8805	31.0837	39.9821
yoaB	90111336	1383853	b1809	1891391	1891735	+	114	COG0251J	P	conserved protein, UPF0076 famiily	4	4	3482633	3.96687e+06	4505162	5.08174e+06	518.872	585.278	552.075
yebT	90111340	3342	b1834	1915534	1918167	+	877	COG3008R	P	conserved protein	7	7	1.39716e+06	1574384	703333	722542	81.0048	83.2172	82.111
rsmF	90111341	1383856	b1835	1918247	1919686	+	479	COG0144J	P	16S rRNA m(5)C1407 methyltransferase, SAM-dependent	4	4	490757	621191	1.1856e+06	1293656	136.549	148.994	142.771
yebV	90111342	3343	b1836	1919804	1920040	+	78	-	P	predicted protein	2	2	679792	657440	814166	775167	93.7698	89.2782	91.524
znuA	90111346	3348	b1857	1939675	1940607	-	310	COG4531P	P	zinc transporter subunit: periplasmic-binding component of ABC superfamily	13	13	40697704	46132088	40208256	48540592	4630.9	5590.56	5110.73
yecD	90111348	3352	b1867	1948856	1949422	+	188	COG1335Q	P	isochorismatase family protein	4	4	519351	507842	613733	588232	70.6854	67.7483	69.2168
yecN	90111349	3352	b1869	1950290	1950685	+	131	COG3788R	P	inner membrane protein, MAPEG family	1	1	641300	264625
CUTC	90111351	3355	b1874	1956544	1957290	-	248	COG3142P	P	copper homeostasis protein	2	2	798386	989849	596678	717163	68.721	82.5977	75.6593
yecM	90111352	3355	b1875	1957304	1957870	-	188	COG3102S	P	predicted metal-binding enzyme	4	4	461828	570513	593751	563757	68.384	64.9294	66.6567
uvrC	90111354	3363	b1913	1990898	1992730	-	610	COG0322L	P	excinuclease UvrABC, endonuclease subunit	3	3	590300	606129	680307	688603	78.3529	79.3084	78.8306
dcyD	90111355	3364	b1919	1996518	1997504	-	328	COG2515E	P	D-cysteine desulfhydrase, PLP-dependent	4	4	5.27764e+06	5295279	6610797	6517455	761.384	750.634	756.009
fliH	90111357	3368	b1940	2013892	2014578	+	228	COG1317NU	C	negative regulator of FliI ATPase activity	2	2	249153	266446	1.32318e+06	1.26819e+06	152.394	146.061	149.227
fliO	90111358	3369	b1947	2019528	2019893	+	121	COG3190N	C	flagellar biosynthesis protein	1	1	124213	123004
yedQ	90111360	1383861	b1956	2024347	2026041	-	564	COG2199T	P	predicted diguanylate cyclase	1	1	141431	103379
yodB	90111363	1383862	b1974	2040392	2040922	+	176	COG3038C	P	cytochrome b561 homolog	2	2	317273	446878
mtfA	90111364	1383863	b1976	2041675	2042472	+	265	COG3228S	P	anti-repressor for DgsA(Mlc)	3	3	827969	767946	799387	686535	92.0676	79.0702	85.5689
plap	90111370	3379	b2014	2083728	2085086	-	452	COG0531E	P	putrescine importer, low affinity	4	4	2.18348e+06	2.71731e+06	2.20114e+06	2794590	253.512	321.861	287.686
hisB	90111373	3382	b2022	2091492	2092559	+	355	COG0131E	P	fused histidinol-phosphatase/imidazoleglycerol-phosphate dehydratase	15	14	18945552	16959778	14478973	12544180	1667.58	1444.75	1556.17
hisA	90111374	3382	b2024	2093149	2093886	+	245	COG0106E	P	N-(5'-phospho-L-ribosyl-formimino)-5-amino-1-(5'-phosphoribosyl)-4-imidazolecarboxamide isomerase	8	8	2.65661e+06	2.64452e+06	2461413	2.46518e+06	283.488	283.922	283.705
wzzB	90111375	1383864	b2027	2095345	2096325	-	326	COG3765M	P	regulator of length of O-antigen component of lipopolysaccharide chains	13	13	11653188	9793320	11243672	9432280	1294.97	1086.34	1190.65
udk	90111379	1383866	b2066	2140331	2140972	-	213	COG0572F	P	uridine/cytidine kinase	5	5	1.09928e+06	1.13866e+06	2.07409e+06	2.28599e+06	238.879	263.284	251.081
yegD	90111380	1383867	b2069	2145698	2147050	+	450	COG0443O	P	predicted chaperone	4	4	1.24949e+06	1394571	302761	298139	34.8699	34.3375	34.6037
mdtA	90111381	3390	b2074	2152040	2153287	+	415	COG0845M	P	multidrug efflux system, subunit A	2	2	164575	116092	262923	157117	30.2816	18.0956	24.1886
yegP	90111382	1383868	b2080	2163213	2163545	+	110	COG3422S	P	conserved protein, UPF0339 family	3	2	591854	660701	589418	717189	67.8849	82.6007	75.2428
gatY	90111384	3392	b2096	2174372	2175226	-	284	COG0191G	P	D-tagatose 1,6-bisphosphate aldolase 2, catalytic subunit	10	10	9914169	13017756	9949075	13190478	1145.86	1519.18	1332.52
fbaB	90111385	1383870	b2097	2175534	2176586	-	350	COG1830G	P	fructose-bisphosphate aldolase class I	10	10	9069180	8.07412e+06	10564786	9291242	1216.78	1070.1	1143.44
mrp	90111388	1383872	b2113	2191081	2192190	-	369	COG0489D	P	antiporter inner membrane protein	8	8	1.22971e+06	1.17049e+06	2.26063e+06	2652796	260.363	305.53	282.946
yehT	90111392	3398	b2125	2210265	2210984	-	239	COG3279KT	P	predicted response regulator in two-component system withYehU	2	2	434704	365243	6591149	3.00689e+06	759.121	346.312	552.717
yeiP	90111399	1383876	b2171	2263472	2264044	+	190	COG0231J	P	elongation factor P-like protein	5	5	5.27673e+06	6.60429e+06	4.19591e+06	5138387	483.254	591.802	537.528
lpxT	90111400	3408	b2174	2266876	2267589	+	237	COG0671I	P	Lipid A 1-diphosphate synthase; undecaprenyl pyrophosphate:lipid A 1-phosphate phosphotransferase	1	1	755147	640324
yejA	90111401	3409	b2177	2270386	2272200	+	604	COG4166E	P	microcin C transporter YejABEF, periplasmic binding protein; ABC family	2	1	114122	112958
menF	90111411	1383879	b2265	2377370	2378665	-	431	COG1169HQ	P	isochorismate synthase 2	2	2	139139	123618	388648	279204	44.7617	32.1567	38.4592
rbn	90111412	1383880	b2268	2379630	2380547	+	305	COG1234R	P	RNase BN, tRNA processing enzyme	2	2	922475	136631	42928.3	27002.7	4.94417	3.10997	4.02707
yfbT	90111414	3430	b2293	2409461	2410111	-	216	COG0637R	P	sugar phosphatas	6	6	1998274	2.13878e+06	1.62729e+06	1.76359e+06	187.419	203.117	195.268
yfbU	90111415	3430	b2294	2410122	2410616	-	164	COG3013S	P	conserved protein, UPF0304 family	12	12	19869516	22672186	19883626	22663092	2290.05	2610.17	2450.11
DEDD	90111417	3436	b2314	2429044	2429706	-	220	COG3147S	P	membrane-anchored periplasmic protein involved in septation	4	4	706717	746945	709194	776756	81.6799	89.4612	85.5705
mnmC	90111418	1383883	b2324	2439786	2441792	+	668	COG4121S	P	fused 5-methylaminomethyl-2-thiouridine-forming enzyme methyltransferase and FAD-dependent demodification enzyme	3	3	633711	822228	351014	608543	40.4273	70.0876	55.2574
prmB	90111419	3438	b2330	2445530	2446462	-	310	COG2890J	P	N5-glutamine methyltransferase	5	5	4.14481e+06	4.86198e+06	3.67919e+06	4561462	423.743	525.356	474.549
yfcZ	90111421	1383884	b2343	2458672	2458956	-	94	COG3691S	P	conserved protein, UPF0381 family	2	2	1.0797e+06	1018480	737897	710509	84.9857	81.8314	83.4085
cysW	90111430	3455	b2423	2538826	2539701	-	291	COG4208P	C	sulfate/thiosulfate ABC transporter subunit	1	1	901835	565090
ucpA	90111431	1383888	b2426	2541854	2542645	-	263	COG1028IQR	P	predicted short-chain oxidoreductase	3	3	656205	881544	682140	1.22761e+06	78.564	141.388	109.976
yfeX	90111433	3457	b2431	2547668	2548567	-	299	COG2837P	P	deferrrochelatase, cytoplasmic	6	6	1.61495e+06	1.24714e+06	1.88752e+06	1281913	217.391	147.642	182.516
ypeA	90111435	3458	b2434	2549735	2550160	-	141	COG0456R	P	predicted acyltransferase with acyl-CoA N-acyltransferase domain	2	2	960102	1.09147e+06	575080	762478	66.2336	87.8167	77.0251
eutB	90111437	3460	b2441	2555340	2556701	-	453	COG4303E	P	ethanolamine ammonia-lyase, large subunit, heavy chain	1	1	239993	171713
ypfH	90111441	3470	b2473	2591094	2591792	-	232	COG0400R	P	predicted hydrolase	2	2	477497	489818	501354	493573	57.7423	56.8461	57.2942
bamC	90111442	3471	b2477	2595853	2596887	-	344	COG3317M	P	lipoprotein required for OM biogenesis, in BamABCDE complex	15	15	8485156	9383060	8670287	8773868	998.581	1010.51	1004.55
gcvR	90111443	3472	b2479	2597928	2598500	+	190	COG2716E	P	DNA-binding transcriptional repressor, regulatory protein accessory to GcvA	3	3	389306	525811	391118	584832	45.0461	67.3567	56.2014
upp	90111448	1383889	b2498	2618268	2618894	-	208	COG0035F	P	uracil phosphoribosyltransferase	9	9	34573800	39705756	26574160	29425518	3060.62	3389.02	3224.82
der	90111450	3480	b2511	2633906	2635378	-	490	COG1160R	P	GTPase; multicopy suppressor of ftsJ	17	17	9180144	8297512	9104912	8275740	1048.64	953.14	1000.89
sseA	90111451	1383890	b2521	2650516	2651361	+	281	COG2897P	P	3-mercaptopyruvate sulfurtransferase	7	6	1.77477e+06	1.54951e+06	1.45337e+06	1.47304e+06	167.389	169.654	168.521
sseB	90111452	1383891	b2522	2652179	2652955	-	258	-	P	rhodanase-like enzyme, sulfur transfer from thiosulfate	1	1	332489	608190
pepB	90111453	1383892	b2523	2653097	2654380	-	427	COG0260E	P	aminopeptidase B	15	15	8321748	9363533	8.34816e+06	9526581	961.482	1097.2	1029.34
glrK	90111458	1383895	b2556	2687693	2689120	-	475	COG0642T	P	Sensor protein kinase regulating glmY sRNA in two-component system with response regulator GlrR	3	2	128171	79388.2	156516	126159	18.0264	14.53	16.2782
pgpC	90111459	3488	b2560	2695937	2696572	-	211	COG0560E	P	conserved protein	2	2	375189	372607	314211	286126	36.1885	32.9539	34.5712
trmN	90111461	1383896	b2575	2710049	2710786	-	245	COG4123R	P	tRNA (adenine-N(6)-)-methyltransferase	1	1	134723	137535
pssA	90111464	3494	b2585	2720749	2722104	+	451	COG1502I	P	phosphatidylserine synthase (CDP-diacylglycerol-serine O-phosphatidyltransferase)	15	15	3042834	2.53167e+06	3.13205e+06	2.59396e+06	360.727	298.754	329.74
rimM	90111466	3499	b2608	2743392	2743940	-	182	COG0806J	P	16S rRNA processing protein	5	5	2.0502e+06	2.14591e+06	2.05304e+06	2140163	236.455	246.489	241.472
bamE	90111468	1383899	b2617	2751627	2751968	+	113	COG2913J	P	lipoprotein component of BamABCDE OM biogenesis complex	2	2	3.5861e+06	4.05726e+06	3.41858e+06	4017395	393.727	462.695	428.211
ratB	90111469	3501	b2618	2752030	2752320	-	96	COG2914S	P	conserved protein, UPF0125 family	1	1	32043	31992.8
srlQ	90111480	3518	b2708	2827835	2828800	+	321	COG0794M	P	D-arabinose 5-phosphate isomerase	3	3	1.08456e+06	951523	1.03753e+06	889127	119.496	102.403	110.949
ygdI	90111491	1383903	b2809	2940940	2941167	-	75	-	P	novel lipoprotein	1	1	1.54924e+06	1334484
amiC	90111492	1383904	b2817	2945779	2947032	-	417	COG0860M	P	N-acetylmuramoyl-L-alanine amidase	1	1	166708	83678.8
yqeF	90111494	1383905	b2844	2982433	2983614	-	393	COG0183I	P	predicted acyltransferase	4	4	251284	326752	222038	265093	25.5727	30.5315	28.0521
ygeR	90111503	1383908	b2865	2997158	2997913	-	251	COG0739M	P	novel lipoprotein, function unknown	1	1	482011	502764
loiP	90111514	1383910	b2936	3079935	3080693	+	252	COG0501O	P	heat shock protein binding to Era protein; predicted peptidase	5	5	725924	782542	565952	609398	65.1823	70.1861	67.6842
rsmE	90111515	3568	b2946	3089156	3089887	+	243	COG1385S	P	16S rRNA m(3)U1498 methyltransferase, SAM-dependent	4	4	2.15099e+06	2.43402e+06	1542971	2.23815e+06	177.708	257.774	217.741
yqgE	90111516	3569	b2948	3090959	3091522	+	187	COG1678K	P	predicted protein	4	4	1.19373e+06	1.15875e+06	1.55813e+06	1.4224e+06	179.454	163.822	171.638
yggL	90111519	3571	b2959	3099829	3100155	-	108	COG3171S	P	conserved protein, DUF469 family	3	3	5.05949e+06	2.03153e+06	5113316	2.50459e+06	588.915	288.461	438.688
mltC	90111520	3572	b2963	3102455	3103534	+	359	COG0741M	P	membrane-bound lytic murein transglycosylase C	3	3	627948	512919	1.9237e+06	2868441	221.557	330.366	275.962
speC	90111522	1383913	b2965	3105042	3107177	-	711	COG1982E	P	ornithine decarboxylase, constitutive	8	8	1.84238e+06	1.44123e+06	1.58227e+06	1.44319e+06	182.235	166.217	174.226
yghU	90111524	1383914	b2989	3136749	3137615	+	288	COG0625O	P	predicted S-transferase	12	11	6.29082e+06	5.3756e+06	6295914	5.05835e+06	725.118	582.584	653.851
yqhC	90111526	1383915	b3010	3152284	3153240	-	318	COG2207K	P	transcriptional activator of yqhD	2	2	671613	478081	746170	548968	85.9385	63.2262	74.5823
dkga	90111527	3578	b3012	3154645	3155472	+	275	COG0656R	P	2,5-diketo-D-gluconate reductase A	11	11	6.28071e+06	4738535	5.43364e+06	4094067	625.807	471.525	548.666
tolC	90111528	1383916	b3035	3176137	3177618	+	493	COG1538MU	P	transport channel	21	21	13499196	11600052	7.38248e+06	6.72386e+06	850.261	774.406	812.333
yqiC	90111530	1383917	b3042	3182862	3183152	+	96	COG2960S	P	conserved protein	4	4	1.24931e+06	1.6024e+06	1.42545e+06	1.56849e+06	164.173	180.648	172.41
rlmG	90111535	1383919	b3084	3232761	3233897	-	378	COG2813J	P	23S rRNA mG1835 methyltransferase, SAM-dependent	6	6	1692234	1.92514e+06	1.69057e+06	1856717	194.708	213.843	204.276
exuR	90111537	1383920	b3094	3244674	3245450	+	258	COG2186K	P	DNA-binding transcriptional repressor	4	4	284328	427272	747392	914039	86.0792	105.272	95.6758
yqjC	90111538	3599	b3097	3246991	3247359	+	122	-	P	conserved protein	1	1	25400.3	39040.3
yhbO	90111548	1383923	b3153	3296996	3297514	+	172	COG0693R	P	stress-resistance protein	2	2	123868	105252	69375.2	96922.6	7.99014	11.1628	9.57649
deaD	90111550	3613	b3162	3303993	3305882	-	629	COG0513LKJ	P	ATP-dependent RNA helicase	18	18	6.22159e+06	7.4157e+06	6.1977e+06	7333810	713.807	844.656	779.231
folP	90111553	3616	b3177	3322085	3322933	-	282	COG0294H	P	7,8-dihydropteroate synthase	6	6	3.31759e+06	3.53187e+06	3765440	4.07905e+06	433.676	469.795	451.736
greA	90111554	1383925	b3181	3326261	3326737	-	158	COG0782K	P	transcript cleavage factor	11	11	6.33693e+06	6.2141e+06	6.36337e+06	6.19416e+06	732.887	713.399	723.143
ibaG	90111555	3619	b3190	3334571	3334825	-	84	COG5007K	P	predicted DNA-binding transcriptional regulator, BolA family	2	2	1.73733e+06	2564375	1.3973e+06	2.01617e+06	160.931	232.208	196.569
mlaB	90111556	3620	b3191	3334985	3335278	-	97	COG3113R	C	ABC transporter maintaining OM lipid asymmetry, cytoplasmic STAS component	2	2	813640	586892	474219	185811	54.6171	21.4003	38.0087
elbB	90111557	3623	b3209	3347828	3348481	-	217	COG3155Q	P	isoprenoid biosynthesis protein with amidotransferase-like domain	7	7	7451270	5.90954e+06	7515202	5.96407e+06	865.547	686.899	776.223
nanK	90111558	3627	b3222	3367497	3368372	-	291	COG1940KG	P	N-acetylmannosamine kinase	1	1	28783.8	65382.4
yhcB	90111560	1383926	b3233	3378213	3378611	+	132	COG3105S	P	conserved protein	7	6	16614749	15432467	13462977	12207603	1550.57	1405.98	1478.28
yhcN	90111561	1383927	b3238	3383560	3383823	+	87	-	P	conserved protein	1	1	60556	830266
rng	90111563	3632	b3247	3394348	3395817	-	489	COG1530J	P	ribonuclease G	11	11	1.40492e+06	1.32913e+06	1377462	1.40166e+06	158.646	161.434	160.04
mreB	90111564	3632	b3251	3398066	3399109	-	347	COG1077D	P	cell wall structural complex MreBCD, actin-like component MreB	12	12	27930350	24011414	26767252	27709040	3082.86	3191.33	3137.09
yrdA	90111568	1383929	b3279	3427258	3427812	+	184	COG0663R	P	conserved protein	8	8	2.06622e+06	2419407	1773179	2060054	204.222	237.262	220.742
yheO	90111573	3647	b3346	3473740	3474462	-	240	COG2964S	P	conserved protein	2	2	2.98821e+06	2.30237e+06	1.97648e+06	1.80575e+06	227.636	207.973	217.805
aroK	90111581	3656	b3390	3516565	3517086	-	173	COG0703E	P	shikimate kinase I	10	10	10566215	7.45914e+06	8.10979e+06	6.42547e+06	934.028	740.04	837.034
yrfG	90111585	3658	b3399	3526691	3527359	+	222	COG1011R	P	GMP/IMP nucleotidase	1	1	110549	194889
hslO	90111586	3658	b3401	3527796	3528674	+	292	COG1281O	P	heat shock protein Hsp33	7	7	5.21844e+06	4771685	5613381	4.80837e+06	646.509	553.794	600.151
greB	90111587	1383930	b3406	3534834	3535310	+	158	COG0782K	P	transcript cleavage factor	3	3	507432	357454	514581	345195	59.2657	39.7571	49.5114
yhgF	90111588	1383931	b3407	3535407	3537728	+	773	COG2183K	P	predicted transcriptional accessory protein	21	20	3.15108e+06	3.51773e+06	5.11427e+06	3900310	589.024	449.21	519.117
gntK	90111591	3666	b3437	3575088	3575615	-	175	COG3265G	P	gluconate kinase 2	2	2	91647.3	30749.9	424868	546546	48.9333	62.9472	55.9403
livF	90111594	3669	b3454	3590747	3591460	-	237	COG0410E	C	leucine/isoleucine/valine transporter subunit	6	6	4541158	4.87304e+06	4.37851e+06	4.62289e+06	504.285	532.431	518.358
dcrB	90111595	3673	b3472	3607978	3608535	+	185	-	P	periplasmic protein, predicted lipoprotein	10	10	7.09178e+06	7.2083e+06	7666460	7321230	882.968	843.207	863.087
yhjH	90111605	3683	b3525	3676443	3677210	-	255	COG2200T	P	cyclic-di-GMP phosphodiesterase, FlhDC-regulated	3	3	506752	551953	3905343	3.55448e+06	449.789	409.379	429.584
kdgK	90111606	1383934	b3526	3677442	3678371	+	309	COG0524G	P	ketodeoxygluconokinase	4	4	656356	869174	988896	1.39012e+06	113.894	160.104	136.999
eptB	90111611	1383935	b3546	3706807	3708498	-	563	COG2194R	P	KDO phosphoethanolamine transferase, Ca(2+)-inducible	3	3	66055	168308	123099	194390	14.1776	22.3885	18.2831
ghrB	90111614	3688	b3553	3715333	3716307	+	324	COG1052CHR	P	glyoxylate/hydroxypyruvate reductase B	10	10	22614040	20905842	12881030	11661957	1483.54	1343.14	1413.34
yiaF	90111615	1383937	b3554	3716357	3717067	-	236	-	P	conserved protein	7	7	9292860	6191609	8998684	6.09709e+06	1036.4	702.219	869.311
yibQ	90111621	3702	b3614	3786124	3787083	+	319	COG2861S	P	predicted polysaccharide deacetylase	1	1	226470	198013
dfp	90111624	3709	b3639	3810754	3811974	+	406	COG0452H	P	fused 4'-phosphopantothenoylcysteine decarboxylase/phosphopantothenoylcysteine synthetase, FMN-binding	8	8	1.1143e+06	1.12609e+06	1.59097e+06	1.53578e+06	183.236	176.88	180.058
yicN	90111630	3712	b3663	3839973	3840425	-	150	-	P	conserved protein	2	2	188941	516650	1.02733e+06	607542	118.32	69.9723	94.1461
ibpB	90111637	3717	b3686	3864492	3864920	-	142	COG0071O	P	heat shock chaperone	3	3	386789	115801	342295	100721	39.4231	11.6003	25.5117
yidQ	90111638	1383948	b3688	3865751	3866083	+	110	COG5645R	P	conserved outer membrane protein	3	3	553298	506356	474741	440690	54.6772	50.7555	52.7164
yidB	90111642	1383951	b3698	3875090	3875488	-	132	COG3753S	P	conserved protein, DUF937 family	1	1	197006
tnaA	90111643	1383952	b3708	3886753	3888168	+	471	COG3033E	P	tryptophanase/L-cysteine desulfhydrase, PLP-dependent	7	7	2.44822e+06	2.33157e+06	2454116	2.32048e+06	282.647	267.256	274.952
ravA	90111646	3730	b3746	3927620	3929116	-	498	COG0714R	P	fused predicted transcriptional regulator: sigma54 activator protein/conserved protein	4	4	792371	567104	994831	459258	114.577	52.894	83.7357
rbsD	90111647	3731	b3748	3931374	3931793	+	139	COG1869G	C	predicted cytoplasmic sugar-binding protein	1	1	239729	235066
wzzE	90111649	3736	b3785	3967054	3968100	+	348	COG3765M	P	Entobacterial Common Antigen (ECA) polysaccharide chain length modulation protein	7	7	1.21132e+06	957561	1.22339e+06	959189	140.901	110.472	125.687
dapF	90111650	3738	b3809	3992785	3993609	+	274	COG0253E	P	diaminopimelate epimerase	2	2	1.11048e+06	1.44989e+06	108729	251811	12.5226	29.0018	20.7622
yigI	90111652	3739	b3820	4002253	4002720	-	155	COG2050Q	P	conserved protein, 4HBT family of thioesterases	2	2	1250284	1.36014e+06	1.21478e+06	3132006	139.91	360.722	250.316
tatA	90111653	3743	b3836	4019968	4020237	+	89	COG1826U	C	TatABCE protein translocation system subunit	5	5	4.52058e+06	3.36444e+06	4.56197e+06	3.30781e+06	525.414	380.969	453.192
hemN	90111657	1383955	b3867	4050068	4051441	+	457	COG0635H	P	coproporphyrinogen III oxidase, SAM and NAD(P)H dependent, oxygen-independent	3	3	519373	483441	546574	491726	62.9504	56.6335	59.792
yihW	90111660	1383957	b3884	4072692	4073477	+	261	COG1349KG	P	predicted DNA-binding transcriptional regulator	2	2	421609	440172	754715	632968	86.9226	72.9007	79.9116
yihX	90111661	3753	b3885	4073576	4074175	+	199	COG1011R	P	alpha-D-Glucose-1-P phosphatase, anomer-specific	3	3	2036439	1.93823e+06	2.08776e+06	2.2084e+06	240.453	254.347	247.4
yiiM	90111666	1383960	b3910	4100845	4101519	+	224	COG2258S	P	6-N-hydroxylaminopurine resistance protein	2	2	1.29028e+06	1.58675e+06	1.66312e+06	1774161	191.547	204.335	197.941
gldA	90111668	3765	b3945	4135955	4137058	-	367	COG0371C	P	glycerol dehydrogenase, NAD	2	2	565072	668296	393319	338834	45.2997	39.0245	42.1621
sthA	90111670	1383961	b3962	4157413	4158813	-	466	COG1249C	P	pyridine nucleotide transhydrogenase, soluble	14	13	2.75155e+06	3.2923e+06	3.49586e+06	3.86316e+06	402.628	444.93	423.779
murI	90111671	3769	b3967	4163451	4164308	+	285	COG0796M	P	glutamate racemase	3	3	600296	565778	618139	551598	71.1928	63.5291	67.3609
thiF	90111672	3774	b3992	4190844	4191599	-	251	COG0476H	P	adenylyltransferase, modifies ThiS C-terminus	7	7	2.41288e+06	2.09389e+06	2.39911e+06	2104078	276.313	242.333	259.323
nfi	90111673	3775	b3998	4196813	4197484	+	223	COG1515L	P	endonuclease V	2	2	1.08053e+06	873542	1.05835e+06	1.05717e+06	121.894	121.757	121.825
iclR	90111675	1383963	b4018	4220827	4221651	-	274	COG1414K	P	DNA-binding transcriptional repressor	3	3	374848	326294	512770	318200	59.0572	36.648	47.8526
ubiC	90111677	3783	b4039	4250529	4251026	+	165	COG3161H	P	chorismate--pyruvate lyase	2	2	332582	112152	207319	214161	23.8776	24.6656	24.2716
plsB	90111678	1383964	b4041	4252066	4254489	-	807	COG2937I	P	glycerol-3-phosphate O-acyltransferase	19	19	4.08607e+06	6299372	2.70618e+06	2.60769e+06	311.678	300.335	306.006
zur	90111679	1383965	b4046	4257511	4258026	-	171	COG0735P	P	DNA-binding transcriptional repressor, Zn(II)-binding	4	4	967312	912444	858855	816185	98.9167	94.0023	96.4595
alsR	90111685	3792	b4089	4310124	4311014	-	296	COG1737K	P	DNA-binding transcriptional repressor	3	3	206546	178995	200302	197543	23.0693	22.7516	22.9105
yjcZ	90111687	3795	b4110	4327383	4328261	+	292	-	P	mutational suppressor of yhjH motility mutation, function unknown	6	6	2.22165e+06	1.97587e+06	3154540	2924251	363.317	336.794	350.056
yjdC	90111689	3802	b4135	4360756	4361331	-	191	COG1309K	P	predicted transcriptional regulator	7	7	2.25703e+06	1.89432e+06	2.52158e+06	1.97357e+06	290.418	227.302	258.86
ASPA	90111690	1383969	b4139	4364914	4366350	-	478	COG1027E	P	aspartate ammonia-lyase	4	4	390240	444460	482541	562893	55.5756	64.8299	60.2028
fxsA	90111691	1383970	b4140	4366687	4367163	+	158	COG3030R	P	suppressor of F exclusion of phage T7	1	1	386090	262978
yjeI	90111692	1383971	b4144	4370832	4371185	+	117	-	P	conserved protein	2	2	2314783	2.60493e+06	1.91631e+06	2.02019e+06	220.707	232.671	226.689
rsgA	90111696	1383974	b4161	4388480	4389532	-	350	COG1162R	P	ribosome small subunit-dependent GTPase A	6	6	1.34136e+06	1.23431e+06	977221	923448	112.549	106.356	109.453
orn	90111697	1383975	b4162	4389627	4390172	+	181	COG1949A	P	oligoribonuclease	5	5	2.2854e+06	2220823	1.62673e+06	1.72435e+06	187.355	198.598	192.977
rnr	90111698	3809	b4179	4404677	4407118	+	813	COG0557K	P	exoribonuclease R, RNase R	24	24	5108195	5023540	3.61945e+06	3728397	416.862	429.41	423.136
bsmA	90111701	1383977	b4189	4414464	4414793	-	109	-	P	confers peroxide resistance in bioflms	1	1	6638.46	7013.48
fklB	90111705	1383979	b4207	4426958	4427578	+	206	COG0545O	P	FKBP-type peptidyl-prolyl cis-trans isomerase (rotamase)	7	7	24453098	26173462	25104228	26936132	2891.32	3102.31	2996.82
ytfH	90111706	1383980	b4212	4432136	4432516	+	126	COG1733K	P	predicted transcriptional regulator, HxlR-type, DUF24 family	1	1	68619.3	85305
RIDA	90111711	1383982	b4243	4468550	4468936	-	128	COG0251J	P	conserved protein, UPF0131 family	7	7	32573178	34499096	21058176	22791440	2425.33	2624.95	2525.14
bdcR	90111712	1383983	b4251	4472147	4472740	+	197	COG1309K	P	predicted transcriptional regulator	2	2	95277.8	181443	86890.1	182534	10.0074	21.023	15.5152
tabA	90111713	1383984	b4252	4472885	4473337	+	150	COG2731G	P	biofilm modulator regulated by toxins	9	9	14651910	13785569	15476194	15279292	1782.44	1759.76	1771.1
lptG	90111715	3820	b4262	4485341	4486423	+	360	COG0795R	C	lipopolysaccharide export ABC permease of the LptBFGC export complex	4	4	772033	594370	394413	337803	45.4256	38.9057	42.1657
AHR	90111716	1383986	b4269	4493213	4494232	-	339	COG1064R	P	predicted alcohol dehydrogenase, Zn-dependent and NAD(P)-binding	5	6	1.03837e+06	981512	1108587	1172552	127.679	135.046	131.363
yjhC	90111719	3823	b4280	4503310	4504428	+	372	COG0673R	P	predicted oxidoreductase	1	1	454712	196493
yjhU	90111724	1383987	b4295	4517361	4518347	-	328	COG2390K	P	predicted DNA-binding transcriptional regulator; KpLE2 phage-like element	2	2	542605	475852	758397	879745	87.3467	101.323	94.3347
mcrB	90111737	3837	b4346	4575981	4577360	-	459	COG1401V	C	5-methylcytosine-specific restriction enzyme McrBC, subunit McrB	1	1	452408	484902
yjiA	90111738	3839	b4352	4585932	4586888	-	318	COG0523R	P	predicted GTPase	2	2	892073	778674	638980	563196	73.5931	64.8649	69.229
yjiY	90111739	3839	b4354	4587152	4589302	-	716	COG1966T	P	predicted inner membrane protein	3	3	1.63836e+06	851346	1.01054e+06	1319263	116.387	151.943	134.165
opgb	90111741	1383990	b4359	4595173	4597464	-	763	COG1368M	P	phosphoglycerol transferases I and II	8	8	2.25464e+06	2.51883e+06	996586	991039	114.78	114.141	114.46
yjjA	90111742	3840	b4360	4597718	4598212	-	164	-	P	conserved protein	2	2	1189853	1.12963e+06	591352	697548	68.1077	80.3386	74.2231
nadR	90111746	3847	b4390	4625338	4626570	+	410	COG3172H	P	bifunctional DNA-binding transcriptional repressor/ NMN adenylyltransferase	8	8	2.37812e+06	2.07716e+06	2.37514e+06	2061132	273.551	237.386	255.469
slt	90111747	1383991	b4392	4628756	4630693	+	645	COG0741M	P	lytic murein transglycosylase, soluble	11	11	1.15059e+06	979381	1.14272e+06	889106	131.61	102.401	117.006
yecJ	94541093	1383994	b4537	1985531	1985782	-	83	-	P	predicted protein	3	3	608748	573410	1.1447e+06	978280	131.839	112.671	122.255
yobH	94541114	1383999	b4536	1906949	1907188	+	79	-	P	predicted protein	1	1	877449	767259
yibT	94541127	1384005	b4554	3774194	3774403	-	69	-	P	predicted protein	2	2	665283	529687	870971	537219	100.312	61.873	81.0926
yifL	94541130	3738	b4558	3992545	3992748	+	67	COG5567N	P	predicted lipoprotein	2	2	1.0497e+06	1.02737e+06	654166	724689	75.3421	83.4645	79.4033
ykgO	94541137	3061	b4506	311598	311738	-	46	COG0257J	P	rpmJ (L36) paralog	2	2	1.08466e+06	973534	959783	831027	110.541	95.7117	103.126

## Sheet: MG1655
Symbols	GI	OperonID	Synonym	Start	End	Strand	Length	COG_number	Complex/Pathway	Product	peptides number identified with relex criteria	peptides number identified with stringent criteria	MG1655_1 abundance with relex criteria	MG1655_2 abundance with relex criteria	MG1655_1 protein abundance with stringent criteria	MG1655_2 protein abundance with stringent criteria	MG1655_1 protein copy number with stringent criteria	MG1655_2 protein copy number with stringent criteria	Average protein copy number per cell
ybeZ	145698230	3133	b0660	691561	692601	-	346	COG1702T	P	predicted protein with nucleoside triphosphate hydrolase domain	6	6	3.77825e+06	3.50586e+06	3.79752e+06	3.50454e+06	768.208	708.942	738.575
gsiA	145698235	3167	b0829	866743	868614	+	623	COG1123R	P	glutathione transporter ATP-binding protein, ABC superfamily	2	2	2.81627e+06	2.10162e+06	2.8182e+06	1.9927e+06	570.1	403.107	486.603
lolA	145698236	3180	b0891	936595	937206	+	203	COG2834M	P	chaperone for lipoproteins	6	6	1.8922e+06	1.73485e+06	1.89544e+06	1.73397e+06	383.432	350.77	367.101
pqiC	145698237	3191	b0952	1014119	1014682	+	187	COG3009S	P	conserved protein	2	2	127807	141414	127906	139004	25.8745	28.1194	26.9969
rlmI	145698239	3194	b0967	1028002	1029192	-	396	COG1092R	P	23S rRNA m(5)C1962 methyltransferase, SAM-dependent	8	8	1.62662e+06	1.34856e+06	1.62322e+06	1.35463e+06	328.364	274.031	301.198
hrpA	145698255	1382493	b1413	1481085	1484987	+	1300	COG1643L	P	predicted ATP-dependent helicase	7	7	461316	511158	458278	548911	92.7062	111.04	101.873
opgD	145698256	1382494	b1424	1494880	1496535	+	551	COG3131P	P	osmoregulated periplasmic glucan (OPG) biosynthesis periplasmic protein	8	8	754555	754748	761788	753852	154.104	152.498	153.301
rstA	145698268	3303	b1608	1680183	1680902	+	239	COG0745TK	P	multicopy supressor of yjeE, yeaZ or ygjD deletion lethality, predicted response regulator of two-component regulatory system with sensor protein RstB	2	2	1.89505e+06	1.53472e+06	1.89077e+06	1.53022e+06	382.488	309.552	346.02
yebF	145698278	3346	b1847	1928058	1928414	-	118	-	P	secreted protein	2	2	690252	675603	693931	674513	140.377	136.449	138.413
yeeX	145698283	1382503	b2007	2077056	2077385	-	109	COG2926S	P	conserved protein, UPF0265 family	4	4	11868589	9462501	11916103	9481245	2410.54	1917.98	2164.26
rcsC	145698285	1382505	b2218	2315049	2317898	-	949	COG0642T	P	hybrid sensory kinase in two-component regulatory system with RcsB and YojN	4	4	1.10124e+06	1.01916e+06	621848	844829	125.795	170.902	148.349
nuoN	145698289	3427	b2276	2388070	2389527	-	485	COG1007C	C	NADH:ubiquinone oxidoreductase, membrane subunit N	1	1	2346385	2157039
nuoG	145698290	3428	b2283	2395461	2398187	-	908	COG1034C	C	NADH:ubiquinone oxidoreductase, chain G	20	20	6.81473e+06	6319602	6804580	6322973	1376.51	1279.09	1327.8
nuoC	145698291	3428	b2286	2400077	2401867	-	596	COG0649C	C	NADH:ubiquinone oxidoreductase, fused CD subunit	19	19	5150491	5518153	5144756	5.48934e+06	1040.74	1110.45	1075.6
fadL	145698292	1382506	b2344	2459328	2460668	+	446	COG2067I	P	long-chain fatty acid outer membrane transporter	2	2	340092	268395	339646	268135	68.7077	54.2416	61.4747
yffS	145698298	1382508	b2450	2562545	2563354	+	269	-	P	CPZ-55 prophage; predicted protein	2	2	1814752	2603880	1.85683e+06	2.68071e+06	375.622	542.288	458.955
ygiB	145698308	3586	b3037	3177766	3178437	+	223	COG5463S	P	conserved protein, UPF0441 family	1	1	355275	228659
ygjR	145698311	3596	b3087	3235333	3236319	+	328	COG0673R	P	predicted NAD(P)-binding dehydrogenase	3	3	264003	235326	254819	231739	51.5479	46.879	49.2134
PNP	145698316	1382512	b3164	3307055	3309190	-	711	COG1185J	C	polynucleotide phosphorylase/polyadenylase	23	23	14822792	15342915	14797833	15337283	2993.49	3102.62	3048.05
bisC	145698325	1382515	b3551	3712084	3714417	-	777	COG0243C	P	biotin sulfoxide reductase	3	3	826245	742856	585894	911243	118.522	184.338	151.43
yihA	145698334	1382519	b3865	4048156	4048788	-	210	COG0218R	P	GTP-binding protein required for normal cell division	5	5	2.71141e+06	2.93974e+06	2.71478e+06	2.94413e+06	549.179	595.575	572.377
argB	145698337	3767	b3959	4154036	4154812	+	258	COG0548E	P	acetylglutamate kinase	9	9	5.482e+06	5.70745e+06	5476285	5695921	1107.81	1152.24	1130.03
fabR	145698338	3768	b3963	4159147	4159794	+	215	COG1309K	P	DNA-binding transcriptional repressor	3	3	827821	934625	826186	933748	167.131	188.89	178.011
THRA	16127996	2996	b0002	337	2799	+	820	COG0527E	P	fused aspartokinase I and homoserine dehydrogenase I	27	27	18145586	19667274	18134316	19690334	3668.43	3983.2	3825.82
THRB	16127997	2996	b0003	2801	3733	+	310	COG0083E	P	homoserine kinase	4	4	8749440	7.72446e+06	8733746	7.74138e+06	1766.77	1566.02	1666.4
thrC	16127998	2996	b0004	3734	5020	+	428	COG0498E	P	threonine synthase	13	13	19965348	19809246	19932850	19794446	4032.26	4004.27	4018.26
yaaA	16128000	2997	b0006	5683	6459	-	258	COG3022S	P	Peroxide resistance protein, lowers intracellular iron	4	4	1.16017e+06	1.33142e+06	1.19116e+06	1.32901e+06	240.962	268.848	254.905
talB	16128002	2998	b0008	8238	9191	+	317	COG0176G	P	transaldolase B	18	17	26225350	28023804	26163834	28109460	5292.74	5686.33	5489.54
dnaK	16128008	3000	b0014	12163	14079	+	638	COG0443O	C	chaperone Hsp70, co-chaperone with DnaJ	35	35	35899416	26355936	35928724	26457246	7268.11	5352.1	6310.1
DNAJ	16128009	3000	b0015	14168	15298	+	376	COG0484O	C	chaperone Hsp40, co-chaperone with DnaK	8	8	3.25025e+06	3245984	3.25576e+06	3.23848e+06	658.615	655.12	656.867
nhaA	16128013	3002	b0019	17489	18655	+	388	COG3004P	P	sodium-proton antiporter	1	1	1.39205e+06	1.41759e+06
rpsT	16128017	1382532	b0023	20815	21078	-	87	COG0268J	P	30S ribosomal subunit protein S20	4	4	52865200	58737692	53208744	59131016	10763.7	11961.8	11362.7
RIBF	16128019	3004	b0025	21407	22348	+	313	COG0196H	P	bifunctional riboflavin kinase/FAD synthetase	3	3	872731	775624	869069	775104	175.806	156.798	166.302
ileS	16128020	3004	b0026	22391	25207	+	938	COG0060J	P	isoleucyl-tRNA synthetase	31	31	12747209	13601353	12721903	13635643	2573.54	2758.39	2665.97
ispH	16128023	3005	b0029	26277	27227	+	316	COG0761IM	P	4-hydroxy-3-methylbut-2-enyl diphosphate reductase, 4Fe-4S protein	4	4	926372	974424	942680	998003	190.697	201.888	196.293
rihC	16128024	3005	b0030	27293	28207	+	304	COG1957F	P	ribonucleoside hydrolase 3	1	1	149358	280717
dapB	16128025	1382533	b0031	28374	29195	+	273	COG0289E	P	dihydrodipicolinate reductase	8	8	2.43306e+06	2590237	2426156	2589942	490.793	523.925	507.359
carA	16128026	3006	b0032	29651	30799	+	382	COG0505EF	C	carbamoyl phosphate synthetase small subunit, glutamine amidotransferase	11	11	15276133	14982979	15251140	14926434	3085.19	3019.5	3052.35
carB	16128027	3006	b0033	30817	34038	+	1073	COG0458EF	C	carbamoyl-phosphate synthase large subunit	35	34	23438242	20696794	23393764	20756462	4732.38	4198.87	4465.63
folA	16128042	1382534	b0048	49823	50302	+	159	COG0262H	P	dihydrofolate reductase	2	2	519238	803591	518318	803566	104.852	162.555	133.704
apaH	16128043	3012	b0049	50380	51222	-	280	COG0639T	P	diadenosine tetraphosphatase	1	1	264280	205924
rsmA	16128045	3012	b0051	51609	52430	-	273	COG0030J	P	16S rRNA dimethyladenosine transferase, SAM-dependent	3	3	697106	753372	693963	754298	140.384	152.589	146.486
surA	16128047	3012	b0053	53416	54702	-	428	COG0760O	P	peptidyl-prolyl cis-trans isomerase (PPIase)	14	14	6.07519e+06	6146398	6074766	6157302	1228.88	1245.58	1237.23
lptD	16128048	3012	b0054	54755	57109	-	784	COG1452M	P	LPS assembly OM complex LptDE, beta-barrel component	16	16	1.38204e+06	1.823e+06	1384009	1.82665e+06	279.974	369.518	324.746
djlA	16128049	1382535	b0055	57364	58179	+	271	COG1076O	P	DnaJ-like protein, membrane anchored	2	2	401506	572320	411585	519141	83.2606	105.018	94.1394
rapA	16128053	3013	b0059	60358	63264	-	968	COG0553KL	P	RNA polymerase-associated helicase protein (ATPase and RNA polymerase recycling factor)	8	8	3023329	706274	3.03357e+06	698630	613.667	141.327	377.497
thiB	16128062	3016	b0068	74497	75480	-	327	COG4143H	C	thiamin transporter subunit	9	9	2.19968e+06	2.55514e+06	2.201e+06	2.55466e+06	445.246	516.788	481.017
leuD	16128065	3017	b0071	78848	79453	-	201	COG0066E	P	3-isopropylmalate dehydratase small subunit	6	6	8543360	8665274	8508886	8690453	1721.28	1758.01	1739.65
leuC	16128066	3017	b0072	79464	80864	-	466	COG0065E	P	3-isopropylmalate dehydratase large subunit	15	15	8439748	7.90573e+06	8474920	7852659	1714.41	1588.53	1651.47
leuA	16128068	3017	b0074	81958	83529	-	523	COG0119E	P	2-isopropylmalate synthase	11	11	2.32772e+06	1.96988e+06	2324063	1.96544e+06	470.14	397.593	433.866
ilvH	16128071	3018	b0078	87357	87848	+	163	COG0440E	C	acetolactate synthase III, thiamin-dependent, small subunit	8	8	4888184	4.71502e+06	4.40038e+06	4106596	890.163	830.733	860.448
cra	16128073	1382540	b0080	88028	89032	+	334	COG1609K	P	DNA-binding transcriptional repressor-activator for carbon metabolism	2	2	1.64772e+06	1.75623e+06	1.64763e+06	1.75986e+06	333.302	356.007	344.655
rsmH	16128075	3019	b0082	90094	91035	+	313	COG0275M	P	16S rRNA m(4)C1402 methyltranserfase, SAM-dependent	4	4	1346627	1.18564e+06	1.34468e+06	1.18519e+06	272.018	239.756	255.887
ftsL	16128076	3019	b0083	91032	91397	+	121	COG3116D	P	membrane bound cell division protein at septum containing leucine zipper motif	1	1	99932.8	68585.9
ftsI	16128077	3019	b0084	91413	93179	+	588	COG0768M	P	transpeptidase involved in septal peptidoglycan synthesis (penicillin-binding protein 3)	3	3	211329	219595	226328	220303	45.7845	44.5656	45.1751
murE	16128078	3019	b0085	93166	94653	+	495	COG0769M	P	UDP-N-acetylmuramoyl-L-alanyl-D-glutamate:meso-diaminopimelate ligase	4	4	627051	680192	627325	678727	126.903	137.301	132.102
murF	16128079	3019	b0086	94650	96008	+	452	COG0770M	P	UDP-N-acetylmuramoyl-tripeptide:D-alanyl-D-alanine ligase	2	2	448231	474334	424787	450226	85.9311	91.0773	88.5042
murD	16128081	3019	b0088	97087	98403	+	438	COG0771M	P	UDP-N-acetylmuramoyl-L-alanine:D-glutamate ligase	3	3	743830	833689	745006	867089	150.709	175.406	163.057
murG	16128083	3019	b0090	99644	100711	+	355	COG0707M	P	N-acetylglucosaminyl transferase	5	4	808676	967686	811724	966521	164.206	195.52	179.863
MURC	16128084	3019	b0091	100765	102240	+	491	COG0773M	P	UDP-N-acetylmuramate:L-alanine ligase	5	5	1.23702e+06	1.69043e+06	1.23324e+06	1692744	249.474	342.429	295.952
ddlB	16128085	3019	b0092	102233	103153	+	306	COG1181M	P	D-alanine:D-alanine ligase	6	6	1.09826e+06	1.15531e+06	1.0958e+06	1.15479e+06	221.673	233.606	227.639
ftsQ	16128086	3019	b0093	103155	103985	+	276	COG1589M	P	Divisome assembly protein, membrane anchored protein involved in growth of wall at septum	2	2	105594	438517	410264	449371	82.9932	90.9043	86.9488
ftsZ	16128088	3019	b0095	105305	106456	+	383	COG0206D	P	GTP-binding tubulin-like cell division protein	15	15	8.23509e+06	6316328	8.2051e+06	6320217	1659.83	1278.53	1469.18
lpxC	16128089	3019	b0096	106557	107474	+	305	COG0774M	P	UDP-3-O-acyl N-acetylglucosamine deacetylase	2	2	230558	299713	234839	288046	47.5062	58.2696	52.8879
secA	16128091	3020	b0098	108279	110984	+	901	COG0653U	P	preprotein translocase subunit, ATPase	22	22	2.85048e+06	2972102	2.83947e+06	2.97975e+06	574.403	602.781	588.592
zapD	16128095	3021	b0102	111856	112599	-	247	COG4582S	P	conserved protein	3	3	581186	559464	580209	562087	117.372	113.706	115.539
guac	16128097	1382542	b0104	113444	114487	+	347	COG0516F	P	GMP reductase	4	4	3.60222e+06	3679886	3.63521e+06	3709319	735.375	750.367	742.871
nadC	16128102	1382543	b0109	117752	118645	-	297	COG0157H	P	quinolinate phosphoribosyltransferase	6	6	1.0037e+06	995878	1.00212e+06	998447	202.721	201.978	202.35
ampD	16128103	3023	b0110	118733	119284	+	183	COG3023V	P	1,6-anhydro-N-acetylmuramyl-L-alanine amidase, Zn-dependent; murein amidase	1	1	277538	232795
aroP	16128105	1382544	b0112	120178	121551	-	457	COG1113E	P	aromatic amino acid transporter	2	2	4.09064e+06	2.45887e+06	4085745	2.46587e+06	826.515	498.828	662.671
pdhR	16128106	1382545	b0113	122092	122856	+	254	COG2186K	P	DNA-binding transcriptional dual regulator	2	2	1.24202e+06	1.66606e+06	1.23527e+06	1.6702e+06	249.885	337.868	293.877
aceE	16128107	3024	b0114	123017	125680	+	887	COG2609C	C	pyruvate dehydrogenase, decarboxylase component E1, thiamin-binding	40	39	78467472	80808568	78353096	80601288	15850.2	16305	16077.6
aceF	16128108	3024	b0115	125695	127587	+	630	COG0508C	C	pyruvate dehydrogenase, dihydrolipoyltransacetylase component E2	26	26	30058538	28823696	29997146	28706340	6068.19	5807.07	5937.63
lpd	16128109	1382546	b0116	127912	129336	+	474	COG1249C	P	lipoamide dehydrogenase, E3 component is part of three enzyme complexes	14	14	22071366	21007340	22057456	21018466	4462.05	4251.88	4356.97
acnB	16128111	1382548	b0118	131615	134212	+	865	COG1049C	P	bifunctional aconitate hydratase 2/2-methylisocitrate dehydratase	32	31	23757816	21242972	23821164	21285940	4818.84	4305.98	4562.41
speD	16128113	3025	b0120	134788	135582	-	264	COG1586E	P	S-adenosylmethionine decarboxylase	3	3	3.61819e+06	3.49417e+06	523800	1.49535e+06	105.961	302.498	204.23
speE	16128114	3025	b0121	135598	136464	-	288	COG0421E	P	spermidine synthase (putrescine aminopropyltransferase)	5	5	3137826	3.37429e+06	3.14144e+06	2265298	635.49	458.252	546.871
cueO	16128116	1382549	b0123	137083	138633	+	516	COG2132Q	P	multicopper oxidase (laccase)	4	4	1.9899e+06	1.78658e+06	1.99027e+06	1.77975e+06	402.617	360.03	381.324
gcd	16128117	1382550	b0124	138835	141225	-	796	COG4993G	P	glucose dehydrogenase	10	10	1.82493e+06	2259157	1.76579e+06	2.28962e+06	357.207	463.172	410.189
can	16128119	1382551	b0126	142008	142670	-	220	COG0288P	P	carbonic anhydrase	4	4	4.86854e+06	5001556	4.87773e+06	5012607	986.727	1014.01	1000.37
yadG	16128120	3026	b0127	142779	143705	+	308	COG1131V	C	predicted transporter subunit: ATP-binding component of ABC superfamily	4	4	514606	466568	515105	467762	104.202	94.6247	99.4133
panD	16128124	1382554	b0131	146314	146694	-	126	COG0853H	P	aspartate 1-decarboxylase	1	1	4675541	3.38546e+06
panC	16128126	3027	b0133	147944	148795	-	283	COG0414H	P	pantothenate synthetase	10	10	2.69514e+06	2.88078e+06	2.69534e+06	2.88419e+06	545.246	583.45	564.348
panB	16128127	3027	b0134	148807	149601	-	264	COG0413H	P	3-methyl-2-oxobutanoate hydroxymethyltransferase	4	4	10302778	9243585	10297926	9234048	2083.19	1867.98	1975.58
folK	16128135	3029	b0142	157253	157732	-	159	COG0801H	P	2-amino-4-hydroxy-6-hydroxymethyldihyropteridine pyrophosphokinase	1	1	442095	195865
dksA	16128138	3029	b0145	160149	160604	-	151	COG1734T	P	DNA-binding transcriptional regulator of rRNA transcription, DnaK suppressor protein	1	1	4.5952e+06	3.71881e+06
mrcB	16128142	1382557	b0149	164730	167264	+	844	COG0744M	P	fused glycosyl transferase and transpeptidase	4	3	1824093	1.33135e+06	525612	359486	106.327	72.7213	89.5243
fhuA	16128143	3031	b0150	167484	169727	+	747	COG1629P	P	ferrichrome outer membrane transporter	16	16	1.95493e+06	2.34946e+06	1.98495e+06	2354956	401.539	476.39	438.964
hemL	16128147	1382558	b0154	173602	174882	-	426	COG0001H	P	glutamate-1-semialdehyde aminotransferase (aminomutase)	11	11	6.99861e+06	7612728	6974130	7579313	1410.81	1533.24	1472.03
CLCA	16128148	3032	b0155	175107	176528	+	473	COG0038P	P	chloride channel, voltage-gated	1	1	111474	162592
erpA	16128149	3032	b0156	176610	176954	+	114	COG0316S	P	iron-sulfur cluster insertion protein	2	2	2782739	5257907	2.77903e+06	5252190	562.177	1062.48	812.327
mtn	16128152	3033	b0159	178455	179153	-	232	COG0775F	P	5'-methylthioadenosine/S-adenosylhomocysteine nucleosidase	2	2	3892273	2796732	3.88997e+06	2.79599e+06	786.911	565.607	676.259
degP	16128154	1382560	b0161	180884	182308	+	474	COG0265O	P	serine endoprotease (protease Do), membrane-associated	13	13	3830365	3.38795e+06	3.82768e+06	3.38404e+06	774.31	684.565	729.438
yaeH	16128156	1382561	b0163	183709	184095	-	128	-	P	conserved protein, UPF0325 family	5	5	4674912	3.96332e+06	4.68713e+06	3957580	948.17	800.588	874.379
dapD	16128159	3034	b0166	185123	185947	-	274	COG2171E	P	2,3,4,5-tetrahydropyridine-2-carboxylate N-succinyltransferase	12	12	9746370	9347432	10269337	9853832	2077.41	1993.35	2035.38
glnD	16128160	3034	b0167	185978	188650	-	890	COG2844O	P	uridylyltransferase	2	3	1.39712e+06	1.48688e+06	1.39629e+06	1.49318e+06	282.458	302.06	292.259
map	16128161	3034	b0168	188712	189506	-	264	COG0024J	P	methionine aminopeptidase	6	6	2.01161e+06	1.88175e+06	1.67291e+06	1.51551e+06	338.418	306.576	322.497
rpsB	16128162	1382562	b0169	189874	190599	+	241	COG0052J	P	30S ribosomal subunit protein S2	8	8	31847472	36556996	31719100	36513672	6416.53	7386.44	6901.48
tsf	16128163	3035	b0170	190857	191708	+	283	COG0264J	P	protein chain elongation factor EF-Ts	15	15	43169844	42073468	43271612	42061704	8753.52	8508.76	8631.14
pyrH	16128164	3035	b0171	191855	192580	+	241	COG0528F	P	uridylate kinase	5	5	3038912	4261569	3050214	4262904	617.035	862.353	739.694
frr	16128165	3036	b0172	192872	193429	+	185	COG0233J	P	ribosome recycling factor	7	7	26932610	27662198	26950650	27636614	5451.91	5590.68	5521.29
dxr	16128166	3036	b0173	193521	194717	+	398	COG0743I	P	1-deoxy-D-xylulose 5-phosphate reductoisomerase	2	2	406777	408058	396115	407522	80.1311	82.4387	81.2849
ispU	16128167	3037	b0174	194903	195664	+	253	COG0020I	C	undecaprenyl pyrophosphate synthase	1	1	1877925	1948913
rseP	16128169	3037	b0176	196546	197898	+	450	COG0750M	C	inner membrane zinc RIP metalloprotease; RpoE activator, by degrading RseA	2	1	101074	85255.1
bamA	16128170	3037	b0177	197928	200360	+	810	COG4775M	C	outer membrane protein assembly factor, forms pores; required for OM biogenesis; in BamABCDE OM protein complex	25	24	7242055	6937627	7.23221e+06	6.95133e+06	1463.02	1406.2	1434.61
skp	16128171	3038	b0178	200482	200967	+	161	COG2825M	P	periplasmic chaperone	6	6	21456374	19472456	21444996	19468172	4338.16	3938.26	4138.21
lpxD	16128172	3038	b0179	200971	201996	+	341	COG1044M	P	UDP-3-O-(3-hydroxymyristoyl)-glucosamine N-acyltransferase	2	2	2.03233e+06	2.20345e+06	2.02818e+06	2192193	410.285	443.464	426.874
fabZ	16128173	3038	b0180	202101	202556	+	151	COG0764I	P	(3R)-hydroxymyristol acyl carrier protein dehydratase	4	4	9644690	10734974	9652532	10752150	1952.63	2175.08	2063.86
lpxA	16128174	3038	b0181	202560	203348	+	262	COG1043M	P	UDP-N-acetylglucosamine acetyltransferase	4	4	2.01716e+06	2153675	2.01157e+06	2155516	406.925	436.044	421.485
accA	16128178	3038	b0185	208621	209580	+	319	COG0825I	P	acetyl-CoA carboxylase, carboxytransferase, alpha subunit	11	11	6357039	7080658	6.38068e+06	7088865	1290.76	1434.02	1362.39
tilS	16128181	3039	b0188	212331	213629	+	432	COG0037D	P	tRNA(Ile)-lysidine synthetase	1	1	133102	83571.8
nlpE	16128185	3041	b0192	215269	215979	+	236	COG3015MP	P	lipoprotein involved with copper homeostasis and adhesion	2	2	249269	296133	264037	252242	53.4126	51.0267	52.2196
pros	16128187	1382563	b0194	217057	218775	-	572	COG0442J	P	prolyl-tRNA synthetase	18	18	6.01577e+06	7.03942e+06	6.02356e+06	7.03836e+06	1218.52	1423.81	1321.16
rcsF	16128189	3042	b0196	219591	219995	-	134	-	P	predicted outer membrane protein, signal	1	1	2.62269e+06	1.42503e+06
metQ	16128190	3043	b0197	220113	220928	-	271	COG1464P	C	DL-methionine transporter subunit	12	12	11621983	12917042	11628876	12928248	2352.43	2615.29	2483.86
metI	16128191	3043	b0198	220968	221621	-	217	COG2011P	C	DL-methionine transporter subunit	2	2	870255	811132	866622	808609	175.311	163.575	169.443
metN	16128192	3043	b0199	221614	222645	-	343	COG1135P	C	DL-methionine transporter subunit	9	9	2.19125e+06	2262646	2190048	2272632	443.03	459.736	451.383
gmhB	16128193	1382564	b0200	222833	223408	+	191	COG0241E	P	D,D-heptose 1,7-bisphosphate phosphatase	1	1	291141	319184
yafD	16128196	3044	b0209	231122	231922	+	266	COG3021S	P	conserved protein	1	1	360169	372920
gloB	16128199	3045	b0212	234027	234782	-	251	COG0491R	P	hydroxyacylglutathione hydrolase	2	2	438093	496736	440149	495941	89.0387	100.325	94.6819
dnaQ	16128202	1382568	b0215	236067	236798	+	243	COG0847L	C	DNA polymerase III epsilon subunit	1	1	1.11503e+06	960571
ivy	16128206	1382571	b0220	240343	240816	+	157	-	P	inhibitor of c-type lysozyme, periplasmic	3	3	1.84486e+06	1.66539e+06	1.82825e+06	1.6554e+06	369.84	334.875	352.358
gmhA	16128208	1382572	b0222	243543	244121	+	192	COG0279G	P	D-sedoheptulose 7-phosphate isomerase	8	8	9131845	10718446	9111427	10711738	1843.17	2166.9	2005.04
yafJ	16128209	1382573	b0223	244327	245094	+	255	COG0121R	P	predicted amidotransfease	2	2	287018	312834	288105	311537	58.2815	63.0216	60.6515
dinJ	16128212	3046	b0226	246242	246502	-	86	COG3077L	P	antitoxin of YafQ-DinJ toxin-antitoxin system	3	3	643312	734090	641083	732371	129.686	148.153	138.92
PEPD	16128223	1382577	b0237	254259	255716	-	485	COG2195E	P	aminoacyl-histidine dipeptidase (peptidase D)	10	10	9475265	8.3041e+06	9450601	8321166	1911.78	1683.31	1797.55
GPT	16128224	1382578	b0238	255977	256435	+	152	COG0503F	P	guanine-hypoxanthine phosphoribosyltransferase	2	2	8.2654e+06	10366761	8257720	10359526	1670.47	2095.65	1883.06
FRSA	16128225	3048	b0239	256527	257771	+	414	COG0412Q	P	fermentation-respiration switch protein; PTS Enzyme IIA(Glc)-binding protein; pNP-butyrate esterase activity	11	10	1.70107e+06	1.99773e+06	1.69696e+06	1.97066e+06	343.282	398.649	370.966
proB	16128228	3049	b0242	259612	260715	+	367	COG0263E	P	gamma-glutamate kinase	10	10	3.19874e+06	3.49819e+06	3.3416e+06	3.62692e+06	675.98	733.698	704.839
proA	16128229	3049	b0243	260727	261980	+	417	COG0014E	P	gamma-glutamylphosphate reductase	11	11	2902606	3.47708e+06	2.90878e+06	3.47727e+06	588.425	703.424	645.924
mmuM	16128246	3053	b0261	275939	276871	+	310	COG2040E	P	CP4-6 prophage; S-methylmethionine:homocysteine methyltransferase	1	1	198552	264392
argF	16128258	1382586	b0273	288525	289529	-	334	COG0078E	P	ornithine carbamoyltransferase 2, chain F; CP4-6 prophage	2	2	16572506	14290128	16644101	14229328	3366.97	2878.48	3122.73
yagU	16128272	1382590	b0287	302215	302829	+	204	COG3477S	P	inner membrane protein, DUF1440 family	4	4	6.64575e+06	7771080	6.67851e+06	7760935	1351.01	1569.98	1460.49
betB	16128297	3065	b0312	326485	327957	-	490	COG1012C	P	betaine aldehyde dehydrogenase, NAD-dependent	4	4	311828	393461	313261	392266	63.3702	79.3524	71.3613
yahK	16128310	1382599	b0325	342108	343157	+	349	COG1064R	P	predicted oxidoreductase, Zn-dependent and NAD(P)-binding	5	5	341013	300928	341862	301035	69.1561	60.897	65.0266
codB	16128321	3069	b0336	354146	355405	+	419	COG1457F	P	cytosine transporter	2	2	304608	227035	303576	227517	61.4112	46.025	53.7181
codA	16128322	3069	b0337	355395	356678	+	427	COG0402FR	P	cytosine/isoguanine deaminase	8	8	3713604	3.48928e+06	3705401	3.49014e+06	749.574	706.029	727.801
frmB	16128340	3074	b0355	376759	377592	-	277	COG0627R	P	S-formylglutathione hydrolase	2	2	224325	280536	167585	183499	33.9012	37.1204	35.5108
frmA	16128341	3074	b0356	377686	378795	-	369	COG1062C	P	alcohol dehydrogenase class III/glutathione-dependent formaldehyde dehydrogenase	2	2	1.09595e+06	1.22828e+06	1.10355e+06	1.22554e+06	223.241	247.918	235.579
ddlA	16128366	1382609	b0381	399053	400147	-	364	COG1181M	P	D-alanine-D-alanine ligase A	5	5	738351	820239	753265	816322	152.38	165.136	158.758
PROC	16128371	1382612	b0386	404059	404868	-	269	COG0345E	P	pyrroline-5-carboxylate reductase, NAD(P)-binding	3	3	2.25725e+06	2.81662e+06	2.26273e+06	2810662	457.734	568.575	513.155
yaiE	16128376	3080	b0391	407401	407685	+	94	COG3123S	P	conserved protein, UPF0345 family	1	1	2.70237e+06	2831322
rdgC	16128378	1382613	b0393	408332	409243	-	303	COG2974L	P	nucleoid-associated ssDNA and dsDNA binding protein; competitive inhibitor of RecA function	4	4	1.57871e+06	1599979	1.57359e+06	1.59878e+06	318.325	323.421	320.873
sbcC	16128382	3081	b0397	411831	414977	-	1048	COG0419L	C	exonuclease, dsDNA, ATP-dependent	2	2	301394	317264	300861	316482	60.8619	64.0219	62.4419
proY	16128387	3083	b0402	420210	421583	+	457	COG1113E	P	proline-specific permease	1	1	117682	101661
queA	16128390	3084	b0405	424235	425305	+	356	COG0809J	P	S-adenosylmethionine:tRNA ribosyltransferase-isomerase	4	4	1.24832e+06	2.21069e+06	1.25965e+06	2.20545e+06	254.818	446.146	350.482
tgt	16128391	3084	b0406	425361	426488	+	375	COG0343J	P	tRNA-guanine transglycosylase	2	2	426762	458794	427170	464326	86.4132	93.9296	90.1714
yajC	16128392	3084	b0407	426511	426843	+	110	COG1862U	P	SecYEG protein translocase auxillary subunit	1	1	18726658	23837164
secD	16128393	3084	b0408	426871	428718	+	615	COG0342U	P	SecYEG protein translocase auxillary subunit	10	10	9470476	10516690	9650201	10799219	1952.16	2184.6	2068.38
secF	16128394	3084	b0409	428729	429700	+	323	COG0341U	P	SecYEG protein translocase auxillary subunit	4	3	692066	742671	504610	590399	102.079	119.433	110.756
yajD	16128395	1382615	b0410	429829	430176	+	115	-	P	conserved protein, HNH family	1	1	447636	431004
tsx	16128396	1382616	b0411	430353	431237	-	294	COG3248M	P	nucleoside channel, receptor of phage T6 and colicin K	6	6	2.34172e+06	2.33307e+06	2.44252e+06	2.27745e+06	494.104	460.711	477.408
nrdR	16128398	3085	b0413	432226	432675	+	149	COG1327K	P	conserved protein	3	3	1.88325e+06	2.22709e+06	1881922	2.27819e+06	380.698	460.86	420.779
ribD	16128399	3085	b0414	432679	433782	+	367	COG0117H	P	fused diaminohydroxyphosphoribosylaminopyrimidine deaminase and 5-amino-6-(5-phosphoribosylamino) uracil reductase	8	8	1.97008e+06	1.5926e+06	1.48965e+06	1.36754e+06	301.345	276.643	288.994
ribE	16128400	3085	b0415	433871	434341	+	156	COG0054H	P	riboflavin synthase beta chain	4	4	3946755	3.49995e+06	4.07873e+06	3387044	825.096	685.173	755.134
nusB	16128401	3085	b0416	434361	434780	+	139	COG0781K	P	transcription antitermination protein	2	2	1.60778e+06	1.80151e+06	1623235	1.81763e+06	328.368	367.693	348.03
thiL	16128402	3086	b0417	434858	435835	+	325	COG0611H	P	thiamin-monophosphate kinase	2	2	1.03838e+06	978770	1.04202e+06	981062	210.792	198.461	204.627
dxs	16128405	3087	b0420	437539	439401	-	620	COG1154HI	P	1-deoxyxylulose-5-phosphate synthase, thiamine-requiring, FAD-requiring	8	8	1615991	1.43495e+06	1.6173e+06	1.43954e+06	327.168	291.208	309.188
ispA	16128406	3087	b0421	439426	440325	-	299	COG0142H	P	geranyltranstransferase	1	1	1.69155e+06	2.02721e+06
xseB	16128407	3087	b0422	440325	440567	-	80	COG1722L	P	exonuclease VII small subunit	3	3	1.43971e+06	1618742	1.43597e+06	1.62061e+06	290.485	327.838	309.161
thiI	16128408	1382617	b0423	440773	442221	+	482	COG0301H	P	tRNA s(4)U8 sulfurtransferase	8	8	3.63825e+06	1.96763e+06	3.6001e+06	1.83013e+06	728.272	370.222	549.247
panE	16128410	3088	b0425	442828	443739	-	303	COG1893H	P	2-dehydropantoate reductase, NADPH-specific	1	1	605870	569803
cyoB	16128416	3089	b0431	447874	449865	-	663	COG0843C	C	cytochrome o ubiquinol oxidase subunit I	7	7	9922133	9926976	9912386	9923259	2005.2	2007.4	2006.3
cyoA	16128417	3089	b0432	449887	450834	-	315	COG1622C	C	cytochrome o ubiquinol oxidase subunit II	8	8	3.71759e+06	3941515	3.69819e+06	3.95413e+06	748.115	799.89	774.003
tig	16128421	1382618	b0436	454357	455655	+	432	COG0544O	P	peptidyl-prolyl cis/trans isomerase (trigger factor)	20	20	62182444	57353348	62331712	57527412	12609.2	11637.4	12123.3
CLPP	16128422	3091	b0437	455901	456524	+	207	COG0740OU	C	proteolytic subunit of ClpA-ClpP and ClpX-ClpP ATP-dependent serine proteases	4	4	6.48631e+06	6.03437e+06	6421604	6.02673e+06	1299.04	1219.16	1259.1
CLPX	16128423	3091	b0438	456650	457924	+	424	COG1219O	C	ATPase and specificity subunit of ClpX-ClpP ATP-dependent serine protease	12	12	8211012	8915069	8.18157e+06	8931853	1655.07	1806.85	1730.96
lon	16128424	1382619	b0439	458112	460466	+	784	COG0466O	P	DNA-binding ATP-dependent protease La	16	16	5.68095e+06	6.24284e+06	5.6769e+06	6.25778e+06	1148.39	1265.9	1207.15
hupB	16128425	1382620	b0440	460675	460947	+	90	COG0776L	C	HU, DNA-binding transcriptional regulator, beta subunit	3	3	20596230	21941512	20605598	21979228	4168.36	4446.23	4307.29
PPID	16128426	1382621	b0441	461139	463010	+	623	COG0760O	P	periplasmic folding chaperone, has an inactive PPIase domain	22	22	4944550	5.78038e+06	4806482	5.66202e+06	972.315	1145.38	1058.85
queC	16128429	3092	b0444	464076	464771	-	231	COG0603R	P	7-cyano-7-deazaguanine (preQ0) synthase; queuosine biosynthesis	3	3	607626	742148	624735	740171	126.379	149.731	138.055
glnK	16128435	3094	b0450	471822	472160	+	112	COG0347E	P	nitrogen assimilation regulatory protein for GlnL, GlnE, and AmtB	1	1	25411614	25162564
hha	16128444	3095	b0460	479314	479532	-	72	-	P	modulator of gene expression, with H-NS	1	1	1.01024e+06	1.09769e+06
acrB	16128446	3096	b0462	480478	483627	-	1049	COG0841V	C	multidrug efflux system protein	19	19	2.25362e+06	2.12037e+06	2.2515e+06	2122323	455.462	429.33	442.396
acrA	16128447	3096	b0463	483650	484843	-	397	COG0845M	C	multidrug efflux system	14	14	5.28518e+06	4460643	5.26208e+06	4461050	1064.48	902.436	983.457
mscK	16128449	1382629	b0465	485760	489122	+	1120	COG3264M	P	fused conserved protein	7	7	575072	533196	625512	593537	126.536	120.068	123.302
apt	16128453	3098	b0469	490636	491187	+	183	COG0503F	P	adenine phosphoribosyltransferase	1	1	3.85553e+06	4373032
dnaX	16128454	3098	b0470	491316	493247	+	643	COG2812L	P	DNA polymerase III/DNA elongation factor III, tau and gamma subunits	4	4	628916	725307	588348	679683	119.018	137.495	128.257
ybaB	16128455	3098	b0471	493300	493629	+	109	COG0718S	P	conserved protein	3	3	482229	414954	482722	415072	97.6511	83.9659	90.8085
htpG	16128457	1382631	b0473	494344	496218	+	624	COG0326O	P	protein refolding molecular co-chaperone Hsp90, Hsp70-dependent; heat-shock protein; ATPase	17	17	3.8016e+06	3.94207e+06	3.77722e+06	3950199	764.104	799.095	781.599
ADK	16128458	1382632	b0474	496399	497043	+	214	COG0563F	P	adenylate kinase	11	11	48605308	51005988	48564940	50949504	9824.32	10306.7	10065.5
hemH	16128459	1382633	b0475	497279	498241	+	320	COG0276H	P	ferrochelatase	1	1	138322	139432
ybaL	16128462	1382636	b0478	500786	502462	-	558	COG4651P	P	predicted transporter with NAD(P)-binding Rossmann-fold domain	2	3	501333	387946	414934	285426	83.938	57.7395	70.8388
ushA	16128464	1382638	b0480	504138	505790	+	550	COG0737F	P	bifunctional UDP-sugar hydrolase/5'-nucleotidase	8	8	1.04377e+06	919768	1.07658e+06	959056	217.783	194.01	205.896
ybaK	16128465	1382639	b0481	505827	506306	-	159	COG2606S	P	conserved protein	4	4	2.95545e+06	3.1161e+06	2960095	3.10525e+06	598.805	628.169	613.487
COPA	16128468	1382641	b0484	508099	510603	-	834	COG2217P	P	copper transporter	10	10	1576209	1431890	1.57339e+06	1.43181e+06	318.284	289.645	303.964
qmcA	16128473	3100	b0489	514080	514997	-	305	COG0330O	P	multicopy suppressor of ftsH htpX double mutant; membrane-anchored predicted protease with C-terminal cytoplasmic PHB domain	3	3	507453	449516	507731	445768	102.71	90.1754	96.4427
fetA	16128474	3101	b0490	515143	515820	+	225	COG4619R	P	predicted transporter subunit: ATP-binding component of ABC superfamily	2	2	45737.5	78804.1	46021.5	78632.1	9.30981	15.9067	12.6082
ybbO	16128477	3102	b0493	517564	518373	-	269	COG0300R	P	predicted oxidoreductase with NAD(P)-binding Rossmann-fold domain	2	2	319284	361415	318390	362253	64.408	73.2811	68.8445
tesA	16128478	3102	b0494	518363	518989	-	208	COG2755E	P	multifunctional acyl-CoA thioesterase I and protease I and lysophospholipase L1	5	5	947258	798320	942230	800808	190.606	161.997	176.302
ybbP	16128480	3103	b0496	519640	522054	+	804	COG3127Q	C	predicted ABC transporter permease	1	1	237683	129912
allR	16128490	3105	b0506	532235	533050	+	271	COG1414K	P	DNA-binding transcriptional repressor for all (allantoin) and gcl (glyoxylate) operons; glyoxylate-induced	5	5	2.10104e+06	2.33458e+06	2102718	2.33045e+06	425.364	471.431	448.398
allE	16128499	3108	b0515	542485	543270	-	261	COG3257R	P	conserved protein	2	2	436004	538491	574636	503318	116.245	101.817	109.031
purK	16128506	3110	b0522	550750	551817	-	355	COG0026F	P	N5-carboxyaminoimidazole ribonucleotide synthase	9	9	5836928	7108012	5.84915e+06	7124364	1183.24	1441.2	1312.22
purE	16128507	3110	b0523	551814	552323	-	169	COG0041F	P	N5-carboxyaminoimidazole ribonucleotide mutase	3	3	2.52442e+06	2.87768e+06	2.51876e+06	2.87987e+06	509.527	582.576	546.052
PPIB	16128509	3110	b0525	553166	553660	-	164	COG0652O	P	peptidyl-prolyl cis-trans isomerase B (rotamase B)	6	6	3.75603e+06	4051225	3766609	4048197	761.956	818.919	790.438
cysS	16128510	1382647	b0526	553834	555219	+	461	COG0215J	P	cysteinyl-tRNA synthetase	11	11	3.84673e+06	4.02081e+06	3.84501e+06	4.02542e+06	777.816	814.312	796.064
folD	16128513	3111	b0529	556098	556964	-	288	COG0190H	P	bifunctional 5,10-methylene-tetrahydrofolate dehydrogenase/ 5,10-methylene-tetrahydrofolate cyclohydrolase	7	7	6.52073e+06	6529081	6632743	6548832	1341.75	1324.78	1333.27
ompT	16128548	1382659	b0565	583903	584856	-	317	COG4571M	P	DLP12 prophage; outer membrane protease VII (outer membrane protein 3b)	19	19	81046720	72232680	80979088	72108536	16381.5	14587	15484.2
cusS	16128553	3118	b0570	592551	593993	-	480	COG0642T	C	sensory histidine kinase in two-component regulatory system with CusR, senses copper ions	1	1	91097.7	120540
cusC	16128555	1382661	b0572	594823	596196	+	457	COG1538MU	C	copper/silver efflux system, outer membrane component	6	6	858982	807968	855276	805882	173.016	163.024	168.02
cusF	16128556	3119	b0573	596354	596686	+	110	COG5569S	C	periplasmic copper- and silver-binding protein	2	2	3145902	2.52977e+06	3.44453e+06	2.52672e+06	696.803	511.135	603.969
cusB	16128557	3119	b0574	596702	597925	+	407	COG0845M	C	copper/silver efflux system, membrane fusion protein	5	5	2918961	2.93673e+06	2.91855e+06	2.93742e+06	590.399	594.217	592.308
cusA	16128558	3119	b0575	597937	601080	+	1047	COG3696P	C	copper/silver efflux system, membrane component	2	2	384665	1355198	236683	330612	47.8792	66.8802	57.3797
ybdG	16128560	1382662	b0577	602639	603886	-	415	COG0668M	P	mechanosensitive channel protein, miniconductance	2	2	294162	278354	292986	278474	59.2687	56.3332	57.801
nfsB	16128561	1382663	b0578	603994	604647	-	217	COG0778C	P	dihydropteridine reductase, NAD(P)H-dependent, oxygen-insensitive	8	8	7529258	7.77235e+06	7512348	7736753	1519.69	1565.09	1542.39
fepA	16128567	1382665	b0584	609477	611717	-	746	COG4771P	P	iron-enterobactin outer membrane transporter	2	2	159632	138560	159313	138090	32.2277	27.9346	30.0811
fepB	16128575	1382668	b0592	622777	623733	-	318	COG4592P	P	iron-enterobactin transporter subunit	1	1	233084	220052
entC	16128576	3123	b0593	624108	625283	+	391	COG1169HQ	P	isochorismate synthase 1	1	1	151119	165906
entB	16128578	3123	b0595	626917	627774	+	285	COG1535Q	P	isochorismatase	3	3	849977	848720	846522	851424	171.245	172.237	171.741
CSTA	16128581	1382669	b0598	629117	631222	+	701	COG1966T	P	carbon starvation protein	1	1	159985	18001.2
ybdH	16128582	1382670	b0599	631612	632700	-	362	COG0371C	P	predicted oxidoreductase	1	1	178000	264678
ahpC	16128588	1382673	b0605	638168	638731	+	187	COG0450O	C	alkyl hydroperoxide reductase, C22 subunit	6	6	45943256	39298524	45900080	39282724	9285.24	7946.6	8615.92
uspG	16128590	1382674	b0607	640662	641090	-	142	COG0589T	P	universal stress protein UP12	3	3	3.602e+06	3.61464e+06	3581480	3.61699e+06	724.506	731.69	728.098
rna	16128594	1382677	b0611	643420	644226	-	268	COG3719J	P	ribonuclease I	3	3	1269475	1.20235e+06	1272117	1.20523e+06	257.34	243.809	250.574
cspE	16128606	1382680	b0623	656515	656724	+	69	COG1278K	P	DNA-binding transcriptional repressor	3	3	65493172	87686424	65457572	88272208	13241.6	17856.8	15549.2
tatE	16128610	1382682	b0627	658170	658373	+	67	-	C	TatABCE protein translocation system subunit	1	1	1.61746e+06	1.50682e+06
lipA	16128611	1382683	b0628	658474	659439	-	321	COG0320H	P	lipoate synthase	8	8	4210769	5381882	4216431	5388083	852.952	1089.97	971.46
ybeD	16128614	3127	b0631	661602	661865	-	87	COG2921S	P	conserved protein, UPF0250 family	2	2	1.08368e+06	1.12944e+06	830869	878470	168.079	177.708	172.893
dacA	16128615	1382684	b0632	661975	663186	-	403	COG1686M	P	D-alanyl-D-alanine carboxypeptidase (penicillin-binding protein 5)	16	16	7204628	7121121	7205323	7.11469e+06	1457.58	1439.25	1448.41
rlpA	16128616	3128	b0633	663325	664413	-	362	COG0797M	P	septal ring protein, suppressor of prc, minor lipoprotein	5	5	1.30227e+06	1.29297e+06	1302119	1.29212e+06	263.409	261.386	262.398
mrdB	16128617	3128	b0634	664424	665536	-	370	COG0772D	P	cell wall shape-determining protein	1	1	65758	98526.2
mrdA	16128618	3128	b0635	665539	667440	-	633	COG0768M	P	transpeptidase involved in peptidoglycan synthesis (penicillin-binding protein 2)	3	3	223762	264946	164265	258795	33.2296	52.3523	42.7909
rlmH	16128619	3128	b0636	667471	667938	-	155	COG1576S	P	23S rRNA m(3)Psi1915 pseudouridine methyltransferase; SAM-dependent	1	1	140266	148768
lptE	16128624	3129	b0641	670828	671409	-	193	COG2980M	P	LPS assembly OM complex LptDE, lipoprotein component	4	4	1.00537e+06	1.10185e+06	1.00425e+06	1.1033e+06	203.152	223.188	213.17
leuS	16128625	3129	b0642	671424	674006	-	860	COG0495J	P	leucyl-tRNA synthetase	30	30	10162832	10885685	10131321	10876477	2049.49	2200.23	2124.86
rihA	16128634	3132	b0651	682700	683635	-	311	COG1957F	C	ribonucleoside hydrolase 1	2	2	381142	360170	380278	359586	76.9273	72.7416	74.8344
gltL	16128635	3132	b0652	683753	684478	-	241	COG1126E	C	glutamate, aspartate ABC transporter ATP-binding subunit	1	1	1.23771e+06	1.4579e+06
gltI	16128638	1382688	b0655	686062	686970	-	302	COG0834ET	P	glutamate, aspartate binding protein, periplasmic; part of GltJKLI ABC transporter	7	7	6274382	10133902	6244186	10134933	1263.15	2050.22	1656.69
ybeX	16128641	3133	b0658	690129	691007	-	292	COG4535P	P	predicteed ion transport	6	6	562444	620571	562065	622844	113.701	125.997	119.849
YBEY	16128642	3133	b0659	691097	691564	-	155	COG0319R	P	metal-binding heat shock protein required for rRNA maturation	1	1	295252	301366
miaB	16128644	1382690	b0661	692754	694178	-	474	COG0621J	P	tRNA-i(6)A37 methylthiotransferase	11	11	4332906	4722786	4331464	4.71121e+06	876.222	953.042	914.632
ubiF	16128645	1382691	b0662	694324	695499	+	391	COG0654HC	P	2-octaprenyl-3-methyl-6-methoxy-1,4-benzoquinol oxygenase	2	2	561879	612386	571095	611765	115.528	123.755	119.642
asnB	16128650	1382692	b0674	696736	698400	-	554	COG0367E	P	asparagine synthetase B	13	13	6872031	6572536	5797309	6.21884e+06	1172.75	1258.02	1215.39
umpH	16128651	3134	b0675	698797	699549	-	250	COG0647G	P	UMP phosphatase	3	3	796624	802169	807402	804578	163.331	162.76	163.046
nagC	16128652	3134	b0676	699597	700817	-	406	COG1940KG	P	DNA-binding transcriptional dual regulator, repressor of N-acetylglucosamine	3	3	556525	620798	555137	621896	112.3	125.805	119.052
NAGA	16128653	3134	b0677	700826	701974	-	382	COG1820G	P	N-acetylglucosamine-6-phosphate deacetylase	2	2	220524	233499	297536	330838	60.1893	66.9261	63.5577
nagB	16128654	3134	b0678	702034	702834	-	266	COG0363G	P	glucosamine-6-phosphate deaminase	3	3	1.24642e+06	1091515	1.24311e+06	1.09058e+06	251.473	220.616	236.044
nagE	16128655	1382693	b0679	703167	705113	+	648	COG1263G	C	fused N-acetyl glucosamine specific PTS enzyme: IIC, IIB, and IIA components	3	3	1.04932e+06	810493	1.02279e+06	789360	206.903	159.682	183.292
glnS	16128656	1382694	b0680	705316	706980	+	554	COG0008J	P	glutamyl-tRNA synthetase	13	12	7745008	7.49583e+06	7735038	7480045	1564.74	1513.16	1538.95
fur	16128659	3136	b0683	709423	709869	-	148	COG0735P	P	DNA-binding transcriptional dual regulator of siderophore biosynthesis and transport	5	5	4611871	4462965	4600563	4465136	930.659	903.263	916.961
fldA	16128660	1382695	b0684	710158	710688	-	176	COG0716C	P	flavodoxin 1	2	2	862226	558947	864268	548472	174.835	110.952	142.893
ybfF	16128662	1382696	b0686	711261	712025	-	254	COG0596R	P	acyl-CoA esterase in vitro	2	2	321286	560784	320983	563592	64.9325	114.01	89.4714
seqA	16128663	3137	b0687	712210	712755	+	181	COG3057L	P	regulatory protein for replication initiation	3	3	2.33677e+06	2001222	2.33482e+06	2.03479e+06	472.316	411.623	441.969
pgm	16128664	3137	b0688	712781	714421	+	546	COG0033G	P	phosphoglucomutase	13	13	5.4644e+06	6.39121e+06	5.49399e+06	6.38624e+06	1111.39	1291.89	1201.64
ybfA	16128675	1382698	b0699	728357	728563	+	68	-	P	predicted protein	1	1	118069	52955.6
ybgI	16128685	3142	b0710	742050	742793	+	247	COG0327S	P	conserved metal-binding protein, NIF3 family	5	5	2.80638e+06	2.87448e+06	2805343	2.87028e+06	567.499	580.635	574.067
ybgK	16128687	3142	b0712	743466	744398	+	310	COG1984E	P	predicted enzyme subunit	1	1	966282	802562
gltA	16128695	1382702	b0720	752408	753691	-	427	COG0372C	P	citrate synthase	9	9	10364442	11242340	9918431	11702309	2006.42	2367.29	2186.86
SDHC	16128696	3144	b0721	754400	754789	+	129	COG2009C	C	succinate dehydrogenase, membrane subunit, binds cytochrome b556	1	1	1.00192e+06	1210905
SDHD	16128697	3144	b0722	754783	755130	+	115	COG2142C	C	succinate dehydrogenase, membrane subunit, binds cytochrome b556	1	1	2565853	3.13976e+06
SDHA	16128698	3144	b0723	755130	756896	+	588	COG1053C	C	succinate dehydrogenase, flavoprotein subunit	11	11	11279036	10704066	11048461	9796606	2235.02	1981.78	2108.4
SDHB	16128699	3144	b0724	756912	757628	+	238	COG0479C	C	succinate dehydrogenase, FeS subunit	7	7	5.08768e+06	6745841	5085725	6751385	1028.8	1365.75	1197.28
sucA	16128701	3145	b0726	757929	760730	+	933	COG0567C	C	2-oxoglutarate decarboxylase, thiamin-requiring	24	24	6.73776e+06	6320533	6.73732e+06	6.28595e+06	1362.91	1271.6	1317.25
sucB	16128702	3145	b0727	760745	761962	+	405	COG0508C	C	dihydrolipoyltranssuccinase	10	10	12284888	10805340	12256826	10820195	2479.46	2188.84	2334.15
sucC	16128703	3146	b0728	762237	763403	+	388	COG0045C	C	succinyl-CoA synthetase, beta subunit	16	16	9456009	8.28398e+06	9435284	8.26343e+06	1908.69	1671.63	1790.16
sucD	16128704	3146	b0729	763403	764272	+	289	COG0074C	C	succinyl-CoA synthetase, NAD(P)-binding, alpha subunit	9	9	14092819	14679871	14052862	14661311	2842.79	2965.87	2904.33
mngR	16128705	1382703	b0730	764376	765098	-	240	COG2188K	P	DNA-binding transcriptional dual regulator, fatty-acyl-binding	1	1	237252	187130
cydB	16128709	3148	b0734	772265	773404	+	379	COG1294C	C	cytochrome d terminal oxidase, subunit II	2	2	6278547	4968666	6.25531e+06	4.97599e+06	1265.4	1006.6	1136
tolQ	16128712	3149	b0737	774376	775068	+	230	COG0811U	C	membrane spanning protein in TolA-TolQ-TolR complex	5	5	1.70446e+06	1.91461e+06	1711073	1.91864e+06	346.137	388.127	367.132
tolR	16128713	3149	b0738	775072	775500	+	142	COG0848U	C	membrane spanning protein in TolA-TolQ-TolR complex	1	1	755693	785387
tolA	16128714	3149	b0739	775565	776830	+	421	COG3064M	C	membrane anchored protein in TolA-TolQ-TolR complex	2	2	598617	585825	585194	581398	118.38	117.612	117.996
tolB	16128715	3150	b0740	776963	778255	+	430	COG0823U	P	periplasmic protein	11	11	5.69728e+06	6490502	5.67087e+06	6518120	1147.17	1318.57	1232.87
PAL	16128716	3150	b0741	778290	778811	+	173	COG2885M	P	peptidoglycan-associated outer membrane lipoprotein	8	8	10628532	11575445	10633662	11564373	2151.11	2339.38	2245.25
ybgF	16128717	3150	b0742	778821	779612	+	263	COG1729S	P	periplasmic TolA-binding protein	8	8	1.90137e+06	1.70179e+06	1.89874e+06	1.70349e+06	384.101	344.602	364.351
nadA	16128718	3151	b0750	781308	782351	+	347	COG0379H	P	quinolinate synthase, subunit A	3	3	1.19107e+06	1.14658e+06	1.19171e+06	1.14798e+06	241.073	232.228	236.651
pnuC	16128719	3151	b0751	782389	783108	+	239	COG3201H	P	nicotinamide mononucleotide transporter	1	1	28898.9	41934.8
aroG	16128722	1382706	b0754	784856	785908	+	350	COG0722E	P	3-deoxy-D-arabino-heptulosonate-7-phosphate synthase, phenylalanine repressible	11	11	21640978	25859182	21653734	25902964	4380.39	5239.97	4810.18
gpmA	16128723	1382707	b0755	786066	786818	-	250	COG0588G	P	phosphoglyceromutase 1	12	12	20714536	20098794	20619166	20123832	4171.1	4070.9	4121
GALM	16128724	3152	b0756	787020	788060	-	346	COG2017G	P	galactose-1-epimerase (mutarotase)	8	8	3.56418e+06	3.26616e+06	3.54857e+06	3.27136e+06	717.848	661.772	689.81
galK	16128725	3152	b0757	788054	789202	-	382	COG0153G	P	galactokinase	4	4	667556	645622	672680	651077	136.078	131.708	133.893
modF	16128728	3153	b0760	791539	793011	-	490	COG1119P	C	fused molybdate transporter subunits of ABC superfamily: ATP-binding components	3	3	672081	783516	646145	785102	130.71	158.82	144.765
modE	16128729	3153	b0761	793079	793867	-	262	COG2005R	C	DNA-binding transcriptional repressor for the molybdenum transport operon modABC	4	4	924721	797786	933296	805764	188.799	163	175.899
modA	16128731	3154	b0763	794312	795085	+	257	COG0725P	C	molybdate transporter subunit	2	2	399284	463765	771275	612446	156.023	123.893	139.958
ybhA	16128734	1382709	b0766	796836	797654	-	272	COG0561R	P	pyridoxal phosphate (PLP) phosphatase	2	2	537856	566395	540373	564216	109.313	114.137	111.725
pgl	16128735	1382710	b0767	797809	798804	+	331	COG2706G	P	6-phosphogluconolactonase	5	5	2.01068e+06	2.39035e+06	2029417	2.38375e+06	410.536	482.215	446.375
ybhC	16128740	1382711	b0772	805221	806504	-	427	COG4677G	P	acyl-CoA thioesterase, lipoprotein	7	7	5754791	6.00409e+06	5.75538e+06	5.99604e+06	1164.27	1212.95	1188.61
bioB	16128743	3157	b0775	808567	809607	+	346	COG0502H	P	biotin synthase	1	1	1.13286e+06	1.04412e+06
bioD	16128746	3157	b0778	811493	812170	+	225	COG0132H	P	dethiobiotin synthetase	4	4	783325	748228	782771	755207	158.349	152.773	155.561
uvrB	16128747	1382712	b0779	812749	814770	+	673	COG0556L	C	excinulease of nucleotide excision repair, DNA damage recognition component	3	3	363320	376239	370945	376118	75.0393	76.0858	75.5626
ybhK	16128748	1382713	b0780	814962	815870	-	302	COG0391S	P	predicted transferase with NAD(P)-binding Rossmann-fold domain	1	1	304838	367989
moaB	16128750	3158	b0782	817278	817790	+	170	COG0521H	P	molybdopterin biosynthesis protein B	7	7	4.59746e+06	5071367	4593329	5057683	929.195	1023.13	976.163
moaC	16128751	3158	b0783	817793	818278	+	161	COG0315H	P	molybdopterin biosynthesis, protein C	2	2	1371889	1264961	1.02258e+06	1.00446e+06	206.859	203.194	205.027
moaD	16128752	3158	b0784	818271	818516	+	81	COG1977H	P	molybdopterin synthase, small subunit	1	1	179596	170171
moaE	16128753	3158	b0785	818518	818970	+	150	COG0314H	P	molybdopterin synthase, large subunit	1	1	255246	170711
ybhG	16128763	3160	b0795	828197	829195	-	332	COG1566V	C	predicted membrane fusion protein (MFP) component of efflux pump, membrane anchor	2	2	1.2462e+06	345289	1.2372e+06	344830	250.276	69.7565	160.016
rhlE	16128765	1382717	b0797	830095	831459	+	454	COG0513LKJ	P	ATP-dependent RNA helicase	6	6	490691	593608	492890	591179	99.7079	119.591	109.649
ybiB	16128768	3161	b0800	834471	835433	+	320	COG0547E	P	predicted family 3 glycosyltransferase	9	9	2.93439e+06	2.92071e+06	2.92734e+06	2913467	592.178	589.372	590.775
ybiC	16128769	1382719	b0801	835574	836659	+	361	COG2055C	P	predicted dehydrogenase	5	5	1.06768e+06	1.16365e+06	929132	1.19751e+06	187.956	242.246	215.101
glnQ	16128777	3163	b0809	844964	845686	-	240	COG1126E	C	glutamine transporter subunit	3	3	2.42867e+06	2725890	2447380	2.73361e+06	495.086	552.988	524.037
glnP	16128778	3163	b0810	845683	846342	-	219	COG0765E	C	glutamine transporter subunit	3	3	1.14848e+06	1.08997e+06	1.14663e+06	1092229	231.954	220.95	226.452
glnH	16128779	3163	b0811	846481	847227	-	248	COG0834ET	C	glutamine transporter subunit	10	10	7.71052e+06	7.55364e+06	7553277	7.36874e+06	1527.97	1490.64	1509.3
dps	16128780	1382721	b0812	847631	848134	-	167	COG0783P	P	Fe-binding and storage protein	9	9	6792725	8895100	6.81205e+06	8883641	1378.03	1797.09	1587.56
ompX	16128782	1382723	b0814	849673	850188	+	171	COG3637M	P	outer membrane protein X	4	4	5.47189e+06	5.07535e+06	5.48426e+06	5.06836e+06	1109.42	1025.29	1067.36
ldtB	16128787	1382726	b0819	854047	854967	-	306	COG1376S	P	L,D-transpeptidase linking Lpp to murein	10	8	5.68983e+06	5.85053e+06	5693437	5.83675e+06	1151.74	1180.73	1166.23
ybiT	16128788	1382727	b0820	855186	856778	+	530	COG0488R	P	fused predicted transporter subunits of ABC superfamily: ATP-binding components	9	9	1.8655e+06	2070733	1.86472e+06	2.07435e+06	377.219	419.626	398.422
ybiV	16128790	1382729	b0822	858436	859251	-	271	COG0561R	P	sugar phosphatase; preference for fructose-1-P, ribose-5-P and glucose-6-P	2	2	380696	272823	316698	242920	64.0657	49.1409	56.6033
moeA	16128795	3166	b0827	864352	865587	-	411	COG0303H	P	molybdopterin biosynthesis protein	5	5	1.75851e+06	1.90699e+06	1.75337e+06	1.90477e+06	354.693	385.32	370.007
iaaA	16128796	3167	b0828	865791	866756	+	321	COG1446E	P	Isoaspartyl peptidase	1	1	717521	725379
gsiB	16128798	3167	b0830	868634	870172	+	512	COG0747E	P	glutathione periplasmic binding protein, ABC superfamily transporter	7	7	1.32314e+06	1.79853e+06	1.33131e+06	1832747	269.313	370.751	320.032
gsiC	16128799	3167	b0831	870190	871110	+	306	COG0601EP	P	glutathione transporter, permease component, ABC superfamily	2	2	1.0269e+06	99627.5
rimO	16128803	1382730	b0835	875933	877258	-	441	COG0621J	P	ribosomal protein S12 methylthiotransferase; radical SAM superfamily	4	4	1.12757e+06	1.02146e+06	1.12511e+06	1.02069e+06	227.602	206.477	217.04
dacC	16128807	1382733	b0839	879950	881152	+	400	COG1686M	P	D-alanyl-D-alanine carboxypeptidase (penicillin-binding protein 6a)	8	8	1.84199e+06	2.25221e+06	1.84265e+06	2.2461e+06	372.754	454.369	413.562
deoR	16128808	3169	b0840	881199	881957	-	252	COG1349KG	P	DNA-binding transcriptional repressor	2	2	153661	108022	135431	91270	27.3967	18.4632	22.9299
ybjL	16128815	1382737	b0847	887357	889042	-	561	COG2985R	P	predicted transporter	2	2	293267	436721	181046	294590	36.6243	59.5934	48.1088
grxA	16128817	1382739	b0849	889719	889976	-	85	COG0695O	P	glutaredoxin 1, redox coenzyme for ribonucleotide reductase (RNR1a)	1	1	942620	1.04728e+06
nfsA	16128819	3171	b0851	890407	891129	+	240	COG0778C	P	nitroreductase A, NADPH-dependent, FMN-dependent	3	3	576994	586838	575271	585621	116.373	118.467	117.42
potF	16128822	3172	b0854	893007	894119	+	370	COG0687E	C	putrescine transporter subunit: periplasmic-binding component of ABC superfamily	1	1	1.13138e+06	1.25544e+06
artJ	16128828	1382741	b0860	899067	899798	-	243	COG0834ET	C	arginine binding protein, periplasmic	10	10	7.33772e+06	9203774	7.31297e+06	9207983	1479.36	1862.7	1671.03
artQ	16128830	3173	b0862	900757	901473	-	238	COG4215E	C	arginine transporter subunit	1	1	606737	603359
artI	16128831	3173	b0863	901480	902211	-	243	COG0834ET	C	arginine transporter subunit	9	9	4.05971e+06	3.11608e+06	4.05563e+06	3.24956e+06	820.422	657.361	738.892
artP	16128832	3173	b0864	902229	902957	-	242	COG4161E	C	arginine transporter subunit	3	3	1.98443e+06	1.81767e+06	1.9839e+06	1.82798e+06	401.328	369.785	385.557
ybjP	16128833	1382742	b0865	903175	903690	-	171	-	P	lipoprotein	2	2	1.50861e+06	1.43254e+06	1.50561e+06	1.43391e+06	304.573	290.069	297.321
ybjQ	16128834	3174	b0866	903816	904139	+	107	COG0393S	P	conserved protein, UPF0145 family	2	2	1.79503e+06	1.40166e+06	1.79467e+06	1.41821e+06	363.047	286.892	324.97
ltaE	16128838	3175	b0870	907516	908517	-	333	COG2008E	P	L-allo-threonine aldolase, PLP-dependent	7	7	3.7216e+06	3.46136e+06	3717052	3.46734e+06	751.931	701.416	726.674
ybjD	16128844	1382744	b0876	915696	917354	+	552	COG3593L	P	conserved protein with nucleoside triphosphate hydrolase domain	1	1	245667	251015
ybjX	16128845	1382745	b0877	917351	918343	-	330	COG2990S	P	conserved protein	3	3	1161440	1.18428e+06	1.15756e+06	1.18215e+06	234.166	239.139	236.652
macB	16128847	3177	b0879	919570	921516	+	648	COG1136V	C	fused macrolide transporter subunits of ABC superfamily: ATP-binding component/membrane component	1	1	13621564	23512070
cspD	16128848	1382746	b0880	921589	921813	-	74	COG1278K	P	inhibitor of DNA replication, cold shock protein homolog	1	1	257488	544922
clpA	16128850	3178	b0882	922487	924763	+	758	COG0542O	P	ATPase and specificity subunit of ClpA-ClpP ATP-dependent serine protease, chaperone activity	16	16	4033494	5.04541e+06	4.0295e+06	5084956	815.137	1028.65	921.892
INFA	16128851	1382747	b0884	925448	925666	-	72	COG0361J	P	translation initiation factor IF-1	1	1	8008830	11457857
cydC	16128853	3179	b0886	926697	928418	-	573	COG4987CO	C	fused glutathione, cysteine exporter subunits of ABC superfamily: membrane component/ATP-binding component	4	4	336836	317426	342413	327860	69.2676	66.3237	67.7956
cydD	16128854	3179	b0887	928419	930185	-	588	COG4988CO	C	fused glutathione, cysteine exporter subunits of ABC superfamily: membrane component/ATP-binding component	6	6	617183	606818	714432	696201	144.524	140.836	142.68
trxB	16128855	1382748	b0888	930308	931273	-	321	COG0492O	P	thioredoxin reductase, FAD/NAD(P)-binding	5	5	3.20376e+06	2.70195e+06	3.19609e+06	2.69693e+06	646.545	545.568	596.056
lrp	16128856	1382749	b0889	931818	932312	+	164	COG1522K	P	DNA-binding transcriptional dual regulator, leucine-binding	8	8	21760042	20153960	21782144	20148480	4406.36	4075.88	4241.12
ftsK	16128857	1382750	b0890	932447	936436	+	1329	COG1674D	P	DNA translocase at septal ring sorting daughter chromsomes	3	3	383438	249438	343692	248847	69.5263	50.3398	59.933
RARA	16128859	3180	b0892	937217	938560	+	447	COG2256L	P	DNA-dependent ATPase involved in processing recombination intermediates at replication forks	1	1	460243	520541
serS	16128860	3180	b0893	938651	939943	+	430	COG0172J	P	seryl-tRNA synthetase, also charges selenocysteinyl-tRNA with serine	15	15	16993126	19773434	16971566	19743310	3433.22	3993.92	3713.57
dmsB	16128862	3181	b0895	942637	943254	+	205	COG0437C	C	dimethyl sulfoxide reductase, anaerobic, subunit B	1	1	1.00461e+06	1.22004e+06
pflA	16128869	1382755	b0902	949563	950303	-	246	COG1180O	P	pyruvate formate lyase activating enzyme 1	5	5	1.52071e+06	1.70209e+06	1.51826e+06	1.70199e+06	307.133	344.299	325.716
pflB	16128870	3182	b0903	950495	952777	-	760	COG1882C	P	pyruvate formate lyase I	37	36	189907808	181632432	189281968	181579232	38290.3	36732.1	37511.2
focA	16128871	3182	b0904	952832	953689	-	285	COG2116P	P	formate channel	1	1	987433	1.08389e+06
serC	16128874	3183	b0907	956876	957964	+	362	COG1932HE	P	3-phosphoserine/phosphohydroxythreonine aminotransferase	13	13	33249600	33989952	33204996	33965396	6717.12	6870.94	6794.03
aroA	16128875	3183	b0908	958035	959318	+	427	COG0128E	P	5-enolpyruvylshikimate-3-phosphate synthetase	12	12	5.18879e+06	5142357	5182304	5149822	1048.34	1041.77	1045.06
cmk	16128877	3184	b0910	960424	961107	+	227	COG0283F	P	cytidylate kinase	3	3	1.1352e+06	1.12574e+06	1.12482e+06	1.12841e+06	227.542	228.269	227.905
RPSA	16128878	3184	b0911	961218	962891	+	557	COG0539J	P	30S ribosomal subunit protein S1	21	21	28157908	26587996	28089098	26637182	5682.21	5388.5	5535.35
ihfB	16128879	1382757	b0912	963051	963335	+	94	COG0776L	C	integration host factor (IHF), DNA-binding protein, beta subunit	4	4	3647089	2841532	3.64483e+06	2.83342e+06	737.321	573.179	655.25
msbA	16128881	3185	b0914	965844	967592	+	582	COG1132V	P	fused lipid transporter subunits of ABC superfamily: membrane component/ATP-binding component	5	5	892870	921795	935451	961903	189.235	194.586	191.91
ycaR	16128884	3185	b0917	969896	970078	+	60	COG2835S	P	conserved protein, UPF0434 family	1	1	2.50386e+06	2909968
kdsB	16128885	3185	b0918	970075	970821	+	248	COG1212M	P	3-deoxy-manno-octulosonate cytidylyltransferase	4	4	798732	647867	712129	627543	144.058	126.947	135.503
mukF	16128889	3186	b0922	973542	974864	+	440	COG3006D	C	chromosome condensin MukBEF, kleisin-like subunit, binds calcium	2	2	513313	469959	513265	470684	103.83	95.2158	99.5227
mukB	16128891	3186	b0924	975549	980009	+	1486	COG3096D	C	chromosome condensin MukBEF, ATPase and DNA-binding subunit	12	12	1.20756e+06	1.25933e+06	1.25156e+06	1.36887e+06	253.181	276.913	265.047
ldtD	16128892	1382760	b0925	980270	982117	+	615	COG2989S	P	murein L,D-transpeptidase	1	1	88070.6	81293.6
ycbL	16128894	3187	b0927	982873	983520	+	215	COG0491R	P	predicted metal-binding enzyme	3	3	1.34937e+06	1.40708e+06	1.35091e+06	1.40462e+06	273.279	284.143	278.711
aspC	16128895	1382761	b0928	983742	984932	-	396	COG1448E	P	aspartate aminotransferase, PLP-dependent	20	20	35955088	39409900	35843560	39451832	7250.88	7980.8	7615.84
ompF	16128896	1382762	b0929	985117	986205	-	362	COG3203M	C	outer membrane porin 1a (Ia;b;F)	11	11	27782444	26479864	27604182	26537940	5584.12	5368.42	5476.27
ASNS	16128897	1382763	b0930	986808	988208	-	466	COG0017J	P	asparaginyl tRNA synthetase	20	20	14727350	16985644	14694827	16926854	2972.65	3424.17	3198.41
pncB	16128898	1382764	b0931	988377	989579	-	400	COG1488H	P	nicotinate phosphoribosyltransferase	11	11	2.31718e+06	2.59181e+06	2316196	2.59676e+06	468.549	525.304	496.926
pepN	16128899	1382765	b0932	989845	992457	+	870	COG0308E	P	aminopeptidase N	18	18	4.74141e+06	4.1929e+06	4.74045e+06	4.21152e+06	958.957	851.959	905.458
PYRD	16128912	1382766	b0945	1003991	1005001	+	336	COG0167F	P	dihydro-orotate oxidase, FMN-linked	10	10	7.33443e+06	8488292	7.31196e+06	8463818	1479.15	1712.17	1595.66
ycbX	16128914	1382767	b0947	1005714	1006823	-	369	COG3217R	P	predicted 2Fe-2S cluster-containing protein; 6-N-hydroxylaminopurine resistance protein	6	6	672984	664478	672441	677239	136.03	137	136.515
rlmL	16128915	3190	b0948	1007067	1009175	+	702	COG0116L	P	23S rRNA mG2445 methyltransferase, SAM-dependent	4	4	429343	414704	420543	409259	85.0727	82.7899	83.9313
uup	16128916	3190	b0949	1009187	1011094	+	635	COG0488R	P	fused predicted transporter subunits of ABC superfamily: ATP-binding components	5	5	745187	682691	744876	675050	150.683	136.557	143.62
pqiB	16128918	3191	b0951	1012482	1014122	+	546	COG3008R	P	paraquat-inducible protein B	4	4	374973	440108	371298	432093	75.1107	87.4091	81.2599
fabA	16128921	3192	b0954	1015175	1015693	-	172	COG0764I	P	beta-hydroxydecanoyl thioester dehydrase	5	5	11274453	8719404	11273062	8739266	2280.45	1767.89	2024.17
ycbZ	16128922	3192	b0955	1015762	1017522	-	586	COG1067O	P	predicted peptidase	2	2	206902	278423	221268	269994	44.7609	54.6177	49.6893
matP	16128923	1382769	b0956	1017708	1018160	+	150	COG3120S	P	Ter macrodomain organizer matS-binding protein	1	1	648468	588401
ompA	16128924	1382770	b0957	1018236	1019276	-	346	COG2885M	P	outer membrane protein A (3a;II*;G;d)	15	15	320309312	339931456	321191584	340366784	64974.6	68853.6	66914.1
yccF	16128928	3193	b0961	1023125	1023571	-	148	COG3304S	P	inner membrane protein, DUF307 family	1	1	1.63332e+06	1.99496e+06
helD	16128929	1382773	b0962	1023694	1025748	+	684	COG0210L	P	DNA helicase IV	7	7	414241	417279	479297	921682	96.9581	186.449	141.704
yccX	16128935	1382775	b0968	1029287	1029565	+	92	COG1254C	P	weak acylphosphatase	1	1	218777
hyaA	16128938	3195	b0972	1031362	1032480	+	372	COG1740C	C	hydrogenase 1, small subunit	1	1	13979.2	5243.25
cspG	16128956	1382779	b0990	1050684	1050896	+	70	COG1278K	P	cold shock protein homolog, cold-inducible	1	1	653713	2.28669e+06
cbpA	16128966	3201	b1000	1062078	1062998	-	306	COG0484O	P	curved DNA-binding protein, DnaJ homologue that functions as a co-chaperone of DnaK	2	2	28204.3	33707.3	35680.2	39499.9	7.21784	7.99053	7.60419
AGP	16128968	1382784	b1002	1064808	1066049	+	413	-	P	glucose-1-phosphatase/inositol phosphatase	6	5	803726	906698	802509	905119	162.341	183.099	172.72
wrbA	16128970	3202	b1004	1066335	1066931	-	198	COG0655R	P	NAD(P)H:quinone oxidoreductase	5	5	530031	453448	530118	520469	107.239	105.287	106.263
efeO	16128982	3204	b1018	1081466	1082593	+	375	COG2822P	P	inactive ferrous ion transporter EfeUOB	6	6	1.37547e+06	1581055	1.37516e+06	1581961	278.184	320.019	299.101
ycdX	16128997	3207	b1034	1098102	1098839	+	245	COG1387ER	P	predicted zinc-binding hydrolase	2	2	3.13051e+06	2.61553e+06	3.11058e+06	2.62215e+06	629.246	530.441	579.844
ycdY	16128998	3207	b1035	1098863	1099417	+	184	COG3381R	P	conserved protein, REMP family	3	3	1.95369e+06	1.93294e+06	1.94703e+06	1.93318e+06	393.87	391.068	392.469
ymdB	16129008	3210	b1045	1105043	1105576	+	177	COG2110R	P	O-acetyl-ADP-ribose deacetylase; RNase III inhibitor during cold shock	3	3	313966	327596	314242	327068	63.5687	66.1633	64.866
opgG	16129011	3211	b1048	1108558	1110093	+	511	COG3131P	P	osmoregulated periplasmic glucan (OPG) biosynthesis periplasmic protein	16	16	5754891	6017794	5736993	6021856	1160.55	1218.18	1189.36
opgH	16129012	3211	b1049	1110086	1112629	+	847	COG2943M	P	membrane glycosyltransferase	7	7	1.43484e+06	1606133	1.43648e+06	1.609e+06	290.59	325.488	308.039
yceI	16129019	3212	b1056	1117124	1117699	-	191	COG2353S	P	secreted protein	3	3	1.3811e+06	2174075	1.3763e+06	2.17996e+06	278.415	440.988	359.702
solA	16129022	3213	b1059	1118691	1119809	-	372	COG0665E	P	N-methyltryptophan oxidase, FAD-binding	9	9	2.6148e+06	2750721	2.67648e+06	2.83434e+06	541.432	573.365	557.399
pyrC	16129025	1382797	b1062	1120784	1121830	-	348	COG0418F	P	dihydro-orotase	11	11	12837549	14630719	12885919	14611419	2606.72	2955.78	2781.25
yceB	16129026	1382798	b1063	1121936	1122496	-	186	-	P	lipoprotein, DUF1439 family	1	1	920601	1.28795e+06
grxB	16129027	3214	b1064	1122630	1123277	-	215	COG2999O	P	glutaredoxin 2 (Grx2)	7	7	4946524	5217266	4.91998e+06	5143073	995.274	1040.4	1017.84
rimJ	16129029	3215	b1066	1124785	1125369	+	194	COG1670J	P	ribosomal-protein-S5-alanine N-acetyltransferase	2	2	347906	322701	360046	330144	72.8345	66.7855	69.81
yceH	16129030	3215	b1067	1125380	1126027	+	215	COG3132S	P	conserved protein, UPF0502 family	4	4	1705557	1.80372e+06	1.70361e+06	1.80412e+06	344.626	364.96	354.793
rne	16129047	1382801	b1084	1140405	1143590	-	1061	COG1530J	C	fused ribonucleaseE: endoribonuclease/RNA-binding protein/RNA degradosome binding protein	23	23	5.2338e+06	6.61672e+06	5239849	6582326	1059.98	1331.55	1195.77
rluC	16129049	1382802	b1086	1144163	1145122	+	319	COG0564J	P	23S rRNA pseudouridine synthase; specific to U955, U2504, and U2580	5	5	411617	470540	414457	484539	83.8414	98.0185	90.93
yceD	16129051	3219	b1088	1146017	1146538	+	173	COG1399R	P	conserved protein, DUF177 family	1	1	2028147	1.68589e+06
rpmF	16129052	3219	b1089	1146590	1146763	+	57	COG0333J	P	50S ribosomal subunit protein L32	2	2	5.55644e+06	8621795	5586177	7581425	1130.04	1533.66	1331.85
fabH	16129054	3219	b1091	1147982	1148935	+	317	COG0332I	P	3-oxoacyl-[acyl-carrier-protein] synthase III	6	6	4.58543e+06	4221016	4.58439e+06	4227852	927.387	855.262	891.325
fabD	16129055	3219	b1092	1148951	1149880	+	309	COG0331I	P	malonyl-CoA-[acyl-carrier-protein] transacylase	6	6	4.755e+06	5.76334e+06	4735158	5782719	957.886	1169.8	1063.84
fabG	16129056	3219	b1093	1149893	1150627	+	244	COG1028IQR	P	3-oxoacyl-[acyl-carrier-protein] reductase	6	6	24170508	28103526	24145992	28101504	4884.55	5684.72	5284.63
ACPP	16129057	1382803	b1094	1150838	1151074	+	78	COG0236IQ	P	acyl carrier protein (ACP)	3	3	68270688	74455952	68119928	74642736	13780.1	15099.7	14439.9
fabF	16129058	1382804	b1095	1151162	1152403	+	413	COG0304IQ	P	3-oxoacyl-[acyl-carrier-protein] synthase II	8	8	7465035	8541798	7.46834e+06	8504178	1510.79	1720.33	1615.56
yceG	16129060	3220	b1097	1153335	1154357	+	340	COG1559R	P	predicted aminodeoxychorismate lyase	1	1	158465	131561
tmk	16129061	3220	b1098	1154347	1154988	+	213	COG0125F	P	thymidylate kinase	2	2	170807	163373	170088	163270	34.4076	33.0283	33.718
ycfH	16129063	3220	b1100	1156000	1156797	+	265	COG0084L	P	predicted DNAse	3	3	1.99024e+06	1.72671e+06	2.43422e+06	1.43579e+06	492.423	290.449	391.436
ptsG	16129064	1382805	b1101	1157092	1158525	+	477	COG1263G	C	fused glucose-specific PTS enzymes: IIB component/IIC component	12	12	10077909	10281476	10076897	10297820	2038.48	2083.17	2060.82
lpoB	16129068	3221	b1105	1161861	1162502	+	213	COG3417R	P	outer membrane lipoprotein	3	3	2.25781e+06	2.18482e+06	2.26002e+06	2.18566e+06	457.186	442.142	449.664
nagZ	16129070	3221	b1107	1163318	1164343	+	341	COG1472G	P	beta N-acetyl-glucosaminidase	2	2	88462.4	103251	89142.9	103076	18.0329	20.8515	19.4422
ndh	16129072	1382807	b1109	1165308	1166612	+	434	COG1252C	P	respiratory NADH dehydrogenase 2/cupric reductase	9	9	2.35696e+06	2.11647e+06	2.36197e+06	2113321	477.809	427.509	452.659
ldtC	16129076	1382810	b1113	1168635	1169597	-	320	COG1376S	P	L,D-transpeptidase linking Lpp to murein	1	1	133327	127130
mfd	16129077	1382811	b1114	1169741	1173187	-	1148	COG1197LK	P	transcription-repair coupling factor	14	14	3.27082e+06	3.49298e+06	3.25503e+06	3.49566e+06	658.468	707.145	682.806
lolC	16129079	3222	b1116	1174650	1175849	+	399	COG4591M	C	lipoprotein-releasing system transmembrane protein	4	4	866469	924219	868666	925029	175.724	187.126	181.425
lolE	16129081	3222	b1118	1176543	1177787	+	414	COG4591M	C	lipoprotein-releasing system transmembrane protein	1	1	487444	472256
potD	16129086	3223	b1123	1181006	1182052	-	348	COG0687E	P	polyamine transporter subunit	14	14	8325660	6715022	8314301	6721141	1681.92	1359.64	1520.78
potC	16129087	3223	b1124	1182049	1182843	-	264	COG1177E	P	polyamine transporter subunit	1	1	408324	569359
potA	16129089	3223	b1126	1183681	1184817	-	378	COG3842E	P	polyamine transporter subunit	7	7	1.96973e+06	2.13543e+06	1.97793e+06	2.13547e+06	400.121	431.99	416.055
pepT	16129090	1382813	b1127	1185067	1186293	+	408	COG2195E	P	peptidase T	10	11	2.55387e+06	1995083	2.55434e+06	1987862	516.724	402.129	459.427
phoQ	16129092	3224	b1129	1187539	1188999	-	486	COG0642T	P	sensory histidine kinase in two-component regulatory system with PhoP	2	2	425812	212364	426433	395980	86.2641	80.1037	83.1839
phoP	16129093	3224	b1130	1188999	1189670	-	223	COG0745TK	P	DNA-binding response regulator in two-component regulatory system with PhoQ	8	8	5.23865e+06	5.10339e+06	5244411	5.10779e+06	1060.9	1033.27	1047.09
PURB	16129094	3225	b1131	1189839	1191209	-	456	COG0015F	P	adenylosuccinate lyase	16	16	13464701	12462054	13455162	12472141	2721.88	2523.02	2622.45
hflD	16129095	3225	b1132	1191213	1191854	-	213	COG2915R	P	predicted lysogenization regulator	4	4	558821	520026	555502	519448	112.374	105.08	108.727
nudJ	16129097	3225	b1134	1193050	1193511	-	153	COG1051F	P	bifunctional thiamin pyrimidine pyrophosphate hydrolase/ thiamin pyrophosphate hydrolase	1	1	282091	288858
icd	16129099	1382814	b1136	1194346	1195596	+	416	COG0538C	P	e14 prophage; isocitrate dehydrogenase, specific for NADP+	20	20	126479960	134553424	126731592	134182544	25636.8	27144.1	26390.5
minE	16129137	3232	b1174	1223502	1223768	-	88	COG0851D	P	cell division topological specificity factor	2	2	2.70548e+06	2938888	2706431	2930679	547.49	592.854	570.172
minD	16129138	3232	b1175	1223772	1224584	-	270	COG2894D	P	membrane ATPase of the MinC-MinD-MinE system	8	8	9466185	8.15605e+06	9442083	8134465	1910.06	1645.54	1777.8
minC	16129139	3232	b1176	1224608	1225303	-	231	COG0850D	P	cell division inhibitor	4	4	840944	863564	866063	865747	175.198	175.134	175.166
pliG	16129141	1382827	b1178	1226294	1226695	-	133	-	P	predicted protein	2	2	254707	186827	253110	190069	51.2023	38.4496	44.8259
ycgM	16129143	1382828	b1180	1227302	1227961	+	219	COG0179Q	P	predicted isomerase/hydrolase	2	2	340338	391736	338881	389909	68.553	78.8756	73.7143
nhaB	16129149	1382829	b1186	1232399	1233940	-	513	COG3067P	P	sodium:proton antiporter	3	3	729557	621159	730340	620897	147.742	125.603	136.672
fadR	16129150	1382830	b1187	1234161	1234880	+	239	COG2186K	P	DNA-binding transcriptional dual regulator of fatty acid metabolism	3	3	5.45167e+06	5003386	5.45753e+06	5.01802e+06	1104.02	1015.11	1059.56
dadA	16129152	3234	b1189	1236794	1238092	+	432	COG0665E	P	D-amino acid dehydrogenase	2	2	40675804	50093748	40587660	49895264	8210.57	10093.4	9152
Ldca	16129155	1382832	b1192	1241389	1242303	-	304	COG1619V	P	L,D-carboxypeptidase A	1	1	298143	399659
dhaL	16129162	3235	b1199	1248348	1248980	-	210	COG2376G	C	dihydroxyacetone kinase, C-terminal domain	2	2	370537	322339	371784	321814	75.209	65.1004	70.1547
ychF	16129166	1382838	b1203	1255944	1257035	-	363	COG0012J	P	ATPase, K+-dependent, ribosome-associated	7	7	4.02182e+06	4504547	4.0323e+06	4.51318e+06	815.703	912.983	864.343
PTH	16129167	1382839	b1204	1257152	1257736	-	194	COG0193J	P	peptidyl-tRNA hydrolase	4	4	1.38819e+06	1.53009e+06	1.38787e+06	1.53104e+06	280.755	309.717	295.236
prs	16129170	1382841	b1207	1260151	1261098	-	315	COG0462FE	P	phosphoribosylpyrophosphate synthase	8	8	16906032	17414658	16926102	17389856	3424.02	3517.84	3470.93
ispE	16129171	3236	b1208	1261249	1262100	-	283	COG1947I	P	4-diphosphocytidyl-2-C-methylerythritol kinase	1	1	561202	383545
lolB	16129172	3236	b1209	1262100	1262723	-	207	COG3017M	P	OM lipoprotein required for localization of lipoproteins	8	8	3.2362e+06	3127817	3.22403e+06	3.11925e+06	652.197	631.001	641.599
hemA	16129173	3237	b1210	1262937	1264193	+	418	COG0373H	P	glutamyl tRNA reductase	2	2	63433.5	46537.2	52918.9	71475.5	10.7051	14.459	12.582
prfA	16129174	3237	b1211	1264235	1265317	+	360	COG0216J	P	peptide chain release factor RF-1	5	5	548819	473847	546745	467011	110.602	94.4728	102.538
kdsA	16129178	3237	b1215	1267388	1268242	+	284	COG2877M	P	3-deoxy-D-manno-octulosonate 8-phosphate synthase	10	10	6243675	7264006	6.23792e+06	7.26095e+06	1261.88	1468.84	1365.36
chaA	16129179	1382842	b1216	1269972	1271072	-	366	COG0387P	P	calcium/sodium:proton antiporter	2	2	366972	377301	365400	379872	73.9176	76.8453	75.3815
ychN	16129182	1382844	b1219	1272469	1272822	-	117	COG1553P	P	conserved protein	3	3	1.1028e+06	992964	905775	808486	183.231	163.55	173.391
narL	16129184	3238	b1221	1274402	1275052	-	216	COG2197TK	P	DNA-binding response regulator in two-component regulatory system with NarX (or NarQ)	4	4	3.47187e+06	3.81678e+06	3.43759e+06	3.81229e+06	695.398	771.197	733.298
narX	16129185	3238	b1222	1275045	1276841	-	598	COG3850T	P	sensory histidine kinase in two-component regulatory system with NarL	1	1	15011.7	43813.5
narG	16129187	3239	b1224	1279087	1282830	+	1247	COG5013C	C	nitrate reductase 1, alpha subunit	9	8	1.26492e+06	1.46813e+06	1.22679e+06	1.43326e+06	248.169	289.937	269.053
narH	16129188	3239	b1225	1282827	1284365	+	512	COG1140C	C	nitrate reductase 1, beta (Fe-S) subunit	2	2	194107	198450	193639	197079	39.1718	39.8676	39.5197
narJ	16129189	3239	b1226	1284362	1285072	+	236	COG2180C	C	molybdenum-cofactor-assembly chaperone subunit (delta subunit) of nitrate reductase 1	1	1	57093.9	69613.2
purU	16129193	3240	b1232	1287005	1287847	-	280	COG0788F	P	formyltetrahydrofolate hydrolase	6	6	10847834	11944729	10852513	11679550	2195.38	2362.68	2279.03
galU	16129197	1382847	b1236	1290680	1291588	+	302	COG1210M	P	glucose-1-phosphate uridylyltransferase	7	7	13413298	13214978	13402768	13186053	2711.28	2667.44	2689.36
hns	16129198	1382848	b1237	1291732	1292145	-	137	COG2916R	P	global DNA-binding transcriptional dual regulator H-NS	6	5	39552528	44130832	39658532	44223716	8022.62	8946.12	8484.37
tdk	16129199	1382849	b1238	1292750	1293367	+	205	COG1435F	P	thymidine kinase/deoxyuridine kinase	3	3	1.53395e+06	1.76635e+06	387626	1.82284e+06	78.4139	368.747	223.58
adhE	16129202	1382850	b1241	1294669	1297344	-	891	COG1454C	P	fused acetaldehyde-CoA dehydrogenase/iron-dependent alcohol dehydrogenase/pyruvate-formate lyase deactivase	40	40	63020892	63102016	62974944	62799660	12739.4	12703.9	12721.6
oppA	16129204	3241	b1243	1299206	1300837	+	543	COG4166E	C	oligopeptide transporter subunit	27	27	115552896	121169280	115336096	121653240	23331.6	24609.5	23970.6
oppB	16129205	3241	b1244	1300923	1301843	+	306	COG0601EP	C	oligopeptide transporter subunit	5	5	4.17766e+06	4124569	4.16833e+06	4110948	843.222	831.613	837.418
oppC	16129206	3241	b1245	1301858	1302766	+	302	COG1173EP	C	oligopeptide transporter subunit	4	4	3.67413e+06	3385544	3.66906e+06	3.39141e+06	742.222	686.057	714.14
oppF	16129208	3241	b1247	1303788	1304792	+	334	COG4608E	C	oligopeptide transporter subunit	14	14	7005329	7.26305e+06	7.00286e+06	7256887	1416.63	1468.01	1442.32
clsA	16129210	3242	b1249	1305209	1306669	-	486	COG1502I	P	cardiolipin synthase 1	4	3	292155	389332	140133	415311	28.3478	84.0142	56.181
kch	16129211	1382852	b1250	1307040	1308293	-	417	COG0569P	P	voltage-gated potassium channel	2	2	270715	186739	300289	186246	60.7462	37.6762	49.2112
ompW	16129217	1382854	b1256	1312044	1312682	+	212	COG3047M	C	outer membrane protein W	4	4	7.72762e+06	6277890	8257493	6272409	1670.43	1268.86	1469.64
trpA	16129221	3245	b1260	1314440	1315246	-	268	COG0159E	P	tryptophan synthase, alpha subunit	10	10	5.11713e+06	6032140	5.11648e+06	6.03395e+06	1035.03	1220.62	1127.82
trpB	16129222	3245	b1261	1315246	1316439	-	397	COG0133E	P	tryptophan synthase, beta subunit	11	11	3.5676e+06	3.75328e+06	3.55053e+06	3.75515e+06	718.246	759.639	738.942
trpD	16129224	3245	b1263	1317813	1319408	-	531	COG0547E	P	fused glutamine amidotransferase (component II) of anthranilate synthase/anthranilate phosphoribosyl transferase	5	5	998096	1.05325e+06	997777	1.05695e+06	201.843	213.814	207.828
trpE	16129225	3245	b1264	1319408	1320970	-	520	COG0147EH	P	component I of anthranilate synthase	7	7	3.64671e+06	3.54438e+06	3.49318e+06	3437026	706.643	695.284	700.964
rluB	16129230	1382855	b1269	1324876	1325751	+	291	COG1187J	P	23S rRNA pseudouridylate synthase	5	5	1.82515e+06	1.68575e+06	1.85513e+06	1.75312e+06	375.278	354.644	364.961
yciK	16129232	3247	b1271	1326378	1327136	-	252	COG1028IQR	P	predicted oxoacyl-(acyl carrier protein) reductase, EmrKY-TolC system	3	3	1422547	1824080	1.41978e+06	1.82285e+06	287.21	368.748	327.979
sohB	16129233	1382856	b1272	1327356	1328405	+	349	COG0616OU	P	predicted inner membrane peptidase; multicopy suppressor of htrA(degP)	11	11	2.23908e+06	2.47561e+06	2.23287e+06	2.47661e+06	451.693	500.999	476.346
yciN	16129234	1382857	b1273	1328441	1328692	-	83	-	P	DUF2498 protein YciN	2	2	1176372	1186935	1177862	1.17938e+06	238.272	238.58	238.426
topA	16129235	1382858	b1274	1329072	1331669	+	865	COG0550L	P	DNA topoisomerase I, omega subunit	16	16	2.32205e+06	2.72232e+06	2.33109e+06	2.72522e+06	471.561	551.292	511.426
cysB	16129236	1382859	b1275	1331879	1332853	+	324	COG0583K	P	DNA-binding transcriptional dual regulator, O-acetyl-L-serine-binding	7	7	1.54327e+06	2.42224e+06	1.54784e+06	2.42035e+06	313.117	489.618	401.368
acnA	16129237	1382860	b1276	1333855	1336530	+	891	COG1048C	P	aconitate hydratase 1	15	15	1164365	1.42775e+06	1.17391e+06	1.27242e+06	237.474	257.401	247.437
ribA	16129238	1382861	b1277	1336594	1337184	-	196	COG0807H	P	GTP cyclohydrolase II	3	3	1.31133e+06	1.60009e+06	1.30434e+06	1595439	263.859	322.745	293.302
yciS	16129240	3249	b1279	1338267	1338575	+	102	COG3771S	P	inner membrane DUF1049 protein YciS	1	1	7958.41	114257
yciM	16129241	3249	b1280	1338582	1339751	+	389	COG2956G	P	TPR-repeats-containing protein	1	1	99402.5	80944.9
pyrF	16129242	3250	b1281	1339945	1340682	+	245	COG0284F	P	orotidine-5'-phosphate decarboxylase	6	6	3.02778e+06	3.59347e+06	3037254	3.59008e+06	614.413	726.245	670.329
yciT	16129245	1382864	b1284	1341621	1342370	-	249	COG1349KG	P	global regulator of transcription; DeoR family	4	4	1.20207e+06	1.16934e+06	1.20379e+06	1.1691e+06	243.517	236.501	240.009
rnb	16129247	3251	b1286	1345002	1346936	-	644	COG4776K	P	ribonuclease II	17	17	4.27597e+06	4216519	5.27363e+06	5015923	1066.81	1014.68	1040.75
fabI	16129249	1382866	b1288	1348275	1349063	-	262	COG0623I	P	enoyl-[acyl-carrier-protein] reductase, NADH-dependent	9	9	23360868	26400694	23370530	26449408	4727.68	5350.51	5039.1
sapA	16129255	3252	b1294	1353491	1355134	-	547	COG4166E	C	antimicrobial peptide transport ABC transporter periplasmic binding protein	2	2	163448	212412	163431	211858	33.0609	42.8574	37.9591
ymjA	16129256	1382867	b1295	1355447	1355692	-	81	-	P	predicted protein	1	1	192426	109776
puuC	16129261	3254	b1300	1360767	1362254	+	495	COG1012C	P	gamma-Glu-gamma-aminobutyraldehyde dehydrogenase, NAD(P)H-dependent	1	1	156651	183522
pspA	16129265	3255	b1304	1366103	1366771	+	222	COG1842KT	P	regulatory protein for phage-shock-protein operon	4	4	1.085e+06	1.21745e+06	1.03872e+06	1203414	210.126	243.441	226.784
pspB	16129266	3255	b1305	1366825	1367049	+	74	-	P	DNA-binding transcriptional regulator of psp operon	1	1	788541	936041
pspE	16129269	3255	b1308	1367713	1368027	+	104	COG0607P	P	thiosulfate:cyanide sulfurtransferase (rhodanese)	3	3	408247	421112	408474	421672	82.6311	85.3011	83.9661
ycjX	16129282	3257	b1321	1382141	1383538	+	465	COG3106R	P	conserved protein with nucleoside triphosphate hydrolase domain	1	1	80025.1	116625
ycjF	16129283	3257	b1322	1383535	1384596	+	353	COG3768S	P	inner membrane protein, UPF0283 family	1	1	138888	148716
tyrR	16129284	1382870	b1323	1384744	1386285	+	513	COG3283KE	P	DNA-binding transcriptional dual regulator, tyrosine-binding	2	2	78162.4	49554.7	53045.3	43894.5	10.7307	8.87953	9.80509
tpx	16129285	1382871	b1324	1386329	1386835	-	168	COG2077O	P	lipid hydroperoxide peroxidase	5	5	12800432	14939296	12773739	14959515	2584.03	3026.2	2805.11
uspE	16129294	1382876	b1333	1395696	1396646	-	316	COG0589T	P	stress-induced protein	7	7	1.67643e+06	2.44725e+06	1.49555e+06	1.43393e+06	302.539	290.073	296.306
fnr	16129295	1382877	b1334	1396798	1397550	-	250	COG0664T	P	DNA-binding transcriptional dual regulator, global regulator of anaerobic growth	3	3	1.29595e+06	1522619	1.2948e+06	1.52428e+06	261.928	308.351	285.14
OGT	16129296	3258	b1335	1397745	1398260	-	171	COG0350L	P	O-6-alkylguanine-DNA:cysteine-protein methyltransferase	1	1	240572	227066
ttcA	16129305	3259	b1344	1409037	1409972	-	311	COG0037D	P	tRNA 2-thiocytidine biosynthesis protein	4	4	264188	235021	244946	235236	49.5508	47.5865	48.5686
racR	16129317	1382882	b1356	1417789	1418265	-	158	-	P	Rac prophage; predicted DNA-binding transcriptional regulator	1	1	801928	774901
pfo	16129339	1382888	b1378	1435284	1438808	-	1174	COG0674C	P	fused predicted pyruvate-flavodoxin oxidoreductase: conserved protein/conserved protein/FeS binding protein	3	3	258200	264683	249757	340797	50.5239	68.9407	59.7323
LDHA	16129341	1382890	b1380	1439878	1440867	-	329	COG1052CHR	P	fermentative D-lactate dehydrogenase, NAD-dependent	3	3	3.2202e+06	3.43595e+06	3217598	3.44556e+06	650.896	697.01	673.953
azoR	16129373	1382895	b1412	1480279	1480884	-	201	COG1182I	P	NADH-azoreductase, FMN-dependent	5	5	2.55221e+06	2.68143e+06	2.64805e+06	2748199	535.68	555.94	545.81
ydcF	16129375	1382896	b1414	1485259	1486059	+	266	COG1434S	P	conserved SAM-binding protein, DUF218 superfamily	4	4	1.18023e+06	1.07261e+06	1.18137e+06	1076949	238.983	217.859	228.421
aldA	16129376	1382897	b1415	1486256	1487695	+	479	COG1012C	P	aldehyde dehydrogenase A, NAD-linked	9	9	4.0481e+06	4220873	4.04297e+06	4.21081e+06	817.862	851.815	834.838
rimL	16129386	1382901	b1427	1496962	1497501	+	179	COG1670J	P	ribosomal-protein-L7/L12-serine acetyltransferase	2	1	246921	235763
tehB	16129389	3272	b1430	1499586	1500179	+	197	COG2813J	P	tellurite resistance protein, SAM-dependent; predicted S-adenosyl-L-methionine-dependent methyltransferase	5	5	1.25077e+06	1.28841e+06	1.25484e+06	1.28652e+06	253.844	260.253	257.048
ydcL	16129390	1382903	b1431	1500481	1501149	+	222	-	P	lipoprotein	7	7	983303	987667	978459	989003	197.935	200.068	199.001
mnaT	16129407	3275	b1448	1516352	1516870	-	172	COG1247M	P	predicted acyltransferase with acyl-CoA N-acyltransferase domain	1	1	1.01051e+06	1.00917e+06
yncE	16129411	1382909	b1452	1521331	1522392	+	353	COG3391S	P	ATP-binding protein, periplasmic, function unknown	12	13	4331836	4235495	5789514	5.0736e+06	1171.17	1026.35	1098.76
fdnG	16129433	3278	b1474	1545425	1548472	+	1015	COG0243C	C	formate dehydrogenase-N, alpha subunit, nitrate-inducible	5	5	617763	547974	618927	546163	125.204	110.485	117.844
sra	16129439	1382915	b1480	1553850	1553987	-	45	-	P	Stationary-phase-induced ribosome-associated protein	1	1	2.0349e+06	2889508
osmC	16129441	1382916	b1482	1554649	1555080	+	143	COG1764O	P	Lipoyl-dependent Cys-based peroxidase, hydroperoxide resistance; salt-shock inducible membrane protein; peroxiredoxin	4	4	1.4646e+06	1.36557e+06	1450801	1.34133e+06	293.486	271.34	282.413
GADC	16129451	1382918	b1492	1566978	1568513	-	511	COG0531E	P	predicted glutamate:gamma-aminobutyric acid antiporter	1	1	212558	160809
gadB	16129452	1382919	b1493	1568669	1570069	-	466	COG0076E	P	glutamate decarboxylase B, PLP-dependent	8	8	891866	912152	896776	911815	181.411	184.453	182.932
dcp	16129497	1382933	b1538	1623359	1625404	-	681	COG0339E	P	dipeptidyl carboxypeptidase II	11	11	2322593	2.55031e+06	2325222	2.53097e+06	470.375	511.996	491.185
ydfG	16129498	1382934	b1539	1625541	1626287	+	248	COG4221R	P	Malonic semialdehyde reductase, NADPH-dependent; L-allo-threonine dehydrogenase, NAD(P)-dependent; also oxidizes L-serine, D-serine, D-threonine and 3-hydroxyisobutyrate	6	6	11005182	9919231	10998726	9951357	2224.96	2013.08	2119.02
rspR	16129499	1382935	b1540	1626376	1627062	+	228	COG1802K	P	predicted DNA-binding transcriptional regulator	1	1	509640	112810
ydfZ	16129500	1382936	b1541	1627239	1627442	+	67	-	P	selenoprotein, function unknown	4	4	22745084	24022308	22649458	24125372	4581.81	4880.38	4731.1
RELB	16129523	3293	b1564	1643657	1643896	-	79	COG3077L	C	Qin prophage; bifunctional antitoxin of the RelE-RelB toxin-antitoxin system/ transcriptional repressor	1	1	567409	609186
ynfB	16129541	3297	b1583	1653832	1654173	+	113	-	P	predicted protein	2	2	2569805	1.73218e+06	2.55476e+06	1.73768e+06	516.809	351.519	434.164
SPEG	16129542	3297	b1584	1654208	1654768	+	186	COG1670J	P	spermidine N1-acetyltransferase	1	1	1.13393e+06	1.41761e+06
ynfE	16129545	3298	b1587	1656093	1658519	+	808	COG0243C	P	probable selenate reductase, periplasmic	2	2	154140	96164.1	163750	101566	33.1253	20.546	26.8357
[truncated: 1,069 more rows]
