# Supplementary material for: Multifaceted Stoichiometry Control of Bacterial Operons Revealed by Deep Proteome Quantification
Source: Front Genet. 2019 May 24;10:473. doi: 10.3389/fgene.2019.00473 (PMC6544118; doi:10.3389/fgene.2019.00473)
Supplement: FIGURE S1 — Physical and chemical features of quantified and unquantified proteins in E. coli. Panels (A–D) are distributions of protein isoelectric point, instability, protein length, and hydrophobicity. Instability tests a protein for stability, which value above 40 means the protein has a shorter half-life. The Kolmogorov–Smirnov test (KS-test) was used to test the distribution between quantified and unquantified proteins. Significance different were found between quantified and unquantified proteins indicated different physical–chemical characterizations of them. [file Data_Sheet_1.zip › Supplementary table S4 P-value of Mann-WhiteneyU test between complex and pathway operons.xlsx]

## Sheet: BW25113
Operon group	Operon group	Complex/Pathway	mann-Whitney U statistic	p-value
2	2	Complex	264.5	0.495615
2	3	Complex	83	0.108611
2	4	Complex	82	0.0268804
2	>=5	Complex	104	0.00354369
3	2	Complex	83	0.108611
3	3	Complex	50	0.484868
3	4	Complex	54	0.35843
3	>=5	Complex	86	0.433366
4	2	Complex	82	0.0268804
4	3	Complex	54	0.35843
4	4	Complex	72	0.488455
4	>=5	Complex	95	0.298345
>=5	2	Complex	104	0.00354369
>=5	3	Complex	86	0.433366
>=5	4	Complex	95	0.298345
>=5	>=5	Complex	162	0.493682
2	2	Pathway	5408	0.49954
2	3	Pathway	2711	0.4344
2	4	Pathway	1957	0.2218
2	>=5	Pathway	2086	0.198962
3	2	Pathway	2711	0.4344
3	3	Pathway	1404.5	0.498739
3	4	Pathway	962	0.172225
3	>=5	Pathway	1015	0.137733
4	2	Pathway	1957	0.2218
4	3	Pathway	962	0.172225
4	4	Pathway	840.5	0.49815
4	>=5	Pathway	895	0.477207
>=5	2	Pathway	2086	0.198962
>=5	3	Pathway	1015	0.137733
>=5	4	Pathway	895	0.477207
>=5	>=5	Pathway	968	0.498335
2	2	Complex_Pathway	759	0.00314104
3	3	Complex_Pathway	246	0.363934
4	4	Complex_Pathway	232	0.387091
>=5	>=5	Complex_Pathway	333	0.166209

## Sheet: MG1655
Operon group	Operon group	Complex/Pathway	mann-Whitney U statistic	p-value
2	2	Complex	180.5	0.494171
2	3	Complex	54	0.0636359
2	4	Complex	46	0.00627809
2	>=5	Complex	32	0.000972102
3	2	Complex	54	0.0636359
3	3	Complex	40.5	0.48231
3	4	Complex	38	0.201659
3	>=5	Complex	26	0.0402844
4	2	Complex	46	0.00627809
4	3	Complex	38	0.201659
4	4	Complex	60.5	0.486863
4	>=5	Complex	51	0.277265
>=5	2	Complex	32	0.000972102
>=5	3	Complex	26	0.0402844
>=5	4	Complex	51	0.277265
>=5	>=5	Complex	60.5	0.486863
2	2	Pathway	1740.5	0.498926
2	3	Pathway	915	0.180077
2	4	Pathway	892	0.334304
2	>=5	Pathway	775	0.0534946
3	2	Pathway	915	0.180077
3	3	Pathway	612.5	0.497656
3	4	Pathway	466	0.120268
3	>=5	Pathway	514	0.219742
4	2	Pathway	892	0.334304
4	3	Pathway	466	0.120268
4	4	Pathway	512	0.497321
4	>=5	Pathway	384	0.0298536
>=5	2	Pathway	775	0.0534946
>=5	3	Pathway	514	0.219742
>=5	4	Pathway	384	0.0298536
>=5	>=5	Pathway	544.5	0.497441
2	2	Complex_Pathway	345	0.0061621
3	3	Complex_Pathway	101	0.0516184
4	4	Complex_Pathway	149	0.23037
>=5	>=5	Complex_Pathway	166	0.342166
