# Supplementary material for: Multifaceted Stoichiometry Control of Bacterial Operons Revealed by Deep Proteome Quantification
Source: Front Genet. 2019 May 24;10:473. doi: 10.3389/fgene.2019.00473 (PMC6544118; doi:10.3389/fgene.2019.00473)
Supplement: FIGURE S1 — Physical and chemical features of quantified and unquantified proteins in E. coli. Panels (A–D) are distributions of protein isoelectric point, instability, protein length, and hydrophobicity. Instability tests a protein for stability, which value above 40 means the protein has a shorter half-life. The Kolmogorov–Smirnov test (KS-test) was used to test the distribution between quantified and unquantified proteins. Significance different were found between quantified and unquantified proteins indicated different physical–chemical characterizations of them. [file Data_Sheet_1.zip › Supplementary table S5 P-value of Gene ontology (GO) overrepresentation of the operons with lower and higher CV than the randomized median.xlsx]

## Sheet: BW25113
PANTHER GO-Slim Terms	L2	L3	L4	L5	H2	H3	H4	H5
BP
cellular amino acid biosynthetic process (GO:0008652)	3.70333
metabolic process (GO:0008152)	3.25727
cellular process (GO:0009987)	3.3536
primary metabolic process (GO:0044238)	4.52871
carbohydrate transport (GO:0008643)						3.52433
CC
organelle (GO:0043226)				9.54061
cytoplasm (GO:0005737)	3.24109				4.28233
intracellular (GO:0005622)					3.91721
cell part (GO:0044464)					3.85078
macromolecular complex (GO:0032991)				6.57025
ribonucleoprotein complex (GO:0030529)				6.96658
ribosome (GO:0005840)				6.96658
MF
RNA binding (GO:0003723)				3.02687
catalytic activity (GO:0003824)	3.26841
transferase activity (GO:0016740)	3.90309
structural constituent of ribosome (GO:0003735)				8.98716
structural molecule activity (GO:0005198)				10.1878
L2-L5 lower than the randomized median
H2-H5 higher than the randomized median

## Sheet: MG1655
PANTHER GO-Slim Terms	L2	L3	L4	L5	H2	H3	H4	H5
BP
coenzyme metabolic process (GO:0006732)					3.93181
metabolic process (GO:0008152)	3.54061				3.36552
nitrogen compound metabolic process (GO:0006807)	3.82391
cellular process (GO:0009987)	3.86646
primary metabolic process (GO:0044238)	3.8041
CC
ribonucleoprotein complex (GO:0030529)				4.1107
ribosome (GO:0005840)				4.1107
organelle (GO:0043226)				3.56225
macromolecular complex (GO:0032991)				3.74958
cytoplasm (GO:0005737)	3.59688			3.83863
intracellular (GO:0005622)	3.06048			3.2815
cell part (GO:0044464)	3.02687			3.22475
MF
structural constituent of ribosome (GO:0003735)				4.68194				4.13608
structural molecule activity (GO:0005198)				4.05601				3.57187
transferase activity, transferring glycosyl groups (GO:0016757)				3.08355
ligase activity (GO:0016874)					3.59688
catalytic activity (GO:0003824)	3.78516
L2-L5 lower than the randomized median
H2-H5 higher than the randomized median
