# Supplementary material for: Multifaceted Stoichiometry Control of Bacterial Operons Revealed by Deep Proteome Quantification
Source: Front Genet. 2019 May 24;10:473. doi: 10.3389/fgene.2019.00473 (PMC6544118; doi:10.3389/fgene.2019.00473)
Supplement: FIGURE S1 — Physical and chemical features of quantified and unquantified proteins in E. coli. Panels (A–D) are distributions of protein isoelectric point, instability, protein length, and hydrophobicity. Instability tests a protein for stability, which value above 40 means the protein has a shorter half-life. The Kolmogorov–Smirnov test (KS-test) was used to test the distribution between quantified and unquantified proteins. Significance different were found between quantified and unquantified proteins indicated different physical–chemical characterizations of them. [file Data_Sheet_1.zip › Supplementary. The relationship of submitted raw data.pdf]

# Relationship of submitted raw data

## Spectrum library files for MG1655

3 process replicates

20180222\_ZJ\_DDA\_MG1655\_1\_library.raw  
20180222\_ZJ\_DDA\_MG1655\_2\_library.raw  
20180222\_ZJ\_DDA\_MG1655\_3\_library.raw

## Spectrum library files for BW25113

3 process replicates

20170616ZJ\_KU1.raw  
20170616ZJ\_KU2.raw  
20170616ZJ\_KU3.raw

## FASTA files

GCF\_000005845.2\_ASM584v2\_iRT.fasta

## DIA raw files for MG1655

2 biological replicates

20180222\_ZJ\_DIA\_MG1655\_1.raw  
20180222\_ZJ\_DIA\_MG1655\_2.raw

## DIA raw files for BW25113

2 biological replicates

20170616ZJ\_BW25113\_1.raw  
20170616ZJ\_BW25113\_2.raw

## Result Files:

Result file with relex criteria

20170616ZJ\_KU\_pep6.msf

Result file with stringent criteria

20170616ZJ\_KU\_pep7.msf

## Result Files:

result file with relex criteria

20180222\_ZJ\_DDA\_MG1655\_pep6\_oldlib.msf

Result file with stringent criteria

20180222\_ZJ\_DDA\_MG1655\_pep7\_oldlib.msf
